# Supplementary material for: Apoplastic pH determines the hypocotyl response to auxin dosage and light
Source: Research Square preprint supplement (doi:10.21203/rs.3.rs-3625192/v1), 2023-12-19
Supplement: Supplementary file 1 [file 3ad3a9997d3420d27cd4ceee.xlsx]

## Sheet: in dark-grown hypocotyls
Genes regulated antagonistically by light and Pic in the dark-grown hypocotyls
gene	Mock-L-H vs Mock-D-H log2fc	padj	5uM-Pic-D-H vs Mock-D-H log2fc	padj.x	50uM-Pic-D-H vs Mock-D-H log2fc	padj.y
AT1G07900	1.81803	4.59174e-07	-1.37479	0.0786928	-1.36743	0.0525909
AT1G11450	3.43286	7.58686e-222	-0.644446	0.000352271	-0.662229	0.000128433
AT1G12200	2.23587	1.37237e-70	-0.585791	0.000386316	-0.792153	9.02426e-08
AT1G21110	1.07457	1.18053e-05	-0.714046	0.0595922	-0.839291	0.00801378
AT1G45201	1.09953	2.44331e-09	-0.707589	0.00342409	-0.587177	0.0185021
AT2G01340	1.12839	3.39357e-09	-0.67168	0.0137456	-0.759321	0.00176076
AT2G15890	1.32449	1.86267e-08	-0.671004	0.0731546	-0.987163	0.000467329
AT2G46890	1.09441	1.01254e-10	-0.70795	0.0028738	-0.853225	7.01011e-05
AT3G53960	3.99775	6.50092e-101	-1.25211	0.000123095	-1.66838	2.68081e-07
AT3G60690	0.99746	5.6068e-10	-0.594548	0.0101297	-0.776822	9.83163e-05
AT4G01450	0.929469	5.29455e-13	-0.735223	1.66477e-06	-0.84612	7.38989e-09
AT4G19420	2.00653	2.41182e-118	-0.621548	3.75027e-10	-0.69341	6.43626e-13
AT4G22690	2.7005	3.87141e-84	-0.766277	3.86458e-06	-0.818381	2.744e-07
AT5G03380	0.923861	3.69618e-21	-0.643781	5.94659e-09	-0.680821	2.87959e-10
AT5G03995	2.96085	3.35022e-17	-1.37286	0.0436665	-1.47861	0.0160357
AT5G25240	0.709849	0.00228012	-0.698203	0.0524673	-0.898666	0.0022752
AT5G49080	1.47973	3.70634e-10	-1.34055	0.000117718	-0.810179	0.0325314
AT5G61420	4.19223	1.13159e-87	-1.13941	0.000680381	-2.09825	3.42332e-10
AT1G09350	-4.93759	7.84578e-18	1.86568	0.0058285	2.33215	7.64635e-05
AT1G11120	-2.18791	2.80773e-29	0.607195	0.000766412	1.10717	6.70234e-14
AT1G11735	-2.53037	5.27922e-08	1.62548	5.2759e-06	2.0675	2.81068e-10
AT1G11740	-3.08127	2.1048e-25	0.721688	0.0352659	0.770189	0.0113899
AT1G18835	-2.55908	2.81312e-06	2.21989	4.28141e-05	2.38075	3.92413e-06
AT1G21460	-1.92045	7.99789e-10	0.989485	0.0157418	1.36924	4.90762e-05
AT1G21980	-0.807831	2.42937e-13	1.29808	2.99839e-32	1.64915	6.4606e-53
AT1G22710	-1.06215	5.95139e-11	0.585857	0.00645659	0.810311	8.40334e-06
AT1G23080	-1.08159	2.46412e-13	0.703639	5.58615e-05	0.964685	9.09985e-10
AT1G23510	-4.32341	0.0015565	1.67767	0.0366968	2.37827	0.000123301
AT1G25425	-1.2485	2.47924e-08	0.690743	0.00929755	0.814199	0.000467329
AT1G26945	-2.57837	1.65653e-29	1.52735	3.59426e-12	2.4654	6.66654e-33
AT1G29290	-1.99977	3.54596e-18	2.24127	5.59911e-46	2.96867	1.21356e-83
AT1G29490	-1.86644	1.958e-05	2.55752	5.86441e-25	4.13123	5.04615e-71
AT1G30100	-2.49389	0.0131234	3.69944	1.19143e-16	4.96437	1.20018e-31
AT1G31120	-1.61765	8.67849e-50	0.676594	2.7506e-10	0.887736	2.18589e-18
AT1G31173	-3.9141	3.53312e-29	0.719278	0.0235777	0.90681	0.000618222
AT1G47860	-2.30641	8.95479e-63	0.950868	6.96632e-15	1.32796	4.05874e-30
AT1G49780	-0.871541	3.6604e-10	0.867511	1.73433e-10	1.03574	1.59197e-15
AT1G51170	-0.616004	6.74216e-05	1.72541	1.50197e-32	2.21019	1.42056e-54
AT1G52565	-0.891816	8.0429e-05	0.613768	0.0344636	0.853544	0.00018392
AT1G52830	-3.3629	2.17642e-48	2.83363	1.07858e-66	3.69554	5.96568e-115
AT1G52855	-4.70124	1.69444e-32	0.633836	0.0119788	0.935833	4.67294e-06
AT1G54120	-2.93583	1.51185e-10	1.68292	7.48454e-07	2.51461	2.42664e-16
AT1G60010	-1.24431	1.08965e-14	1.23265	2.30277e-14	1.39808	6.98725e-19
AT1G60020	-3.34785	0.0309176	2.80635	0.0188718	2.85163	0.00973622
AT1G60630	-0.830227	0.00519649	0.854468	0.0156865	0.929698	0.00333344
AT1G61255	-4.40281	7.94682e-104	0.736986	5.55389e-07	0.822651	4.84591e-09
AT1G63410	-5.38948	1.14072e-06	1.4667	5.8559e-05	2.08876	7.67926e-11
AT1G63420	-0.654816	1.57202e-07	0.842227	4.97055e-12	1.30525	1.76044e-30
AT1G65920	-2.67953	1.16131e-72	0.893048	5.27745e-11	1.29036	6.63652e-24
AT1G67265	-4.39068	3.60377e-19	0.936048	0.054446	1.30272	0.000575539
AT1G67770	-1.9045	0.0956909	1.84721	0.0772281	2.29897	0.00486062
AT1G68360	-0.976843	0.000266113	0.907929	0.00688065	1.16548	5.40459e-05
AT1G68620	-2.96961	4.02795e-36	0.615629	0.0501766	0.915448	0.000139829
AT1G70550	-0.763911	4.37505e-08	0.815058	3.69878e-09	1.1149	5.2904e-18
AT1G74110	-3.80794	7.62672e-05	2.84241	7.008e-12	4.06034	1.22889e-25
AT1G75490	-1.19748	1.01699e-07	0.625705	0.036218	0.971302	1.99262e-05
AT1G75640	-0.669652	0.000244534	0.863493	4.91421e-06	1.34607	1.02427e-15
AT1G80240	-2.30034	6.38571e-28	1.6346	1.90693e-14	2.19718	8.43302e-27
AT2G04038	-2.00276	0.00060884	1.32583	0.0240238	1.15264	0.0529452
AT2G13810	-2.8979	0.00523382	1.47742	0.0871806	2.23601	0.000284134
AT2G18010	-5.36176	1.70399e-09	2.3701	1.22739e-26	3.69066	1.14344e-68
AT2G21195	-0.85274	9.55773e-07	0.614705	0.0015444	0.5944	0.00156348
AT2G25000	-1.2538	4.79098e-07	0.977439	0.0011306	1.0209	0.000305144
AT2G26710	-1.1098	1.60644e-11	2.44011	9.51288e-67	3.14598	3.6663e-113
AT2G28350	-0.90878	1.12944e-09	1.20482	4.84077e-16	1.57227	4.18591e-28
AT2G39370	-2.17214	3.17433e-15	2.43283	9.89977e-32	3.37853	3.73501e-63
AT2G41170	-1.69982	1.08531e-20	0.912851	1.35467e-06	1.13113	1.44055e-10
AT2G42380	-1.47497	2.84543e-08	1.02609	0.000776982	1.83772	5.0972e-13
AT2G42430	-1.37207	7.70572e-11	2.35546	3.33074e-46	2.85579	1.04218e-69
AT2G45420	-1.18311	0.0020097	1.6076	1.38453e-05	2.08545	6.15716e-10
AT2G47130	-1.26027	2.17751e-10	0.94518	1.38453e-05	1.26028	2.18007e-10
AT3G02493	-1.78584	0.00198974	1.18251	0.0852325	1.22991	0.0403008
AT3G04570	-0.695504	1.93938e-05	0.793749	7.96374e-06	0.890548	1.19081e-07
AT3G14362	-1.19175	0.000252413	2.27941	1.04222e-20	2.88185	1.39485e-34
AT3G14370	-2.7007	4.61002e-67	1.2071	1.47276e-16	1.5986	7.88299e-30
AT3G14440	-3.26985	3.47295e-62	0.826113	0.000210509	1.11048	2.62287e-08
AT3G15540	-0.845293	7.35633e-07	2.35086	1.21512e-45	3.17926	1.6692e-84
AT3G20830	-0.638024	5.54235e-06	1.28827	4.3004e-22	1.67714	1.61286e-38
AT3G22820	-1.72814	0.00265727	1.37174	0.0112585	2.05249	1.80094e-06
AT3G23640	-0.74791	3.53853e-09	0.81292	2.45152e-09	0.970965	9.68388e-14
AT3G25930	-2.40253	5.5469e-24	0.713725	0.0296932	0.894105	0.00105386
AT3G28455	-0.887879	0.000437186	0.794639	0.00321572	1.57197	3.79398e-14
AT3G28857	-3.44703	3.39522e-12	1.1808	0.00568804	2.06884	1.09503e-09
AT3G42800	-1.3878	8.28976e-06	1.30286	6.7892e-05	2.30275	2.41268e-16
AT3G44610	-1.09888	2.05029e-10	1.31494	1.34915e-16	1.63938	1.11769e-26
AT3G50800	-1.98267	2.83629e-25	0.721532	0.000301354	1.39901	3.83157e-17
AT3G55740	-0.90297	1.63921e-08	0.858868	3.43262e-07	1.17666	3.50731e-14
AT3G58190	-1.60574	2.36016e-05	5.14971	1.03945e-105	5.8023	1.63306e-135
AT3G59900	-1.83589	1.349e-20	0.648031	0.018196	1.21568	6.60031e-09
AT3G60650	-2.99271	7.38133e-07	1.70608	4.29369e-07	2.75206	1.74857e-20
AT4G01975	-1.95634	0.000880387	1.76312	0.000468101	2.04711	8.41857e-06
AT4G08040	-0.604626	8.68586e-08	0.787191	4.16164e-12	1.21057	5.99518e-30
AT4G10160	-7.42153	7.15387e-09	1.64043	0.00074529	2.04118	2.61706e-06
AT4G12110	-0.758893	5.81034e-09	0.963563	1.92334e-13	1.19471	3.02364e-21
AT4G13790	-8.67619	2.01653e-12	1.90704	3.64224e-18	2.98741	5.06753e-47
AT4G14819	-7.82547	1.69889e-09	2.2223	1.65113e-05	3.2486	2.22947e-12
AT4G16515	-4.56246	2.82993e-53	1.48086	4.28286e-07	1.94014	1.17018e-12
AT4G17350	-0.838464	1.70941e-05	1.36451	4.8932e-14	2.01388	4.87255e-32
AT4G17615	-0.637924	0.000177189	0.606344	0.00593876	0.795464	2.63836e-05
AT4G17695	-0.774529	0.000527351	0.60422	0.0642946	0.720705	0.00732378
AT4G21200	-3.96674	3.05818e-14	2.29085	6.38151e-08	3.08761	5.30484e-15
AT4G21730	-3.84721	9.64862e-32	1.57939	2.21634e-18	2.13821	4.18323e-35
AT4G21745	-2.21099	4.28678e-05	3.26583	1.89664e-24	3.90444	5.1465e-36
AT4G25420	-2.01769	1.30209e-07	2.40186	3.23242e-11	3.29459	7.66048e-22
AT4G26540	-0.673897	1.94671e-09	0.675765	7.51126e-10	0.948937	1.55509e-20
AT4G27260	-0.654505	0.000887312	3.47247	1.60056e-77	3.95583	2.72421e-101
AT4G28790	-0.634797	0.0368432	0.830601	0.0245033	0.974325	0.00200722
AT4G31630	-3.13284	0.0341103	3.4366	2.16913e-05	3.91098	2.30341e-07
AT4G31910	-1.09145	2.84423e-18	1.01674	2.00078e-15	1.40665	2.2814e-30
AT4G32280	-2.10483	2.68883e-10	2.17475	2.83895e-17	3.4993	5.28263e-47
AT4G36110	-2.7987	2.62345e-45	1.74407	3.24635e-29	2.38375	4.45729e-56
AT4G37890	-1.69274	3.86885e-14	1.89003	5.43462e-21	2.30059	7.19544e-32
AT5G02760	-2.91599	5.75406e-12	1.83944	0.000211392	2.86395	3.87519e-11
AT5G03640	-2.1138	2.73937e-17	0.94707	9.09591e-06	1.13159	1.14212e-08
AT5G05090	-1.15675	1.74456e-05	0.788204	0.0311647	1.13368	8.48888e-05
AT5G09805	-1.03611	0.0277645	1.08212	0.0587994	1.1824	0.016288
AT5G18010	-2.99967	3.31536e-11	2.17744	1.07206e-11	3.39156	7.88189e-30
AT5G18050	-3.38195	1.00905e-14	2.28446	5.92282e-21	3.53893	9.08951e-53
AT5G18060	-3.09493	9.72962e-17	2.15214	4.88685e-25	3.40205	4.14584e-66
AT5G18560	-1.03928	0.0856951	1.99986	9.41789e-05	3.03586	5.6478e-12
AT5G20110	-1.44693	0.000163012	0.991404	0.0892309	1.21169	0.00965892
AT5G24320	-1.05176	5.35277e-12	0.708167	4.47389e-05	0.80855	6.59858e-07
AT5G24870	-1.61078	1.70458e-24	0.631914	0.000384933	0.679853	4.70932e-05
AT5G26930	-4.24811	0.0019013	2.18624	0.00114121	2.88566	7.28314e-07
AT5G37940	-2.66034	0.00395138	2.26479	0.000171944	2.5396	5.38291e-06
AT5G37950	-8.89153	6.90165e-13	1.74015	6.59897e-12	2.17999	2.8594e-19
AT5G37960	-4.68378	0.00090385	2.58362	0.00156245	3.1691	1.11457e-05
AT5G39860	-7.06733	4.88659e-16	1.6839	4.65404e-24	2.39678	7.78105e-51
AT5G42030	-0.787565	1.3699e-09	0.637006	1.8537e-05	0.748754	7.24749e-08
AT5G44680	-0.661107	0.033906	0.940718	0.0213541	1.12968	0.0012137
AT5G46240	-2.3188	3.82369e-17	1.19812	1.45998e-05	2.07453	1.05182e-17
AT5G50915	-3.26139	1.77535e-34	1.40196	4.58882e-07	1.75252	1.80181e-11
AT5G51810	-1.13591	0.00431253	1.88592	6.67006e-07	2.48523	1.28815e-12
AT5G54470	-2.30558	1.18589e-17	0.880168	0.00352533	1.0127	0.000185754
AT5G57340	-1.88748	2.09575e-33	0.725883	3.59739e-05	0.979341	7.59979e-10
AT5G58580	-0.985	0.000998594	1.0353	0.00081214	1.19637	2.03717e-05
AT5G59510	-2.03867	8.93586e-10	0.813755	0.0679159	0.905094	0.0168374
AT5G66260	-2.86249	4.75207e-05	2.17946	3.07242e-06	2.72678	2.42689e-10
AT5G66580	-1.36909	3.52591e-10	2.31132	2.18348e-35	3.45405	9.85794e-82
AT5G66590	-2.89345	6.09578e-50	1.11623	1.62002e-09	1.33544	4.43966e-14
AT5G67430	-3.79513	5.34856e-07	1.45682	0.00118419	1.99813	2.33155e-07
ATCG00750	-1.39213	0.0074513	2.0277	4.15194e-05	1.22849	0.0413657
ATMG00090	-0.904481	0.00805489	1.42272	3.72117e-05	0.759137	0.0976904

## Sheet: in light-grown hypocotyls
Genes regulated antagonistically by light and Pic in the light-grown hypocotyls
gene	Mock-L-H vs Mock-D-H log2fc	padj	5uM-Pic-L-H vs Mock-L-H log2fc	padj.x	50uM-Pic-L-H vs Mock-L-H log2fc	padj.y
AT1G07150	-0.837816	1.00224e-07	0.636678	0.00249539	1.32466	1.00851e-16
AT1G09350	-4.93759	7.84578e-18	2.96066	2.67656e-05	4.0076	6.65702e-11
AT1G11000	-1.88998	5.99826e-35	0.677873	0.00116282	1.15478	3.05274e-12
AT1G11120	-2.18791	2.80773e-29	1.37744	1.70166e-09	1.77985	8.12088e-18
AT1G12080	-5.27092	0	0.611651	0.000314285	1.19902	1.95243e-18
AT1G12740	-1.80209	4.74219e-19	0.669585	0.0522649	0.599475	0.0402063
AT1G13430	-3.58807	3.10793e-50	0.768509	0.0866981	1.57889	5.23514e-09
AT1G14280	-1.50196	6.67809e-23	0.667053	0.00122509	1.17744	4.01799e-13
AT1G21050	-2.02608	5.30743e-31	1.05197	4.38852e-07	0.837756	6.31209e-05
AT1G21980	-0.807831	2.42937e-13	0.949902	4.11878e-16	1.52239	9.32698e-44
AT1G23080	-1.08159	2.46412e-13	0.813438	2.87484e-06	1.42974	2.77044e-21
AT1G26945	-2.57837	1.65653e-29	2.67712	1.22884e-29	4.32457	1.12857e-81
AT1G27210	-0.618508	5.74847e-06	0.664385	4.66046e-05	1.18625	3.97536e-18
AT1G29290	-1.99977	3.54596e-18	0.900614	0.0134926	2.41434	1.60687e-25
AT1G29490	-1.86644	1.958e-05	3.73306	4.99947e-19	5.92468	1.37066e-52
AT1G30100	-2.49389	0.0131234	2.84699	0.0786473	6.13198	1.03897e-10
AT1G47860	-2.30641	8.95479e-63	0.719289	9.81949e-05	1.18301	6.92702e-15
AT1G51170	-0.616004	6.74216e-05	1.33812	1.44611e-17	2.44848	3.29033e-63
AT1G52830	-3.3629	2.17642e-48	1.6221	3.7128e-09	2.97534	2.62254e-36
AT1G53470	-2.08046	9.27548e-37	0.603174	0.019575	0.651094	0.00208383
AT1G60010	-1.24431	1.08965e-14	0.899587	2.3472e-06	1.23376	2.91436e-13
AT1G62440	-2.235	4.75345e-81	0.62487	3.39424e-05	1.06029	5.07249e-17
AT1G62770	-3.7522	6.13791e-120	0.834557	7.45671e-05	1.24335	3.40082e-12
AT1G63420	-0.654816	1.57202e-07	0.892742	2.50919e-11	1.67752	5.9984e-45
AT1G63840	-1.40161	5.59187e-37	0.585373	2.62789e-05	0.6391	4.44738e-07
AT1G65920	-2.67953	1.16131e-72	1.03142	7.79123e-09	2.72986	4.41003e-74
AT1G68620	-2.96961	4.02795e-36	0.823685	0.0432719	1.79734	3.36453e-12
AT1G70560	-2.68732	1.77938e-37	0.911072	0.00279455	1.1792	1.96663e-06
AT1G74110	-3.80794	7.62672e-05	2.85335	0.0932799	5.60421	1.93605e-08
AT1G75490	-1.19748	1.01699e-07	1.25473	1.3227e-06	1.6498	8.11035e-13
AT1G80240	-2.30034	6.38571e-28	1.02797	0.000104935	1.64263	1.90986e-13
AT2G04090	-1.54822	4.32111e-06	1.02828	0.0869934	1.29895	0.0015864
AT2G22800	-0.788172	0.00024319	0.855314	0.00222961	0.994757	2.63279e-05
AT2G26710	-1.1098	1.60644e-11	1.33834	1.51337e-14	2.93171	3.58251e-79
AT2G27000	-1.57169	2.04734e-16	0.673047	0.0255248	0.727785	0.00276769
AT2G28350	-0.90878	1.12944e-09	0.691907	0.000212429	0.908292	1.59462e-08
AT2G34650	-1.4523	1.36773e-13	0.645398	0.0491268	1.1701	6.10196e-08
AT2G39370	-2.17214	3.17433e-15	3.45069	1.67449e-36	4.67282	6.62645e-71
AT2G41170	-1.69982	1.08531e-20	0.682704	0.0139579	1.70018	2.02412e-19
AT2G41850	-3.80332	4.17003e-23	1.42733	0.0152883	1.45801	0.00332162
AT2G42380	-1.47497	2.84543e-08	0.882309	0.0363358	1.81998	5.58359e-11
AT2G42430	-1.37207	7.70572e-11	2.12606	8.76023e-24	2.59009	9.42571e-38
AT2G47130	-1.26027	2.17751e-10	0.992258	4.12284e-05	1.69285	6.91958e-17
AT3G05980	-1.33009	0.000794721	1.28006	0.0341317	1.17937	0.0222115
AT3G07010	-2.12017	1.22705e-46	1.0579	2.2812e-10	1.63446	9.98268e-27
AT3G12610	-2.8545	2.10768e-67	0.580663	0.0255248	0.8798	3.59455e-06
AT3G12710	-1.87582	7.93708e-29	0.822675	9.18253e-05	0.987536	1.28777e-07
AT3G14362	-1.19175	0.000252413	2.6027	1.05533e-16	3.70047	4.11362e-37
AT3G14370	-2.7007	4.61002e-67	0.6314	0.00808623	1.43986	1.00552e-17
AT3G14440	-3.26985	3.47295e-62	0.9717	0.00015868	1.47796	6.62086e-12
AT3G14560	-1.16572	8.7309e-24	0.588316	5.3761e-05	1.19263	1.37133e-23
AT3G15540	-0.845293	7.35633e-07	1.40145	4.20644e-15	3.16228	1.16572e-81
AT3G20830	-0.638024	5.54235e-06	0.911734	2.21404e-09	1.3974	3.70487e-24
AT3G22820	-1.72814	0.00265727	1.91894	0.0193177	2.14008	0.00113112
AT3G23175	-2.03634	7.04034e-34	0.651896	0.0110865	0.648639	0.00327457
AT3G28455	-0.887879	0.000437186	1.12061	0.000219225	2.36244	2.51491e-24
AT3G29370	-3.70465	3.70816e-16	1.77036	0.0114871	2.91399	5.28595e-09
AT3G42800	-1.3878	8.28976e-06	1.67329	2.74387e-06	2.81695	2.62777e-20
AT3G50890	-0.948764	0.00198843	1.51101	1.37227e-05	2.22942	6.97393e-14
AT3G51410	-3.58774	8.13282e-10	2.72935	0.000242296	3.08302	2.57578e-06
AT3G55720	-0.998736	4.1832e-06	1.15383	4.2333e-06	1.34701	2.63084e-09
AT3G55740	-0.90297	1.63921e-08	0.675188	0.00133744	1.09352	6.767e-11
AT3G58120	-2.29367	6.9477e-51	0.765106	9.37162e-05	1.45569	1.7575e-19
AT3G58190	-1.60574	2.36016e-05	4.13843	4.67544e-32	5.22321	6.66037e-54
AT3G59900	-1.83589	1.349e-20	0.741903	0.00996914	1.91611	4.10638e-21
AT3G60650	-2.99271	7.38133e-07	3.14311	8.98838e-06	4.57015	3.47715e-14
AT4G04710	-2.59653	1.47217e-13	1.40419	0.00872979	1.78548	1.76247e-05
AT4G08040	-0.604626	8.68586e-08	0.608095	4.2333e-06	1.02224	2.27748e-19
AT4G13130	-3.02361	1.37723e-39	0.963199	0.00981311	1.06932	0.000483011
AT4G16515	-4.56246	2.82993e-53	1.72815	2.33968e-06	2.70685	9.85996e-18
AT4G17350	-0.838464	1.70941e-05	0.694437	0.0138857	1.9374	5.52146e-25
AT4G21200	-3.96674	3.05818e-14	1.81712	0.035049	2.48744	5.78208e-05
AT4G21730	-3.84721	9.64862e-32	1.62696	0.000387811	3.23061	6.86591e-21
AT4G22620	-1.91442	2.66913e-12	0.830144	0.0931439	1.27112	7.27251e-05
AT4G22810	-1.77377	3.70243e-20	0.772163	0.00546078	0.626157	0.0179071
AT4G25410	-2.39859	1.77191e-15	1.98116	6.11841e-09	2.29301	5.17811e-13
AT4G26540	-0.673897	1.94671e-09	0.917104	6.0493e-15	1.54021	6.29346e-47
AT4G27260	-0.654505	0.000887312	2.45623	4.15401e-37	4.10561	9.40808e-108
AT4G31590	-0.810912	1.45848e-16	0.598205	1.28376e-07	1.34067	6.84428e-43
AT4G31910	-1.09145	2.84423e-18	0.907004	5.09268e-11	1.81277	7.04182e-48
AT4G32280	-2.10483	2.68883e-10	1.65499	6.64447e-05	4.72172	1.8622e-50
AT4G36110	-2.7987	2.62345e-45	2.38688	2.83704e-30	3.03683	2.7344e-52
AT5G02760	-2.91599	5.75406e-12	1.75639	0.00194647	3.86862	4.52505e-19
AT5G03150	-0.973954	1.95798e-07	0.688223	0.00948185	0.992713	1.36561e-06
AT5G06839	-2.45727	1.7381e-31	0.974857	0.000954001	0.68817	0.0263778
AT5G12050	-1.15991	1.27061e-09	0.780362	0.00323403	1.87503	1.77307e-23
AT5G18010	-2.99967	3.31536e-11	2.15464	0.000207743	3.30433	2.48369e-12
AT5G18050	-3.38195	1.00905e-14	2.54355	1.22484e-06	3.24579	2.2339e-12
AT5G18060	-3.09493	9.72962e-17	1.90807	7.94131e-05	3.09991	1.43763e-15
AT5G20820	-1.26616	0.000197473	1.59437	8.02116e-05	2.3694	5.63783e-12
AT5G22890	-1.63389	3.02176e-11	0.75706	0.0912586	0.977781	0.00144241
AT5G24320	-1.05176	5.35277e-12	0.610387	0.0036488	0.768949	8.70558e-06
AT5G25190	-0.615317	0.0101069	1.10822	5.29721e-05	2.17169	4.56579e-22
AT5G25460	-1.35965	6.37919e-10	0.682107	0.0603459	0.967658	0.000156409
AT5G26930	-4.24811	0.0019013	5.86335	0.000326154	8.06619	4.99517e-09
AT5G28646	-1.94442	0.000158306	1.55918	0.0746046	1.9466	0.00143308
AT5G41280	-2.80387	2.8427e-08	1.64124	0.0571694	2.08723	0.000683841
AT5G47440	-1.22187	0.0793522	1.83473	0.0994822	3.61202	2.5251e-08
AT5G48900	-1.74653	1.49385e-22	0.81811	0.000358437	1.36647	5.17811e-13
AT5G50915	-3.26139	1.77535e-34	1.1206	0.00284712	2.25347	1.46648e-15
AT5G51670	-1.95933	4.40708e-32	0.83071	7.96945e-05	1.92932	7.226e-30
AT5G59590	-2.15944	2.48209e-23	1.11237	3.46362e-05	1.13287	5.30543e-06
AT5G62170	-1.18142	2.28489e-09	0.984079	5.00219e-05	1.77164	2.77994e-19
AT5G62280	-2.85742	2.42781e-22	1.27255	0.00140568	2.10958	2.31162e-11
AT5G66580	-1.36909	3.52591e-10	1.98338	8.06978e-19	3.23177	1.03103e-54
AT5G66590	-2.89345	6.09578e-50	1.3572	2.67792e-09	2.46331	8.48212e-35
AT5G66600	-0.655204	0.000919473	0.674176	0.0178514	0.650769	0.00777672
AT5G67430	-3.79513	5.34856e-07	3.72068	4.48252e-05	3.91222	2.67033e-06
AT1G68430	1.40722	6.15382e-09	-0.877105	0.00564153	-0.582344	0.0626751
AT1G68520	2.56096	5.60456e-18	-0.886882	0.0786513	-1.52714	3.80402e-06
AT1G68570	1.18665	5.62394e-06	-0.838883	0.0339102	-0.932576	0.00300771
AT2G34010	1.00165	5.4635e-07	-0.759827	0.004591	-0.940072	3.00148e-05
AT2G46890	1.09441	1.01254e-10	-0.966352	6.867e-07	-1.60807	2.6052e-19
AT2G47240	0.90684	4.09876e-14	-0.801819	1.78149e-09	-0.611514	5.05483e-06
AT3G47420	0.928235	1.05714e-05	-0.641566	0.0603459	-0.677781	0.0107703
AT3G53960	3.99775	6.50092e-101	-0.777695	2.06867e-05	-0.906002	4.27266e-08
AT4G24015	2.5563	7.70489e-88	-0.629182	7.39703e-06	-1.17068	2.02982e-21
AT5G65410	0.639903	0.00944638	-0.696934	0.0947541	-0.612403	0.068149
AT5G65730	5.06972	6.628e-32	-0.745127	0.0346148	-1.0963	2.86779e-05

## Sheet: dark- and light-grown hypocotyl
Genes regulated antagonistically by light and Pic in both the dark- and light-grown hypocotyls
gene	Mock-L-H vs Mock-D-H log2fc	padj	5uM-Pic-D-H vs Mock-D-H log2fc	padj.x	5uM-Pic-L-H vs Mock-L-H log2fc	padj.x	50uM-Pic-D-H vs Mock-D-H log2fc	padj.y	50uM-Pic-L-H vs Mock-L-H log2fc	padj.y
AT1G09350	-4.93759	7.84578e-18	1.86568	0.0058285	2.96066	2.67656e-05	2.33215	7.64635e-05	4.0076	6.65702e-11
AT1G11120	-2.18791	2.80773e-29	0.607195	0.000766412	1.37744	1.70166e-09	1.10717	6.70234e-14	1.77985	8.12088e-18
AT1G21980	-0.807831	2.42937e-13	1.29808	2.99839e-32	0.949902	4.11878e-16	1.64915	6.4606e-53	1.52239	9.32698e-44
AT1G23080	-1.08159	2.46412e-13	0.703639	5.58615e-05	0.813438	2.87484e-06	0.964685	9.09985e-10	1.42974	2.77044e-21
AT1G26945	-2.57837	1.65653e-29	1.52735	3.59426e-12	2.67712	1.22884e-29	2.4654	6.66654e-33	4.32457	1.12857e-81
AT1G29290	-1.99977	3.54596e-18	2.24127	5.59911e-46	0.900614	0.0134926	2.96867	1.21356e-83	2.41434	1.60687e-25
AT1G29490	-1.86644	1.958e-05	2.55752	5.86441e-25	3.73306	4.99947e-19	4.13123	5.04615e-71	5.92468	1.37066e-52
AT1G30100	-2.49389	0.0131234	3.69944	1.19143e-16	2.84699	0.0786473	4.96437	1.20018e-31	6.13198	1.03897e-10
AT1G47860	-2.30641	8.95479e-63	0.950868	6.96632e-15	0.719289	9.81949e-05	1.32796	4.05874e-30	1.18301	6.92702e-15
AT1G51170	-0.616004	6.74216e-05	1.72541	1.50197e-32	1.33812	1.44611e-17	2.21019	1.42056e-54	2.44848	3.29033e-63
AT1G52830	-3.3629	2.17642e-48	2.83363	1.07858e-66	1.6221	3.7128e-09	3.69554	5.96568e-115	2.97534	2.62254e-36
AT1G60010	-1.24431	1.08965e-14	1.23265	2.30277e-14	0.899587	2.3472e-06	1.39808	6.98725e-19	1.23376	2.91436e-13
AT1G63420	-0.654816	1.57202e-07	0.842227	4.97055e-12	0.892742	2.50919e-11	1.30525	1.76044e-30	1.67752	5.9984e-45
AT1G65920	-2.67953	1.16131e-72	0.893048	5.27745e-11	1.03142	7.79123e-09	1.29036	6.63652e-24	2.72986	4.41003e-74
AT1G68620	-2.96961	4.02795e-36	0.615629	0.0501766	0.823685	0.0432719	0.915448	0.000139829	1.79734	3.36453e-12
AT1G74110	-3.80794	7.62672e-05	2.84241	7.008e-12	2.85335	0.0932799	4.06034	1.22889e-25	5.60421	1.93605e-08
AT1G75490	-1.19748	1.01699e-07	0.625705	0.036218	1.25473	1.3227e-06	0.971302	1.99262e-05	1.6498	8.11035e-13
AT1G80240	-2.30034	6.38571e-28	1.6346	1.90693e-14	1.02797	0.000104935	2.19718	8.43302e-27	1.64263	1.90986e-13
AT2G26710	-1.1098	1.60644e-11	2.44011	9.51288e-67	1.33834	1.51337e-14	3.14598	3.6663e-113	2.93171	3.58251e-79
AT2G28350	-0.90878	1.12944e-09	1.20482	4.84077e-16	0.691907	0.000212429	1.57227	4.18591e-28	0.908292	1.59462e-08
AT2G39370	-2.17214	3.17433e-15	2.43283	9.89977e-32	3.45069	1.67449e-36	3.37853	3.73501e-63	4.67282	6.62645e-71
AT2G41170	-1.69982	1.08531e-20	0.912851	1.35467e-06	0.682704	0.0139579	1.13113	1.44055e-10	1.70018	2.02412e-19
AT2G42380	-1.47497	2.84543e-08	1.02609	0.000776982	0.882309	0.0363358	1.83772	5.0972e-13	1.81998	5.58359e-11
AT2G42430	-1.37207	7.70572e-11	2.35546	3.33074e-46	2.12606	8.76023e-24	2.85579	1.04218e-69	2.59009	9.42571e-38
AT2G47130	-1.26027	2.17751e-10	0.94518	1.38453e-05	0.992258	4.12284e-05	1.26028	2.18007e-10	1.69285	6.91958e-17
AT3G14362	-1.19175	0.000252413	2.27941	1.04222e-20	2.6027	1.05533e-16	2.88185	1.39485e-34	3.70047	4.11362e-37
AT3G14370	-2.7007	4.61002e-67	1.2071	1.47276e-16	0.6314	0.00808623	1.5986	7.88299e-30	1.43986	1.00552e-17
AT3G14440	-3.26985	3.47295e-62	0.826113	0.000210509	0.9717	0.00015868	1.11048	2.62287e-08	1.47796	6.62086e-12
AT3G15540	-0.845293	7.35633e-07	2.35086	1.21512e-45	1.40145	4.20644e-15	3.17926	1.6692e-84	3.16228	1.16572e-81
AT3G20830	-0.638024	5.54235e-06	1.28827	4.3004e-22	0.911734	2.21404e-09	1.67714	1.61286e-38	1.3974	3.70487e-24
AT3G22820	-1.72814	0.00265727	1.37174	0.0112585	1.91894	0.0193177	2.05249	1.80094e-06	2.14008	0.00113112
AT3G28455	-0.887879	0.000437186	0.794639	0.00321572	1.12061	0.000219225	1.57197	3.79398e-14	2.36244	2.51491e-24
AT3G42800	-1.3878	8.28976e-06	1.30286	6.7892e-05	1.67329	2.74387e-06	2.30275	2.41268e-16	2.81695	2.62777e-20
AT3G55740	-0.90297	1.63921e-08	0.858868	3.43262e-07	0.675188	0.00133744	1.17666	3.50731e-14	1.09352	6.767e-11
AT3G58190	-1.60574	2.36016e-05	5.14971	1.03945e-105	4.13843	4.67544e-32	5.8023	1.63306e-135	5.22321	6.66037e-54
AT3G59900	-1.83589	1.349e-20	0.648031	0.018196	0.741903	0.00996914	1.21568	6.60031e-09	1.91611	4.10638e-21
AT3G60650	-2.99271	7.38133e-07	1.70608	4.29369e-07	3.14311	8.98838e-06	2.75206	1.74857e-20	4.57015	3.47715e-14
AT4G08040	-0.604626	8.68586e-08	0.787191	4.16164e-12	0.608095	4.2333e-06	1.21057	5.99518e-30	1.02224	2.27748e-19
AT4G16515	-4.56246	2.82993e-53	1.48086	4.28286e-07	1.72815	2.33968e-06	1.94014	1.17018e-12	2.70685	9.85996e-18
AT4G17350	-0.838464	1.70941e-05	1.36451	4.8932e-14	0.694437	0.0138857	2.01388	4.87255e-32	1.9374	5.52146e-25
AT4G21200	-3.96674	3.05818e-14	2.29085	6.38151e-08	1.81712	0.035049	3.08761	5.30484e-15	2.48744	5.78208e-05
AT4G21730	-3.84721	9.64862e-32	1.57939	2.21634e-18	1.62696	0.000387811	2.13821	4.18323e-35	3.23061	6.86591e-21
AT4G26540	-0.673897	1.94671e-09	0.675765	7.51126e-10	0.917104	6.0493e-15	0.948937	1.55509e-20	1.54021	6.29346e-47
AT4G27260	-0.654505	0.000887312	3.47247	1.60056e-77	2.45623	4.15401e-37	3.95583	2.72421e-101	4.10561	9.40808e-108
AT4G31910	-1.09145	2.84423e-18	1.01674	2.00078e-15	0.907004	5.09268e-11	1.40665	2.2814e-30	1.81277	7.04182e-48
AT4G32280	-2.10483	2.68883e-10	2.17475	2.83895e-17	1.65499	6.64447e-05	3.4993	5.28263e-47	4.72172	1.8622e-50
AT4G36110	-2.7987	2.62345e-45	1.74407	3.24635e-29	2.38688	2.83704e-30	2.38375	4.45729e-56	3.03683	2.7344e-52
AT5G02760	-2.91599	5.75406e-12	1.83944	0.000211392	1.75639	0.00194647	2.86395	3.87519e-11	3.86862	4.52505e-19
AT5G18010	-2.99967	3.31536e-11	2.17744	1.07206e-11	2.15464	0.000207743	3.39156	7.88189e-30	3.30433	2.48369e-12
AT5G18050	-3.38195	1.00905e-14	2.28446	5.92282e-21	2.54355	1.22484e-06	3.53893	9.08951e-53	3.24579	2.2339e-12
AT5G18060	-3.09493	9.72962e-17	2.15214	4.88685e-25	1.90807	7.94131e-05	3.40205	4.14584e-66	3.09991	1.43763e-15
AT5G24320	-1.05176	5.35277e-12	0.708167	4.47389e-05	0.610387	0.0036488	0.80855	6.59858e-07	0.768949	8.70558e-06
AT5G26930	-4.24811	0.0019013	2.18624	0.00114121	5.86335	0.000326154	2.88566	7.28314e-07	8.06619	4.99517e-09
AT5G50915	-3.26139	1.77535e-34	1.40196	4.58882e-07	1.1206	0.00284712	1.75252	1.80181e-11	2.25347	1.46648e-15
AT5G66580	-1.36909	3.52591e-10	2.31132	2.18348e-35	1.98338	8.06978e-19	3.45405	9.85794e-82	3.23177	1.03103e-54
AT5G66590	-2.89345	6.09578e-50	1.11623	1.62002e-09	1.3572	2.67792e-09	1.33544	4.43966e-14	2.46331	8.48212e-35
AT5G67430	-3.79513	5.34856e-07	1.45682	0.00118419	3.72068	4.48252e-05	1.99813	2.33155e-07	3.91222	2.67033e-06
AT2G46890	1.09441	1.01254e-10	-0.70795	0.0028738	-0.966352	6.867e-07	-0.853225	7.01011e-05	-1.60807	2.6052e-19
AT3G53960	3.99775	6.50092e-101	-1.25211	0.000123095	-0.777695	2.06867e-05	-1.66838	2.68081e-07	-0.906002	4.27266e-08
