# Supplementary material for: Apoplastic pH determines the hypocotyl response to auxin dosage and light
Source: Research Square preprint supplement (doi:10.21203/rs.3.rs-3625192/v1), 2023-12-19
Supplement: Supplementary file 2 [file 7f7334c5fc112c60766f22ec.xlsx]

## Sheet: Up-regulated  in darkness
Auxin up-regulated genes in the dark
D5.Up	annotate	Short_description	D50.Up	annotate.1	Short_description.1	D50/D5.Up	annotate.2	Short_description.2	Only.D5.Up	annotate.3	Short_description.3	Only.D50.Up	annotate.4	Short_description.4	Only.D50/D5.Up	annotate.5	Short_description.5	D5.Up.&.D50.Up	annotate.6	Short_description.6	D50.Up.&.D50/L5.Up	annotate.7	Short_description.7	D5.Up.&.D50.Up.&.D50/D5.Up	annotate.8	Short_description.8
AT1G01560	Mitogen-activated protein kinase 11 (EC 2.7.11.24) (AtMPK11) (MAP kinase 11) [MPK11] [F22L4.10]	MAP kinase 11	AT1G01070	WAT1-related protein At1g01070 [T25K16.7]	nodulin MtN21 /EamA-like transporter family protein	AT1G13245	Small polypeptide DEVIL 4 (Small polypeptide ROTUNDIFOLIA like 17) (Small polypeptide ROT-FOUR-LIKE 17) [DVL4] [RTFL17] [F3F19.27]	ROTUNDIFOLIA like 17	AT1G01560	Mitogen-activated protein kinase 11 (EC 2.7.11.24) (AtMPK11) (MAP kinase 11) [MPK11] [F22L4.10]	MAP kinase 11	AT1G01070	WAT1-related protein At1g01070 [T25K16.7]	nodulin MtN21 /EamA-like transporter family protein	AT3G56400			AT1G04240	Auxin-responsive protein IAA3 (Indoleacetic acid-induced protein 3) (Short hypocotyl) (Suppressor of HY2) [IAA3] [SHY2] [F19P19.32]	AUX/IAA transcriptional regulator family protein	AT1G68825	Small polypeptide DEVIL 5 (Small polypeptide ROTUNDIFOLIA like 15) (Small polypeptide ROT-FOUR-LIKE 15) [DVL5] [RTFL15] [F14K14] [T6L1]	ROTUNDIFOLIA like 15	AT1G13245	Small polypeptide DEVIL 4 (Small polypeptide ROTUNDIFOLIA like 17) (Small polypeptide ROT-FOUR-LIKE 17) [DVL4] [RTFL17] [F3F19.27]	ROTUNDIFOLIA like 17
AT1G04240	Auxin-responsive protein IAA3 (Indoleacetic acid-induced protein 3) (Short hypocotyl) (Suppressor of HY2) [IAA3] [SHY2] [F19P19.32]	AUX/IAA transcriptional regulator family protein	AT1G01210		DNA-directed RNA polymerase, subunit M, archaeal	AT1G14500		Ankyrin repeat family protein	AT1G10040		alpha/beta-Hydrolases superfamily protein	AT1G01210		DNA-directed RNA polymerase, subunit M, archaeal	AT5G01900	Probable WRKY transcription factor 62 (WRKY DNA-binding protein 62) [WRKY62] [T20L15.170]	WRKY DNA-binding protein 62	AT1G04550	Auxin-responsive protein IAA12 (Indoleacetic acid-induced protein 12) (Protein BODENLOS) [IAA12] [BDL] [T1G11.20]	AUX/IAA transcriptional regulator family protein	AT2G15490	UDP-glycosyltransferase 73B4 (EC 2.4.1.-) (Flavonol 3-O-glucosyltransferase UGT73B4) (EC 2.4.1.91) [UGT73B4] [F9O13.4]	UDP-glycosyltransferase 73B4	AT1G14500		Ankyrin repeat family protein
AT1G04550	Auxin-responsive protein IAA12 (Indoleacetic acid-induced protein 12) (Protein BODENLOS) [IAA12] [BDL] [T1G11.20]	AUX/IAA transcriptional regulator family protein	AT1G02850	Beta-glucosidase 11 precursor (EC 3.2.1.21) (AtBGLU11) [BGLU11] [F22D16.15]	beta glucosidase 11	AT1G15570	Cyclin-A2-3 (Cyc3c-At) (Cyclin-3c) (G2/mitotic-specific cyclin-A2-3) (CycA2;3) [CYCA2-3] [CYC3C] [T16N11.8]	CYCLIN A2;3	AT1G14630			AT1G02850	Beta-glucosidase 11 precursor (EC 3.2.1.21) (AtBGLU11) [BGLU11] [F22D16.15]	beta glucosidase 11				AT1G08040		Protein of unknown function (DUF707)	AT3G06490	Transcription factor MYB108 (Myb-related protein 108) (AtMYB108) (Protein BOTRYTIS-SUSCEPTIBLE 1) [MYB108] [BOS1] [F5E6.18]	myb domain protein 108	AT1G15570	Cyclin-A2-3 (Cyc3c-At) (Cyclin-3c) (G2/mitotic-specific cyclin-A2-3) (CycA2;3) [CYCA2-3] [CYC3C] [T16N11.8]	CYCLIN A2;3
AT1G08040		Protein of unknown function (DUF707)	AT1G03820			AT1G15580	Auxin-responsive protein IAA5 (Auxin-induced protein AUX2-27) (Indoleacetic acid-induced protein 5) [IAA5] [AUX2-27] [T16N11.9]	indole-3-acetic acid inducible 5	AT1G34160	Pentatricopeptide repeat-containing protein At1g34160 [PCMP-H68] [F12G12.2]	Tetratricopeptide repeat (TPR)-like superfamily protein	AT1G03820						AT1G09350	Galactinol synthase 3 (EC 2.4.1.123) (AtGolS3) (GolS-3) [GOLS3] [F14J9.1]	galactinol synthase 3	AT3G46190		TRAF-like family protein	AT1G15580	Auxin-responsive protein IAA5 (Auxin-induced protein AUX2-27) (Indoleacetic acid-induced protein 5) [IAA5] [AUX2-27] [T16N11.9]	indole-3-acetic acid inducible 5
AT1G09350	Galactinol synthase 3 (EC 2.4.1.123) (AtGolS3) (GolS-3) [GOLS3] [F14J9.1]	galactinol synthase 3	AT1G04100	Auxin-responsive protein IAA10 (Indoleacetic acid-induced protein 10) [IAA10] [F20D22.13]	indoleacetic acid-induced protein 10	AT1G23340		Protein of Unknown Function (DUF239)	AT1G60000		RNA-binding (RRM/RBD/RNP motifs) family protein	AT1G04100	Auxin-responsive protein IAA10 (Indoleacetic acid-induced protein 10) [IAA10] [F20D22.13]	indoleacetic acid-induced protein 10				AT1G11120			AT3G56790		RNA splicing factor-related	AT1G23340		Protein of Unknown Function (DUF239)
AT1G10040		alpha/beta-Hydrolases superfamily protein	AT1G04240	Auxin-responsive protein IAA3 (Indoleacetic acid-induced protein 3) (Short hypocotyl) (Suppressor of HY2) [IAA3] [SHY2] [F19P19.32]	AUX/IAA transcriptional regulator family protein	AT1G26945	Transcription factor PRE6 (Basic helix-loop-helix protein 163) (AtbHLH163) (bHLH 163) (Protein KIDARI) (Protein PACLOBUTRAZOL RESISTANCE 6) (bHLH transcription factor bHLH163) [PRE6] [BHLH163] [KDR] [T2P11]	basic helix-loop-helix (bHLH) DNA-binding superfamily protein	AT1G61190	Probable disease resistance protein At1g61190 [F11P17.9]	LRR and NB-ARC domains-containing disease resistance protein	AT1G04610	Probable indole-3-pyruvate monooxygenase YUCCA3 (EC 1.14.13.168) (Flavin-containing monooxygenase YUCCA3) [YUC3] [YUCCA3] [T1G11.14]	YUCCA 3				AT1G11125			AT5G22570	Probable WRKY transcription factor 38 (WRKY DNA-binding protein 38) [WRKY38] [MQJ16.11]	WRKY DNA-binding protein 38	AT1G26945	Transcription factor PRE6 (Basic helix-loop-helix protein 163) (AtbHLH163) (bHLH 163) (Protein KIDARI) (Protein PACLOBUTRAZOL RESISTANCE 6) (bHLH transcription factor bHLH163) [PRE6] [BHLH163] [KDR] [T2P11]	basic helix-loop-helix (bHLH) DNA-binding superfamily protein
AT1G11120			AT1G04550	Auxin-responsive protein IAA12 (Indoleacetic acid-induced protein 12) (Protein BODENLOS) [IAA12] [BDL] [T1G11.20]	AUX/IAA transcriptional regulator family protein	AT1G29290	Precursor of CEP14 precursor (PCEP14) [Contains: C-terminally encoded peptide 14 (CEP14)] [CEP14] [F28N24.30]		AT2G02450	NAC domain-containing protein 35 (ANAC035) (Protein LONG VEGETATIVE PHASE 1) (AtLOV1) [NAC035]	NAC domain containing protein 35	AT1G04778						AT1G11735		MIR171B; miRNA	AT5G50130		NAD(P)-binding Rossmann-fold superfamily protein	AT1G29290	Precursor of CEP14 precursor (PCEP14) [Contains: C-terminally encoded peptide 14 (CEP14)] [CEP14] [F28N24.30]
AT1G11125			AT1G04610	Probable indole-3-pyruvate monooxygenase YUCCA3 (EC 1.14.13.168) (Flavin-containing monooxygenase YUCCA3) [YUC3] [YUCCA3] [T1G11.14]	YUCCA 3	AT1G29420	SAUR61	SAUR-like auxin-responsive protein family	AT3G41768		rRNA	AT1G10460	Germin-like protein subfamily 1 member 1 precursor [GLP7] [T10O24.7]	germin-like protein 7				AT1G11740		ankyrin repeat family protein	AT5G52810	Protein SAR DEFICIENT 4 precursor (Ornithine cyclodeaminase-like protein) (AtOCD) [SARD4] [OCD] [MXC20.2]	NAD(P)-binding Rossmann-fold superfamily protein	AT1G29420	SAUR61	SAUR-like auxin-responsive protein family
AT1G11735		MIR171B; miRNA	AT1G04778			AT1G29430	SAUR62	SAUR-like auxin-responsive protein family	AT3G49890			AT1G10900	Phosphatidylinositol 4-phosphate 5-kinase 7 (EC 2.7.1.68) (AtPIP5K7) (1-phosphatidylinositol 4-phosphate kinase 7) (Diphosphoinositide kinase 7) (AtP5K2) (PtdIns(4)P-5-kinase 7) [PIP5K7] [P5K2] [T19D16.18]	Phosphatidylinositol-4-phosphate 5-kinase family protein				AT1G14185		Glucose-methanol-choline (GMC) oxidoreductase family protein				AT1G29430	SAUR62	SAUR-like auxin-responsive protein family
AT1G11740		ankyrin repeat family protein	AT1G08040		Protein of unknown function (DUF707)	AT1G29440	SAUR63	SAUR-like auxin-responsive protein family	AT4G04570	Cysteine-rich receptor-like protein kinase 40 precursor (EC 2.7.11.-) (Cysteine-rich RLK40) [CRK40] [F4H6.9]	cysteine-rich RLK (RECEPTOR-like protein kinase) 40	AT1G11000	MLO-like protein 4 (AtMlo4) [MLO4] [T19D16.26]	Seven transmembrane MLO family protein				AT1G18400	Transcription factor BEE 1 (Basic helix-loop-helix protein 44) (AtbHLH44) (bHLH 44) (Protein Brassinosteroid enhanced expression 1) (Transcription factor EN 77) (bHLH transcription factor bHLH044) [BEE1] [BHLH44] [EN77] [F15H18.11] [F15H18.16]	BR enhanced expression 1				AT1G29440	SAUR63	SAUR-like auxin-responsive protein family
AT1G13245	Small polypeptide DEVIL 4 (Small polypeptide ROTUNDIFOLIA like 17) (Small polypeptide ROT-FOUR-LIKE 17) [DVL4] [RTFL17] [F3F19.27]	ROTUNDIFOLIA like 17	AT1G09350	Galactinol synthase 3 (EC 2.4.1.123) (AtGolS3) (GolS-3) [GOLS3] [F14J9.1]	galactinol synthase 3	AT1G29450	SAUR64	SAUR-like auxin-responsive protein family	AT5G01840	Transcription repressor OFP1 (Ovate family protein 1) (AtOFP1) [OFP1] [T20L15.110]	ovate family protein 1	AT1G11410	G-type lectin S-receptor-like serine/threonine-protein kinase At1g11410 precursor (EC 2.7.11.1) [T23J18.8]	S-locus lectin protein kinase family protein				AT1G18670	Protein IMPAIRED IN BABA-INDUCED STERILITY 1 (EC 2.7.11.-) [IBS1] [F6A14.22]	Protein kinase superfamily protein				AT1G29450	SAUR64	SAUR-like auxin-responsive protein family
AT1G14185		Glucose-methanol-choline (GMC) oxidoreductase family protein	AT1G10460	Germin-like protein subfamily 1 member 1 precursor [GLP7] [T10O24.7]	germin-like protein 7	AT1G29460	SAUR65	SAUR-like auxin-responsive protein family	AT5G13930	Chalcone synthase (EC 2.3.1.74) (Naringenin-chalcone synthase) (Protein TRANSPARENT TESTA 4) [CHS] [TT4] [MAC12.11] [MAC12.14]	Chalcone and stilbene synthase family protein	AT1G12580		phosphoenolpyruvate carboxylase-related kinase 1				AT1G18835	Mini zinc finger protein 3 (AtMIF3) [MIF3] [F6A14]	mini zinc finger				AT1G29460	SAUR65	SAUR-like auxin-responsive protein family
AT1G14500		Ankyrin repeat family protein	AT1G10900	Phosphatidylinositol 4-phosphate 5-kinase 7 (EC 2.7.1.68) (AtPIP5K7) (1-phosphatidylinositol 4-phosphate kinase 7) (Diphosphoinositide kinase 7) (AtP5K2) (PtdIns(4)P-5-kinase 7) [PIP5K7] [P5K2] [T19D16.18]	Phosphatidylinositol-4-phosphate 5-kinase family protein	AT1G29465			ATCG00020	Photosystem II protein D1 precursor (EC 1.10.3.9) (PSII D1 protein) (Photosystem II Q(B) protein) [psbA]	photosystem II reaction center protein A	AT1G13430	Cytosolic sulfotransferase 9 (EC 2.8.2.-) (AtSOT9) (Sulfotransferase 4c) (AtST4b) [STO9] [ST4C] [F13B4.24]	sulfotransferase 4C				AT1G19050	Two-component response regulator ARR7 [ARR7] [F14D16.20]	response regulator 7				AT1G29465
AT1G14630			AT1G11000	MLO-like protein 4 (AtMlo4) [MLO4] [T19D16.26]	Seven transmembrane MLO family protein	AT1G29490	SAUR68	SAUR-like auxin-responsive protein family	ATCG00030			AT1G14190		Glucose-methanol-choline (GMC) oxidoreductase family protein				AT1G19220	Auxin response factor 19 (Auxin-responsive protein IAA22) [ARF19] [IAA22] [T29M8.9]	auxin response factor 19				AT1G29490	SAUR68	SAUR-like auxin-responsive protein family
AT1G15570	Cyclin-A2-3 (Cyc3c-At) (Cyclin-3c) (G2/mitotic-specific cyclin-A2-3) (CycA2;3) [CYCA2-3] [CYC3C] [T16N11.8]	CYCLIN A2;3	AT1G11120			AT1G29500	SAUR66	SAUR-like auxin-responsive protein family	ATCG00040	Maturase K (Intron maturase) [matK] [ycf14]	maturase K	AT1G14280	Protein PHYTOCHROME KINASE SUBSTRATE 2 [PKS2] [F14L17.4]	phytochrome kinase substrate 2				AT1G19230	Respiratory burst oxidase homolog protein E (EC 1.11.1.-) (EC 1.6.3.-) (NADPH oxidase RBOHE) (AtRBOHE) [RBOHE] [T29M8.10]	Riboflavin synthase-like superfamily protein				AT1G29500	SAUR66	SAUR-like auxin-responsive protein family
AT1G15580	Auxin-responsive protein IAA5 (Auxin-induced protein AUX2-27) (Indoleacetic acid-induced protein 5) [IAA5] [AUX2-27] [T16N11.9]	indole-3-acetic acid inducible 5	AT1G11125			AT1G29510	SAUR67	SAUR-like auxin-responsive protein family	ATCG00065	30S ribosomal protein S12, chloroplastic [rps12-A] [rps12A/rps12B] [ATCG00065/ATCG01230]	ribosomal protein S12A	AT1G14390	Probable LRR receptor-like serine/threonine-protein kinase At1g14390 precursor (EC 2.7.11.1) [F14L17.16]	Leucine-rich repeat protein kinase family protein				AT1G20020	Ferredoxin--NADP reductase, leaf isozyme 2, chloroplastic precursor (EC 1.18.1.2) (Leaf FNR 2) (AtLFNR2) (FNR-2) [LFNR2] [PETH2] [T20H2.20]	ferredoxin-NADP(+)-oxidoreductase 2				AT1G29510	SAUR67	SAUR-like auxin-responsive protein family
AT1G18400	Transcription factor BEE 1 (Basic helix-loop-helix protein 44) (AtbHLH44) (bHLH 44) (Protein Brassinosteroid enhanced expression 1) (Transcription factor EN 77) (bHLH transcription factor bHLH044) [BEE1] [BHLH44] [EN77] [F15H18.11] [F15H18.16]	BR enhanced expression 1	AT1G11410	G-type lectin S-receptor-like serine/threonine-protein kinase At1g11410 precursor (EC 2.7.11.1) [T23J18.8]	S-locus lectin protein kinase family protein	AT1G30100	Probable 9-cis-epoxycarotenoid dioxygenase NCED5, chloroplastic precursor (EC 1.13.11.51) (AtNCED5) [NCED5] [T2H7.10]	nine-cis-epoxycarotenoid dioxygenase 5	ATCG00100			AT1G15600						AT1G21460	Bidirectional sugar transporter SWEET1 (AtSWEET1) (Protein SUGARS WILL EVENTUALLY BE EXPORTED TRANSPORTERS 1) [SWEET1] [F24J8.9]	Nodulin MtN3 family protein				AT1G30100	Probable 9-cis-epoxycarotenoid dioxygenase NCED5, chloroplastic precursor (EC 1.13.11.51) (AtNCED5) [NCED5] [T2H7.10]	nine-cis-epoxycarotenoid dioxygenase 5
AT1G18670	Protein IMPAIRED IN BABA-INDUCED STERILITY 1 (EC 2.7.11.-) [IBS1] [F6A14.22]	Protein kinase superfamily protein	AT1G11735		MIR171B; miRNA	AT1G31880	Protein BREVIS RADIX (AtBRX) [BRX] [F5M6.11]	DZC (Disease resistance/zinc finger/chromosome condensation-like region) domain containing protein	ATCG00110			AT1G15760		Sterile alpha motif (SAM) domain-containing protein				AT1G21980	Phosphatidylinositol 4-phosphate 5-kinase 1 (EC 2.7.1.68) (AtPIP5K1) (1-phosphatidylinositol 4-phosphate kinase 1) (Diphosphoinositide kinase 1) (PtdIns(4)P-5-kinase 1)[PIP5K1] [P5K1] [F2E2.1]	phosphatidylinositol-4-phosphate 5-kinase 1				AT1G31880	Protein BREVIS RADIX (AtBRX) [BRX] [F5M6.11]	DZC (Disease resistance/zinc finger/chromosome condensation-like region) domain containing protein
AT1G18835	Mini zinc finger protein 3 (AtMIF3) [MIF3] [F6A14]	mini zinc finger	AT1G11740		ankyrin repeat family protein	AT1G52830	Auxin-responsive protein IAA6 (Indoleacetic acid-induced protein 6) [IAA6] [SHY1] [F14G24.10]	indole-3-acetic acid 6	ATCG00120	ATP synthase subunit alpha, chloroplastic (EC 7.1.2.2) (ATP synthase F1 sector subunit alpha) (F-ATPase subunit alpha) [atpA]	ATP synthase subunit alpha	AT1G20030		Pathogenesis-related thaumatin superfamily protein				AT1G21990	Putative F-box protein At1g21990 [F2E2.2]	F-box/RNI-like/FBD-like domains-containing protein				AT1G52830	Auxin-responsive protein IAA6 (Indoleacetic acid-induced protein 6) [IAA6] [SHY1] [F14G24.10]	indole-3-acetic acid 6
AT1G19050	Two-component response regulator ARR7 [ARR7] [F14D16.20]	response regulator 7	AT1G12580		phosphoenolpyruvate carboxylase-related kinase 1	AT1G53163			ATCG00130	ATP synthase subunit b, chloroplastic (ATP synthase F(0) sector subunit b) (ATPase subunit I) [atpF]	ATPase, F0 complex, subunit B/B', bacterial/chloroplast	AT1G20490	4-coumarate--CoA ligase-like 3 (EC 6.2.1.-) [4CLL3] [F5M15.30]	AMP-dependent synthetase and ligase family protein				AT1G22710	Sucrose transport protein SUC2 (Sucrose permease 2) (Sucrose transporter 1) (Sucrose-proton symporter 2) [SUC2] [SUT1] [T22J18.12]	sucrose-proton symporter 2				AT1G53163
AT1G19220	Auxin response factor 19 (Auxin-responsive protein IAA22) [ARF19] [IAA22] [T29M8.9]	auxin response factor 19	AT1G13245	Small polypeptide DEVIL 4 (Small polypeptide ROTUNDIFOLIA like 17) (Small polypeptide ROT-FOUR-LIKE 17) [DVL4] [RTFL17] [F3F19.27]	ROTUNDIFOLIA like 17	AT1G68825	Small polypeptide DEVIL 5 (Small polypeptide ROTUNDIFOLIA like 15) (Small polypeptide ROT-FOUR-LIKE 15) [DVL5] [RTFL15] [F14K14] [T6L1]	ROTUNDIFOLIA like 15	ATCG00140	ATP synthase subunit c, chloroplastic (ATP synthase F(0) sector subunit c) (ATPase subunit III) (F-type ATPase subunit c) (F-ATPase subunit c) (Lipid-binding protein) [atpH]	ATP synthase subunit C family protein	AT1G26960	Homeobox-leucine zipper protein ATHB-23 (HD-ZIP protein ATHB-23) (Homeodomain transcription factor ATHB-23) [ATHB-23] [T2P11.15]	homeobox protein 23				AT1G23080	Auxin efflux carrier component 7 (AtPIN7) [PIN7] [AEH1] [T26J12.14]	Auxin efflux carrier family protein				AT1G71380	Endoglucanase 9 precursor (EC 3.2.1.4) (Cellulase 3) (AtCEL3) (Endo-1,4-beta glucanase 9) [CEL3] [F26A9.24]	cellulase 3
AT1G19230	Respiratory burst oxidase homolog protein E (EC 1.11.1.-) (EC 1.6.3.-) (NADPH oxidase RBOHE) (AtRBOHE) [RBOHE] [T29M8.10]	Riboflavin synthase-like superfamily protein	AT1G13430	Cytosolic sulfotransferase 9 (EC 2.8.2.-) (AtSOT9) (Sulfotransferase 4c) (AtST4b) [STO9] [ST4C] [F13B4.24]	sulfotransferase 4C	AT1G71380	Endoglucanase 9 precursor (EC 3.2.1.4) (Cellulase 3) (AtCEL3) (Endo-1,4-beta glucanase 9) [CEL3] [F26A9.24]	cellulase 3	ATCG00150	ATP synthase subunit a, chloroplastic (ATP synthase F0 sector subunit a) (F-ATPase subunit IV) [atpI]	ATPase, F0 complex, subunit A protein	AT1G28650	GDSL esterase/lipase At1g28650 precursor (EC 3.1.1.-) (Extracellular lipase At1g28650) [F1K23.13]	GDSL-like Lipase/Acylhydrolase superfamily protein				AT1G23350		Plant invertase/pectin methylesterase inhibitor superfamily protein				AT1G73590	Auxin efflux carrier component 1 (Protein PIN-FORMED) (AtPIN1) [PIN1] [F6D5.2]	Auxin efflux carrier family protein
AT1G20020	Ferredoxin--NADP reductase, leaf isozyme 2, chloroplastic precursor (EC 1.18.1.2) (Leaf FNR 2) (AtLFNR2) (FNR-2) [LFNR2] [PETH2] [T20H2.20]	ferredoxin-NADP(+)-oxidoreductase 2	AT1G14185		Glucose-methanol-choline (GMC) oxidoreductase family protein	AT1G73590	Auxin efflux carrier component 1 (Protein PIN-FORMED) (AtPIN1) [PIN1] [F6D5.2]	Auxin efflux carrier family protein	ATCG00160	30S ribosomal protein S2, chloroplastic [rps2]	ribosomal protein S2	AT1G28680		HXXXD-type acyl-transferase family protein				AT1G23510						AT1G74110		cytochrome P450, family 78, subfamily A, polypeptide 10
AT1G21460	Bidirectional sugar transporter SWEET1 (AtSWEET1) (Protein SUGARS WILL EVENTUALLY BE EXPORTED TRANSPORTERS 1) [SWEET1] [F24J8.9]	Nodulin MtN3 family protein	AT1G14190		Glucose-methanol-choline (GMC) oxidoreductase family protein	AT1G74110		cytochrome P450, family 78, subfamily A, polypeptide 10	ATCG00170	DNA-directed RNA polymerase subunit beta'' (EC 2.7.7.6) (PEP) (Plastid-encoded RNA polymerase subunit beta'') (RNA polymerase subunit beta'') [rpoC2]	DNA-directed RNA polymerase family protein	AT1G29280	Probable WRKY transcription factor 65 (WRKY DNA-binding protein 65) [WRKY65] [F28N24.4]	WRKY DNA-binding protein 65				AT1G25425	CLAVATA3/ESR (CLE)-related protein 43 precursor [Contains: CLE43p] [CLE43] [F2J7]	CLAVATA3/ESR-RELATED 43				AT2G01430	Homeobox-leucine zipper protein ATHB-17 (HD-ZIP protein ATHB-17) (Homeodomain transcription factor ATHB-17) [ATHB-17] [F2I9.5]	homeobox-leucine zipper protein 17
AT1G21980	Phosphatidylinositol 4-phosphate 5-kinase 1 (EC 2.7.1.68) (AtPIP5K1) (1-phosphatidylinositol 4-phosphate kinase 1) (Diphosphoinositide kinase 1) (PtdIns(4)P-5-kinase 1)[PIP5K1] [P5K1] [F2E2.1]	phosphatidylinositol-4-phosphate 5-kinase 1	AT1G14280	Protein PHYTOCHROME KINASE SUBSTRATE 2 [PKS2] [F14L17.4]	phytochrome kinase substrate 2	AT2G01430	Homeobox-leucine zipper protein ATHB-17 (HD-ZIP protein ATHB-17) (Homeodomain transcription factor ATHB-17) [ATHB-17] [F2I9.5]	homeobox-leucine zipper protein 17	ATCG00180	DNA-directed RNA polymerase subunit beta' (EC 2.7.7.6) (PEP) (Plastid-encoded RNA polymerase subunit beta') (RNA polymerase subunit beta') [rpoC1]	DNA-directed RNA polymerase family protein	AT1G29300		Plant protein of unknown function (DUF641)				AT1G29660	GDSL esterase/lipase At1g29660 precursor (EC 3.1.1.-) (Apoplastic EDS1-dependent protein 3) (Extracellular lipase At1g29660) [F15D2.21]	GDSL-like Lipase/Acylhydrolase superfamily protein				AT2G14960	Probable indole-3-acetic acid-amido synthetase GH3.1 (EC 6.3.2.-) (Auxin-responsive GH3-like protein 1) (AtGH3-1) [GH3.1] [T26I20.12]	Auxin-responsive GH3 family protein
AT1G21990	Putative F-box protein At1g21990 [F2E2.2]	F-box/RNI-like/FBD-like domains-containing protein	AT1G14390	Probable LRR receptor-like serine/threonine-protein kinase At1g14390 precursor (EC 2.7.11.1) [F14L17.16]	Leucine-rich repeat protein kinase family protein	AT2G14960	Probable indole-3-acetic acid-amido synthetase GH3.1 (EC 6.3.2.-) (Auxin-responsive GH3-like protein 1) (AtGH3-1) [GH3.1] [T26I20.12]	Auxin-responsive GH3 family protein	ATCG00190	DNA-directed RNA polymerase subunit beta (EC 2.7.7.6) (PEP) (Plastid-encoded RNA polymerase subunit beta) (RNA polymerase subunit beta) [rpoB]	RNA polymerase subunit beta	AT1G30190						AT1G30820		CTP synthase family protein				AT2G18010	SAUR10	SAUR-like auxin-responsive protein family
AT1G22710	Sucrose transport protein SUC2 (Sucrose permease 2) (Sucrose transporter 1) (Sucrose-proton symporter 2) [SUC2] [SUT1] [T22J18.12]	sucrose-proton symporter 2	AT1G14500		Ankyrin repeat family protein	AT2G15490	UDP-glycosyltransferase 73B4 (EC 2.4.1.-) (Flavonol 3-O-glucosyltransferase UGT73B4) (EC 2.4.1.91) [UGT73B4] [F9O13.4]	UDP-glycosyltransferase 73B4	ATCG00270	Photosystem II D2 protein (EC 1.10.3.9) (PSII D2 protein) (Photosystem Q(A) protein) [psbD]	photosystem II reaction center protein D	AT1G34110	LRR receptor-like serine/threonine-protein kinase RGI5 precursor (EC 2.7.11.1) (Protein RECEPTOR OF RGF1 5) (Protein RGF1 INSENSITIVE 5) [RGI5] [RGFR5] [F12G12.7]	Leucine-rich receptor-like protein kinase family protein				AT1G31120	Potassium transporter 10 (AtPOT10) [POT10] [KUP10] [F28K20.5]	K+ uptake permease 10				AT2G22810	1-aminocyclopropane-1-carboxylate synthase 4 (EC 4.4.1.14) (ACC synthase 4) (S-adenosyl-L-methionine methylthioadenosine-lyase 4) [ACS4] [ACC4] [T20K9.2]	1-aminocyclopropane-1-carboxylate synthase 4
AT1G23080	Auxin efflux carrier component 7 (AtPIN7) [PIN7] [AEH1] [T26J12.14]	Auxin efflux carrier family protein	AT1G15570	Cyclin-A2-3 (Cyc3c-At) (Cyclin-3c) (G2/mitotic-specific cyclin-A2-3) (CycA2;3) [CYCA2-3] [CYC3C] [T16N11.8]	CYCLIN A2;3	AT2G18010	SAUR10	SAUR-like auxin-responsive protein family	ATCG00280	Photosystem II CP43 reaction center protein precursor (PSII 43 kDa protein) (Protein CP-43) [psbC] [CP43]	photosystem II reaction center protein C	AT1G34670	Transcription factor MYB93 (Myb-related protein 93) (AtMYB93) [MYB93] [F21H2.9]	myb domain protein 93				AT1G31173		MIR167D; miRNA				AT2G23170	Indole-3-acetic acid-amido synthetase GH3.3 (EC 6.3.2.-) (Auxin-responsive GH3-like protein 3) (AtGH3-3) [GH3.3] [T20D16.20]	Auxin-responsive GH3 family protein
AT1G23340		Protein of Unknown Function (DUF239)	AT1G15580	Auxin-responsive protein IAA5 (Auxin-induced protein AUX2-27) (Indoleacetic acid-induced protein 5) [IAA5] [AUX2-27] [T16N11.9]	indole-3-acetic acid inducible 5	AT2G22810	1-aminocyclopropane-1-carboxylate synthase 4 (EC 4.4.1.14) (ACC synthase 4) (S-adenosyl-L-methionine methylthioadenosine-lyase 4) [ACS4] [ACC4] [T20K9.2]	1-aminocyclopropane-1-carboxylate synthase 4	ATCG00330	30S ribosomal protein S14, chloroplastic [rps14]	chloroplast ribosomal protein S14	AT1G35310	MLP-like protein 168 [MLP168] [T9I1.8]	MLP-like protein 168				AT1G31320	LOB domain-containing protein 4 (ASYMMETRIC LEAVES 2-like protein 6) (AS2-like protein 6) [LBD4] [ASL6] [T19E23.11]	LOB domain-containing protein 4				AT2G26710	Cytochrome P450 734A1 (EC 1.14.-.-) (Protein PHYB ACTIVATION-TAGGED SUPPRESSOR 1) [CYP734A1] [BAS1] [F18A8.8]	Cytochrome P450 superfamily protein
AT1G23350		Plant invertase/pectin methylesterase inhibitor superfamily protein	AT1G15600			AT2G23170	Indole-3-acetic acid-amido synthetase GH3.3 (EC 6.3.2.-) (Auxin-responsive GH3-like protein 3) (AtGH3-3) [GH3.3] [T20D16.20]	Auxin-responsive GH3 family protein	ATCG00340	Photosystem I P700 chlorophyll a apoprotein A2 (EC 1.97.1.12) (PSI-B) (PsaB) [psaB]	Photosystem I, PsaA/PsaB protein	AT1G35612		transposable element gene				AT1G32190		alpha/beta-Hydrolases superfamily protein				AT2G39370	Probable membrane-associated kinase regulator 4 [MAKR4] [F12L6.3]
AT1G23510			AT1G15760		Sterile alpha motif (SAM) domain-containing protein	AT2G26710	Cytochrome P450 734A1 (EC 1.14.-.-) (Protein PHYB ACTIVATION-TAGGED SUPPRESSOR 1) [CYP734A1] [BAS1] [F18A8.8]	Cytochrome P450 superfamily protein	ATCG00350	Photosystem I P700 chlorophyll a apoprotein A1 (EC 1.97.1.12) (PSI-A) (PsaA) [psaA]	Photosystem I, PsaA/PsaB protein	AT1G44050		Cysteine/Histidine-rich C1 domain family protein				AT1G33790	Jacalin-related lectin 4 [JAL4] [F14M2.9]	jacalin lectin family protein				AT2G42380	Basic leucine zipper 34 (AtbZIP34) (bZIP protein 34) [BZIP34] [MHK10.10]	Basic-leucine zipper (bZIP) transcription factor family protein
AT1G25425	CLAVATA3/ESR (CLE)-related protein 43 precursor [Contains: CLE43p] [CLE43] [F2J7]	CLAVATA3/ESR-RELATED 43	AT1G18400	Transcription factor BEE 1 (Basic helix-loop-helix protein 44) (AtbHLH44) (bHLH 44) (Protein Brassinosteroid enhanced expression 1) (Transcription factor EN 77) (bHLH transcription factor bHLH044) [BEE1] [BHLH44] [EN77] [F15H18.11] [F15H18.16]	BR enhanced expression 1	AT2G39370	Probable membrane-associated kinase regulator 4 [MAKR4] [F12L6.3]		ATCG00360	Photosystem I assembly protein Ycf3 [ycf3]	Tetratricopeptide repeat (TPR)-like superfamily protein	AT1G47655	Dof zinc finger protein DOF1.6 (AtDOF1.6) [DOF1.6] [F16N3.5]	Dof-type zinc finger DNA-binding family protein				AT1G35250	Acyl-acyl carrier protein thioesterase ATL2, chloroplastic precursor (EC 3.1.2.-) (Acyl-ACP thioesterase ATL2) (Acyl-lipid thioesterase 2) [ALT2] [T9I1.4]	Thioesterase superfamily protein				AT2G44990	Carotenoid cleavage dioxygenase 7, chloroplastic precursor (AtCCD7) (AtNCED7) (Beta,beta-carotene 9',10'-oxygenase) (EC 1.13.11.68) (Protein MORE AXILLARY BRANCHING 3) (Protein MORE AXILLARY GROWTH 3) [CCD7] [MAX3] [NCED7] [T14P1.21]	carotenoid cleavage dioxygenase 7
AT1G26945	Transcription factor PRE6 (Basic helix-loop-helix protein 163) (AtbHLH163) (bHLH 163) (Protein KIDARI) (Protein PACLOBUTRAZOL RESISTANCE 6) (bHLH transcription factor bHLH163) [PRE6] [BHLH163] [KDR] [T2P11]	basic helix-loop-helix (bHLH) DNA-binding superfamily protein	AT1G18670	Protein IMPAIRED IN BABA-INDUCED STERILITY 1 (EC 2.7.11.-) [IBS1] [F6A14.22]	Protein kinase superfamily protein	AT2G42380	Basic leucine zipper 34 (AtbZIP34) (bZIP protein 34) [BZIP34] [MHK10.10]	Basic-leucine zipper (bZIP) transcription factor family protein	ATCG00380	30S ribosomal protein S4, chloroplastic [rps4]	chloroplast ribosomal protein S4	AT1G49390		2-oxoglutarate (2OG) and Fe(II)-dependent oxygenase superfamily protein				AT1G36940						AT3G03820	SAUR29	SAUR-like auxin-responsive protein family
AT1G29290	Precursor of CEP14 precursor (PCEP14) [Contains: C-terminally encoded peptide 14 (CEP14)] [CEP14] [F28N24.30]		AT1G18835	Mini zinc finger protein 3 (AtMIF3) [MIF3] [F6A14]	mini zinc finger	AT2G44990	Carotenoid cleavage dioxygenase 7, chloroplastic precursor (AtCCD7) (AtNCED7) (Beta,beta-carotene 9',10'-oxygenase) (EC 1.13.11.68) (Protein MORE AXILLARY BRANCHING 3) (Protein MORE AXILLARY GROWTH 3) [CCD7] [MAX3] [NCED7] [T14P1.21]	carotenoid cleavage dioxygenase 7	ATCG00400			AT1G52880	NAC domain-containing protein 18 (ANAC018) (Protein NAC-REGULATED SEED MORPHOLOGY 2) (Protein NO APICAL MERISTEM) (AtNAM) [NAC018] [NAM] [NARS2] [F14G24.15]	NAC (No Apical Meristem) domain transcriptional regulator superfamily protein				AT1G47860		transposable element gene				AT3G03830	SAUR28	SAUR-like auxin-responsive protein family
AT1G29420	SAUR61	SAUR-like auxin-responsive protein family	AT1G19050	Two-component response regulator ARR7 [ARR7] [F14D16.20]	response regulator 7	AT3G03820	SAUR29	SAUR-like auxin-responsive protein family	ATCG00430	NAD(P)H-quinone oxidoreductase subunit K, chloroplastic (EC 7.1.1.-) (NAD(P)H dehydrogenase subunit K) (NADH-plastoquinone oxidoreductase subunit K) [ndhK] [psbG]	photosystem II reaction center protein G	AT1G55580	Scarecrow-like protein 18 (AtSCL18) (GRAS family protein 7) (AtGRAS-7) (Protein LATERAL SUPPRESSOR) [SCL18] [LAS] [F20N2.1]	GRAS family transcription factor				AT1G49780	U-box domain-containing protein 26 (EC 2.3.2.27) (Plant U-box protein 26) (RING-type E3 ubiquitin transferase PUB26) [PUB26] [F14J22.1]	plant U-box 26				AT3G03840	SAUR27	SAUR-like auxin-responsive protein family
AT1G29430	SAUR62	SAUR-like auxin-responsive protein family	AT1G19220	Auxin response factor 19 (Auxin-responsive protein IAA22) [ARF19] [IAA22] [T29M8.9]	auxin response factor 19	AT3G03830	SAUR28	SAUR-like auxin-responsive protein family	ATCG00440	NAD(P)H-quinone oxidoreductase subunit 3, chloroplastic (EC 7.1.1.-) (NAD(P)H dehydrogenase subunit 3) (NADH-plastoquinone oxidoreductase subunit 3) [ndhC]	NADH:ubiquinone/plastoquinone oxidoreductase, chain 3 protein	AT1G55910	Zinc transporter 11 precursor (ZRT/IRT-like protein 11) [ZIP11] [F14J16.16]	zinc transporter 11 precursor				AT1G51170	Serine/threonine-protein kinase UCN (EC 2.7.11.1) (AGC serine/threonine-protein kinase subfamily 2 member 3) (Protein UNICORN) [UNC] [AGC2-3] [F11M15.3] [F23H24.1]	Protein kinase superfamily protein				AT3G03850	SAUR26	SAUR-like auxin-responsive protein family
AT1G29440	SAUR63	SAUR-like auxin-responsive protein family	AT1G19230	Respiratory burst oxidase homolog protein E (EC 1.11.1.-) (EC 1.6.3.-) (NADPH oxidase RBOHE) (AtRBOHE) [RBOHE] [T29M8.10]	Riboflavin synthase-like superfamily protein	AT3G03840	SAUR27	SAUR-like auxin-responsive protein family	ATCG00450			AT1G61480	G-type lectin S-receptor-like serine/threonine-protein kinase At1g61480 precursor (EC 2.7.11.1) [T1F9.2]	S-locus lectin protein kinase family protein				AT1G52565						AT3G06370	Sodium/hydrogen exchanger 3 (Na(+)/H(+) exchanger 3) (NHE-3) [NHX3] [F24P17.16]	sodium hydrogen exchanger 4
AT1G29450	SAUR64	SAUR-like auxin-responsive protein family	AT1G20020	Ferredoxin--NADP reductase, leaf isozyme 2, chloroplastic precursor (EC 1.18.1.2) (Leaf FNR 2) (AtLFNR2) (FNR-2) [LFNR2] [PETH2] [T20H2.20]	ferredoxin-NADP(+)-oxidoreductase 2	AT3G03850	SAUR26	SAUR-like auxin-responsive protein family	ATCG00470	ATP synthase epsilon chain, chloroplastic (ATP synthase F1 sector epsilon subunit) (F-ATPase epsilon subunit) [atpE]	ATP synthase epsilon chain	AT1G62440	Leucine-rich repeat extensin-like protein 2 precursor (AtLRX2) (LRR/EXTENSIN2) (Cell wall hydroxyproline-rich glycoprotein) [LRX2] [F24O1.18] [T3P18.1]	leucine-rich repeat/extensin 2				AT1G52855						AT3G15540	Auxin-responsive protein IAA19 (Indoleacetic acid-induced protein 19) (Protein MASSUGU 2) [IAA19] [MSG2] [MJK13.20]	indole-3-acetic acid inducible 19
AT1G29460	SAUR65	SAUR-like auxin-responsive protein family	AT1G20030		Pathogenesis-related thaumatin superfamily protein	AT3G06370	Sodium/hydrogen exchanger 3 (Na(+)/H(+) exchanger 3) (NHE-3) [NHX3] [F24P17.16]	sodium hydrogen exchanger 4	ATCG00480	ATP synthase subunit beta, chloroplastic (EC 7.1.2.2) (ATP synthase F1 sector subunit beta) (F-ATPase subunit beta) [atpB]	ATP synthase subunit beta	AT1G62700	NAC domain-containing protein 26 (ANAC026) (Protein VASCULAR RELATED NAC-DOMAIN 5) [NAC026] [VND5] [F23N19.6]	Arabidopsis NAC domain containing protein 26				AT1G54120						AT3G25900	Homocysteine S-methyltransferase 1 (EC 2.1.1.10) (S-methylmethionine:homocysteine methyltransferase 1) (AtHMT-1) (SMM:Hcy S-methyltransferase 1) [HMT-1] [MPE11.5] [MPE11.6]	Homocysteine S-methyltransferase family protein
AT1G29465			AT1G20490	4-coumarate--CoA ligase-like 3 (EC 6.2.1.-) [4CLL3] [F5M15.30]	AMP-dependent synthetase and ligase family protein	AT3G06490	Transcription factor MYB108 (Myb-related protein 108) (AtMYB108) (Protein BOTRYTIS-SUSCEPTIBLE 1) [MYB108] [BOS1] [F5E6.18]	myb domain protein 108	ATCG00490	Ribulose bisphosphate carboxylase large chain precursor (EC 4.1.1.39) (RuBisCO large subunit) [rbcL]	ribulose-bisphosphate carboxylases	AT1G62990	Homeobox protein knotted-1-like 7 (Protein IRREGULAR XYLEM 11) (Protein KNAT7) [KNAT7] [IRX11] [F16P17.16]	KNOTTED-like homeobox of Arabidopsis thaliana 7				AT1G58007						AT3G28420		Putative membrane lipoprotein
AT1G29490	SAUR68	SAUR-like auxin-responsive protein family	AT1G21460	Bidirectional sugar transporter SWEET1 (AtSWEET1) (Protein SUGARS WILL EVENTUALLY BE EXPORTED TRANSPORTERS 1) [SWEET1] [F24J8.9]	Nodulin MtN3 family protein	AT3G15540	Auxin-responsive protein IAA19 (Indoleacetic acid-induced protein 19) (Protein MASSUGU 2) [IAA19] [MSG2] [MJK13.20]	indole-3-acetic acid inducible 19	ATCG00500	Acetyl-coenzyme A carboxylase carboxyl transferase subunit beta, chloroplastic (EC 2.1.3.15) (ACCase subunit beta) (Acetyl-CoA carboxylase carboxyltransferase subunit beta) [accD]	acetyl-CoA carboxylase carboxyl transferase subunit beta	AT1G64625	Transcription factor bHLH157 (BHLH transcription factor epsilon) (bHLH epsilon) (Basic helix-loop-helix protein 157) (AtbHLH157) (bHLH 157) (LONESOME HIGHWAY-like protein 2) (bHLH transcription factor bHLH157) [BHLH157] [F1N19]	Serine/threonine-protein kinase WNK (With No Lysine)-related				AT1G58340	Protein DETOXIFICATION 48 (AtDTX48) (Multidrug and toxic compound extrusion protein 48) (MATE protein 48) (Protein ABNORMAL SHOOT 4) (Protein BUSH-AND-CHLOROTIC-DWARF 1)(Protein BCD1) (Protein ZRIZI) [DTX48] [ABS4] [BCD1] [ZF14] [ZRZ] [F19C14.5]	MATE efflux family protein				AT3G28455	CLAVATA3/ESR (CLE)-related protein 25 precursor [Contains: CLE25p] [CLE25] [MFJ20]	CLAVATA3/ESR-RELATED 25
AT1G29500	SAUR66	SAUR-like auxin-responsive protein family	AT1G21980	Phosphatidylinositol 4-phosphate 5-kinase 1 (EC 2.7.1.68) (AtPIP5K1) (1-phosphatidylinositol 4-phosphate kinase 1) (Diphosphoinositide kinase 1) (PtdIns(4)P-5-kinase 1)[PIP5K1] [P5K1] [F2E2.1]	phosphatidylinositol-4-phosphate 5-kinase 1	AT3G25900	Homocysteine S-methyltransferase 1 (EC 2.1.1.10) (S-methylmethionine:homocysteine methyltransferase 1) (AtHMT-1) (SMM:Hcy S-methyltransferase 1) [HMT-1] [MPE11.5] [MPE11.6]	Homocysteine S-methyltransferase family protein	ATCG00510	Photosystem I reaction center subunit VIII (PSI-I) [psaI]	photsystem I subunit I	AT1G64640		early nodulin-like protein 8				AT1G60010						AT3G42800	Protein BIG GRAIN 1-like C [T21C14.20]
AT1G29510	SAUR67	SAUR-like auxin-responsive protein family	AT1G21990	Putative F-box protein At1g21990 [F2E2.2]	F-box/RNI-like/FBD-like domains-containing protein	AT3G28420		Putative membrane lipoprotein	ATCG00520	Photosystem I assembly protein Ycf4 [ycf4]	unfolded protein binding	AT1G67340	F-box protein At1g67340 [F1N21.16]	HCP-like superfamily protein with MYND-type zinc finger				AT1G60020		transposable element gene				AT3G50800
AT1G29660	GDSL esterase/lipase At1g29660 precursor (EC 3.1.1.-) (Apoplastic EDS1-dependent protein 3) (Extracellular lipase At1g29660) [F15D2.21]	GDSL-like Lipase/Acylhydrolase superfamily protein	AT1G22710	Sucrose transport protein SUC2 (Sucrose permease 2) (Sucrose transporter 1) (Sucrose-proton symporter 2) [SUC2] [SUT1] [T22J18.12]	sucrose-proton symporter 2	AT3G28455	CLAVATA3/ESR (CLE)-related protein 25 precursor [Contains: CLE25p] [CLE25] [MFJ20]	CLAVATA3/ESR-RELATED 25	ATCG00530	Chloroplast envelope membrane protein [cemA] [ycf10]	CemA-like proton extrusion protein-related	AT1G68330						AT1G60630	Inactive leucine-rich repeat receptor-like serine/threonine-protein kinase At1g60630 precursor [F8A5.15]	Leucine-rich repeat protein kinase family protein				AT3G53450	Cytokinin riboside 5'-monophosphate phosphoribohydrolase LOG4 (EC 3.2.2.n1) (Protein LONELY GUY 4) [LOG4] [F4P12.150]	Putative lysine decarboxylase family protein
AT1G30100	Probable 9-cis-epoxycarotenoid dioxygenase NCED5, chloroplastic precursor (EC 1.13.11.51) (AtNCED5) [NCED5] [T2H7.10]	nine-cis-epoxycarotenoid dioxygenase 5	AT1G23080	Auxin efflux carrier component 7 (AtPIN7) [PIN7] [AEH1] [T26J12.14]	Auxin efflux carrier family protein	AT3G42800	Protein BIG GRAIN 1-like C [T21C14.20]		ATCG00540	Cytochrome f precursor [petA]	photosynthetic electron transfer A	AT1G68810	Transcription factor bHLH30 (Basic helix-loop-helix protein 30) (AtbHLH30) (bHLH 30) (Transcription factor EN 53) (bHLH transcription factor bHLH030) [BHLH30] [EN53] [F14K14.8] [T6L1.1]	basic helix-loop-helix (bHLH) DNA-binding superfamily protein				AT1G61255						AT3G58190	LOB domain-containing protein 29 (ASYMMETRIC LEAVES 2-like protein 16) (AS2-like protein 16) [LBD29] [ASL16] [F9D24.100]	lateral organ boundaries-domain 29
AT1G30820		CTP synthase family protein	AT1G23340		Protein of Unknown Function (DUF239)	AT3G46190		TRAF-like family protein	ATCG00630	Photosystem I reaction center subunit IX (PSI-J) [psaJ]	PSAJ	AT1G69570	Cyclic dof factor 5 (Dof zinc finger protein DOF1.10) (AtDOF1.10) (H-protein promoter-binding factor 2b) [CDF5] [DOF1.10] [HPPBF-2B] [F10D13.20] [F24J1.25]	Dof-type zinc finger DNA-binding family protein				AT1G63410	Protein LURP-one-related 4 [F2K11.21]	Protein of unknown function (DUF567)				AT3G60650	Root meristem growth factor 10 precursor (AtRGF10) (CLAVATA3/ESR (CLE)-related protein CLELn) (AtCLELn) (Nuclear CLE-Like protein) [Contains: CLELn] [RGF10] [CLELn] [T4C21.60]
AT1G31120	Potassium transporter 10 (AtPOT10) [POT10] [KUP10] [F28K20.5]	K+ uptake permease 10	AT1G23350		Plant invertase/pectin methylesterase inhibitor superfamily protein	AT3G50800			ATCG00640	50S ribosomal protein L33, chloroplastic [rpl33]	ribosomal protein L33	AT1G69790	Probable serine/threonine-protein kinase PBL18 (EC 2.7.11.1) (PBS1-like protein 18) [PBL18] [T6C23.1]	Protein kinase superfamily protein				AT1G63420		Arabidopsis thaliana protein of unknown function (DUF821)				AT3G62100	Auxin-responsive protein IAA30 (Indoleacetic acid-induced protein 30) [IAA30] [T17J13.60]	indole-3-acetic acid inducible 30
AT1G31173		MIR167D; miRNA	AT1G23510			AT3G53450	Cytokinin riboside 5'-monophosphate phosphoribohydrolase LOG4 (EC 3.2.2.n1) (Protein LONELY GUY 4) [LOG4] [F4P12.150]	Putative lysine decarboxylase family protein	ATCG00650	30S ribosomal protein S18, chloroplastic [rps18]	ribosomal protein S18	AT1G72125	Protein NRT1/ PTR FAMILY 5.13 (AtNPF5.13) (Nitrate transporter 1.16) [NPF5.13] [NRT1.16] [F28P5.2]	Major facilitator superfamily protein				AT1G64405						AT3G62110		Pectin lyase-like superfamily protein
AT1G31320	LOB domain-containing protein 4 (ASYMMETRIC LEAVES 2-like protein 6) (AS2-like protein 6) [LBD4] [ASL6] [T19E23.11]	LOB domain-containing protein 4	AT1G25425	CLAVATA3/ESR (CLE)-related protein 43 precursor [Contains: CLE43p] [CLE43] [F2J7]	CLAVATA3/ESR-RELATED 43	AT3G56400	Probable WRKY transcription factor 70 (WRKY DNA-binding protein 70) [WRKY70] [T5P19.50]	WRKY DNA-binding protein 70	ATCG00660	50S ribosomal protein L20, chloroplastic [rpl20]	ribosomal protein L20	AT1G72230		Cupredoxin superfamily protein				AT1G64710	Alcohol dehydrogenase-like 4 (EC 1.1.1.1) [F13O11.3]	GroES-like zinc-binding dehydrogenase family protein				AT3G63440	Cytokinin dehydrogenase 6 precursor (EC 1.5.99.12) (Cytokinin oxidase 6) (AtCKX6) (AtCKX7) (CKO6) [CKX6] [CKX7] [MAA21_70]	cytokinin oxidase/dehydrogenase 6
AT1G31880	Protein BREVIS RADIX (AtBRX) [BRX] [F5M6.11]	DZC (Disease resistance/zinc finger/chromosome condensation-like region) domain containing protein	AT1G26945	Transcription factor PRE6 (Basic helix-loop-helix protein 163) (AtbHLH163) (bHLH 163) (Protein KIDARI) (Protein PACLOBUTRAZOL RESISTANCE 6) (bHLH transcription factor bHLH163) [PRE6] [BHLH163] [KDR] [T2P11]	basic helix-loop-helix (bHLH) DNA-binding superfamily protein	AT3G56790		RNA splicing factor-related	ATCG00670	Chloroplastic ATP-dependent Clp protease proteolytic subunit 1 (EC 3.4.21.92) (Endopeptidase ClpP1) (pClpP) [clpP1] [ClpP]	plastid-encoded CLP P	AT1G73740		UDP-Glycosyltransferase superfamily protein				AT1G65840	Probable polyamine oxidase 4 (EC 1.5.3.16) (AtPAO4) (Amine oxidase 2) [PAO4] [F1E22.18]	polyamine oxidase 4				AT4G00050	Transcription factor UNE10 (Basic helix-loop-helix protein 16) (AtbHLH16) (bHLH 16) (Protein UNFERTILIZED EMBRYO SAC 10) (Transcription factor EN 108) (bHLH transcription factor bHLH016) [UNE10] [BHLH16] [EN108] [F6N15.11]	basic helix-loop-helix (bHLH) DNA-binding superfamily protein
AT1G32190		alpha/beta-Hydrolases superfamily protein	AT1G26960	Homeobox-leucine zipper protein ATHB-23 (HD-ZIP protein ATHB-23) (Homeodomain transcription factor ATHB-23) [ATHB-23] [T2P11.15]	homeobox protein 23	AT3G58190	LOB domain-containing protein 29 (ASYMMETRIC LEAVES 2-like protein 16) (AS2-like protein 16) [LBD29] [ASL16] [F9D24.100]	lateral organ boundaries-domain 29	ATCG00680	Photosystem II CP47 reaction center protein (PSII 47 kDa protein) (Protein CP-47) [psbB]	photosystem II reaction center protein B	AT1G75450	Cytokinin dehydrogenase 5 precursor (EC 1.5.99.12) (Cytokinin oxidase 5) (AtCKX5) (AtCKX6) (CKO5) [CKX5] [CKX6] [F1B16.2]	cytokinin oxidase 5				AT1G65920		Regulator of chromosome condensation (RCC1) family with FYVE zinc finger domain				AT4G13790	SAUR25	SAUR-like auxin-responsive protein family
AT1G33790	Jacalin-related lectin 4 [JAL4] [F14M2.9]	jacalin lectin family protein	AT1G28650	GDSL esterase/lipase At1g28650 precursor (EC 3.1.1.-) (Extracellular lipase At1g28650) [F1K23.13]	GDSL-like Lipase/Acylhydrolase superfamily protein	AT3G60650	Root meristem growth factor 10 precursor (AtRGF10) (CLAVATA3/ESR (CLE)-related protein CLELn) (AtCLELn) (Nuclear CLE-Like protein) [Contains: CLELn] [RGF10] [CLELn] [T4C21.60]		ATCG00690	Photosystem II reaction center protein T (PSII-T) [psbT] [ycf8]	photosystem II reaction center protein T	AT1G76220		Arabidopsis protein of unknown function (DUF241)				AT1G67265	Small polypeptide DEVIL 3 (Small polypeptide ROTUNDIFOLIA LIKE 21) (Small polypeptide ROT-FOUR-LIKE 21) [DVL3] [RTFL21] [F1N21]	ROTUNDIFOLIA like 21				AT4G14560	Auxin-responsive protein IAA1 (Indoleacetic acid-induced protein 1) [IAA1] [dl3320w] [FCAALL.409]	indole-3-acetic acid inducible
AT1G34160	Pentatricopeptide repeat-containing protein At1g34160 [PCMP-H68] [F12G12.2]	Tetratricopeptide repeat (TPR)-like superfamily protein	AT1G28680		HXXXD-type acyl-transferase family protein	AT3G62100	Auxin-responsive protein IAA30 (Indoleacetic acid-induced protein 30) [IAA30] [T17J13.60]	indole-3-acetic acid inducible 30	ATCG00720	Cytochrome b6 [petB]	photosynthetic electron transfer B	AT1G76240		Arabidopsis protein of unknown function (DUF241)				AT1G67400		ELMO/CED-12 family protein				AT4G17350		Plant protein of unknown function (DUF828) with plant pleckstrin homology-like region
AT1G35250	Acyl-acyl carrier protein thioesterase ATL2, chloroplastic precursor (EC 3.1.2.-) (Acyl-ACP thioesterase ATL2) (Acyl-lipid thioesterase 2) [ALT2] [T9I1.4]	Thioesterase superfamily protein	AT1G29280	Probable WRKY transcription factor 65 (WRKY DNA-binding protein 65) [WRKY65] [F28N24.4]	WRKY DNA-binding protein 65	AT3G62110		Pectin lyase-like superfamily protein	ATCG00730	Cytochrome b6-f complex subunit 4 (17 kDa polypeptide) [petD]	photosynthetic electron transfer D	AT1G77110	Auxin efflux carrier component 6 (AtPIN6) [PIN6] [F22K20.18]	Auxin efflux carrier family protein				AT1G67770		terminal EAR1-like 2				AT4G17460	Homeobox-leucine zipper protein HAT1 (Homeodomain-leucine zipper protein HAT1) (HD-ZIP protein 1) [HAT1] [dl4765w] [FCAALL.65]	Homeobox-leucine zipper protein 4 (HB-4) / HD-ZIP protein
AT1G36940			AT1G29290	Precursor of CEP14 precursor (PCEP14) [Contains: C-terminally encoded peptide 14 (CEP14)] [CEP14] [F28N24.30]		AT3G63440	Cytokinin dehydrogenase 6 precursor (EC 1.5.99.12) (Cytokinin oxidase 6) (AtCKX6) (AtCKX7) (CKO6) [CKX6] [CKX7] [MAA21_70]	cytokinin oxidase/dehydrogenase 6	ATCG00740	DNA-directed RNA polymerase subunit alpha (EC 2.7.7.6) (PEP) (Plastid-encoded RNA polymerase subunit alpha) (RNA polymerase subunit alpha) [rpoA]	RNA polymerase subunit alpha	AT1G78070		Transducin/WD40 repeat-like superfamily protein				AT1G67900	BTB/POZ domain-containing protein At1g67900 [T23K23.25]	Phototropic-responsive NPH3 family protein				AT4G28640	Auxin-responsive protein IAA11 (Indoleacetic acid-induced protein 11) [IAA11] [T5F17.90]	indole-3-acetic acid inducible 11
AT1G47860		transposable element gene	AT1G29300		Plant protein of unknown function (DUF641)	AT4G00050	Transcription factor UNE10 (Basic helix-loop-helix protein 16) (AtbHLH16) (bHLH 16) (Protein UNFERTILIZED EMBRYO SAC 10) (Transcription factor EN 108) (bHLH transcription factor bHLH016) [UNE10] [BHLH16] [EN108] [F6N15.11]	basic helix-loop-helix (bHLH) DNA-binding superfamily protein	ATCG00760	50S ribosomal protein L36, chloroplastic [rpl36]	ribosomal protein L36	AT1G78970	Lupeol synthase 1 (EC 4.2.1.128) (EC 5.4.99.41) (AtLUP1) (Lupan-3-beta,20-diol synthase) [LUP1] [YUP8H12R.28] [YUP8H12R.42]	lupeol synthase 1				AT1G68360	Zinc finger protein GIS3 (Protein GLABROUS INFLORESCENCE STEMS 3) [GIS3] [T22E19.1]	C2H2 and C2HC zinc fingers superfamily protein				AT4G32280	Auxin-responsive protein IAA29 (Indoleacetic acid-induced protein 29) [IAA29] [F10M6.80]	indole-3-acetic acid inducible 29
AT1G49780	U-box domain-containing protein 26 (EC 2.3.2.27) (Plant U-box protein 26) (RING-type E3 ubiquitin transferase PUB26) [PUB26] [F14J22.1]	plant U-box 26	AT1G29420	SAUR61	SAUR-like auxin-responsive protein family	AT4G13790	SAUR25	SAUR-like auxin-responsive protein family	ATCG00770	30S ribosomal protein S8, chloroplastic [rps8]	ribosomal protein S8	AT2G01200	Auxin-responsive protein IAA32 (Indoleacetic acid-induced protein 32) [IAA32] [F10A8.8]	indole-3-acetic acid inducible 32				AT1G68620	Probable carboxylesterase 6 (AtCXE6) (EC 3.1.1.1) [CXE6] [F24J5.14]	alpha/beta-Hydrolases superfamily protein				AT4G34760	SAUR50	SAUR-like auxin-responsive protein family
AT1G51170	Serine/threonine-protein kinase UCN (EC 2.7.11.1) (AGC serine/threonine-protein kinase subfamily 2 member 3) (Protein UNICORN) [UNC] [AGC2-3] [F11M15.3] [F23H24.1]	Protein kinase superfamily protein	AT1G29430	SAUR62	SAUR-like auxin-responsive protein family	AT4G14560	Auxin-responsive protein IAA1 (Indoleacetic acid-induced protein 1) [IAA1] [dl3320w] [FCAALL.409]	indole-3-acetic acid inducible	ATCG00780	50S ribosomal protein L14, chloroplastic [rpl14]	ribosomal protein L14	AT2G14820	BTB/POZ domain-containing protein NPY2 (Protein NAKED PINS IN YUC MUTANTS 2) [NPY2] [F26C24.4]	Phototropic-responsive NPH3 family protein				AT1G68880	Basic leucine zipper 8 (AtbZIP8) (bZIP protein 8) [BZIP8] [F14K14.1]	basic leucine-zipper 8				AT4G36110	SAUR9	SAUR-like auxin-responsive protein family
AT1G52565			AT1G29440	SAUR63	SAUR-like auxin-responsive protein family	AT4G17350		Plant protein of unknown function (DUF828) with plant pleckstrin homology-like region	ATCG00790	50S ribosomal protein L16, chloroplastic [rpl16]	ribosomal protein L16	AT2G15440		Protein of unknown function (DUF579)				AT1G70550		Protein of Unknown Function (DUF239)				AT4G37390	Indole-3-acetic acid-amido synthetase GH3.2 (EC 6.3.2.-) (Auxin-responsive GH3-like protein 2) (AtGH3-2) (Protein YADOKARI 1) [GH3.2] [BRU6] [CF4] [YDK1] [F6G17.40]	Auxin-responsive GH3 family protein
AT1G52830	Auxin-responsive protein IAA6 (Indoleacetic acid-induced protein 6) [IAA6] [SHY1] [F14G24.10]	indole-3-acetic acid 6	AT1G29450	SAUR64	SAUR-like auxin-responsive protein family	AT4G17460	Homeobox-leucine zipper protein HAT1 (Homeodomain-leucine zipper protein HAT1) (HD-ZIP protein 1) [HAT1] [dl4765w] [FCAALL.65]	Homeobox-leucine zipper protein 4 (HB-4) / HD-ZIP protein	ATCG00800	30S ribosomal protein S3, chloroplastic [rps3]	structural constituent of ribosome	AT2G17070		Arabidopsis protein of unknown function (DUF241)				AT1G70910		RING/U-box superfamily protein				AT4G37770	1-aminocyclopropane-1-carboxylate synthase 8 (EC 4.4.1.14) (ACC synthase 8) (S-adenosyl-L-methionine methylthioadenosine-lyase 8) [ACS8] [T28I19.50]	1-amino-cyclopropane-1-carboxylate synthase 8
AT1G52855			AT1G29460	SAUR65	SAUR-like auxin-responsive protein family	AT4G28640	Auxin-responsive protein IAA11 (Indoleacetic acid-induced protein 11) [IAA11] [T5F17.90]	indole-3-acetic acid inducible 11	ATCG00810	50S ribosomal protein L22, chloroplastic [rpl22]	ribosomal protein L22	AT2G17680		Arabidopsis protein of unknown function (DUF241)				AT1G70920	Homeobox-leucine zipper protein ATHB-X (HD-ZIP protein ATHB-X) (Homeodomain transcription factor ATHB-X) [ATHB-X] [F15H11_25]	homeobox-leucine zipper protein 18				AT4G38840	SAUR14	SAUR-like auxin-responsive protein family
AT1G53163			AT1G29465			AT4G32280	Auxin-responsive protein IAA29 (Indoleacetic acid-induced protein 29) [IAA29] [F10M6.80]	indole-3-acetic acid inducible 29	ATCG01010	NAD(P)H-quinone oxidoreductase subunit 5, chloroplastic (EC 7.1.1.-) (NAD(P)H dehydrogenase subunit 5) (NADH-plastoquinone oxidoreductase subunit 5) [ndhF]	NADH-Ubiquinone oxidoreductase (complex I), chain 5 protein	AT2G17770	bZIP transcription factor 27 (AtbZIP27) (Protein FD PARALOG) [FDP] [BZIP27] [T17A5.15]	basic region/leucine zipper motif 27				AT1G70940	Auxin efflux carrier component 3 (AtPIN3) [PIN3] [F15H11.14]	Auxin efflux carrier family protein				AT4G38850	SAUR15	SAUR-like auxin-responsive protein family
AT1G54120			AT1G29490	SAUR68	SAUR-like auxin-responsive protein family	AT4G34760	SAUR50	SAUR-like auxin-responsive protein family	ATCG01040	Cytochrome c biogenesis protein CcsA [ccsA]	Cytochrome C assembly protein	AT2G18480	Probable polyol transporter 3 [PLT3] [F24H14.17]	Major facilitator superfamily protein				AT1G72280	Endoplasmic reticulum oxidoreductin-1 precursor (EC 1.8.4.-) [AERO1] [ERO1] [T9N14.18]	endoplasmic reticulum oxidoreductins 1				AT5G04980	Type I inositol polyphosphate 5-phosphatase 10 (EC 3.1.3.-) (At5PTase10) [IP5P10] [MUG13.16]	DNAse I-like superfamily protein
AT1G58007			AT1G29500	SAUR66	SAUR-like auxin-responsive protein family	AT4G36110	SAUR9	SAUR-like auxin-responsive protein family	ATCG01050	NAD(P)H-quinone oxidoreductase chain 4, chloroplastic (EC 7.1.1.-) (NAD(P)H dehydrogenase, chain 4) (NADH-plastoquinone oxidoreductase chain 4) [ndhD]	NADH-Ubiquinone/plastoquinone (complex I) protein	AT2G19640	Histone-lysine N-methyltransferase ASHR2 (EC 2.1.1.-) (ASH1-related protein 2) (Protein SET DOMAIN GROUP 39) [ASHR2] [SDG39] [SET39] [F3P11.24]	ASH1-related protein 2				AT1G74420	Fucosyltransferase 3 (EC 2.4.1.-) (AtFUT3) [FUT3] [F1M20.10]	fucosyltransferase 3				AT5G18010	SAUR19	SAUR-like auxin-responsive protein family
AT1G58340	Protein DETOXIFICATION 48 (AtDTX48) (Multidrug and toxic compound extrusion protein 48) (MATE protein 48) (Protein ABNORMAL SHOOT 4) (Protein BUSH-AND-CHLOROTIC-DWARF 1)(Protein BCD1) (Protein ZRIZI) [DTX48] [ABS4] [BCD1] [ZF14] [ZRZ] [F19C14.5]	MATE efflux family protein	AT1G29510	SAUR67	SAUR-like auxin-responsive protein family	AT4G37390	Indole-3-acetic acid-amido synthetase GH3.2 (EC 6.3.2.-) (Auxin-responsive GH3-like protein 2) (AtGH3-2) (Protein YADOKARI 1) [GH3.2] [BRU6] [CF4] [YDK1] [F6G17.40]	Auxin-responsive GH3 family protein	ATCG01060	Photosystem I iron-sulfur center (EC 1.97.1.12) (9 kDa polypeptide) (PSI-C) (Photosystem I subunit VII) (PsaC) [psaC] [frxA]	iron-sulfur cluster binding;electron carriers;4 iron, 4 sulfur cluster binding	AT2G22680	E3 ubiquitin-protein ligase WAVH1 (EC 2.3.2.27) (Protein WAV3 homolog 1) (RING-type E3 ubiquitin transferase WAVH1) [WAVH1]	Zinc finger (C3HC4-type RING finger) family protein				AT1G74430		myb domain protein 95				AT5G18020	SAUR20	SAUR-like auxin-responsive protein family
AT1G60000		RNA-binding (RRM/RBD/RNP motifs) family protein	AT1G29660	GDSL esterase/lipase At1g29660 precursor (EC 3.1.1.-) (Apoplastic EDS1-dependent protein 3) (Extracellular lipase At1g29660) [F15D2.21]	GDSL-like Lipase/Acylhydrolase superfamily protein	AT4G37770	1-aminocyclopropane-1-carboxylate synthase 8 (EC 4.4.1.14) (ACC synthase 8) (S-adenosyl-L-methionine methylthioadenosine-lyase 8) [ACS8] [T28I19.50]	1-amino-cyclopropane-1-carboxylate synthase 8	ATCG01070	NAD(P)H-quinone oxidoreductase subunit 4L, chloroplastic (EC 7.1.1.-) (NAD(P)H dehydrogenase subunit 4L) (NADH-plastoquinone oxidoreductase subunit 4L) [ndhE]	NADH-ubiquinone/plastoquinone oxidoreductase chain 4L	AT2G22800	Homeobox-leucine zipper protein HAT9 (Homeodomain-leucine zipper protein HAT9) (HD-ZIP protein 9) [HAT9] [T20K9.1] [T30L20.6]	Homeobox-leucine zipper protein family				AT1G75490	Dehydration-responsive element-binding protein 2D (Protein DREB2D) [DREB2D] [ERF049] [F10A5.29]	Integrase-type DNA-binding superfamily protein				AT5G18030	SAUR21	SAUR-like auxin-responsive protein family
AT1G60010			AT1G30100	Probable 9-cis-epoxycarotenoid dioxygenase NCED5, chloroplastic precursor (EC 1.13.11.51) (AtNCED5) [NCED5] [T2H7.10]	nine-cis-epoxycarotenoid dioxygenase 5	AT4G38840	SAUR14	SAUR-like auxin-responsive protein family	ATCG01080	NAD(P)H-quinone oxidoreductase subunit 6, chloroplastic (EC 7.1.1.-) (NAD(P)H dehydrogenase subunit 6) (NADH-plastoquinone oxidoreductase subunit 6) [ndhG]	NADH:ubiquinone/plastoquinone oxidoreductase, chain 6	AT2G22821		other RNA				AT1G75500	Protein WALLS ARE THIN 1 [WAT1] [F10A5.28] [F1B16.19]	Walls Are Thin 1				AT5G18050	SAUR22	SAUR-like auxin-responsive protein family
AT1G60020		transposable element gene	AT1G30190			AT4G38850	SAUR15	SAUR-like auxin-responsive protein family	ATCG01090	NAD(P)H-quinone oxidoreductase subunit I, chloroplastic (EC 7.1.1.-) (NAD(P)H dehydrogenase subunit I) (NDH subunit I) (NADH-plastoquinone oxidoreductase subunit I) [ndhI]	NADPH dehydrogenases	AT2G25790	Leucine-rich repeat receptor-like serine/threonine-protein kinase SKM1 precursor (EC 2.7.11.1) (Protein STERILITY-REGULATING KINASE MEMBER 1) [SKM1] [F17H15.18]	Leucine-rich receptor-like protein kinase family protein				AT1G75640		Leucine-rich receptor-like protein kinase family protein				AT5G18060	SAUR23	SAUR-like auxin-responsive protein family
AT1G60630	Inactive leucine-rich repeat receptor-like serine/threonine-protein kinase At1g60630 precursor [F8A5.15]	Leucine-rich repeat protein kinase family protein	AT1G30820		CTP synthase family protein	AT5G01900	Probable WRKY transcription factor 62 (WRKY DNA-binding protein 62) [WRKY62] [T20L15.170]	WRKY DNA-binding protein 62	ATCG01100	NAD(P)H-quinone oxidoreductase subunit 1, chloroplastic (EC 7.1.1.-) (NAD(P)H dehydrogenase subunit 1) (NDH subunit 1) (NADH-plastoquinone oxidoreductase subunit 1) [ndhA]	NADH dehydrogenase family protein	AT2G26700	Protein kinase PINOID 2 (EC 2.7.11.1) (Protein kinase AGC1-10) [PID2] [AGC1-10] [F18A8.7]	AGC (cAMP-dependent, cGMP-dependent and protein kinase C) kinase family protein				AT1G76610		Protein of unknown function, DUF617				AT5G18070	Phosphoacetylglucosamine mutase (EC 5.4.2.3) (PAGM) (Acetylglucosamine phosphomutase) (DNA-damage-repair/toleration protein DRT101) (N-acetylglucosamine-phosphate mutase) [DRT101] [MRG7.2]	phosphoglucosamine mutase-related
AT1G61190	Probable disease resistance protein At1g61190 [F11P17.9]	LRR and NB-ARC domains-containing disease resistance protein	AT1G31120	Potassium transporter 10 (AtPOT10) [POT10] [KUP10] [F28K20.5]	K+ uptake permease 10	AT5G04980	Type I inositol polyphosphate 5-phosphatase 10 (EC 3.1.3.-) (At5PTase10) [IP5P10] [MUG13.16]	DNAse I-like superfamily protein	ATCG01110	NAD(P)H-quinone oxidoreductase subunit H, chloroplastic (EC 7.1.1.-) (NAD(P)H dehydrogenase subunit H) (NADH-plastoquinone oxidoreductase 49 kDa subunit) (NADH-plastoquinone oxidoreductase subunit H) [ndhH]	NAD(P)H dehydrogenase subunit H	AT2G27000		cytochrome P450, family 705, subfamily A, polypeptide 8				AT1G78100	F-box protein AUF1 (F-box protein At1g78100) (Protein AUXIN UP-REGULATED F-BOX PROTEIN 1) [AUF1] [T11I11.4]	F-box family protein				AT5G18080	SAUR24	SAUR-like auxin-responsive protein family
AT1G61255			AT1G31173		MIR167D; miRNA	AT5G18010	SAUR19	SAUR-like auxin-responsive protein family	ATCG01120	30S ribosomal protein S15, chloroplastic [rps15]	chloroplast ribosomal protein S15	AT2G28305	Cytokinin riboside 5'-monophosphate phosphoribohydrolase LOG1 (EC 3.2.2.n1) (Protein LONELY GUY 1) [LOG1] [T1B3.18] [T3B23.2]	Putative lysine decarboxylase family protein				AT1G78120		Tetratricopeptide repeat (TPR)-like superfamily protein				AT5G18930	S-adenosylmethionine decarboxylase proenzyme 4 precursor (EC 4.1.1.50) (AdoMetDC4) [Contains: S-adenosylmethionine decarboxylase 1 alpha chain; S-adenosylmethionine decarboxylase 1 beta chain (Protein BUSHY AND DWARF 2)] [SAMDC4] [BUD2]	Adenosylmethionine decarboxylase family protein
AT1G63410	Protein LURP-one-related 4 [F2K11.21]	Protein of unknown function (DUF567)	AT1G31320	LOB domain-containing protein 4 (ASYMMETRIC LEAVES 2-like protein 6) (AS2-like protein 6) [LBD4] [ASL6] [T19E23.11]	LOB domain-containing protein 4	AT5G18020	SAUR20	SAUR-like auxin-responsive protein family	ATCG01130	Protein TIC 214 (Translocon at the inner envelope membrane of chloroplasts 214) (AtTIC214) [TIC214] [ycf1-B]	Ycf1 protein	AT2G28460		Cysteine/Histidine-rich C1 domain family protein				AT1G79760		downstream target of AGL15-4				AT5G39860	Transcription factor PRE1 (Basic helix-loop-helix protein 136) (AtbHLH136) (bHLH 136) (Protein BANQUO 1) (Protein PACLOBUTRAZOL RESISTANCE 1) (bHLH transcription factorbHLH136) [PRE1] [BHLH136] [BNQ1] [MYH19.1]	basic helix-loop-helix (bHLH) DNA-binding family protein
AT1G63420		Arabidopsis thaliana protein of unknown function (DUF821)	AT1G31880	Protein BREVIS RADIX (AtBRX) [BRX] [F5M6.11]	DZC (Disease resistance/zinc finger/chromosome condensation-like region) domain containing protein	AT5G18030	SAUR21	SAUR-like auxin-responsive protein family	ATMG00070	NADH dehydrogenase [ubiquinone] iron-sulfur protein 3 (EC 7.1.1.2) (NADH dehydrogenase subunit 9) [NAD9]	NADH dehydrogenase subunit 9	AT2G29065	Scarecrow-like protein 34 (AtSCL34) (GRAS family protein 12) (AtGRAS-12) [SCL34] [T9I4.14]	GRAS family transcription factor				AT1G80240		Protein of unknown function, DUF642				AT5G43700	Auxin-responsive protein IAA4 (Auxin-induced protein AUX2-11) (Indoleacetic acid-induced protein 4) [IAA4] [AUX2-11] [MQD19.3]	AUX/IAA transcriptional regulator family protein
AT1G64405			AT1G32190		alpha/beta-Hydrolases superfamily protein	AT5G18050	SAUR22	SAUR-like auxin-responsive protein family	ATMG00080	60S ribosomal protein L16, mitochondrial [RPL16]	ribosomal protein L16	AT2G29440	Glutathione S-transferase U6 (EC 2.5.1.18) (AtGSTU6) (GST class-tau member 6) (Glutathione S-transferase 24) [GSTU6] [GST24] [F16P2.18]	glutathione S-transferase tau 6				AT2G03830	Protein GOLVEN 6 precursor (CLAVATA3/ESR (CLE)-related protein CLEL2) (CLE-Like protein 2) (Root meristem growth factor 8) (AtRGF8) [Contains: GLV6p] [GLV6] [CLEL2] [RGF8] [T18C20.3]					AT5G46240	Potassium channel KAT1 [KAT1] [MPL12.2]	potassium channel in Arabidopsis thaliana 1
AT1G64710	Alcohol dehydrogenase-like 4 (EC 1.1.1.1) [F13O11.3]	GroES-like zinc-binding dehydrogenase family protein	AT1G33790	Jacalin-related lectin 4 [JAL4] [F14M2.9]	jacalin lectin family protein	AT5G18060	SAUR23	SAUR-like auxin-responsive protein family				AT2G30010	Protein trichome birefringence-like 45 [TBL45] [F23F1.7]	TRICHOME BIREFRINGENCE-LIKE 45				AT2G04038		basic leucine-zipper 48				AT5G47370	Homeobox-leucine zipper protein HAT2 (Homeodomain-leucine zipper protein HAT2) (HD-ZIP protein 2) [HAT2] [MQL5.23]	Homeobox-leucine zipper protein 4 (HB-4) / HD-ZIP protein
AT1G65840	Probable polyamine oxidase 4 (EC 1.5.3.16) (AtPAO4) (Amine oxidase 2) [PAO4] [F1E22.18]	polyamine oxidase 4	AT1G34110	LRR receptor-like serine/threonine-protein kinase RGI5 precursor (EC 2.7.11.1) (Protein RECEPTOR OF RGF1 5) (Protein RGF1 INSENSITIVE 5) [RGI5] [RGFR5] [F12G12.7]	Leucine-rich receptor-like protein kinase family protein	AT5G18070	Phosphoacetylglucosamine mutase (EC 5.4.2.3) (PAGM) (Acetylglucosamine phosphomutase) (DNA-damage-repair/toleration protein DRT101) (N-acetylglucosamine-phosphate mutase) [DRT101] [MRG7.2]	phosphoglucosamine mutase-related				AT2G31280	Transcription factor bHLH155 (BHLH transcription factor gamma) (bHLH gamma) (Basic helix-loop-helix protein 155) (AtbHLH155) (bHLH 155) (LONESOME HIGHWAY-like protein 3)(bHLH transcription factor bHLH155) [BHLH155] [F16D14.12]	conserved peptide upstream open reading frame 7				AT2G13810	Aminotransferase ALD1, chloroplastic precursor (EC 2.6.1.-) (AGD2-like defense response protein 1) [ALD1] [F13J11.16]	AGD2-like defense response protein 1				AT5G50090
AT1G65920		Regulator of chromosome condensation (RCC1) family with FYVE zinc finger domain	AT1G34670	Transcription factor MYB93 (Myb-related protein 93) (AtMYB93) [MYB93] [F21H2.9]	myb domain protein 93	AT5G18080	SAUR24	SAUR-like auxin-responsive protein family				AT2G32100	Transcription repressor OFP16 (Ovate family protein 16) (AtOFP16) [OFP16] [F22D22.15]	ovate family protein 16				AT2G17080		Arabidopsis protein of unknown function (DUF241)				AT5G53290	Ethylene-responsive transcription factor CRF3 (Protein CYTOKININ RESPONSE FACTOR 3) [CRF3] [ERF065] [K19E1.9]	cytokinin response factor 3
AT1G67265	Small polypeptide DEVIL 3 (Small polypeptide ROTUNDIFOLIA LIKE 21) (Small polypeptide ROT-FOUR-LIKE 21) [DVL3] [RTFL21] [F1N21]	ROTUNDIFOLIA like 21	AT1G35250	Acyl-acyl carrier protein thioesterase ATL2, chloroplastic precursor (EC 3.1.2.-) (Acyl-ACP thioesterase ATL2) (Acyl-lipid thioesterase 2) [ALT2] [T9I1.4]	Thioesterase superfamily protein	AT5G18930	S-adenosylmethionine decarboxylase proenzyme 4 precursor (EC 4.1.1.50) (AdoMetDC4) [Contains: S-adenosylmethionine decarboxylase 1 alpha chain; S-adenosylmethionine decarboxylase 1 beta chain (Protein BUSHY AND DWARF 2)] [SAMDC4] [BUD2]	Adenosylmethionine decarboxylase family protein				AT2G32280		Protein of unknown function (DUF1218)				AT2G21050	Auxin transporter-like protein 2 (AUX1-like protein 2) [LAX2] [F26H11.19]	like AUXIN RESISTANT 2				AT5G64770	Protein GOLVEN 2 precursor (CLAVATA3/ESR (CLE)-related protein CLEL9) (CLE-Like protein 9) (Root meristem growth factor 9) (AtRGF9) [Contains: GLV2p] [GLV2] [CLEL9] [RGF9] [MVP7.10]
AT1G67400		ELMO/CED-12 family protein	AT1G35310	MLP-like protein 168 [MLP168] [T9I1.8]	MLP-like protein 168	AT5G22570	Probable WRKY transcription factor 38 (WRKY DNA-binding protein 38) [WRKY38] [MQJ16.11]	WRKY DNA-binding protein 38				AT2G33680	Pentatricopeptide repeat-containing protein At2g33680 [PCMP-E19] [T1B8.1]	Tetratricopeptide repeat (TPR)-like superfamily protein				AT2G21195						AT5G66580
AT1G67770		terminal EAR1-like 2	AT1G35612		transposable element gene	AT5G39860	Transcription factor PRE1 (Basic helix-loop-helix protein 136) (AtbHLH136) (bHLH 136) (Protein BANQUO 1) (Protein PACLOBUTRAZOL RESISTANCE 1) (bHLH transcription factorbHLH136) [PRE1] [BHLH136] [BNQ1] [MYH19.1]	basic helix-loop-helix (bHLH) DNA-binding family protein				AT2G34080		Cysteine proteinases superfamily protein				AT2G21200	SAUR7	SAUR-like auxin-responsive protein family
AT1G67900	BTB/POZ domain-containing protein At1g67900 [T23K23.25]	Phototropic-responsive NPH3 family protein	AT1G36940			AT5G43700	Auxin-responsive protein IAA4 (Auxin-induced protein AUX2-11) (Indoleacetic acid-induced protein 4) [IAA4] [AUX2-11] [MQD19.3]	AUX/IAA transcriptional regulator family protein				AT2G34650	Protein kinase PINOID (EC 2.7.11.1) (Protein kinase ABRUPTUS) [PID] [ABR] [T31E10.1]	Protein kinase superfamily protein				AT2G21210	SAUR6	SAUR-like auxin-responsive protein family
AT1G68360	Zinc finger protein GIS3 (Protein GLABROUS INFLORESCENCE STEMS 3) [GIS3] [T22E19.1]	C2H2 and C2HC zinc fingers superfamily protein	AT1G44050		Cysteine/Histidine-rich C1 domain family protein	AT5G46240	Potassium channel KAT1 [KAT1] [MPL12.2]	potassium channel in Arabidopsis thaliana 1				AT2G35990	Cytokinin riboside 5'-monophosphate phosphoribohydrolase LOG2 (EC 3.2.2.n1) (Protein LONELY GUY 2) [LOG2] [F11F19.10]	Putative lysine decarboxylase family protein				AT2G22830	Squalene epoxidase 2, mitochondrial precursor (EC 1.14.14.17) (AtSQE2) [SQE2] [T20K9.4]	squalene epoxidase 2
AT1G68620	Probable carboxylesterase 6 (AtCXE6) (EC 3.1.1.1) [CXE6] [F24J5.14]	alpha/beta-Hydrolases superfamily protein	AT1G47655	Dof zinc finger protein DOF1.6 (AtDOF1.6) [DOF1.6] [F16N3.5]	Dof-type zinc finger DNA-binding family protein	AT5G47370	Homeobox-leucine zipper protein HAT2 (Homeodomain-leucine zipper protein HAT2) (HD-ZIP protein 2) [HAT2] [MQL5.23]	Homeobox-leucine zipper protein 4 (HB-4) / HD-ZIP protein				AT2G38120	Auxin transporter protein 1 (Auxin influx carrier protein 1) (Polar auxin transport inhibitor-resistant protein 1) [AUX1] [AUX] [PIR1] [WAV5] [F16M14.5]	Transmembrane amino acid transporter family protein				AT2G23060	Probable N-acetyltransferase HLS1-like (EC 2.3.1.-) [F21P24.12]	Acyl-CoA N-acyltransferases (NAT) superfamily protein
AT1G68880	Basic leucine zipper 8 (AtbZIP8) (bZIP protein 8) [BZIP8] [F14K14.1]	basic leucine-zipper 8	AT1G47860		transposable element gene	AT5G50090						AT2G39380		exocyst subunit exo70 family protein H2				AT2G23180		cytochrome P450, family 96, subfamily A, polypeptide 1
AT1G70550		Protein of Unknown Function (DUF239)	AT1G49390		2-oxoglutarate (2OG) and Fe(II)-dependent oxygenase superfamily protein	AT5G50130		NAD(P)-binding Rossmann-fold superfamily protein				AT2G39700	Expansin-A4 precursor (AtEXPA4) (Alpha-expansin-4) (At-EXP4) (AtEx4) (Ath-ExpAlpha-1.6) [EXPA4] [EXP4] [F17A14.7]	expansin A4				AT2G25000	Probable WRKY transcription factor 60 (WRKY DNA-binding protein 60) [WRKY60] [F27C12.8]	WRKY DNA-binding protein 60
AT1G70910		RING/U-box superfamily protein	AT1G49780	U-box domain-containing protein 26 (EC 2.3.2.27) (Plant U-box protein 26) (RING-type E3 ubiquitin transferase PUB26) [PUB26] [F14J22.1]	plant U-box 26	AT5G52810	Protein SAR DEFICIENT 4 precursor (Ornithine cyclodeaminase-like protein) (AtOCD) [SARD4] [OCD] [MXC20.2]	NAD(P)-binding Rossmann-fold superfamily protein				AT2G39870						AT2G28350	Auxin response factor 10 [ARF10] [T1B3.13]	auxin response factor 10
AT1G70920	Homeobox-leucine zipper protein ATHB-X (HD-ZIP protein ATHB-X) (Homeodomain transcription factor ATHB-X) [ATHB-X] [F15H11_25]	homeobox-leucine zipper protein 18	AT1G51170	Serine/threonine-protein kinase UCN (EC 2.7.11.1) (AGC serine/threonine-protein kinase subfamily 2 member 3) (Protein UNICORN) [UNC] [AGC2-3] [F11M15.3] [F23H24.1]	Protein kinase superfamily protein	AT5G53290	Ethylene-responsive transcription factor CRF3 (Protein CYTOKININ RESPONSE FACTOR 3) [CRF3] [ERF065] [K19E1.9]	cytokinin response factor 3				AT2G41130	Transcription factor bHLH106 (Basic helix-loop-helix protein 106) (AtbHLH106) (bHLH 106) (Transcription factor EN 56) (bHLH transcription factor bHLH106) [BHLH106] [EN56] [T3K9.10]	basic helix-loop-helix (bHLH) DNA-binding superfamily protein				AT2G28690		Protein of unknown function (DUF1635)
AT1G70940	Auxin efflux carrier component 3 (AtPIN3) [PIN3] [F15H11.14]	Auxin efflux carrier family protein	AT1G52565			AT5G64770	Protein GOLVEN 2 precursor (CLAVATA3/ESR (CLE)-related protein CLEL9) (CLE-Like protein 9) (Root meristem growth factor 9) (AtRGF9) [Contains: GLV2p] [GLV2] [CLEL9] [RGF9] [MVP7.10]					AT2G44230		Plant protein of unknown function (DUF946)				AT2G30040		mitogen-activated protein kinase kinase kinase 14
AT1G71380	Endoglucanase 9 precursor (EC 3.2.1.4) (Cellulase 3) (AtCEL3) (Endo-1,4-beta glucanase 9) [CEL3] [F26A9.24]	cellulase 3	AT1G52830	Auxin-responsive protein IAA6 (Indoleacetic acid-induced protein 6) [IAA6] [SHY1] [F14G24.10]	indole-3-acetic acid 6	AT5G66580						AT2G46570	Laccase-6 precursor (EC 1.10.3.2) (Benzenediol:oxygen oxidoreductase 6) (Diphenol oxidase 6) (Urishiol oxidase 6) [LAC6] [F13A10.10]	laccase 6				AT2G33310	Auxin-responsive protein IAA13 (Indoleacetic acid-induced protein 13) [IAA13] [F4P9.8]	auxin-induced protein 13
AT1G72280	Endoplasmic reticulum oxidoreductin-1 precursor (EC 1.8.4.-) [AERO1] [ERO1] [T9N14.18]	endoplasmic reticulum oxidoreductins 1	AT1G52855									AT2G46810	Transcription factor bHLH70 (Basic helix-loop-helix protein 70) (AtbHLH70) (bHLH 70) (Transcription factor EN 13) (bHLH transcription factor bHLH070) [BHLH70] [EN13] [F19D11.9]	basic helix-loop-helix (bHLH) DNA-binding superfamily protein				AT2G33320		Calcium-dependent lipid-binding (CaLB domain) family protein
AT1G73590	Auxin efflux carrier component 1 (Protein PIN-FORMED) (AtPIN1) [PIN1] [F6D5.2]	Auxin efflux carrier family protein	AT1G52880	NAC domain-containing protein 18 (ANAC018) (Protein NAC-REGULATED SEED MORPHOLOGY 2) (Protein NO APICAL MERISTEM) (AtNAM) [NAC018] [NAM] [NARS2] [F14G24.15]	NAC (No Apical Meristem) domain transcriptional regulator superfamily protein							AT2G47140	Short-chain dehydrogenase reductase 3b (EC 1.1.1.-) (AtSDR3b) [SDR3b] [SDR3] [SDR5] [F14M4]	NAD(P)-binding Rossmann-fold superfamily protein				AT2G35350	Protein phosphatase 2C 29 (EC 3.1.3.16) (AtPP2C29) (Protein POLTERGEIST-LIKE 1) (Protein phosphatase 2C PLL1) (PP2C PLL1) [PLL1] [T32F12.27]	poltergeist like 1
AT1G74110		cytochrome P450, family 78, subfamily A, polypeptide 10	AT1G53163									AT2G47560	RING-H2 finger protein ATL64 (EC 2.3.2.27) (RING-type E3 ubiquitin transferase ATL64) [ATL64] [T30B22.14]	RING/U-box superfamily protein				AT2G35600	Protein Brevis radix-like 1 (AtBRXL1) [BRXL1] [T32F12.2]	BREVIS RADIX-like 1
AT1G74420	Fucosyltransferase 3 (EC 2.4.1.-) (AtFUT3) [FUT3] [F1M20.10]	fucosyltransferase 3	AT1G54120									AT2G47890	Zinc finger protein CONSTANS-LIKE 13 [COL13] [F17A22.28] [T9J23]	B-box type zinc finger protein with CCT domain				AT2G35743
AT1G74430		myb domain protein 95	AT1G55580	Scarecrow-like protein 18 (AtSCL18) (GRAS family protein 7) (AtGRAS-7) (Protein LATERAL SUPPRESSOR) [SCL18] [LAS] [F20N2.1]	GRAS family transcription factor							AT3G02000	Glutaredoxin-C7 (AtGrxC7) (Protein ROXY 1) [GRXC7] [AT.I.24-1] [ROXY1] [F1C9.22] [F28J7.33]	Thioredoxin superfamily protein				AT2G36220
AT1G75490	Dehydration-responsive element-binding protein 2D (Protein DREB2D) [DREB2D] [ERF049] [F10A5.29]	Integrase-type DNA-binding superfamily protein	AT1G55910	Zinc transporter 11 precursor (ZRT/IRT-like protein 11) [ZIP11] [F14J16.16]	zinc transporter 11 precursor							AT3G02670		Glycine-rich protein family				AT2G40130	Protein SMAX1-LIKE 8 (AtSMXL8) (Protein D53-like 3) (AtD53-like 3) (Protein D53-like SMXL 8) [SMXL8] [T07M07.2]	Double Clp-N motif-containing P-loop nucleoside triphosphate hydrolases superfamily protein
AT1G75500	Protein WALLS ARE THIN 1 [WAT1] [F10A5.28] [F1B16.19]	Walls Are Thin 1	AT1G58007									AT3G03170						AT2G41170	F-box protein At2g41170 [T3K9.6]	F-box family protein
AT1G75640		Leucine-rich receptor-like protein kinase family protein	AT1G58340	Protein DETOXIFICATION 48 (AtDTX48) (Multidrug and toxic compound extrusion protein 48) (MATE protein 48) (Protein ABNORMAL SHOOT 4) (Protein BUSH-AND-CHLOROTIC-DWARF 1)(Protein BCD1) (Protein ZRIZI) [DTX48] [ABS4] [BCD1] [ZF14] [ZRZ] [F19C14.5]	MATE efflux family protein							AT3G04730	Auxin-responsive protein IAA16 (Indoleacetic acid-induced protein 16) [IAA16] [F7O18.22]	indoleacetic acid-induced protein 16				AT2G41510	Cytokinin dehydrogenase 1 precursor (EC 1.5.99.12) (Cytokinin oxidase 1) (AtCKX1) (CKO 1) [CKX1] [T32G6.3]	cytokinin oxidase/dehydrogenase 1
AT1G76610		Protein of unknown function, DUF617	AT1G60010									AT3G04770	40S ribosomal protein Sa-2 (p40 protein homolog) [RPSaB] [F7O18.26]	40s ribosomal protein SA B				AT2G41660	Protein MIZU-KUSSEI 1 [MIZ1] [T32G6.18]	Protein of unknown function, DUF617
AT1G78100	F-box protein AUF1 (F-box protein At1g78100) (Protein AUXIN UP-REGULATED F-BOX PROTEIN 1) [AUF1] [T11I11.4]	F-box family protein	AT1G60020		transposable element gene							AT3G11150		2-oxoglutarate (2OG) and Fe(II)-dependent oxygenase superfamily protein				AT2G41820	Leucine-rich repeat receptor-like tyrosine-protein kinase PXC3 precursor (EC 2.7.10.1) (Protein PXY/TDR-CORRELATED 3) [PXC3] [T11A7.8]	Leucine-rich repeat protein kinase family protein
AT1G78120		Tetratricopeptide repeat (TPR)-like superfamily protein	AT1G60630	Inactive leucine-rich repeat receptor-like serine/threonine-protein kinase At1g60630 precursor [F8A5.15]	Leucine-rich repeat protein kinase family protein							AT3G11340	UDP-glycosyltransferase 76B1 (EC 2.4.1.-) [UGT76B1] [F11B9.23] [F24K9.1]	UDP-Glycosyltransferase superfamily protein				AT2G42430	LOB domain-containing protein 16 (ASYMMETRIC LEAVES 2-like protein 18) (AS2-like protein 18) [LBD16] [ASL18] [MHK10.15]	lateral organ boundaries-domain 16
AT1G79760		downstream target of AGL15-4	AT1G61255									AT3G11750	Dihydroneopterin aldolase 1 (EC 4.1.2.25) (DHNA1) (7,8-dihydroneopterin aldolase) (AtFolB1) [FOLB1] [F26K24.4]	Dihydroneopterin aldolase				AT2G42440	LOB domain-containing protein 17 (ASYMMETRIC LEAVES 2-like protein 15) (AS2-like protein 15) [LBD17] [ASL15] [MHK10.16]	Lateral organ boundaries (LOB) domain family protein
AT1G80240		Protein of unknown function, DUF642	AT1G61480	G-type lectin S-receptor-like serine/threonine-protein kinase At1g61480 precursor (EC 2.7.11.1) [T1F9.2]	S-locus lectin protein kinase family protein							AT3G12670		CTP synthase family protein				AT2G43060	Transcription factor IBH1 (AtIBH1) (BHLH transcription factor zeta) (bHLH zeta) (Basic helix-loop-helix protein 158) (AtbHLH158) (bHLH 158) (Protein ILI1-BINDING BHLH 1)(bHLH transcription factor bHLH158) [IBH1] [BHLH158] [MFL8.8]	ILI1 binding bHLH 1
AT2G01430	Homeobox-leucine zipper protein ATHB-17 (HD-ZIP protein ATHB-17) (Homeodomain transcription factor ATHB-17) [ATHB-17] [F2I9.5]	homeobox-leucine zipper protein 17	AT1G62440	Leucine-rich repeat extensin-like protein 2 precursor (AtLRX2) (LRR/EXTENSIN2) (Cell wall hydroxyproline-rich glycoprotein) [LRX2] [F24O1.18] [T3P18.1]	leucine-rich repeat/extensin 2							AT3G13310		Chaperone DnaJ-domain superfamily protein				AT2G43860	Probable polygalacturonase At2g43860 precursor (EC 3.2.1.15) (PG) (Pectinase At2g43860) [F18O19.3]	Pectin lyase-like superfamily protein
AT2G02450	NAC domain-containing protein 35 (ANAC035) (Protein LONG VEGETATIVE PHASE 1) (AtLOV1) [NAC035]	NAC domain containing protein 35	AT1G62700	NAC domain-containing protein 26 (ANAC026) (Protein VASCULAR RELATED NAC-DOMAIN 5) [NAC026] [VND5] [F23N19.6]	Arabidopsis NAC domain containing protein 26							AT3G13380	Receptor-like protein kinase BRI1-like 3 precursor (EC 2.7.10.1) (EC 2.7.11.1) (BRASSINOSTEROID INSENSITIVE 1-like protein 3) [BRL3] [MRP15.1]	BRI1-like 3				AT2G45420	LOB domain-containing protein 18 (ASYMMETRIC LEAVES 2-like protein 20) (AS2-like protein 20) [LBD18] [ASL20] [F4L23.7]	LOB domain-containing protein 18
AT2G03830	Protein GOLVEN 6 precursor (CLAVATA3/ESR (CLE)-related protein CLEL2) (CLE-Like protein 2) (Root meristem growth factor 8) (AtRGF8) [Contains: GLV6p] [GLV6] [CLEL2] [RGF8] [T18C20.3]		AT1G62990	Homeobox protein knotted-1-like 7 (Protein IRREGULAR XYLEM 11) (Protein KNAT7) [KNAT7] [IRX11] [F16P17.16]	KNOTTED-like homeobox of Arabidopsis thaliana 7							AT3G13810	Protein indeterminate-domain 11 [IDD11] [MCP4.2]	indeterminate(ID)-domain 11				AT2G47130	Short-chain dehydrogenase reductase 3a (EC 1.1.1.-) (AtSDR3a) [SDR3a] [SDR3] [SDR4] [F14M4]	NAD(P)-binding Rossmann-fold superfamily protein
AT2G04038		basic leucine-zipper 48	AT1G63410	Protein LURP-one-related 4 [F2K11.21]	Protein of unknown function (DUF567)							AT3G15250						AT2G47860	BTB/POZ domain-containing protein SETH6 [SETH6] [F17A22.25]	Phototropic-responsive NPH3 family protein
AT2G13810	Aminotransferase ALD1, chloroplastic precursor (EC 2.6.1.-) (AGD2-like defense response protein 1) [ALD1] [F13J11.16]	AGD2-like defense response protein 1	AT1G63420		Arabidopsis thaliana protein of unknown function (DUF821)							AT3G16500	Auxin-responsive protein IAA26 (Indoleacetic acid-induced protein 26) (Phytochrome-associated protein 1) [IAA26] [PAP1] [MDC8.13]	phytochrome-associated protein 1				AT3G02493	Small polypeptide DEVIL 2 (Small polypeptide ROTUNDIFOLIA like 19) (Small polypeptide ROT-FOUR-LIKE 19) [DVL2] [RTFL19] [F16B3]	ROTUNDIFOLIA like 19
AT2G14960	Probable indole-3-acetic acid-amido synthetase GH3.1 (EC 6.3.2.-) (Auxin-responsive GH3-like protein 1) (AtGH3-1) [GH3.1] [T26I20.12]	Auxin-responsive GH3 family protein	AT1G64405									AT3G16870	GATA transcription factor 17 [GATA17] [MUH15.3]	GATA transcription factor 17				AT3G02885	Gibberellin-regulated protein 5 precursor (GAST1 protein homolog 5) [GASA5] [F13E7]	GAST1 protein homolog 5
AT2G17080		Arabidopsis protein of unknown function (DUF241)	AT1G64625	Transcription factor bHLH157 (BHLH transcription factor epsilon) (bHLH epsilon) (Basic helix-loop-helix protein 157) (AtbHLH157) (bHLH 157) (LONESOME HIGHWAY-like protein 2) (bHLH transcription factor bHLH157) [BHLH157] [F1N19]	Serine/threonine-protein kinase WNK (With No Lysine)-related							AT3G17090	Probable protein phosphatase 2C 42 (EC 3.1.3.16) (AtPP2C42) [K14A17.16] [K14A17.4]	Protein phosphatase 2C family protein				AT3G03660	WUSCHEL-related homeobox 11 [WOX11] [T12J13.6]	WUSCHEL related homeobox 11
AT2G18010	SAUR10	SAUR-like auxin-responsive protein family	AT1G64640		early nodulin-like protein 8							AT3G18200	WAT1-related protein At3g18200 [MRC8.20]	nodulin MtN21 /EamA-like transporter family protein				AT3G04570	AT-hook motif nuclear-localized protein 19 [AHL19] [F7O18.4]	AT-hook motif nuclear-localized protein 19
AT2G21050	Auxin transporter-like protein 2 (AUX1-like protein 2) [LAX2] [F26H11.19]	like AUXIN RESISTANT 2	AT1G64710	Alcohol dehydrogenase-like 4 (EC 1.1.1.1) [F13O11.3]	GroES-like zinc-binding dehydrogenase family protein							AT3G18710	U-box domain-containing protein 29 (EC 2.3.2.27) (Plant U-box protein 29) (RING-type E3 ubiquitin transferase PUB29) [PUB29] [MVE11.7]	plant U-box 29				AT3G06868
AT2G21195			AT1G65840	Probable polyamine oxidase 4 (EC 1.5.3.16) (AtPAO4) (Amine oxidase 2) [PAO4] [F1E22.18]	polyamine oxidase 4							AT3G19300		Protein kinase superfamily protein				AT3G07000		Cysteine/Histidine-rich C1 domain family protein
AT2G21200	SAUR7	SAUR-like auxin-responsive protein family	AT1G65920		Regulator of chromosome condensation (RCC1) family with FYVE zinc finger domain							AT3G19310		PLC-like phosphodiesterases superfamily protein				AT3G07390	Auxin-induced in root cultures protein 12 precursor [AIR12] [F21O3_10]	auxin-responsive family protein
AT2G21210	SAUR6	SAUR-like auxin-responsive protein family	AT1G67265	Small polypeptide DEVIL 3 (Small polypeptide ROTUNDIFOLIA LIKE 21) (Small polypeptide ROT-FOUR-LIKE 21) [DVL3] [RTFL21] [F1N21]	ROTUNDIFOLIA like 21							AT3G20460	Putative sugar transporter ERD6-like 13 [MQC12.5]	Major facilitator superfamily protein				AT3G10870	Methylesterase 17 (EC 3.1.1.-) (AtMES17) (Methyl indole-3-acetic acid esterase) [MES17] [T7M13.5]	methyl esterase 17
AT2G22810	1-aminocyclopropane-1-carboxylate synthase 4 (EC 4.4.1.14) (ACC synthase 4) (S-adenosyl-L-methionine methylthioadenosine-lyase 4) [ACS4] [ACC4] [T20K9.2]	1-aminocyclopropane-1-carboxylate synthase 4	AT1G67340	F-box protein At1g67340 [F1N21.16]	HCP-like superfamily protein with MYND-type zinc finger							AT3G21320						AT3G13000		Protein of unknown function, DUF547
AT2G22830	Squalene epoxidase 2, mitochondrial precursor (EC 1.14.14.17) (AtSQE2) [SQE2] [T20K9.4]	squalene epoxidase 2	AT1G67400		ELMO/CED-12 family protein							AT3G21700		Ras-related small GTP-binding family protein				AT3G14362	Small polypeptide DEVIL 19 (Small polypeptide ROTUNDIFOLIA LIKE 10) (Small polypeptide ROT-FOUR-LIKE 10) [DVL19] [RTFL10] [MLN21]	ROTUNDIFOLIA like 10
AT2G23060	Probable N-acetyltransferase HLS1-like (EC 2.3.1.-) [F21P24.12]	Acyl-CoA N-acyltransferases (NAT) superfamily protein	AT1G67770		terminal EAR1-like 2							AT3G22100	Transcription factor bHLH117 (Basic helix-loop-helix protein 117) (AtbHLH117) (bHLH 117) (Transcription factor EN 140) (bHLH transcription factor bHLH117) [BHLH117] [EN140] [MZN24.31]	basic helix-loop-helix (bHLH) DNA-binding superfamily protein				AT3G14370	Serine/threonine-protein kinase WAG2 (EC 2.7.11.1) [WAG2] [MLN21.15]	Protein kinase superfamily protein
AT2G23170	Indole-3-acetic acid-amido synthetase GH3.3 (EC 6.3.2.-) (Auxin-responsive GH3-like protein 3) (AtGH3-3) [GH3.3] [T20D16.20]	Auxin-responsive GH3 family protein	AT1G67900	BTB/POZ domain-containing protein At1g67900 [T23K23.25]	Phototropic-responsive NPH3 family protein							AT3G23340	Casein kinase 1-like protein 10 (EC 2.7.11.1) (Protein CASEIN KINASE I-LIKE 10) [CKL10] [CKI2] [MLM24.7]	casein kinase I-like 10				AT3G14440	9-cis-epoxycarotenoid dioxygenase NCED3, chloroplastic precursor (EC 1.13.11.51) (AtNCED3) (Protein SALT TOLERANT 1) [NCED3] [STO1] [MOA2.4]	nine-cis-epoxycarotenoid dioxygenase 3
AT2G23180		cytochrome P450, family 96, subfamily A, polypeptide 1	AT1G68330									AT3G25620	ABC transporter G family member 21 (ABC transporter ABCG.21) (AtABCG21) (White-brown complex homolog protein 21) (AtWBC21) [ABCG21] [WBC21] [T5M7.6]	ABC-2 type transporter family protein				AT3G18950		Transducin/WD40 repeat-like superfamily protein
AT2G25000	Probable WRKY transcription factor 60 (WRKY DNA-binding protein 60) [WRKY60] [F27C12.8]	WRKY DNA-binding protein 60	AT1G68360	Zinc finger protein GIS3 (Protein GLABROUS INFLORESCENCE STEMS 3) [GIS3] [T22E19.1]	C2H2 and C2HC zinc fingers superfamily protein							AT3G25730	AP2/ERF and B3 domain-containing transcription factor ARF14 (Protein AUXIN RESPONSE FACTOR 14) (RAV1-like ethylene-responsive transcription factor ARF14) [ARF14] [K13N2.14] [K13N2.7]	ethylene response DNA binding factor 3				AT3G19200
AT2G26710	Cytochrome P450 734A1 (EC 1.14.-.-) (Protein PHYB ACTIVATION-TAGGED SUPPRESSOR 1) [CYP734A1] [BAS1] [F18A8.8]	Cytochrome P450 superfamily protein	AT1G68620	Probable carboxylesterase 6 (AtCXE6) (EC 3.1.1.1) [CXE6] [F24J5.14]	alpha/beta-Hydrolases superfamily protein							AT3G25882	Protein NIM1-INTERACTING 2 (Protein NIMIN-2) [NIMIN-2] [MPE11.4]	NIM1-interacting 2				AT3G20830	Serine/threonine-protein kinase UCNL (EC 2.7.11.1) (AGC serine/threonine-protein kinase subfamily 2 member 4) (Protein UNICORN-LIKE) [UCNL] [AGC2-4] [MOE17.14]	AGC (cAMP-dependent, cGMP-dependent and protein kinase C) kinase family protein
AT2G28350	Auxin response factor 10 [ARF10] [T1B3.13]	auxin response factor 10	AT1G68810	Transcription factor bHLH30 (Basic helix-loop-helix protein 30) (AtbHLH30) (bHLH 30) (Transcription factor EN 53) (bHLH transcription factor bHLH030) [BHLH30] [EN53] [F14K14.8] [T6L1.1]	basic helix-loop-helix (bHLH) DNA-binding superfamily protein							AT3G26080	Probable plastid-lipid-associated protein 5, chloroplastic precursor (Fibrillin-3b) [PAP5] [FBN3b] [FIB3b] [MPE11.25]	plastid-lipid associated protein PAP / fibrillin family protein				AT3G21420		2-oxoglutarate (2OG) and Fe(II)-dependent oxygenase superfamily protein
AT2G28690		Protein of unknown function (DUF1635)	AT1G68825	Small polypeptide DEVIL 5 (Small polypeptide ROTUNDIFOLIA like 15) (Small polypeptide ROT-FOUR-LIKE 15) [DVL5] [RTFL15] [F14K14] [T6L1]	ROTUNDIFOLIA like 15							AT3G27500		Cysteine/Histidine-rich C1 domain family protein				AT3G22820	EPIDERMAL PATTERNING FACTOR-like protein 5 precursor (EPF-like protein 5) [Contains: CHALLAH-LIKE1] [EPFL5] [CLL1] [MWI23.19]	allergen-related
AT2G30040		mitogen-activated protein kinase kinase kinase 14	AT1G68880	Basic leucine zipper 8 (AtbZIP8) (bZIP protein 8) [BZIP8] [F14K14.1]	basic leucine-zipper 8							AT3G29370						AT3G23030	Auxin-responsive protein IAA2 (Indoleacetic acid-induced protein 2) [IAA2] [MXC7.6]	indole-3-acetic acid inducible 2
AT2G33310	Auxin-responsive protein IAA13 (Indoleacetic acid-induced protein 13) [IAA13] [F4P9.8]	auxin-induced protein 13	AT1G69570	Cyclic dof factor 5 (Dof zinc finger protein DOF1.10) (AtDOF1.10) (H-protein promoter-binding factor 2b) [CDF5] [DOF1.10] [HPPBF-2B] [F10D13.20] [F24J1.25]	Dof-type zinc finger DNA-binding family protein							AT3G44735	Putative phytosulfokines 6 precursor (AtPSK3_2) (AtPSK6) [Contains: Phytosulfokine-alpha-like (PSK-alpha-like) (Phytosulfokine-a-like); Phytosulfokine-beta (PSK-beta) (Phytosulfokine-b)] [PSK6] [PSK3] [T32N15.2]	PHYTOSULFOKINE 3 PRECURSOR				AT3G23635	Small polypeptide DEVIL 23 (Small polypeptide ROTUNDIFOLIA LIKE 13) (Small polypeptide ROT-FOUR-LIKE 13) [DVL23] [RTFL13] [MDB19]	ROTUNDIFOLIA like 13
AT2G33320		Calcium-dependent lipid-binding (CaLB domain) family protein	AT1G69790	Probable serine/threonine-protein kinase PBL18 (EC 2.7.11.1) (PBS1-like protein 18) [PBL18] [T6C23.1]	Protein kinase superfamily protein							AT3G49350		Ypt/Rab-GAP domain of gyp1p superfamily protein				AT3G23637	Small polypeptide DEVIL 21 (Small polypeptide ROTUNDIFOLIA LIKE 23) (Small polypeptide ROT-FOUR-LIKE 23) [DVL21] [RTFL23] [MDB19]	DVL family protein
AT2G35350	Protein phosphatase 2C 29 (EC 3.1.3.16) (AtPP2C29) (Protein POLTERGEIST-LIKE 1) (Protein phosphatase 2C PLL1) (PP2C PLL1) [PLL1] [T32F12.27]	poltergeist like 1	AT1G70550		Protein of Unknown Function (DUF239)							AT3G49700	1-aminocyclopropane-1-carboxylate synthase 9 (EC 4.4.1.14) (ACC synthase 9) (Ethylene-overproduction protein 3) (S-adenosyl-L-methionine methylthioadenosine-lyase 9) [ACS9] [ETO3] [T16K5.50]	1-aminocyclopropane-1-carboxylate synthase 9				AT3G23640		heteroglycan glucosidase 1
AT2G35600	Protein Brevis radix-like 1 (AtBRXL1) [BRXL1] [T32F12.2]	BREVIS RADIX-like 1	AT1G70910		RING/U-box superfamily protein							AT3G50340						AT3G25130
AT2G35743			AT1G70920	Homeobox-leucine zipper protein ATHB-X (HD-ZIP protein ATHB-X) (Homeodomain transcription factor ATHB-X) [ATHB-X] [F15H11_25]	homeobox-leucine zipper protein 18							AT3G52180	Phosphoglucan phosphatase DSP4, chloroplastic precursor (EC 3.1.3.-) (AtPTPKIS1) (Dual specificity protein phosphatase 4) (Protein STARCH-EXCESS 4) (AtSEX4) [DSP4] [PTPKIS1] [SEX4] [F4F15.290]	dual specificity protein phosphatase (DsPTP1) family protein				AT3G25710	Transcription factor AIG1 (AtAIG1) (Basic helix-loop-helix protein 32) (AtbHLH32) (bHLH 32) (Protein TARGET OF MOOPTEROS 5) (Transcription factor EN 54) (bHLH transcription factor bHLH032) [BHLH32] [EN54] [TMO5] [K13N2.1]	basic helix-loop-helix 32
AT2G36220			AT1G70940	Auxin efflux carrier component 3 (AtPIN3) [PIN3] [F15H11.14]	Auxin efflux carrier family protein							AT3G54510	CSC1-like protein At3g54510 [T14E10_80]	Early-responsive to dehydration stress protein (ERD4)				AT3G25717	Small polypeptide DEVIL 6 (Small polypeptide ROTUNDIFOLIA LIKE 16) (Small polypeptide ROT-FOUR-LIKE 16) [DVL6] [RTFL16] [K13N2]	ROTUNDIFOLIA like 16
AT2G39370	Probable membrane-associated kinase regulator 4 [MAKR4] [F12L6.3]		AT1G71380	Endoglucanase 9 precursor (EC 3.2.1.4) (Cellulase 3) (AtCEL3) (Endo-1,4-beta glucanase 9) [CEL3] [F26A9.24]	cellulase 3							AT3G55690						AT3G25930		Adenine nucleotide alpha hydrolases-like superfamily protein
AT2G40130	Protein SMAX1-LIKE 8 (AtSMXL8) (Protein D53-like 3) (AtD53-like 3) (Protein D53-like SMXL 8) [SMXL8] [T07M07.2]	Double Clp-N motif-containing P-loop nucleoside triphosphate hydrolases superfamily protein	AT1G72125	Protein NRT1/ PTR FAMILY 5.13 (AtNPF5.13) (Nitrate transporter 1.16) [NPF5.13] [NRT1.16] [F28P5.2]	Major facilitator superfamily protein							AT3G55720		Protein of unknown function (DUF620)				AT3G26760		NAD(P)-binding Rossmann-fold superfamily protein
AT2G41170	F-box protein At2g41170 [T3K9.6]	F-box family protein	AT1G72230		Cupredoxin superfamily protein							AT3G58120	Basic leucine zipper 61 (AtbZIP61) (bZIP protein 61) [BZIP61] [F9D24.30]	Basic-leucine zipper (bZIP) transcription factor family protein				AT3G28857	Transcription factor PRE5 (Basic helix-loop-helix protein 164) (AtbHLH164) (bHLH 164) (Protein PACLOBUTRAZOL RESISTANCE 5) (bHLH transcription factor bHLH164) [PRE5] [BHLH164] [MLD15.1]	basic helix-loop-helix (bHLH) DNA-binding family protein
AT2G41510	Cytokinin dehydrogenase 1 precursor (EC 1.5.99.12) (Cytokinin oxidase 1) (AtCKX1) (CKO 1) [CKX1] [T32G6.3]	cytokinin oxidase/dehydrogenase 1	AT1G72280	Endoplasmic reticulum oxidoreductin-1 precursor (EC 1.8.4.-) [AERO1] [ERO1] [T9N14.18]	endoplasmic reticulum oxidoreductins 1							AT3G58180	Deoxyhypusine hydroxylase (EC 1.14.99.29) (DOHH) (Deoxyhypusine dioxygenase) (Deoxyhypusine monooxygenase) [F9D24.90]	ARM repeat superfamily protein				AT3G44350	Putative NAC domain-containing protein 61 (ANAC061) [NAC061] [T22K7.30]	NAC domain containing protein 61
AT2G41660	Protein MIZU-KUSSEI 1 [MIZ1] [T32G6.18]	Protein of unknown function, DUF617	AT1G73590	Auxin efflux carrier component 1 (Protein PIN-FORMED) (AtPIN1) [PIN1] [F6D5.2]	Auxin efflux carrier family protein							AT3G60630	Scarecrow-like protein 22 (AtSCL22) (GRAS family protein 21) (AtGRAS-21) (SCL6-III) [SCL22] [T4C21.40]	GRAS family transcription factor				AT3G44610		Protein kinase superfamily protein
AT2G41820	Leucine-rich repeat receptor-like tyrosine-protein kinase PXC3 precursor (EC 2.7.10.1) (Protein PXY/TDR-CORRELATED 3) [PXC3] [T11A7.8]	Leucine-rich repeat protein kinase family protein	AT1G73740		UDP-Glycosyltransferase superfamily protein							AT3G60640	Autophagy-related protein 8g precursor (Autophagy-related ubiquitin-like modifier ATG8g) (AtAPG8g) (Protein autophagy 8g) [ATG8G] [APG8G] [T4C21_50]	Ubiquitin-like superfamily protein				AT3G49220	Probable pectinesterase/pectinesterase inhibitor 34 [Includes: Pectinesterase inhibitor 34 (Pectin methylesterase inhibitor 34); Pectinesterase 34 (EC 3.1.1.11) (PE 34)(Pectin methylesterase 34) (AtPME34)] [PME34] [ARATH34] [F2K15.80]	Plant invertase/pectin methylesterase inhibitor superfamily
AT2G42380	Basic leucine zipper 34 (AtbZIP34) (bZIP protein 34) [BZIP34] [MHK10.10]	Basic-leucine zipper (bZIP) transcription factor family protein	AT1G74110		cytochrome P450, family 78, subfamily A, polypeptide 10							AT3G61460	Brassinosteroid-responsive RING protein 1 [BRH1] [F2A19.60]	brassinosteroid-responsive RING-H2				AT3G49750	Receptor-like protein 44 precursor (AtRLP44) [RLP44] [T16K5.100]	receptor like protein 44
AT2G42430	LOB domain-containing protein 16 (ASYMMETRIC LEAVES 2-like protein 18) (AS2-like protein 18) [LBD16] [ASL18] [MHK10.15]	lateral organ boundaries-domain 16	AT1G74420	Fucosyltransferase 3 (EC 2.4.1.-) (AtFUT3) [FUT3] [F1M20.10]	fucosyltransferase 3							AT3G62070						AT3G50280	Uncharacterized acetyltransferase At3g50280 (EC 2.3.1.-) [F11C1.120]	HXXXD-type acyl-transferase family protein
AT2G42440	LOB domain-containing protein 17 (ASYMMETRIC LEAVES 2-like protein 15) (AS2-like protein 15) [LBD17] [ASL15] [MHK10.16]	Lateral organ boundaries (LOB) domain family protein	AT1G74430		myb domain protein 95							AT3G62860		alpha/beta-Hydrolases superfamily protein				AT3G54000
AT2G43060	Transcription factor IBH1 (AtIBH1) (BHLH transcription factor zeta) (bHLH zeta) (Basic helix-loop-helix protein 158) (AtbHLH158) (bHLH 158) (Protein ILI1-BINDING BHLH 1)(bHLH transcription factor bHLH158) [IBH1] [BHLH158] [MFL8.8]	ILI1 binding bHLH 1	AT1G75450	Cytokinin dehydrogenase 5 precursor (EC 1.5.99.12) (Cytokinin oxidase 5) (AtCKX5) (AtCKX6) (CKO5) [CKX5] [CKX6] [F1B16.2]	cytokinin oxidase 5							AT3G62960	Glutaredoxin-C14 (AtGrxC14) (Protein ROXY 8) [GRXC14] [ROXY8] [T20O10.60]	Thioredoxin superfamily protein				AT3G54950	Patatin-like protein 7 (EC 3.1.1.-) (AtPLP7) (Patatin-related phospholipase A IIIbeta) (pPLAIIIb) (Phospholipase A IIIA) (AtPLAIIIA) [PLP7] [F28P10.70]	patatin-like protein 6
AT2G43860	Probable polygalacturonase At2g43860 precursor (EC 3.2.1.15) (PG) (Pectinase At2g43860) [F18O19.3]	Pectin lyase-like superfamily protein	AT1G75490	Dehydration-responsive element-binding protein 2D (Protein DREB2D) [DREB2D] [ERF049] [F10A5.29]	Integrase-type DNA-binding superfamily protein							AT3G63240	Type I inositol polyphosphate 5-phosphatase 4 (EC 3.1.3.-) (At5PTase4) [IP5P4] [F16M2_90]	DNAse I-like superfamily protein				AT3G55740	Proline transporter 2 (AtPROT2) [PROT2] [F1I16.150]	proline transporter 2
AT2G44990	Carotenoid cleavage dioxygenase 7, chloroplastic precursor (AtCCD7) (AtNCED7) (Beta,beta-carotene 9',10'-oxygenase) (EC 1.13.11.68) (Protein MORE AXILLARY BRANCHING 3) (Protein MORE AXILLARY GROWTH 3) [CCD7] [MAX3] [NCED7] [T14P1.21]	carotenoid cleavage dioxygenase 7	AT1G75500	Protein WALLS ARE THIN 1 [WAT1] [F10A5.28] [F1B16.19]	Walls Are Thin 1							AT3G63430						AT3G56770	Putative transcription factor bHLH107 (Basic helix-loop-helix protein 107) (AtbHLH107) (bHLH 107) (Transcription factor EN 55) (bHLH transcription factor bHLH107) [BHLH107] [EN55] [T8M16.100]	basic helix-loop-helix (bHLH) DNA-binding superfamily protein
AT2G45420	LOB domain-containing protein 18 (ASYMMETRIC LEAVES 2-like protein 20) (AS2-like protein 20) [LBD18] [ASL20] [F4L23.7]	LOB domain-containing protein 18	AT1G75640		Leucine-rich receptor-like protein kinase family protein							AT3G63445		other RNA				AT3G56800	Calmodulin-3 (CaM-3) [CAM3] [T8M16.130]	calmodulin 3
AT2G47130	Short-chain dehydrogenase reductase 3a (EC 1.1.1.-) (AtSDR3a) [SDR3a] [SDR3] [SDR4] [F14M4]	NAD(P)-binding Rossmann-fold superfamily protein	AT1G76220		Arabidopsis protein of unknown function (DUF241)							AT4G00080		Plant invertase/pectin methylesterase inhibitor superfamily protein				AT3G56810
AT2G47860	BTB/POZ domain-containing protein SETH6 [SETH6] [F17A22.25]	Phototropic-responsive NPH3 family protein	AT1G76240		Arabidopsis protein of unknown function (DUF241)							AT4G00480	Transcription factor MYC1 (AtMYC1) (Basic helix-loop-helix protein 12) (AtbHLH12) (bHLH 12) (Transcription factor EN 58) (bHLH transcription factor bHLH012) [BHLH12] [EN58] [MYC1] [F6N23.22]	basic helix-loop-helix (bHLH) DNA-binding superfamily protein				AT3G59900	Protein AUXIN-REGULATED GENE INVOLVED IN ORGAN SIZE (AtARGOS) [ARGOS] [F24G16.170]	auxin-regulated gene involved in organ size
AT3G02493	Small polypeptide DEVIL 2 (Small polypeptide ROTUNDIFOLIA like 19) (Small polypeptide ROT-FOUR-LIKE 19) [DVL2] [RTFL19] [F16B3]	ROTUNDIFOLIA like 19	AT1G76610		Protein of unknown function, DUF617							AT4G00940	Dof zinc finger protein DOF4.1 (AtDOF4.1) [DOF4.1] [A_TM018A10.2] [T18A10.24]	Dof-type zinc finger DNA-binding family protein				AT3G60647
AT3G02885	Gibberellin-regulated protein 5 precursor (GAST1 protein homolog 5) [GASA5] [F13E7]	GAST1 protein homolog 5	AT1G77110	Auxin efflux carrier component 6 (AtPIN6) [PIN6] [F22K20.18]	Auxin efflux carrier family protein							AT4G02160						AT3G60670		PLATZ transcription factor family protein
AT3G03660	WUSCHEL-related homeobox 11 [WOX11] [T12J13.6]	WUSCHEL related homeobox 11	AT1G78070		Transducin/WD40 repeat-like superfamily protein							AT4G04710	Calcium-dependent protein kinase 22 (EC 2.7.11.1) [CPK22] [T4B21.12]	calcium-dependent protein kinase 22				AT3G63510		FMN-linked oxidoreductases superfamily protein
AT3G03820	SAUR29	SAUR-like auxin-responsive protein family	AT1G78100	F-box protein AUF1 (F-box protein At1g78100) (Protein AUXIN UP-REGULATED F-BOX PROTEIN 1) [AUF1] [T11I11.4]	F-box family protein							AT4G05018						AT4G01110
AT3G03830	SAUR28	SAUR-like auxin-responsive protein family	AT1G78120		Tetratricopeptide repeat (TPR)-like superfamily protein							AT4G09510	Alkaline/neutral invertase CINV2 (EC 3.2.1.26) (Alkaline/neutral invertase I) (A/N-INVI) (Cytosolic invertase 2) [CINV2] [INVI] [T15G18.70]	cytosolic invertase 2				AT4G01975		transposable element gene
AT3G03840	SAUR27	SAUR-like auxin-responsive protein family	AT1G78970	Lupeol synthase 1 (EC 4.2.1.128) (EC 5.4.99.41) (AtLUP1) (Lupan-3-beta,20-diol synthase) [LUP1] [YUP8H12R.28] [YUP8H12R.42]	lupeol synthase 1							AT4G10370		Cysteine/Histidine-rich C1 domain family protein				AT4G08040	1-aminocyclopropane-1-carboxylate synthase 11 (EC 4.4.1.14) (ACC synthase 11) (S-adenosyl-L-methionine methylthioadenosine-lyase 11) [ACS11] [T17A2.2]	1-aminocyclopropane-1-carboxylate synthase 11
AT3G03850	SAUR26	SAUR-like auxin-responsive protein family	AT1G79760		downstream target of AGL15-4							AT4G11950		Protein of unknown function (DUF1191)				AT4G09890		Protein of unknown function (DUF3511)
AT3G04570	AT-hook motif nuclear-localized protein 19 [AHL19] [F7O18.4]	AT-hook motif nuclear-localized protein 19	AT1G80240		Protein of unknown function, DUF642							AT4G13130		Cysteine/Histidine-rich C1 domain family protein				AT4G09970
AT3G06370	Sodium/hydrogen exchanger 3 (Na(+)/H(+) exchanger 3) (NHE-3) [NHX3] [F24P17.16]	sodium hydrogen exchanger 4	AT2G01200	Auxin-responsive protein IAA32 (Indoleacetic acid-induced protein 32) [IAA32] [F10A8.8]	indole-3-acetic acid inducible 32							AT4G13235	Defensin-like protein 37 precursor (Protein EMBRYO SAC DEVELOPMENT ARREST 21) [EDA21] [F17N18.120]	embryo sac development arrest 21				AT4G10150	RING-H2 finger protein ATL7 (EC 2.3.2.27) (RING-type E3 ubiquitin transferase ATL7) [ATL7] [F28M11.70] [T9A4.19]	RING/U-box superfamily protein
AT3G06868			AT2G01430	Homeobox-leucine zipper protein ATHB-17 (HD-ZIP protein ATHB-17) (Homeodomain transcription factor ATHB-17) [ATHB-17] [F2I9.5]	homeobox-leucine zipper protein 17							AT4G15120		VQ motif-containing protein				AT4G10160	E3 ubiquitin-protein ligase ATL59 (EC 2.3.2.27) (RING-H2 finger protein ATL59) (RING-type E3 ubiquitin transferase ATL59) [ATL59] [F28M11.80] [T9A4.20]	RING/U-box superfamily protein
AT3G07000		Cysteine/Histidine-rich C1 domain family protein	AT2G03830	Protein GOLVEN 6 precursor (CLAVATA3/ESR (CLE)-related protein CLEL2) (CLE-Like protein 2) (Root meristem growth factor 8) (AtRGF8) [Contains: GLV6p] [GLV6] [CLEL2] [RGF8] [T18C20.3]								AT4G15760	Monooxygenase 1 (EC 1.14.13.-) (AtMO1) [MO1] [dl3920c] [FCAALL.376]	monooxygenase 1				AT4G12110	Methylsterol monooxygenase 1-1 (EC 1.14.18.9) (Sterol 4-alpha-methyl-oxidase 1-1) (AtSMO1-1) [SMO1-1] [F16J13.180]	sterol-4alpha-methyl oxidase 1-1
AT3G07390	Auxin-induced in root cultures protein 12 precursor [AIR12] [F21O3_10]	auxin-responsive family protein	AT2G04038		basic leucine-zipper 48							AT4G15765		FAD/NAD(P)-binding oxidoreductase family protein				AT4G13180		NAD(P)-binding Rossmann-fold superfamily protein
AT3G10870	Methylesterase 17 (EC 3.1.1.-) (AtMES17) (Methyl indole-3-acetic acid esterase) [MES17] [T7M13.5]	methyl esterase 17	AT2G13810	Aminotransferase ALD1, chloroplastic precursor (EC 2.6.1.-) (AGD2-like defense response protein 1) [ALD1] [F13J11.16]	AGD2-like defense response protein 1							AT4G17480		alpha/beta-Hydrolases superfamily protein				AT4G13190	Probable serine/threonine-protein kinase PBL24 (EC 2.7.11.1) (PBS1-like protein 24) [PBL24] [F17N18.80]	Protein kinase superfamily protein
AT3G13000		Protein of unknown function, DUF547	AT2G14820	BTB/POZ domain-containing protein NPY2 (Protein NAKED PINS IN YUC MUTANTS 2) [NPY2] [F26C24.4]	Phototropic-responsive NPH3 family protein							AT4G19380	Long-chain-alcohol oxidase FAO4A (EC 1.1.3.20) (Long-chain fatty alcohol oxidase 4A) [FAO4A] [T5K18.160]	Long-chain fatty alcohol dehydrogenase family protein				AT4G13195	CLAVATA3/ESR (CLE)-related protein 44 precursor (Tracheary element differentiation inhibitory factor-like protein) (TDIF-like protein) [Contains: CLE44p] [CLE44] [F17N18]	CLAVATA3/ESR-RELATED 44
AT3G14362	Small polypeptide DEVIL 19 (Small polypeptide ROTUNDIFOLIA LIKE 10) (Small polypeptide ROT-FOUR-LIKE 10) [DVL19] [RTFL10] [MLN21]	ROTUNDIFOLIA like 10	AT2G14960	Probable indole-3-acetic acid-amido synthetase GH3.1 (EC 6.3.2.-) (Auxin-responsive GH3-like protein 1) (AtGH3-1) [GH3.1] [T26I20.12]	Auxin-responsive GH3 family protein							AT4G22545						AT4G14550	Auxin-responsive protein IAA14 (Indoleacetic acid-induced protein 14) (Protein SOLITARY ROOT) [IAA14] [SLR1] [dl3315c] [FCAALL.254]	indole-3-acetic acid inducible 14
AT3G14370	Serine/threonine-protein kinase WAG2 (EC 2.7.11.1) [WAG2] [MLN21.15]	Protein kinase superfamily protein	AT2G15440		Protein of unknown function (DUF579)							AT4G22560						AT4G14819		Protein of unknown function (DUF1677)
AT3G14440	9-cis-epoxycarotenoid dioxygenase NCED3, chloroplastic precursor (EC 1.13.11.51) (AtNCED3) (Protein SALT TOLERANT 1) [NCED3] [STO1] [MOA2.4]	nine-cis-epoxycarotenoid dioxygenase 3	AT2G15490	UDP-glycosyltransferase 73B4 (EC 2.4.1.-) (Flavonol 3-O-glucosyltransferase UGT73B4) (EC 2.4.1.91) [UGT73B4] [F9O13.4]	UDP-glycosyltransferase 73B4							AT4G22790	Protein DETOXIFICATION 56 (AtDTX56) (Multidrug and toxic compound extrusion protein 56) (MATE protein 56) (Protein RESISTANT TO HIGH CARBON DIOXIDE 1) [DTX56] [RHC1] [T12H17.180]	MATE efflux family protein				AT4G15320	Cellulose synthase-like protein B6 (EC 2.4.1.-) (AtCslB6) [CSLB6] [dl3705c] [FCAALL.268]	cellulose synthase-like B6
AT3G15540	Auxin-responsive protein IAA19 (Indoleacetic acid-induced protein 19) (Protein MASSUGU 2) [IAA19] [MSG2] [MJK13.20]	indole-3-acetic acid inducible 19	AT2G17070		Arabidopsis protein of unknown function (DUF241)							AT4G25280	Probable UMP-CMP kinase 2 (EC 2.7.4.14) (Deoxycytidylate kinase) (CK) (dCMP kinase) (Uridine monophosphate/cytidine monophosphate kinase) (UMP/CMP kinase) (UMP/CMPK) [UMK2] [F24A6.120]	P-loop containing nucleoside triphosphate hydrolases superfamily protein				AT4G16515	Protein GOLVEN 1 precursor (CLAVATA3/ESR (CLE)-related protein CLEL6) (CLE-Like protein 6) (Root meristem growth factor 6) (AtRGF6) [Contains: GLV1p] [GLV1] [CLEL6] [RGF6] [FCAALL]
AT3G18950		Transducin/WD40 repeat-like superfamily protein	AT2G17080		Arabidopsis protein of unknown function (DUF241)							AT4G25410	Transcription factor bHLH126 (Basic helix-loop-helix protein 126) (AtbHLH126) (bHLH 126) (Transcription factor EN 3) (bHLH transcription factor bHLH126) [BHLH126] [EN3][T30C3.80]	basic helix-loop-helix (bHLH) DNA-binding superfamily protein				AT4G17615	Calcineurin B-like protein 1 (SOS3-like calcium-binding protein 5) [CBL1] [SCABP5] [dl4845w] [FCAALL.122]	calcineurin B-like protein 1
AT3G19200			AT2G17680		Arabidopsis protein of unknown function (DUF241)							AT4G27270	Probable NAD(P)H dehydrogenase (quinone) FQR1-like 1 (EC 1.6.5.2)	Quinone reductase family protein				AT4G17695	Probable transcription factor KAN3 (Protein KANADI 3) [KAN3] [FCAALL]	Homeodomain-like superfamily protein
AT3G20830	Serine/threonine-protein kinase UCNL (EC 2.7.11.1) (AGC serine/threonine-protein kinase subfamily 2 member 4) (Protein UNICORN-LIKE) [UCNL] [AGC2-4] [MOE17.14]	AGC (cAMP-dependent, cGMP-dependent and protein kinase C) kinase family protein	AT2G17770	bZIP transcription factor 27 (AtbZIP27) (Protein FD PARALOG) [FDP] [BZIP27] [T17A5.15]	basic region/leucine zipper motif 27							AT4G27280	Calcium-binding protein KRP1 (KIC-related protein 1) [KRP1] [M4I22.90]	Calcium-binding EF-hand family protein				AT4G17770	Alpha,alpha-trehalose-phosphate synthase [UDP-forming] 5 (EC 2.4.1.15) (Trehalose-6-phosphate synthase 5) (AtTPS5) [TPS5] [dl4920W] [FCAALL.9]	trehalose phosphatase/synthase 5
AT3G21420		2-oxoglutarate (2OG) and Fe(II)-dependent oxygenase superfamily protein	AT2G18010	SAUR10	SAUR-like auxin-responsive protein family							AT4G28650	MDIS1-interacting receptor like kinase 1 precursor (AtMIK1) (Leucine-rich repeat receptor-like protein kinase PXL2) (EC 2.7.11.1) (Protein PHLOEM INTERCALATED WITH XYLEM-LIKE 2) [MIK1] [PXL2] [T5F17.100]	Leucine-rich repeat transmembrane protein kinase family protein				AT4G20230	Terpenoid synthase 9 (EC 4.2.3.-) (AtTPS09) [TPS09] [F1C12.150]	Terpenoid cyclases/Protein prenyltransferases superfamily protein
AT3G22820	EPIDERMAL PATTERNING FACTOR-like protein 5 precursor (EPF-like protein 5) [Contains: CHALLAH-LIKE1] [EPFL5] [CLL1] [MWI23.19]	allergen-related	AT2G18480	Probable polyol transporter 3 [PLT3] [F24H14.17]	Major facilitator superfamily protein							AT4G30710	AUGMIN subunit 8 (QWRF motif-containing protein 8) (ROP1 enhancer 2) [AUG8] [QWRF8] [REN2] [T10C21.60]	Family of unknown function (DUF566)				AT4G21200	Gibberellin 2-beta-dioxygenase 8 (EC 1.14.11.13) (GA 2-oxidase 8) (Gibberellin 2-beta-hydroxylase 8) (Gibberellin 2-oxidase 8) [GA2OX8] [F7J7.140]	gibberellin 2-oxidase 8
AT3G23030	Auxin-responsive protein IAA2 (Indoleacetic acid-induced protein 2) [IAA2] [MXC7.6]	indole-3-acetic acid inducible 2	AT2G19640	Histone-lysine N-methyltransferase ASHR2 (EC 2.1.1.-) (ASH1-related protein 2) (Protein SET DOMAIN GROUP 39) [ASHR2] [SDG39] [SET39] [F3P11.24]	ASH1-related protein 2							AT4G31620	B3 domain-containing protein REM3 (Protein REPRODUCTIVE MERISTEM 3) [REM3] [F28M20.190]	Transcriptional factor B3 family protein				AT4G21730
AT3G23635	Small polypeptide DEVIL 23 (Small polypeptide ROTUNDIFOLIA LIKE 13) (Small polypeptide ROT-FOUR-LIKE 13) [DVL23] [RTFL13] [MDB19]	ROTUNDIFOLIA like 13	AT2G21050	Auxin transporter-like protein 2 (AUX1-like protein 2) [LAX2] [F26H11.19]	like AUXIN RESISTANT 2							AT4G32780		phosphoinositide binding				AT4G21740
AT3G23637	Small polypeptide DEVIL 21 (Small polypeptide ROTUNDIFOLIA LIKE 23) (Small polypeptide ROT-FOUR-LIKE 23) [DVL21] [RTFL23] [MDB19]	DVL family protein	AT2G21195									AT4G32785						AT4G21745	CRIB domain-containing protein RIC11 (ROP-interactive CRIB motif-containing protein 11) (Target of ROP protein RIC11) [RIC11] [F17L22]	PAK-box/P21-Rho-binding family protein
AT3G23640		heteroglycan glucosidase 1	AT2G21200	SAUR7	SAUR-like auxin-responsive protein family							AT4G32810	Carotenoid cleavage dioxygenase 8, chloroplastic precursor (EC 1.13.11.69) (EC 1.13.11.70) (AtCCD8) (AtNCED8) (Protein MORE AXILLARY BRANCHING 4) (Protein MORE AXILLARYGROWTH 4) [CCD8] [MAX4] [NCED8] [T16I18.20]	carotenoid cleavage dioxygenase 8				AT4G22530		S-adenosyl-L-methionine-dependent methyltransferases superfamily protein
AT3G25130			AT2G21210	SAUR6	SAUR-like auxin-responsive protein family							AT4G32880	Homeobox-leucine zipper protein ATHB-8 (HD-ZIP protein ATHB-8) (Homeodomain transcription factor ATHB-8) [ATHB-8] [HB8] [T16I18.90]	homeobox gene 8				AT4G22780	ACT domain-containing protein ACR7 (Protein ACT DOMAIN REPEATS 7) [ACR7] [T12H17.170]	ACT domain repeat 7
AT3G25710	Transcription factor AIG1 (AtAIG1) (Basic helix-loop-helix protein 32) (AtbHLH32) (bHLH 32) (Protein TARGET OF MOOPTEROS 5) (Transcription factor EN 54) (bHLH transcription factor bHLH032) [BHLH32] [EN54] [TMO5] [K13N2.1]	basic helix-loop-helix 32	AT2G22680	E3 ubiquitin-protein ligase WAVH1 (EC 2.3.2.27) (Protein WAV3 homolog 1) (RING-type E3 ubiquitin transferase WAVH1) [WAVH1]	Zinc finger (C3HC4-type RING finger) family protein							AT4G33970	Pollen-specific leucine-rich repeat extensin-like protein 4 precursor (AtPEX4) (Pollen-specific LRR/EXTENSIN4) (Cell wall hydroxyproline-rich glycoprotein) [PEX4] [F17I5.160]	Leucine-rich repeat (LRR) family protein				AT4G23340		2-oxoglutarate (2OG) and Fe(II)-dependent oxygenase superfamily protein
AT3G25717	Small polypeptide DEVIL 6 (Small polypeptide ROTUNDIFOLIA LIKE 16) (Small polypeptide ROT-FOUR-LIKE 16) [DVL6] [RTFL16] [K13N2]	ROTUNDIFOLIA like 16	AT2G22800	Homeobox-leucine zipper protein HAT9 (Homeodomain-leucine zipper protein HAT9) (HD-ZIP protein 9) [HAT9] [T20K9.1] [T30L20.6]	Homeobox-leucine zipper protein family							AT4G34131	UDP-glycosyltransferase 73B3 (EC 2.4.1.-) (Flavonol 3-O-glucosyltransferase UGT73B3) (EC 2.4.1.91) [UGT73B3] [F28A23.120]	UDP-glucosyl transferase 73B3				AT4G24275
AT3G25900	Homocysteine S-methyltransferase 1 (EC 2.1.1.10) (S-methylmethionine:homocysteine methyltransferase 1) (AtHMT-1) (SMM:Hcy S-methyltransferase 1) [HMT-1] [MPE11.5] [MPE11.6]	Homocysteine S-methyltransferase family protein	AT2G22810	1-aminocyclopropane-1-carboxylate synthase 4 (EC 4.4.1.14) (ACC synthase 4) (S-adenosyl-L-methionine methylthioadenosine-lyase 4) [ACS4] [ACC4] [T20K9.2]	1-aminocyclopropane-1-carboxylate synthase 4							AT4G34135	UDP-glucosyl transferase 73B2 (EC 2.4.1.-) (Flavonol 7-O-glucosyltransferase) (EC 2.4.1.237) (UDP glucose:flavonoid 7-O-glucosyltransferase) [UGT73B2] [F28A23]	UDP-glucosyltransferase 73B2				AT4G25420	Gibberellin 20 oxidase 1 (EC 1.14.11.-) (GA 20-oxidase 1) (AtGA20ox1) (Gibberellin C-20 oxidase 1) [GA20OX1] [20ox1] [At2301] [GA5] [T30C3.90]	2-oxoglutarate (2OG) and Fe(II)-dependent oxygenase superfamily protein
AT3G25930		Adenine nucleotide alpha hydrolases-like superfamily protein	AT2G22821		other RNA							AT4G34800	SAUR4	SAUR-like auxin-responsive protein family				AT4G26540	LRR receptor-like serine/threonine-protein kinase RGI3 precursor (EC 2.7.11.1) (Protein RECEPTOR OF RGF1 1) (Protein RGF1 INSENSITIVE 3) [RGI3] [RGFR1] [RGFR3] [M3E9.30]	Leucine-rich repeat receptor-like protein kinase family protein
AT3G26760		NAD(P)-binding Rossmann-fold superfamily protein	AT2G22830	Squalene epoxidase 2, mitochondrial precursor (EC 1.14.14.17) (AtSQE2) [SQE2] [T20K9.4]	squalene epoxidase 2							AT4G35200		Arabidopsis protein of unknown function (DUF241)				AT4G27240		zinc finger (C2H2 type) family protein
AT3G28420		Putative membrane lipoprotein	AT2G23060	Probable N-acetyltransferase HLS1-like (EC 2.3.1.-) [F21P24.12]	Acyl-CoA N-acyltransferases (NAT) superfamily protein							AT4G35210		Arabidopsis protein of unknown function (DUF241)				AT4G27260	Indole-3-acetic acid-amido synthetase GH3.5 (EC 6.3.2.-) (Auxin-responsive GH3-like protein 5) (AtGH3-5) [GH3.5] [M4I22.70]	Auxin-responsive GH3 family protein
AT3G28455	CLAVATA3/ESR (CLE)-related protein 25 precursor [Contains: CLE25p] [CLE25] [MFJ20]	CLAVATA3/ESR-RELATED 25	AT2G23170	Indole-3-acetic acid-amido synthetase GH3.3 (EC 6.3.2.-) (Auxin-responsive GH3-like protein 3) (AtGH3-3) [GH3.3] [T20D16.20]	Auxin-responsive GH3 family protein							AT4G35660		Arabidopsis protein of unknown function (DUF241)				AT4G27290	G-type lectin S-receptor-like serine/threonine-protein kinase At4g27290 precursor (EC 2.7.11.1) [M4I22.100]	S-locus lectin protein kinase family protein
AT3G28857	Transcription factor PRE5 (Basic helix-loop-helix protein 164) (AtbHLH164) (bHLH 164) (Protein PACLOBUTRAZOL RESISTANCE 5) (bHLH transcription factor bHLH164) [PRE5] [BHLH164] [MLD15.1]	basic helix-loop-helix (bHLH) DNA-binding family protein	AT2G23180		cytochrome P450, family 96, subfamily A, polypeptide 1							AT4G36060	Transcription factor bHLH11 (Basic helix-loop-helix protein 11) (AtbHLH11) (bHLH 11) (Transcription factor EN 137) (bHLH transcription factor bHLH011) [BHLH11] [EN137] [T19K4.190]	basic helix-loop-helix (bHLH) DNA-binding superfamily protein				AT4G27300	G-type lectin S-receptor-like serine/threonine-protein kinase SD1-1 precursor (EC 2.7.11.1) (S-domain-1 (SD1) receptor kinase 1) (SD1-1) [SD11] [M4I22.110]	S-locus lectin protein kinase family protein
AT3G41768		rRNA	AT2G25000	Probable WRKY transcription factor 60 (WRKY DNA-binding protein 60) [WRKY60] [F27C12.8]	WRKY DNA-binding protein 60							AT4G36540	Transcription factor BEE 2 (Basic helix-loop-helix protein 58) (AtbHLH58) (bHLH 58) (Protein Brassinosteroid enhanced expression 2) (Transcription factor EN 80) (bHLH transcription factor bHLH058) [BEE2] [BHLH58] [EN80] [AP22.3]	BR enhanced expression 2				AT4G28490	Receptor-like protein kinase 5 precursor (EC 2.7.10.1) (EC 2.7.11.1) (Protein HAESA) [RLK5] [HAE] [F21O9.180]	Leucine-rich receptor-like protein kinase family protein
AT3G42800	Protein BIG GRAIN 1-like C [T21C14.20]		AT2G25790	Leucine-rich repeat receptor-like serine/threonine-protein kinase SKM1 precursor (EC 2.7.11.1) (Protein STERILITY-REGULATING KINASE MEMBER 1) [SKM1] [F17H15.18]	Leucine-rich receptor-like protein kinase family protein							AT4G37310		cytochrome P450, family 81, subfamily H, polypeptide 1				AT4G28790	Transcription factor bHLH23 (Basic helix-loop-helix protein 23) (AtbHLH23) (bHLH 23) (Transcription factor EN 107) (bHLH transcription factor bHLH023) [BHLH23] [EN107] [F16A16.100]	basic helix-loop-helix (bHLH) DNA-binding superfamily protein
AT3G44350	Putative NAC domain-containing protein 61 (ANAC061) [NAC061] [T22K7.30]	NAC domain containing protein 61	AT2G26700	Protein kinase PINOID 2 (EC 2.7.11.1) (Protein kinase AGC1-10) [PID2] [AGC1-10] [F18A8.7]	AGC (cAMP-dependent, cGMP-dependent and protein kinase C) kinase family protein							AT4G37380	Pentatricopeptide repeat-containing protein ELI1, chloroplastic precursor (Protein EDITING LACKING INSERTIONAL MUTANT 1) [ELI1] [PCMP-H48] [F6G17.30]	Tetratricopeptide repeat (TPR)-like superfamily protein				AT4G31630	Putative B3 domain-containing protein REM4 (Protein REPRODUCTIVE MERISTEM 4) [REM4] [F28M20.180]	Transcriptional factor B3 family protein
AT3G44610		Protein kinase superfamily protein	AT2G26710	Cytochrome P450 734A1 (EC 1.14.-.-) (Protein PHYB ACTIVATION-TAGGED SUPPRESSOR 1) [CYP734A1] [BAS1] [F18A8.8]	Cytochrome P450 superfamily protein							AT4G37900	Glycine-rich domain-containing protein 2 (AtGRDP2) [GRDP2] [F20D10.20]	Protein of unknown function (duplicated DUF1399)				AT4G31910	Brassinosteroid-related acyltransferase 1 (EC 2.3.1.-) (BR-related acyltransferase 1) (Protein DWARF AND ROUND LEAF 1) (Protein PIZZA) [BAT1] [DRL1] [PIZ] [F10N7.280] [F11C18.110]	HXXXD-type acyl-transferase family protein
AT3G49220	Probable pectinesterase/pectinesterase inhibitor 34 [Includes: Pectinesterase inhibitor 34 (Pectin methylesterase inhibitor 34); Pectinesterase 34 (EC 3.1.1.11) (PE 34)(Pectin methylesterase 34) (AtPME34)] [PME34] [ARATH34] [F2K15.80]	Plant invertase/pectin methylesterase inhibitor superfamily	AT2G27000		cytochrome P450, family 705, subfamily A, polypeptide 8							AT4G38400	Expansin-like A2 precursor (At-EXPL2) (AtEXLA2) (AtEXPL2) (Ath-ExpBeta-2.2) [EXLA2] [EXPL2] [F22I13.170]	expansin-like A2				AT4G34770	SAUR1	SAUR-like auxin-responsive protein family
AT3G49750	Receptor-like protein 44 precursor (AtRLP44) [RLP44] [T16K5.100]	receptor like protein 44	AT2G28305	Cytokinin riboside 5'-monophosphate phosphoribohydrolase LOG1 (EC 3.2.2.n1) (Protein LONELY GUY 1) [LOG1] [T1B3.18] [T3B23.2]	Putative lysine decarboxylase family protein							AT4G38830	Cysteine-rich receptor-like protein kinase 26 precursor (EC 2.7.11.-) (Cysteine-rich RLK26) [CRK26] [T9A14.110]	cysteine-rich RLK (RECEPTOR-like protein kinase) 26				AT4G37290	PAMP-induced secreted peptide 2 precursor [PIP2] [C7A10.70]
AT3G49890			AT2G28350	Auxin response factor 10 [ARF10] [T1B3.13]	auxin response factor 10							AT4G39390	UDP-rhamnose/UDP-galactose transporter 4 (UDP-Rha/UDP-Gal transporter 4) (Bi-functional UDP-rhamnose/UDP-galactose transporter) (Nucleotide sugar transporter-KT 1) (AtNST-KT1) [URGT4] [NST-KT1] [F23K16.20]	nucleotide sugar transporter-KT 1				AT4G37295
AT3G50280	Uncharacterized acetyltransferase At3g50280 (EC 2.3.1.-) [F11C1.120]	HXXXD-type acyl-transferase family protein	AT2G28460		Cysteine/Histidine-rich C1 domain family protein							AT5G01890	Leucine-rich repeat receptor-like protein kinase PXC2 precursor (Protein PXY/TDR-CORRELATED 2) [PXC2]	Leucine-rich receptor-like protein kinase family protein				AT4G37370		cytochrome P450, family 81, subfamily D, polypeptide 8
AT3G50800			AT2G28690		Protein of unknown function (DUF1635)							AT5G03550						AT4G37590	BTB/POZ domain-containing protein NPY5 (Protein NAKED PINS IN YUC MUTANTS 5) [NPY5] [F19F18.80]	Phototropic-responsive NPH3 family protein
AT3G53450	Cytokinin riboside 5'-monophosphate phosphoribohydrolase LOG4 (EC 3.2.2.n1) (Protein LONELY GUY 4) [LOG4] [F4P12.150]	Putative lysine decarboxylase family protein	AT2G29065	Scarecrow-like protein 34 (AtSCL34) (GRAS family protein 12) (AtGRAS-12) [SCL34] [T9I4.14]	GRAS family transcription factor							AT5G03890						AT4G37890	Probable E3 ubiquitin-protein ligase EDA40 (EC 2.3.2.27) (Protein EMBRYO SAC DEVELOPMENT ARREST 40) (RING-type E3 ubiquitin transferase EDA40) [EDA40] [F20D10.10]	Zinc finger (C3HC4-type RING finger) family protein
AT3G54000			AT2G29440	Glutathione S-transferase U6 (EC 2.5.1.18) (AtGSTU6) (GST class-tau member 6) (Glutathione S-transferase 24) [GSTU6] [GST24] [F16P2.18]	glutathione S-transferase tau 6							AT5G05180						AT4G38900	bZIP transcription factor 29 (AtbZIP29) (Protein DRINK ME-LIKE) [BZIP29] [DKML] [F19H22.5]	Basic-leucine zipper (bZIP) transcription factor family protein
AT3G54950	Patatin-like protein 7 (EC 3.1.1.-) (AtPLP7) (Patatin-related phospholipase A IIIbeta) (pPLAIIIb) (Phospholipase A IIIA) (AtPLAIIIA) [PLP7] [F28P10.70]	patatin-like protein 6	AT2G30010	Protein trichome birefringence-like 45 [TBL45] [F23F1.7]	TRICHOME BIREFRINGENCE-LIKE 45							AT5G05810	RING-H2 finger protein ATL43 precursor (EC 2.3.2.27) (RING-type E3 ubiquitin transferase ATL43) [ATL43] [MJJ3.23]	RING/U-box superfamily protein				AT4G39403	Peptide POLARIS (Protein expressed in embryo 101) (AtEM101) [PLS] [EM101] [F23K16]	polaris
AT3G55740	Proline transporter 2 (AtPROT2) [PROT2] [F1I16.150]	proline transporter 2	AT2G30040		mitogen-activated protein kinase kinase kinase 14							AT5G05840		Protein of unknown function (DUF620)				AT5G02760	Probable protein phosphatase 2C 67 (EC 3.1.3.16) (AtPP2C67) [F9G14.70]	Protein phosphatase 2C family protein
AT3G56770	Putative transcription factor bHLH107 (Basic helix-loop-helix protein 107) (AtbHLH107) (bHLH 107) (Transcription factor EN 55) (bHLH transcription factor bHLH107) [BHLH107] [EN55] [T8M16.100]	basic helix-loop-helix (bHLH) DNA-binding superfamily protein	AT2G31280	Transcription factor bHLH155 (BHLH transcription factor gamma) (bHLH gamma) (Basic helix-loop-helix protein 155) (AtbHLH155) (bHLH 155) (LONESOME HIGHWAY-like protein 3)(bHLH transcription factor bHLH155) [BHLH155] [F16D14.12]	conserved peptide upstream open reading frame 7							AT5G06080	LOB domain-containing protein 33 (ASYMMETRIC LEAVES 2-like protein 24) (AS2-like protein 24) [LBD33] [ASL24] [K16F4.4]	LOB domain-containing protein 33				AT5G03640		Protein kinase superfamily protein
AT3G56800	Calmodulin-3 (CaM-3) [CAM3] [T8M16.130]	calmodulin 3	AT2G32100	Transcription repressor OFP16 (Ovate family protein 16) (AtOFP16) [OFP16] [F22D22.15]	ovate family protein 16							AT5G06430		Thioredoxin superfamily protein				AT5G04770	Cationic amino acid transporter 6, chloroplastic precursor [CAT6] [T1E3.130]	cationic amino acid transporter 6
AT3G56810			AT2G32280		Protein of unknown function (DUF1218)							AT5G06930						AT5G05090		Homeodomain-like superfamily protein
AT3G58190	LOB domain-containing protein 29 (ASYMMETRIC LEAVES 2-like protein 16) (AS2-like protein 16) [LBD29] [ASL16] [F9D24.100]	lateral organ boundaries-domain 29	AT2G33310	Auxin-responsive protein IAA13 (Indoleacetic acid-induced protein 13) [IAA13] [F4P9.8]	auxin-induced protein 13							AT5G08790	Protein ATAF2 (NAC domain-containing protein 81) (ANAC081) [NAC081] [ATAF2] [T2K12.140]	NAC (No Apical Meristem) domain transcriptional regulator superfamily protein				AT5G06400	Putative pentatricopeptide repeat-containing protein At5g06400, mitochondrial precursor [MHF15.8]	Pentatricopeptide repeat (PPR) superfamily protein
AT3G59900	Protein AUXIN-REGULATED GENE INVOLVED IN ORGAN SIZE (AtARGOS) [ARGOS] [F24G16.170]	auxin-regulated gene involved in organ size	AT2G33320		Calcium-dependent lipid-binding (CaLB domain) family protein							AT5G09430		alpha/beta-Hydrolases superfamily protein				AT5G09805	Protein IDA-LIKE 3 precursor [IDL3] [F17I14] [MYH9]	inflorescence deficient in abscission (IDA)-like 3
AT3G60647			AT2G33680	Pentatricopeptide repeat-containing protein At2g33680 [PCMP-E19] [T1B8.1]	Tetratricopeptide repeat (TPR)-like superfamily protein							AT5G09800	U-box domain-containing protein 28 (EC 2.3.2.27) (Plant U-box protein 28) (RING-type E3 ubiquitin transferase PUB28) [PUB28] [F17I14_10] [MTH16.27]	ARM repeat superfamily protein				AT5G15580	Protein LONGIFOLIA 1 (Protein TON1 RECRUITING MOTIF 2) [LNG1] [TRM2] [T20K14.190]	longifolia1
AT3G60650	Root meristem growth factor 10 precursor (AtRGF10) (CLAVATA3/ESR (CLE)-related protein CLELn) (AtCLELn) (Nuclear CLE-Like protein) [Contains: CLELn] [RGF10] [CLELn] [T4C21.60]		AT2G34080		Cysteine proteinases superfamily protein							AT5G10150	Protein SOSEKI 2 (AtSOK2) (Protein UPSTREAM OF FLC) [SOK2] [UFC] [T31P16.140]	Domain of unknown function (DUF966)				AT5G17490	DELLA protein RGL3 (GRAS family protein 27) (AtGRAS-27) (RGA-like protein 3) [RGL3] [K3M16.60]	RGA-like protein 3
AT3G60670		PLATZ transcription factor family protein	AT2G34650	Protein kinase PINOID (EC 2.7.11.1) (Protein kinase ABRUPTUS) [PID] [ABR] [T31E10.1]	Protein kinase superfamily protein							AT5G11950	Cytokinin riboside 5'-monophosphate phosphoribohydrolase LOG8 (EC 3.2.2.n1) (LOG family protein At5g11950) (Protein LONELY GUY 8) [LOG8] [F14F18.120]	Putative lysine decarboxylase family protein				AT5G18560	Ethylene-responsive transcription factor ERF086 [ERF086] [PUCHI] [T28N17.40]	Integrase-type DNA-binding superfamily protein
AT3G62100	Auxin-responsive protein IAA30 (Indoleacetic acid-induced protein 30) [IAA30] [T17J13.60]	indole-3-acetic acid inducible 30	AT2G35350	Protein phosphatase 2C 29 (EC 3.1.3.16) (AtPP2C29) (Protein POLTERGEIST-LIKE 1) (Protein phosphatase 2C PLL1) (PP2C PLL1) [PLL1] [T32F12.27]	poltergeist like 1							AT5G12050	Protein BIG GRAIN 1-like D [F14F18.220]					AT5G19530	Thermospermine synthase ACAULIS5 (EC 2.5.1.79) [ACL5] [TKV] [T20D1.50]	S-adenosyl-L-methionine-dependent methyltransferases superfamily protein
AT3G62110		Pectin lyase-like superfamily protein	AT2G35600	Protein Brevis radix-like 1 (AtBRXL1) [BRXL1] [T32F12.2]	BREVIS RADIX-like 1							AT5G12330	Protein LATERAL ROOT PRIMORDIUM 1 [LRP1] [T2L20]	Lateral root primordium (LRP) protein-related				AT5G20110		Dynein light chain type 1 family protein
AT3G63440	Cytokinin dehydrogenase 6 precursor (EC 1.5.99.12) (Cytokinin oxidase 6) (AtCKX6) (AtCKX7) (CKO6) [CKX6] [CKX7] [MAA21_70]	cytokinin oxidase/dehydrogenase 6	AT2G35743									AT5G14230						AT5G22930		Protein of unknown function (DUF1635)
AT3G63510		FMN-linked oxidoreductases superfamily protein	AT2G35990	Cytokinin riboside 5'-monophosphate phosphoribohydrolase LOG2 (EC 3.2.2.n1) (Protein LONELY GUY 2) [LOG2] [F11F19.10]	Putative lysine decarboxylase family protein							AT5G14400		cytochrome P450, family 724, subfamily A, polypeptide 1				AT5G24320		Transducin/WD40 repeat-like superfamily protein
AT4G00050	Transcription factor UNE10 (Basic helix-loop-helix protein 16) (AtbHLH16) (bHLH 16) (Protein UNFERTILIZED EMBRYO SAC 10) (Transcription factor EN 108) (bHLH transcription factor bHLH016) [UNE10] [BHLH16] [EN108] [F6N15.11]	basic helix-loop-helix (bHLH) DNA-binding superfamily protein	AT2G36220									AT5G15160	Transcription factor PRE2 (Basic helix-loop-helix protein 134) (AtbHLH134) (bHLH 134) (Protein BANQUO 2) (Protein PACLOBUTRAZOL RESISTANCE 2) (Transcription factor EN 52) (bHLH transcription factor bHLH134) [PRE2] [BHLH134] [BNQ2] [EN52] [F8M21.50]	BANQUO 2				AT5G24870		RING/U-box superfamily protein
AT4G01110			AT2G38120	Auxin transporter protein 1 (Auxin influx carrier protein 1) (Polar auxin transport inhibitor-resistant protein 1) [AUX1] [AUX] [PIR1] [WAV5] [F16M14.5]	Transmembrane amino acid transporter family protein							AT5G16200		50S ribosomal protein-related				AT5G26930	GATA transcription factor 23 [GATA23] [F2P16.190] [F2P16.9]	GATA transcription factor 23
AT4G01975		transposable element gene	AT2G39370	Probable membrane-associated kinase regulator 4 [MAKR4] [F12L6.3]								AT5G17760	AAA-ATPase At5g17760 (EC 3.6.1.-) [MVA3.12]	P-loop containing nucleoside triphosphate hydrolases superfamily protein				AT5G37890	E3 ubiquitin-protein ligase SINA-like 7 (EC 2.3.2.27) (RING-type E3 ubiquitin transferase SINA-like 7) (Seven in absentia-like protein 7) [K18L3.9]	Protein with RING/U-box and TRAF-like domains
AT4G04570	Cysteine-rich receptor-like protein kinase 40 precursor (EC 2.7.11.-) (Cysteine-rich RLK40) [CRK40] [F4H6.9]	cysteine-rich RLK (RECEPTOR-like protein kinase) 40	AT2G39380		exocyst subunit exo70 family protein H2							AT5G20540	Protein Brevis radix-like 4 (AtBRXL4) [BRXL4] [F7C8.130]	BREVIS RADIX-like 4				AT5G37940		Zinc-binding dehydrogenase family protein
AT4G08040	1-aminocyclopropane-1-carboxylate synthase 11 (EC 4.4.1.14) (ACC synthase 11) (S-adenosyl-L-methionine methylthioadenosine-lyase 11) [ACS11] [T17A2.2]	1-aminocyclopropane-1-carboxylate synthase 11	AT2G39700	Expansin-A4 precursor (AtEXPA4) (Alpha-expansin-4) (At-EXP4) (AtEx4) (Ath-ExpAlpha-1.6) [EXPA4] [EXP4] [F17A14.7]	expansin A4							AT5G20560		Glycosyl hydrolase superfamily protein				AT5G37950		UDP-Glycosyltransferase superfamily protein
AT4G09890		Protein of unknown function (DUF3511)	AT2G39870									AT5G21120	ETHYLENE INSENSITIVE 3-like 2 protein [EIL2] [T10F18.150]	ETHYLENE-INSENSITIVE3-like 2				AT5G37960		GroES-like family protein
AT4G09970			AT2G40130	Protein SMAX1-LIKE 8 (AtSMXL8) (Protein D53-like 3) (AtD53-like 3) (Protein D53-like SMXL 8) [SMXL8] [T07M07.2]	Double Clp-N motif-containing P-loop nucleoside triphosphate hydrolases superfamily protein							AT5G22050		Protein kinase superfamily protein				AT5G38200		Class I glutamine amidotransferase-like superfamily protein
AT4G10150	RING-H2 finger protein ATL7 (EC 2.3.2.27) (RING-type E3 ubiquitin transferase ATL7) [ATL7] [F28M11.70] [T9A4.19]	RING/U-box superfamily protein	AT2G41130	Transcription factor bHLH106 (Basic helix-loop-helix protein 106) (AtbHLH106) (bHLH 106) (Transcription factor EN 56) (bHLH transcription factor bHLH106) [BHLH106] [EN56] [T3K9.10]	basic helix-loop-helix (bHLH) DNA-binding superfamily protein							AT5G22560		Plant protein of unknown function (DUF247)				AT5G41400		RING/U-box superfamily protein
AT4G10160	E3 ubiquitin-protein ligase ATL59 (EC 2.3.2.27) (RING-H2 finger protein ATL59) (RING-type E3 ubiquitin transferase ATL59) [ATL59] [F28M11.80] [T9A4.20]	RING/U-box superfamily protein	AT2G41170	F-box protein At2g41170 [T3K9.6]	F-box family protein							AT5G22860		Serine carboxypeptidase S28 family protein				AT5G42030	Protein ABIL4 (Abl interactor-like protein 4) (AtABIL4) [ABIL4] [MJC20.13]	ABL interactor-like protein 4
AT4G12110	Methylsterol monooxygenase 1-1 (EC 1.14.18.9) (Sterol 4-alpha-methyl-oxidase 1-1) (AtSMO1-1) [SMO1-1] [F16J13.180]	sterol-4alpha-methyl oxidase 1-1	AT2G41510	Cytokinin dehydrogenase 1 precursor (EC 1.5.99.12) (Cytokinin oxidase 1) (AtCKX1) (CKO 1) [CKX1] [T32G6.3]	cytokinin oxidase/dehydrogenase 1							AT5G23850		Arabidopsis thaliana protein of unknown function (DUF821)				AT5G43180		Protein of unknown function, DUF599
AT4G13180		NAD(P)-binding Rossmann-fold superfamily protein	AT2G41660	Protein MIZU-KUSSEI 1 [MIZ1] [T32G6.18]	Protein of unknown function, DUF617							AT5G24920	Protein GLUTAMINE DUMPER 5 [GDU5] [F6A4.130]	glutamine dumper 5				AT5G44680		DNA glycosylase superfamily protein
AT4G13190	Probable serine/threonine-protein kinase PBL24 (EC 2.7.11.1) (PBS1-like protein 24) [PBL24] [F17N18.80]	Protein kinase superfamily protein	AT2G41820	Leucine-rich repeat receptor-like tyrosine-protein kinase PXC3 precursor (EC 2.7.10.1) (Protein PXY/TDR-CORRELATED 3) [PXC3] [T11A7.8]	Leucine-rich repeat protein kinase family protein							AT5G27000	Kinesin-like protein KIN-14G (Kinesin-like protein KatD) [KIN14G] [ATK4] [KATD] [F2P16.12]	kinesin 4				AT5G46360	Potassium inward rectifier (Kir)-like channel 3 (AtKCO3) [KCO3] [MPL12.16]	Ca2+ activated outward rectifying K+ channel 3
AT4G13195	CLAVATA3/ESR (CLE)-related protein 44 precursor (Tracheary element differentiation inhibitory factor-like protein) (TDIF-like protein) [Contains: CLE44p] [CLE44] [F17N18]	CLAVATA3/ESR-RELATED 44	AT2G42380	Basic leucine zipper 34 (AtbZIP34) (bZIP protein 34) [BZIP34] [MHK10.10]	Basic-leucine zipper (bZIP) transcription factor family protein							AT5G36960						AT5G47800	BTB/POZ domain-containing protein At5g47800 [MCA23.12]	Phototropic-responsive NPH3 family protein
AT4G13790	SAUR25	SAUR-like auxin-responsive protein family	AT2G42430	LOB domain-containing protein 16 (ASYMMETRIC LEAVES 2-like protein 18) (AS2-like protein 18) [LBD16] [ASL18] [MHK10.15]	lateral organ boundaries-domain 16							AT5G39850	40S ribosomal protein S9-2 [RPS9C] [MYH19.1] [MYH19.10]	Ribosomal protein S4				AT5G49630	Amino acid permease 6 (Amino acid transporter AAP6) [AAP6] [MNI5.1]	amino acid permease 6
AT4G14550	Auxin-responsive protein IAA14 (Indoleacetic acid-induced protein 14) (Protein SOLITARY ROOT) [IAA14] [SLR1] [dl3315c] [FCAALL.254]	indole-3-acetic acid inducible 14	AT2G42440	LOB domain-containing protein 17 (ASYMMETRIC LEAVES 2-like protein 15) (AS2-like protein 15) [LBD17] [ASL15] [MHK10.16]	Lateral organ boundaries (LOB) domain family protein							AT5G40630		Ubiquitin-like superfamily protein				AT5G50915	Transcription factor bHLH137 (Basic helix-loop-helix protein 137) (AtbHLH137) (bHLH 137) (Transcription factor EN 89) (bHLH transcription factor bHLH137) [BHLH137] [EN89] [K3K7]	basic helix-loop-helix (bHLH) DNA-binding superfamily protein
AT4G14560	Auxin-responsive protein IAA1 (Indoleacetic acid-induced protein 1) [IAA1] [dl3320w] [FCAALL.409]	indole-3-acetic acid inducible	AT2G43060	Transcription factor IBH1 (AtIBH1) (BHLH transcription factor zeta) (bHLH zeta) (Basic helix-loop-helix protein 158) (AtbHLH158) (bHLH 158) (Protein ILI1-BINDING BHLH 1)(bHLH transcription factor bHLH158) [IBH1] [BHLH158] [MFL8.8]	ILI1 binding bHLH 1							AT5G40910		Disease resistance protein (TIR-NBS-LRR class) family				AT5G51380	F-box protein At5g51380 [MFG13.9]	RNI-like superfamily protein
AT4G14819		Protein of unknown function (DUF1677)	AT2G43860	Probable polygalacturonase At2g43860 precursor (EC 3.2.1.15) (PG) (Pectinase At2g43860) [F18O19.3]	Pectin lyase-like superfamily protein							AT5G41663		MIR319/MIR319B; miRNA				AT5G51810	Gibberellin 20 oxidase 2 (EC 1.14.11.-) (GA 20-oxidase 2) (Gibberellin C-20 oxidase 2) [GA20OX2] [20ox] [At2353] [MIO24.5]	gibberellin 20 oxidase 2
AT4G15320	Cellulose synthase-like protein B6 (EC 2.4.1.-) (AtCslB6) [CSLB6] [dl3705c] [FCAALL.268]	cellulose synthase-like B6	AT2G44230		Plant protein of unknown function (DUF946)							AT5G42040	Putative 26S proteasome non-ATPase regulatory subunit 8 homolog B (26S proteasome regulatory subunit RPN12b) (AtRPN12b) (26S proteasome regulatory subunit S14 homolog B)[RPN12B] [MJC20.14]	regulatory particle non-ATPase 12B				AT5G52890		AT hook motif-containing protein
AT4G16515	Protein GOLVEN 1 precursor (CLAVATA3/ESR (CLE)-related protein CLEL6) (CLE-Like protein 6) (Root meristem growth factor 6) (AtRGF6) [Contains: GLV1p] [GLV1] [CLEL6] [RGF6] [FCAALL]		AT2G44990	Carotenoid cleavage dioxygenase 7, chloroplastic precursor (AtCCD7) (AtNCED7) (Beta,beta-carotene 9',10'-oxygenase) (EC 1.13.11.68) (Protein MORE AXILLARY BRANCHING 3) (Protein MORE AXILLARY GROWTH 3) [CCD7] [MAX3] [NCED7] [T14P1.21]	carotenoid cleavage dioxygenase 7							AT5G42410	SAUR43	SAUR-like auxin-responsive protein family				AT5G52900	Probable membrane-associated kinase regulator 6 [MAKR6] [MXC20.13]
AT4G17350		Plant protein of unknown function (DUF828) with plant pleckstrin homology-like region	AT2G45420	LOB domain-containing protein 18 (ASYMMETRIC LEAVES 2-like protein 20) (AS2-like protein 20) [LBD18] [ASL20] [F4L23.7]	LOB domain-containing protein 18							AT5G42750	BRI1 kinase inhibitor 1 [BKI1] [MJB21.13]	BRI1 kinase inhibitor 1				AT5G54470		B-box type zinc finger family protein
AT4G17460	Homeobox-leucine zipper protein HAT1 (Homeodomain-leucine zipper protein HAT1) (HD-ZIP protein 1) [HAT1] [dl4765w] [FCAALL.65]	Homeobox-leucine zipper protein 4 (HB-4) / HD-ZIP protein	AT2G46570	Laccase-6 precursor (EC 1.10.3.2) (Benzenediol:oxygen oxidoreductase 6) (Diphenol oxidase 6) (Urishiol oxidase 6) [LAC6] [F13A10.10]	laccase 6							AT5G43450	1-aminocyclopropane-1-carboxylate oxidase homolog 10 (EC 1.14.-.-) [MWF20.16]	2-oxoglutarate (2OG) and Fe(II)-dependent oxygenase superfamily protein				AT5G54490	Calcium-binding protein PBP1 (KIC-related protein 2) (PINOID-binding protein 1) [PBP1] [KRP2] [F24B18.11]	pinoid-binding protein 1
AT4G17615	Calcineurin B-like protein 1 (SOS3-like calcium-binding protein 5) [CBL1] [SCABP5] [dl4845w] [FCAALL.122]	calcineurin B-like protein 1	AT2G46810	Transcription factor bHLH70 (Basic helix-loop-helix protein 70) (AtbHLH70) (bHLH 70) (Transcription factor EN 13) (bHLH transcription factor bHLH070) [BHLH70] [EN13] [F19D11.9]	basic helix-loop-helix (bHLH) DNA-binding superfamily protein							AT5G43690	Cytosolic sulfotransferase 1 (EC 2.8.2.-) (AtSOT1) [SOT1] [MQD19.2]	P-loop containing nucleoside triphosphate hydrolases superfamily protein				AT5G54500	NAD(P)H dehydrogenase (quinone) FQR1 (EC 1.6.5.2) (Flavodoxin-like quinone reductase 1) [FQR1] [F24B18.12]	flavodoxin-like quinone reductase 1
AT4G17695	Probable transcription factor KAN3 (Protein KANADI 3) [KAN3] [FCAALL]	Homeodomain-like superfamily protein	AT2G47130	Short-chain dehydrogenase reductase 3a (EC 1.1.1.-) (AtSDR3a) [SDR3a] [SDR3] [SDR4] [F14M4]	NAD(P)-binding Rossmann-fold superfamily protein							AT5G44250		Protein of unknown function DUF829, transmembrane 53				AT5G54510	Indole-3-acetic acid-amido synthetase GH3.6 (EC 6.3.2.-) (Auxin-responsive GH3-like protein 6) (AtGH3-6) (Protein DWARF IN LIGHT 1) (DFL-1) [GH3.6] [DFL1] [F24B18.13]	Auxin-responsive GH3 family protein
AT4G17770	Alpha,alpha-trehalose-phosphate synthase [UDP-forming] 5 (EC 2.4.1.15) (Trehalose-6-phosphate synthase 5) (AtTPS5) [TPS5] [dl4920W] [FCAALL.9]	trehalose phosphatase/synthase 5	AT2G47140	Short-chain dehydrogenase reductase 3b (EC 1.1.1.-) (AtSDR3b) [SDR3b] [SDR3] [SDR5] [F14M4]	NAD(P)-binding Rossmann-fold superfamily protein							AT5G44260	Zinc finger CCCH domain-containing protein 61 (AtC3H61) (Tandem CCCH Zinc Finger protein 5) (AtTZF5) [TZF5] [K9L2.1]	Zinc finger C-x8-C-x5-C-x3-H type family protein				AT5G56730	Zinc protease PQQL-like (EC 3.4.24.-) [MIK19.18]	Insulinase (Peptidase family M16) protein
AT4G20230	Terpenoid synthase 9 (EC 4.2.3.-) (AtTPS09) [TPS09] [F1C12.150]	Terpenoid cyclases/Protein prenyltransferases superfamily protein	AT2G47560	RING-H2 finger protein ATL64 (EC 2.3.2.27) (RING-type E3 ubiquitin transferase ATL64) [ATL64] [T30B22.14]	RING/U-box superfamily protein							AT5G46370	Two-pore potassium channel 2 (AtTPK2) (Calcium-activated outward-rectifying potassium channel 2) (AtKCO2) [TPK2] [KCO2] [MPL12.17]	Ca2+ activated outward rectifying K+ channel 2				AT5G56970	Cytokinin dehydrogenase 3 precursor (EC 1.5.99.12) (Cytokinin oxidase 3) (AtCKX3) (CKO 3) [CKX3] [MHM17.8]	cytokinin oxidase 3
AT4G21200	Gibberellin 2-beta-dioxygenase 8 (EC 1.14.11.13) (GA 2-oxidase 8) (Gibberellin 2-beta-hydroxylase 8) (Gibberellin 2-oxidase 8) [GA2OX8] [F7J7.140]	gibberellin 2-oxidase 8	AT2G47860	BTB/POZ domain-containing protein SETH6 [SETH6] [F17A22.25]	Phototropic-responsive NPH3 family protein							AT5G47060	FCS-Like Zinc finger 1 [FLZ1] [DUF581-16] [MQD22.20]	Protein of unknown function (DUF581)				AT5G57340
AT4G21730			AT2G47890	Zinc finger protein CONSTANS-LIKE 13 [COL13] [F17A22.28] [T9J23]	B-box type zinc finger protein with CCT domain							AT5G50335						AT5G58580	RING-H2 finger protein ATL63 (EC 2.3.2.27) (Protein ARABIDOPSIS TOXICOS EN LEVADURA 63) (Protein ATL63) (RING-type E3 ubiquitin transferase ATL63) [ATL63] [MZN1.3]	TOXICOS EN LEVADURA 63
AT4G21740			AT3G02000	Glutaredoxin-C7 (AtGrxC7) (Protein ROXY 1) [GRXC7] [AT.I.24-1] [ROXY1] [F1C9.22] [F28J7.33]	Thioredoxin superfamily protein							AT5G51790	Transcription factor bHLH120 (Basic helix-loop-helix protein 120) (AtbHLH120) (bHLH 120) (Transcription factor EN 4) (bHLH transcription factor bHLH120) [BHLH120] [EN4][MIO24.8]	basic helix-loop-helix (bHLH) DNA-binding superfamily protein				AT5G59010	Serine/threonine-protein kinase BSK5 (EC 2.7.11.1) (Brassinosteroid-signaling kinase 5) [BSK5] [K19M22.7]	Protein kinase protein with tetratricopeptide repeat domain
AT4G21745	CRIB domain-containing protein RIC11 (ROP-interactive CRIB motif-containing protein 11) (Target of ROP protein RIC11) [RIC11] [F17L22]	PAK-box/P21-Rho-binding family protein	AT3G02493	Small polypeptide DEVIL 2 (Small polypeptide ROTUNDIFOLIA like 19) (Small polypeptide ROT-FOUR-LIKE 19) [DVL2] [RTFL19] [F16B3]	ROTUNDIFOLIA like 19							AT5G52870	Membrane-associated kinase regulator 5 [MAKR5] [MXC20.9]					AT5G59360	Cyclin-dependent protein kinase inhibitor SMR14 (Cyclin-dependent protein kinase inhibitor SMR13) (Protein SIAMESE-RELATED 13) (Protein SIAMESE-RELATED 14) [SMR14] [SMR13] [F2O15.2]
AT4G22530		S-adenosyl-L-methionine-dependent methyltransferases superfamily protein	AT3G02670		Glycine-rich protein family							AT5G53900		Serine/threonine-protein kinase WNK (With No Lysine)-related				AT5G59510	Small polypeptide DEVIL 18 (Small polypeptide ROTUNDIFOLIA LIKE 5) (Small polypeptide ROT-FOUR-LIKE 5) [DVL18] [RTFL5] [F2O15.21]	ROTUNDIFOLIA like 5
AT4G22780	ACT domain-containing protein ACR7 (Protein ACT DOMAIN REPEATS 7) [ACR7] [T12H17.170]	ACT domain repeat 7	AT3G02885	Gibberellin-regulated protein 5 precursor (GAST1 protein homolog 5) [GASA5] [F13E7]	GAST1 protein homolog 5							AT5G54130		Calcium-binding endonuclease/exonuclease/phosphatase family				AT5G60450	Auxin response factor 4 [ARF4] [MUF9.8]	auxin response factor 4
AT4G23340		2-oxoglutarate (2OG) and Fe(II)-dependent oxygenase superfamily protein	AT3G03170									AT5G54585						AT5G62000	Auxin response factor 2 (ARF1-binding protein) (ARF1-BP) (Protein MEGAINTEGUMENTA) [ARF2] [MNT] [MTG10.3]	auxin response factor 2
AT4G24275			AT3G03660	WUSCHEL-related homeobox 11 [WOX11] [T12J13.6]	WUSCHEL related homeobox 11							AT5G57100	Nucleotide-sugar uncharacterized transporter 1 [MUL3.4]	Nucleotide/sugar transporter family protein				AT5G65670	Auxin-responsive protein IAA9 (Indoleacetic acid-induced protein 9) [IAA9] [F6H11.210] [MPA24.1]	indole-3-acetic acid inducible 9
AT4G25420	Gibberellin 20 oxidase 1 (EC 1.14.11.-) (GA 20-oxidase 1) (AtGA20ox1) (Gibberellin C-20 oxidase 1) [GA20OX1] [20ox1] [At2301] [GA5] [T30C3.90]	2-oxoglutarate (2OG) and Fe(II)-dependent oxygenase superfamily protein	AT3G03820	SAUR29	SAUR-like auxin-responsive protein family							AT5G57520	Zinc finger protein 2 (AtZFP2) [ZFP2] [MUA2.9]	zinc finger protein 2				AT5G66260	SAUR11	SAUR-like auxin-responsive protein family
AT4G26540	LRR receptor-like serine/threonine-protein kinase RGI3 precursor (EC 2.7.11.1) (Protein RECEPTOR OF RGF1 1) (Protein RGF1 INSENSITIVE 3) [RGI3] [RGFR1] [RGFR3] [M3E9.30]	Leucine-rich repeat receptor-like protein kinase family protein	AT3G03830	SAUR28	SAUR-like auxin-responsive protein family							AT5G58620	Zinc finger CCCH domain-containing protein 66 (AtC3H66) [MZN1.16] [MZN1.8]	zinc finger (CCCH-type) family protein				AT5G66590		CAP (Cysteine-rich secretory proteins, Antigen 5, and Pathogenesis-related 1 protein) superfamily protein
AT4G27240		zinc finger (C2H2 type) family protein	AT3G03840	SAUR27	SAUR-like auxin-responsive protein family							AT5G59240	40S ribosomal protein S8-2 [RPS8B] [MNC17.15]	Ribosomal protein S8e family protein				AT5G67430		Acyl-CoA N-acyltransferases (NAT) superfamily protein
AT4G27260	Indole-3-acetic acid-amido synthetase GH3.5 (EC 6.3.2.-) (Auxin-responsive GH3-like protein 5) (AtGH3-5) [GH3.5] [M4I22.70]	Auxin-responsive GH3 family protein	AT3G03850	SAUR26	SAUR-like auxin-responsive protein family							AT5G62170						ATCG00750	30S ribosomal protein S11, chloroplastic [rps11]	ribosomal protein S11
AT4G27290	G-type lectin S-receptor-like serine/threonine-protein kinase At4g27290 precursor (EC 2.7.11.1) [M4I22.100]	S-locus lectin protein kinase family protein	AT3G04570	AT-hook motif nuclear-localized protein 19 [AHL19] [F7O18.4]	AT-hook motif nuclear-localized protein 19							AT5G62280		Protein of unknown function (DUF1442)				ATMG00090	Ribosomal protein S3, mitochondrial [RPS3]	structural constituent of ribosome;protein binding
AT4G27300	G-type lectin S-receptor-like serine/threonine-protein kinase SD1-1 precursor (EC 2.7.11.1) (S-domain-1 (SD1) receptor kinase 1) (SD1-1) [SD11] [M4I22.110]	S-locus lectin protein kinase family protein	AT3G04730	Auxin-responsive protein IAA16 (Indoleacetic acid-induced protein 16) [IAA16] [F7O18.22]	indoleacetic acid-induced protein 16							AT5G63790	NAC domain-containing protein 102 (ANAC102) [NAC102] [MBK5.27]	NAC domain containing protein 102
AT4G28490	Receptor-like protein kinase 5 precursor (EC 2.7.10.1) (EC 2.7.11.1) (Protein HAESA) [RLK5] [HAE] [F21O9.180]	Leucine-rich receptor-like protein kinase family protein	AT3G04770	40S ribosomal protein Sa-2 (p40 protein homolog) [RPSaB] [F7O18.26]	40s ribosomal protein SA B							AT5G64780		Uncharacterised conserved protein UCP009193
AT4G28640	Auxin-responsive protein IAA11 (Indoleacetic acid-induced protein 11) [IAA11] [T5F17.90]	indole-3-acetic acid inducible 11	AT3G06370	Sodium/hydrogen exchanger 3 (Na(+)/H(+) exchanger 3) (NHE-3) [NHX3] [F24P17.16]	sodium hydrogen exchanger 4							AT5G65100	ETHYLENE INSENSITIVE 3-like 5 protein [EIL5] [MQN23.3]	Ethylene insensitive 3 family protein
AT4G28790	Transcription factor bHLH23 (Basic helix-loop-helix protein 23) (AtbHLH23) (bHLH 23) (Transcription factor EN 107) (bHLH transcription factor bHLH023) [BHLH23] [EN107] [F16A16.100]	basic helix-loop-helix (bHLH) DNA-binding superfamily protein	AT3G06490	Transcription factor MYB108 (Myb-related protein 108) (AtMYB108) (Protein BOTRYTIS-SUSCEPTIBLE 1) [MYB108] [BOS1] [F5E6.18]	myb domain protein 108							AT5G65510	AP2-like ethylene-responsive transcription factor AIL7 (Protein AINTEGUMENTA-LIKE 7) [AIL7] [K21L13.1]	AINTEGUMENTA-like 7
AT4G31630	Putative B3 domain-containing protein REM4 (Protein REPRODUCTIVE MERISTEM 4) [REM4] [F28M20.180]	Transcriptional factor B3 family protein	AT3G06868									AT5G65610
AT4G31910	Brassinosteroid-related acyltransferase 1 (EC 2.3.1.-) (BR-related acyltransferase 1) (Protein DWARF AND ROUND LEAF 1) (Protein PIZZA) [BAT1] [DRL1] [PIZ] [F10N7.280] [F11C18.110]	HXXXD-type acyl-transferase family protein	AT3G07000		Cysteine/Histidine-rich C1 domain family protein							AT5G65800	1-aminocyclopropane-1-carboxylate synthase 5 (EC 4.4.1.14) (ACC synthase 5) (Ethylene-overproduction protein 2) (S-adenosyl-L-methionine methylthioadenosine-lyase 5) [ACS5] [ACC5] [ETO2] [F6H11.90] [MPA24.15]	ACC synthase 5
AT4G32280	Auxin-responsive protein IAA29 (Indoleacetic acid-induced protein 29) [IAA29] [F10M6.80]	indole-3-acetic acid inducible 29	AT3G07390	Auxin-induced in root cultures protein 12 precursor [AIR12] [F21O3_10]	auxin-responsive family protein							AT5G66080	Probable protein phosphatase 2C 79 precursor (EC 3.1.3.16) (AtPP2C79) [K2A18.16]	Protein phosphatase 2C family protein
AT4G34760	SAUR50	SAUR-like auxin-responsive protein family	AT3G10870	Methylesterase 17 (EC 3.1.1.-) (AtMES17) (Methyl indole-3-acetic acid esterase) [MES17] [T7M13.5]	methyl esterase 17							AT5G66300	NAC domain-containing protein 105 (ANAC105) (Protein VASCULAR RELATED NAC-DOMAIN 3) [NAC105] [VND3] [K1L20.8]	NAC domain containing protein 105
AT4G34770	SAUR1	SAUR-like auxin-responsive protein family	AT3G11150		2-oxoglutarate (2OG) and Fe(II)-dependent oxygenase superfamily protein							AT5G66940	Dof zinc finger protein DOF5.8 (AtDOF5.8) [DOF5.8] [K8A10.1]	Dof-type zinc finger DNA-binding family protein
AT4G36110	SAUR9	SAUR-like auxin-responsive protein family	AT3G11340	UDP-glycosyltransferase 76B1 (EC 2.4.1.-) [UGT76B1] [F11B9.23] [F24K9.1]	UDP-Glycosyltransferase superfamily protein
AT4G37290	PAMP-induced secreted peptide 2 precursor [PIP2] [C7A10.70]		AT3G11750	Dihydroneopterin aldolase 1 (EC 4.1.2.25) (DHNA1) (7,8-dihydroneopterin aldolase) (AtFolB1) [FOLB1] [F26K24.4]	Dihydroneopterin aldolase
AT4G37295			AT3G12670		CTP synthase family protein
AT4G37370		cytochrome P450, family 81, subfamily D, polypeptide 8	AT3G13000		Protein of unknown function, DUF547
AT4G37390	Indole-3-acetic acid-amido synthetase GH3.2 (EC 6.3.2.-) (Auxin-responsive GH3-like protein 2) (AtGH3-2) (Protein YADOKARI 1) [GH3.2] [BRU6] [CF4] [YDK1] [F6G17.40]	Auxin-responsive GH3 family protein	AT3G13310		Chaperone DnaJ-domain superfamily protein
AT4G37590	BTB/POZ domain-containing protein NPY5 (Protein NAKED PINS IN YUC MUTANTS 5) [NPY5] [F19F18.80]	Phototropic-responsive NPH3 family protein	AT3G13380	Receptor-like protein kinase BRI1-like 3 precursor (EC 2.7.10.1) (EC 2.7.11.1) (BRASSINOSTEROID INSENSITIVE 1-like protein 3) [BRL3] [MRP15.1]	BRI1-like 3
AT4G37770	1-aminocyclopropane-1-carboxylate synthase 8 (EC 4.4.1.14) (ACC synthase 8) (S-adenosyl-L-methionine methylthioadenosine-lyase 8) [ACS8] [T28I19.50]	1-amino-cyclopropane-1-carboxylate synthase 8	AT3G13810	Protein indeterminate-domain 11 [IDD11] [MCP4.2]	indeterminate(ID)-domain 11
AT4G37890	Probable E3 ubiquitin-protein ligase EDA40 (EC 2.3.2.27) (Protein EMBRYO SAC DEVELOPMENT ARREST 40) (RING-type E3 ubiquitin transferase EDA40) [EDA40] [F20D10.10]	Zinc finger (C3HC4-type RING finger) family protein	AT3G14362	Small polypeptide DEVIL 19 (Small polypeptide ROTUNDIFOLIA LIKE 10) (Small polypeptide ROT-FOUR-LIKE 10) [DVL19] [RTFL10] [MLN21]	ROTUNDIFOLIA like 10
AT4G38840	SAUR14	SAUR-like auxin-responsive protein family	AT3G14370	Serine/threonine-protein kinase WAG2 (EC 2.7.11.1) [WAG2] [MLN21.15]	Protein kinase superfamily protein
AT4G38850	SAUR15	SAUR-like auxin-responsive protein family	AT3G14440	9-cis-epoxycarotenoid dioxygenase NCED3, chloroplastic precursor (EC 1.13.11.51) (AtNCED3) (Protein SALT TOLERANT 1) [NCED3] [STO1] [MOA2.4]	nine-cis-epoxycarotenoid dioxygenase 3
AT4G38900	bZIP transcription factor 29 (AtbZIP29) (Protein DRINK ME-LIKE) [BZIP29] [DKML] [F19H22.5]	Basic-leucine zipper (bZIP) transcription factor family protein	AT3G15250
AT4G39403	Peptide POLARIS (Protein expressed in embryo 101) (AtEM101) [PLS] [EM101] [F23K16]	polaris	AT3G15540	Auxin-responsive protein IAA19 (Indoleacetic acid-induced protein 19) (Protein MASSUGU 2) [IAA19] [MSG2] [MJK13.20]	indole-3-acetic acid inducible 19
AT5G01840	Transcription repressor OFP1 (Ovate family protein 1) (AtOFP1) [OFP1] [T20L15.110]	ovate family protein 1	AT3G16500	Auxin-responsive protein IAA26 (Indoleacetic acid-induced protein 26) (Phytochrome-associated protein 1) [IAA26] [PAP1] [MDC8.13]	phytochrome-associated protein 1
AT5G02760	Probable protein phosphatase 2C 67 (EC 3.1.3.16) (AtPP2C67) [F9G14.70]	Protein phosphatase 2C family protein	AT3G16870	GATA transcription factor 17 [GATA17] [MUH15.3]	GATA transcription factor 17
AT5G03640		Protein kinase superfamily protein	AT3G17090	Probable protein phosphatase 2C 42 (EC 3.1.3.16) (AtPP2C42) [K14A17.16] [K14A17.4]	Protein phosphatase 2C family protein
AT5G04770	Cationic amino acid transporter 6, chloroplastic precursor [CAT6] [T1E3.130]	cationic amino acid transporter 6	AT3G18200	WAT1-related protein At3g18200 [MRC8.20]	nodulin MtN21 /EamA-like transporter family protein
AT5G04980	Type I inositol polyphosphate 5-phosphatase 10 (EC 3.1.3.-) (At5PTase10) [IP5P10] [MUG13.16]	DNAse I-like superfamily protein	AT3G18710	U-box domain-containing protein 29 (EC 2.3.2.27) (Plant U-box protein 29) (RING-type E3 ubiquitin transferase PUB29) [PUB29] [MVE11.7]	plant U-box 29
AT5G05090		Homeodomain-like superfamily protein	AT3G18950		Transducin/WD40 repeat-like superfamily protein
AT5G06400	Putative pentatricopeptide repeat-containing protein At5g06400, mitochondrial precursor [MHF15.8]	Pentatricopeptide repeat (PPR) superfamily protein	AT3G19200
AT5G09805	Protein IDA-LIKE 3 precursor [IDL3] [F17I14] [MYH9]	inflorescence deficient in abscission (IDA)-like 3	AT3G19300		Protein kinase superfamily protein
AT5G13930	Chalcone synthase (EC 2.3.1.74) (Naringenin-chalcone synthase) (Protein TRANSPARENT TESTA 4) [CHS] [TT4] [MAC12.11] [MAC12.14]	Chalcone and stilbene synthase family protein	AT3G19310		PLC-like phosphodiesterases superfamily protein
AT5G15580	Protein LONGIFOLIA 1 (Protein TON1 RECRUITING MOTIF 2) [LNG1] [TRM2] [T20K14.190]	longifolia1	AT3G20460	Putative sugar transporter ERD6-like 13 [MQC12.5]	Major facilitator superfamily protein
AT5G17490	DELLA protein RGL3 (GRAS family protein 27) (AtGRAS-27) (RGA-like protein 3) [RGL3] [K3M16.60]	RGA-like protein 3	AT3G20830	Serine/threonine-protein kinase UCNL (EC 2.7.11.1) (AGC serine/threonine-protein kinase subfamily 2 member 4) (Protein UNICORN-LIKE) [UCNL] [AGC2-4] [MOE17.14]	AGC (cAMP-dependent, cGMP-dependent and protein kinase C) kinase family protein
AT5G18010	SAUR19	SAUR-like auxin-responsive protein family	AT3G21320
AT5G18020	SAUR20	SAUR-like auxin-responsive protein family	AT3G21420		2-oxoglutarate (2OG) and Fe(II)-dependent oxygenase superfamily protein
AT5G18030	SAUR21	SAUR-like auxin-responsive protein family	AT3G21700		Ras-related small GTP-binding family protein
AT5G18050	SAUR22	SAUR-like auxin-responsive protein family	AT3G22100	Transcription factor bHLH117 (Basic helix-loop-helix protein 117) (AtbHLH117) (bHLH 117) (Transcription factor EN 140) (bHLH transcription factor bHLH117) [BHLH117] [EN140] [MZN24.31]	basic helix-loop-helix (bHLH) DNA-binding superfamily protein
AT5G18060	SAUR23	SAUR-like auxin-responsive protein family	AT3G22820	EPIDERMAL PATTERNING FACTOR-like protein 5 precursor (EPF-like protein 5) [Contains: CHALLAH-LIKE1] [EPFL5] [CLL1] [MWI23.19]	allergen-related
AT5G18070	Phosphoacetylglucosamine mutase (EC 5.4.2.3) (PAGM) (Acetylglucosamine phosphomutase) (DNA-damage-repair/toleration protein DRT101) (N-acetylglucosamine-phosphate mutase) [DRT101] [MRG7.2]	phosphoglucosamine mutase-related	AT3G23030	Auxin-responsive protein IAA2 (Indoleacetic acid-induced protein 2) [IAA2] [MXC7.6]	indole-3-acetic acid inducible 2
AT5G18080	SAUR24	SAUR-like auxin-responsive protein family	AT3G23340	Casein kinase 1-like protein 10 (EC 2.7.11.1) (Protein CASEIN KINASE I-LIKE 10) [CKL10] [CKI2] [MLM24.7]	casein kinase I-like 10
AT5G18560	Ethylene-responsive transcription factor ERF086 [ERF086] [PUCHI] [T28N17.40]	Integrase-type DNA-binding superfamily protein	AT3G23635	Small polypeptide DEVIL 23 (Small polypeptide ROTUNDIFOLIA LIKE 13) (Small polypeptide ROT-FOUR-LIKE 13) [DVL23] [RTFL13] [MDB19]	ROTUNDIFOLIA like 13
AT5G18930	S-adenosylmethionine decarboxylase proenzyme 4 precursor (EC 4.1.1.50) (AdoMetDC4) [Contains: S-adenosylmethionine decarboxylase 1 alpha chain; S-adenosylmethionine decarboxylase 1 beta chain (Protein BUSHY AND DWARF 2)] [SAMDC4] [BUD2]	Adenosylmethionine decarboxylase family protein	AT3G23637	Small polypeptide DEVIL 21 (Small polypeptide ROTUNDIFOLIA LIKE 23) (Small polypeptide ROT-FOUR-LIKE 23) [DVL21] [RTFL23] [MDB19]	DVL family protein
AT5G19530	Thermospermine synthase ACAULIS5 (EC 2.5.1.79) [ACL5] [TKV] [T20D1.50]	S-adenosyl-L-methionine-dependent methyltransferases superfamily protein	AT3G23640		heteroglycan glucosidase 1
AT5G20110		Dynein light chain type 1 family protein	AT3G25130
AT5G22930		Protein of unknown function (DUF1635)	AT3G25620	ABC transporter G family member 21 (ABC transporter ABCG.21) (AtABCG21) (White-brown complex homolog protein 21) (AtWBC21) [ABCG21] [WBC21] [T5M7.6]	ABC-2 type transporter family protein
AT5G24320		Transducin/WD40 repeat-like superfamily protein	AT3G25710	Transcription factor AIG1 (AtAIG1) (Basic helix-loop-helix protein 32) (AtbHLH32) (bHLH 32) (Protein TARGET OF MOOPTEROS 5) (Transcription factor EN 54) (bHLH transcription factor bHLH032) [BHLH32] [EN54] [TMO5] [K13N2.1]	basic helix-loop-helix 32
AT5G24870		RING/U-box superfamily protein	AT3G25717	Small polypeptide DEVIL 6 (Small polypeptide ROTUNDIFOLIA LIKE 16) (Small polypeptide ROT-FOUR-LIKE 16) [DVL6] [RTFL16] [K13N2]	ROTUNDIFOLIA like 16
AT5G26930	GATA transcription factor 23 [GATA23] [F2P16.190] [F2P16.9]	GATA transcription factor 23	AT3G25730	AP2/ERF and B3 domain-containing transcription factor ARF14 (Protein AUXIN RESPONSE FACTOR 14) (RAV1-like ethylene-responsive transcription factor ARF14) [ARF14] [K13N2.14] [K13N2.7]	ethylene response DNA binding factor 3
AT5G37890	E3 ubiquitin-protein ligase SINA-like 7 (EC 2.3.2.27) (RING-type E3 ubiquitin transferase SINA-like 7) (Seven in absentia-like protein 7) [K18L3.9]	Protein with RING/U-box and TRAF-like domains	AT3G25882	Protein NIM1-INTERACTING 2 (Protein NIMIN-2) [NIMIN-2] [MPE11.4]	NIM1-interacting 2
AT5G37940		Zinc-binding dehydrogenase family protein	AT3G25900	Homocysteine S-methyltransferase 1 (EC 2.1.1.10) (S-methylmethionine:homocysteine methyltransferase 1) (AtHMT-1) (SMM:Hcy S-methyltransferase 1) [HMT-1] [MPE11.5] [MPE11.6]	Homocysteine S-methyltransferase family protein
AT5G37950		UDP-Glycosyltransferase superfamily protein	AT3G25930		Adenine nucleotide alpha hydrolases-like superfamily protein
AT5G37960		GroES-like family protein	AT3G26080	Probable plastid-lipid-associated protein 5, chloroplastic precursor (Fibrillin-3b) [PAP5] [FBN3b] [FIB3b] [MPE11.25]	plastid-lipid associated protein PAP / fibrillin family protein
AT5G38200		Class I glutamine amidotransferase-like superfamily protein	AT3G26760		NAD(P)-binding Rossmann-fold superfamily protein
AT5G39860	Transcription factor PRE1 (Basic helix-loop-helix protein 136) (AtbHLH136) (bHLH 136) (Protein BANQUO 1) (Protein PACLOBUTRAZOL RESISTANCE 1) (bHLH transcription factorbHLH136) [PRE1] [BHLH136] [BNQ1] [MYH19.1]	basic helix-loop-helix (bHLH) DNA-binding family protein	AT3G27500		Cysteine/Histidine-rich C1 domain family protein
AT5G41400		RING/U-box superfamily protein	AT3G28420		Putative membrane lipoprotein
AT5G42030	Protein ABIL4 (Abl interactor-like protein 4) (AtABIL4) [ABIL4] [MJC20.13]	ABL interactor-like protein 4	AT3G28455	CLAVATA3/ESR (CLE)-related protein 25 precursor [Contains: CLE25p] [CLE25] [MFJ20]	CLAVATA3/ESR-RELATED 25
AT5G43180		Protein of unknown function, DUF599	AT3G28857	Transcription factor PRE5 (Basic helix-loop-helix protein 164) (AtbHLH164) (bHLH 164) (Protein PACLOBUTRAZOL RESISTANCE 5) (bHLH transcription factor bHLH164) [PRE5] [BHLH164] [MLD15.1]	basic helix-loop-helix (bHLH) DNA-binding family protein
AT5G43700	Auxin-responsive protein IAA4 (Auxin-induced protein AUX2-11) (Indoleacetic acid-induced protein 4) [IAA4] [AUX2-11] [MQD19.3]	AUX/IAA transcriptional regulator family protein	AT3G29370
AT5G44680		DNA glycosylase superfamily protein	AT3G42800	Protein BIG GRAIN 1-like C [T21C14.20]
AT5G46240	Potassium channel KAT1 [KAT1] [MPL12.2]	potassium channel in Arabidopsis thaliana 1	AT3G44350	Putative NAC domain-containing protein 61 (ANAC061) [NAC061] [T22K7.30]	NAC domain containing protein 61
AT5G46360	Potassium inward rectifier (Kir)-like channel 3 (AtKCO3) [KCO3] [MPL12.16]	Ca2+ activated outward rectifying K+ channel 3	AT3G44610		Protein kinase superfamily protein
AT5G47370	Homeobox-leucine zipper protein HAT2 (Homeodomain-leucine zipper protein HAT2) (HD-ZIP protein 2) [HAT2] [MQL5.23]	Homeobox-leucine zipper protein 4 (HB-4) / HD-ZIP protein	AT3G44735	Putative phytosulfokines 6 precursor (AtPSK3_2) (AtPSK6) [Contains: Phytosulfokine-alpha-like (PSK-alpha-like) (Phytosulfokine-a-like); Phytosulfokine-beta (PSK-beta) (Phytosulfokine-b)] [PSK6] [PSK3] [T32N15.2]	PHYTOSULFOKINE 3 PRECURSOR
AT5G47800	BTB/POZ domain-containing protein At5g47800 [MCA23.12]	Phototropic-responsive NPH3 family protein	AT3G46190		TRAF-like family protein
AT5G49630	Amino acid permease 6 (Amino acid transporter AAP6) [AAP6] [MNI5.1]	amino acid permease 6	AT3G49220	Probable pectinesterase/pectinesterase inhibitor 34 [Includes: Pectinesterase inhibitor 34 (Pectin methylesterase inhibitor 34); Pectinesterase 34 (EC 3.1.1.11) (PE 34)(Pectin methylesterase 34) (AtPME34)] [PME34] [ARATH34] [F2K15.80]	Plant invertase/pectin methylesterase inhibitor superfamily
AT5G50090			AT3G49350		Ypt/Rab-GAP domain of gyp1p superfamily protein
AT5G50915	Transcription factor bHLH137 (Basic helix-loop-helix protein 137) (AtbHLH137) (bHLH 137) (Transcription factor EN 89) (bHLH transcription factor bHLH137) [BHLH137] [EN89] [K3K7]	basic helix-loop-helix (bHLH) DNA-binding superfamily protein	AT3G49700	1-aminocyclopropane-1-carboxylate synthase 9 (EC 4.4.1.14) (ACC synthase 9) (Ethylene-overproduction protein 3) (S-adenosyl-L-methionine methylthioadenosine-lyase 9) [ACS9] [ETO3] [T16K5.50]	1-aminocyclopropane-1-carboxylate synthase 9
AT5G51380	F-box protein At5g51380 [MFG13.9]	RNI-like superfamily protein	AT3G49750	Receptor-like protein 44 precursor (AtRLP44) [RLP44] [T16K5.100]	receptor like protein 44
AT5G51810	Gibberellin 20 oxidase 2 (EC 1.14.11.-) (GA 20-oxidase 2) (Gibberellin C-20 oxidase 2) [GA20OX2] [20ox] [At2353] [MIO24.5]	gibberellin 20 oxidase 2	AT3G50280	Uncharacterized acetyltransferase At3g50280 (EC 2.3.1.-) [F11C1.120]	HXXXD-type acyl-transferase family protein
AT5G52890		AT hook motif-containing protein	AT3G50340
AT5G52900	Probable membrane-associated kinase regulator 6 [MAKR6] [MXC20.13]		AT3G50800
AT5G53290	Ethylene-responsive transcription factor CRF3 (Protein CYTOKININ RESPONSE FACTOR 3) [CRF3] [ERF065] [K19E1.9]	cytokinin response factor 3	AT3G52180	Phosphoglucan phosphatase DSP4, chloroplastic precursor (EC 3.1.3.-) (AtPTPKIS1) (Dual specificity protein phosphatase 4) (Protein STARCH-EXCESS 4) (AtSEX4) [DSP4] [PTPKIS1] [SEX4] [F4F15.290]	dual specificity protein phosphatase (DsPTP1) family protein
AT5G54470		B-box type zinc finger family protein	AT3G53450	Cytokinin riboside 5'-monophosphate phosphoribohydrolase LOG4 (EC 3.2.2.n1) (Protein LONELY GUY 4) [LOG4] [F4P12.150]	Putative lysine decarboxylase family protein
AT5G54490	Calcium-binding protein PBP1 (KIC-related protein 2) (PINOID-binding protein 1) [PBP1] [KRP2] [F24B18.11]	pinoid-binding protein 1	AT3G54000
AT5G54500	NAD(P)H dehydrogenase (quinone) FQR1 (EC 1.6.5.2) (Flavodoxin-like quinone reductase 1) [FQR1] [F24B18.12]	flavodoxin-like quinone reductase 1	AT3G54510	CSC1-like protein At3g54510 [T14E10_80]	Early-responsive to dehydration stress protein (ERD4)
AT5G54510	Indole-3-acetic acid-amido synthetase GH3.6 (EC 6.3.2.-) (Auxin-responsive GH3-like protein 6) (AtGH3-6) (Protein DWARF IN LIGHT 1) (DFL-1) [GH3.6] [DFL1] [F24B18.13]	Auxin-responsive GH3 family protein	AT3G54950	Patatin-like protein 7 (EC 3.1.1.-) (AtPLP7) (Patatin-related phospholipase A IIIbeta) (pPLAIIIb) (Phospholipase A IIIA) (AtPLAIIIA) [PLP7] [F28P10.70]	patatin-like protein 6
AT5G56730	Zinc protease PQQL-like (EC 3.4.24.-) [MIK19.18]	Insulinase (Peptidase family M16) protein	AT3G55690
AT5G56970	Cytokinin dehydrogenase 3 precursor (EC 1.5.99.12) (Cytokinin oxidase 3) (AtCKX3) (CKO 3) [CKX3] [MHM17.8]	cytokinin oxidase 3	AT3G55720		Protein of unknown function (DUF620)
AT5G57340			AT3G55740	Proline transporter 2 (AtPROT2) [PROT2] [F1I16.150]	proline transporter 2
AT5G58580	RING-H2 finger protein ATL63 (EC 2.3.2.27) (Protein ARABIDOPSIS TOXICOS EN LEVADURA 63) (Protein ATL63) (RING-type E3 ubiquitin transferase ATL63) [ATL63] [MZN1.3]	TOXICOS EN LEVADURA 63	AT3G56770	Putative transcription factor bHLH107 (Basic helix-loop-helix protein 107) (AtbHLH107) (bHLH 107) (Transcription factor EN 55) (bHLH transcription factor bHLH107) [BHLH107] [EN55] [T8M16.100]	basic helix-loop-helix (bHLH) DNA-binding superfamily protein
AT5G59010	Serine/threonine-protein kinase BSK5 (EC 2.7.11.1) (Brassinosteroid-signaling kinase 5) [BSK5] [K19M22.7]	Protein kinase protein with tetratricopeptide repeat domain	AT3G56790		RNA splicing factor-related
AT5G59360	Cyclin-dependent protein kinase inhibitor SMR14 (Cyclin-dependent protein kinase inhibitor SMR13) (Protein SIAMESE-RELATED 13) (Protein SIAMESE-RELATED 14) [SMR14] [SMR13] [F2O15.2]		AT3G56800	Calmodulin-3 (CaM-3) [CAM3] [T8M16.130]	calmodulin 3
AT5G59510	Small polypeptide DEVIL 18 (Small polypeptide ROTUNDIFOLIA LIKE 5) (Small polypeptide ROT-FOUR-LIKE 5) [DVL18] [RTFL5] [F2O15.21]	ROTUNDIFOLIA like 5	AT3G56810
AT5G60450	Auxin response factor 4 [ARF4] [MUF9.8]	auxin response factor 4	AT3G58120	Basic leucine zipper 61 (AtbZIP61) (bZIP protein 61) [BZIP61] [F9D24.30]	Basic-leucine zipper (bZIP) transcription factor family protein
AT5G62000	Auxin response factor 2 (ARF1-binding protein) (ARF1-BP) (Protein MEGAINTEGUMENTA) [ARF2] [MNT] [MTG10.3]	auxin response factor 2	AT3G58180	Deoxyhypusine hydroxylase (EC 1.14.99.29) (DOHH) (Deoxyhypusine dioxygenase) (Deoxyhypusine monooxygenase) [F9D24.90]	ARM repeat superfamily protein
AT5G64770	Protein GOLVEN 2 precursor (CLAVATA3/ESR (CLE)-related protein CLEL9) (CLE-Like protein 9) (Root meristem growth factor 9) (AtRGF9) [Contains: GLV2p] [GLV2] [CLEL9] [RGF9] [MVP7.10]		AT3G58190	LOB domain-containing protein 29 (ASYMMETRIC LEAVES 2-like protein 16) (AS2-like protein 16) [LBD29] [ASL16] [F9D24.100]	lateral organ boundaries-domain 29
AT5G65670	Auxin-responsive protein IAA9 (Indoleacetic acid-induced protein 9) [IAA9] [F6H11.210] [MPA24.1]	indole-3-acetic acid inducible 9	AT3G59900	Protein AUXIN-REGULATED GENE INVOLVED IN ORGAN SIZE (AtARGOS) [ARGOS] [F24G16.170]	auxin-regulated gene involved in organ size
AT5G66260	SAUR11	SAUR-like auxin-responsive protein family	AT3G60630	Scarecrow-like protein 22 (AtSCL22) (GRAS family protein 21) (AtGRAS-21) (SCL6-III) [SCL22] [T4C21.40]	GRAS family transcription factor
AT5G66580			AT3G60640	Autophagy-related protein 8g precursor (Autophagy-related ubiquitin-like modifier ATG8g) (AtAPG8g) (Protein autophagy 8g) [ATG8G] [APG8G] [T4C21_50]	Ubiquitin-like superfamily protein
AT5G66590		CAP (Cysteine-rich secretory proteins, Antigen 5, and Pathogenesis-related 1 protein) superfamily protein	AT3G60647
AT5G67430		Acyl-CoA N-acyltransferases (NAT) superfamily protein	AT3G60650	Root meristem growth factor 10 precursor (AtRGF10) (CLAVATA3/ESR (CLE)-related protein CLELn) (AtCLELn) (Nuclear CLE-Like protein) [Contains: CLELn] [RGF10] [CLELn] [T4C21.60]
ATCG00020	Photosystem II protein D1 precursor (EC 1.10.3.9) (PSII D1 protein) (Photosystem II Q(B) protein) [psbA]	photosystem II reaction center protein A	AT3G60670		PLATZ transcription factor family protein
ATCG00030			AT3G61460	Brassinosteroid-responsive RING protein 1 [BRH1] [F2A19.60]	brassinosteroid-responsive RING-H2
ATCG00040	Maturase K (Intron maturase) [matK] [ycf14]	maturase K	AT3G62070
ATCG00065	30S ribosomal protein S12, chloroplastic [rps12-A] [rps12A/rps12B] [ATCG00065/ATCG01230]	ribosomal protein S12A	AT3G62100	Auxin-responsive protein IAA30 (Indoleacetic acid-induced protein 30) [IAA30] [T17J13.60]	indole-3-acetic acid inducible 30
ATCG00100			AT3G62110		Pectin lyase-like superfamily protein
ATCG00110			AT3G62860		alpha/beta-Hydrolases superfamily protein
ATCG00120	ATP synthase subunit alpha, chloroplastic (EC 7.1.2.2) (ATP synthase F1 sector subunit alpha) (F-ATPase subunit alpha) [atpA]	ATP synthase subunit alpha	AT3G62960	Glutaredoxin-C14 (AtGrxC14) (Protein ROXY 8) [GRXC14] [ROXY8] [T20O10.60]	Thioredoxin superfamily protein
ATCG00130	ATP synthase subunit b, chloroplastic (ATP synthase F(0) sector subunit b) (ATPase subunit I) [atpF]	ATPase, F0 complex, subunit B/B', bacterial/chloroplast	AT3G63240	Type I inositol polyphosphate 5-phosphatase 4 (EC 3.1.3.-) (At5PTase4) [IP5P4] [F16M2_90]	DNAse I-like superfamily protein
ATCG00140	ATP synthase subunit c, chloroplastic (ATP synthase F(0) sector subunit c) (ATPase subunit III) (F-type ATPase subunit c) (F-ATPase subunit c) (Lipid-binding protein) [atpH]	ATP synthase subunit C family protein	AT3G63430
ATCG00150	ATP synthase subunit a, chloroplastic (ATP synthase F0 sector subunit a) (F-ATPase subunit IV) [atpI]	ATPase, F0 complex, subunit A protein	AT3G63440	Cytokinin dehydrogenase 6 precursor (EC 1.5.99.12) (Cytokinin oxidase 6) (AtCKX6) (AtCKX7) (CKO6) [CKX6] [CKX7] [MAA21_70]	cytokinin oxidase/dehydrogenase 6
ATCG00160	30S ribosomal protein S2, chloroplastic [rps2]	ribosomal protein S2	AT3G63445		other RNA
ATCG00170	DNA-directed RNA polymerase subunit beta'' (EC 2.7.7.6) (PEP) (Plastid-encoded RNA polymerase subunit beta'') (RNA polymerase subunit beta'') [rpoC2]	DNA-directed RNA polymerase family protein	AT3G63510		FMN-linked oxidoreductases superfamily protein
ATCG00180	DNA-directed RNA polymerase subunit beta' (EC 2.7.7.6) (PEP) (Plastid-encoded RNA polymerase subunit beta') (RNA polymerase subunit beta') [rpoC1]	DNA-directed RNA polymerase family protein	AT4G00050	Transcription factor UNE10 (Basic helix-loop-helix protein 16) (AtbHLH16) (bHLH 16) (Protein UNFERTILIZED EMBRYO SAC 10) (Transcription factor EN 108) (bHLH transcription factor bHLH016) [UNE10] [BHLH16] [EN108] [F6N15.11]	basic helix-loop-helix (bHLH) DNA-binding superfamily protein
ATCG00190	DNA-directed RNA polymerase subunit beta (EC 2.7.7.6) (PEP) (Plastid-encoded RNA polymerase subunit beta) (RNA polymerase subunit beta) [rpoB]	RNA polymerase subunit beta	AT4G00080		Plant invertase/pectin methylesterase inhibitor superfamily protein
ATCG00270	Photosystem II D2 protein (EC 1.10.3.9) (PSII D2 protein) (Photosystem Q(A) protein) [psbD]	photosystem II reaction center protein D	AT4G00480	Transcription factor MYC1 (AtMYC1) (Basic helix-loop-helix protein 12) (AtbHLH12) (bHLH 12) (Transcription factor EN 58) (bHLH transcription factor bHLH012) [BHLH12] [EN58] [MYC1] [F6N23.22]	basic helix-loop-helix (bHLH) DNA-binding superfamily protein
ATCG00280	Photosystem II CP43 reaction center protein precursor (PSII 43 kDa protein) (Protein CP-43) [psbC] [CP43]	photosystem II reaction center protein C	AT4G00940	Dof zinc finger protein DOF4.1 (AtDOF4.1) [DOF4.1] [A_TM018A10.2] [T18A10.24]	Dof-type zinc finger DNA-binding family protein
ATCG00330	30S ribosomal protein S14, chloroplastic [rps14]	chloroplast ribosomal protein S14	AT4G01110
ATCG00340	Photosystem I P700 chlorophyll a apoprotein A2 (EC 1.97.1.12) (PSI-B) (PsaB) [psaB]	Photosystem I, PsaA/PsaB protein	AT4G01975		transposable element gene
ATCG00350	Photosystem I P700 chlorophyll a apoprotein A1 (EC 1.97.1.12) (PSI-A) (PsaA) [psaA]	Photosystem I, PsaA/PsaB protein	AT4G02160
ATCG00360	Photosystem I assembly protein Ycf3 [ycf3]	Tetratricopeptide repeat (TPR)-like superfamily protein	AT4G04710	Calcium-dependent protein kinase 22 (EC 2.7.11.1) [CPK22] [T4B21.12]	calcium-dependent protein kinase 22
ATCG00380	30S ribosomal protein S4, chloroplastic [rps4]	chloroplast ribosomal protein S4	AT4G05018
ATCG00400			AT4G08040	1-aminocyclopropane-1-carboxylate synthase 11 (EC 4.4.1.14) (ACC synthase 11) (S-adenosyl-L-methionine methylthioadenosine-lyase 11) [ACS11] [T17A2.2]	1-aminocyclopropane-1-carboxylate synthase 11
ATCG00430	NAD(P)H-quinone oxidoreductase subunit K, chloroplastic (EC 7.1.1.-) (NAD(P)H dehydrogenase subunit K) (NADH-plastoquinone oxidoreductase subunit K) [ndhK] [psbG]	photosystem II reaction center protein G	AT4G09510	Alkaline/neutral invertase CINV2 (EC 3.2.1.26) (Alkaline/neutral invertase I) (A/N-INVI) (Cytosolic invertase 2) [CINV2] [INVI] [T15G18.70]	cytosolic invertase 2
ATCG00440	NAD(P)H-quinone oxidoreductase subunit 3, chloroplastic (EC 7.1.1.-) (NAD(P)H dehydrogenase subunit 3) (NADH-plastoquinone oxidoreductase subunit 3) [ndhC]	NADH:ubiquinone/plastoquinone oxidoreductase, chain 3 protein	AT4G09890		Protein of unknown function (DUF3511)
ATCG00450			AT4G09970
ATCG00470	ATP synthase epsilon chain, chloroplastic (ATP synthase F1 sector epsilon subunit) (F-ATPase epsilon subunit) [atpE]	ATP synthase epsilon chain	AT4G10150	RING-H2 finger protein ATL7 (EC 2.3.2.27) (RING-type E3 ubiquitin transferase ATL7) [ATL7] [F28M11.70] [T9A4.19]	RING/U-box superfamily protein
ATCG00480	ATP synthase subunit beta, chloroplastic (EC 7.1.2.2) (ATP synthase F1 sector subunit beta) (F-ATPase subunit beta) [atpB]	ATP synthase subunit beta	AT4G10160	E3 ubiquitin-protein ligase ATL59 (EC 2.3.2.27) (RING-H2 finger protein ATL59) (RING-type E3 ubiquitin transferase ATL59) [ATL59] [F28M11.80] [T9A4.20]	RING/U-box superfamily protein
ATCG00490	Ribulose bisphosphate carboxylase large chain precursor (EC 4.1.1.39) (RuBisCO large subunit) [rbcL]	ribulose-bisphosphate carboxylases	AT4G10370		Cysteine/Histidine-rich C1 domain family protein
ATCG00500	Acetyl-coenzyme A carboxylase carboxyl transferase subunit beta, chloroplastic (EC 2.1.3.15) (ACCase subunit beta) (Acetyl-CoA carboxylase carboxyltransferase subunit beta) [accD]	acetyl-CoA carboxylase carboxyl transferase subunit beta	AT4G11950		Protein of unknown function (DUF1191)
ATCG00510	Photosystem I reaction center subunit VIII (PSI-I) [psaI]	photsystem I subunit I	AT4G12110	Methylsterol monooxygenase 1-1 (EC 1.14.18.9) (Sterol 4-alpha-methyl-oxidase 1-1) (AtSMO1-1) [SMO1-1] [F16J13.180]	sterol-4alpha-methyl oxidase 1-1
ATCG00520	Photosystem I assembly protein Ycf4 [ycf4]	unfolded protein binding	AT4G13130		Cysteine/Histidine-rich C1 domain family protein
ATCG00530	Chloroplast envelope membrane protein [cemA] [ycf10]	CemA-like proton extrusion protein-related	AT4G13180		NAD(P)-binding Rossmann-fold superfamily protein
ATCG00540	Cytochrome f precursor [petA]	photosynthetic electron transfer A	AT4G13190	Probable serine/threonine-protein kinase PBL24 (EC 2.7.11.1) (PBS1-like protein 24) [PBL24] [F17N18.80]	Protein kinase superfamily protein
ATCG00630	Photosystem I reaction center subunit IX (PSI-J) [psaJ]	PSAJ	AT4G13195	CLAVATA3/ESR (CLE)-related protein 44 precursor (Tracheary element differentiation inhibitory factor-like protein) (TDIF-like protein) [Contains: CLE44p] [CLE44] [F17N18]	CLAVATA3/ESR-RELATED 44
ATCG00640	50S ribosomal protein L33, chloroplastic [rpl33]	ribosomal protein L33	AT4G13235	Defensin-like protein 37 precursor (Protein EMBRYO SAC DEVELOPMENT ARREST 21) [EDA21] [F17N18.120]	embryo sac development arrest 21
ATCG00650	30S ribosomal protein S18, chloroplastic [rps18]	ribosomal protein S18	AT4G13790	SAUR25	SAUR-like auxin-responsive protein family
ATCG00660	50S ribosomal protein L20, chloroplastic [rpl20]	ribosomal protein L20	AT4G14550	Auxin-responsive protein IAA14 (Indoleacetic acid-induced protein 14) (Protein SOLITARY ROOT) [IAA14] [SLR1] [dl3315c] [FCAALL.254]	indole-3-acetic acid inducible 14
ATCG00670	Chloroplastic ATP-dependent Clp protease proteolytic subunit 1 (EC 3.4.21.92) (Endopeptidase ClpP1) (pClpP) [clpP1] [ClpP]	plastid-encoded CLP P	AT4G14560	Auxin-responsive protein IAA1 (Indoleacetic acid-induced protein 1) [IAA1] [dl3320w] [FCAALL.409]	indole-3-acetic acid inducible
ATCG00680	Photosystem II CP47 reaction center protein (PSII 47 kDa protein) (Protein CP-47) [psbB]	photosystem II reaction center protein B	AT4G14819		Protein of unknown function (DUF1677)
ATCG00690	Photosystem II reaction center protein T (PSII-T) [psbT] [ycf8]	photosystem II reaction center protein T	AT4G15120		VQ motif-containing protein
ATCG00720	Cytochrome b6 [petB]	photosynthetic electron transfer B	AT4G15320	Cellulose synthase-like protein B6 (EC 2.4.1.-) (AtCslB6) [CSLB6] [dl3705c] [FCAALL.268]	cellulose synthase-like B6
ATCG00730	Cytochrome b6-f complex subunit 4 (17 kDa polypeptide) [petD]	photosynthetic electron transfer D	AT4G15760	Monooxygenase 1 (EC 1.14.13.-) (AtMO1) [MO1] [dl3920c] [FCAALL.376]	monooxygenase 1
ATCG00740	DNA-directed RNA polymerase subunit alpha (EC 2.7.7.6) (PEP) (Plastid-encoded RNA polymerase subunit alpha) (RNA polymerase subunit alpha) [rpoA]	RNA polymerase subunit alpha	AT4G15765		FAD/NAD(P)-binding oxidoreductase family protein
ATCG00750	30S ribosomal protein S11, chloroplastic [rps11]	ribosomal protein S11	AT4G16515	Protein GOLVEN 1 precursor (CLAVATA3/ESR (CLE)-related protein CLEL6) (CLE-Like protein 6) (Root meristem growth factor 6) (AtRGF6) [Contains: GLV1p] [GLV1] [CLEL6] [RGF6] [FCAALL]
ATCG00760	50S ribosomal protein L36, chloroplastic [rpl36]	ribosomal protein L36	AT4G17350		Plant protein of unknown function (DUF828) with plant pleckstrin homology-like region
ATCG00770	30S ribosomal protein S8, chloroplastic [rps8]	ribosomal protein S8	AT4G17460	Homeobox-leucine zipper protein HAT1 (Homeodomain-leucine zipper protein HAT1) (HD-ZIP protein 1) [HAT1] [dl4765w] [FCAALL.65]	Homeobox-leucine zipper protein 4 (HB-4) / HD-ZIP protein
ATCG00780	50S ribosomal protein L14, chloroplastic [rpl14]	ribosomal protein L14	AT4G17480		alpha/beta-Hydrolases superfamily protein
ATCG00790	50S ribosomal protein L16, chloroplastic [rpl16]	ribosomal protein L16	AT4G17615	Calcineurin B-like protein 1 (SOS3-like calcium-binding protein 5) [CBL1] [SCABP5] [dl4845w] [FCAALL.122]	calcineurin B-like protein 1
ATCG00800	30S ribosomal protein S3, chloroplastic [rps3]	structural constituent of ribosome	AT4G17695	Probable transcription factor KAN3 (Protein KANADI 3) [KAN3] [FCAALL]	Homeodomain-like superfamily protein
ATCG00810	50S ribosomal protein L22, chloroplastic [rpl22]	ribosomal protein L22	AT4G17770	Alpha,alpha-trehalose-phosphate synthase [UDP-forming] 5 (EC 2.4.1.15) (Trehalose-6-phosphate synthase 5) (AtTPS5) [TPS5] [dl4920W] [FCAALL.9]	trehalose phosphatase/synthase 5
ATCG01010	NAD(P)H-quinone oxidoreductase subunit 5, chloroplastic (EC 7.1.1.-) (NAD(P)H dehydrogenase subunit 5) (NADH-plastoquinone oxidoreductase subunit 5) [ndhF]	NADH-Ubiquinone oxidoreductase (complex I), chain 5 protein	AT4G19380	Long-chain-alcohol oxidase FAO4A (EC 1.1.3.20) (Long-chain fatty alcohol oxidase 4A) [FAO4A] [T5K18.160]	Long-chain fatty alcohol dehydrogenase family protein
ATCG01040	Cytochrome c biogenesis protein CcsA [ccsA]	Cytochrome C assembly protein	AT4G20230	Terpenoid synthase 9 (EC 4.2.3.-) (AtTPS09) [TPS09] [F1C12.150]	Terpenoid cyclases/Protein prenyltransferases superfamily protein
ATCG01050	NAD(P)H-quinone oxidoreductase chain 4, chloroplastic (EC 7.1.1.-) (NAD(P)H dehydrogenase, chain 4) (NADH-plastoquinone oxidoreductase chain 4) [ndhD]	NADH-Ubiquinone/plastoquinone (complex I) protein	AT4G21200	Gibberellin 2-beta-dioxygenase 8 (EC 1.14.11.13) (GA 2-oxidase 8) (Gibberellin 2-beta-hydroxylase 8) (Gibberellin 2-oxidase 8) [GA2OX8] [F7J7.140]	gibberellin 2-oxidase 8
ATCG01060	Photosystem I iron-sulfur center (EC 1.97.1.12) (9 kDa polypeptide) (PSI-C) (Photosystem I subunit VII) (PsaC) [psaC] [frxA]	iron-sulfur cluster binding;electron carriers;4 iron, 4 sulfur cluster binding	AT4G21730
ATCG01070	NAD(P)H-quinone oxidoreductase subunit 4L, chloroplastic (EC 7.1.1.-) (NAD(P)H dehydrogenase subunit 4L) (NADH-plastoquinone oxidoreductase subunit 4L) [ndhE]	NADH-ubiquinone/plastoquinone oxidoreductase chain 4L	AT4G21740
ATCG01080	NAD(P)H-quinone oxidoreductase subunit 6, chloroplastic (EC 7.1.1.-) (NAD(P)H dehydrogenase subunit 6) (NADH-plastoquinone oxidoreductase subunit 6) [ndhG]	NADH:ubiquinone/plastoquinone oxidoreductase, chain 6	AT4G21745	CRIB domain-containing protein RIC11 (ROP-interactive CRIB motif-containing protein 11) (Target of ROP protein RIC11) [RIC11] [F17L22]	PAK-box/P21-Rho-binding family protein
ATCG01090	NAD(P)H-quinone oxidoreductase subunit I, chloroplastic (EC 7.1.1.-) (NAD(P)H dehydrogenase subunit I) (NDH subunit I) (NADH-plastoquinone oxidoreductase subunit I) [ndhI]	NADPH dehydrogenases	AT4G22530		S-adenosyl-L-methionine-dependent methyltransferases superfamily protein
ATCG01100	NAD(P)H-quinone oxidoreductase subunit 1, chloroplastic (EC 7.1.1.-) (NAD(P)H dehydrogenase subunit 1) (NDH subunit 1) (NADH-plastoquinone oxidoreductase subunit 1) [ndhA]	NADH dehydrogenase family protein	AT4G22545
ATCG01110	NAD(P)H-quinone oxidoreductase subunit H, chloroplastic (EC 7.1.1.-) (NAD(P)H dehydrogenase subunit H) (NADH-plastoquinone oxidoreductase 49 kDa subunit) (NADH-plastoquinone oxidoreductase subunit H) [ndhH]	NAD(P)H dehydrogenase subunit H	AT4G22560
ATCG01120	30S ribosomal protein S15, chloroplastic [rps15]	chloroplast ribosomal protein S15	AT4G22780	ACT domain-containing protein ACR7 (Protein ACT DOMAIN REPEATS 7) [ACR7] [T12H17.170]	ACT domain repeat 7
ATCG01130	Protein TIC 214 (Translocon at the inner envelope membrane of chloroplasts 214) (AtTIC214) [TIC214] [ycf1-B]	Ycf1 protein	AT4G22790	Protein DETOXIFICATION 56 (AtDTX56) (Multidrug and toxic compound extrusion protein 56) (MATE protein 56) (Protein RESISTANT TO HIGH CARBON DIOXIDE 1) [DTX56] [RHC1] [T12H17.180]	MATE efflux family protein
ATMG00070	NADH dehydrogenase [ubiquinone] iron-sulfur protein 3 (EC 7.1.1.2) (NADH dehydrogenase subunit 9) [NAD9]	NADH dehydrogenase subunit 9	AT4G23340		2-oxoglutarate (2OG) and Fe(II)-dependent oxygenase superfamily protein
ATMG00080	60S ribosomal protein L16, mitochondrial [RPL16]	ribosomal protein L16	AT4G24275
ATMG00090	Ribosomal protein S3, mitochondrial [RPS3]	structural constituent of ribosome;protein binding	AT4G25280	Probable UMP-CMP kinase 2 (EC 2.7.4.14) (Deoxycytidylate kinase) (CK) (dCMP kinase) (Uridine monophosphate/cytidine monophosphate kinase) (UMP/CMP kinase) (UMP/CMPK) [UMK2] [F24A6.120]	P-loop containing nucleoside triphosphate hydrolases superfamily protein
			AT4G25410	Transcription factor bHLH126 (Basic helix-loop-helix protein 126) (AtbHLH126) (bHLH 126) (Transcription factor EN 3) (bHLH transcription factor bHLH126) [BHLH126] [EN3][T30C3.80]	basic helix-loop-helix (bHLH) DNA-binding superfamily protein
			AT4G25420	Gibberellin 20 oxidase 1 (EC 1.14.11.-) (GA 20-oxidase 1) (AtGA20ox1) (Gibberellin C-20 oxidase 1) [GA20OX1] [20ox1] [At2301] [GA5] [T30C3.90]	2-oxoglutarate (2OG) and Fe(II)-dependent oxygenase superfamily protein
			AT4G26540	LRR receptor-like serine/threonine-protein kinase RGI3 precursor (EC 2.7.11.1) (Protein RECEPTOR OF RGF1 1) (Protein RGF1 INSENSITIVE 3) [RGI3] [RGFR1] [RGFR3] [M3E9.30]	Leucine-rich repeat receptor-like protein kinase family protein
			AT4G27240		zinc finger (C2H2 type) family protein
			AT4G27260	Indole-3-acetic acid-amido synthetase GH3.5 (EC 6.3.2.-) (Auxin-responsive GH3-like protein 5) (AtGH3-5) [GH3.5] [M4I22.70]	Auxin-responsive GH3 family protein
			AT4G27270	Probable NAD(P)H dehydrogenase (quinone) FQR1-like 1 (EC 1.6.5.2)	Quinone reductase family protein
			AT4G27280	Calcium-binding protein KRP1 (KIC-related protein 1) [KRP1] [M4I22.90]	Calcium-binding EF-hand family protein
			AT4G27290	G-type lectin S-receptor-like serine/threonine-protein kinase At4g27290 precursor (EC 2.7.11.1) [M4I22.100]	S-locus lectin protein kinase family protein
			AT4G27300	G-type lectin S-receptor-like serine/threonine-protein kinase SD1-1 precursor (EC 2.7.11.1) (S-domain-1 (SD1) receptor kinase 1) (SD1-1) [SD11] [M4I22.110]	S-locus lectin protein kinase family protein
			AT4G28490	Receptor-like protein kinase 5 precursor (EC 2.7.10.1) (EC 2.7.11.1) (Protein HAESA) [RLK5] [HAE] [F21O9.180]	Leucine-rich receptor-like protein kinase family protein
			AT4G28640	Auxin-responsive protein IAA11 (Indoleacetic acid-induced protein 11) [IAA11] [T5F17.90]	indole-3-acetic acid inducible 11
			AT4G28650	MDIS1-interacting receptor like kinase 1 precursor (AtMIK1) (Leucine-rich repeat receptor-like protein kinase PXL2) (EC 2.7.11.1) (Protein PHLOEM INTERCALATED WITH XYLEM-LIKE 2) [MIK1] [PXL2] [T5F17.100]	Leucine-rich repeat transmembrane protein kinase family protein
			AT4G28790	Transcription factor bHLH23 (Basic helix-loop-helix protein 23) (AtbHLH23) (bHLH 23) (Transcription factor EN 107) (bHLH transcription factor bHLH023) [BHLH23] [EN107] [F16A16.100]	basic helix-loop-helix (bHLH) DNA-binding superfamily protein
			AT4G30710	AUGMIN subunit 8 (QWRF motif-containing protein 8) (ROP1 enhancer 2) [AUG8] [QWRF8] [REN2] [T10C21.60]	Family of unknown function (DUF566)
			AT4G31620	B3 domain-containing protein REM3 (Protein REPRODUCTIVE MERISTEM 3) [REM3] [F28M20.190]	Transcriptional factor B3 family protein
			AT4G31630	Putative B3 domain-containing protein REM4 (Protein REPRODUCTIVE MERISTEM 4) [REM4] [F28M20.180]	Transcriptional factor B3 family protein
			AT4G31910	Brassinosteroid-related acyltransferase 1 (EC 2.3.1.-) (BR-related acyltransferase 1) (Protein DWARF AND ROUND LEAF 1) (Protein PIZZA) [BAT1] [DRL1] [PIZ] [F10N7.280] [F11C18.110]	HXXXD-type acyl-transferase family protein
			AT4G32280	Auxin-responsive protein IAA29 (Indoleacetic acid-induced protein 29) [IAA29] [F10M6.80]	indole-3-acetic acid inducible 29
			AT4G32780		phosphoinositide binding
			AT4G32785
			AT4G32810	Carotenoid cleavage dioxygenase 8, chloroplastic precursor (EC 1.13.11.69) (EC 1.13.11.70) (AtCCD8) (AtNCED8) (Protein MORE AXILLARY BRANCHING 4) (Protein MORE AXILLARYGROWTH 4) [CCD8] [MAX4] [NCED8] [T16I18.20]	carotenoid cleavage dioxygenase 8
			AT4G32880	Homeobox-leucine zipper protein ATHB-8 (HD-ZIP protein ATHB-8) (Homeodomain transcription factor ATHB-8) [ATHB-8] [HB8] [T16I18.90]	homeobox gene 8
			AT4G33970	Pollen-specific leucine-rich repeat extensin-like protein 4 precursor (AtPEX4) (Pollen-specific LRR/EXTENSIN4) (Cell wall hydroxyproline-rich glycoprotein) [PEX4] [F17I5.160]	Leucine-rich repeat (LRR) family protein
			AT4G34131	UDP-glycosyltransferase 73B3 (EC 2.4.1.-) (Flavonol 3-O-glucosyltransferase UGT73B3) (EC 2.4.1.91) [UGT73B3] [F28A23.120]	UDP-glucosyl transferase 73B3
			AT4G34135	UDP-glucosyl transferase 73B2 (EC 2.4.1.-) (Flavonol 7-O-glucosyltransferase) (EC 2.4.1.237) (UDP glucose:flavonoid 7-O-glucosyltransferase) [UGT73B2] [F28A23]	UDP-glucosyltransferase 73B2
			AT4G34760	SAUR50	SAUR-like auxin-responsive protein family
			AT4G34770	SAUR1	SAUR-like auxin-responsive protein family
			AT4G34800	SAUR4	SAUR-like auxin-responsive protein family
			AT4G35200		Arabidopsis protein of unknown function (DUF241)
			AT4G35210		Arabidopsis protein of unknown function (DUF241)
			AT4G35660		Arabidopsis protein of unknown function (DUF241)
			AT4G36060	Transcription factor bHLH11 (Basic helix-loop-helix protein 11) (AtbHLH11) (bHLH 11) (Transcription factor EN 137) (bHLH transcription factor bHLH011) [BHLH11] [EN137] [T19K4.190]	basic helix-loop-helix (bHLH) DNA-binding superfamily protein
			AT4G36110	SAUR9	SAUR-like auxin-responsive protein family
			AT4G36540	Transcription factor BEE 2 (Basic helix-loop-helix protein 58) (AtbHLH58) (bHLH 58) (Protein Brassinosteroid enhanced expression 2) (Transcription factor EN 80) (bHLH transcription factor bHLH058) [BEE2] [BHLH58] [EN80] [AP22.3]	BR enhanced expression 2
			AT4G37290	PAMP-induced secreted peptide 2 precursor [PIP2] [C7A10.70]
			AT4G37295
			AT4G37310		cytochrome P450, family 81, subfamily H, polypeptide 1
			AT4G37370		cytochrome P450, family 81, subfamily D, polypeptide 8
			AT4G37380	Pentatricopeptide repeat-containing protein ELI1, chloroplastic precursor (Protein EDITING LACKING INSERTIONAL MUTANT 1) [ELI1] [PCMP-H48] [F6G17.30]	Tetratricopeptide repeat (TPR)-like superfamily protein
			AT4G37390	Indole-3-acetic acid-amido synthetase GH3.2 (EC 6.3.2.-) (Auxin-responsive GH3-like protein 2) (AtGH3-2) (Protein YADOKARI 1) [GH3.2] [BRU6] [CF4] [YDK1] [F6G17.40]	Auxin-responsive GH3 family protein
			AT4G37590	BTB/POZ domain-containing protein NPY5 (Protein NAKED PINS IN YUC MUTANTS 5) [NPY5] [F19F18.80]	Phototropic-responsive NPH3 family protein
			AT4G37770	1-aminocyclopropane-1-carboxylate synthase 8 (EC 4.4.1.14) (ACC synthase 8) (S-adenosyl-L-methionine methylthioadenosine-lyase 8) [ACS8] [T28I19.50]	1-amino-cyclopropane-1-carboxylate synthase 8
			AT4G37890	Probable E3 ubiquitin-protein ligase EDA40 (EC 2.3.2.27) (Protein EMBRYO SAC DEVELOPMENT ARREST 40) (RING-type E3 ubiquitin transferase EDA40) [EDA40] [F20D10.10]	Zinc finger (C3HC4-type RING finger) family protein
			AT4G37900	Glycine-rich domain-containing protein 2 (AtGRDP2) [GRDP2] [F20D10.20]	Protein of unknown function (duplicated DUF1399)
			AT4G38400	Expansin-like A2 precursor (At-EXPL2) (AtEXLA2) (AtEXPL2) (Ath-ExpBeta-2.2) [EXLA2] [EXPL2] [F22I13.170]	expansin-like A2
			AT4G38830	Cysteine-rich receptor-like protein kinase 26 precursor (EC 2.7.11.-) (Cysteine-rich RLK26) [CRK26] [T9A14.110]	cysteine-rich RLK (RECEPTOR-like protein kinase) 26
			AT4G38840	SAUR14	SAUR-like auxin-responsive protein family
			AT4G38850	SAUR15	SAUR-like auxin-responsive protein family
			AT4G38900	bZIP transcription factor 29 (AtbZIP29) (Protein DRINK ME-LIKE) [BZIP29] [DKML] [F19H22.5]	Basic-leucine zipper (bZIP) transcription factor family protein
			AT4G39390	UDP-rhamnose/UDP-galactose transporter 4 (UDP-Rha/UDP-Gal transporter 4) (Bi-functional UDP-rhamnose/UDP-galactose transporter) (Nucleotide sugar transporter-KT 1) (AtNST-KT1) [URGT4] [NST-KT1] [F23K16.20]	nucleotide sugar transporter-KT 1
			AT4G39403	Peptide POLARIS (Protein expressed in embryo 101) (AtEM101) [PLS] [EM101] [F23K16]	polaris
			AT5G01890	Leucine-rich repeat receptor-like protein kinase PXC2 precursor (Protein PXY/TDR-CORRELATED 2) [PXC2]	Leucine-rich receptor-like protein kinase family protein
			AT5G02760	Probable protein phosphatase 2C 67 (EC 3.1.3.16) (AtPP2C67) [F9G14.70]	Protein phosphatase 2C family protein
			AT5G03550
			AT5G03640		Protein kinase superfamily protein
			AT5G03890
			AT5G04770	Cationic amino acid transporter 6, chloroplastic precursor [CAT6] [T1E3.130]	cationic amino acid transporter 6
			AT5G04980	Type I inositol polyphosphate 5-phosphatase 10 (EC 3.1.3.-) (At5PTase10) [IP5P10] [MUG13.16]	DNAse I-like superfamily protein
			AT5G05090		Homeodomain-like superfamily protein
			AT5G05180
			AT5G05810	RING-H2 finger protein ATL43 precursor (EC 2.3.2.27) (RING-type E3 ubiquitin transferase ATL43) [ATL43] [MJJ3.23]	RING/U-box superfamily protein
			AT5G05840		Protein of unknown function (DUF620)
			AT5G06080	LOB domain-containing protein 33 (ASYMMETRIC LEAVES 2-like protein 24) (AS2-like protein 24) [LBD33] [ASL24] [K16F4.4]	LOB domain-containing protein 33
			AT5G06400	Putative pentatricopeptide repeat-containing protein At5g06400, mitochondrial precursor [MHF15.8]	Pentatricopeptide repeat (PPR) superfamily protein
			AT5G06430		Thioredoxin superfamily protein
			AT5G06930
			AT5G08790	Protein ATAF2 (NAC domain-containing protein 81) (ANAC081) [NAC081] [ATAF2] [T2K12.140]	NAC (No Apical Meristem) domain transcriptional regulator superfamily protein
			AT5G09430		alpha/beta-Hydrolases superfamily protein
			AT5G09800	U-box domain-containing protein 28 (EC 2.3.2.27) (Plant U-box protein 28) (RING-type E3 ubiquitin transferase PUB28) [PUB28] [F17I14_10] [MTH16.27]	ARM repeat superfamily protein
			AT5G09805	Protein IDA-LIKE 3 precursor [IDL3] [F17I14] [MYH9]	inflorescence deficient in abscission (IDA)-like 3
			AT5G10150	Protein SOSEKI 2 (AtSOK2) (Protein UPSTREAM OF FLC) [SOK2] [UFC] [T31P16.140]	Domain of unknown function (DUF966)
			AT5G11950	Cytokinin riboside 5'-monophosphate phosphoribohydrolase LOG8 (EC 3.2.2.n1) (LOG family protein At5g11950) (Protein LONELY GUY 8) [LOG8] [F14F18.120]	Putative lysine decarboxylase family protein
			AT5G12050	Protein BIG GRAIN 1-like D [F14F18.220]
			AT5G12330	Protein LATERAL ROOT PRIMORDIUM 1 [LRP1] [T2L20]	Lateral root primordium (LRP) protein-related
			AT5G14230
			AT5G14400		cytochrome P450, family 724, subfamily A, polypeptide 1
			AT5G15160	Transcription factor PRE2 (Basic helix-loop-helix protein 134) (AtbHLH134) (bHLH 134) (Protein BANQUO 2) (Protein PACLOBUTRAZOL RESISTANCE 2) (Transcription factor EN 52) (bHLH transcription factor bHLH134) [PRE2] [BHLH134] [BNQ2] [EN52] [F8M21.50]	BANQUO 2
			AT5G15580	Protein LONGIFOLIA 1 (Protein TON1 RECRUITING MOTIF 2) [LNG1] [TRM2] [T20K14.190]	longifolia1
			AT5G16200		50S ribosomal protein-related
			AT5G17490	DELLA protein RGL3 (GRAS family protein 27) (AtGRAS-27) (RGA-like protein 3) [RGL3] [K3M16.60]	RGA-like protein 3
			AT5G17760	AAA-ATPase At5g17760 (EC 3.6.1.-) [MVA3.12]	P-loop containing nucleoside triphosphate hydrolases superfamily protein
			AT5G18010	SAUR19	SAUR-like auxin-responsive protein family
			AT5G18020	SAUR20	SAUR-like auxin-responsive protein family
			AT5G18030	SAUR21	SAUR-like auxin-responsive protein family
			AT5G18050	SAUR22	SAUR-like auxin-responsive protein family
			AT5G18060	SAUR23	SAUR-like auxin-responsive protein family
			AT5G18070	Phosphoacetylglucosamine mutase (EC 5.4.2.3) (PAGM) (Acetylglucosamine phosphomutase) (DNA-damage-repair/toleration protein DRT101) (N-acetylglucosamine-phosphate mutase) [DRT101] [MRG7.2]	phosphoglucosamine mutase-related
			AT5G18080	SAUR24	SAUR-like auxin-responsive protein family
			AT5G18560	Ethylene-responsive transcription factor ERF086 [ERF086] [PUCHI] [T28N17.40]	Integrase-type DNA-binding superfamily protein
			AT5G18930	S-adenosylmethionine decarboxylase proenzyme 4 precursor (EC 4.1.1.50) (AdoMetDC4) [Contains: S-adenosylmethionine decarboxylase 1 alpha chain; S-adenosylmethionine decarboxylase 1 beta chain (Protein BUSHY AND DWARF 2)] [SAMDC4] [BUD2]	Adenosylmethionine decarboxylase family protein
			AT5G19530	Thermospermine synthase ACAULIS5 (EC 2.5.1.79) [ACL5] [TKV] [T20D1.50]	S-adenosyl-L-methionine-dependent methyltransferases superfamily protein
			AT5G20110		Dynein light chain type 1 family protein
			AT5G20540	Protein Brevis radix-like 4 (AtBRXL4) [BRXL4] [F7C8.130]	BREVIS RADIX-like 4
			AT5G20560		Glycosyl hydrolase superfamily protein
			AT5G21120	ETHYLENE INSENSITIVE 3-like 2 protein [EIL2] [T10F18.150]	ETHYLENE-INSENSITIVE3-like 2
			AT5G22050		Protein kinase superfamily protein
			AT5G22560		Plant protein of unknown function (DUF247)
			AT5G22570	Probable WRKY transcription factor 38 (WRKY DNA-binding protein 38) [WRKY38] [MQJ16.11]	WRKY DNA-binding protein 38
			AT5G22860		Serine carboxypeptidase S28 family protein
			AT5G22930		Protein of unknown function (DUF1635)
			AT5G23850		Arabidopsis thaliana protein of unknown function (DUF821)
			AT5G24320		Transducin/WD40 repeat-like superfamily protein
			AT5G24870		RING/U-box superfamily protein
			AT5G24920	Protein GLUTAMINE DUMPER 5 [GDU5] [F6A4.130]	glutamine dumper 5
			AT5G26930	GATA transcription factor 23 [GATA23] [F2P16.190] [F2P16.9]	GATA transcription factor 23
			AT5G27000	Kinesin-like protein KIN-14G (Kinesin-like protein KatD) [KIN14G] [ATK4] [KATD] [F2P16.12]	kinesin 4
			AT5G36960
			AT5G37890	E3 ubiquitin-protein ligase SINA-like 7 (EC 2.3.2.27) (RING-type E3 ubiquitin transferase SINA-like 7) (Seven in absentia-like protein 7) [K18L3.9]	Protein with RING/U-box and TRAF-like domains
			AT5G37940		Zinc-binding dehydrogenase family protein
			AT5G37950		UDP-Glycosyltransferase superfamily protein
			AT5G37960		GroES-like family protein
			AT5G38200		Class I glutamine amidotransferase-like superfamily protein
			AT5G39850	40S ribosomal protein S9-2 [RPS9C] [MYH19.1] [MYH19.10]	Ribosomal protein S4
			AT5G39860	Transcription factor PRE1 (Basic helix-loop-helix protein 136) (AtbHLH136) (bHLH 136) (Protein BANQUO 1) (Protein PACLOBUTRAZOL RESISTANCE 1) (bHLH transcription factorbHLH136) [PRE1] [BHLH136] [BNQ1] [MYH19.1]	basic helix-loop-helix (bHLH) DNA-binding family protein
			AT5G40630		Ubiquitin-like superfamily protein
			AT5G40910		Disease resistance protein (TIR-NBS-LRR class) family
			AT5G41400		RING/U-box superfamily protein
			AT5G41663		MIR319/MIR319B; miRNA
			AT5G42030	Protein ABIL4 (Abl interactor-like protein 4) (AtABIL4) [ABIL4] [MJC20.13]	ABL interactor-like protein 4
			AT5G42040	Putative 26S proteasome non-ATPase regulatory subunit 8 homolog B (26S proteasome regulatory subunit RPN12b) (AtRPN12b) (26S proteasome regulatory subunit S14 homolog B)[RPN12B] [MJC20.14]	regulatory particle non-ATPase 12B
			AT5G42410	SAUR43	SAUR-like auxin-responsive protein family
			AT5G42750	BRI1 kinase inhibitor 1 [BKI1] [MJB21.13]	BRI1 kinase inhibitor 1
			AT5G43180		Protein of unknown function, DUF599
			AT5G43450	1-aminocyclopropane-1-carboxylate oxidase homolog 10 (EC 1.14.-.-) [MWF20.16]	2-oxoglutarate (2OG) and Fe(II)-dependent oxygenase superfamily protein
			AT5G43690	Cytosolic sulfotransferase 1 (EC 2.8.2.-) (AtSOT1) [SOT1] [MQD19.2]	P-loop containing nucleoside triphosphate hydrolases superfamily protein
			AT5G43700	Auxin-responsive protein IAA4 (Auxin-induced protein AUX2-11) (Indoleacetic acid-induced protein 4) [IAA4] [AUX2-11] [MQD19.3]	AUX/IAA transcriptional regulator family protein
			AT5G44250		Protein of unknown function DUF829, transmembrane 53
			AT5G44260	Zinc finger CCCH domain-containing protein 61 (AtC3H61) (Tandem CCCH Zinc Finger protein 5) (AtTZF5) [TZF5] [K9L2.1]	Zinc finger C-x8-C-x5-C-x3-H type family protein
			AT5G44680		DNA glycosylase superfamily protein
			AT5G46240	Potassium channel KAT1 [KAT1] [MPL12.2]	potassium channel in Arabidopsis thaliana 1
			AT5G46360	Potassium inward rectifier (Kir)-like channel 3 (AtKCO3) [KCO3] [MPL12.16]	Ca2+ activated outward rectifying K+ channel 3
			AT5G46370	Two-pore potassium channel 2 (AtTPK2) (Calcium-activated outward-rectifying potassium channel 2) (AtKCO2) [TPK2] [KCO2] [MPL12.17]	Ca2+ activated outward rectifying K+ channel 2
			AT5G47060	FCS-Like Zinc finger 1 [FLZ1] [DUF581-16] [MQD22.20]	Protein of unknown function (DUF581)
			AT5G47370	Homeobox-leucine zipper protein HAT2 (Homeodomain-leucine zipper protein HAT2) (HD-ZIP protein 2) [HAT2] [MQL5.23]	Homeobox-leucine zipper protein 4 (HB-4) / HD-ZIP protein
			AT5G47800	BTB/POZ domain-containing protein At5g47800 [MCA23.12]	Phototropic-responsive NPH3 family protein
			AT5G49630	Amino acid permease 6 (Amino acid transporter AAP6) [AAP6] [MNI5.1]	amino acid permease 6
			AT5G50090
			AT5G50130		NAD(P)-binding Rossmann-fold superfamily protein
			AT5G50335
			AT5G50915	Transcription factor bHLH137 (Basic helix-loop-helix protein 137) (AtbHLH137) (bHLH 137) (Transcription factor EN 89) (bHLH transcription factor bHLH137) [BHLH137] [EN89] [K3K7]	basic helix-loop-helix (bHLH) DNA-binding superfamily protein
			AT5G51380	F-box protein At5g51380 [MFG13.9]	RNI-like superfamily protein
			AT5G51790	Transcription factor bHLH120 (Basic helix-loop-helix protein 120) (AtbHLH120) (bHLH 120) (Transcription factor EN 4) (bHLH transcription factor bHLH120) [BHLH120] [EN4][MIO24.8]	basic helix-loop-helix (bHLH) DNA-binding superfamily protein
			AT5G51810	Gibberellin 20 oxidase 2 (EC 1.14.11.-) (GA 20-oxidase 2) (Gibberellin C-20 oxidase 2) [GA20OX2] [20ox] [At2353] [MIO24.5]	gibberellin 20 oxidase 2
			AT5G52810	Protein SAR DEFICIENT 4 precursor (Ornithine cyclodeaminase-like protein) (AtOCD) [SARD4] [OCD] [MXC20.2]	NAD(P)-binding Rossmann-fold superfamily protein
			AT5G52870	Membrane-associated kinase regulator 5 [MAKR5] [MXC20.9]
			AT5G52890		AT hook motif-containing protein
			AT5G52900	Probable membrane-associated kinase regulator 6 [MAKR6] [MXC20.13]
			AT5G53290	Ethylene-responsive transcription factor CRF3 (Protein CYTOKININ RESPONSE FACTOR 3) [CRF3] [ERF065] [K19E1.9]	cytokinin response factor 3
			AT5G53900		Serine/threonine-protein kinase WNK (With No Lysine)-related
			AT5G54130		Calcium-binding endonuclease/exonuclease/phosphatase family
			AT5G54470		B-box type zinc finger family protein
			AT5G54490	Calcium-binding protein PBP1 (KIC-related protein 2) (PINOID-binding protein 1) [PBP1] [KRP2] [F24B18.11]	pinoid-binding protein 1
			AT5G54500	NAD(P)H dehydrogenase (quinone) FQR1 (EC 1.6.5.2) (Flavodoxin-like quinone reductase 1) [FQR1] [F24B18.12]	flavodoxin-like quinone reductase 1
			AT5G54510	Indole-3-acetic acid-amido synthetase GH3.6 (EC 6.3.2.-) (Auxin-responsive GH3-like protein 6) (AtGH3-6) (Protein DWARF IN LIGHT 1) (DFL-1) [GH3.6] [DFL1] [F24B18.13]	Auxin-responsive GH3 family protein
			AT5G54585
			AT5G56730	Zinc protease PQQL-like (EC 3.4.24.-) [MIK19.18]	Insulinase (Peptidase family M16) protein
			AT5G56970	Cytokinin dehydrogenase 3 precursor (EC 1.5.99.12) (Cytokinin oxidase 3) (AtCKX3) (CKO 3) [CKX3] [MHM17.8]	cytokinin oxidase 3
			AT5G57100	Nucleotide-sugar uncharacterized transporter 1 [MUL3.4]	Nucleotide/sugar transporter family protein
			AT5G57340
			AT5G57520	Zinc finger protein 2 (AtZFP2) [ZFP2] [MUA2.9]	zinc finger protein 2
			AT5G58580	RING-H2 finger protein ATL63 (EC 2.3.2.27) (Protein ARABIDOPSIS TOXICOS EN LEVADURA 63) (Protein ATL63) (RING-type E3 ubiquitin transferase ATL63) [ATL63] [MZN1.3]	TOXICOS EN LEVADURA 63
			AT5G58620	Zinc finger CCCH domain-containing protein 66 (AtC3H66) [MZN1.16] [MZN1.8]	zinc finger (CCCH-type) family protein
			AT5G59010	Serine/threonine-protein kinase BSK5 (EC 2.7.11.1) (Brassinosteroid-signaling kinase 5) [BSK5] [K19M22.7]	Protein kinase protein with tetratricopeptide repeat domain
			AT5G59240	40S ribosomal protein S8-2 [RPS8B] [MNC17.15]	Ribosomal protein S8e family protein
			AT5G59360	Cyclin-dependent protein kinase inhibitor SMR14 (Cyclin-dependent protein kinase inhibitor SMR13) (Protein SIAMESE-RELATED 13) (Protein SIAMESE-RELATED 14) [SMR14] [SMR13] [F2O15.2]
			AT5G59510	Small polypeptide DEVIL 18 (Small polypeptide ROTUNDIFOLIA LIKE 5) (Small polypeptide ROT-FOUR-LIKE 5) [DVL18] [RTFL5] [F2O15.21]	ROTUNDIFOLIA like 5
			AT5G60450	Auxin response factor 4 [ARF4] [MUF9.8]	auxin response factor 4
			AT5G62000	Auxin response factor 2 (ARF1-binding protein) (ARF1-BP) (Protein MEGAINTEGUMENTA) [ARF2] [MNT] [MTG10.3]	auxin response factor 2
			AT5G62170
			AT5G62280		Protein of unknown function (DUF1442)
			AT5G63790	NAC domain-containing protein 102 (ANAC102) [NAC102] [MBK5.27]	NAC domain containing protein 102
			AT5G64770	Protein GOLVEN 2 precursor (CLAVATA3/ESR (CLE)-related protein CLEL9) (CLE-Like protein 9) (Root meristem growth factor 9) (AtRGF9) [Contains: GLV2p] [GLV2] [CLEL9] [RGF9] [MVP7.10]
			AT5G64780		Uncharacterised conserved protein UCP009193
			AT5G65100	ETHYLENE INSENSITIVE 3-like 5 protein [EIL5] [MQN23.3]	Ethylene insensitive 3 family protein
			AT5G65510	AP2-like ethylene-responsive transcription factor AIL7 (Protein AINTEGUMENTA-LIKE 7) [AIL7] [K21L13.1]	AINTEGUMENTA-like 7
			AT5G65610
			AT5G65670	Auxin-responsive protein IAA9 (Indoleacetic acid-induced protein 9) [IAA9] [F6H11.210] [MPA24.1]	indole-3-acetic acid inducible 9
			AT5G65800	1-aminocyclopropane-1-carboxylate synthase 5 (EC 4.4.1.14) (ACC synthase 5) (Ethylene-overproduction protein 2) (S-adenosyl-L-methionine methylthioadenosine-lyase 5) [ACS5] [ACC5] [ETO2] [F6H11.90] [MPA24.15]	ACC synthase 5
			AT5G66080	Probable protein phosphatase 2C 79 precursor (EC 3.1.3.16) (AtPP2C79) [K2A18.16]	Protein phosphatase 2C family protein
			AT5G66260	SAUR11	SAUR-like auxin-responsive protein family
			AT5G66300	NAC domain-containing protein 105 (ANAC105) (Protein VASCULAR RELATED NAC-DOMAIN 3) [NAC105] [VND3] [K1L20.8]	NAC domain containing protein 105
			AT5G66580
			AT5G66590		CAP (Cysteine-rich secretory proteins, Antigen 5, and Pathogenesis-related 1 protein) superfamily protein
			AT5G66940	Dof zinc finger protein DOF5.8 (AtDOF5.8) [DOF5.8] [K8A10.1]	Dof-type zinc finger DNA-binding family protein
			AT5G67430		Acyl-CoA N-acyltransferases (NAT) superfamily protein
			ATCG00750	30S ribosomal protein S11, chloroplastic [rps11]	ribosomal protein S11
			ATMG00090	Ribosomal protein S3, mitochondrial [RPS3]	structural constituent of ribosome;protein binding

## Sheet: Down-regulated in darkness
Auxin down-regulated genes in the dark
D5.Down	annotate	Short_description	D50.Down	annotate.1	Short_description.1	D50/D5.Down	annotate.2	Short_description.2	Only.D5.Down	annotate.3	Short_description.3	Only.D50.Down	annotate.4	Short_description.4	Only.D50/D5.Down	annotate.5	Short_description.5	D5.Down.&.D50.Down	annotate.6	Short_description.6	D50.Down.&.D50/L5.Down	annotate.7	Short_description.7	D5.Down.&.D50.Down.&.D50/D5.Down	annotate.8	Short_description.8
AT1G04180	Probable indole-3-pyruvate monooxygenase YUCCA9 (EC 1.14.13.168) (Flavin-containing monooxygenase YUCCA9) [YUC9] [YUCCA9] [F20D22.5]	YUCCA 9	AT1G01140	CBL-interacting serine/threonine-protein kinase 9 (EC 2.7.11.1) (SNF1-related kinase 3.12) (SOS2-like protein kinase PKS6) [CIPK9] [PKS6] [SnRK3.12] [F6F3.28] [T25K16.13]	CBL-interacting protein kinase 9	AT1G67070	Mannose-6-phosphate isomerase 2 (EC 5.3.1.8) (Phosphohexomutase 2) (Phosphomannose isomerase 2) (PMI2) (Protein DARK INDUCIBLE 9) [PMI2] [DIN9] [F1O19.12]	Mannose-6-phosphate isomerase, type I	AT1G13080	Cytochrome P450 71B2 (EC 1.14.-.-) [CYP71B2] [F3F19.10]	cytochrome P450, family 71, subfamily B, polypeptide 2	AT1G01140	CBL-interacting serine/threonine-protein kinase 9 (EC 2.7.11.1) (SNF1-related kinase 3.12) (SOS2-like protein kinase PKS6) [CIPK9] [PKS6] [SnRK3.12] [F6F3.28] [T25K16.13]	CBL-interacting protein kinase 9	AT3G07440			AT1G04180	Probable indole-3-pyruvate monooxygenase YUCCA9 (EC 1.14.13.168) (Flavin-containing monooxygenase YUCCA9) [YUC9] [YUCCA9] [F20D22.5]	YUCCA 9	AT1G67070	Mannose-6-phosphate isomerase 2 (EC 5.3.1.8) (Phosphohexomutase 2) (Phosphomannose isomerase 2) (PMI2) (Protein DARK INDUCIBLE 9) [PMI2] [DIN9] [F1O19.12]	Mannose-6-phosphate isomerase, type I	AT1G67110
AT1G06980			AT1G01420	UDP-glycosyltransferase 72B3 (EC 2.4.1.-) [UGT72B3] [F6F3.22]	UDP-glucosyl transferase 72B3	AT1G67110	Cytokinin hydroxylase (EC 1.14.13.-) (Cytochrome P450 35A2) [CYP735A2] [F5A8.3]	cytochrome P450, family 735, subfamily A, polypeptide 2	AT1G13420	Cytosolic sulfotransferase 8 (EC 2.8.2.-) (AtSOT8) (Sulfotransferase 4b) (AtST4b) [SOT8] [ST4B] [T6J4.16]	sulfotransferase 4B	AT1G01420	UDP-glycosyltransferase 72B3 (EC 2.4.1.-) [UGT72B3] [F6F3.22]	UDP-glucosyl transferase 72B3	AT5G13930	Chalcone synthase (EC 2.3.1.74) (Naringenin-chalcone synthase) (Protein TRANSPARENT TESTA 4) [CHS] [TT4] [MAC12.11] [MAC12.14]	Chalcone and stilbene synthase family protein	AT1G06980			AT2G02950	Protein PHYTOCHROME KINASE SUBSTRATE 1 [PKS1] [T17M13.12]	phytochrome kinase substrate 1	AT3G13730	3-epi-6-deoxocathasterone 23-monooxygenase CYP90D1 (EC 1.14.14.147) (Cytochrome P450 90D1) [CYP90D1] [MMM17.15]	cytochrome P450, family 90, subfamily D, polypeptide 1
AT1G07900	LOB domain-containing protein 1 (ASYMMETRIC LEAVES 2-like protein 8) (AS2-like protein 8) [LBD1] [ASL8] [F24B9.1]	LOB domain-containing protein 1	AT1G04180	Probable indole-3-pyruvate monooxygenase YUCCA9 (EC 1.14.13.168) (Flavin-containing monooxygenase YUCCA9) [YUC9] [YUCCA9] [F20D22.5]	YUCCA 9	AT2G02950	Protein PHYTOCHROME KINASE SUBSTRATE 1 [PKS1] [T17M13.12]	phytochrome kinase substrate 1	AT1G15040	Putative glutamine amidotransferase GAT1_2.1 (EC 2.4.2.-) (Class I glutamine amidotransferase) (GAT1_2 domain-containing protein 1) [GAT1_2.1] [GAT] [T15D22.12]	Class I glutamine amidotransferase-like superfamily protein	AT1G05300	Zinc transporter 5 precursor (ZRT/IRT-like protein 5) [ZIP5] [YUP8H12.8]	zinc transporter 5 precursor	AT5G54770	Thiamine thiazole synthase, chloroplastic precursor (EC 2.4.2.60) (Thiazole biosynthetic enzyme) [THI1] [ARA6] [THI4] [MBG8.3]	thiazole biosynthetic enzyme, chloroplast (ARA6) (THI1) (THI4)	AT1G07900	LOB domain-containing protein 1 (ASYMMETRIC LEAVES 2-like protein 8) (AS2-like protein 8) [LBD1] [ASL8] [F24B9.1]	LOB domain-containing protein 1	AT2G36870	Probable xyloglucan endotransglucosylase/hydrolase protein 32 precursor (EC 2.4.1.207) (At-XTH32) (XTH-32) [XTH32] [T1J8.5]	xyloglucan endotransglucosylase/hydrolase 32
AT1G09530	Transcription factor PIF3 (Basic helix-loop-helix protein 8) (AtbHLH8) (bHLH 8) (Phytochrome-associated protein 3) (Phytochrome-interacting factor 3) (Transcription factor EN 100) (bHLH transcription factor bHLH008) [PIF3] [BHLH8] [EN100] [PAP3] [F14J9.19]	phytochrome interacting factor 3	AT1G05300	Zinc transporter 5 precursor (ZRT/IRT-like protein 5) [ZIP5] [YUP8H12.8]	zinc transporter 5 precursor	AT2G36870	Probable xyloglucan endotransglucosylase/hydrolase protein 32 precursor (EC 2.4.1.207) (At-XTH32) (XTH-32) [XTH32] [T1J8.5]	xyloglucan endotransglucosylase/hydrolase 32	AT1G33770		Protein kinase superfamily protein	AT1G05650		Pectin lyase-like superfamily protein	AT5G64620	Cell wall / vacuolar inhibitor of fructosidase 2 precursor (AtC/VIF2) [C/VIF2] [CIF2] [VIF2] [MUB3.14]	cell wall / vacuolar inhibitor of fructosidase 2	AT1G09530	Transcription factor PIF3 (Basic helix-loop-helix protein 8) (AtbHLH8) (bHLH 8) (Phytochrome-associated protein 3) (Phytochrome-interacting factor 3) (Transcription factor EN 100) (bHLH transcription factor bHLH008) [PIF3] [BHLH8] [EN100] [PAP3] [F14J9.19]	phytochrome interacting factor 3	AT3G21560	UDP-glycosyltransferase 84A2 (Protein BRIGHT TRICHOMES 1) (Sinapate 1-glucosyltransferase 1) (EC 2.4.1.120) (AtSGT1) [UGT84A2] [BRT1] [SGT] [SGT1] [MIL23.13]	UDP-Glycosyltransferase superfamily protein
AT1G11450	WAT1-related protein At1g11450 [T23J18.12]	nodulin MtN21 /EamA-like transporter family protein	AT1G05650		Pectin lyase-like superfamily protein	AT3G07440			AT1G35210			AT1G05660		Pectin lyase-like superfamily protein	ATCG00020	Photosystem II protein D1 precursor (EC 1.10.3.9) (PSII D1 protein) (Photosystem II Q(B) protein) [psbA]	photosystem II reaction center protein A	AT1G11450	WAT1-related protein At1g11450 [T23J18.12]	nodulin MtN21 /EamA-like transporter family protein	AT4G14250	Putative plant UBX domain-containing protein 14 (PUX14) [PUX14] [dl3165c] [FCAALL.151]	structural constituent of ribosome
AT1G12200	Flavin-containing monooxygenase FMO GS-OX-like 2 (EC 1.8.-.-) (Flavin-monooxygenase glucosinolate S-oxygenase-like 2) [T28K15.7]	Flavin-binding monooxygenase family protein	AT1G05660		Pectin lyase-like superfamily protein	AT3G13730	3-epi-6-deoxocathasterone 23-monooxygenase CYP90D1 (EC 1.14.14.147) (Cytochrome P450 90D1) [CYP90D1] [MMM17.15]	cytochrome P450, family 90, subfamily D, polypeptide 1	AT1G52343			AT1G05805	Transcription factor bHLH128 (Basic helix-loop-helix protein 128) (AtbHLH128) (bHLH 128) (Transcription factor EN 74) (bHLH transcription factor bHLH128) [BHLH128] [EN74] [T20M3.7]	basic helix-loop-helix (bHLH) DNA-binding superfamily protein	ATCG00120	ATP synthase subunit alpha, chloroplastic (EC 7.1.2.2) (ATP synthase F1 sector subunit alpha) (F-ATPase subunit alpha) [atpA]	ATP synthase subunit alpha	AT1G12200	Flavin-containing monooxygenase FMO GS-OX-like 2 (EC 1.8.-.-) (Flavin-monooxygenase glucosinolate S-oxygenase-like 2) [T28K15.7]	Flavin-binding monooxygenase family protein	AT5G39760	Zinc-finger homeodomain protein 10 (AtZHD10) (Homeobox protein 23) (AtHB-23) [ZHD10] [HB23] [MKM21.8]	homeobox protein 23
AT1G13080	Cytochrome P450 71B2 (EC 1.14.-.-) [CYP71B2] [F3F19.10]	cytochrome P450, family 71, subfamily B, polypeptide 2	AT1G05805	Transcription factor bHLH128 (Basic helix-loop-helix protein 128) (AtbHLH128) (bHLH 128) (Transcription factor EN 74) (bHLH transcription factor bHLH128) [BHLH128] [EN74] [T20M3.7]	basic helix-loop-helix (bHLH) DNA-binding superfamily protein	AT3G21560	UDP-glycosyltransferase 84A2 (Protein BRIGHT TRICHOMES 1) (Sinapate 1-glucosyltransferase 1) (EC 2.4.1.120) (AtSGT1) [UGT84A2] [BRT1] [SGT] [SGT1] [MIL23.13]	UDP-Glycosyltransferase superfamily protein	AT1G72200	RING-H2 finger protein ATL11 precursor (EC 2.3.2.27) (RING-type E3 ubiquitin transferase ATL11) [ATL11] [T9N14.11]	RING/U-box superfamily protein	AT1G08590	Leucine-rich repeat receptor-like protein kinase PXL1 precursor (EC 2.7.11.1) (Protein PHLOEM INTERCALATED WITH XYLEM-LIKE 1) [PXL1] [F22O13.7]	Leucine-rich receptor-like protein kinase family protein	ATCG00150	ATP synthase subunit a, chloroplastic (ATP synthase F0 sector subunit a) (F-ATPase subunit IV) [atpI]	ATPase, F0 complex, subunit A protein	AT1G15100	E3 ubiquitin-protein ligase RHA2A (EC 2.3.2.27) (RING-H2 finger A2a) (RING-H2 zinc finger protein RHA2a) (RING-type E3 ubiquitin transferase RHA2A) [RHA2A] [F9L1.3]	RING-H2 finger A2A	AT5G43420	RING-H2 finger protein ATL16 (EC 2.3.2.27) (RING-type E3 ubiquitin transferase ATL16) [ATL16] [MWF20.13]	RING/U-box superfamily protein
AT1G13420	Cytosolic sulfotransferase 8 (EC 2.8.2.-) (AtSOT8) (Sulfotransferase 4b) (AtST4b) [SOT8] [ST4B] [T6J4.16]	sulfotransferase 4B	AT1G06980			AT4G14250	Putative plant UBX domain-containing protein 14 (PUX14) [PUX14] [dl3165c] [FCAALL.151]	structural constituent of ribosome	AT1G77145		Protein of unknown function (DUF506)	AT1G10480	Zinc finger protein 5 [ZFP5] [T10O24.9]	zinc finger protein 5	ATCG00280	Photosystem II CP43 reaction center protein precursor (PSII 43 kDa protein) (Protein CP-43) [psbC] [CP43]	photosystem II reaction center protein C	AT1G21110	Indole glucosinolate O-methyltransferase 3 (EC 2.1.1.-) [IGMT3] [T22I11.6]	O-methyltransferase family protein	AT5G56860	GATA transcription factor 21 (Protein GATA, NITRATE-INDUCIBLE, CARBON-METABOLISM INVOLVED) (AtGNC) [GATA21] [GNC] [MPI10.2]	GATA type zinc finger transcription factor family protein
AT1G15040	Putative glutamine amidotransferase GAT1_2.1 (EC 2.4.2.-) (Class I glutamine amidotransferase) (GAT1_2 domain-containing protein 1) [GAT1_2.1] [GAT] [T15D22.12]	Class I glutamine amidotransferase-like superfamily protein	AT1G07900	LOB domain-containing protein 1 (ASYMMETRIC LEAVES 2-like protein 8) (AS2-like protein 8) [LBD1] [ASL8] [F24B9.1]	LOB domain-containing protein 1	AT5G13930	Chalcone synthase (EC 2.3.1.74) (Naringenin-chalcone synthase) (Protein TRANSPARENT TESTA 4) [CHS] [TT4] [MAC12.11] [MAC12.14]	Chalcone and stilbene synthase family protein	AT1G78815	Protein LIGHT-DEPENDENT SHORT HYPOCOTYLS 7 (Protein ORGAN BOUNDARY 7) [LSH7] [OBO7] [F9K20.14]	Protein of unknown function (DUF640)	AT1G11175		other RNA	ATCG00330	30S ribosomal protein S14, chloroplastic [rps14]	chloroplast ribosomal protein S14	AT1G21360	Glycolipid transfer protein 2 [GLTP2] [F24J8.2]	glycolipid transfer protein 2
AT1G15100	E3 ubiquitin-protein ligase RHA2A (EC 2.3.2.27) (RING-H2 finger A2a) (RING-H2 zinc finger protein RHA2a) (RING-type E3 ubiquitin transferase RHA2A) [RHA2A] [F9L1.3]	RING-H2 finger A2A	AT1G08590	Leucine-rich repeat receptor-like protein kinase PXL1 precursor (EC 2.7.11.1) (Protein PHLOEM INTERCALATED WITH XYLEM-LIKE 1) [PXL1] [F22O13.7]	Leucine-rich receptor-like protein kinase family protein	AT5G39760	Zinc-finger homeodomain protein 10 (AtZHD10) (Homeobox protein 23) (AtHB-23) [ZHD10] [HB23] [MKM21.8]	homeobox protein 23	AT2G03530	Ureide permease 2 (AtUPS2) [UPS2] [T4M8.3]	ureide permease 2	AT1G11700		Protein of unknown function, DUF584	ATCG00350	Photosystem I P700 chlorophyll a apoprotein A1 (EC 1.97.1.12) (PSI-A) (PsaA) [psaA]	Photosystem I, PsaA/PsaB protein	AT1G25230	Purple acid phosphatase 4 precursor (EC 3.1.3.2) [PAP4] [F4F7.38]	Calcineurin-like metallo-phosphoesterase superfamily protein
AT1G21110	Indole glucosinolate O-methyltransferase 3 (EC 2.1.1.-) [IGMT3] [T22I11.6]	O-methyltransferase family protein	AT1G09530	Transcription factor PIF3 (Basic helix-loop-helix protein 8) (AtbHLH8) (bHLH 8) (Phytochrome-associated protein 3) (Phytochrome-interacting factor 3) (Transcription factor EN 100) (bHLH transcription factor bHLH008) [PIF3] [BHLH8] [EN100] [PAP3] [F14J9.19]	phytochrome interacting factor 3	AT5G43420	RING-H2 finger protein ATL16 (EC 2.3.2.27) (RING-type E3 ubiquitin transferase ATL16) [ATL16] [MWF20.13]	RING/U-box superfamily protein	AT2G23680	Cold-regulated 413 plasma membrane protein 3 (AtCOR413-PM3) [F26B6.33]	Cold acclimation protein WCOR413 family	AT1G12320		Protein of unknown function (DUF1442)	ATCG00540	Cytochrome f precursor [petA]	photosynthetic electron transfer A	AT1G25530	Lysine histidine transporter-like 6 [F2J7.5]	Transmembrane amino acid transporter family protein
AT1G21360	Glycolipid transfer protein 2 [GLTP2] [F24J8.2]	glycolipid transfer protein 2	AT1G10480	Zinc finger protein 5 [ZFP5] [T10O24.9]	zinc finger protein 5	AT5G54770	Thiamine thiazole synthase, chloroplastic precursor (EC 2.4.2.60) (Thiazole biosynthetic enzyme) [THI1] [ARA6] [THI4] [MBG8.3]	thiazole biosynthetic enzyme, chloroplast (ARA6) (THI1) (THI4)	AT2G24140		Protein of unknown function, DUF593	AT1G14540	Peroxidase 4 precursor (EC 1.11.1.7) (Atperox P4) (ATP46) [PER4] [P4] [F14L17.32] [T5E21.4]	Peroxidase superfamily protein	ATCG00630	Photosystem I reaction center subunit IX (PSI-J) [psaJ]	PSAJ	AT1G29050	Protein trichome birefringence-like 38 [TBL38] [F28N24.24]	TRICHOME BIREFRINGENCE-LIKE 38
AT1G25230	Purple acid phosphatase 4 precursor (EC 3.1.3.2) [PAP4] [F4F7.38]	Calcineurin-like metallo-phosphoesterase superfamily protein	AT1G11175		other RNA	AT5G56860	GATA transcription factor 21 (Protein GATA, NITRATE-INDUCIBLE, CARBON-METABOLISM INVOLVED) (AtGNC) [GATA21] [GNC] [MPI10.2]	GATA type zinc finger transcription factor family protein	AT2G24970			AT1G16530	LOB domain-containing protein 3 (ASYMMETRIC LEAVES 2-like protein 9) (AS2-like protein 9) [LBD3] [ASL9] [F3O9.33]	ASYMMETRIC LEAVES 2-like 9	ATCG00640	50S ribosomal protein L33, chloroplastic [rpl33]	ribosomal protein L33	AT1G31820	Probable polyamine transporter At1g31820 [F5M6.17]	Amino acid permease family protein
AT1G25530	Lysine histidine transporter-like 6 [F2J7.5]	Transmembrane amino acid transporter family protein	AT1G11450	WAT1-related protein At1g11450 [T23J18.12]	nodulin MtN21 /EamA-like transporter family protein	AT5G64620	Cell wall / vacuolar inhibitor of fructosidase 2 precursor (AtC/VIF2) [C/VIF2] [CIF2] [VIF2] [MUB3.14]	cell wall / vacuolar inhibitor of fructosidase 2	AT2G24980		Proline-rich extensin-like family protein	AT1G17970		RING/U-box superfamily protein	ATCG00670	Chloroplastic ATP-dependent Clp protease proteolytic subunit 1 (EC 3.4.21.92) (Endopeptidase ClpP1) (pClpP) [clpP1] [ClpP]	plastid-encoded CLP P	AT1G33760	Ethylene-responsive transcription factor ERF022 [ERF022] [F14M2.12]	Integrase-type DNA-binding superfamily protein
AT1G29050	Protein trichome birefringence-like 38 [TBL38] [F28N24.24]	TRICHOME BIREFRINGENCE-LIKE 38	AT1G11700		Protein of unknown function, DUF584	ATCG00020	Photosystem II protein D1 precursor (EC 1.10.3.9) (PSII D1 protein) (Photosystem II Q(B) protein) [psbA]	photosystem II reaction center protein A	AT3G01175		Protein of unknown function (DUF1666)	AT1G18330	Protein REVEILLE 7 (Early-phytochrome-responsive 1) (MYB-related transcription factor EPR1) [RVE7] [EPR1] [F15H18.16]	Homeodomain-like superfamily protein	ATCG01070	NAD(P)H-quinone oxidoreductase subunit 4L, chloroplastic (EC 7.1.1.-) (NAD(P)H dehydrogenase subunit 4L) (NADH-plastoquinone oxidoreductase subunit 4L) [ndhE]	NADH-ubiquinone/plastoquinone oxidoreductase chain 4L	AT1G44160		HSP40/DnaJ peptide-binding protein
AT1G31820	Probable polyamine transporter At1g31820 [F5M6.17]	Amino acid permease family protein	AT1G12200	Flavin-containing monooxygenase FMO GS-OX-like 2 (EC 1.8.-.-) (Flavin-monooxygenase glucosinolate S-oxygenase-like 2) [T28K15.7]	Flavin-binding monooxygenase family protein	ATCG00120	ATP synthase subunit alpha, chloroplastic (EC 7.1.2.2) (ATP synthase F1 sector subunit alpha) (F-ATPase subunit alpha) [atpA]	ATP synthase subunit alpha	AT3G22910	Putative calcium-transporting ATPase 13, plasma membrane-type (EC 7.2.2.10) (Ca(2+)-ATPase isoform 13) [ACA13] [F5N5.8]	ATPase E1-E2 type family protein / haloacid dehalogenase-like hydrolase family protein	AT1G18880	Protein NRT1/ PTR FAMILY 2.9 (AtNPF2.9) (Nitrate transporter 1.9) [NPF2.9] [NRT1.9] [F6A14.2]	Major facilitator superfamily protein	ATCG01080	NAD(P)H-quinone oxidoreductase subunit 6, chloroplastic (EC 7.1.1.-) (NAD(P)H dehydrogenase subunit 6) (NADH-plastoquinone oxidoreductase subunit 6) [ndhG]	NADH:ubiquinone/plastoquinone oxidoreductase, chain 6	AT1G44608
AT1G33760	Ethylene-responsive transcription factor ERF022 [ERF022] [F14M2.12]	Integrase-type DNA-binding superfamily protein	AT1G12320		Protein of unknown function (DUF1442)	ATCG00150	ATP synthase subunit a, chloroplastic (ATP synthase F0 sector subunit a) (F-ATPase subunit IV) [atpI]	ATPase, F0 complex, subunit A protein	AT3G28315		transposable element gene	AT1G19350	Protein BRASSINAZOLE-RESISTANT 2 (Protein 107) (Protein BIN2 SUBSTRATE 1) (Protein BRI1-EMS-SUPPRESSOR 1) [BZR2] [BES1] [BIS1] [F18O14_4]	Brassinosteroid signalling positive regulator (BZR1) family protein				AT1G45201		triacylglycerol lipase-like 1
AT1G33770		Protein kinase superfamily protein	AT1G14540	Peroxidase 4 precursor (EC 1.11.1.7) (Atperox P4) (ATP46) [PER4] [P4] [F14L17.32] [T5E21.4]	Peroxidase superfamily protein	ATCG00280	Photosystem II CP43 reaction center protein precursor (PSII 43 kDa protein) (Protein CP-43) [psbC] [CP43]	photosystem II reaction center protein C	AT3G46700	UDP-glycosyltransferase 76E3 (EC 2.4.1.-) [UGT76E3] [T6H20.270]	UDP-Glycosyltransferase superfamily protein	AT1G21120	Indole glucosinolate O-methyltransferase 2 (EC 2.1.1.-) [IGMT2] [T22I11.5]	O-methyltransferase family protein				AT1G48260	CBL-interacting serine/threonine-protein kinase 17 (EC 2.7.11.1) (SNF1-related kinase 3.21) (SOS2-like protein kinase PKS20) [CIPK17] [PKS20] [SnRK3.21] [F11A17.18] [F21D18.2]	CBL-interacting protein kinase 17
AT1G35210			AT1G15100	E3 ubiquitin-protein ligase RHA2A (EC 2.3.2.27) (RING-H2 finger A2a) (RING-H2 zinc finger protein RHA2a) (RING-type E3 ubiquitin transferase RHA2A) [RHA2A] [F9L1.3]	RING-H2 finger A2A	ATCG00330	30S ribosomal protein S14, chloroplastic [rps14]	chloroplast ribosomal protein S14	AT3G49960	Peroxidase 35 precursor (EC 1.11.1.7) (Atperox P35) (ATP21a) [PER35] [P35] [F3A4.40]	Peroxidase superfamily protein	AT1G21130	Indole glucosinolate O-methyltransferase 4 (EC 2.1.1.-) [IGMT4] [T22I11.4]	O-methyltransferase family protein				AT1G50040		Protein of unknown function (DUF1005)
AT1G44160		HSP40/DnaJ peptide-binding protein	AT1G16530	LOB domain-containing protein 3 (ASYMMETRIC LEAVES 2-like protein 9) (AS2-like protein 9) [LBD3] [ASL9] [F3O9.33]	ASYMMETRIC LEAVES 2-like 9	ATCG00350	Photosystem I P700 chlorophyll a apoprotein A1 (EC 1.97.1.12) (PSI-A) (PsaA) [psaA]	Photosystem I, PsaA/PsaB protein	AT3G50810	CASP-like protein 5C2 (AtCASPL5C2) [F18B3.90]	Uncharacterised protein family (UPF0497)	AT1G22220	F-box protein AUF2 (F-box protein At1g22220) (Protein AUXIN UP-REGULATED F-BOX PROTEIN 2) [AUF2] [F16L1.5]	F-box family protein				AT1G52342
AT1G44608			AT1G17970		RING/U-box superfamily protein	ATCG00540	Cytochrome f precursor [petA]	photosynthetic electron transfer A	AT3G54590	Extensin-2 precursor (AtExt2) (Cell wall hydroxyproline-rich glycoprotein 1) (HRGP1) [EXT2] [HRGP1] [T14E10.160]	hydroxyproline-rich glycoprotein	AT1G22230						AT1G56010	NAC domain-containing protein 21/22 (ANAC021/ANAC022) [NAC021] [NAC022] [NAC1] [F14J16.32] [T6H22.19]	NAC domain containing protein 1
AT1G45201		triacylglycerol lipase-like 1	AT1G18330	Protein REVEILLE 7 (Early-phytochrome-responsive 1) (MYB-related transcription factor EPR1) [RVE7] [EPR1] [F15H18.16]	Homeodomain-like superfamily protein	ATCG00630	Photosystem I reaction center subunit IX (PSI-J) [psaJ]	PSAJ	AT3G56400	Probable WRKY transcription factor 70 (WRKY DNA-binding protein 70) [WRKY70] [T5P19.50]	WRKY DNA-binding protein 70	AT1G26560	Beta-glucosidase 40 precursor (EC 3.2.1.21) (AtBGLU40) [BGLU40] [T1K7.7]	beta glucosidase 40				AT1G59940	Two-component response regulator ARR3 [ARR3] [F23H11.25]	response regulator 3
AT1G48260	CBL-interacting serine/threonine-protein kinase 17 (EC 2.7.11.1) (SNF1-related kinase 3.21) (SOS2-like protein kinase PKS20) [CIPK17] [PKS20] [SnRK3.21] [F11A17.18] [F21D18.2]	CBL-interacting protein kinase 17	AT1G18880	Protein NRT1/ PTR FAMILY 2.9 (AtNPF2.9) (Nitrate transporter 1.9) [NPF2.9] [NRT1.9] [F6A14.2]	Major facilitator superfamily protein	ATCG00640	50S ribosomal protein L33, chloroplastic [rpl33]	ribosomal protein L33	AT3G57157		other RNA	AT1G27020						AT1G62280	S-type anion channel SLAH1 (SLAC1-homolog protein 1) [SLAH1] [F19K23.20]	SLAC1 homologue 1
AT1G50040		Protein of unknown function (DUF1005)	AT1G19350	Protein BRASSINAZOLE-RESISTANT 2 (Protein 107) (Protein BIN2 SUBSTRATE 1) (Protein BRI1-EMS-SUPPRESSOR 1) [BZR2] [BES1] [BIS1] [F18O14_4]	Brassinosteroid signalling positive regulator (BZR1) family protein	ATCG00670	Chloroplastic ATP-dependent Clp protease proteolytic subunit 1 (EC 3.4.21.92) (Endopeptidase ClpP1) (pClpP) [clpP1] [ClpP]	plastid-encoded CLP P	AT3G62680	Proline-rich protein 3 precursor (AtPRP3) [PRP3] [F26K9.110]	proline-rich protein 3	AT1G28010	ABC transporter B family member 14 (ABC transporter ABCB.14) (AtABCB14) (Multidrug resistance protein 12) (P-glycoprotein 14) [ABCB14] [MDR12] [PGP14] [F13K9.11]	P-glycoprotein 14				AT1G64590		NAD(P)-binding Rossmann-fold superfamily protein
AT1G52342			AT1G21110	Indole glucosinolate O-methyltransferase 3 (EC 2.1.1.-) [IGMT3] [T22I11.6]	O-methyltransferase family protein	ATCG01070	NAD(P)H-quinone oxidoreductase subunit 4L, chloroplastic (EC 7.1.1.-) (NAD(P)H dehydrogenase subunit 4L) (NADH-plastoquinone oxidoreductase subunit 4L) [ndhE]	NADH-ubiquinone/plastoquinone oxidoreductase chain 4L	AT4G22080	Probable pectate lyase 16 precursor (EC 4.2.2.2) [F1N20.180]	root hair specific 14	AT1G28100	Protein NEOXANTHIN-DEFICIENT 1 [NDX1] [F13K9.27]					AT1G66800		NAD(P)-binding Rossmann-fold superfamily protein
AT1G52343			AT1G21120	Indole glucosinolate O-methyltransferase 2 (EC 2.1.1.-) [IGMT2] [T22I11.5]	O-methyltransferase family protein	ATCG01080	NAD(P)H-quinone oxidoreductase subunit 6, chloroplastic (EC 7.1.1.-) (NAD(P)H dehydrogenase subunit 6) (NADH-plastoquinone oxidoreductase subunit 6) [ndhG]	NADH:ubiquinone/plastoquinone oxidoreductase, chain 6	AT4G26010	Peroxidase 44 precursor (EC 1.11.1.7) (Atperox P44) (ATP35) [PER44] [P44] [F20B18.120]	Peroxidase superfamily protein	AT1G29025		Calcium-binding EF-hand family protein				AT1G67030	Zinc finger protein 6 [ZFP6] [ZEP6] [F1O19.8] [F1O19_5]	zinc finger protein 6
AT1G56010	NAC domain-containing protein 21/22 (ANAC021/ANAC022) [NAC021] [NAC022] [NAC1] [F14J16.32] [T6H22.19]	NAC domain containing protein 1	AT1G21130	Indole glucosinolate O-methyltransferase 4 (EC 2.1.1.-) [IGMT4] [T22I11.4]	O-methyltransferase family protein				AT4G34540	Probable pinoresinol-lariciresinol reductase 3 (EC 1.23.1.-) (AtPLR3) (lariciresinol reductase) [PLR3] [T4L20.120]	NmrA-like negative transcriptional regulator family protein	AT1G29400	Protein MEI2-like 5 (AML5) (MEI2-like protein 5) [ML5] [F15D2.30]	MEI2-like protein 5				AT1G69080		Adenine nucleotide alpha hydrolases-like superfamily protein
AT1G59940	Two-component response regulator ARR3 [ARR3] [F23H11.25]	response regulator 3	AT1G21360	Glycolipid transfer protein 2 [GLTP2] [F24J8.2]	glycolipid transfer protein 2				AT4G36830	Elongation of fatty acids protein 3-like (EC 2.3.1.-) (Protein ELO3-like) (Protein HIGH EXPRESSION OF OSMOTICALLY RESPONSIVE GENES 3) (Very long-chain fatty acid condensing enzyme HOS3) (VLCFA condensing enzyme HOS3) [HOS3] [AP22.81] [C7A10.530]	GNS1/SUR4 membrane protein family	AT1G30040	Gibberellin 2-beta-dioxygenase 2 (EC 1.14.11.13) (GA 2-oxidase 2) (Gibberellin 2-beta-hydroxylase 2) (Gibberellin 2-oxidase 2) [GA2OX2] [T1P2.6]	gibberellin 2-oxidase				AT1G72510		Protein of unknown function (DUF1677)
AT1G62280	S-type anion channel SLAH1 (SLAC1-homolog protein 1) [SLAH1] [F19K23.20]	SLAC1 homologue 1	AT1G22220	F-box protein AUF2 (F-box protein At1g22220) (Protein AUXIN UP-REGULATED F-BOX PROTEIN 2) [AUF2] [F16L1.5]	F-box family protein				AT5G01250		alpha 1,4-glycosyltransferase family protein	AT1G30370		alpha/beta-Hydrolases superfamily protein				AT1G73210		Protein of unknown function (DUF789)
AT1G64590		NAD(P)-binding Rossmann-fold superfamily protein	AT1G22230						AT5G06280			AT1G31050	Transcription factor bHLH111 (Basic helix-loop-helix protein 111) (AtbHLH111) (bHLH 111) (Transcription factor EN 66) (bHLH transcription factor bHLH111) [BHLH111] [EN66] [F17F8.3]	basic helix-loop-helix (bHLH) DNA-binding superfamily protein				AT1G74840		Homeodomain-like superfamily protein
AT1G66800		NAD(P)-binding Rossmann-fold superfamily protein	AT1G25230	Purple acid phosphatase 4 precursor (EC 3.1.3.2) [PAP4] [F4F7.38]	Calcineurin-like metallo-phosphoesterase superfamily protein				AT5G06630		proline-rich extensin-like family protein	AT1G31770	ABC transporter G family member 14 (ABC transporter ABCG.14) (AtABCG14) (Protein INSENSITIVE TO TEMPERATURE 211) (White-brown complex homolog protein 14) (AtWBC14) [ABCG14] [INT211] [WBC14] [F27M3.2] [F5M6.22]	ATP-binding cassette 14				AT1G74940	FCS-Like Zinc finger 13 [FLZ13] [DUF581-5] [F25A4.9] [F9E10.21]	Protein of unknown function (DUF581)
AT1G67030	Zinc finger protein 6 [ZFP6] [ZEP6] [F1O19.8] [F1O19_5]	zinc finger protein 6	AT1G25530	Lysine histidine transporter-like 6 [F2J7.5]	Transmembrane amino acid transporter family protein				AT5G06640		Proline-rich extensin-like family protein	AT1G32090	CSC1-like protein At1g32090 [F3C3.11] [T12O21.1]	early-responsive to dehydration stress protein (ERD4)				AT1G76210		Arabidopsis protein of unknown function (DUF241)
AT1G67110	Cytokinin hydroxylase (EC 1.14.13.-) (Cytochrome P450 35A2) [CYP735A2] [F5A8.3]	cytochrome P450, family 735, subfamily A, polypeptide 2	AT1G26560	Beta-glucosidase 40 precursor (EC 3.2.1.21) (AtBGLU40) [BGLU40] [T1K7.7]	beta glucosidase 40				AT5G14940	Protein NRT1/ PTR FAMILY 5.8 (AtNPF5.8) [NPF5.8] [F2G14.60]	Major facilitator superfamily protein	AT1G45010		TRAM, LAG1 and CLN8 (TLC) lipid-sensing domain containing protein				AT1G77530		O-methyltransferase family protein
AT1G69080		Adenine nucleotide alpha hydrolases-like superfamily protein	AT1G27020						AT5G35190		proline-rich extensin-like family protein	AT1G47610		Transducin/WD40 repeat-like superfamily protein				AT2G01340
AT1G72200	RING-H2 finger protein ATL11 precursor (EC 2.3.2.27) (RING-type E3 ubiquitin transferase ATL11) [ATL11] [T9N14.11]	RING/U-box superfamily protein	AT1G28010	ABC transporter B family member 14 (ABC transporter ABCB.14) (AtABCB14) (Multidrug resistance protein 12) (P-glycoprotein 14) [ABCB14] [MDR12] [PGP14] [F13K9.11]	P-glycoprotein 14				AT5G39610	NAC domain-containing protein 92 (ANAC092) (AtNAC2) (AtNAC6) (Protein ORESARA 1) [NAC92] [NAC2] [NAC6] [ORE1] [MIJ24.11]	NAC domain containing protein 6	AT1G47960	Cell wall / vacuolar inhibitor of fructosidase 1 precursor (AtC/VIF1) [C/VIF1] [CIF1] [VIF1] [T2J15.13]	cell wall / vacuolar inhibitor of fructosidase 1				AT2G15890	CCG-binding protein 1 (AtCBP1) (Protein MATERNAL EFFECT EMBRYO ARREST 14) [MEE14] [CBP1]	maternal effect embryo arrest 14
AT1G72510		Protein of unknown function (DUF1677)	AT1G28100	Protein NEOXANTHIN-DEFICIENT 1 [NDX1] [F13K9.27]					AT5G42580	Cytochrome P450 705A12 (EC 1.14.-.-) [CYP705A12] [K16E1.5]	cytochrome P450, family 705, subfamily A, polypeptide 12	AT1G48660		Auxin-responsive GH3 family protein				AT2G20670		Protein of unknown function (DUF506)
AT1G73210		Protein of unknown function (DUF789)	AT1G29025		Calcium-binding EF-hand family protein				AT5G42590	Cytochrome P450 71A16 (EC 1.14.-.-) (Marneral oxidase) [CYP71A16] [MRNO] [MRO] [K16E1.6]	cytochrome P450, family 71, subfamily A, polypeptide 16	AT1G49230	RING-H2 finger protein ATL78 (EC 2.3.2.27) (RING-type E3 ubiquitin transferase ATL78) [ATL78] [F27J15.2]	RING/U-box superfamily protein				AT2G25160		cytochrome P450, family 82, subfamily F, polypeptide 1
AT1G74840		Homeodomain-like superfamily protein	AT1G29050	Protein trichome birefringence-like 38 [TBL38] [F28N24.24]	TRICHOME BIREFRINGENCE-LIKE 38				AT5G48000	Cytochrome P450 708A2 (EC 1.14.-.-) (Thalianol hydroxylase) (AtTHAH) [CYP708A2] [THAH] [MDN11.7]	cytochrome P450, family 708, subfamily A, polypeptide 2	AT1G49500						AT2G28570
AT1G74940	FCS-Like Zinc finger 13 [FLZ13] [DUF581-5] [F25A4.9] [F9E10.21]	Protein of unknown function (DUF581)	AT1G29400	Protein MEI2-like 5 (AML5) (MEI2-like protein 5) [ML5] [F15D2.30]	MEI2-like protein 5				AT5G48010	Thalianol synthase 1 (EC 5.4.99.31) (AtTHAS1) (Oxidosqualene cyclase) (Pentacyclic triterpene synthase 4) (AtPEN4) [THAS1] [OSC] [PEN4] [MDN11.9]	thalianol synthase 1	AT1G49620	Cyclin-dependent kinase inhibitor 7 (Inhibitor/interactor of CDK protein 5) (KIP-related protein 7) [KRP7] [ICK5] [F14J22.14]	Cyclin-dependent kinase inhibitor family protein				AT2G30070	Potassium transporter 1 (AtKT1) (AtKUP1) (AtPOT1) [POT1] [KT1] [KUP1] [F23F1.18] [T27E13.19]	potassium transporter 1
AT1G76210		Arabidopsis protein of unknown function (DUF241)	AT1G30040	Gibberellin 2-beta-dioxygenase 2 (EC 1.14.11.13) (GA 2-oxidase 2) (Gibberellin 2-beta-hydroxylase 2) (Gibberellin 2-oxidase 2) [GA2OX2] [T1P2.6]	gibberellin 2-oxidase				AT5G52110	Protein COFACTOR ASSEMBLY OF COMPLEX C SUBUNIT B CCB2, chloroplastic precursor (Protein HIGH CHLOROPHYLL FLUORESCENCE 208) [CCB2] [HCF208] [MSG15.21]	Protein of unknown function (DUF2930)	AT1G51805		Leucine-rich repeat protein kinase family protein				AT2G30230
AT1G77145		Protein of unknown function (DUF506)	AT1G30370		alpha/beta-Hydrolases superfamily protein				AT5G57390	AP2-like ethylene-responsive transcription factor AIL5 (Protein AINTEGUMENTA-LIKE 5) [AIL5] [MSF19.5]	AINTEGUMENTA-like 5	AT1G52270						AT2G31020	Oxysterol-binding protein-related protein 1A (OSBP-related protein 1A) [ORP1A] [F7F1.23]	OSBP(oxysterol binding protein)-related protein 1A
AT1G77530		O-methyltransferase family protein	AT1G31050	Transcription factor bHLH111 (Basic helix-loop-helix protein 111) (AtbHLH111) (bHLH 111) (Transcription factor EN 66) (bHLH transcription factor bHLH111) [BHLH111] [EN66] [F17F8.3]	basic helix-loop-helix (bHLH) DNA-binding superfamily protein				AT5G59660		Leucine-rich repeat protein kinase family protein	AT1G52700		alpha/beta-Hydrolases superfamily protein				AT2G32030		Acyl-CoA N-acyltransferases (NAT) superfamily protein
AT1G78815	Protein LIGHT-DEPENDENT SHORT HYPOCOTYLS 7 (Protein ORGAN BOUNDARY 7) [LSH7] [OBO7] [F9K20.14]	Protein of unknown function (DUF640)	AT1G31770	ABC transporter G family member 14 (ABC transporter ABCG.14) (AtABCG14) (Protein INSENSITIVE TO TEMPERATURE 211) (White-brown complex homolog protein 14) (AtWBC14) [ABCG14] [INT211] [WBC14] [F27M3.2] [F5M6.22]	ATP-binding cassette 14							AT1G55020	Linoleate 9S-lipoxygenase 1 (EC 1.13.11.58) (Lipoxygenase 1) (AtLOX1) [LOX1] [F14C21.3] [F14C21.54] [T24C10.13]	lipoxygenase 1				AT2G32200
AT2G01340			AT1G31820	Probable polyamine transporter At1g31820 [F5M6.17]	Amino acid permease family protein							AT1G56250	F-box protein VBF (Protein PHLOEM PROTEIN 2-LIKE B14) (AtPP2-B14) (VIP1-binding F-box protein) [VBF] [PP2B14] [F14G9.14]	phloem protein 2-B14				AT2G34610
AT2G03530	Ureide permease 2 (AtUPS2) [UPS2] [T4M8.3]	ureide permease 2	AT1G32090	CSC1-like protein At1g32090 [F3C3.11] [T12O21.1]	early-responsive to dehydration stress protein (ERD4)							AT1G57980	Probable purine permease 23 (AtPUP23) [PUP23] [F13D13.2] [T15M6]	Nucleotide-sugar transporter family protein				AT2G36050	Transcription repressor OFP15 (Ovate family protein 15) (AtOFP15) [OFP15] [F11F19.32]	ovate family protein 15
AT2G15890	CCG-binding protein 1 (AtCBP1) (Protein MATERNAL EFFECT EMBRYO ARREST 14) [MEE14] [CBP1]	maternal effect embryo arrest 14	AT1G33760	Ethylene-responsive transcription factor ERF022 [ERF022] [F14M2.12]	Integrase-type DNA-binding superfamily protein							AT1G61050		alpha 1,4-glycosyltransferase family protein				AT2G39705	Small polypeptide DEVIL 11 (Small polypeptide ROTUNDIFOLIA LIKE 8) (Small polypeptide ROT-FOUR-LIKE 8) [DVL11] [RTFL8] [F17A14.8]	ROTUNDIFOLIA like 8
AT2G20670		Protein of unknown function (DUF506)	AT1G44160		HSP40/DnaJ peptide-binding protein							AT1G64690	Protein BRANCHLESS TRICHOME [BLT] [F13O11.1] [F1N19.26]	branchless trichome				AT2G46890		Protein of unknown function (DUF1295)
AT2G23680	Cold-regulated 413 plasma membrane protein 3 (AtCOR413-PM3) [F26B6.33]	Cold acclimation protein WCOR413 family	AT1G44608									AT1G66020	Terpenoid synthase 26 (EC 4.2.3.-) (AtTPS26) [TPS26] [F15E12.3]	Terpenoid cyclases/Protein prenyltransferases superfamily protein				AT3G04060	NAC domain-containing protein 46 (ANAC046) [NAC046] [T11I18.17]	NAC domain containing protein 46
AT2G24140		Protein of unknown function, DUF593	AT1G45010		TRAM, LAG1 and CLN8 (TLC) lipid-sensing domain containing protein							AT1G66190						AT3G05770
AT2G24970			AT1G45201		triacylglycerol lipase-like 1							AT1G66230	Transcription factor MYB20 (Myb-related protein 20) (AtMYB20) [MYB20] [T6J19.5]	myb domain protein 20				AT3G09020		alpha 1,4-glycosyltransferase family protein
AT2G24980		Proline-rich extensin-like family protein	AT1G47610		Transducin/WD40 repeat-like superfamily protein							AT1G67750	Probable pectate lyase 5 precursor (EC 4.2.2.2) [F12A21.12]	Pectate lyase family protein				AT3G10960	Adenine/guanine permease AZG1 (AzgA-homolog protein) (Protein AZAGUANINE RESISTANT 1) (AtAzg1) [AZG1] [F9F8.22]	AZA-guanine resistant1
AT2G25160		cytochrome P450, family 82, subfamily F, polypeptide 1	AT1G47960	Cell wall / vacuolar inhibitor of fructosidase 1 precursor (AtC/VIF1) [C/VIF1] [CIF1] [VIF1] [T2J15.13]	cell wall / vacuolar inhibitor of fructosidase 1							AT1G68110	Putative clathrin assembly protein At1g68110 [T23K23.4]	ENTH/ANTH/VHS superfamily protein				AT3G12830	SAUR72	SAUR-like auxin-responsive protein family
AT2G28570			AT1G48260	CBL-interacting serine/threonine-protein kinase 17 (EC 2.7.11.1) (SNF1-related kinase 3.21) (SOS2-like protein kinase PKS20) [CIPK17] [PKS20] [SnRK3.21] [F11A17.18] [F21D18.2]	CBL-interacting protein kinase 17							AT1G68570	Protein NRT1/ PTR FAMILY 3.1 (AtNPF3.1) [NPF3.1] [NITR] [F24J5.19]	Major facilitator superfamily protein				AT3G18170		Glycosyltransferase family 61 protein
AT2G30070	Potassium transporter 1 (AtKT1) (AtKUP1) (AtPOT1) [POT1] [KT1] [KUP1] [F23F1.18] [T27E13.19]	potassium transporter 1	AT1G48660		Auxin-responsive GH3 family protein							AT1G69490	NAC transcription factor 29 (AtNAC029) (Protein NAC-LIKE, ACTIVATED BY AP3/PI) (AtNAP) [NAC029] [ANAC029] [NAC29] [NAP] [F10D13.14]	NAC-like, activated by AP3/PI				AT3G20015	Protein ASPARTIC PROTEASE IN GUARD CELL 2 precursor (EC 3.4.23.-) (AtASPG2) [ASPG2] [MZE19.7]	Eukaryotic aspartyl protease family protein
AT2G30230			AT1G49230	RING-H2 finger protein ATL78 (EC 2.3.2.27) (RING-type E3 ubiquitin transferase ATL78) [ATL78] [F27J15.2]	RING/U-box superfamily protein							AT1G71030		MYB-like 2				AT3G21710	Vascular-related unknown protein 1 [VUP1]
AT2G31020	Oxysterol-binding protein-related protein 1A (OSBP-related protein 1A) [ORP1A] [F7F1.23]	OSBP(oxysterol binding protein)-related protein 1A	AT1G49500									AT1G71880	Sucrose transport protein SUC1 (Sucrose permease 1) (Sucrose-proton symporter 1) [SUC1] [F17M19.3]	sucrose-proton symporter 1				AT3G26610		Pectin lyase-like superfamily protein
AT2G32030		Acyl-CoA N-acyltransferases (NAT) superfamily protein	AT1G49620	Cyclin-dependent kinase inhibitor 7 (Inhibitor/interactor of CDK protein 5) (KIP-related protein 7) [KRP7] [ICK5] [F14J22.14]	Cyclin-dependent kinase inhibitor family protein							AT1G72500						AT3G27650	LOB domain-containing protein 25 (ASYMMETRIC LEAVES 2-like protein 3) (AS2-like protein 3) [LBD25] [ASL3] [MGF10.6]	LOB domain-containing protein 25
AT2G32200			AT1G50040		Protein of unknown function (DUF1005)							AT1G72600		hydroxyproline-rich glycoprotein family protein				AT3G29035	NAC domain-containing protein 59 (ANAC059) (AtNAC3) (Protein ORE1 SISTER1) [NAC59] [NAC3] [ORS1] [MRI12.1]	NAC domain containing protein 3
AT2G34610			AT1G51805		Leucine-rich repeat protein kinase family protein							AT1G72940		Toll-Interleukin-Resistance (TIR) domain-containing protein				AT3G30180	Cytochrome P450 85A2 (EC 1.14.-.-) (Brassinosteroid-6-oxidase 2) (BR6ox 2) (C6-oxidase 2) [CYP85A2] [BR6OX2] [T20F20.9] [T20F20_6]	brassinosteroid-6-oxidase 2
AT2G36050	Transcription repressor OFP15 (Ovate family protein 15) (AtOFP15) [OFP15] [F11F19.32]	ovate family protein 15	AT1G52270									AT1G76890	Trihelix transcription factor GT-2 (Trihelix DNA-binding protein GT-2) [GT-2] [F7O12.6]	Duplicated homeodomain-like superfamily protein				AT3G30210		myb domain protein 121
AT2G39705	Small polypeptide DEVIL 11 (Small polypeptide ROTUNDIFOLIA LIKE 8) (Small polypeptide ROT-FOUR-LIKE 8) [DVL11] [RTFL8] [F17A14.8]	ROTUNDIFOLIA like 8	AT1G52342									AT1G77360	Pentatricopeptide repeat-containing protein At1g77360, mitochondrial precursor [F2P24.7]	Tetratricopeptide repeat (TPR)-like superfamily protein				AT3G44326	F-box protein At3g44326 [T22K7]	F-box family protein
AT2G46890		Protein of unknown function (DUF1295)	AT1G52700		alpha/beta-Hydrolases superfamily protein							AT1G77380	Amino acid permease 3 (Amino acid transporter AAP3) [AAP3] [F2P24.9]	amino acid permease 3				AT3G45700	Protein NRT1/ PTR FAMILY 2.4 (AtNPF2.4) (Probable nitrate excretion transporter 5) (Protein NAXT1-like 4) [NPF2.4] [T6D9.30]	Major facilitator superfamily protein
AT3G01175		Protein of unknown function (DUF1666)	AT1G55020	Linoleate 9S-lipoxygenase 1 (EC 1.13.11.58) (Lipoxygenase 1) (AtLOX1) [LOX1] [F14C21.3] [F14C21.54] [T24C10.13]	lipoxygenase 1							AT1G78460		SOUL heme-binding family protein				AT3G45710	Protein NRT1/ PTR FAMILY 2.5 (AtNPF2.5) (Probable nitrate excretion transporter 6) (Protein NAXT1-like 5) [NPF2.5] [T6D9.40]	Major facilitator superfamily protein
AT3G04060	NAC domain-containing protein 46 (ANAC046) [NAC046] [T11I18.17]	NAC domain containing protein 46	AT1G56010	NAC domain-containing protein 21/22 (ANAC021/ANAC022) [NAC021] [NAC022] [NAC1] [F14J16.32] [T6H22.19]	NAC domain containing protein 1							AT1G79060						AT3G46130	Transcription factor MYB48 (Myb-related protein 48) (AtMYB48) [MYB48] [F12M12.100]	myb domain protein 48
AT3G05770			AT1G56250	F-box protein VBF (Protein PHLOEM PROTEIN 2-LIKE B14) (AtPP2-B14) (VIP1-binding F-box protein) [VBF] [PP2B14] [F14G9.14]	phloem protein 2-B14							AT1G80920	Chaperone protein dnaJ 8, chloroplastic precursor (AtDjC8) (AtJ8) [ATJ8] [C8] [J8] [F23A5.28]	Chaperone DnaJ-domain superfamily protein				AT3G48920		myb domain protein 45
AT3G09020		alpha 1,4-glycosyltransferase family protein	AT1G57980	Probable purine permease 23 (AtPUP23) [PUP23] [F13D13.2] [T15M6]	Nucleotide-sugar transporter family protein							AT2G01300						AT3G50480	RPW8-like protein 4 (AtHR4) [HR4] [T20E23.80]	homolog of RPW8 4
AT3G10960	Adenine/guanine permease AZG1 (AzgA-homolog protein) (Protein AZAGUANINE RESISTANT 1) (AtAzg1) [AZG1] [F9F8.22]	AZA-guanine resistant1	AT1G59940	Two-component response regulator ARR3 [ARR3] [F23H11.25]	response regulator 3							AT2G01660	Plasmodesmata-located protein 6 precursor (PD-located protein 6) (Cysteine-rich repeat secretory protein 12) [PDLP6] [CRRSP12] [T8O11.17]	plasmodesmata-located protein 6				AT3G50840	BTB/POZ domain-containing protein At3g50840 [F18B3_120]	Phototropic-responsive NPH3 family protein
AT3G12830	SAUR72	SAUR-like auxin-responsive protein family	AT1G61050		alpha 1,4-glycosyltransferase family protein							AT2G01890	Purple acid phosphatase 8 precursor (EC 3.1.3.2) [PAP8] [T23K3.8]	purple acid phosphatase 8				AT3G51400		Arabidopsis protein of unknown function (DUF241)
AT3G13730	3-epi-6-deoxocathasterone 23-monooxygenase CYP90D1 (EC 1.14.14.147) (Cytochrome P450 90D1) [CYP90D1] [MMM17.15]	cytochrome P450, family 90, subfamily D, polypeptide 1	AT1G62280	S-type anion channel SLAH1 (SLAC1-homolog protein 1) [SLAH1] [F19K23.20]	SLAC1 homologue 1							AT2G01900	Type IV inositol polyphosphate 5-phosphatase 9 (EC 3.1.3.36) (EC 3.1.3.86) (At5PTase9) [IP5P9] [T23K3.9]	DNAse I-like superfamily protein				AT3G52480
AT3G18170		Glycosyltransferase family 61 protein	AT1G64590		NAD(P)-binding Rossmann-fold superfamily protein							AT2G01950	Serine/threonine-protein kinase BRI1-like 2 precursor (EC 2.7.11.1) (BRASSINOSTEROID INSENSITIVE 1-like protein 2) (Protein VASCULAR HIGHWAY 1) [BRL2] [VH1] [F14H20.2]	BRI1-like 2				AT3G53960	Protein NRT1/ PTR FAMILY 5.7 (AtNPF5.7) [NPF5.7] [F5K20.260]	Major facilitator superfamily protein
AT3G20015	Protein ASPARTIC PROTEASE IN GUARD CELL 2 precursor (EC 3.4.23.-) (AtASPG2) [ASPG2] [MZE19.7]	Eukaryotic aspartyl protease family protein	AT1G64690	Protein BRANCHLESS TRICHOME [BLT] [F13O11.1] [F1N19.26]	branchless trichome							AT2G02010	Glutamate decarboxylase 4 (EC 4.1.1.15) (GAD 4) [GAD4] [F14H20.8]	glutamate decarboxylase 4				AT3G54150		S-adenosyl-L-methionine-dependent methyltransferases superfamily protein
AT3G21710	Vascular-related unknown protein 1 [VUP1]		AT1G66020	Terpenoid synthase 26 (EC 4.2.3.-) (AtTPS26) [TPS26] [F15E12.3]	Terpenoid cyclases/Protein prenyltransferases superfamily protein							AT2G03370		Glycosyltransferase family 61 protein				AT3G54820	Probable aquaporin PIP2-5 (Plasma membrane intrinsic protein 2-5) (AtPIP2;5) (Plasma membrane intrinsic protein 2d) (PIP2d) [PIP2-5] [PIP2D] [F28P10.200]	plasma membrane intrinsic protein 2;5
AT3G22910	Putative calcium-transporting ATPase 13, plasma membrane-type (EC 7.2.2.10) (Ca(2+)-ATPase isoform 13) [ACA13] [F5N5.8]	ATPase E1-E2 type family protein / haloacid dehalogenase-like hydrolase family protein	AT1G66190									AT2G05910	Protein LURP-one-related 6 [T6P5.11]	Protein of unknown function (DUF567)				AT3G55515	Small polypeptide DEVIL 8 (Small polypeptide ROTUNDIFOLIA LIKE 7) (Small polypeptide ROT-FOUR-LIKE 7) [DVL8] [RTFL7] [T22E16]	ROTUNDIFOLIA like 7
AT3G26610		Pectin lyase-like superfamily protein	AT1G66230	Transcription factor MYB20 (Myb-related protein 20) (AtMYB20) [MYB20] [T6J19.5]	myb domain protein 20							AT2G07798						AT3G60690	SAUR59	SAUR-like auxin-responsive protein family
AT3G27650	LOB domain-containing protein 25 (ASYMMETRIC LEAVES 2-like protein 3) (AS2-like protein 3) [LBD25] [ASL3] [MGF10.6]	LOB domain-containing protein 25	AT1G66800		NAD(P)-binding Rossmann-fold superfamily protein							AT2G14060		S-adenosyl-L-methionine-dependent methyltransferases superfamily protein				AT3G61060	F-box protein PP2-A13 (Protein PHLOEM PROTEIN 2-LIKE A13) (AtPP2-A13) (SKP1-interacting partner 9) [PP2A13] [SKIP9] [T27I15.150]	phloem protein 2-A13
AT3G28315		transposable element gene	AT1G67030	Zinc finger protein 6 [ZFP6] [ZEP6] [F1O19.8] [F1O19_5]	zinc finger protein 6							AT2G15390	Probable fucosyltransferase 4 (EC 2.4.1.-) (AtFUT4) [FUT4] [F26H6.9]	fucosyltransferase 4				AT3G63210	Protein MARD1 (FCS-Like Zinc finger 9) (Mediator of ABA-regulated dormancy1) (Senescence-associated protein SAG102) [MARD1] [DUF581-19] [FLZ9] [SAG102] [F16M2.6]	Protein of unknown function (DUF581)
AT3G29035	NAC domain-containing protein 59 (ANAC059) (AtNAC3) (Protein ORE1 SISTER1) [NAC59] [NAC3] [ORS1] [MRI12.1]	NAC domain containing protein 3	AT1G67070	Mannose-6-phosphate isomerase 2 (EC 5.3.1.8) (Phosphohexomutase 2) (Phosphomannose isomerase 2) (PMI2) (Protein DARK INDUCIBLE 9) [PMI2] [DIN9] [F1O19.12]	Mannose-6-phosphate isomerase, type I							AT2G15960						AT4G00210	LOB domain-containing protein 31 (ASYMMETRIC LEAVES 2-like protein 22) (AS2-like protein 22) [LBD31] [ASL22] [F6N15.25]	LOB domain-containing protein 31
AT3G30180	Cytochrome P450 85A2 (EC 1.14.-.-) (Brassinosteroid-6-oxidase 2) (BR6ox 2) (C6-oxidase 2) [CYP85A2] [BR6OX2] [T20F20.9] [T20F20_6]	brassinosteroid-6-oxidase 2	AT1G67110	Cytokinin hydroxylase (EC 1.14.13.-) (Cytochrome P450 35A2) [CYP735A2] [F5A8.3]	cytochrome P450, family 735, subfamily A, polypeptide 2							AT2G16980		Major facilitator superfamily protein				AT4G00910	Aluminum-activated malate transporter 10 (AtALMT10) [ALMT10] [A_TM018A10.3] [T18A10.21]	Aluminium activated malate transporter family protein
AT3G30210		myb domain protein 121	AT1G67750	Probable pectate lyase 5 precursor (EC 4.2.2.2) [F12A21.12]	Pectate lyase family protein							AT2G17820	Histidine kinase 1 (EC 2.7.13.3) (Arabidopsis histidine kinase 1) (AtHK1) (Protein AUTHENTIC HIS-KINASE 1) [AHK1] [T13L16.16] [T17A5]	histidine kinase 1				AT4G01450	WAT1-related protein At4g01450 [F11O4.14]	nodulin MtN21 /EamA-like transporter family protein
AT3G44326	F-box protein At3g44326 [T22K7]	F-box family protein	AT1G68110	Putative clathrin assembly protein At1g68110 [T23K23.4]	ENTH/ANTH/VHS superfamily protein							AT2G18550	Homeobox-leucine zipper protein ATHB-21 (HD-ZIP protein ATHB-21) (Homeodomain transcription factor ATHB-21) [ATHB-21] [F24H14.10]	homeobox protein 21				AT4G03510	E3 ubiquitin-protein ligase RMA1 (EC 2.3.2.27) (Protein RING membrane-anchor 1) (RING-type E3 ubiquitin transferase RMA1) [RMA1] [F9H3.14]	RING membrane-anchor 1
AT3G45700	Protein NRT1/ PTR FAMILY 2.4 (AtNPF2.4) (Probable nitrate excretion transporter 5) (Protein NAXT1-like 4) [NPF2.4] [T6D9.30]	Major facilitator superfamily protein	AT1G68570	Protein NRT1/ PTR FAMILY 3.1 (AtNPF3.1) [NPF3.1] [NITR] [F24J5.19]	Major facilitator superfamily protein							AT2G18560		UDP-Glycosyltransferase superfamily protein				AT4G05070		Wound-responsive family protein
AT3G45710	Protein NRT1/ PTR FAMILY 2.5 (AtNPF2.5) (Probable nitrate excretion transporter 6) (Protein NAXT1-like 5) [NPF2.5] [T6D9.40]	Major facilitator superfamily protein	AT1G69080		Adenine nucleotide alpha hydrolases-like superfamily protein							AT2G18570	UDP-glycosyltransferase 72D1 (EC 2.4.1.-) [UGT72D1] [F24H14.8]	UDP-Glycosyltransferase superfamily protein				AT4G13260	Indole-3-pyruvate monooxygenase YUCCA2 (EC 1.14.13.168) (Flavin-containing monooxygenase YUCCA2) [YUC2] [YUCCA2] [F17N18.150]	Flavin-binding monooxygenase family protein
AT3G46130	Transcription factor MYB48 (Myb-related protein 48) (AtMYB48) [MYB48] [F12M12.100]	myb domain protein 48	AT1G69490	NAC transcription factor 29 (AtNAC029) (Protein NAC-LIKE, ACTIVATED BY AP3/PI) (AtNAP) [NAC029] [ANAC029] [NAC29] [NAP] [F10D13.14]	NAC-like, activated by AP3/PI							AT2G18620	Geranylgeranyl pyrophosphate synthase 7, chloroplastic precursor (EC 2.5.1.-) (GGPP synthase 7) (GGPS7) ((2E,6E)-farnesyl diphosphate synthase 7) (Dimethylallyltranstransferase 7) (EC 2.5.1.1) (Farnesyl diphosphate synthase 7) (Farnesyltranstransferase 7) (EC 2.5.1.29) (Geranyltranstransferase 7) (EC 2.5.1.10) [F24H14.3]	Terpenoid synthases superfamily protein				AT4G14930		Survival protein SurE-like phosphatase/nucleotidase
AT3G46700	UDP-glycosyltransferase 76E3 (EC 2.4.1.-) [UGT76E3] [T6H20.270]	UDP-Glycosyltransferase superfamily protein	AT1G71030		MYB-like 2							AT2G18890		Protein kinase superfamily protein				AT4G16563	Probable aspartyl protease At4g16563 precursor (EC 3.4.23.-) [dl4305c]	Eukaryotic aspartyl protease family protein
AT3G48920		myb domain protein 45	AT1G71880	Sucrose transport protein SUC1 (Sucrose permease 1) (Sucrose-proton symporter 1) [SUC1] [F17M19.3]	sucrose-proton symporter 1							AT2G19190	Senescence-induced receptor-like serine/threonine-protein kinase precursor (FLG22-induced receptor-like kinase 1) [SIRK] [FRK1] [T20K24.21]	FLG22-induced receptor-like kinase 1				AT4G18610	Protein LIGHT-DEPENDENT SHORT HYPOCOTYLS 9 (Protein ORGAN BOUNDARY 9) [LSH9] [OBO9] [F28A21.20]	Protein of unknown function (DUF640)
AT3G49960	Peroxidase 35 precursor (EC 1.11.1.7) (Atperox P35) (ATP21a) [PER35] [P35] [F3A4.40]	Peroxidase superfamily protein	AT1G72500									AT2G20180	Transcription factor PIF1 (Basic helix-loop-helix protein 15) (AtbHLH15) (bHLH 15) (Protein PHY-INTERACTING FACTOR 1) (Protein PHYTOCHROME INTERACTING FACTOR 3-LIKE 5) (Transcription factor EN 101) (bHLH transcription factor bHLH015) [PIF1] [BHLH15] [EN101] [PIL5] [T2G17.2]	phytochrome interacting factor 3-like 5				AT4G19420	Pectin acetylesterase 8 precursor (EC 3.1.1.-) [PAE8]	Pectinacetylesterase family protein
AT3G50480	RPW8-like protein 4 (AtHR4) [HR4] [T20E23.80]	homolog of RPW8 4	AT1G72510		Protein of unknown function (DUF1677)							AT2G21560						AT4G20820	Berberine bridge enzyme-like 18 precursor (EC 1.1.1.-) (AtBBE-like 18) [F21C20.170]	FAD-binding Berberine family protein
AT3G50810	CASP-like protein 5C2 (AtCASPL5C2) [F18B3.90]	Uncharacterised protein family (UPF0497)	AT1G72600		hydroxyproline-rich glycoprotein family protein							AT2G22540	MADS-box protein SVP (Protein SHORT VEGETATIVE PHASE) [SVP] [F14M13.6]	K-box region and MADS-box transcription factor family protein				AT4G22690		cytochrome P450, family 706, subfamily A, polypeptide 1
AT3G50840	BTB/POZ domain-containing protein At3g50840 [F18B3_120]	Phototropic-responsive NPH3 family protein	AT1G72940		Toll-Interleukin-Resistance (TIR) domain-containing protein							AT2G22850		basic leucine-zipper 6				AT4G23700	Cation/H(+) antiporter 17 (Protein CATION/H+ EXCHANGER 17) (AtCHX17) [CHX17] [F9D16.170]	cation/H+ exchanger 17
AT3G51400		Arabidopsis protein of unknown function (DUF241)	AT1G73210		Protein of unknown function (DUF789)							AT2G23300		Leucine-rich repeat protein kinase family protein				AT4G24050		NAD(P)-binding Rossmann-fold superfamily protein
AT3G52480			AT1G74840		Homeodomain-like superfamily protein							AT2G23340	Ethylene-responsive transcription factor ERF008 [ERF008] [T20D16.3]	DREB and EAR motif protein 3				AT4G26120	Regulatory protein NPR2 (BTB/POZ domain-containing protein NPR2) [NPR2] [F20B18.230]	Ankyrin repeat family protein / BTB/POZ domain-containing protein
AT3G53960	Protein NRT1/ PTR FAMILY 5.7 (AtNPF5.7) [NPF5.7] [F5K20.260]	Major facilitator superfamily protein	AT1G74940	FCS-Like Zinc finger 13 [FLZ13] [DUF581-5] [F25A4.9] [F9E10.21]	Protein of unknown function (DUF581)							AT2G24160						AT4G28530		NAC domain containing protein 74
AT3G54150		S-adenosyl-L-methionine-dependent methyltransferases superfamily protein	AT1G76210		Arabidopsis protein of unknown function (DUF241)							AT2G24580	Probable sarcosine oxidase (EC 1.5.3.1) [F25P17.12]	FAD-dependent oxidoreductase family protein				AT4G36380	3-epi-6-deoxocathasterone 23-monooxygenase CYP90C1 (EC 1.14.14.147) (Cytochrome P450 90C1) (Protein ROTUNDIFOLIA 3) [CYP90C1] [ROT3] [AP22.10] [C7A10.980] [F23E13.220]	Cytochrome P450 superfamily protein
AT3G54590	Extensin-2 precursor (AtExt2) (Cell wall hydroxyproline-rich glycoprotein 1) (HRGP1) [EXT2] [HRGP1] [T14E10.160]	hydroxyproline-rich glycoprotein	AT1G76890	Trihelix transcription factor GT-2 (Trihelix DNA-binding protein GT-2) [GT-2] [F7O12.6]	Duplicated homeodomain-like superfamily protein							AT2G25900	Zinc finger CCCH domain-containing protein 23 (AtC3H23) (Protein ATCTH) [F17H15.7]	Zinc finger C-x8-C-x5-C-x3-H type family protein				AT4G37240
AT3G54820	Probable aquaporin PIP2-5 (Plasma membrane intrinsic protein 2-5) (AtPIP2;5) (Plasma membrane intrinsic protein 2d) (PIP2d) [PIP2-5] [PIP2D] [F28P10.200]	plasma membrane intrinsic protein 2;5	AT1G77360	Pentatricopeptide repeat-containing protein At1g77360, mitochondrial precursor [F2P24.7]	Tetratricopeptide repeat (TPR)-like superfamily protein							AT2G29670		Tetratricopeptide repeat (TPR)-like superfamily protein				AT4G38060
AT3G55515	Small polypeptide DEVIL 8 (Small polypeptide ROTUNDIFOLIA LIKE 7) (Small polypeptide ROT-FOUR-LIKE 7) [DVL8] [RTFL7] [T22E16]	ROTUNDIFOLIA like 7	AT1G77380	Amino acid permease 3 (Amino acid transporter AAP3) [AAP3] [F2P24.9]	amino acid permease 3							AT2G29750	Flavonol 3-O-glucosyltransferase UGT71C1 (EC 2.4.1.91) (Flavonol 7-O-beta-glucosyltransferase UGT71C1) (EC 2.4.1.237) (UDP-glycosyltransferase 71C1) [UGT71C1] [T27A16.15]	UDP-glucosyl transferase 71C1				AT4G39010	Endoglucanase 24 precursor (EC 3.2.1.4) (Endo-1,4-beta glucanase 24) [F19H22.110]	glycosyl hydrolase 9B18
AT3G56400	Probable WRKY transcription factor 70 (WRKY DNA-binding protein 70) [WRKY70] [T5P19.50]	WRKY DNA-binding protein 70	AT1G77530		O-methyltransferase family protein							AT2G30520	Root phototropism protein 2 (BTB/POZ domain-containing protein RPT2) [RPT2] [At2g30520/At2g30510] [T6B20.13/T6B20.14]	Phototropic-responsive NPH3 family protein				AT4G39770	Probable trehalose-phosphate phosphatase H (EC 3.1.3.12) (AtTPPH) (Trehalose 6-phosphate phosphatase) [TPPH] [T19P19.160]	Haloacid dehalogenase-like hydrolase (HAD) superfamily protein
AT3G57157		other RNA	AT1G78460		SOUL heme-binding family protein							AT2G31730	Transcription factor bHLH154 (BHLH transcription factor beta) (bHLH beta) (Basic helix-loop-helix protein 154) (AtbHLH154) (bHLH 154) (bHLH transcription factor bHLH154)[BHLH154] [F20M17.23] [T9H9.27]	basic helix-loop-helix (bHLH) DNA-binding superfamily protein				AT4G39795	FCS-Like Zinc finger 7 [FLZ7] [DUF581-13] [T19P19] [T5J17]	Protein of unknown function (DUF581)
AT3G60690	SAUR59	SAUR-like auxin-responsive protein family	AT1G79060									AT2G32390	Glutamate receptor 3.5 precursor (Ionotropic glutamate receptor GLR6) (Ligand-gated ion channel 3.5) [GLR3.5] [GLR6] [T32F6.9]	glutamate receptor 3.5				AT5G01520	E3 ubiquitin-protein ligase AIRP2 (EC 2.3.2.27) (Protein ABA INSENSITIVE RING PROTEIN 2) (AtAIRP2) (RING-type E3 ubiquitin transferase AIRP2) [AIRP2] [F7A7_40]	RING/U-box superfamily protein
AT3G61060	F-box protein PP2-A13 (Protein PHLOEM PROTEIN 2-LIKE A13) (AtPP2-A13) (SKP1-interacting partner 9) [PP2A13] [SKIP9] [T27I15.150]	phloem protein 2-A13	AT1G80920	Chaperone protein dnaJ 8, chloroplastic precursor (AtDjC8) (AtJ8) [ATJ8] [C8] [J8] [F23A5.28]	Chaperone DnaJ-domain superfamily protein							AT2G32970						AT5G02230		Haloacid dehalogenase-like hydrolase (HAD) superfamily protein
AT3G62680	Proline-rich protein 3 precursor (AtPRP3) [PRP3] [F26K9.110]	proline-rich protein 3	AT2G01300									AT2G33830	Dormancy-associated protein homolog 1 (Auxin-repressed protein 1) (AtARP1) (DRM1 homolog 1) (Dormancy-associated protein 2) (AtDRM2) [DRMH1] [ARP1] [DRM2] [T1B8.13]	Dormancy/auxin associated family protein				AT5G03380	Heavy metal-associated isoprenylated plant protein 6 precursor (AtHIP06) (Cadmium induced protein CdI19) [HIPP06] [CDI19] [F12E4_120]	Heavy metal transport/detoxification superfamily protein
AT3G63210	Protein MARD1 (FCS-Like Zinc finger 9) (Mediator of ABA-regulated dormancy1) (Senescence-associated protein SAG102) [MARD1] [DUF581-19] [FLZ9] [SAG102] [F16M2.6]	Protein of unknown function (DUF581)	AT2G01340									AT2G33990	Protein IQ-DOMAIN 9 (AtIQD9) [IQD9] [T14G11.11]	IQ-domain 9				AT5G03995
AT4G00210	LOB domain-containing protein 31 (ASYMMETRIC LEAVES 2-like protein 22) (AS2-like protein 22) [LBD31] [ASL22] [F6N15.25]	LOB domain-containing protein 31	AT2G01660	Plasmodesmata-located protein 6 precursor (PD-located protein 6) (Cysteine-rich repeat secretory protein 12) [PDLP6] [CRRSP12] [T8O11.17]	plasmodesmata-located protein 6							AT2G34010	Protein SPEAR2 (SPL-like, EAR-containing protein 2) (TCP interactor containing EAR motif protein 4) [SPEAR2] [TIE4] [T14G11.13]					AT5G04330	Cytochrome P450 84A4 (EC 1.14.-.-) [CYP84A4] [T19N18.60]	Cytochrome P450 superfamily protein
AT4G00910	Aluminum-activated malate transporter 10 (AtALMT10) [ALMT10] [A_TM018A10.3] [T18A10.21]	Aluminium activated malate transporter family protein	AT2G01890	Purple acid phosphatase 8 precursor (EC 3.1.3.2) [PAP8] [T23K3.8]	purple acid phosphatase 8							AT2G35470						AT5G06570	Probable carboxylesterase 15 (AtCXE15) (EC 3.1.1.1) [CXE15] [F15M7.10]	alpha/beta-Hydrolases superfamily protein
AT4G01450	WAT1-related protein At4g01450 [F11O4.14]	nodulin MtN21 /EamA-like transporter family protein	AT2G01900	Type IV inositol polyphosphate 5-phosphatase 9 (EC 3.1.3.36) (EC 3.1.3.86) (At5PTase9) [IP5P9] [T23K3.9]	DNAse I-like superfamily protein							AT2G36950	Heavy metal-associated isoprenylated plant protein 5 precursor (AtHIP05) (Farnesylated protein 2) (AtFP2) [HIPP05] [FP2] [T1J8.13]	Heavy metal transport/detoxification superfamily protein				AT5G06670	Kinesin-like protein KIN-7L, chloroplastic precursor [KIN7L] [F15M7.20]	P-loop containing nucleoside triphosphate hydrolases superfamily protein
AT4G03510	E3 ubiquitin-protein ligase RMA1 (EC 2.3.2.27) (Protein RING membrane-anchor 1) (RING-type E3 ubiquitin transferase RMA1) [RMA1] [F9H3.14]	RING membrane-anchor 1	AT2G01950	Serine/threonine-protein kinase BRI1-like 2 precursor (EC 2.7.11.1) (BRASSINOSTEROID INSENSITIVE 1-like protein 2) (Protein VASCULAR HIGHWAY 1) [BRL2] [VH1] [F14H20.2]	BRI1-like 2							AT2G37430	Zinc finger protein ZAT11 [ZAT11] [F3G5.22]	C2H2 and C2HC zinc fingers superfamily protein				AT5G18130
AT4G05070		Wound-responsive family protein	AT2G02010	Glutamate decarboxylase 4 (EC 4.1.1.15) (GAD 4) [GAD4] [F14H20.8]	glutamate decarboxylase 4							AT2G38170	Vacuolar cation/proton exchanger 1 (Ca(2+)/H(+) antiporter CAX1) (Ca(2+)/H(+) exchanger 1) (Protein CATION EXCHANGER 1) (Protein RARE COLD INDUCIBLE 4) [CAX1] [RCI4] [F16M14.10]	cation exchanger 1				AT5G25240
AT4G13260	Indole-3-pyruvate monooxygenase YUCCA2 (EC 1.14.13.168) (Flavin-containing monooxygenase YUCCA2) [YUC2] [YUCCA2] [F17N18.150]	Flavin-binding monooxygenase family protein	AT2G02950	Protein PHYTOCHROME KINASE SUBSTRATE 1 [PKS1] [T17M13.12]	phytochrome kinase substrate 1							AT2G39250	AP2-like ethylene-responsive transcription factor SNZ (Protein SCHNARCHZAPFEN) [SNZ] [T16B24.11]	Integrase-type DNA-binding superfamily protein				AT5G25890	Auxin-responsive protein IAA28 (Indoleacetic acid-induced protein 28) [IAA28] [F18A17.6] [T1N24.24]	indole-3-acetic acid inducible 28
AT4G14930		Survival protein SurE-like phosphatase/nucleotidase	AT2G03370		Glycosyltransferase family 61 protein							AT2G40200	Transcription factor bHLH51 (Basic helix-loop-helix protein 51) (AtbHLH51) (bHLH 51) (Transcription factor EN 57) (bHLH transcription factor bHLH051) [BHLH51] [EN57] [T7M7.8]	basic helix-loop-helix (bHLH) DNA-binding superfamily protein				AT5G36180	Serine carboxypeptidase-like 1 precursor (EC 3.4.16.-) [SCPL1] [MAB16.13]	serine carboxypeptidase-like 1
AT4G16563	Probable aspartyl protease At4g16563 precursor (EC 3.4.23.-) [dl4305c]	Eukaryotic aspartyl protease family protein	AT2G05910	Protein LURP-one-related 6 [T6P5.11]	Protein of unknown function (DUF567)							AT2G40460	Protein NRT1/ PTR FAMILY 5.1 (AtNPF5.1) [NPF5.1] [T2P4.19]	Major facilitator superfamily protein				AT5G42690		Protein of unknown function, DUF547
AT4G18610	Protein LIGHT-DEPENDENT SHORT HYPOCOTYLS 9 (Protein ORGAN BOUNDARY 9) [LSH9] [OBO9] [F28A21.20]	Protein of unknown function (DUF640)	AT2G07798									AT2G41810		Protein of unknown function, DUF642				AT5G43890	Probable indole-3-pyruvate monooxygenase YUCCA5 (EC 1.14.13.168) (Flavin-containing monooxygenase YUCCA5) (Protein SUPPRESSOR OF ER 1) [YUC5] [SUPER1] [YUCCA5] [F6B6.3]	Flavin-binding monooxygenase family protein
AT4G19420	Pectin acetylesterase 8 precursor (EC 3.1.1.-) [PAE8]	Pectinacetylesterase family protein	AT2G14060		S-adenosyl-L-methionine-dependent methyltransferases superfamily protein							AT2G42990	GDSL esterase/lipase At2g42990 precursor (EC 3.1.1.-) (Extracellular lipase At2g42990) [F23E6.2]	GDSL-like Lipase/Acylhydrolase superfamily protein				AT5G44820		Nucleotide-diphospho-sugar transferase family protein
AT4G20820	Berberine bridge enzyme-like 18 precursor (EC 1.1.1.-) (AtBBE-like 18) [F21C20.170]	FAD-binding Berberine family protein	AT2G15390	Probable fucosyltransferase 4 (EC 2.4.1.-) (AtFUT4) [FUT4] [F26H6.9]	fucosyltransferase 4							AT2G43560	Peptidyl-prolyl cis-trans isomerase FKBP16-3, chloroplastic precursor (EC 5.2.1.8) (PPIase FKBP16-3) (FK506-binding protein 16-3) (AtFKBP16-3) (Immunophilin FKBP16-3) (Rotamase) [FKBP16-3] [FKBP17] [T1O24.30]	FKBP-like peptidyl-prolyl cis-trans isomerase family protein				AT5G45650	Subtilisin-like protease SBT5.6 precursor (EC 3.4.21.-) (Subtilase subfamily 5 member 6) (AtSBT5.6) [SBT5.6] [MRA19.5]	subtilase family protein
AT4G22080	Probable pectate lyase 16 precursor (EC 4.2.2.2) [F1N20.180]	root hair specific 14	AT2G15890	CCG-binding protein 1 (AtCBP1) (Protein MATERNAL EFFECT EMBRYO ARREST 14) [MEE14] [CBP1]	maternal effect embryo arrest 14							AT2G47240	Long chain acyl-CoA synthetase 1 (EC 6.2.1.3) (Protein ECERIFERUM 8) [LACS1] [CER8] [T8I13.8]	AMP-dependent synthetase and ligase family protein				AT5G46060		Protein of unknown function, DUF599
AT4G22690		cytochrome P450, family 706, subfamily A, polypeptide 1	AT2G15960									AT2G47550	Probable pectinesterase/pectinesterase inhibitor 20 precursor [Includes: Pectinesterase inhibitor 20 (Pectin methylesterase inhibitor 20); Pectinesterase 20 (EC 3.1.1.11) (PE 20) (Pectin methylesterase 20) (AtPME20)] [PME20] [ARATH20] [T30B22.15]	Plant invertase/pectin methylesterase inhibitor superfamily				AT5G47980	BAHD acyltransferase At5g47980 (EC 2.3.1.-) [BAHD1] [MDN11.1]	HXXXD-type acyl-transferase family protein
AT4G23700	Cation/H(+) antiporter 17 (Protein CATION/H+ EXCHANGER 17) (AtCHX17) [CHX17] [F9D16.170]	cation/H+ exchanger 17	AT2G16980		Major facilitator superfamily protein							AT2G48080		oxidoreductase, 2OG-Fe(II) oxygenase family protein				AT5G47990	Cytochrome P450 705A5 (EC 1.14.-.-) (Thalian-diol desaturase) (AtTHAD) [CYP705A5] [THAD] [MDN11.4]	cytochrome P450, family 705, subfamily A, polypeptide 5
AT4G24050		NAD(P)-binding Rossmann-fold superfamily protein	AT2G17820	Histidine kinase 1 (EC 2.7.13.3) (Arabidopsis histidine kinase 1) (AtHK1) (Protein AUTHENTIC HIS-KINASE 1) [AHK1] [T13L16.16] [T17A5]	histidine kinase 1							AT3G01750		Ankyrin repeat family protein				AT5G48560	Transcription factor bHLH78 (Basic helix-loop-helix protein 78) (AtbHLH78) (bHLH 78) (Transcription factor EN 86) (bHLH transcription factor bHLH078) [BHLH78] [CIB2] [EN86] [K15N18.2]	basic helix-loop-helix (bHLH) DNA-binding superfamily protein
AT4G26010	Peroxidase 44 precursor (EC 1.11.1.7) (Atperox P44) (ATP35) [PER44] [P44] [F20B18.120]	Peroxidase superfamily protein	AT2G18550	Homeobox-leucine zipper protein ATHB-21 (HD-ZIP protein ATHB-21) (Homeodomain transcription factor ATHB-21) [ATHB-21] [F24H14.10]	homeobox protein 21							AT3G05390						AT5G49080		transposable element gene
AT4G26120	Regulatory protein NPR2 (BTB/POZ domain-containing protein NPR2) [NPR2] [F20B18.230]	Ankyrin repeat family protein / BTB/POZ domain-containing protein	AT2G18560		UDP-Glycosyltransferase superfamily protein							AT3G05640	Probable protein phosphatase 2C 34 (EC 3.1.3.16) (AtPP2C34) [F18C1.9]	Protein phosphatase 2C family protein				AT5G52120	F-box protein PP2-A14 (Protein PHLOEM PROTEIN 2-LIKE A14) (AtPP2-A14) (SKP1-interacting partner 13) [PP2A14] [SKIP13] [MSG15.23]	phloem protein 2-A14
AT4G28530		NAC domain containing protein 74	AT2G18570	UDP-glycosyltransferase 72D1 (EC 2.4.1.-) [UGT72D1] [F24H14.8]	UDP-Glycosyltransferase superfamily protein							AT3G05800	Transcription factor bHLH150 (ATBS1 interacting factor 1) (Basic helix-loop-helix protein 150) (AtbHLH150) (bHLH 150) (Transcription factor EN 145) (bHLH transcription factor bHLH150) [BHLH150] [AIF1] [EN145] [F10A16.9]	AtBS1(activation-tagged BRI1 suppressor 1)-interacting factor 1				AT5G57510
AT4G34540	Probable pinoresinol-lariciresinol reductase 3 (EC 1.23.1.-) (AtPLR3) (lariciresinol reductase) [PLR3] [T4L20.120]	NmrA-like negative transcriptional regulator family protein	AT2G18620	Geranylgeranyl pyrophosphate synthase 7, chloroplastic precursor (EC 2.5.1.-) (GGPP synthase 7) (GGPS7) ((2E,6E)-farnesyl diphosphate synthase 7) (Dimethylallyltranstransferase 7) (EC 2.5.1.1) (Farnesyl diphosphate synthase 7) (Farnesyltranstransferase 7) (EC 2.5.1.29) (Geranyltranstransferase 7) (EC 2.5.1.10) [F24H14.3]	Terpenoid synthases superfamily protein							AT3G07310		Protein of unknown function (DUF760)				AT5G58500	Protein LIGHT-DEPENDENT SHORT HYPOCOTYLS 5 (Protein ORGAN BOUNDARY 5) [LSH5] [OBO5] [MQJ2.11]	Protein of unknown function (DUF640)
AT4G36380	3-epi-6-deoxocathasterone 23-monooxygenase CYP90C1 (EC 1.14.14.147) (Cytochrome P450 90C1) (Protein ROTUNDIFOLIA 3) [CYP90C1] [ROT3] [AP22.10] [C7A10.980] [F23E13.220]	Cytochrome P450 superfamily protein	AT2G18890		Protein kinase superfamily protein							AT3G08490						AT5G61340
AT4G36830	Elongation of fatty acids protein 3-like (EC 2.3.1.-) (Protein ELO3-like) (Protein HIGH EXPRESSION OF OSMOTICALLY RESPONSIVE GENES 3) (Very long-chain fatty acid condensing enzyme HOS3) (VLCFA condensing enzyme HOS3) [HOS3] [AP22.81] [C7A10.530]	GNS1/SUR4 membrane protein family	AT2G19190	Senescence-induced receptor-like serine/threonine-protein kinase precursor (FLG22-induced receptor-like kinase 1) [SIRK] [FRK1] [T20K24.21]	FLG22-induced receptor-like kinase 1							AT3G09040	Pentatricopeptide repeat-containing protein At3g09040, mitochondrial precursor [PCMP-E88] [MZB10.7]	Pentatricopeptide repeat (PPR) superfamily protein				AT5G61420	Transcription factor MYB28 (Myb-related protein 28) (AtMYB28) (Protein HIGH ALIPHATIC GLUCOSINOLATE 1) (Protein PRODUCTION OF METHIONINE-DERIVED GLUCOSINOLATE 1) [MYB28][HAG1] [PMG1] [MFB13.22]	myb domain protein 28
AT4G37240			AT2G20180	Transcription factor PIF1 (Basic helix-loop-helix protein 15) (AtbHLH15) (bHLH 15) (Protein PHY-INTERACTING FACTOR 1) (Protein PHYTOCHROME INTERACTING FACTOR 3-LIKE 5) (Transcription factor EN 101) (bHLH transcription factor bHLH015) [PIF1] [BHLH15] [EN101] [PIL5] [T2G17.2]	phytochrome interacting factor 3-like 5							AT3G10190	Probable calcium-binding protein CML36 (Calmodulin-like protein 36) [CML36] [F14P13.21]	Calcium-binding EF-hand family protein				AT5G61600	Ethylene-responsive transcription factor ERF104 [ERF104] [K11J9.13]	ethylene response factor 104
AT4G38060			AT2G20670		Protein of unknown function (DUF506)							AT3G11580	B3 domain-containing protein At3g11580 (Protein AUXIN RESPONSE FACTOR 32) [ARF32] [F24K9.25]	AP2/B3-like transcriptional factor family protein				AT5G62920	Two-component response regulator ARR6 [ARR6] [MQB2.220] [MQB2.24]	response regulator 6
AT4G39010	Endoglucanase 24 precursor (EC 3.2.1.4) (Endo-1,4-beta glucanase 24) [F19H22.110]	glycosyl hydrolase 9B18	AT2G21560									AT3G15358						AT5G64410	Oligopeptide transporter 4 (AtOPT4) [OPT4] [MSJ1.25]	oligopeptide transporter 4
AT4G39770	Probable trehalose-phosphate phosphatase H (EC 3.1.3.12) (AtTPPH) (Trehalose 6-phosphate phosphatase) [TPPH] [T19P19.160]	Haloacid dehalogenase-like hydrolase (HAD) superfamily protein	AT2G22540	MADS-box protein SVP (Protein SHORT VEGETATIVE PHASE) [SVP] [F14M13.6]	K-box region and MADS-box transcription factor family protein							AT3G15450		Aluminium induced protein with YGL and LRDR motifs
AT4G39795	FCS-Like Zinc finger 7 [FLZ7] [DUF581-13] [T19P19] [T5J17]	Protein of unknown function (DUF581)	AT2G22850		basic leucine-zipper 6							AT3G15630
AT5G01250		alpha 1,4-glycosyltransferase family protein	AT2G23300		Leucine-rich repeat protein kinase family protein							AT3G15720	Probable polygalacturonase At3g15720 precursor (EC 3.2.1.15) (PG) (Pectinase At3g15720) [MSJ11.12]	Pectin lyase-like superfamily protein
AT5G01520	E3 ubiquitin-protein ligase AIRP2 (EC 2.3.2.27) (Protein ABA INSENSITIVE RING PROTEIN 2) (AtAIRP2) (RING-type E3 ubiquitin transferase AIRP2) [AIRP2] [F7A7_40]	RING/U-box superfamily protein	AT2G23340	Ethylene-responsive transcription factor ERF008 [ERF008] [T20D16.3]	DREB and EAR motif protein 3							AT3G16180	Protein NRT1/ PTR FAMILY 1.1 (AtNPF1.1) (Nitrate transporter 1.12) [NPF1.1] [NTR1.12] [MSL1.22]	Major facilitator superfamily protein
AT5G02230		Haloacid dehalogenase-like hydrolase (HAD) superfamily protein	AT2G24160									AT3G19710	Methionine aminotransferase BCAT4 (EC 2.6.1.88) (Branched-chain-amino-acid aminotransferase 4) (Atbcat-4) (Methionine-oxo-acid transaminase BCAT4) [BCAT4] [MMB12_16]	branched-chain aminotransferase4
AT5G03380	Heavy metal-associated isoprenylated plant protein 6 precursor (AtHIP06) (Cadmium induced protein CdI19) [HIPP06] [CDI19] [F12E4_120]	Heavy metal transport/detoxification superfamily protein	AT2G24580	Probable sarcosine oxidase (EC 1.5.3.1) [F25P17.12]	FAD-dependent oxidoreductase family protein							AT3G20340
AT5G03995			AT2G25160		cytochrome P450, family 82, subfamily F, polypeptide 1							AT3G21070	NAD(H) kinase 1 (EC 2.7.1.23) (EC 2.7.1.86) (AtNADK-1) [NADK1] [MSA6.11]	NAD kinase 1
AT5G04330	Cytochrome P450 84A4 (EC 1.14.-.-) [CYP84A4] [T19N18.60]	Cytochrome P450 superfamily protein	AT2G25900	Zinc finger CCCH domain-containing protein 23 (AtC3H23) (Protein ATCTH) [F17H15.7]	Zinc finger C-x8-C-x5-C-x3-H type family protein							AT3G21750	UDP-glycosyltransferase 71B1 (EC 2.4.1.-) (Flavonol 3-O-glucosyltransferase UGT71B1) (EC 2.4.1.91) [UGT71B1] [MSD21.6] [MSD21.8]	UDP-glucosyl transferase 71B1
AT5G06280			AT2G28570									AT3G22810		Plant protein of unknown function (DUF828) with plant pleckstrin homology-like region
AT5G06570	Probable carboxylesterase 15 (AtCXE15) (EC 3.1.1.1) [CXE15] [F15M7.10]	alpha/beta-Hydrolases superfamily protein	AT2G29670		Tetratricopeptide repeat (TPR)-like superfamily protein							AT3G23880	F-box/kelch-repeat protein At3g23880 [F14O13.7]	F-box and associated interaction domains-containing protein
AT5G06630		proline-rich extensin-like family protein	AT2G29750	Flavonol 3-O-glucosyltransferase UGT71C1 (EC 2.4.1.91) (Flavonol 7-O-beta-glucosyltransferase UGT71C1) (EC 2.4.1.237) (UDP-glycosyltransferase 71C1) [UGT71C1] [T27A16.15]	UDP-glucosyl transferase 71C1							AT3G25597
AT5G06640		Proline-rich extensin-like family protein	AT2G30070	Potassium transporter 1 (AtKT1) (AtKUP1) (AtPOT1) [POT1] [KT1] [KUP1] [F23F1.18] [T27E13.19]	potassium transporter 1							AT3G29680	BAHD acyltransferase At3g29680 (EC 2.3.1.-) (Probable anthocyanin acyltransferase) [MOD1.4]	HXXXD-type acyl-transferase family protein
AT5G06670	Kinesin-like protein KIN-7L, chloroplastic precursor [KIN7L] [F15M7.20]	P-loop containing nucleoside triphosphate hydrolases superfamily protein	AT2G30230									AT3G43800	Glutathione S-transferase U27 (EC 2.5.1.18) (AtGSTU27) (GST class-tau member 27) [GSTU27] [T28A8.90]	glutathione S-transferase tau 27
AT5G14940	Protein NRT1/ PTR FAMILY 5.8 (AtNPF5.8) [NPF5.8] [F2G14.60]	Major facilitator superfamily protein	AT2G30520	Root phototropism protein 2 (BTB/POZ domain-containing protein RPT2) [RPT2] [At2g30520/At2g30510] [T6B20.13/T6B20.14]	Phototropic-responsive NPH3 family protein							AT3G45680	Protein NRT1/ PTR FAMILY 2.3 (AtNPF2.3) (Probable nitrate excretion transporter 3) (Protein NAXT1-like 2) [NPF2.3] [T6D9.10]	Major facilitator superfamily protein
AT5G18130			AT2G31020	Oxysterol-binding protein-related protein 1A (OSBP-related protein 1A) [ORP1A] [F7F1.23]	OSBP(oxysterol binding protein)-related protein 1A							AT3G47160		RING/U-box superfamily protein
AT5G25240			AT2G31730	Transcription factor bHLH154 (BHLH transcription factor beta) (bHLH beta) (Basic helix-loop-helix protein 154) (AtbHLH154) (bHLH 154) (bHLH transcription factor bHLH154)[BHLH154] [F20M17.23] [T9H9.27]	basic helix-loop-helix (bHLH) DNA-binding superfamily protein							AT3G48360	BTB/POZ and TAZ domain-containing protein 2 (BTB and TAZ domain protein 2) [BT2] [T29H11.120]	BTB and TAZ domain protein 2
AT5G25890	Auxin-responsive protein IAA28 (Indoleacetic acid-induced protein 28) [IAA28] [F18A17.6] [T1N24.24]	indole-3-acetic acid inducible 28	AT2G32030		Acyl-CoA N-acyltransferases (NAT) superfamily protein							AT3G48390	MA3 DOMAIN-CONTAINING TRANSLATION REGULATORY FACTOR 4 (MA3 domain-containing protein 7) [MRF4] [MAT7] [T29H11_90]	MA3 domain-containing protein
AT5G35190		proline-rich extensin-like family protein	AT2G32200									AT3G48980		Arabidopsis thaliana protein of unknown function (DUF821)
AT5G36180	Serine carboxypeptidase-like 1 precursor (EC 3.4.16.-) [SCPL1] [MAB16.13]	serine carboxypeptidase-like 1	AT2G32390	Glutamate receptor 3.5 precursor (Ionotropic glutamate receptor GLR6) (Ligand-gated ion channel 3.5) [GLR3.5] [GLR6] [T32F6.9]	glutamate receptor 3.5							AT3G49330		Plant invertase/pectin methylesterase inhibitor superfamily protein
AT5G39610	NAC domain-containing protein 92 (ANAC092) (AtNAC2) (AtNAC6) (Protein ORESARA 1) [NAC92] [NAC2] [NAC6] [ORE1] [MIJ24.11]	NAC domain containing protein 6	AT2G32970									AT3G49790		Carbohydrate-binding protein
AT5G42580	Cytochrome P450 705A12 (EC 1.14.-.-) [CYP705A12] [K16E1.5]	cytochrome P450, family 705, subfamily A, polypeptide 12	AT2G33830	Dormancy-associated protein homolog 1 (Auxin-repressed protein 1) (AtARP1) (DRM1 homolog 1) (Dormancy-associated protein 2) (AtDRM2) [DRMH1] [ARP1] [DRM2] [T1B8.13]	Dormancy/auxin associated family protein							AT3G50140		Plant protein of unknown function (DUF247)
AT5G42590	Cytochrome P450 71A16 (EC 1.14.-.-) (Marneral oxidase) [CYP71A16] [MRNO] [MRO] [K16E1.6]	cytochrome P450, family 71, subfamily A, polypeptide 16	AT2G33990	Protein IQ-DOMAIN 9 (AtIQD9) [IQD9] [T14G11.11]	IQ-domain 9							AT3G50440	Methylesterase 10 (EC 3.1.1.-) (AtMES10) [MES10] [T20E23_40]	methyl esterase 10
AT5G42690		Protein of unknown function, DUF547	AT2G34010	Protein SPEAR2 (SPL-like, EAR-containing protein 2) (TCP interactor containing EAR motif protein 4) [SPEAR2] [TIE4] [T14G11.13]								AT3G50630	Cyclin-dependent kinase inhibitor 2 (Inhibitor/interactor of CDK protein 2) (KIP-related protein 2) [KRP2] [ICK2] [T3A5.10]	KIP-related protein 2
AT5G43890	Probable indole-3-pyruvate monooxygenase YUCCA5 (EC 1.14.13.168) (Flavin-containing monooxygenase YUCCA5) (Protein SUPPRESSOR OF ER 1) [YUC5] [SUPER1] [YUCCA5] [F6B6.3]	Flavin-binding monooxygenase family protein	AT2G34610									AT3G50770	Probable calcium-binding protein CML41 (Calmodulin-like protein 41) [CML41] [F18B3.50]	calmodulin-like 41
AT5G44820		Nucleotide-diphospho-sugar transferase family protein	AT2G35470									AT3G52540	Transcription repressor OFP18 (Ovate family protein 18) (AtOFP18) [OFP18] [F22O6.80]	ovate family protein 18
AT5G45650	Subtilisin-like protease SBT5.6 precursor (EC 3.4.21.-) (Subtilase subfamily 5 member 6) (AtSBT5.6) [SBT5.6] [MRA19.5]	subtilase family protein	AT2G36050	Transcription repressor OFP15 (Ovate family protein 15) (AtOFP15) [OFP15] [F11F19.32]	ovate family protein 15							AT3G54990	AP2-like ethylene-responsive transcription factor SMZ (Protein SCHLAFMUTZE) [SMZ] [F28P10.30]	Integrase-type DNA-binding superfamily protein
AT5G46060		Protein of unknown function, DUF599	AT2G36870	Probable xyloglucan endotransglucosylase/hydrolase protein 32 precursor (EC 2.4.1.207) (At-XTH32) (XTH-32) [XTH32] [T1J8.5]	xyloglucan endotransglucosylase/hydrolase 32							AT3G56260
AT5G47980	BAHD acyltransferase At5g47980 (EC 2.3.1.-) [BAHD1] [MDN11.1]	HXXXD-type acyl-transferase family protein	AT2G36950	Heavy metal-associated isoprenylated plant protein 5 precursor (AtHIP05) (Farnesylated protein 2) (AtFP2) [HIPP05] [FP2] [T1J8.13]	Heavy metal transport/detoxification superfamily protein							AT3G56320		PAP/OAS1 substrate-binding domain superfamily
AT5G47990	Cytochrome P450 705A5 (EC 1.14.-.-) (Thalian-diol desaturase) (AtTHAD) [CYP705A5] [THAD] [MDN11.4]	cytochrome P450, family 705, subfamily A, polypeptide 5	AT2G37430	Zinc finger protein ZAT11 [ZAT11] [F3G5.22]	C2H2 and C2HC zinc fingers superfamily protein							AT3G56620	WAT1-related protein At3g56620 [T5P19.270]	nodulin MtN21 /EamA-like transporter family protein
AT5G48000	Cytochrome P450 708A2 (EC 1.14.-.-) (Thalianol hydroxylase) (AtTHAH) [CYP708A2] [THAH] [MDN11.7]	cytochrome P450, family 708, subfamily A, polypeptide 2	AT2G38170	Vacuolar cation/proton exchanger 1 (Ca(2+)/H(+) antiporter CAX1) (Ca(2+)/H(+) exchanger 1) (Protein CATION EXCHANGER 1) (Protein RARE COLD INDUCIBLE 4) [CAX1] [RCI4] [F16M14.10]	cation exchanger 1							AT3G57670	Zinc finger protein WIP2 (Protein NO TRANSMITTING TRACT) (WIP-domain protein 2) (AtWIP2) [WIP2] [NTT] [F15B8.140]	C2H2-type zinc finger family protein
AT5G48010	Thalianol synthase 1 (EC 5.4.99.31) (AtTHAS1) (Oxidosqualene cyclase) (Pentacyclic triterpene synthase 4) (AtPEN4) [THAS1] [OSC] [PEN4] [MDN11.9]	thalianol synthase 1	AT2G39250	AP2-like ethylene-responsive transcription factor SNZ (Protein SCHNARCHZAPFEN) [SNZ] [T16B24.11]	Integrase-type DNA-binding superfamily protein							AT3G59710		NAD(P)-binding Rossmann-fold superfamily protein
AT5G48560	Transcription factor bHLH78 (Basic helix-loop-helix protein 78) (AtbHLH78) (bHLH 78) (Transcription factor EN 86) (bHLH transcription factor bHLH078) [BHLH78] [CIB2] [EN86] [K15N18.2]	basic helix-loop-helix (bHLH) DNA-binding superfamily protein	AT2G39705	Small polypeptide DEVIL 11 (Small polypeptide ROTUNDIFOLIA LIKE 8) (Small polypeptide ROT-FOUR-LIKE 8) [DVL11] [RTFL8] [F17A14.8]	ROTUNDIFOLIA like 8							AT3G60720	Plasmodesmata-located protein 8 precursor (PD-located protein 8) (Cysteine-rich repeat secretory protein 15) [PDLP8] [CRRSP15] [T4C21_130]	plasmodesmata-located protein 8
AT5G49080		transposable element gene	AT2G40200	Transcription factor bHLH51 (Basic helix-loop-helix protein 51) (AtbHLH51) (bHLH 51) (Transcription factor EN 57) (bHLH transcription factor bHLH051) [BHLH51] [EN57] [T7M7.8]	basic helix-loop-helix (bHLH) DNA-binding superfamily protein							AT3G63110	Adenylate isopentenyltransferase 3, chloroplastic precursor (EC 2.5.1.112) (AtIPT3) (Adenylate dimethylallyltransferase 3) (Cytokinin synthase 3) [IPT3] [T20O10.210]	isopentenyltransferase 3
AT5G52110	Protein COFACTOR ASSEMBLY OF COMPLEX C SUBUNIT B CCB2, chloroplastic precursor (Protein HIGH CHLOROPHYLL FLUORESCENCE 208) [CCB2] [HCF208] [MSG15.21]	Protein of unknown function (DUF2930)	AT2G40460	Protein NRT1/ PTR FAMILY 5.1 (AtNPF5.1) [NPF5.1] [T2P4.19]	Major facilitator superfamily protein							AT4G00150	Scarecrow-like protein 6 (AtSCL6) (GRAS family protein 22) (AtGRAS-22) (SCL6-IV) [SCL6] [F6N15.20]	GRAS family transcription factor
AT5G52120	F-box protein PP2-A14 (Protein PHLOEM PROTEIN 2-LIKE A14) (AtPP2-A14) (SKP1-interacting partner 13) [PP2A14] [SKIP13] [MSG15.23]	phloem protein 2-A14	AT2G41810		Protein of unknown function, DUF642							AT4G01026	Abscisic acid receptor PYL7 (ABI1-binding protein 7) (PYR1-like protein 7) (Regulatory components of ABA receptor 2) [PYL7] [ABIP7] [RCAR2] [F3I3]	PYR1-like 7
AT5G57390	AP2-like ethylene-responsive transcription factor AIL5 (Protein AINTEGUMENTA-LIKE 5) [AIL5] [MSF19.5]	AINTEGUMENTA-like 5	AT2G42990	GDSL esterase/lipase At2g42990 precursor (EC 3.1.1.-) (Extracellular lipase At2g42990) [F23E6.2]	GDSL-like Lipase/Acylhydrolase superfamily protein							AT4G01335
AT5G57510			AT2G43560	Peptidyl-prolyl cis-trans isomerase FKBP16-3, chloroplastic precursor (EC 5.2.1.8) (PPIase FKBP16-3) (FK506-binding protein 16-3) (AtFKBP16-3) (Immunophilin FKBP16-3) (Rotamase) [FKBP16-3] [FKBP17] [T1O24.30]	FKBP-like peptidyl-prolyl cis-trans isomerase family protein							AT4G01630	Putative expansin-A17 precursor (AtEXPA17) (Alpha-expansin-17) (At-EXP17) (AtEx17) (Ath-ExpAlpha-1.13) [EXPA17] [EXP17] [T15B16.16]	expansin A17
AT5G58500	Protein LIGHT-DEPENDENT SHORT HYPOCOTYLS 5 (Protein ORGAN BOUNDARY 5) [LSH5] [OBO5] [MQJ2.11]	Protein of unknown function (DUF640)	AT2G46890		Protein of unknown function (DUF1295)							AT4G01700		Chitinase family protein
AT5G59660		Leucine-rich repeat protein kinase family protein	AT2G47240	Long chain acyl-CoA synthetase 1 (EC 6.2.1.3) (Protein ECERIFERUM 8) [LACS1] [CER8] [T8I13.8]	AMP-dependent synthetase and ligase family protein							AT4G02710	Protein NETWORKED 1C [NET1C] [T10P11.22]	Kinase interacting (KIP1-like) family protein
AT5G61340			AT2G47550	Probable pectinesterase/pectinesterase inhibitor 20 precursor [Includes: Pectinesterase inhibitor 20 (Pectin methylesterase inhibitor 20); Pectinesterase 20 (EC 3.1.1.11) (PE 20) (Pectin methylesterase 20) (AtPME20)] [PME20] [ARATH20] [T30B22.15]	Plant invertase/pectin methylesterase inhibitor superfamily							AT4G07400	Putative F-box/LRR-repeat protein 8 [FBL8] [FBL24] [F28D6.13]	VIER F-box proteine 3
AT5G61420	Transcription factor MYB28 (Myb-related protein 28) (AtMYB28) (Protein HIGH ALIPHATIC GLUCOSINOLATE 1) (Protein PRODUCTION OF METHIONINE-DERIVED GLUCOSINOLATE 1) [MYB28][HAG1] [PMG1] [MFB13.22]	myb domain protein 28	AT2G48080		oxidoreductase, 2OG-Fe(II) oxygenase family protein							AT4G08300	WAT1-related protein At4g08300 [T12G13]	nodulin MtN21 /EamA-like transporter family protein
AT5G61600	Ethylene-responsive transcription factor ERF104 [ERF104] [K11J9.13]	ethylene response factor 104	AT3G01750		Ankyrin repeat family protein							AT4G10310	Sodium transporter HKT1 (AtHKT1) [HKT1] [T9A4.5]	high-affinity K+ transporter 1
AT5G62920	Two-component response regulator ARR6 [ARR6] [MQB2.220] [MQB2.24]	response regulator 6	AT3G04060	NAC domain-containing protein 46 (ANAC046) [NAC046] [T11I18.17]	NAC domain containing protein 46							AT4G12740	Adenine DNA glycosylase (EC 3.2.2.31) (MutY homolog) (AtMYH) [MYH] [T20K18.90]	HhH-GPD base excision DNA repair family protein
AT5G64410	Oligopeptide transporter 4 (AtOPT4) [OPT4] [MSJ1.25]	oligopeptide transporter 4	AT3G05390									AT4G14540	Nuclear transcription factor Y subunit B-3 (AtNF-YB-3) (Transcriptional activator HAP3C) [NFYB3] [HAP3C] [dl3310w] [FCAALL.252]	nuclear factor Y, subunit B3
			AT3G05640	Probable protein phosphatase 2C 34 (EC 3.1.3.16) (AtPP2C34) [F18C1.9]	Protein phosphatase 2C family protein							AT4G15430	CSC1-like protein At4g15430 [dl3760w] [FCAALL.292]	ERD (early-responsive to dehydration stress) family protein
			AT3G05770									AT4G15960		alpha/beta-Hydrolases superfamily protein
			AT3G05800	Transcription factor bHLH150 (ATBS1 interacting factor 1) (Basic helix-loop-helix protein 150) (AtbHLH150) (bHLH 150) (Transcription factor EN 145) (bHLH transcription factor bHLH150) [BHLH150] [AIF1] [EN145] [F10A16.9]	AtBS1(activation-tagged BRI1 suppressor 1)-interacting factor 1							AT4G17670	FCS-Like Zinc finger 2 [FLZ2] [DUF581-12] [dl4870c] [FCAALL.414]	Protein of unknown function (DUF581)
			AT3G07310		Protein of unknown function (DUF760)							AT4G17680		SBP (S-ribonuclease binding protein) family protein
			AT3G08490									AT4G18250		receptor serine/threonine kinase, putative
			AT3G09020		alpha 1,4-glycosyltransferase family protein							AT4G18260	Cytochrome b561 domain-containing protein At4g18260 precursor (Protein b561A.tha13) [T9A21.110]	Cytochrome b561/ferric reductase transmembrane protein family
			AT3G09040	Pentatricopeptide repeat-containing protein At3g09040, mitochondrial precursor [PCMP-E88] [MZB10.7]	Pentatricopeptide repeat (PPR) superfamily protein							AT4G18390	Transcription factor TCP2 (Protein TEOSINTE BRANCHED 1) (Protein TEOSINTE-LIKE1, CYCLOIDEA, and PROLIFERATING CELL FACTOR 2) [TCP2] [BRC1] [F28J12.50]	TEOSINTE BRANCHED 1, cycloidea and PCF transcription factor 2
			AT3G10190	Probable calcium-binding protein CML36 (Calmodulin-like protein 36) [CML36] [F14P13.21]	Calcium-binding EF-hand family protein							AT4G18430	Ras-related protein RABA1e (AtRABA1e) [RABA1E] [F28J12.90]	RAB GTPase homolog A1E
			AT3G10960	Adenine/guanine permease AZG1 (AzgA-homolog protein) (Protein AZAGUANINE RESISTANT 1) (AtAzg1) [AZG1] [F9F8.22]	AZA-guanine resistant1							AT4G19160
			AT3G11580	B3 domain-containing protein At3g11580 (Protein AUXIN RESPONSE FACTOR 32) [ARF32] [F24K9.25]	AP2/B3-like transcriptional factor family protein							AT4G20460	Probable UDP-arabinose 4-epimerase 3 (EC 5.1.3.5) (UDP-D-xylose 4-epimerase 3) [F9F13.110]	NAD(P)-binding Rossmann-fold superfamily protein
			AT3G12830	SAUR72	SAUR-like auxin-responsive protein family							AT4G20840	Berberine bridge enzyme-like 21 precursor (EC 1.1.1.-) (AtBBE-like 21) [F21C20.190]	FAD-binding Berberine family protein
			AT3G13730	3-epi-6-deoxocathasterone 23-monooxygenase CYP90D1 (EC 1.14.14.147) (Cytochrome P450 90D1) [CYP90D1] [MMM17.15]	cytochrome P450, family 90, subfamily D, polypeptide 1							AT4G24015	Probable E3 ubiquitin-protein ligase RHA4A (EC 2.3.2.27) (RING-H2 finger A4a) (RING-H2 zinc finger protein RHA4a) (RING-type E3 ubiquitin transferase RHA4A) [RHA4A] [T32A16.6]	RING/U-box superfamily protein
			AT3G15358									AT4G24040	Trehalase (EC 3.2.1.28) (Alpha,alpha-trehalase) (Alpha,alpha-trehalose glucohydrolase) (Trehalase 1) (AtTRE1) [TRE1] [T19F6.15] [T19F6.30]	trehalase 1
			AT3G15450		Aluminium induced protein with YGL and LRDR motifs							AT4G25620		hydroxyproline-rich glycoprotein family protein
			AT3G15630									AT4G25790		CAP (Cysteine-rich secretory proteins, Antigen 5, and Pathogenesis-related 1 protein) superfamily protein
			AT3G15720	Probable polygalacturonase At3g15720 precursor (EC 3.2.1.15) (PG) (Pectinase At3g15720) [MSJ11.12]	Pectin lyase-like superfamily protein							AT4G28150		Protein of unknown function (DUF789)
			AT3G16180	Protein NRT1/ PTR FAMILY 1.1 (AtNPF1.1) (Nitrate transporter 1.12) [NPF1.1] [NTR1.12] [MSL1.22]	Major facilitator superfamily protein							AT4G28350	Probable L-type lectin-domain containing receptor kinase VII.2 precursor (EC 2.7.11.1) (Arabidopsis thaliana lectin-receptor kinase d) (AthlecRK-d) (LecRK-VII.2) [LECRK72] [LECRKD] [F20O9.40]	Concanavalin A-like lectin protein kinase family protein
			AT3G18170		Glycosyltransferase family 61 protein							AT4G28720	Probable indole-3-pyruvate monooxygenase YUCCA8 (EC 1.14.13.168) (Flavin-containing monooxygenase YUCCA8) [YUC8] [BAS3] [YUCCA8] [F16A16.170]	Flavin-binding monooxygenase family protein
			AT3G19710	Methionine aminotransferase BCAT4 (EC 2.6.1.88) (Branched-chain-amino-acid aminotransferase 4) (Atbcat-4) (Methionine-oxo-acid transaminase BCAT4) [BCAT4] [MMB12_16]	branched-chain aminotransferase4							AT4G29110
			AT3G20015	Protein ASPARTIC PROTEASE IN GUARD CELL 2 precursor (EC 3.4.23.-) (AtASPG2) [ASPG2] [MZE19.7]	Eukaryotic aspartyl protease family protein							AT4G30110	Cadmium/zinc-transporting ATPase HMA2 (EC 7.2.2.12) (EC 7.2.2.21) (Cadmium/zinc-transporting ATPase 3) (Protein HEAVY METAL ATPASE 2) [HMA2] [F6G3.140]	heavy metal atpase 2
			AT3G20340									AT4G30370	RING-H2 finger protein ATL14 (EC 2.3.2.27) (RING-type E3 ubiquitin transferase ATL14) [ATL14] [F17I23.290]	RING/U-box superfamily protein
			AT3G21070	NAD(H) kinase 1 (EC 2.7.1.23) (EC 2.7.1.86) (AtNADK-1) [NADK1] [MSA6.11]	NAD kinase 1							AT4G31330		Protein of unknown function, DUF599
			AT3G21560	UDP-glycosyltransferase 84A2 (Protein BRIGHT TRICHOMES 1) (Sinapate 1-glucosyltransferase 1) (EC 2.4.1.120) (AtSGT1) [UGT84A2] [BRT1] [SGT] [SGT1] [MIL23.13]	UDP-Glycosyltransferase superfamily protein							AT4G31470		CAP (Cysteine-rich secretory proteins, Antigen 5, and Pathogenesis-related 1 protein) superfamily protein
			AT3G21710	Vascular-related unknown protein 1 [VUP1]								AT4G32480		Protein of unknown function (DUF506)
			AT3G21750	UDP-glycosyltransferase 71B1 (EC 2.4.1.-) (Flavonol 3-O-glucosyltransferase UGT71B1) (EC 2.4.1.91) [UGT71B1] [MSD21.6] [MSD21.8]	UDP-glucosyl transferase 71B1							AT4G32860
			AT3G22810		Plant protein of unknown function (DUF828) with plant pleckstrin homology-like region							AT4G36240	GATA transcription factor 7 [GATA7] [F23E13.130]	GATA transcription factor 7
			AT3G23880	F-box/kelch-repeat protein At3g23880 [F14O13.7]	F-box and associated interaction domains-containing protein							AT4G36820	Calcium uniporter protein 1, mitochondrial precursor [AP22.5] [C7A10.540]	Protein of unknown function (DUF607)
			AT3G25597									AT4G37250	Probable LRR receptor-like serine/threonine-protein kinase At4g37250 precursor (EC 2.7.11.1) [AP22.22] [C7A10.110]	Leucine-rich repeat protein kinase family protein
			AT3G26610		Pectin lyase-like superfamily protein							AT4G37610	BTB/POZ and TAZ domain-containing protein 5 (BTB and TAZ domain protein 5) [BT5] [F19F18.100]	BTB and TAZ domain protein 5
			AT3G27650	LOB domain-containing protein 25 (ASYMMETRIC LEAVES 2-like protein 3) (AS2-like protein 3) [LBD25] [ASL3] [MGF10.6]	LOB domain-containing protein 25							AT4G37700
			AT3G29035	NAC domain-containing protein 59 (ANAC059) (AtNAC3) (Protein ORE1 SISTER1) [NAC59] [NAC3] [ORS1] [MRI12.1]	NAC domain containing protein 3							AT5G02260	Expansin-A9 precursor (AtEXPA9) (Alpha-expansin-9) (At-EXP9) (AtEx9) (Ath-ExpAlpha-1.10) [EXPA9] [EXP9] [T1E22_20]	expansin A9
			AT3G29680	BAHD acyltransferase At3g29680 (EC 2.3.1.-) (Probable anthocyanin acyltransferase) [MOD1.4]	HXXXD-type acyl-transferase family protein							AT5G03960	Protein IQ-DOMAIN 12 (AtIQD12) [IQD12] [F8F6.170]	IQ-domain 12
			AT3G30180	Cytochrome P450 85A2 (EC 1.14.-.-) (Brassinosteroid-6-oxidase 2) (BR6ox 2) (C6-oxidase 2) [CYP85A2] [BR6OX2] [T20F20.9] [T20F20_6]	brassinosteroid-6-oxidase 2							AT5G07460	Peptide methionine sulfoxide reductase A2 (EC 1.8.4.11) (AtMSRA2) (Peptide-methionine (S)-S-oxide reductase) (Peptide Met(O) reductase) (Protein-methionine-S-oxide reductase) [MRSA2] [PMSR2] [T2I1.170]	peptidemethionine sulfoxide reductase 2
			AT3G30210		myb domain protein 121							AT5G08340	FAD synthetase 2, chloroplastic precursor (EC 2.7.7.2) (AtRibF2) (FAD pyrophosphorylase 2) (FMN adenylyltransferase 2) (Flavin adenine dinucleotide synthase 2) [RIBF2] [F8L15]	Nucleotidylyl transferase superfamily protein
			AT3G43800	Glutathione S-transferase U27 (EC 2.5.1.18) (AtGSTU27) (GST class-tau member 27) [GSTU27] [T28A8.90]	glutathione S-transferase tau 27							AT5G10210
			AT3G44326	F-box protein At3g44326 [T22K7]	F-box family protein							AT5G13910	Ethylene-responsive transcription factor LEP (Protein LEAFY PETIOLE) [LEP] [ERF085] [MAC12.13]	Integrase-type DNA-binding superfamily protein
			AT3G45680	Protein NRT1/ PTR FAMILY 2.3 (AtNPF2.3) (Probable nitrate excretion transporter 3) (Protein NAXT1-like 2) [NPF2.3] [T6D9.10]	Major facilitator superfamily protein							AT5G14340		myb domain protein 40
			AT3G45700	Protein NRT1/ PTR FAMILY 2.4 (AtNPF2.4) (Probable nitrate excretion transporter 5) (Protein NAXT1-like 4) [NPF2.4] [T6D9.30]	Major facilitator superfamily protein							AT5G14880	Potassium transporter 8 (AtHAK8) (AtPOT8) [POT8] [HAK8] [KUP8] [T9L3_180]	Potassium transporter family protein
			AT3G45710	Protein NRT1/ PTR FAMILY 2.5 (AtNPF2.5) (Probable nitrate excretion transporter 6) (Protein NAXT1-like 5) [NPF2.5] [T6D9.40]	Major facilitator superfamily protein							AT5G15830		basic leucine-zipper 3
			AT3G46130	Transcription factor MYB48 (Myb-related protein 48) (AtMYB48) [MYB48] [F12M12.100]	myb domain protein 48							AT5G16230	Stearoyl-[acyl-carrier-protein] 9-desaturase 3, chloroplastic precursor (EC 1.14.19.2) (Stearoyl-ACP desaturase 3) (Acyl-[acyl-carrier-protein] desaturase 3) [S-ACP-DES3] [AAD3] [SAD3] [T21H19_150]	Plant stearoyl-acyl-carrier-protein desaturase family protein
			AT3G47160		RING/U-box superfamily protein							AT5G16600		myb domain protein 43
			AT3G48360	BTB/POZ and TAZ domain-containing protein 2 (BTB and TAZ domain protein 2) [BT2] [T29H11.120]	BTB and TAZ domain protein 2							AT5G18690	Classical arabinogalactan protein 25 precursor [AGP25] [T1A4.70]	arabinogalactan protein 25
			AT3G48390	MA3 DOMAIN-CONTAINING TRANSLATION REGULATORY FACTOR 4 (MA3 domain-containing protein 7) [MRF4] [MAT7] [T29H11_90]	MA3 domain-containing protein							AT5G19970
			AT3G48920		myb domain protein 45							AT5G20250	Probable galactinol--sucrose galactosyltransferase 6 (EC 2.4.1.82) (Protein DARK INDUCIBLE 10) (Raffinose synthase 6) [RFS6] [DIN10] [RS6] [F5O24.140]	Raffinose synthase family protein
			AT3G48980		Arabidopsis thaliana protein of unknown function (DUF821)							AT5G22520
			AT3G49330		Plant invertase/pectin methylesterase inhibitor superfamily protein							AT5G23020	Methylthioalkylmalate synthase 3, chloroplastic precursor (EC 2.3.3.17) (2-isopropylmalate synthase 2) (Methylthioalkylmalate synthase-like) [MAM3] [IMS2] [IPMS_AT1] [MAM-L] [MAM1] [MYJ24.1]	2-isopropylmalate synthase 2
			AT3G49790		Carbohydrate-binding protein							AT5G23050	Probable acyl-activating enzyme 17, peroxisomal (EC 6.2.1.-) [AAE17] [MYJ24.4]	acyl-activating enzyme 17
			AT3G50140		Plant protein of unknown function (DUF247)							AT5G23280	Transcription factor TCP7 [TCP7] [MKD15.14]	TCP family transcription factor
			AT3G50440	Methylesterase 10 (EC 3.1.1.-) (AtMES10) [MES10] [T20E23_40]	methyl esterase 10							AT5G24100	Inactive leucine-rich repeat receptor-like serine/threonine-protein kinase At5g24100 precursor [MZF18.1]	Leucine-rich repeat protein kinase family protein
			AT3G50480	RPW8-like protein 4 (AtHR4) [HR4] [T20E23.80]	homolog of RPW8 4							AT5G25250	Flotillin-like protein 1 (AtFLOT1) (Nodulin-like protein 1) [FLOT1] [F21J6.108]	SPFH/Band 7/PHB domain-containing membrane-associated protein family
			AT3G50630	Cyclin-dependent kinase inhibitor 2 (Inhibitor/interactor of CDK protein 2) (KIP-related protein 2) [KRP2] [ICK2] [T3A5.10]	KIP-related protein 2							AT5G25620	Indole-3-pyruvate monooxygenase YUCCA6 (EC 1.14.13.168) (Flavin-containing monooxygenase YUCCA6) (Protein HYPERTALL1) [YUC6] [HYT1] [YUCCA6] [T14C9.160]	Flavin-binding monooxygenase family protein
			AT3G50770	Probable calcium-binding protein CML41 (Calmodulin-like protein 41) [CML41] [F18B3.50]	calmodulin-like 41							AT5G25810	Ethylene-responsive transcription factor TINY [TINY] [ERF040] [F18A17.60]	Integrase-type DNA-binding superfamily protein
			AT3G50840	BTB/POZ domain-containing protein At3g50840 [F18B3_120]	Phototropic-responsive NPH3 family protein							AT5G26660	Transcription factor MYB86 (Myb homolog 4) (AtMyb4) (Myb-related protein 86) (AtMYB86) [MYB86] [MYB4] [F21E10.4]	myb domain protein 86
			AT3G51400		Arabidopsis protein of unknown function (DUF241)							AT5G26670	Pectin acetylesterase 10 precursor (EC 3.1.1.-) [PAE10] [F21E10.11]	Pectinacetylesterase family protein
			AT3G52480									AT5G28610
			AT3G52540	Transcription repressor OFP18 (Ovate family protein 18) (AtOFP18) [OFP18] [F22O6.80]	ovate family protein 18							AT5G38450	Cytokinin hydroxylase (EC 1.14.13.-) (Cytochrome P450 35A1) [CYP735A1] [MXI10.18]	cytochrome P450, family 735, subfamily A, polypeptide 1
			AT3G53960	Protein NRT1/ PTR FAMILY 5.7 (AtNPF5.7) [NPF5.7] [F5K20.260]	Major facilitator superfamily protein							AT5G40780	Lysine histidine transporter 1 [LHT1] [K1B16.3]	lysine histidine transporter 1
			AT3G54150		S-adenosyl-L-methionine-dependent methyltransferases superfamily protein							AT5G41590	Protein LURP-one-related 17 [MBK23.11]	Protein of unknown function (DUF567)
			AT3G54820	Probable aquaporin PIP2-5 (Plasma membrane intrinsic protein 2-5) (AtPIP2;5) (Plasma membrane intrinsic protein 2d) (PIP2d) [PIP2-5] [PIP2D] [F28P10.200]	plasma membrane intrinsic protein 2;5							AT5G42680		Protein of unknown function, DUF617
			AT3G54990	AP2-like ethylene-responsive transcription factor SMZ (Protein SCHLAFMUTZE) [SMZ] [F28P10.30]	Integrase-type DNA-binding superfamily protein							AT5G44410	Berberine bridge enzyme-like 27 precursor (EC 1.1.1.-) (AtBBE-like 27) [MFC16.3]	FAD-binding Berberine family protein
			AT3G55515	Small polypeptide DEVIL 8 (Small polypeptide ROTUNDIFOLIA LIKE 7) (Small polypeptide ROT-FOUR-LIKE 7) [DVL8] [RTFL7] [T22E16]	ROTUNDIFOLIA like 7							AT5G44574
			AT3G56260									AT5G46050	Protein NRT1/ PTR FAMILY 5.2 (AtNPF5.2) (Peptide transporter PTR3-A) (AtPTR3) [NPF5.2] [PTR3-A] [MCL19.10]	peptide transporter 3
			AT3G56320		PAP/OAS1 substrate-binding domain superfamily							AT5G46330	LRR receptor-like serine/threonine-protein kinase FLS2 precursor (EC 2.7.11.1) (Protein FLAGELLIN-SENSING 2) (Protein FLAGELLIN-SENSITIVE 2) [FLS2] [MPL12.13] [MPL12.8]	Leucine-rich receptor-like protein kinase family protein
			AT3G56620	WAT1-related protein At3g56620 [T5P19.270]	nodulin MtN21 /EamA-like transporter family protein							AT5G47240	Nudix hydrolase 8 (EC 3.6.1.-) (AtNUDT8) [NUDT8] [NUDX8] [MQL5.10]	nudix hydrolase homolog 8
			AT3G57670	Zinc finger protein WIP2 (Protein NO TRANSMITTING TRACT) (WIP-domain protein 2) (AtWIP2) [WIP2] [NTT] [F15B8.140]	C2H2-type zinc finger family protein							AT5G48110	Inactive terpenoid synthase 20, chloroplastic precursor (AtTPS20) [TPS20] [MDN11.20]	Terpenoid cyclases/Protein prenyltransferases superfamily protein
			AT3G59710		NAD(P)-binding Rossmann-fold superfamily protein							AT5G49665	E3 ubiquitin-protein ligase WAV3 (EC 2.3.2.27) (Protein WAVY GROWTH 3) (RING-type E3 ubiquitin transferase WAV3) [WAV3] [K2I5.2]	Zinc finger (C3HC4-type RING finger) family protein
			AT3G60690	SAUR59	SAUR-like auxin-responsive protein family							AT5G49800		Polyketide cyclase/dehydrase and lipid transport superfamily protein
			AT3G60720	Plasmodesmata-located protein 8 precursor (PD-located protein 8) (Cysteine-rich repeat secretory protein 15) [PDLP8] [CRRSP15] [T4C21_130]	plasmodesmata-located protein 8							AT5G53500		Transducin/WD40 repeat-like superfamily protein
			AT3G61060	F-box protein PP2-A13 (Protein PHLOEM PROTEIN 2-LIKE A13) (AtPP2-A13) (SKP1-interacting partner 9) [PP2A13] [SKIP9] [T27I15.150]	phloem protein 2-A13							AT5G53830	VQ motif-containing protein 33 (AtVQ33) (MPK3/6-targeted VQ-motif-containing protein 3) [VQ33] [MVQ3] [MGN6.22]	VQ motif-containing protein
			AT3G63110	Adenylate isopentenyltransferase 3, chloroplastic precursor (EC 2.5.1.112) (AtIPT3) (Adenylate dimethylallyltransferase 3) (Cytokinin synthase 3) [IPT3] [T20O10.210]	isopentenyltransferase 3							AT5G54710		Ankyrin repeat family protein
			AT3G63210	Protein MARD1 (FCS-Like Zinc finger 9) (Mediator of ABA-regulated dormancy1) (Senescence-associated protein SAG102) [MARD1] [DUF581-19] [FLZ9] [SAG102] [F16M2.6]	Protein of unknown function (DUF581)							AT5G54720		Ankyrin repeat family protein
			AT4G00150	Scarecrow-like protein 6 (AtSCL6) (GRAS family protein 22) (AtGRAS-22) (SCL6-IV) [SCL6] [F6N15.20]	GRAS family transcription factor							AT5G54980	CASP-like protein 2D1 (AtCASPL2D1) [MBG8.25]	Uncharacterised protein family (UPF0497)
			AT4G00210	LOB domain-containing protein 31 (ASYMMETRIC LEAVES 2-like protein 22) (AS2-like protein 22) [LBD31] [ASL22] [F6N15.25]	LOB domain-containing protein 31							AT5G55530		Calcium-dependent lipid-binding (CaLB domain) family protein
			AT4G00910	Aluminum-activated malate transporter 10 (AtALMT10) [ALMT10] [A_TM018A10.3] [T18A10.21]	Aluminium activated malate transporter family protein							AT5G55930	Oligopeptide transporter 1 (AtOPT1) [OPT1] [MYN21.4]	oligopeptide transporter 1
			AT4G01026	Abscisic acid receptor PYL7 (ABI1-binding protein 7) (PYR1-like protein 7) (Regulatory components of ABA receptor 2) [PYL7] [ABIP7] [RCAR2] [F3I3]	PYR1-like 7							AT5G57130	Protein SMAX1-LIKE 5 (AtSMXL5) [SMXL5] [MUL3.8]	Clp amino terminal domain-containing protein
			AT4G01335									AT5G57150	Transcription factor bHLH35 (Basic helix-loop-helix protein 35) (AtbHLH35) (bHLH 35) (Transcription factor EN 41) (bHLH transcription factor bHLH035) [BHLH35] [EN41] [MUL3.10]	basic helix-loop-helix (bHLH) DNA-binding superfamily protein
			AT4G01450	WAT1-related protein At4g01450 [F11O4.14]	nodulin MtN21 /EamA-like transporter family protein							AT5G57400
			AT4G01630	Putative expansin-A17 precursor (AtEXPA17) (Alpha-expansin-17) (At-EXP17) (AtEx17) (Ath-ExpAlpha-1.13) [EXPA17] [EXP17] [T15B16.16]	expansin A17							AT5G57630	CBL-interacting serine/threonine-protein kinase 21 (EC 2.7.11.1) (SNF1-related kinase 3.4) (SOS2-like protein kinase PKS23) [CIPK21] [PKS23] [SnRK3.4] [MUA2.22]	CBL-interacting protein kinase 21
			AT4G01700		Chitinase family protein							AT5G58480	Glucan endo-1,3-beta-glucosidase 9 precursor (EC 3.2.1.39) ((1->3)-beta-glucan endohydrolase 9) ((1->3)-beta-glucanase 9) (Beta-1,3-endoglucanase 9) (Beta-1,3-glucanase9) [MQJ2.8]	O-Glycosyl hydrolases family 17 protein
			AT4G02710	Protein NETWORKED 1C [NET1C] [T10P11.22]	Kinase interacting (KIP1-like) family protein							AT5G58960	Protein GRAVITROPIC IN THE LIGHT 1 [GIL1] [K19M22.15]	Plant protein of unknown function (DUF641)
			AT4G03510	E3 ubiquitin-protein ligase RMA1 (EC 2.3.2.27) (Protein RING membrane-anchor 1) (RING-type E3 ubiquitin transferase RMA1) [RMA1] [F9H3.14]	RING membrane-anchor 1							AT5G59960
			AT4G05070		Wound-responsive family protein							AT5G61260		Plant calmodulin-binding protein-related
			AT4G07400	Putative F-box/LRR-repeat protein 8 [FBL8] [FBL24] [F28D6.13]	VIER F-box proteine 3							AT5G61520	Sugar transport protein 3 (Hexose transporter 3) [STP3] [K11J9_40]	Major facilitator superfamily protein
			AT4G08300	WAT1-related protein At4g08300 [T12G13]	nodulin MtN21 /EamA-like transporter family protein							AT5G62380	NAC domain-containing protein 101 (ANAC101) (Protein VASCULAR RELATED NAC-DOMAIN 6) [NAC101] [VND6] [MMI9.21]	NAC-domain protein 101
			AT4G10310	Sodium transporter HKT1 (AtHKT1) [HKT1] [T9A4.5]	high-affinity K+ transporter 1							AT5G62900
			AT4G12740	Adenine DNA glycosylase (EC 3.2.2.31) (MutY homolog) (AtMYH) [MYH] [T20K18.90]	HhH-GPD base excision DNA repair family protein							AT5G64640	Probable pectinesterase/pectinesterase inhibitor 64 [Includes: Pectinesterase inhibitor 64 (Pectin methylesterase inhibitor 64); Pectinesterase 64 (EC 3.1.1.11) (PE 64)(Pectin methylesterase 64) (AtPME64)] [PME64] [ARATH64] [MUB3.16]	Plant invertase/pectin methylesterase inhibitor superfamily
			AT4G13260	Indole-3-pyruvate monooxygenase YUCCA2 (EC 1.14.13.168) (Flavin-containing monooxygenase YUCCA2) [YUC2] [YUCCA2] [F17N18.150]	Flavin-binding monooxygenase family protein							AT5G64870	Flotillin-like protein 3 (Nodulin-like protein 3) [FLOT3] [MXK3.10]	SPFH/Band 7/PHB domain-containing membrane-associated protein family
			AT4G14250	Putative plant UBX domain-containing protein 14 (PUX14) [PUX14] [dl3165c] [FCAALL.151]	structural constituent of ribosome							AT5G65030
			AT4G14540	Nuclear transcription factor Y subunit B-3 (AtNF-YB-3) (Transcriptional activator HAP3C) [NFYB3] [HAP3C] [dl3310w] [FCAALL.252]	nuclear factor Y, subunit B3							AT5G65040	Protein INCREASED RESISTANCE TO MYZUS PERSICAE 1 (FCS-Like Zinc finger 4) [IRM1] [DUF581-18] [FLZ4] [MXK3.29]	Protein of unknown function (DUF581)
			AT4G14930		Survival protein SurE-like phosphatase/nucleotidase							AT5G65207
			AT4G15430	CSC1-like protein At4g15430 [dl3760w] [FCAALL.292]	ERD (early-responsive to dehydration stress) family protein							AT5G65683	Probable E3 ubiquitin-protein ligase WAVH2 (EC 2.3.2.27) (Protein WAV3 homolog 2) (RING-type E3 ubiquitin transferase WAVH2) [WAVH2] [F6H11.200]	Zinc finger (C3HC4-type RING finger) family protein
			AT4G15960		alpha/beta-Hydrolases superfamily protein							AT5G66440
			AT4G16563	Probable aspartyl protease At4g16563 precursor (EC 3.4.23.-) [dl4305c]	Eukaryotic aspartyl protease family protein							AT5G66690	UDP-glycosyltransferase 72E2 (EC 2.4.1.111) (Hydroxycinnamate 4-beta-glucosyltransferase UGT72E2) (EC 2.4.1.126) [UGT72E2] [MSN2.8]	UDP-Glycosyltransferase superfamily protein
			AT4G17670	FCS-Like Zinc finger 2 [FLZ2] [DUF581-12] [dl4870c] [FCAALL.414]	Protein of unknown function (DUF581)							AT5G67150		HXXXD-type acyl-transferase family protein
			AT4G17680		SBP (S-ribonuclease binding protein) family protein							AT5G67160	Protein ENHANCED PSEUDOMONAS SUSCEPTIBILITY 1 (EC 2.3.1.-) [EPS1] [K21H1.12]	HXXXD-type acyl-transferase family protein
			AT4G18250		receptor serine/threonine kinase, putative							AT5G67520	Adenylyl-sulfate kinase 4, chloroplastic precursor (EC 2.7.1.25) (ATP adenosine-5'-phosphosulfate 3'-phosphotransferase 4) (Adenosine-5'-phosphosulfate kinase 4) (APS kinase 4) [APK4] [K9I9.8]	adenosine-5'-phosphosulfate (APS) kinase 4
			AT4G18260	Cytochrome b561 domain-containing protein At4g18260 precursor (Protein b561A.tha13) [T9A21.110]	Cytochrome b561/ferric reductase transmembrane protein family
			AT4G18390	Transcription factor TCP2 (Protein TEOSINTE BRANCHED 1) (Protein TEOSINTE-LIKE1, CYCLOIDEA, and PROLIFERATING CELL FACTOR 2) [TCP2] [BRC1] [F28J12.50]	TEOSINTE BRANCHED 1, cycloidea and PCF transcription factor 2
			AT4G18430	Ras-related protein RABA1e (AtRABA1e) [RABA1E] [F28J12.90]	RAB GTPase homolog A1E
			AT4G18610	Protein LIGHT-DEPENDENT SHORT HYPOCOTYLS 9 (Protein ORGAN BOUNDARY 9) [LSH9] [OBO9] [F28A21.20]	Protein of unknown function (DUF640)
			AT4G19160
			AT4G19420	Pectin acetylesterase 8 precursor (EC 3.1.1.-) [PAE8]	Pectinacetylesterase family protein
			AT4G20460	Probable UDP-arabinose 4-epimerase 3 (EC 5.1.3.5) (UDP-D-xylose 4-epimerase 3) [F9F13.110]	NAD(P)-binding Rossmann-fold superfamily protein
			AT4G20820	Berberine bridge enzyme-like 18 precursor (EC 1.1.1.-) (AtBBE-like 18) [F21C20.170]	FAD-binding Berberine family protein
			AT4G20840	Berberine bridge enzyme-like 21 precursor (EC 1.1.1.-) (AtBBE-like 21) [F21C20.190]	FAD-binding Berberine family protein
			AT4G22690		cytochrome P450, family 706, subfamily A, polypeptide 1
			AT4G23700	Cation/H(+) antiporter 17 (Protein CATION/H+ EXCHANGER 17) (AtCHX17) [CHX17] [F9D16.170]	cation/H+ exchanger 17
			AT4G24015	Probable E3 ubiquitin-protein ligase RHA4A (EC 2.3.2.27) (RING-H2 finger A4a) (RING-H2 zinc finger protein RHA4a) (RING-type E3 ubiquitin transferase RHA4A) [RHA4A] [T32A16.6]	RING/U-box superfamily protein
			AT4G24040	Trehalase (EC 3.2.1.28) (Alpha,alpha-trehalase) (Alpha,alpha-trehalose glucohydrolase) (Trehalase 1) (AtTRE1) [TRE1] [T19F6.15] [T19F6.30]	trehalase 1
			AT4G24050		NAD(P)-binding Rossmann-fold superfamily protein
			AT4G25620		hydroxyproline-rich glycoprotein family protein
			AT4G25790		CAP (Cysteine-rich secretory proteins, Antigen 5, and Pathogenesis-related 1 protein) superfamily protein
			AT4G26120	Regulatory protein NPR2 (BTB/POZ domain-containing protein NPR2) [NPR2] [F20B18.230]	Ankyrin repeat family protein / BTB/POZ domain-containing protein
			AT4G28150		Protein of unknown function (DUF789)
			AT4G28350	Probable L-type lectin-domain containing receptor kinase VII.2 precursor (EC 2.7.11.1) (Arabidopsis thaliana lectin-receptor kinase d) (AthlecRK-d) (LecRK-VII.2) [LECRK72] [LECRKD] [F20O9.40]	Concanavalin A-like lectin protein kinase family protein
			AT4G28530		NAC domain containing protein 74
			AT4G28720	Probable indole-3-pyruvate monooxygenase YUCCA8 (EC 1.14.13.168) (Flavin-containing monooxygenase YUCCA8) [YUC8] [BAS3] [YUCCA8] [F16A16.170]	Flavin-binding monooxygenase family protein
			AT4G29110
			AT4G30110	Cadmium/zinc-transporting ATPase HMA2 (EC 7.2.2.12) (EC 7.2.2.21) (Cadmium/zinc-transporting ATPase 3) (Protein HEAVY METAL ATPASE 2) [HMA2] [F6G3.140]	heavy metal atpase 2
			AT4G30370	RING-H2 finger protein ATL14 (EC 2.3.2.27) (RING-type E3 ubiquitin transferase ATL14) [ATL14] [F17I23.290]	RING/U-box superfamily protein
			AT4G31330		Protein of unknown function, DUF599
			AT4G31470		CAP (Cysteine-rich secretory proteins, Antigen 5, and Pathogenesis-related 1 protein) superfamily protein
			AT4G32480		Protein of unknown function (DUF506)
			AT4G32860
			AT4G36240	GATA transcription factor 7 [GATA7] [F23E13.130]	GATA transcription factor 7
			AT4G36380	3-epi-6-deoxocathasterone 23-monooxygenase CYP90C1 (EC 1.14.14.147) (Cytochrome P450 90C1) (Protein ROTUNDIFOLIA 3) [CYP90C1] [ROT3] [AP22.10] [C7A10.980] [F23E13.220]	Cytochrome P450 superfamily protein
			AT4G36820	Calcium uniporter protein 1, mitochondrial precursor [AP22.5] [C7A10.540]	Protein of unknown function (DUF607)
			AT4G37240
			AT4G37250	Probable LRR receptor-like serine/threonine-protein kinase At4g37250 precursor (EC 2.7.11.1) [AP22.22] [C7A10.110]	Leucine-rich repeat protein kinase family protein
			AT4G37610	BTB/POZ and TAZ domain-containing protein 5 (BTB and TAZ domain protein 5) [BT5] [F19F18.100]	BTB and TAZ domain protein 5
			AT4G37700
			AT4G38060
			AT4G39010	Endoglucanase 24 precursor (EC 3.2.1.4) (Endo-1,4-beta glucanase 24) [F19H22.110]	glycosyl hydrolase 9B18
			AT4G39770	Probable trehalose-phosphate phosphatase H (EC 3.1.3.12) (AtTPPH) (Trehalose 6-phosphate phosphatase) [TPPH] [T19P19.160]	Haloacid dehalogenase-like hydrolase (HAD) superfamily protein
			AT4G39795	FCS-Like Zinc finger 7 [FLZ7] [DUF581-13] [T19P19] [T5J17]	Protein of unknown function (DUF581)
			AT5G01520	E3 ubiquitin-protein ligase AIRP2 (EC 2.3.2.27) (Protein ABA INSENSITIVE RING PROTEIN 2) (AtAIRP2) (RING-type E3 ubiquitin transferase AIRP2) [AIRP2] [F7A7_40]	RING/U-box superfamily protein
			AT5G02230		Haloacid dehalogenase-like hydrolase (HAD) superfamily protein
			AT5G02260	Expansin-A9 precursor (AtEXPA9) (Alpha-expansin-9) (At-EXP9) (AtEx9) (Ath-ExpAlpha-1.10) [EXPA9] [EXP9] [T1E22_20]	expansin A9
			AT5G03380	Heavy metal-associated isoprenylated plant protein 6 precursor (AtHIP06) (Cadmium induced protein CdI19) [HIPP06] [CDI19] [F12E4_120]	Heavy metal transport/detoxification superfamily protein
			AT5G03960	Protein IQ-DOMAIN 12 (AtIQD12) [IQD12] [F8F6.170]	IQ-domain 12
			AT5G03995
			AT5G04330	Cytochrome P450 84A4 (EC 1.14.-.-) [CYP84A4] [T19N18.60]	Cytochrome P450 superfamily protein
			AT5G06570	Probable carboxylesterase 15 (AtCXE15) (EC 3.1.1.1) [CXE15] [F15M7.10]	alpha/beta-Hydrolases superfamily protein
			AT5G06670	Kinesin-like protein KIN-7L, chloroplastic precursor [KIN7L] [F15M7.20]	P-loop containing nucleoside triphosphate hydrolases superfamily protein
			AT5G07460	Peptide methionine sulfoxide reductase A2 (EC 1.8.4.11) (AtMSRA2) (Peptide-methionine (S)-S-oxide reductase) (Peptide Met(O) reductase) (Protein-methionine-S-oxide reductase) [MRSA2] [PMSR2] [T2I1.170]	peptidemethionine sulfoxide reductase 2
			AT5G08340	FAD synthetase 2, chloroplastic precursor (EC 2.7.7.2) (AtRibF2) (FAD pyrophosphorylase 2) (FMN adenylyltransferase 2) (Flavin adenine dinucleotide synthase 2) [RIBF2] [F8L15]	Nucleotidylyl transferase superfamily protein
			AT5G10210
			AT5G13910	Ethylene-responsive transcription factor LEP (Protein LEAFY PETIOLE) [LEP] [ERF085] [MAC12.13]	Integrase-type DNA-binding superfamily protein
			AT5G14340		myb domain protein 40
			AT5G14880	Potassium transporter 8 (AtHAK8) (AtPOT8) [POT8] [HAK8] [KUP8] [T9L3_180]	Potassium transporter family protein
			AT5G15830		basic leucine-zipper 3
			AT5G16230	Stearoyl-[acyl-carrier-protein] 9-desaturase 3, chloroplastic precursor (EC 1.14.19.2) (Stearoyl-ACP desaturase 3) (Acyl-[acyl-carrier-protein] desaturase 3) [S-ACP-DES3] [AAD3] [SAD3] [T21H19_150]	Plant stearoyl-acyl-carrier-protein desaturase family protein
			AT5G16600		myb domain protein 43
			AT5G18130
			AT5G18690	Classical arabinogalactan protein 25 precursor [AGP25] [T1A4.70]	arabinogalactan protein 25
			AT5G19970
			AT5G20250	Probable galactinol--sucrose galactosyltransferase 6 (EC 2.4.1.82) (Protein DARK INDUCIBLE 10) (Raffinose synthase 6) [RFS6] [DIN10] [RS6] [F5O24.140]	Raffinose synthase family protein
			AT5G22520
			AT5G23020	Methylthioalkylmalate synthase 3, chloroplastic precursor (EC 2.3.3.17) (2-isopropylmalate synthase 2) (Methylthioalkylmalate synthase-like) [MAM3] [IMS2] [IPMS_AT1] [MAM-L] [MAM1] [MYJ24.1]	2-isopropylmalate synthase 2
			AT5G23050	Probable acyl-activating enzyme 17, peroxisomal (EC 6.2.1.-) [AAE17] [MYJ24.4]	acyl-activating enzyme 17
			AT5G23280	Transcription factor TCP7 [TCP7] [MKD15.14]	TCP family transcription factor
			AT5G24100	Inactive leucine-rich repeat receptor-like serine/threonine-protein kinase At5g24100 precursor [MZF18.1]	Leucine-rich repeat protein kinase family protein
			AT5G25240
			AT5G25250	Flotillin-like protein 1 (AtFLOT1) (Nodulin-like protein 1) [FLOT1] [F21J6.108]	SPFH/Band 7/PHB domain-containing membrane-associated protein family
			AT5G25620	Indole-3-pyruvate monooxygenase YUCCA6 (EC 1.14.13.168) (Flavin-containing monooxygenase YUCCA6) (Protein HYPERTALL1) [YUC6] [HYT1] [YUCCA6] [T14C9.160]	Flavin-binding monooxygenase family protein
			AT5G25810	Ethylene-responsive transcription factor TINY [TINY] [ERF040] [F18A17.60]	Integrase-type DNA-binding superfamily protein
			AT5G25890	Auxin-responsive protein IAA28 (Indoleacetic acid-induced protein 28) [IAA28] [F18A17.6] [T1N24.24]	indole-3-acetic acid inducible 28
			AT5G26660	Transcription factor MYB86 (Myb homolog 4) (AtMyb4) (Myb-related protein 86) (AtMYB86) [MYB86] [MYB4] [F21E10.4]	myb domain protein 86
			AT5G26670	Pectin acetylesterase 10 precursor (EC 3.1.1.-) [PAE10] [F21E10.11]	Pectinacetylesterase family protein
			AT5G28610
			AT5G36180	Serine carboxypeptidase-like 1 precursor (EC 3.4.16.-) [SCPL1] [MAB16.13]	serine carboxypeptidase-like 1
			AT5G38450	Cytokinin hydroxylase (EC 1.14.13.-) (Cytochrome P450 35A1) [CYP735A1] [MXI10.18]	cytochrome P450, family 735, subfamily A, polypeptide 1
			AT5G39760	Zinc-finger homeodomain protein 10 (AtZHD10) (Homeobox protein 23) (AtHB-23) [ZHD10] [HB23] [MKM21.8]	homeobox protein 23
			AT5G40780	Lysine histidine transporter 1 [LHT1] [K1B16.3]	lysine histidine transporter 1
			AT5G41590	Protein LURP-one-related 17 [MBK23.11]	Protein of unknown function (DUF567)
			AT5G42680		Protein of unknown function, DUF617
			AT5G42690		Protein of unknown function, DUF547
			AT5G43420	RING-H2 finger protein ATL16 (EC 2.3.2.27) (RING-type E3 ubiquitin transferase ATL16) [ATL16] [MWF20.13]	RING/U-box superfamily protein
			AT5G43890	Probable indole-3-pyruvate monooxygenase YUCCA5 (EC 1.14.13.168) (Flavin-containing monooxygenase YUCCA5) (Protein SUPPRESSOR OF ER 1) [YUC5] [SUPER1] [YUCCA5] [F6B6.3]	Flavin-binding monooxygenase family protein
			AT5G44410	Berberine bridge enzyme-like 27 precursor (EC 1.1.1.-) (AtBBE-like 27) [MFC16.3]	FAD-binding Berberine family protein
			AT5G44574
			AT5G44820		Nucleotide-diphospho-sugar transferase family protein
			AT5G45650	Subtilisin-like protease SBT5.6 precursor (EC 3.4.21.-) (Subtilase subfamily 5 member 6) (AtSBT5.6) [SBT5.6] [MRA19.5]	subtilase family protein
			AT5G46050	Protein NRT1/ PTR FAMILY 5.2 (AtNPF5.2) (Peptide transporter PTR3-A) (AtPTR3) [NPF5.2] [PTR3-A] [MCL19.10]	peptide transporter 3
			AT5G46060		Protein of unknown function, DUF599
			AT5G46330	LRR receptor-like serine/threonine-protein kinase FLS2 precursor (EC 2.7.11.1) (Protein FLAGELLIN-SENSING 2) (Protein FLAGELLIN-SENSITIVE 2) [FLS2] [MPL12.13] [MPL12.8]	Leucine-rich receptor-like protein kinase family protein
			AT5G47240	Nudix hydrolase 8 (EC 3.6.1.-) (AtNUDT8) [NUDT8] [NUDX8] [MQL5.10]	nudix hydrolase homolog 8
			AT5G47980	BAHD acyltransferase At5g47980 (EC 2.3.1.-) [BAHD1] [MDN11.1]	HXXXD-type acyl-transferase family protein
			AT5G47990	Cytochrome P450 705A5 (EC 1.14.-.-) (Thalian-diol desaturase) (AtTHAD) [CYP705A5] [THAD] [MDN11.4]	cytochrome P450, family 705, subfamily A, polypeptide 5
			AT5G48110	Inactive terpenoid synthase 20, chloroplastic precursor (AtTPS20) [TPS20] [MDN11.20]	Terpenoid cyclases/Protein prenyltransferases superfamily protein
			AT5G48560	Transcription factor bHLH78 (Basic helix-loop-helix protein 78) (AtbHLH78) (bHLH 78) (Transcription factor EN 86) (bHLH transcription factor bHLH078) [BHLH78] [CIB2] [EN86] [K15N18.2]	basic helix-loop-helix (bHLH) DNA-binding superfamily protein
			AT5G49080		transposable element gene
			AT5G49665	E3 ubiquitin-protein ligase WAV3 (EC 2.3.2.27) (Protein WAVY GROWTH 3) (RING-type E3 ubiquitin transferase WAV3) [WAV3] [K2I5.2]	Zinc finger (C3HC4-type RING finger) family protein
			AT5G49800		Polyketide cyclase/dehydrase and lipid transport superfamily protein
			AT5G52120	F-box protein PP2-A14 (Protein PHLOEM PROTEIN 2-LIKE A14) (AtPP2-A14) (SKP1-interacting partner 13) [PP2A14] [SKIP13] [MSG15.23]	phloem protein 2-A14
			AT5G53500		Transducin/WD40 repeat-like superfamily protein
			AT5G53830	VQ motif-containing protein 33 (AtVQ33) (MPK3/6-targeted VQ-motif-containing protein 3) [VQ33] [MVQ3] [MGN6.22]	VQ motif-containing protein
			AT5G54710		Ankyrin repeat family protein
			AT5G54720		Ankyrin repeat family protein
			AT5G54980	CASP-like protein 2D1 (AtCASPL2D1) [MBG8.25]	Uncharacterised protein family (UPF0497)
			AT5G55530		Calcium-dependent lipid-binding (CaLB domain) family protein
			AT5G55930	Oligopeptide transporter 1 (AtOPT1) [OPT1] [MYN21.4]	oligopeptide transporter 1
			AT5G56860	GATA transcription factor 21 (Protein GATA, NITRATE-INDUCIBLE, CARBON-METABOLISM INVOLVED) (AtGNC) [GATA21] [GNC] [MPI10.2]	GATA type zinc finger transcription factor family protein
			AT5G57130	Protein SMAX1-LIKE 5 (AtSMXL5) [SMXL5] [MUL3.8]	Clp amino terminal domain-containing protein
			AT5G57150	Transcription factor bHLH35 (Basic helix-loop-helix protein 35) (AtbHLH35) (bHLH 35) (Transcription factor EN 41) (bHLH transcription factor bHLH035) [BHLH35] [EN41] [MUL3.10]	basic helix-loop-helix (bHLH) DNA-binding superfamily protein
			AT5G57400
			AT5G57510
			AT5G57630	CBL-interacting serine/threonine-protein kinase 21 (EC 2.7.11.1) (SNF1-related kinase 3.4) (SOS2-like protein kinase PKS23) [CIPK21] [PKS23] [SnRK3.4] [MUA2.22]	CBL-interacting protein kinase 21
			AT5G58480	Glucan endo-1,3-beta-glucosidase 9 precursor (EC 3.2.1.39) ((1->3)-beta-glucan endohydrolase 9) ((1->3)-beta-glucanase 9) (Beta-1,3-endoglucanase 9) (Beta-1,3-glucanase9) [MQJ2.8]	O-Glycosyl hydrolases family 17 protein
			AT5G58500	Protein LIGHT-DEPENDENT SHORT HYPOCOTYLS 5 (Protein ORGAN BOUNDARY 5) [LSH5] [OBO5] [MQJ2.11]	Protein of unknown function (DUF640)
			AT5G58960	Protein GRAVITROPIC IN THE LIGHT 1 [GIL1] [K19M22.15]	Plant protein of unknown function (DUF641)
			AT5G59960
			AT5G61260		Plant calmodulin-binding protein-related
			AT5G61340
			AT5G61420	Transcription factor MYB28 (Myb-related protein 28) (AtMYB28) (Protein HIGH ALIPHATIC GLUCOSINOLATE 1) (Protein PRODUCTION OF METHIONINE-DERIVED GLUCOSINOLATE 1) [MYB28][HAG1] [PMG1] [MFB13.22]	myb domain protein 28
			AT5G61520	Sugar transport protein 3 (Hexose transporter 3) [STP3] [K11J9_40]	Major facilitator superfamily protein
			AT5G61600	Ethylene-responsive transcription factor ERF104 [ERF104] [K11J9.13]	ethylene response factor 104
			AT5G62380	NAC domain-containing protein 101 (ANAC101) (Protein VASCULAR RELATED NAC-DOMAIN 6) [NAC101] [VND6] [MMI9.21]	NAC-domain protein 101
			AT5G62900
			AT5G62920	Two-component response regulator ARR6 [ARR6] [MQB2.220] [MQB2.24]	response regulator 6
			AT5G64410	Oligopeptide transporter 4 (AtOPT4) [OPT4] [MSJ1.25]	oligopeptide transporter 4
			AT5G64640	Probable pectinesterase/pectinesterase inhibitor 64 [Includes: Pectinesterase inhibitor 64 (Pectin methylesterase inhibitor 64); Pectinesterase 64 (EC 3.1.1.11) (PE 64)(Pectin methylesterase 64) (AtPME64)] [PME64] [ARATH64] [MUB3.16]	Plant invertase/pectin methylesterase inhibitor superfamily
			AT5G64870	Flotillin-like protein 3 (Nodulin-like protein 3) [FLOT3] [MXK3.10]	SPFH/Band 7/PHB domain-containing membrane-associated protein family
			AT5G65030
			AT5G65040	Protein INCREASED RESISTANCE TO MYZUS PERSICAE 1 (FCS-Like Zinc finger 4) [IRM1] [DUF581-18] [FLZ4] [MXK3.29]	Protein of unknown function (DUF581)
			AT5G65207
			AT5G65683	Probable E3 ubiquitin-protein ligase WAVH2 (EC 2.3.2.27) (Protein WAV3 homolog 2) (RING-type E3 ubiquitin transferase WAVH2) [WAVH2] [F6H11.200]	Zinc finger (C3HC4-type RING finger) family protein
			AT5G66440
			AT5G66690	UDP-glycosyltransferase 72E2 (EC 2.4.1.111) (Hydroxycinnamate 4-beta-glucosyltransferase UGT72E2) (EC 2.4.1.126) [UGT72E2] [MSN2.8]	UDP-Glycosyltransferase superfamily protein
			AT5G67150		HXXXD-type acyl-transferase family protein
			AT5G67160	Protein ENHANCED PSEUDOMONAS SUSCEPTIBILITY 1 (EC 2.3.1.-) [EPS1] [K21H1.12]	HXXXD-type acyl-transferase family protein
			AT5G67520	Adenylyl-sulfate kinase 4, chloroplastic precursor (EC 2.7.1.25) (ATP adenosine-5'-phosphosulfate 3'-phosphotransferase 4) (Adenosine-5'-phosphosulfate kinase 4) (APS kinase 4) [APK4] [K9I9.8]	adenosine-5'-phosphosulfate (APS) kinase 4

## Sheet: Up-regulated in the light
Auxin up-regulated genes in the light
L5.Up	annotate	Short_description	L50.Up	annotate.1	Short_description.1	L50/L5.Up	annotate.2	Short_description.2	Only.L5.Up	annotate.3	Short_description.3	Only.L50.Up	annotate.4	Short_description.4	Only.L50/L5.Up	annotate.5	Short_description.5	L5.Up.&.L50.Up	annotate.6	Short_description.6	L50.Up.&.L50/L5.Up	annotate.7	Short_description.7	L5.Up.&.L50.Up.&.L50/L5.Up	annotate.8	Short_description.8
AT1G02850	Beta-glucosidase 11 precursor (EC 3.2.1.21) (AtBGLU11) [BGLU11] [F22D16.15]	beta glucosidase 11	AT1G01225		NC domain-containing protein-related	AT1G03780	Protein TPX2 (AtTPX2) (Targeting protein for XKLP2) [TPX2] [F11M21.29]	targeting protein for XKLP2	AT1G12560	Expansin-A7 precursor (AtEXPA7) (Alpha-expansin-7) (At-EXP7) (AtEx7) (Ath-ExpAlpha-1.26) [EXPA7] [EXP7] [F5O11.30] [T12C24.10] [T12C24_8]	expansin A7	AT1G01225		NC domain-containing protein-related	AT1G03780	Protein TPX2 (AtTPX2) (Targeting protein for XKLP2) [TPX2] [F11M21.29]	targeting protein for XKLP2	AT1G02850	Beta-glucosidase 11 precursor (EC 3.2.1.21) (AtBGLU11) [BGLU11] [F22D16.15]	beta glucosidase 11	AT1G03820			AT1G04240	Auxin-responsive protein IAA3 (Indoleacetic acid-induced protein 3) (Short hypocotyl) (Suppressor of HY2) [IAA3] [SHY2] [F19P19.32]	AUX/IAA transcriptional regulator family protein
AT1G04240	Auxin-responsive protein IAA3 (Indoleacetic acid-induced protein 3) (Short hypocotyl) (Suppressor of HY2) [IAA3] [SHY2] [F19P19.32]	AUX/IAA transcriptional regulator family protein	AT1G02670		P-loop containing nucleoside triphosphate hydrolases superfamily protein	AT1G03820			AT1G19540		NmrA-like negative transcriptional regulator family protein	AT1G02670		P-loop containing nucleoside triphosphate hydrolases superfamily protein	AT1G04310	Ethylene response sensor 2 (EC 2.7.11.-) (AtERS2) (Protein ERS2) [ERS2] [F19P19.25]	ethylene response sensor 2	AT1G09350	Galactinol synthase 3 (EC 2.4.1.123) (AtGolS3) (GolS-3) [GOLS3] [F14J9.1]	galactinol synthase 3	AT1G04250	Auxin-responsive protein IAA17 (Auxin response 3) (Indoleacetic acid-induced protein 17) [IAA17] [AXR3] [F19P19.31]	AUX/IAA transcriptional regulator family protein	AT1G07150		mitogen-activated protein kinase kinase kinase 13
AT1G07150		mitogen-activated protein kinase kinase kinase 13	AT1G02850	Beta-glucosidase 11 precursor (EC 3.2.1.21) (AtBGLU11) [BGLU11] [F22D16.15]	beta glucosidase 11	AT1G04240	Auxin-responsive protein IAA3 (Indoleacetic acid-induced protein 3) (Short hypocotyl) (Suppressor of HY2) [IAA3] [SHY2] [F19P19.32]	AUX/IAA transcriptional regulator family protein	AT1G19550		Glutathione S-transferase family protein	AT1G03170	Protein FANTASTIC FOUR 2 [FAF2] [F15K9.21] [F15K9.22]	Protein of unknown function (DUF3049)	AT1G09800		Pseudouridine synthase family protein	AT1G11000	MLO-like protein 4 (AtMlo4) [MLO4] [T19D16.26]	Seven transmembrane MLO family protein	AT1G04550	Auxin-responsive protein IAA12 (Indoleacetic acid-induced protein 12) (Protein BODENLOS) [IAA12] [BDL] [T1G11.20]	AUX/IAA transcriptional regulator family protein	AT1G12080		Vacuolar calcium-binding protein-related
AT1G09350	Galactinol synthase 3 (EC 2.4.1.123) (AtGolS3) (GolS-3) [GOLS3] [F14J9.1]	galactinol synthase 3	AT1G03170	Protein FANTASTIC FOUR 2 [FAF2] [F15K9.21] [F15K9.22]	Protein of unknown function (DUF3049)	AT1G04250	Auxin-responsive protein IAA17 (Auxin response 3) (Indoleacetic acid-induced protein 17) [IAA17] [AXR3] [F19P19.31]	AUX/IAA transcriptional regulator family protein	AT1G27740	Transcription factor RSL3 (Basic helix-loop-helix protein 54) (AtbHLH54) (bHLH 54) (ROOT HAIR DEFECTIVE 6-LIKE 4) (Protein RHD SIX-LIKE 4) (Transcription factor EN 114)(Transcription factor bHLH54) (bHLH transcription factor bHLH054) [RSL4] [BHLH54] [EN114] [T22C5.19]	root hair defective 6-like 4	AT1G04778			AT1G22150	Sulfate transporter 1.3 [SULTR1;3] [F2E2.22]	sulfate transporter 1;3	AT1G11120			AT1G08430	Aluminum-activated malate transporter 1 (AtALMT1) [ALMT1] [T27G7.11]	aluminum-activated malate transporter 1	AT1G13245	Small polypeptide DEVIL 4 (Small polypeptide ROTUNDIFOLIA like 17) (Small polypeptide ROT-FOUR-LIKE 17) [DVL4] [RTFL17] [F3F19.27]	ROTUNDIFOLIA like 17
AT1G11000	MLO-like protein 4 (AtMlo4) [MLO4] [T19D16.26]	Seven transmembrane MLO family protein	AT1G03820			AT1G04310	Ethylene response sensor 2 (EC 2.7.11.-) (AtERS2) (Protein ERS2) [ERS2] [F19P19.25]	ethylene response sensor 2	AT1G61480	G-type lectin S-receptor-like serine/threonine-protein kinase At1g61480 precursor (EC 2.7.11.1) [T1F9.2]	S-locus lectin protein kinase family protein	AT1G09250	Transcription factor bHLH149 (ATBS1 interacting factor 4) (Basic helix-loop-helix protein 149) (AtbHLH149) (bHLH 149) (Transcription factor EN 144) (bHLH transcription factor bHLH149) [BHLH149] [AIF4] [EN144] [T12M4.4]	basic helix-loop-helix (bHLH) DNA-binding superfamily protein	AT1G26840	Origin of replication complex subunit 6 (AtORC6) [ORC6] [T2P11.3]	origin recognition complex protein 6	AT1G12740		cytochrome P450, family 87, subfamily A, polypeptide 2	AT1G11735		MIR171B; miRNA	AT1G13430	Cytosolic sulfotransferase 9 (EC 2.8.2.-) (AtSOT9) (Sulfotransferase 4c) (AtST4b) [STO9] [ST4C] [F13B4.24]	sulfotransferase 4C
AT1G11120			AT1G04240	Auxin-responsive protein IAA3 (Indoleacetic acid-induced protein 3) (Short hypocotyl) (Suppressor of HY2) [IAA3] [SHY2] [F19P19.32]	AUX/IAA transcriptional regulator family protein	AT1G04550	Auxin-responsive protein IAA12 (Indoleacetic acid-induced protein 12) (Protein BODENLOS) [IAA12] [BDL] [T1G11.20]	AUX/IAA transcriptional regulator family protein	AT1G75450	Cytokinin dehydrogenase 5 precursor (EC 1.5.99.12) (Cytokinin oxidase 5) (AtCKX5) (AtCKX6) (CKO5) [CKX5] [CKX6] [F1B16.2]	cytokinin oxidase 5	AT1G10750		Protein of Unknown Function (DUF239)	AT1G33440	Protein NRT1/ PTR FAMILY 4.4 (AtNPF4.4) (Nitrate transporter 1.13) [NPF4.4] [NRT1.13] [F10C21.11]	Major facilitator superfamily protein	AT1G14280	Protein PHYTOCHROME KINASE SUBSTRATE 2 [PKS2] [F14L17.4]	phytochrome kinase substrate 2	AT1G12070		Immunoglobulin E-set superfamily protein	AT1G15580	Auxin-responsive protein IAA5 (Auxin-induced protein AUX2-27) (Indoleacetic acid-induced protein 5) [IAA5] [AUX2-27] [T16N11.9]	indole-3-acetic acid inducible 5
AT1G12080		Vacuolar calcium-binding protein-related	AT1G04250	Auxin-responsive protein IAA17 (Auxin response 3) (Indoleacetic acid-induced protein 17) [IAA17] [AXR3] [F19P19.31]	AUX/IAA transcriptional regulator family protein	AT1G07150		mitogen-activated protein kinase kinase kinase 13	AT2G26560	Patatin-like protein 2 (EC 3.1.1.-) (AtPLP2) (Patatin-related phospholipase A IIalpha) (pPLAIIa) (Phospholipase A IIA) (AtPLAIIA) [PLP2] [T9J22.23]	phospholipase A 2A	AT1G11125			AT1G50590	Pirin-like protein At1g50590 [F11F12.9] [F17J6.11]	RmlC-like cupins superfamily protein	AT1G21050		Protein of unknown function, DUF617	AT1G13250	Probable galacturonosyltransferase-like 3 (EC 2.4.1.-) [GATL3] [T6J4.1] [T6J4.2]	galacturonosyltransferase-like 3	AT1G23080	Auxin efflux carrier component 7 (AtPIN7) [PIN7] [AEH1] [T26J12.14]	Auxin efflux carrier family protein
AT1G12560	Expansin-A7 precursor (AtEXPA7) (Alpha-expansin-7) (At-EXP7) (AtEx7) (Ath-ExpAlpha-1.26) [EXPA7] [EXP7] [F5O11.30] [T12C24.10] [T12C24_8]	expansin A7	AT1G04550	Auxin-responsive protein IAA12 (Indoleacetic acid-induced protein 12) (Protein BODENLOS) [IAA12] [BDL] [T1G11.20]	AUX/IAA transcriptional regulator family protein	AT1G08430	Aluminum-activated malate transporter 1 (AtALMT1) [ALMT1] [T27G7.11]	aluminum-activated malate transporter 1	AT2G33000		ubiquitin-associated (UBA)/TS-N domain-containing protein-related	AT1G11545	Probable xyloglucan endotransglucosylase/hydrolase protein 8 precursor (EC 2.4.1.207) (At-XTH8) (XTH-8) [XTH8] [T23J18.21]	xyloglucan endotransglucosylase/hydrolase 8	AT1G61255			AT1G21830			AT1G13670			AT1G23340		Protein of Unknown Function (DUF239)
AT1G12740		cytochrome P450, family 87, subfamily A, polypeptide 2	AT1G04778			AT1G09800		Pseudouridine synthase family protein	AT2G46740	L-gulonolactone oxidase 5 precursor (EC 1.1.3.8) (AtGulLO5) [GULLO5] [F19D11.2]	D-arabinono-1,4-lactone oxidase family protein	AT1G12860	Transcription factor SCREAM2 (Basic helix-loop-helix protein 33) (AtbHLH33) (bHLH 33) (Transcription factor EN 44) (bHLH transcription factor bHLH033) [SCRM2] [BHLH33] [EN44] [F13K23.12]	basic helix-loop-helix (bHLH) DNA-binding superfamily protein	AT1G65060	4-coumarate--CoA ligase 3 (EC 6.2.1.12) (4CL 3) (4-coumarate--CoA ligase isoform 3) (At4CL3) (4-coumaroyl-CoA synthase 3) [4CL3] [F16G16.6]	4-coumarate:CoA ligase 3	AT1G21980	Phosphatidylinositol 4-phosphate 5-kinase 1 (EC 2.7.1.68) (AtPIP5K1) (1-phosphatidylinositol 4-phosphate kinase 1) (Diphosphoinositide kinase 1) (PtdIns(4)P-5-kinase 1)[PIP5K1] [P5K1] [F2E2.1]	phosphatidylinositol-4-phosphate 5-kinase 1	AT1G14185		Glucose-methanol-choline (GMC) oxidoreductase family protein	AT1G26945	Transcription factor PRE6 (Basic helix-loop-helix protein 163) (AtbHLH163) (bHLH 163) (Protein KIDARI) (Protein PACLOBUTRAZOL RESISTANCE 6) (bHLH transcription factor bHLH163) [PRE6] [BHLH163] [KDR] [T2P11]	basic helix-loop-helix (bHLH) DNA-binding superfamily protein
AT1G13245	Small polypeptide DEVIL 4 (Small polypeptide ROTUNDIFOLIA like 17) (Small polypeptide ROT-FOUR-LIKE 17) [DVL4] [RTFL17] [F3F19.27]	ROTUNDIFOLIA like 17	AT1G07150		mitogen-activated protein kinase kinase kinase 13	AT1G11735		MIR171B; miRNA	AT3G28600	AAA-ATPase At3g28600 precursor (EC 3.6.1.-) [MZN14.6]	P-loop containing nucleoside triphosphate hydrolases superfamily protein	AT1G13590	Phytosulfokines 1 precursor (AtPSK1) [Contains: Phytosulfokine-alpha (PSK-alpha) (Phytosulfokine-a); Phytosulfokine-beta (PSK-beta) (Phytosulfokine-b)] [PSK1] [F21F23.2]	phytosulfokine 1 precursor	AT1G68640	Transcription factor PERIANTHIA (bZIP transcription factor 46) (AtbZIP46) [PAN] [F24J5.12]	bZIP transcription factor family protein	AT1G26770	Expansin-A10 precursor (AtEXPA10) (Alpha-expansin-10) (At-EXP10) (AtEx10) (Ath-ExpAlpha-1.1) [EXPA10] [EXP10] [T24P13.15] [T24P13_14]	expansin A10	AT1G14190		Glucose-methanol-choline (GMC) oxidoreductase family protein	AT1G29290	Precursor of CEP14 precursor (PCEP14) [Contains: C-terminally encoded peptide 14 (CEP14)] [CEP14] [F28N24.30]
AT1G13430	Cytosolic sulfotransferase 9 (EC 2.8.2.-) (AtSOT9) (Sulfotransferase 4c) (AtST4b) [STO9] [ST4C] [F13B4.24]	sulfotransferase 4C	AT1G08430	Aluminum-activated malate transporter 1 (AtALMT1) [ALMT1] [T27G7.11]	aluminum-activated malate transporter 1	AT1G12070		Immunoglobulin E-set superfamily protein	AT3G45290	MLO-like protein 3 (AtMlo3) [MLO3] [F18N11.50]	Seven transmembrane MLO family protein	AT1G14390	Probable LRR receptor-like serine/threonine-protein kinase At1g14390 precursor (EC 2.7.11.1) [F14L17.16]	Leucine-rich repeat protein kinase family protein	AT1G73830	Transcription factor BEE 3 (Basic helix-loop-helix protein 50) (AtbHLH50) (bHLH 50) (Protein Brassinosteroid enhanced expression 3) (Transcription factor EN 76) (bHLH transcription factor bHLH050) [BEE3] [BHLH50] [EN76] [F25P22.25]	BR enhanced expression 3	AT1G27210	TORTIFOLIA1-like protein 4 [TOR1L4] [F17L21.1] [T7N9.27]	ARM repeat superfamily protein	AT1G15760		Sterile alpha motif (SAM) domain-containing protein	AT1G29430	SAUR62	SAUR-like auxin-responsive protein family
AT1G14280	Protein PHYTOCHROME KINASE SUBSTRATE 2 [PKS2] [F14L17.4]	phytochrome kinase substrate 2	AT1G09250	Transcription factor bHLH149 (ATBS1 interacting factor 4) (Basic helix-loop-helix protein 149) (AtbHLH149) (bHLH 149) (Transcription factor EN 144) (bHLH transcription factor bHLH149) [BHLH149] [AIF4] [EN144] [T12M4.4]	basic helix-loop-helix (bHLH) DNA-binding superfamily protein	AT1G12080		Vacuolar calcium-binding protein-related	AT3G49620	Probable 2-oxoglutarate-dependent dioxygenase DIN11 (EC 1.14.11.-) (Protein DARK-INDUCIBLE 11) [DIN11] [T9C5.210]	2-oxoglutarate (2OG) and Fe(II)-dependent oxygenase superfamily protein	AT1G15520	ABC transporter G family member 40 (ABC transporter ABCG.40) (AtABCG40) (Pleiotropic drug resistance protein 12) [ABCG40] [PDR12] [PDR9] [T16N11.3]	pleiotropic drug resistance 12	AT2G02150	Putative pentatricopeptide repeat-containing protein At2g02150 [F5O4.8]	Tetratricopeptide repeat (TPR)-like superfamily protein	AT1G29420	SAUR61	SAUR-like auxin-responsive protein family	AT1G26960	Homeobox-leucine zipper protein ATHB-23 (HD-ZIP protein ATHB-23) (Homeodomain transcription factor ATHB-23) [ATHB-23] [T2P11.15]	homeobox protein 23	AT1G29440	SAUR63	SAUR-like auxin-responsive protein family
AT1G15580	Auxin-responsive protein IAA5 (Auxin-induced protein AUX2-27) (Indoleacetic acid-induced protein 5) [IAA5] [AUX2-27] [T16N11.9]	indole-3-acetic acid inducible 5	AT1G09350	Galactinol synthase 3 (EC 2.4.1.123) (AtGolS3) (GolS-3) [GOLS3] [F14J9.1]	galactinol synthase 3	AT1G13245	Small polypeptide DEVIL 4 (Small polypeptide ROTUNDIFOLIA like 17) (Small polypeptide ROT-FOUR-LIKE 17) [DVL4] [RTFL17] [F3F19.27]	ROTUNDIFOLIA like 17	AT3G51660		Tautomerase/MIF superfamily protein	AT1G15550	Gibberellin 3-beta-dioxygenase 1 (EC 1.14.11.15) (GA 3-oxidase 1) (AtGA3ox1) (Gibberellin 3 beta-hydroxylase 1) [GA3OX1] [GA4] [T16N11.6]	gibberellin 3-oxidase 1	AT2G40750	Probable WRKY transcription factor 54 (WRKY DNA-binding protein 54) [WRKY54] [T7D17.7]	WRKY DNA-binding protein 54	AT1G30820		CTP synthase family protein	AT1G28130	Indole-3-acetic acid-amido synthetase GH3.17 (EC 6.3.2.-) (Auxin-responsive GH3-like protein 17) (AtGH3-17) [GH3.17] [F13K9.22] [F3H9.21] [F3H9_19]	Auxin-responsive GH3 family protein	AT1G29450	SAUR64	SAUR-like auxin-responsive protein family
AT1G19540		NmrA-like negative transcriptional regulator family protein	AT1G10750		Protein of Unknown Function (DUF239)	AT1G13250	Probable galacturonosyltransferase-like 3 (EC 2.4.1.-) [GATL3] [T6J4.1] [T6J4.2]	galacturonosyltransferase-like 3	AT3G55970	Jasmonate-induced oxygenase 3 (EC 1.14.11.-) (2-oxoglutarate-dependent dioxygenase JOX3) (Jasmonic acid oxidase 3) (Protein JASMONATE-REGULATED GENE 21) [JOX3] [JAO3] [JRG21] [F27K19_150]	jasmonate-regulated gene 21	AT1G17180	Glutathione S-transferase U25 (EC 2.5.1.18) (AtGSTU25) (GST class-tau member 25) [GSTU25] [F20D23.12A]	glutathione S-transferase TAU 25	AT2G41990			AT1G47860		transposable element gene	AT1G29660	GDSL esterase/lipase At1g29660 precursor (EC 3.1.1.-) (Apoplastic EDS1-dependent protein 3) (Extracellular lipase At1g29660) [F15D2.21]	GDSL-like Lipase/Acylhydrolase superfamily protein	AT1G29460	SAUR65	SAUR-like auxin-responsive protein family
AT1G19550		Glutathione S-transferase family protein	AT1G11000	MLO-like protein 4 (AtMlo4) [MLO4] [T19D16.26]	Seven transmembrane MLO family protein	AT1G13430	Cytosolic sulfotransferase 9 (EC 2.8.2.-) (AtSOT9) (Sulfotransferase 4c) (AtST4b) [STO9] [ST4C] [F13B4.24]	sulfotransferase 4C	AT3G60140	Beta-glucosidase 30 precursor (EC 3.2.1.21) (AtBGLU30) (Protein DARK INDUCIBLE 2) (Protein SENESCENCE-RELATED GENE 2) [BGLU30] [DIN2] [SRG2] [T2O9.120]	Glycosyl hydrolase superfamily protein	AT1G17870	Probable zinc metallopeptidase EGY3, chloroplastic precursor (EC 3.4.24.-) (Protein ETHYLENE-DEPENDENT GRAVITROPISM-DEFICIENT AND YELLOW-GREEN 3) (AtEGY3) [EGY3] [F2H15.10]	ethylene-dependent gravitropism-deficient and yellow-green-like 3	AT2G45120	Zinc finger protein ZAT4 [ZAT4] [T14P1.7]	C2H2-like zinc finger protein	AT1G53470	Mechanosensitive ion channel protein 4 (Mechanosensitive channel of small conductance-like 4) (MscS-Like protein 4) [MSL4] [F22G10.15] [T3F20.21]	mechanosensitive channel of small conductance-like 4	AT1G30190			AT1G29465
AT1G21050		Protein of unknown function, DUF617	AT1G11120			AT1G13670			AT3G61930			AT1G18400	Transcription factor BEE 1 (Basic helix-loop-helix protein 44) (AtbHLH44) (bHLH 44) (Protein Brassinosteroid enhanced expression 1) (Transcription factor EN 77) (bHLH transcription factor bHLH044) [BEE1] [BHLH44] [EN77] [F15H18.11] [F15H18.16]	BR enhanced expression 1	AT2G46870	B3 domain-containing transcription factor NGA1 (Protein NGATHA 1) [NGA1] [F19D11.25]	AP2/B3-like transcriptional factor family protein	AT1G60010			AT1G31320	LOB domain-containing protein 4 (ASYMMETRIC LEAVES 2-like protein 6) (AS2-like protein 6) [LBD4] [ASL6] [T19E23.11]	LOB domain-containing protein 4	AT1G29490	SAUR68	SAUR-like auxin-responsive protein family
AT1G21830			AT1G11125			AT1G14185		Glucose-methanol-choline (GMC) oxidoreductase family protein	AT4G16250	Phytochrome D [PHYD] [dl4165c]	phytochrome D	AT1G18610		Galactose oxidase/kelch repeat superfamily protein	AT3G02670		Glycine-rich protein family	AT1G62440	Leucine-rich repeat extensin-like protein 2 precursor (AtLRX2) (LRR/EXTENSIN2) (Cell wall hydroxyproline-rich glycoprotein) [LRX2] [F24O1.18] [T3P18.1]	leucine-rich repeat/extensin 2	AT1G31880	Protein BREVIS RADIX (AtBRX) [BRX] [F5M6.11]	DZC (Disease resistance/zinc finger/chromosome condensation-like region) domain containing protein	AT1G29500	SAUR66	SAUR-like auxin-responsive protein family
AT1G21980	Phosphatidylinositol 4-phosphate 5-kinase 1 (EC 2.7.1.68) (AtPIP5K1) (1-phosphatidylinositol 4-phosphate kinase 1) (Diphosphoinositide kinase 1) (PtdIns(4)P-5-kinase 1)[PIP5K1] [P5K1] [F2E2.1]	phosphatidylinositol-4-phosphate 5-kinase 1	AT1G11545	Probable xyloglucan endotransglucosylase/hydrolase protein 8 precursor (EC 2.4.1.207) (At-XTH8) (XTH-8) [XTH8] [T23J18.21]	xyloglucan endotransglucosylase/hydrolase 8	AT1G14190		Glucose-methanol-choline (GMC) oxidoreductase family protein	AT4G16350	Calcineurin B-like protein 6 (SOS3-like calcium-binding protein 2) [CBL6] [SCABP2] [dl4205c] [FCAALL.89]	calcineurin B-like protein 6	AT1G18670	Protein IMPAIRED IN BABA-INDUCED STERILITY 1 (EC 2.7.11.-) [IBS1] [F6A14.22]	Protein kinase superfamily protein	AT3G25620	ABC transporter G family member 21 (ABC transporter ABCG.21) (AtABCG21) (White-brown complex homolog protein 21) (AtWBC21) [ABCG21] [WBC21] [T5M7.6]	ABC-2 type transporter family protein	AT1G62770	Pectinesterase inhibitor 9 precursor (Pectin methylesterase inhibitor 9) (AtPMEI9) [PMEI9] [F23N19.14]	Plant invertase/pectin methylesterase inhibitor superfamily protein	AT1G32190		alpha/beta-Hydrolases superfamily protein	AT1G29510	SAUR67	SAUR-like auxin-responsive protein family
AT1G23080	Auxin efflux carrier component 7 (AtPIN7) [PIN7] [AEH1] [T26J12.14]	Auxin efflux carrier family protein	AT1G11735		MIR171B; miRNA	AT1G15580	Auxin-responsive protein IAA5 (Auxin-induced protein AUX2-27) (Indoleacetic acid-induced protein 5) [IAA5] [AUX2-27] [T16N11.9]	indole-3-acetic acid inducible 5	AT4G38390	Protein ROOT HAIR SPECIFIC 17 (EC 2.4.1.-) (O-fucosyltransferase 32) (O-FucT-32) (O-fucosyltransferase family protein) [RHS17] [OFUT32] [F22I13.160]	root hair specific 17	AT1G18835	Mini zinc finger protein 3 (AtMIF3) [MIF3] [F6A14]	mini zinc finger	AT3G45230		hydroxyproline-rich glycoprotein family protein	AT1G63840		RING/U-box superfamily protein	AT1G52565			AT1G30100	Probable 9-cis-epoxycarotenoid dioxygenase NCED5, chloroplastic precursor (EC 1.13.11.51) (AtNCED5) [NCED5] [T2H7.10]	nine-cis-epoxycarotenoid dioxygenase 5
AT1G23340		Protein of Unknown Function (DUF239)	AT1G12070		Immunoglobulin E-set superfamily protein	AT1G15760		Sterile alpha motif (SAM) domain-containing protein	AT4G40090	Classical arabinogalactan protein 3 precursor [AGP3] [T5J17.1]	arabinogalactan protein 3	AT1G19220	Auxin response factor 19 (Auxin-responsive protein IAA22) [ARF19] [IAA22] [T29M8.9]	auxin response factor 19	AT3G49580	Protein RESPONSE TO LOW SULFUR 1 [LSU1] [T9C5.170]	response to low sulfur 1	AT1G64405			AT1G53070	Lectin-like protein At1g53070 precursor [F8L10.7]	Legume lectin family protein	AT1G51170	Serine/threonine-protein kinase UCN (EC 2.7.11.1) (AGC serine/threonine-protein kinase subfamily 2 member 3) (Protein UNICORN) [UNC] [AGC2-3] [F11M15.3] [F23H24.1]	Protein kinase superfamily protein
AT1G26770	Expansin-A10 precursor (AtEXPA10) (Alpha-expansin-10) (At-EXP10) (AtEx10) (Ath-ExpAlpha-1.1) [EXPA10] [EXP10] [T24P13.15] [T24P13_14]	expansin A10	AT1G12080		Vacuolar calcium-binding protein-related	AT1G22150	Sulfate transporter 1.3 [SULTR1;3] [F2E2.22]	sulfate transporter 1;3	AT5G07010	Cytosolic sulfotransferase 15 (EC 2.8.2.39) (AtSOT15) (Sulfotransferase 2a) (AtST2a) [SOT15] [ST2A] [MOJ9.18]	sulfotransferase 2A	AT1G21520			AT3G59420	Serine/threonine-protein kinase-like protein ACR4 precursor (EC 2.7.11.1) (Protein CRINKLY 4) (AtCR4) [ACR4] [F25L23.280]	crinkly4	AT1G65840	Probable polyamine oxidase 4 (EC 1.5.3.16) (AtPAO4) (Amine oxidase 2) [PAO4] [F1E22.18]	polyamine oxidase 4	AT1G53163			AT1G52830	Auxin-responsive protein IAA6 (Indoleacetic acid-induced protein 6) [IAA6] [SHY1] [F14G24.10]	indole-3-acetic acid 6
AT1G26945	Transcription factor PRE6 (Basic helix-loop-helix protein 163) (AtbHLH163) (bHLH 163) (Protein KIDARI) (Protein PACLOBUTRAZOL RESISTANCE 6) (bHLH transcription factor bHLH163) [PRE6] [BHLH163] [KDR] [T2P11]	basic helix-loop-helix (bHLH) DNA-binding superfamily protein	AT1G12740		cytochrome P450, family 87, subfamily A, polypeptide 2	AT1G23080	Auxin efflux carrier component 7 (AtPIN7) [PIN7] [AEH1] [T26J12.14]	Auxin efflux carrier family protein	AT5G21120	ETHYLENE INSENSITIVE 3-like 2 protein [EIL2] [T10F18.150]	ETHYLENE-INSENSITIVE3-like 2	AT1G21990	Putative F-box protein At1g21990 [F2E2.2]	F-box/RNI-like/FBD-like domains-containing protein	AT4G29020		glycine-rich protein	AT1G70560	L-tryptophan--pyruvate aminotransferase 1 (EC 2.6.1.27) (EC 2.6.1.99) (Protein CYTOKININ INDUCED ROOT CURLING 1) (Protein SHADE AVOIDANCE 3) (Protein TRANSPORT INHIBITORRESPONSE 2) (Protein TRYPTOPHAN AMINOTRANSFERASE OF ARABIDOPSIS 1) (Protein WEAK ETHYLENE INSENSITIVE 8) (Tryptophan transaminase) [TAA1] [CKRC1] [SAV3] [TIR2] [WEI8] [F24J13.13] [F5A18.26]	tryptophan aminotransferase of Arabidopsis 1	AT1G54020	GDSL esterase/lipase At1g54020 precursor (EC 3.1.1.-) (Extracellular lipase At1g54020) [F15I1.10]	GDSL-like Lipase/Acylhydrolase superfamily protein	AT1G58007
AT1G27210	TORTIFOLIA1-like protein 4 [TOR1L4] [F17L21.1] [T7N9.27]	ARM repeat superfamily protein	AT1G12860	Transcription factor SCREAM2 (Basic helix-loop-helix protein 33) (AtbHLH33) (bHLH 33) (Transcription factor EN 44) (bHLH transcription factor bHLH033) [SCRM2] [BHLH33] [EN44] [F13K23.12]	basic helix-loop-helix (bHLH) DNA-binding superfamily protein	AT1G23340		Protein of Unknown Function (DUF239)	AT5G22300	Bifunctional nitrilase/nitrile hydratase NIT4 (EC 3.5.5.1) (EC 3.5.5.4) (EC 4.2.1.65) (Cyanoalanine nitrilase) (Nitrilase 4) [NIT4] [MWD9.8]	nitrilase 4	AT1G22990	Heavy metal-associated isoprenylated plant protein 22 precursor (AtHIP22) (AtHIPP22) (Farnesylated protein 7) (AtFP7) [HIPP22] [FP7] [F19G10.25]	Heavy metal transport/detoxification superfamily protein	AT4G30800	40S ribosomal protein S11-2 [RPS11B] [F6I18.290]	Nucleic acid-binding, OB-fold-like protein	AT1G75490	Dehydration-responsive element-binding protein 2D (Protein DREB2D) [DREB2D] [ERF049] [F10A5.29]	Integrase-type DNA-binding superfamily protein	AT1G55910	Zinc transporter 11 precursor (ZRT/IRT-like protein 11) [ZIP11] [F14J16.16]	zinc transporter 11 precursor	AT1G58340	Protein DETOXIFICATION 48 (AtDTX48) (Multidrug and toxic compound extrusion protein 48) (MATE protein 48) (Protein ABNORMAL SHOOT 4) (Protein BUSH-AND-CHLOROTIC-DWARF 1)(Protein BCD1) (Protein ZRIZI) [DTX48] [ABS4] [BCD1] [ZF14] [ZRZ] [F19C14.5]	MATE efflux family protein
AT1G27740	Transcription factor RSL3 (Basic helix-loop-helix protein 54) (AtbHLH54) (bHLH 54) (ROOT HAIR DEFECTIVE 6-LIKE 4) (Protein RHD SIX-LIKE 4) (Transcription factor EN 114)(Transcription factor bHLH54) (bHLH transcription factor bHLH054) [RSL4] [BHLH54] [EN114] [T22C5.19]	root hair defective 6-like 4	AT1G13245	Small polypeptide DEVIL 4 (Small polypeptide ROTUNDIFOLIA like 17) (Small polypeptide ROT-FOUR-LIKE 17) [DVL4] [RTFL17] [F3F19.27]	ROTUNDIFOLIA like 17	AT1G26840	Origin of replication complex subunit 6 (AtORC6) [ORC6] [T2P11.3]	origin recognition complex protein 6	AT5G26290		TRAF-like family protein	AT1G23000	Heavy metal-associated isoprenylated plant protein 37 precursor (AtHIP37) [HIPP37] [F19G10.6]	Heavy metal transport/detoxification superfamily protein	AT4G39330	Probable cinnamyl alcohol dehydrogenase 9 (EC 1.1.1.195) (AtCAD9) [CAD9] [CAD1] [T22F8.230]	cinnamyl alcohol dehydrogenase 9	AT1G79760		downstream target of AGL15-4	AT1G60750	Probable aldo-keto reductase 6 (EC 1.1.1.-) [F8A5.26]	NAD(P)-linked oxidoreductase superfamily protein	AT1G59740	Protein NRT1/ PTR FAMILY 4.3 (AtNPF4.3) (Nitrate transporter 1.14) [NPF4.3] [NRT1.14] [F23H11.6]	Major facilitator superfamily protein
AT1G29290	Precursor of CEP14 precursor (PCEP14) [Contains: C-terminally encoded peptide 14 (CEP14)] [CEP14] [F28N24.30]		AT1G13250	Probable galacturonosyltransferase-like 3 (EC 2.4.1.-) [GATL3] [T6J4.1] [T6J4.2]	galacturonosyltransferase-like 3	AT1G26945	Transcription factor PRE6 (Basic helix-loop-helix protein 163) (AtbHLH163) (bHLH 163) (Protein KIDARI) (Protein PACLOBUTRAZOL RESISTANCE 6) (bHLH transcription factor bHLH163) [PRE6] [BHLH163] [KDR] [T2P11]	basic helix-loop-helix (bHLH) DNA-binding superfamily protein	AT5G44480	Putative UDP-arabinose 4-epimerase 4 (EC 5.1.3.5) (UDP-D-xylose 4-epimerase 4) [MFC16.15]	NAD(P)-binding Rossmann-fold superfamily protein	AT1G23010	Multicopper oxidase LPR1 precursor (EC 1.-.-.-) (Protein LOW PHOSPHATE ROOT 1) [LPR1] [F19G10.5]	Cupredoxin superfamily protein	AT4G39800	Inositol-3-phosphate synthase isozyme 1 (EC 5.5.1.4) (AtIPS1) (MIP synthase 1) (Myo-inositol 1-phosphate synthase 1) (AtMIPS 1) (MI-1-P synthase 1) [IPS1] [MIPS1] [T19P19.190]	myo-inositol-1-phosphate synthase 1	AT2G03830	Protein GOLVEN 6 precursor (CLAVATA3/ESR (CLE)-related protein CLEL2) (CLE-Like protein 2) (Root meristem growth factor 8) (AtRGF8) [Contains: GLV6p] [GLV6] [CLEL2] [RGF8] [T18C20.3]		AT1G64625	Transcription factor bHLH157 (BHLH transcription factor epsilon) (bHLH epsilon) (Basic helix-loop-helix protein 157) (AtbHLH157) (bHLH 157) (LONESOME HIGHWAY-like protein 2) (bHLH transcription factor bHLH157) [BHLH157] [F1N19]	Serine/threonine-protein kinase WNK (With No Lysine)-related	AT1G63420		Arabidopsis thaliana protein of unknown function (DUF821)
AT1G29420	SAUR61	SAUR-like auxin-responsive protein family	AT1G13430	Cytosolic sulfotransferase 9 (EC 2.8.2.-) (AtSOT9) (Sulfotransferase 4c) (AtST4b) [STO9] [ST4C] [F13B4.24]	sulfotransferase 4C	AT1G26960	Homeobox-leucine zipper protein ATHB-23 (HD-ZIP protein ATHB-23) (Homeodomain transcription factor ATHB-23) [ATHB-23] [T2P11.15]	homeobox protein 23				AT1G23060			AT5G19260	Protein FANTASTIC FOUR 3 [FAF3] [F7K24.10]	Protein of unknown function (DUF3049)	AT2G04090	Protein DETOXIFICATION 5 (AtDTX5) (Multidrug and toxic compound extrusion protein 5) (MATE protein 5) [DTX5] [F3L12.8]	MATE efflux family protein	AT1G64670	Probable lysophospholipase BODYGUARD 1 precursor (EC 3.1.1.-) (AtBDG1) (Protein 9-cis epoxycarotenoid dioxygenase defective 1) (Protein COOL BREATH 5) [BDG1] [BDG] [CB5][CED1] [F1N19.24]	alpha/beta-Hydrolases superfamily protein	AT1G65920		Regulator of chromosome condensation (RCC1) family with FYVE zinc finger domain
AT1G29430	SAUR62	SAUR-like auxin-responsive protein family	AT1G13590	Phytosulfokines 1 precursor (AtPSK1) [Contains: Phytosulfokine-alpha (PSK-alpha) (Phytosulfokine-a); Phytosulfokine-beta (PSK-beta) (Phytosulfokine-b)] [PSK1] [F21F23.2]	phytosulfokine 1 precursor	AT1G28130	Indole-3-acetic acid-amido synthetase GH3.17 (EC 6.3.2.-) (Auxin-responsive GH3-like protein 17) (AtGH3-17) [GH3.17] [F13K9.22] [F3H9.21] [F3H9_19]	Auxin-responsive GH3 family protein				AT1G23350		Plant invertase/pectin methylesterase inhibitor superfamily protein	AT5G26220	Gamma-glutamylcyclotransferase 2-1 (EC 4.3.2.9) (AtGGCT2;1) (Gamma-glutamyl cyclotransferase 2;1) [GGCT2;1]	ChaC-like family protein	AT2G14820	BTB/POZ domain-containing protein NPY2 (Protein NAKED PINS IN YUC MUTANTS 2) [NPY2] [F26C24.4]	Phototropic-responsive NPH3 family protein	AT1G66940		protein kinase-related	AT1G67900	BTB/POZ domain-containing protein At1g67900 [T23K23.25]	Phototropic-responsive NPH3 family protein
AT1G29440	SAUR63	SAUR-like auxin-responsive protein family	AT1G13670			AT1G29290	Precursor of CEP14 precursor (PCEP14) [Contains: C-terminally encoded peptide 14 (CEP14)] [CEP14] [F28N24.30]					AT1G25209			AT5G45670	GDSL esterase/lipase At5g45670 precursor (EC 3.1.1.-) (Extracellular lipase At5g45670) [MRA19.6]	GDSL-like Lipase/Acylhydrolase superfamily protein	AT2G17080		Arabidopsis protein of unknown function (DUF241)	AT1G70550		Protein of Unknown Function (DUF239)	AT1G68620	Probable carboxylesterase 6 (AtCXE6) (EC 3.1.1.1) [CXE6] [F24J5.14]	alpha/beta-Hydrolases superfamily protein
AT1G29450	SAUR64	SAUR-like auxin-responsive protein family	AT1G14185		Glucose-methanol-choline (GMC) oxidoreductase family protein	AT1G29430	SAUR62	SAUR-like auxin-responsive protein family				AT1G25510		Eukaryotic aspartyl protease family protein	AT5G53980	Homeobox-leucine zipper protein ATHB-52 (HD-ZIP protein ATHB-52) (Homeodomain transcription factor ATHB-52) [ATHB-52] [K19P17.15]	homeobox protein 52	AT2G22800	Homeobox-leucine zipper protein HAT9 (Homeodomain-leucine zipper protein HAT9) (HD-ZIP protein 9) [HAT9] [T20K9.1] [T30L20.6]	Homeobox-leucine zipper protein family	AT1G70910		RING/U-box superfamily protein	AT1G70920	Homeobox-leucine zipper protein ATHB-X (HD-ZIP protein ATHB-X) (Homeodomain transcription factor ATHB-X) [ATHB-X] [F15H11_25]	homeobox-leucine zipper protein 18
AT1G29460	SAUR65	SAUR-like auxin-responsive protein family	AT1G14190		Glucose-methanol-choline (GMC) oxidoreductase family protein	AT1G29440	SAUR63	SAUR-like auxin-responsive protein family				AT1G29020		Calcium-binding EF-hand family protein	AT5G65610			AT2G27000		cytochrome P450, family 705, subfamily A, polypeptide 8	AT1G71380	Endoglucanase 9 precursor (EC 3.2.1.4) (Cellulase 3) (AtCEL3) (Endo-1,4-beta glucanase 9) [CEL3] [F26A9.24]	cellulase 3	AT1G70940	Auxin efflux carrier component 3 (AtPIN3) [PIN3] [F15H11.14]	Auxin efflux carrier family protein
AT1G29465			AT1G14280	Protein PHYTOCHROME KINASE SUBSTRATE 2 [PKS2] [F14L17.4]	phytochrome kinase substrate 2	AT1G29450	SAUR64	SAUR-like auxin-responsive protein family				AT1G29160	Dof zinc finger protein DOF1.5 (AtDOF1.5) [DOF1.5] [COG1] [F28N24.35]	Dof-type zinc finger DNA-binding family protein				AT2G28350	Auxin response factor 10 [ARF10] [T1B3.13]	auxin response factor 10	AT1G72230		Cupredoxin superfamily protein	AT1G73590	Auxin efflux carrier component 1 (Protein PIN-FORMED) (AtPIN1) [PIN1] [F6D5.2]	Auxin efflux carrier family protein
AT1G29490	SAUR68	SAUR-like auxin-responsive protein family	AT1G14390	Probable LRR receptor-like serine/threonine-protein kinase At1g14390 precursor (EC 2.7.11.1) [F14L17.16]	Leucine-rich repeat protein kinase family protein	AT1G29460	SAUR65	SAUR-like auxin-responsive protein family				AT1G30570	Probable receptor-like protein kinase At1g30570 precursor (EC 2.7.11.-) [T5I8.2]	hercules receptor kinase 2				AT2G34650	Protein kinase PINOID (EC 2.7.11.1) (Protein kinase ABRUPTUS) [PID] [ABR] [T31E10.1]	Protein kinase superfamily protein	AT1G75240	Zinc-finger homeodomain protein 5 (AtZHD5) (Homeobox protein 33) (AtHB-33) [ZHD5] [HB33] [F22H5.4]	homeobox protein 33	AT1G74110		cytochrome P450, family 78, subfamily A, polypeptide 10
AT1G29500	SAUR66	SAUR-like auxin-responsive protein family	AT1G15520	ABC transporter G family member 40 (ABC transporter ABCG.40) (AtABCG40) (Pleiotropic drug resistance protein 12) [ABCG40] [PDR12] [PDR9] [T16N11.3]	pleiotropic drug resistance 12	AT1G29465						AT1G31885	Aquaporin NIP3-1 (NOD26-like intrinsic protein 3-1) (AtNIP3;1) [NIP3-1] [F5M6.28]	NOD26-like intrinsic protein 3;1				AT2G36220			AT1G75640		Leucine-rich receptor-like protein kinase family protein	AT1G78100	F-box protein AUF1 (F-box protein At1g78100) (Protein AUXIN UP-REGULATED F-BOX PROTEIN 1) [AUF1] [T11I11.4]	F-box family protein
AT1G29510	SAUR67	SAUR-like auxin-responsive protein family	AT1G15550	Gibberellin 3-beta-dioxygenase 1 (EC 1.14.11.15) (GA 3-oxidase 1) (AtGA3ox1) (Gibberellin 3 beta-hydroxylase 1) [GA3OX1] [GA4] [T16N11.6]	gibberellin 3-oxidase 1	AT1G29490	SAUR68	SAUR-like auxin-responsive protein family				AT1G36940						AT2G41850	Polygalacturonase ADPG2 precursor (EC 3.2.1.15) (AtADPG2) (PG ADPG2) (Pectinase ADPG2) (Protein ARABIDOPSIS DEHISCENCE ZONE POLYGALACTURONASE 2) [ADPG2] [PGAZAT] [T11A7.5]	polygalacturonase abscission zone A. thaliana	AT1G76610		Protein of unknown function, DUF617	AT1G80240		Protein of unknown function, DUF642
AT1G30100	Probable 9-cis-epoxycarotenoid dioxygenase NCED5, chloroplastic precursor (EC 1.13.11.51) (AtNCED5) [NCED5] [T2H7.10]	nine-cis-epoxycarotenoid dioxygenase 5	AT1G15580	Auxin-responsive protein IAA5 (Auxin-induced protein AUX2-27) (Indoleacetic acid-induced protein 5) [IAA5] [AUX2-27] [T16N11.9]	indole-3-acetic acid inducible 5	AT1G29500	SAUR66	SAUR-like auxin-responsive protein family				AT1G47510	Type IV inositol polyphosphate 5-phosphatase 11 (EC 3.1.3.36) (EC 3.1.3.86) (At5PTase11) [IP5P11] [F16N3.22]	inositol polyphosphate 5-phosphatase 11				AT2G42430	LOB domain-containing protein 16 (ASYMMETRIC LEAVES 2-like protein 18) (AS2-like protein 18) [LBD16] [ASL18] [MHK10.15]	lateral organ boundaries-domain 16	AT1G77110	Auxin efflux carrier component 6 (AtPIN6) [PIN6] [F22K20.18]	Auxin efflux carrier family protein	AT2G01430	Homeobox-leucine zipper protein ATHB-17 (HD-ZIP protein ATHB-17) (Homeodomain transcription factor ATHB-17) [ATHB-17] [F2I9.5]	homeobox-leucine zipper protein 17
AT1G30820		CTP synthase family protein	AT1G15760		Sterile alpha motif (SAM) domain-containing protein	AT1G29510	SAUR67	SAUR-like auxin-responsive protein family				AT1G47655	Dof zinc finger protein DOF1.6 (AtDOF1.6) [DOF1.6] [F16N3.5]	Dof-type zinc finger DNA-binding family protein				AT2G42440	LOB domain-containing protein 17 (ASYMMETRIC LEAVES 2-like protein 15) (AS2-like protein 15) [LBD17] [ASL15] [MHK10.16]	Lateral organ boundaries (LOB) domain family protein	AT2G01200	Auxin-responsive protein IAA32 (Indoleacetic acid-induced protein 32) [IAA32] [F10A8.8]	indole-3-acetic acid inducible 32	AT2G14960	Probable indole-3-acetic acid-amido synthetase GH3.1 (EC 6.3.2.-) (Auxin-responsive GH3-like protein 1) (AtGH3-1) [GH3.1] [T26I20.12]	Auxin-responsive GH3 family protein
AT1G47860		transposable element gene	AT1G17180	Glutathione S-transferase U25 (EC 2.5.1.18) (AtGSTU25) (GST class-tau member 25) [GSTU25] [F20D23.12A]	glutathione S-transferase TAU 25	AT1G29660	GDSL esterase/lipase At1g29660 precursor (EC 3.1.1.-) (Apoplastic EDS1-dependent protein 3) (Extracellular lipase At1g29660) [F15D2.21]	GDSL-like Lipase/Acylhydrolase superfamily protein				AT1G48330						AT2G43860	Probable polygalacturonase At2g43860 precursor (EC 3.2.1.15) (PG) (Pectinase At2g43860) [F18O19.3]	Pectin lyase-like superfamily protein	AT2G12462			AT2G21050	Auxin transporter-like protein 2 (AUX1-like protein 2) [LAX2] [F26H11.19]	like AUXIN RESISTANT 2
AT1G51170	Serine/threonine-protein kinase UCN (EC 2.7.11.1) (AGC serine/threonine-protein kinase subfamily 2 member 3) (Protein UNICORN) [UNC] [AGC2-3] [F11M15.3] [F23H24.1]	Protein kinase superfamily protein	AT1G17870	Probable zinc metallopeptidase EGY3, chloroplastic precursor (EC 3.4.24.-) (Protein ETHYLENE-DEPENDENT GRAVITROPISM-DEFICIENT AND YELLOW-GREEN 3) (AtEGY3) [EGY3] [F2H15.10]	ethylene-dependent gravitropism-deficient and yellow-green-like 3	AT1G30100	Probable 9-cis-epoxycarotenoid dioxygenase NCED5, chloroplastic precursor (EC 1.13.11.51) (AtNCED5) [NCED5] [T2H7.10]	nine-cis-epoxycarotenoid dioxygenase 5				AT1G49200	RING-H2 finger protein ATL75 (EC 2.3.2.27) (RING-type E3 ubiquitin transferase ATL75) [ATL75] [F27J15.33]	RING/U-box superfamily protein				AT3G01490		Protein kinase superfamily protein	AT2G18010	SAUR10	SAUR-like auxin-responsive protein family	AT2G22810	1-aminocyclopropane-1-carboxylate synthase 4 (EC 4.4.1.14) (ACC synthase 4) (S-adenosyl-L-methionine methylthioadenosine-lyase 4) [ACS4] [ACC4] [T20K9.2]	1-aminocyclopropane-1-carboxylate synthase 4
AT1G52830	Auxin-responsive protein IAA6 (Indoleacetic acid-induced protein 6) [IAA6] [SHY1] [F14G24.10]	indole-3-acetic acid 6	AT1G18400	Transcription factor BEE 1 (Basic helix-loop-helix protein 44) (AtbHLH44) (bHLH 44) (Protein Brassinosteroid enhanced expression 1) (Transcription factor EN 77) (bHLH transcription factor bHLH044) [BEE1] [BHLH44] [EN77] [F15H18.11] [F15H18.16]	BR enhanced expression 1	AT1G30190						AT1G49210	E3 ubiquitin-protein ligase ATL76 (EC 2.3.2.27) (RING-H2 finger protein ATL76) (RING-type E3 ubiquitin transferase ATL76) [ATL76] [F27J15.3]	RING/U-box superfamily protein				AT3G03660	WUSCHEL-related homeobox 11 [WOX11] [T12J13.6]	WUSCHEL related homeobox 11	AT2G18480	Probable polyol transporter 3 [PLT3] [F24H14.17]	Major facilitator superfamily protein	AT2G22830	Squalene epoxidase 2, mitochondrial precursor (EC 1.14.14.17) (AtSQE2) [SQE2] [T20K9.4]	squalene epoxidase 2
AT1G53470	Mechanosensitive ion channel protein 4 (Mechanosensitive channel of small conductance-like 4) (MscS-Like protein 4) [MSL4] [F22G10.15] [T3F20.21]	mechanosensitive channel of small conductance-like 4	AT1G18610		Galactose oxidase/kelch repeat superfamily protein	AT1G31320	LOB domain-containing protein 4 (ASYMMETRIC LEAVES 2-like protein 6) (AS2-like protein 6) [LBD4] [ASL6] [T19E23.11]	LOB domain-containing protein 4				AT1G49740		PLC-like phosphodiesterases superfamily protein				AT3G05980			AT2G23060	Probable N-acetyltransferase HLS1-like (EC 2.3.1.-) [F21P24.12]	Acyl-CoA N-acyltransferases (NAT) superfamily protein	AT2G23170	Indole-3-acetic acid-amido synthetase GH3.3 (EC 6.3.2.-) (Auxin-responsive GH3-like protein 3) (AtGH3-3) [GH3.3] [T20D16.20]	Auxin-responsive GH3 family protein
AT1G58007			AT1G18670	Protein IMPAIRED IN BABA-INDUCED STERILITY 1 (EC 2.7.11.-) [IBS1] [F6A14.22]	Protein kinase superfamily protein	AT1G31880	Protein BREVIS RADIX (AtBRX) [BRX] [F5M6.11]	DZC (Disease resistance/zinc finger/chromosome condensation-like region) domain containing protein				AT1G49780	U-box domain-containing protein 26 (EC 2.3.2.27) (Plant U-box protein 26) (RING-type E3 ubiquitin transferase PUB26) [PUB26] [F14J22.1]	plant U-box 26				AT3G06450	Probable boron transporter 3 [BOR3] [F24P17.6]	HCO3- transporter family	AT2G23910		NAD(P)-binding Rossmann-fold superfamily protein	AT2G23180		cytochrome P450, family 96, subfamily A, polypeptide 1
AT1G58340	Protein DETOXIFICATION 48 (AtDTX48) (Multidrug and toxic compound extrusion protein 48) (MATE protein 48) (Protein ABNORMAL SHOOT 4) (Protein BUSH-AND-CHLOROTIC-DWARF 1)(Protein BCD1) (Protein ZRIZI) [DTX48] [ABS4] [BCD1] [ZF14] [ZRZ] [F19C14.5]	MATE efflux family protein	AT1G18835	Mini zinc finger protein 3 (AtMIF3) [MIF3] [F6A14]	mini zinc finger	AT1G32190		alpha/beta-Hydrolases superfamily protein				AT1G51190	AP2-like ethylene-responsive transcription factor PLT2 (Protein AINTEGUMENTA-LIKE 4) (Protein PLETHORA 2) [PLT2] [AIL4] [F11M15.6]	Integrase-type DNA-binding superfamily protein				AT3G07000		Cysteine/Histidine-rich C1 domain family protein	AT2G24070	QWRF motif-containing protein 4 [QWRF4] [T29E15.27]	Family of unknown function (DUF566)	AT2G26710	Cytochrome P450 734A1 (EC 1.14.-.-) (Protein PHYB ACTIVATION-TAGGED SUPPRESSOR 1) [CYP734A1] [BAS1] [F18A8.8]	Cytochrome P450 superfamily protein
AT1G59740	Protein NRT1/ PTR FAMILY 4.3 (AtNPF4.3) (Nitrate transporter 1.14) [NPF4.3] [NRT1.14] [F23H11.6]	Major facilitator superfamily protein	AT1G19220	Auxin response factor 19 (Auxin-responsive protein IAA22) [ARF19] [IAA22] [T29M8.9]	auxin response factor 19	AT1G33440	Protein NRT1/ PTR FAMILY 4.4 (AtNPF4.4) (Nitrate transporter 1.13) [NPF4.4] [NRT1.13] [F10C21.11]	Major facilitator superfamily protein				AT1G51380	DEAD-box ATP-dependent RNA helicase 34 (EC 3.6.4.13) (AtRH34) [RH34] [F11M15.24] [F5D21.11]	DEA(D/H)-box RNA helicase family protein				AT3G07010	Probable pectate lyase 8 precursor (EC 4.2.2.2) [F17A9.16]	Pectin lyase-like superfamily protein	AT2G25790	Leucine-rich repeat receptor-like serine/threonine-protein kinase SKM1 precursor (EC 2.7.11.1) (Protein STERILITY-REGULATING KINASE MEMBER 1) [SKM1] [F17H15.18]	Leucine-rich receptor-like protein kinase family protein	AT2G29980	Acyl-lipid omega-3 desaturase (cytochrome b5), endoplasmic reticulum (EC 1.14.19.25) (Omega-3 fatty acid desaturase 3, endoplasmic reticulum) [FAD3] [F23F1.10]	fatty acid desaturase 3
AT1G60010			AT1G21050		Protein of unknown function, DUF617	AT1G50590	Pirin-like protein At1g50590 [F11F12.9] [F17J6.11]	RmlC-like cupins superfamily protein				AT1G51860	Probable LRR receptor-like serine/threonine-protein kinase At1g51860 precursor (EC 2.7.11.1) [T14L22.7]	Leucine-rich repeat protein kinase family protein				AT3G12610	DNA damage-repair/toleration protein DRT100 precursor [DRT100] [MMF12.5] [T2E22.8] [T2E22_107]	Leucine-rich repeat (LRR) family protein	AT2G26700	Protein kinase PINOID 2 (EC 2.7.11.1) (Protein kinase AGC1-10) [PID2] [AGC1-10] [F18A8.7]	AGC (cAMP-dependent, cGMP-dependent and protein kinase C) kinase family protein	AT2G30040		mitogen-activated protein kinase kinase kinase 14
AT1G61480	G-type lectin S-receptor-like serine/threonine-protein kinase At1g61480 precursor (EC 2.7.11.1) [T1F9.2]	S-locus lectin protein kinase family protein	AT1G21520			AT1G51170	Serine/threonine-protein kinase UCN (EC 2.7.11.1) (AGC serine/threonine-protein kinase subfamily 2 member 3) (Protein UNICORN) [UNC] [AGC2-3] [F11M15.3] [F23H24.1]	Protein kinase superfamily protein				AT1G52560	26.5 kDa heat shock protein, mitochondrial precursor (AtHsp26.5) [HSP26.5] [F6D8.22]	HSP20-like chaperones superfamily protein				AT3G12710		DNA glycosylase superfamily protein	AT2G28305	Cytokinin riboside 5'-monophosphate phosphoribohydrolase LOG1 (EC 3.2.2.n1) (Protein LONELY GUY 1) [LOG1] [T1B3.18] [T3B23.2]	Putative lysine decarboxylase family protein	AT2G32100	Transcription repressor OFP16 (Ovate family protein 16) (AtOFP16) [OFP16] [F22D22.15]	ovate family protein 16
AT1G62440	Leucine-rich repeat extensin-like protein 2 precursor (AtLRX2) (LRR/EXTENSIN2) (Cell wall hydroxyproline-rich glycoprotein) [LRX2] [F24O1.18] [T3P18.1]	leucine-rich repeat/extensin 2	AT1G21830			AT1G52565						AT1G52827		cadmium tolerance 1				AT3G14440	9-cis-epoxycarotenoid dioxygenase NCED3, chloroplastic precursor (EC 1.13.11.51) (AtNCED3) (Protein SALT TOLERANT 1) [NCED3] [STO1] [MOA2.4]	nine-cis-epoxycarotenoid dioxygenase 3	AT2G32560	F-box protein At2g32560 [T26B15.12]	F-box family protein	AT2G33310	Auxin-responsive protein IAA13 (Indoleacetic acid-induced protein 13) [IAA13] [F4P9.8]	auxin-induced protein 13
AT1G62770	Pectinesterase inhibitor 9 precursor (Pectin methylesterase inhibitor 9) (AtPMEI9) [PMEI9] [F23N19.14]	Plant invertase/pectin methylesterase inhibitor superfamily protein	AT1G21980	Phosphatidylinositol 4-phosphate 5-kinase 1 (EC 2.7.1.68) (AtPIP5K1) (1-phosphatidylinositol 4-phosphate kinase 1) (Diphosphoinositide kinase 1) (PtdIns(4)P-5-kinase 1)[PIP5K1] [P5K1] [F2E2.1]	phosphatidylinositol-4-phosphate 5-kinase 1	AT1G52830	Auxin-responsive protein IAA6 (Indoleacetic acid-induced protein 6) [IAA6] [SHY1] [F14G24.10]	indole-3-acetic acid 6				AT1G53290	Probable beta-1,3-galactosyltransferase 14 (EC 2.4.1.-) [B3GALT14] [F12M16.19]	Galactosyltransferase family protein				AT3G19200			AT2G39700	Expansin-A4 precursor (AtEXPA4) (Alpha-expansin-4) (At-EXP4) (AtEx4) (Ath-ExpAlpha-1.6) [EXPA4] [EXP4] [F17A14.7]	expansin A4	AT2G35600	Protein Brevis radix-like 1 (AtBRXL1) [BRXL1] [T32F12.2]	BREVIS RADIX-like 1
AT1G63420		Arabidopsis thaliana protein of unknown function (DUF821)	AT1G21990	Putative F-box protein At1g21990 [F2E2.2]	F-box/RNI-like/FBD-like domains-containing protein	AT1G53070	Lectin-like protein At1g53070 precursor [F8L10.7]	Legume lectin family protein				AT1G55390		Cysteine/Histidine-rich C1 domain family protein				AT3G20830	Serine/threonine-protein kinase UCNL (EC 2.7.11.1) (AGC serine/threonine-protein kinase subfamily 2 member 4) (Protein UNICORN-LIKE) [UCNL] [AGC2-4] [MOE17.14]	AGC (cAMP-dependent, cGMP-dependent and protein kinase C) kinase family protein	AT2G46310	Ethylene-responsive transcription factor CRF5 (Protein CYTOKININ RESPONSE FACTOR 5) [CRF5] [ERF068] [T3F17.4]	cytokinin response factor 5	AT2G37210	Cytokinin riboside 5'-monophosphate phosphoribohydrolase LOG3 (EC 3.2.2.n1) (Protein LONELY GUY 3) [LOG3] [T2N18.3]	lysine decarboxylase family protein
AT1G63840		RING/U-box superfamily protein	AT1G22990	Heavy metal-associated isoprenylated plant protein 22 precursor (AtHIP22) (AtHIPP22) (Farnesylated protein 7) (AtFP7) [HIPP22] [FP7] [F19G10.25]	Heavy metal transport/detoxification superfamily protein	AT1G53163						AT1G56600	Galactinol synthase 2 (EC 2.4.1.123) (AtGolS2) (GolS-2) [GOLS2] [F25P12.95]	galactinol synthase 2				AT3G21420		2-oxoglutarate (2OG) and Fe(II)-dependent oxygenase superfamily protein	AT2G46570	Laccase-6 precursor (EC 1.10.3.2) (Benzenediol:oxygen oxidoreductase 6) (Diphenol oxidase 6) (Urishiol oxidase 6) [LAC6] [F13A10.10]	laccase 6	AT2G39370	Probable membrane-associated kinase regulator 4 [MAKR4] [F12L6.3]
AT1G64405			AT1G23000	Heavy metal-associated isoprenylated plant protein 37 precursor (AtHIP37) [HIPP37] [F19G10.6]	Heavy metal transport/detoxification superfamily protein	AT1G54020	GDSL esterase/lipase At1g54020 precursor (EC 3.1.1.-) (Extracellular lipase At1g54020) [F15I1.10]	GDSL-like Lipase/Acylhydrolase superfamily protein				AT1G62150		Mitochondrial transcription termination factor family protein				AT3G22820	EPIDERMAL PATTERNING FACTOR-like protein 5 precursor (EPF-like protein 5) [Contains: CHALLAH-LIKE1] [EPFL5] [CLL1] [MWI23.19]	allergen-related	AT2G47230	DUF724 domain-containing protein 6 (AtDUF6) [DUF6]	DOMAIN OF UNKNOWN FUNCTION 724 6	AT2G41170	F-box protein At2g41170 [T3K9.6]	F-box family protein
AT1G65840	Probable polyamine oxidase 4 (EC 1.5.3.16) (AtPAO4) (Amine oxidase 2) [PAO4] [F1E22.18]	polyamine oxidase 4	AT1G23010	Multicopper oxidase LPR1 precursor (EC 1.-.-.-) (Protein LOW PHOSPHATE ROOT 1) [LPR1] [F19G10.5]	Cupredoxin superfamily protein	AT1G55910	Zinc transporter 11 precursor (ZRT/IRT-like protein 11) [ZIP11] [F14J16.16]	zinc transporter 11 precursor				AT1G62280	S-type anion channel SLAH1 (SLAC1-homolog protein 1) [SLAH1] [F19K23.20]	SLAC1 homologue 1				AT3G23030	Auxin-responsive protein IAA2 (Indoleacetic acid-induced protein 2) [IAA2] [MXC7.6]	indole-3-acetic acid inducible 2	AT3G02000	Glutaredoxin-C7 (AtGrxC7) (Protein ROXY 1) [GRXC7] [AT.I.24-1] [ROXY1] [F1C9.22] [F28J7.33]	Thioredoxin superfamily protein	AT2G41510	Cytokinin dehydrogenase 1 precursor (EC 1.5.99.12) (Cytokinin oxidase 1) (AtCKX1) (CKO 1) [CKX1] [T32G6.3]	cytokinin oxidase/dehydrogenase 1
AT1G65920		Regulator of chromosome condensation (RCC1) family with FYVE zinc finger domain	AT1G23060			AT1G58007						AT1G62700	NAC domain-containing protein 26 (ANAC026) (Protein VASCULAR RELATED NAC-DOMAIN 5) [NAC026] [VND5] [F23N19.6]	Arabidopsis NAC domain containing protein 26				AT3G23175		HR-like lesion-inducing protein-related	AT3G05140	Receptor-like cytosolic serine/threonine-protein kinase RBK2 (EC 2.7.11.1) (Protein ROP BINDING PROTEIN KINASES 2) [RBK2] [T12H1.10]	ROP binding protein kinases 2	AT2G41820	Leucine-rich repeat receptor-like tyrosine-protein kinase PXC3 precursor (EC 2.7.10.1) (Protein PXY/TDR-CORRELATED 3) [PXC3] [T11A7.8]	Leucine-rich repeat protein kinase family protein
AT1G67900	BTB/POZ domain-containing protein At1g67900 [T23K23.25]	Phototropic-responsive NPH3 family protein	AT1G23080	Auxin efflux carrier component 7 (AtPIN7) [PIN7] [AEH1] [T26J12.14]	Auxin efflux carrier family protein	AT1G58340	Protein DETOXIFICATION 48 (AtDTX48) (Multidrug and toxic compound extrusion protein 48) (MATE protein 48) (Protein ABNORMAL SHOOT 4) (Protein BUSH-AND-CHLOROTIC-DWARF 1)(Protein BCD1) (Protein ZRIZI) [DTX48] [ABS4] [BCD1] [ZF14] [ZRZ] [F19C14.5]	MATE efflux family protein				AT1G63410	Protein LURP-one-related 4 [F2K11.21]	Protein of unknown function (DUF567)				AT3G25900	Homocysteine S-methyltransferase 1 (EC 2.1.1.10) (S-methylmethionine:homocysteine methyltransferase 1) (AtHMT-1) (SMM:Hcy S-methyltransferase 1) [HMT-1] [MPE11.5] [MPE11.6]	Homocysteine S-methyltransferase family protein	AT3G13000		Protein of unknown function, DUF547	AT2G42380	Basic leucine zipper 34 (AtbZIP34) (bZIP protein 34) [BZIP34] [MHK10.10]	Basic-leucine zipper (bZIP) transcription factor family protein
AT1G68620	Probable carboxylesterase 6 (AtCXE6) (EC 3.1.1.1) [CXE6] [F24J5.14]	alpha/beta-Hydrolases superfamily protein	AT1G23340		Protein of Unknown Function (DUF239)	AT1G59740	Protein NRT1/ PTR FAMILY 4.3 (AtNPF4.3) (Nitrate transporter 1.14) [NPF4.3] [NRT1.14] [F23H11.6]	Major facilitator superfamily protein				AT1G64640		early nodulin-like protein 8				AT3G49110	Peroxidase 33 precursor (EC 1.11.1.7) (Atperox P33) (ATPCa) (Neutral peroxidase C) (PERC) [PER33] [P33] [PRXCA] [F2K15.4] [T2J13.50]	peroxidase CA	AT3G15680		Ran BP2/NZF zinc finger-like superfamily protein	AT2G44990	Carotenoid cleavage dioxygenase 7, chloroplastic precursor (AtCCD7) (AtNCED7) (Beta,beta-carotene 9',10'-oxygenase) (EC 1.13.11.68) (Protein MORE AXILLARY BRANCHING 3) (Protein MORE AXILLARY GROWTH 3) [CCD7] [MAX3] [NCED7] [T14P1.21]	carotenoid cleavage dioxygenase 7
AT1G70560	L-tryptophan--pyruvate aminotransferase 1 (EC 2.6.1.27) (EC 2.6.1.99) (Protein CYTOKININ INDUCED ROOT CURLING 1) (Protein SHADE AVOIDANCE 3) (Protein TRANSPORT INHIBITORRESPONSE 2) (Protein TRYPTOPHAN AMINOTRANSFERASE OF ARABIDOPSIS 1) (Protein WEAK ETHYLENE INSENSITIVE 8) (Tryptophan transaminase) [TAA1] [CKRC1] [SAV3] [TIR2] [WEI8] [F24J13.13] [F5A18.26]	tryptophan aminotransferase of Arabidopsis 1	AT1G23350		Plant invertase/pectin methylesterase inhibitor superfamily protein	AT1G60750	Probable aldo-keto reductase 6 (EC 1.1.1.-) [F8A5.26]	NAD(P)-linked oxidoreductase superfamily protein				AT1G67265	Small polypeptide DEVIL 3 (Small polypeptide ROTUNDIFOLIA LIKE 21) (Small polypeptide ROT-FOUR-LIKE 21) [DVL3] [RTFL21] [F1N21]	ROTUNDIFOLIA like 21				AT3G49220	Probable pectinesterase/pectinesterase inhibitor 34 [Includes: Pectinesterase inhibitor 34 (Pectin methylesterase inhibitor 34); Pectinesterase 34 (EC 3.1.1.11) (PE 34)(Pectin methylesterase 34) (AtPME34)] [PME34] [ARATH34] [F2K15.80]	Plant invertase/pectin methylesterase inhibitor superfamily	AT3G18610	Nucleolin 2 (Protein NUCLEOLIN LIKE 2) (AtNUC-L2) (Protein PARALLEL LIKE 1) (AtPARLL1) [NUCL2] [PARLL1] [K24M9.11]	nucleolin like 2	AT2G47130	Short-chain dehydrogenase reductase 3a (EC 1.1.1.-) (AtSDR3a) [SDR3a] [SDR3] [SDR4] [F14M4]	NAD(P)-binding Rossmann-fold superfamily protein
AT1G70920	Homeobox-leucine zipper protein ATHB-X (HD-ZIP protein ATHB-X) (Homeodomain transcription factor ATHB-X) [ATHB-X] [F15H11_25]	homeobox-leucine zipper protein 18	AT1G25209			AT1G61255						AT1G67340	F-box protein At1g67340 [F1N21.16]	HCP-like superfamily protein with MYND-type zinc finger				AT3G51410		Arabidopsis protein of unknown function (DUF241)	AT3G19300		Protein kinase superfamily protein	AT2G47860	BTB/POZ domain-containing protein SETH6 [SETH6] [F17A22.25]	Phototropic-responsive NPH3 family protein
AT1G70940	Auxin efflux carrier component 3 (AtPIN3) [PIN3] [F15H11.14]	Auxin efflux carrier family protein	AT1G25510		Eukaryotic aspartyl protease family protein	AT1G63420		Arabidopsis thaliana protein of unknown function (DUF821)				AT1G67400		ELMO/CED-12 family protein				AT3G55720		Protein of unknown function (DUF620)	AT3G23635	Small polypeptide DEVIL 23 (Small polypeptide ROTUNDIFOLIA LIKE 13) (Small polypeptide ROT-FOUR-LIKE 13) [DVL23] [RTFL13] [MDB19]	ROTUNDIFOLIA like 13	AT3G02170	Protein LONGIFOLIA 2 (Protein TON1 RECRUITING MOTIF 1) [LNG2] [TRM1] [F14P3.18] [F1C9.4]	longifolia2
AT1G73590	Auxin efflux carrier component 1 (Protein PIN-FORMED) (AtPIN1) [PIN1] [F6D5.2]	Auxin efflux carrier family protein	AT1G26770	Expansin-A10 precursor (AtEXPA10) (Alpha-expansin-10) (At-EXP10) (AtEx10) (Ath-ExpAlpha-1.1) [EXPA10] [EXP10] [T24P13.15] [T24P13_14]	expansin A10	AT1G64625	Transcription factor bHLH157 (BHLH transcription factor epsilon) (bHLH epsilon) (Basic helix-loop-helix protein 157) (AtbHLH157) (bHLH 157) (LONESOME HIGHWAY-like protein 2) (bHLH transcription factor bHLH157) [BHLH157] [F1N19]	Serine/threonine-protein kinase WNK (With No Lysine)-related				AT1G68330						AT3G55740	Proline transporter 2 (AtPROT2) [PROT2] [F1I16.150]	proline transporter 2	AT3G26750			AT3G03820	SAUR29	SAUR-like auxin-responsive protein family
AT1G74110		cytochrome P450, family 78, subfamily A, polypeptide 10	AT1G26945	Transcription factor PRE6 (Basic helix-loop-helix protein 163) (AtbHLH163) (bHLH 163) (Protein KIDARI) (Protein PACLOBUTRAZOL RESISTANCE 6) (bHLH transcription factor bHLH163) [PRE6] [BHLH163] [KDR] [T2P11]	basic helix-loop-helix (bHLH) DNA-binding superfamily protein	AT1G64670	Probable lysophospholipase BODYGUARD 1 precursor (EC 3.1.1.-) (AtBDG1) (Protein 9-cis epoxycarotenoid dioxygenase defective 1) (Protein COOL BREATH 5) [BDG1] [BDG] [CB5][CED1] [F1N19.24]	alpha/beta-Hydrolases superfamily protein				AT1G68780		RNI-like superfamily protein				AT4G04710	Calcium-dependent protein kinase 22 (EC 2.7.11.1) [CPK22] [T4B21.12]	calcium-dependent protein kinase 22	AT3G28857	Transcription factor PRE5 (Basic helix-loop-helix protein 164) (AtbHLH164) (bHLH 164) (Protein PACLOBUTRAZOL RESISTANCE 5) (bHLH transcription factor bHLH164) [PRE5] [BHLH164] [MLD15.1]	basic helix-loop-helix (bHLH) DNA-binding family protein	AT3G03830	SAUR28	SAUR-like auxin-responsive protein family
AT1G75450	Cytokinin dehydrogenase 5 precursor (EC 1.5.99.12) (Cytokinin oxidase 5) (AtCKX5) (AtCKX6) (CKO5) [CKX5] [CKX6] [F1B16.2]	cytokinin oxidase 5	AT1G26960	Homeobox-leucine zipper protein ATHB-23 (HD-ZIP protein ATHB-23) (Homeodomain transcription factor ATHB-23) [ATHB-23] [T2P11.15]	homeobox protein 23	AT1G65060	4-coumarate--CoA ligase 3 (EC 6.2.1.12) (4CL 3) (4-coumarate--CoA ligase isoform 3) (At4CL3) (4-coumaroyl-CoA synthase 3) [4CL3] [F16G16.6]	4-coumarate:CoA ligase 3				AT1G68810	Transcription factor bHLH30 (Basic helix-loop-helix protein 30) (AtbHLH30) (bHLH 30) (Transcription factor EN 53) (bHLH transcription factor bHLH030) [BHLH30] [EN53] [F14K14.8] [T6L1.1]	basic helix-loop-helix (bHLH) DNA-binding superfamily protein				AT4G08040	1-aminocyclopropane-1-carboxylate synthase 11 (EC 4.4.1.14) (ACC synthase 11) (S-adenosyl-L-methionine methylthioadenosine-lyase 11) [ACS11] [T17A2.2]	1-aminocyclopropane-1-carboxylate synthase 11	AT3G44350	Putative NAC domain-containing protein 61 (ANAC061) [NAC061] [T22K7.30]	NAC domain containing protein 61	AT3G03840	SAUR27	SAUR-like auxin-responsive protein family
AT1G75490	Dehydration-responsive element-binding protein 2D (Protein DREB2D) [DREB2D] [ERF049] [F10A5.29]	Integrase-type DNA-binding superfamily protein	AT1G27210	TORTIFOLIA1-like protein 4 [TOR1L4] [F17L21.1] [T7N9.27]	ARM repeat superfamily protein	AT1G65920		Regulator of chromosome condensation (RCC1) family with FYVE zinc finger domain				AT1G69150		Cysteine/Histidine-rich C1 domain family protein				AT4G11990		Cell cycle regulated microtubule associated protein	AT3G48970	Heavy metal-associated isoprenylated plant protein 31 precursor (AtHIP31) [HIPP31] [T2J13.190]	Heavy metal transport/detoxification superfamily protein	AT3G03850	SAUR26	SAUR-like auxin-responsive protein family
AT1G78100	F-box protein AUF1 (F-box protein At1g78100) (Protein AUXIN UP-REGULATED F-BOX PROTEIN 1) [AUF1] [T11I11.4]	F-box family protein	AT1G28130	Indole-3-acetic acid-amido synthetase GH3.17 (EC 6.3.2.-) (Auxin-responsive GH3-like protein 17) (AtGH3-17) [GH3.17] [F13K9.22] [F3H9.21] [F3H9_19]	Auxin-responsive GH3 family protein	AT1G66940		protein kinase-related				AT1G69530	Expansin-A1 precursor (AtEXPA1) (Alpha-expansin-1) (At-EXP1) (AtEx1) (Ath-ExpAlpha-1.2) [EXPA1] [EXP1] [F10D13_18]	expansin A1				AT4G13130		Cysteine/Histidine-rich C1 domain family protein	AT3G49700	1-aminocyclopropane-1-carboxylate synthase 9 (EC 4.4.1.14) (ACC synthase 9) (Ethylene-overproduction protein 3) (S-adenosyl-L-methionine methylthioadenosine-lyase 9) [ACS9] [ETO3] [T16K5.50]	1-aminocyclopropane-1-carboxylate synthase 9	AT3G06370	Sodium/hydrogen exchanger 3 (Na(+)/H(+) exchanger 3) (NHE-3) [NHX3] [F24P17.16]	sodium hydrogen exchanger 4
AT1G79760		downstream target of AGL15-4	AT1G29020		Calcium-binding EF-hand family protein	AT1G67900	BTB/POZ domain-containing protein At1g67900 [T23K23.25]	Phototropic-responsive NPH3 family protein				AT1G70950	Protein WVD2-like 7 [WDL7] [F15H11.15]	TPX2 (targeting protein for Xklp2) protein family				AT4G19460		UDP-Glycosyltransferase superfamily protein	AT3G50750	BES1/BZR1 homolog protein 1 [BEH1] [F18B3.30] [T3A5.130]	BES1/BZR1 homolog 1	AT3G12670		CTP synthase family protein
AT1G80240		Protein of unknown function, DUF642	AT1G29160	Dof zinc finger protein DOF1.5 (AtDOF1.5) [DOF1.5] [COG1] [F28N24.35]	Dof-type zinc finger DNA-binding family protein	AT1G68620	Probable carboxylesterase 6 (AtCXE6) (EC 3.1.1.1) [CXE6] [F24J5.14]	alpha/beta-Hydrolases superfamily protein				AT1G73550	Non-specific lipid transfer protein GPI-anchored 8 precursor (AtLTPG-8) (Protein LTP-GPI-ANCHORED 8) [LTPG8] [F6D5.6] [T9L24.29]	Bifunctional inhibitor/lipid-transfer protein/seed storage 2S albumin superfamily protein				AT4G21200	Gibberellin 2-beta-dioxygenase 8 (EC 1.14.11.13) (GA 2-oxidase 8) (Gibberellin 2-beta-hydroxylase 8) (Gibberellin 2-oxidase 8) [GA2OX8] [F7J7.140]	gibberellin 2-oxidase 8	AT3G51670	Patellin-6 [PATL6] [T18N14.50]	SEC14 cytosolic factor family protein / phosphoglyceride transfer family protein	AT3G14362	Small polypeptide DEVIL 19 (Small polypeptide ROTUNDIFOLIA LIKE 10) (Small polypeptide ROT-FOUR-LIKE 10) [DVL19] [RTFL10] [MLN21]	ROTUNDIFOLIA like 10
AT2G01430	Homeobox-leucine zipper protein ATHB-17 (HD-ZIP protein ATHB-17) (Homeodomain transcription factor ATHB-17) [ATHB-17] [F2I9.5]	homeobox-leucine zipper protein 17	AT1G29290	Precursor of CEP14 precursor (PCEP14) [Contains: C-terminally encoded peptide 14 (CEP14)] [CEP14] [F28N24.30]		AT1G68640	Transcription factor PERIANTHIA (bZIP transcription factor 46) (AtbZIP46) [PAN] [F24J5.12]	bZIP transcription factor family protein				AT1G73570	ERAD-associated E3 ubiquitin-protein ligase component HRD3B precursor (AtSel1B) [HRD3B] [F6D5.4] [T9L24.27]	HCP-like superfamily protein				AT4G22530		S-adenosyl-L-methionine-dependent methyltransferases superfamily protein	AT3G60960	Pentatricopeptide repeat-containing protein At3g60960, mitochondrial precursor [T27I15_50]	Tetratricopeptide repeat (TPR)-like superfamily protein	AT3G14370	Serine/threonine-protein kinase WAG2 (EC 2.7.11.1) [WAG2] [MLN21.15]	Protein kinase superfamily protein
AT2G03830	Protein GOLVEN 6 precursor (CLAVATA3/ESR (CLE)-related protein CLEL2) (CLE-Like protein 2) (Root meristem growth factor 8) (AtRGF8) [Contains: GLV6p] [GLV6] [CLEL2] [RGF8] [T18C20.3]		AT1G29420	SAUR61	SAUR-like auxin-responsive protein family	AT1G70550		Protein of Unknown Function (DUF239)				AT1G74420	Fucosyltransferase 3 (EC 2.4.1.-) (AtFUT3) [FUT3] [F1M20.10]	fucosyltransferase 3				AT4G22620	SAUR34	SAUR-like auxin-responsive protein family	AT3G62050		Putative endonuclease or glycosyl hydrolase	AT3G14560
AT2G04090	Protein DETOXIFICATION 5 (AtDTX5) (Multidrug and toxic compound extrusion protein 5) (MATE protein 5) [DTX5] [F3L12.8]	MATE efflux family protein	AT1G29430	SAUR62	SAUR-like auxin-responsive protein family	AT1G70910		RING/U-box superfamily protein				AT1G74670	Gibberellin-regulated protein 6 precursor (GAST1 protein homolog 6) [GASA6] [F1M20.35]	Gibberellin-regulated family protein				AT4G22810	AT-hook motif nuclear-localized protein 24 [AHL24] [T12H17.200]	Predicted AT-hook DNA-binding family protein	AT3G62070			AT3G15540	Auxin-responsive protein IAA19 (Indoleacetic acid-induced protein 19) (Protein MASSUGU 2) [IAA19] [MSG2] [MJK13.20]	indole-3-acetic acid inducible 19
AT2G14820	BTB/POZ domain-containing protein NPY2 (Protein NAKED PINS IN YUC MUTANTS 2) [NPY2] [F26C24.4]	Phototropic-responsive NPH3 family protein	AT1G29440	SAUR63	SAUR-like auxin-responsive protein family	AT1G70920	Homeobox-leucine zipper protein ATHB-X (HD-ZIP protein ATHB-X) (Homeodomain transcription factor ATHB-X) [ATHB-X] [F15H11_25]	homeobox-leucine zipper protein 18				AT1G75080	Protein BRASSINAZOLE-RESISTANT 1 (Protein BIN2 SUBSTRATE 2) [BZR1] [BIS2] [F9E10_7]	Brassinosteroid signalling positive regulator (BZR1) family protein				AT4G25410	Transcription factor bHLH126 (Basic helix-loop-helix protein 126) (AtbHLH126) (bHLH 126) (Transcription factor EN 3) (bHLH transcription factor bHLH126) [BHLH126] [EN3][T30C3.80]	basic helix-loop-helix (bHLH) DNA-binding superfamily protein	AT3G63445		other RNA	AT3G25710	Transcription factor AIG1 (AtAIG1) (Basic helix-loop-helix protein 32) (AtbHLH32) (bHLH 32) (Protein TARGET OF MOOPTEROS 5) (Transcription factor EN 54) (bHLH transcription factor bHLH032) [BHLH32] [EN54] [TMO5] [K13N2.1]	basic helix-loop-helix 32
AT2G14960	Probable indole-3-acetic acid-amido synthetase GH3.1 (EC 6.3.2.-) (Auxin-responsive GH3-like protein 1) (AtGH3-1) [GH3.1] [T26I20.12]	Auxin-responsive GH3 family protein	AT1G29450	SAUR64	SAUR-like auxin-responsive protein family	AT1G70940	Auxin efflux carrier component 3 (AtPIN3) [PIN3] [F15H11.14]	Auxin efflux carrier family protein				AT1G75500	Protein WALLS ARE THIN 1 [WAT1] [F10A5.28] [F1B16.19]	Walls Are Thin 1				AT4G28490	Receptor-like protein kinase 5 precursor (EC 2.7.10.1) (EC 2.7.11.1) (Protein HAESA) [RLK5] [HAE] [F21O9.180]	Leucine-rich receptor-like protein kinase family protein	AT3G63510		FMN-linked oxidoreductases superfamily protein	AT3G25717	Small polypeptide DEVIL 6 (Small polypeptide ROTUNDIFOLIA LIKE 16) (Small polypeptide ROT-FOUR-LIKE 16) [DVL6] [RTFL16] [K13N2]	ROTUNDIFOLIA like 16
AT2G17080		Arabidopsis protein of unknown function (DUF241)	AT1G29460	SAUR65	SAUR-like auxin-responsive protein family	AT1G71380	Endoglucanase 9 precursor (EC 3.2.1.4) (Cellulase 3) (AtCEL3) (Endo-1,4-beta glucanase 9) [CEL3] [F26A9.24]	cellulase 3				AT1G76240		Arabidopsis protein of unknown function (DUF241)				AT4G32880	Homeobox-leucine zipper protein ATHB-8 (HD-ZIP protein ATHB-8) (Homeodomain transcription factor ATHB-8) [ATHB-8] [HB8] [T16I18.90]	homeobox gene 8	AT4G00480	Transcription factor MYC1 (AtMYC1) (Basic helix-loop-helix protein 12) (AtbHLH12) (bHLH 12) (Transcription factor EN 58) (bHLH transcription factor bHLH012) [BHLH12] [EN58] [MYC1] [F6N23.22]	basic helix-loop-helix (bHLH) DNA-binding superfamily protein	AT3G26760		NAD(P)-binding Rossmann-fold superfamily protein
AT2G21050	Auxin transporter-like protein 2 (AUX1-like protein 2) [LAX2] [F26H11.19]	like AUXIN RESISTANT 2	AT1G29465			AT1G72230		Cupredoxin superfamily protein				AT1G77400						AT4G35200		Arabidopsis protein of unknown function (DUF241)	AT4G03270	Putative cyclin-D6-1 (G1/S-specific cyclin-D6-1) (CycD6;1) [CYCD6-1] [F4C21.20]	Cyclin D6;1	AT3G27500		Cysteine/Histidine-rich C1 domain family protein
AT2G22800	Homeobox-leucine zipper protein HAT9 (Homeodomain-leucine zipper protein HAT9) (HD-ZIP protein 9) [HAT9] [T20K9.1] [T30L20.6]	Homeobox-leucine zipper protein family	AT1G29490	SAUR68	SAUR-like auxin-responsive protein family	AT1G73590	Auxin efflux carrier component 1 (Protein PIN-FORMED) (AtPIN1) [PIN1] [F6D5.2]	Auxin efflux carrier family protein				AT1G78440	Gibberellin 2-beta-dioxygenase 1 (EC 1.14.11.13) (GA 2-oxidase 1) (Gibberellin 2-beta-hydroxylase 1) (Gibberellin 2-oxidase 1) [GA2OX1] [F3F9.5]	Arabidopsis thaliana gibberellin 2-oxidase 1				AT4G39390	UDP-rhamnose/UDP-galactose transporter 4 (UDP-Rha/UDP-Gal transporter 4) (Bi-functional UDP-rhamnose/UDP-galactose transporter) (Nucleotide sugar transporter-KT 1) (AtNST-KT1) [URGT4] [NST-KT1] [F23K16.20]	nucleotide sugar transporter-KT 1	AT4G10150	RING-H2 finger protein ATL7 (EC 2.3.2.27) (RING-type E3 ubiquitin transferase ATL7) [ATL7] [F28M11.70] [T9A4.19]	RING/U-box superfamily protein	AT3G28420		Putative membrane lipoprotein
AT2G22810	1-aminocyclopropane-1-carboxylate synthase 4 (EC 4.4.1.14) (ACC synthase 4) (S-adenosyl-L-methionine methylthioadenosine-lyase 4) [ACS4] [ACC4] [T20K9.2]	1-aminocyclopropane-1-carboxylate synthase 4	AT1G29500	SAUR66	SAUR-like auxin-responsive protein family	AT1G73830	Transcription factor BEE 3 (Basic helix-loop-helix protein 50) (AtbHLH50) (bHLH 50) (Protein Brassinosteroid enhanced expression 3) (Transcription factor EN 76) (bHLH transcription factor bHLH050) [BEE3] [BHLH50] [EN76] [F25P22.25]	BR enhanced expression 3				AT1G78865						AT4G39403	Peptide POLARIS (Protein expressed in embryo 101) (AtEM101) [PLS] [EM101] [F23K16]	polaris	AT4G11950		Protein of unknown function (DUF1191)	AT3G28455	CLAVATA3/ESR (CLE)-related protein 25 precursor [Contains: CLE25p] [CLE25] [MFJ20]	CLAVATA3/ESR-RELATED 25
AT2G22830	Squalene epoxidase 2, mitochondrial precursor (EC 1.14.14.17) (AtSQE2) [SQE2] [T20K9.4]	squalene epoxidase 2	AT1G29510	SAUR67	SAUR-like auxin-responsive protein family	AT1G74110		cytochrome P450, family 78, subfamily A, polypeptide 10				AT1G78970	Lupeol synthase 1 (EC 4.2.1.128) (EC 5.4.99.41) (AtLUP1) (Lupan-3-beta,20-diol synthase) [LUP1] [YUP8H12R.28] [YUP8H12R.42]	lupeol synthase 1				AT5G03150	Zinc finger protein JACKDAW (ID1-like zinc finger protein 3) (Protein indeterminate-domain 10) [JKD] [IDD10] [IDZ3] [F15A17.180] [MOK16.6]	C2H2-like zinc finger protein	AT4G12410	SAUR35	SAUR-like auxin-responsive protein family	AT3G29370
AT2G23170	Indole-3-acetic acid-amido synthetase GH3.3 (EC 6.3.2.-) (Auxin-responsive GH3-like protein 3) (AtGH3-3) [GH3.3] [T20D16.20]	Auxin-responsive GH3 family protein	AT1G29660	GDSL esterase/lipase At1g29660 precursor (EC 3.1.1.-) (Apoplastic EDS1-dependent protein 3) (Extracellular lipase At1g29660) [F15D2.21]	GDSL-like Lipase/Acylhydrolase superfamily protein	AT1G75240	Zinc-finger homeodomain protein 5 (AtZHD5) (Homeobox protein 33) (AtHB-33) [ZHD5] [HB33] [F22H5.4]	homeobox protein 33				AT1G80100	Pseudo histidine-containing phosphotransfer protein 6 (Histidine-containing phosphotransfer protein 6) [AHP6] [AHP6b] [F18B13.18]	histidine phosphotransfer protein 6				AT5G06839	Transcription factor TGA10 (Protein TGACG (TGA) motif-binding protein 10) (bZIP transcription factor 65) (AtbZIP65) [TGA10] [BZIP65] [MOJ9.1]	bZIP transcription factor family protein	AT4G14819		Protein of unknown function (DUF1677)	AT3G42800	Protein BIG GRAIN 1-like C [T21C14.20]
AT2G23180		cytochrome P450, family 96, subfamily A, polypeptide 1	AT1G30100	Probable 9-cis-epoxycarotenoid dioxygenase NCED5, chloroplastic precursor (EC 1.13.11.51) (AtNCED5) [NCED5] [T2H7.10]	nine-cis-epoxycarotenoid dioxygenase 5	AT1G75640		Leucine-rich receptor-like protein kinase family protein				AT1G80270	Pentatricopeptide repeat-containing protein At1g80270, mitochondrial precursor [F5I6.2]	PENTATRICOPEPTIDE REPEAT 596				AT5G10520	Receptor-like cytosolic serine/threonine-protein kinase RBK1 (EC 2.7.11.1) (Protein ROP BINDING PROTEIN KINASES 1) [RBK1] [F12B17.130]	ROP binding protein kinases 1	AT4G17980	NAC domain-containing protein 71 (ANAC071) [NAC071]	NAC domain containing protein 71	AT3G50340
AT2G26560	Patatin-like protein 2 (EC 3.1.1.-) (AtPLP2) (Patatin-related phospholipase A IIalpha) (pPLAIIa) (Phospholipase A IIA) (AtPLAIIA) [PLP2] [T9J22.23]	phospholipase A 2A	AT1G30190			AT1G76610		Protein of unknown function, DUF617				AT1G80280		alpha/beta-Hydrolases superfamily protein				AT5G17390		Adenine nucleotide alpha hydrolases-like superfamily protein	AT4G20230	Terpenoid synthase 9 (EC 4.2.3.-) (AtTPS09) [TPS09] [F1C12.150]	Terpenoid cyclases/Protein prenyltransferases superfamily protein	AT3G50890	Zinc-finger homeodomain protein 7 (AtZHD7) (Homeobox protein 28) (AtHB-28) [ZHD7] [HB28] [F18B3.170]	homeobox protein 28
AT2G26710	Cytochrome P450 734A1 (EC 1.14.-.-) (Protein PHYB ACTIVATION-TAGGED SUPPRESSOR 1) [CYP734A1] [BAS1] [F18A8.8]	Cytochrome P450 superfamily protein	AT1G30570	Probable receptor-like protein kinase At1g30570 precursor (EC 2.7.11.-) [T5I8.2]	hercules receptor kinase 2	AT1G77110	Auxin efflux carrier component 6 (AtPIN6) [PIN6] [F22K20.18]	Auxin efflux carrier family protein				AT2G01150	E3 ubiquitin-protein ligase RHA2B (EC 2.3.2.27) (RING-H2 finger A2b) (RING-H2 zinc finger protein RHA2b) (RING-type E3 ubiquitin transferase RHA2B) [RHA2B] [F10A8.3]	RING-H2 finger protein 2B				AT5G17490	DELLA protein RGL3 (GRAS family protein 27) (AtGRAS-27) (RGA-like protein 3) [RGL3] [K3M16.60]	RGA-like protein 3	AT4G21745	CRIB domain-containing protein RIC11 (ROP-interactive CRIB motif-containing protein 11) (Target of ROP protein RIC11) [RIC11] [F17L22]	PAK-box/P21-Rho-binding family protein	AT3G53450	Cytokinin riboside 5'-monophosphate phosphoribohydrolase LOG4 (EC 3.2.2.n1) (Protein LONELY GUY 4) [LOG4] [F4P12.150]	Putative lysine decarboxylase family protein
AT2G27000		cytochrome P450, family 705, subfamily A, polypeptide 8	AT1G30820		CTP synthase family protein	AT1G78100	F-box protein AUF1 (F-box protein At1g78100) (Protein AUXIN UP-REGULATED F-BOX PROTEIN 1) [AUF1] [T11I11.4]	F-box family protein				AT2G01420	Auxin efflux carrier component 4 (AtPIN4) [PIN4] [F2I9.4]	Auxin efflux carrier family protein				AT5G18050	SAUR22	SAUR-like auxin-responsive protein family	AT4G23750	Ethylene-responsive transcription factor CRF2 (Protein CYTOKININ RESPONSE FACTOR 2) [CRF2] [ERF064] [F9D16.220]	cytokinin response factor 2	AT3G58120	Basic leucine zipper 61 (AtbZIP61) (bZIP protein 61) [BZIP61] [F9D24.30]	Basic-leucine zipper (bZIP) transcription factor family protein
AT2G28350	Auxin response factor 10 [ARF10] [T1B3.13]	auxin response factor 10	AT1G31320	LOB domain-containing protein 4 (ASYMMETRIC LEAVES 2-like protein 6) (AS2-like protein 6) [LBD4] [ASL6] [T19E23.11]	LOB domain-containing protein 4	AT1G80240		Protein of unknown function, DUF642				AT2G03090	Expansin-A15 precursor (AtEXPA15) (Alpha-expansin-15) (At-EXP15) (AtEx15) (Ath-ExpAlpha-1.3) [EXPA15] [EXP15] [T17M13.26]	expansin A15				AT5G19530	Thermospermine synthase ACAULIS5 (EC 2.5.1.79) [ACL5] [TKV] [T20D1.50]	S-adenosyl-L-methionine-dependent methyltransferases superfamily protein	AT4G25420	Gibberellin 20 oxidase 1 (EC 1.14.11.-) (GA 20-oxidase 1) (AtGA20ox1) (Gibberellin C-20 oxidase 1) [GA20OX1] [20ox1] [At2301] [GA5] [T30C3.90]	2-oxoglutarate (2OG) and Fe(II)-dependent oxygenase superfamily protein	AT3G58190	LOB domain-containing protein 29 (ASYMMETRIC LEAVES 2-like protein 16) (AS2-like protein 16) [LBD29] [ASL16] [F9D24.100]	lateral organ boundaries-domain 29
AT2G29980	Acyl-lipid omega-3 desaturase (cytochrome b5), endoplasmic reticulum (EC 1.14.19.25) (Omega-3 fatty acid desaturase 3, endoplasmic reticulum) [FAD3] [F23F1.10]	fatty acid desaturase 3	AT1G31880	Protein BREVIS RADIX (AtBRX) [BRX] [F5M6.11]	DZC (Disease resistance/zinc finger/chromosome condensation-like region) domain containing protein	AT2G01200	Auxin-responsive protein IAA32 (Indoleacetic acid-induced protein 32) [IAA32] [F10A8.8]	indole-3-acetic acid inducible 32				AT2G15490	UDP-glycosyltransferase 73B4 (EC 2.4.1.-) (Flavonol 3-O-glucosyltransferase UGT73B4) (EC 2.4.1.91) [UGT73B4] [F9O13.4]	UDP-glycosyltransferase 73B4				AT5G20820	SAUR76	SAUR-like auxin-responsive protein family	AT4G27240		zinc finger (C2H2 type) family protein	AT3G59900	Protein AUXIN-REGULATED GENE INVOLVED IN ORGAN SIZE (AtARGOS) [ARGOS] [F24G16.170]	auxin-regulated gene involved in organ size
AT2G30040		mitogen-activated protein kinase kinase kinase 14	AT1G31885	Aquaporin NIP3-1 (NOD26-like intrinsic protein 3-1) (AtNIP3;1) [NIP3-1] [F5M6.28]	NOD26-like intrinsic protein 3;1	AT2G01430	Homeobox-leucine zipper protein ATHB-17 (HD-ZIP protein ATHB-17) (Homeodomain transcription factor ATHB-17) [ATHB-17] [F2I9.5]	homeobox-leucine zipper protein 17				AT2G18000	Transcription initiation factor TFIID subunit 14 (Protein AF-9 homolog b) (TBP-associated factor 14) (AtTAF14) [TAF14] [YAF9B] [T27K22.13]	TBP-associated factor 14				AT5G22890	Protein SENSITIVE TO PROTON RHIZOTOXICITY 2 (Zinc finger protein STOP2) [STOP2] [MRN17.12]	C2H2 and C2HC zinc fingers superfamily protein	AT4G27290	G-type lectin S-receptor-like serine/threonine-protein kinase At4g27290 precursor (EC 2.7.11.1) [M4I22.100]	S-locus lectin protein kinase family protein	AT3G60630	Scarecrow-like protein 22 (AtSCL22) (GRAS family protein 21) (AtGRAS-21) (SCL6-III) [SCL22] [T4C21.40]	GRAS family transcription factor
AT2G32100	Transcription repressor OFP16 (Ovate family protein 16) (AtOFP16) [OFP16] [F22D22.15]	ovate family protein 16	AT1G32190		alpha/beta-Hydrolases superfamily protein	AT2G02150	Putative pentatricopeptide repeat-containing protein At2g02150 [F5O4.8]	Tetratricopeptide repeat (TPR)-like superfamily protein				AT2G21200	SAUR7	SAUR-like auxin-responsive protein family				AT5G24320		Transducin/WD40 repeat-like superfamily protein	AT4G28650	MDIS1-interacting receptor like kinase 1 precursor (AtMIK1) (Leucine-rich repeat receptor-like protein kinase PXL2) (EC 2.7.11.1) (Protein PHLOEM INTERCALATED WITH XYLEM-LIKE 2) [MIK1] [PXL2] [T5F17.100]	Leucine-rich repeat transmembrane protein kinase family protein	AT3G60640	Autophagy-related protein 8g precursor (Autophagy-related ubiquitin-like modifier ATG8g) (AtAPG8g) (Protein autophagy 8g) [ATG8G] [APG8G] [T4C21_50]	Ubiquitin-like superfamily protein
AT2G33000		ubiquitin-associated (UBA)/TS-N domain-containing protein-related	AT1G36940			AT2G12462						AT2G22460		Protein of unknown function, DUF617				AT5G25460		Protein of unknown function, DUF642	AT4G29310		Protein of unknown function (DUF1005)	AT3G60650	Root meristem growth factor 10 precursor (AtRGF10) (CLAVATA3/ESR (CLE)-related protein CLELn) (AtCLELn) (Nuclear CLE-Like protein) [Contains: CLELn] [RGF10] [CLELn] [T4C21.60]
AT2G33310	Auxin-responsive protein IAA13 (Indoleacetic acid-induced protein 13) [IAA13] [F4P9.8]	auxin-induced protein 13	AT1G47510	Type IV inositol polyphosphate 5-phosphatase 11 (EC 3.1.3.36) (EC 3.1.3.86) (At5PTase11) [IP5P11] [F16N3.22]	inositol polyphosphate 5-phosphatase 11	AT2G14960	Probable indole-3-acetic acid-amido synthetase GH3.1 (EC 6.3.2.-) (Auxin-responsive GH3-like protein 1) (AtGH3-1) [GH3.1] [T26I20.12]	Auxin-responsive GH3 family protein				AT2G25000	Probable WRKY transcription factor 60 (WRKY DNA-binding protein 60) [WRKY60] [F27C12.8]	WRKY DNA-binding protein 60				AT5G28646	Protein WAVE-DAMPENED 2 (AtWVD2) [WVD2] [F4I4]	TPX2 (targeting protein for Xklp2) protein family	AT4G32780		phosphoinositide binding	AT3G62100	Auxin-responsive protein IAA30 (Indoleacetic acid-induced protein 30) [IAA30] [T17J13.60]	indole-3-acetic acid inducible 30
AT2G34650	Protein kinase PINOID (EC 2.7.11.1) (Protein kinase ABRUPTUS) [PID] [ABR] [T31E10.1]	Protein kinase superfamily protein	AT1G47655	Dof zinc finger protein DOF1.6 (AtDOF1.6) [DOF1.6] [F16N3.5]	Dof-type zinc finger DNA-binding family protein	AT2G18010	SAUR10	SAUR-like auxin-responsive protein family				AT2G25050	Formin-like protein 18 (AtFH18) [FH18] [F27C12.3]	Actin-binding FH2 (Formin Homology) protein				AT5G38200		Class I glutamine amidotransferase-like superfamily protein	AT4G34800	SAUR4	SAUR-like auxin-responsive protein family	AT3G63430
AT2G35600	Protein Brevis radix-like 1 (AtBRXL1) [BRXL1] [T32F12.2]	BREVIS RADIX-like 1	AT1G47860		transposable element gene	AT2G18480	Probable polyol transporter 3 [PLT3] [F24H14.17]	Major facilitator superfamily protein				AT2G25130		ARM repeat superfamily protein				AT5G41280	Cysteine-rich repeat secretory protein 57 precursor [CRRSP57] [K1O13.8]	Receptor-like protein kinase-related family protein	AT4G37890	Probable E3 ubiquitin-protein ligase EDA40 (EC 2.3.2.27) (Protein EMBRYO SAC DEVELOPMENT ARREST 40) (RING-type E3 ubiquitin transferase EDA40) [EDA40] [F20D10.10]	Zinc finger (C3HC4-type RING finger) family protein	AT3G63440	Cytokinin dehydrogenase 6 precursor (EC 1.5.99.12) (Cytokinin oxidase 6) (AtCKX6) (AtCKX7) (CKO6) [CKX6] [CKX7] [MAA21_70]	cytokinin oxidase/dehydrogenase 6
AT2G36220			AT1G48330			AT2G21050	Auxin transporter-like protein 2 (AUX1-like protein 2) [LAX2] [F26H11.19]	like AUXIN RESISTANT 2				AT2G25640		SPOC domain / Transcription elongation factor S-II protein				AT5G48900	Probable pectate lyase 20 precursor (EC 4.2.2.2) [K19E20.1]	Pectin lyase-like superfamily protein	AT4G38860	SAUR16	SAUR-like auxin-responsive protein family	AT4G00050	Transcription factor UNE10 (Basic helix-loop-helix protein 16) (AtbHLH16) (bHLH 16) (Protein UNFERTILIZED EMBRYO SAC 10) (Transcription factor EN 108) (bHLH transcription factor bHLH016) [UNE10] [BHLH16] [EN108] [F6N15.11]	basic helix-loop-helix (bHLH) DNA-binding superfamily protein
[truncated: 548 more rows]

## Sheet: Down-regulated in the light
Auxin down-regulated genes in the light
L5.Down	annotate	Short_description	L50.Down	annotate.1	Short_description.1	L50/L5.Down	annotate.2	Short_description.2	Only.L5.Down	annotate.3	Short_description.3	Only.L50.Down	annotate.4	Short_description.4	Only.L50/L5.Down	annotate.5	Short_description.5	L5.Down.&.L50.Down	annotate.6	Short_description.6	L50.Down.&.L50/L5.Down	annotate.7	Short_description.7	L5.Down.&.L50.Down.&.L50/L5.Down	annotate.8	Short_description.8
[truncated: 557 more rows]
