# Supplementary material for: Apoplastic pH determines the hypocotyl response to auxin dosage and light
Source: Research Square preprint supplement (doi:10.21203/rs.3.rs-3625192/v1), 2023-12-19
Supplement: Supplementary file 3 [file 8bf73a482cd34ab2fbd38081.xlsx]

## Sheet: SAUR family
gene	annotation	Mock-D	5uM-Pic-D	50uM-Pic-D	Mock-L	5uM-Pic-L	50uM-Pic-L
AT4G34770	SAUR1	194.633	469.633	634.833	150.533	465.133	1292.83
AT4G34780	SAUR2	0.633333	1.33333	1	0	0	0
AT4G34790	SAUR3	4.23333	4.26667	4.6	3	5.43333	8.83333
AT4G34800	SAUR4	30.7333	55.1333	61.3333	18.7333	18.4	45.8
AT4G34810	SAUR5	56.2333	49.3	60.0333	184.767	178.5	223.167
AT2G21210	SAUR6	54.7333	138.567	235.9	126.967	131.867	186.5
AT2G21200	SAUR7	9.13333	26.2333	45.3667	12.6333	22.5333	31.4
AT2G16580	SAUR8	9.26667	8.5	15.1333	15.6333	13.4667	16
AT4G36110	SAUR9	296.733	994.067	1548.57	42.3667	222.933	350.033
AT2G18010	SAUR10	42.0333	218.233	545.133	1	6.06667	73.8333
AT5G66260	SAUR11	17.4	78.6	114.9	2.33333	2.03333	0.966667
AT2G21220	SAUR12	4.43333	7.23333	11.3	1	3.66667	6.63333
AT4G38840	SAUR14	35.5333	108.967	265.767	167.867	344.967	714.533
AT4G38850	SAUR15	31.3	238.967	563.667	126.367	494.033	1333.13
AT4G38860	SAUR16	97.0333	142.567	204.767	20.1	28.5	111.4
AT4G09530	SAUR17	13.9333	4.93333	10.5	0	0	0
AT5G18010	SAUR19	51.9667	234.667	544.433	6.43333	28.8333	64.1667
AT5G18020	SAUR20	59.6667	249.7	528.733	44.2333	158.7	388.4
AT5G18030	SAUR21	61.9333	298.2	746.433	49.4333	169.533	493.467
AT5G18050	SAUR22	57.0333	277.933	663	5.43333	31.8333	52.1667
AT5G18060	SAUR23	64.3333	285.5	679.133	7.43333	28.1333	64.8
AT5G18080	SAUR24	109.333	569.9	1309.53	123.467	358	923.233
AT4G13790	SAUR25	77.4	290.167	613.5	0	0.666667	2.73333
AT3G03850	SAUR26	44.0667	238	615.633	63.3	178.367	378.133
AT3G03840	SAUR27	26.1667	152.367	414.767	52.8	169.2	324.567
AT3G03830	SAUR28	18.3333	115.633	320.4	23.1333	82.8	216.667
AT3G03820	SAUR29	14.8	59.6333	129.7	43.4333	121.267	268.333
AT4G00880	SAUR31	71.6333	65.3667	59.6333	618.333	510.667	513.633
AT2G46690	SAUR32	550.9	645.967	604.4	380	351.433	318.767
AT3G61900	SAUR33	30.5333	29.7333	28.3333	17.2	16.5667	12.7333
AT4G22620	SAUR34	206.6	204.2	263.2	54.9333	97.3333	132.267
AT4G12410	SAUR35	347.7	378.133	469.133	51.2333	66.2	119.267
AT2G45210	SAUR36	498.867	597.133	697.5	249	207.667	141.1
AT4G31320	SAUR37	20.8667	14.7	11.6	54.8333	50.0333	28.1667
AT2G24400	SAUR38	5.1	4.26667	4.63333	9.1	7.43333	7.03333
AT1G79130	SAUR40	2.23333	3.93333	2.26667	2.36667	3.36667	0.633333
AT1G16510	SAUR41	107.5	139.633	164.467	104.333	98.6667	114.967
AT2G28085	SAUR42	1.26667	3.63333	1.63333	0	0.333333	0
AT5G42410	SAUR43	4.43333	8.23333	16.8	0.333333	2.7	2.63333
AT5G03310	SAUR44	29.0333	26.2	29.0667	17.7667	13.4333	9.53333
AT2G36210	SAUR45	117.067	102.3	89.7667	16.6667	16.8	9.7
AT2G37030	SAUR46	3.26667	11.5333	9.66667	0	0.333333	0.3
AT3G09870	SAUR48	19.7	15.5	14.7333	15.8333	9.46667	13.1
AT4G34750	SAUR49	74.4333	99.0333	107.6	119	93.7333	116.7
AT4G34760	SAUR50	153.867	651.4	1064.67	134.9	327.3	1040.1
AT1G75580	SAUR51	20.8	29.8333	23.8	18	18.8667	31.8667
AT1G75590	SAUR52	145.133	130.367	142.367	21.4333	35.3	34.3333
AT1G19840	SAUR53	25.0667	23.5667	18.2	19.8	15.4333	14.5
AT1G19830	SAUR54	4.73333	2.63333	3.96667	0.7	1	1.33333
AT5G50760	SAUR55	204.967	182.9	233.5	53.4	63	79.1667
AT1G76190	SAUR56	0	0.633333	0	2.5	3	0.7
AT3G53250	SAUR57	12.3333	13.1	12	0.666667	0.333333	0
AT1G43040	SAUR58	6.46667	7.86667	5.9	4.63333	4.7	2.63333
AT3G60690	SAUR59	253.967	168.2	148.333	507.067	380.4	193.267
AT1G20470	SAUR60	5.13333	8.23333	10.3	17.7	11.8	16.8333
AT1G29420	SAUR61	8.46667	20.3333	59.5667	5.16667	30.8	38.5
AT1G29430	SAUR62	64.9333	413.367	866.533	135.133	438.933	939.333
AT1G29440	SAUR63	35.7667	199.133	464.7	80.8333	260.8	573.467
AT1G29450	SAUR64	58.4333	318.667	684.633	83.4333	310.2	692.667
AT1G29460	SAUR65	29.1667	133.133	365.5	69.2	207.467	545.767
AT1G29500	SAUR66	64	569.9	1129.63	150.167	451.333	947.567
AT1G29510	SAUR67	54.4667	231.1	416.433	109.2	276.4	557.333
AT1G29490	SAUR68	21.3667	124.833	371.467	5.73333	77.2667	353.167
AT5G10990	SAUR69	6.7	5.23333	4.6	9.16667	13.1667	4.56667
AT5G20810	SAUR70	45.4667	36.7	41	7.2	16.5333	16.4
AT1G56150	SAUR71	22.8333	19.3667	19.2333	22.5667	9.1	11.3333
AT3G12830	SAUR72	296.3	180.9	156.2	154.133	100.667	82.9333
AT3G03847	SAUR73	0	1	2.63333	0	0.333333	2.53333
AT3G12955	SAUR74	9.66667	5.93333	7.7	22.9	15.8	20.7667
AT5G27780	SAUR75	0.333333	0	0	0	0	0.633333
AT5G20820	SAUR76	124.7	157.767	198.367	51.7667	156.5	267.967
AT1G17345	SAUR77	622.867	647.067	774.067	317.567	288.467	219.9
AT1G72430	SAUR78	1176.23	1548.5	1649.63	1091.53	1116.5	644.7
AT2G35290	SAUR79	234.2	215.4	245.233	714.933	714.167	676.2
AT3G51200	SAUR18
AT3G43120	SAUR39
AT5G53590	SAUR30
AT4G38825	SAUR13
AT3G20220	SAUR47

## Sheet: PP2C-D family
gene	annotation	Mock-D	5uM-Pic-D	50uM-Pic-D	Mock-L	5uM-Pic-L	50uM-Pic-L
AT5G02760	PP2C-D1	436.267	1561.27	3176.07	57.6667	195.267	844.4
AT3G17090	PP2C-D2	1347.6	1773.1	2144.9	1360.2	1966.97	2885.3
AT3G12620	PP2C-D3	919.167	996.733	1003	974.767	933.567	960.667
AT3G55050	PP2C-D4	971.167	939.4	1039.33	845.733	906.967	833.1
AT4G38520	PP2C-D5	2318.87	1853.27	1698.6	1589.83	1348.27	1220.4
AT3G51370	PP2C-D6	2230.97	2131.77	2098.73	1730.93	1845.9	1712.33
AT5G66080	PP2C-D7	555.8	811.733	917.067	82.6333	96.7667	124.4
AT4G33920	PP2C-D8	2913.67	2745.17	2949.47	2984.37	3069.53	3168.23
AT5G06750	PP2C-D9	467.067	535.3	534.733	459.867	441.7	445.6

## Sheet:  ACS family
gene	annotation	Mock-D	5uM-Pic-D	50uM-Pic-D	Mock-L	5uM-Pic-L	50uM-Pic-L
AT3G61510	ACS1
AT1G01480	ACS2	80.1	120.9	93.3667	51.8333	82.5667	77.4
AT5G28360	ACS3	1.3	1.33333	0.633333	1.73333	0	0
AT2G22810	ACS4	5.06667	86.7333	278	7.26667	74.7	412.833
AT5G65800	ACS5	327.533	447.733	545.367	4.13333	5.33333	13.8333
AT4G11280	ACS6	4900.07	5474.63	6838.7	4479.6	4984.17	6114.4
AT4G26200	ACS7	204	138	136.567	120	63.9	58.7667
AT4G37770	ACS8	53	717.633	1970.83	40.3667	151.4	2048.53
AT3G49700	ACS9	7.03333	14.0667	33.3667	0	2.33333	15.2333
AT1G62960	ACS10	266.767	269.3	239.867	432.2	424.767	430.833
AT4G08040	ACS11	619.867	1069.3	1434.03	408	621.267	827.267
