# Supplementary material for: Apoplastic pH determines the hypocotyl response to auxin dosage and light
Source: Research Square preprint supplement (doi:10.21203/rs.3.rs-3625192/v1), 2023-12-19
Supplement: Supplementary file 4 [file b3c542519ad253f8e9b591ca.xlsx]

## Sheet: counts
gene	50uM-Pic-D-H1_htseqreport-gene_id_no.txt	50uM-Pic-D-H2_htseqreport-gene_id_no.txt	50uM-Pic-D-H3_htseqreport-gene_id_no.txt	50uM-Pic-L-H1_htseqreport-gene_id_no.txt	50uM-Pic-L-H2_htseqreport-gene_id_no.txt	50uM-Pic-L-H3_htseqreport-gene_id_no.txt	5uM-Pic-D-H1_htseqreport-gene_id_no.txt	5uM-Pic-D-H2_htseqreport-gene_id_no.txt	5uM-Pic-D-H3_htseqreport-gene_id_no.txt	5uM-Pic-L-H1_htseqreport-gene_id_no.txt	5uM-Pic-L-H2_htseqreport-gene_id_no.txt	5uM-Pic-L-H3_htseqreport-gene_id_no.txt	Mock-D-H1_htseqreport-gene_id_no.txt	Mock-D-H2_htseqreport-gene_id_no.txt	Mock-D-H3_htseqreport-gene_id_no.txt	Mock-L-H1_htseqreport-gene_id_no.txt	Mock-L-H2_htseqreport-gene_id_no.txt	Mock-L-H3_htseqreport-gene_id_no.txt
AT1G01010	551.1	585.9	708.4	168.9	191.4	164.1	619.4	558.5	562.7	263	221.3	215.6	675.5	647.5	674.4	181	219.9	237
AT1G01020	159.9	164.8	236.1	200.4	178.5	202.6	179.3	151.7	203.3	202.8	249.1	197	189.7	183.8	189.4	176	179.3	220.6
AT1G01030	26.1	7.7	7	14.7	14.9	8.4	16.5	16.7	6	14.1	24.8	6.2	16.2	13.2	14.9	11	10.9	8.8
AT1G01040	1153.6	1279.7	1546.5	777.4	849	774.7	1136.1	1245.1	1397.8	748.9	838.6	745.8	1202.9	1279.1	1353.5	755.8	751.8	690.3
AT1G01046	0	0	0	0	5	0.9	1	3	3	0	0	0	0	0	0	0	0	1.1
AT1G01050	1052	1075.4	951.6	1054.3	1077.1	1219.2	950.9	1046.1	967.2	1129.3	1114.5	1274.9	1097.4	1075.5	976.6	1152.7	1129.1	1226.9
AT1G01060	696	367.1	598.9	764.8	910.5	1659.1	709.6	371.4	502.6	1214.7	514.1	830.3	599.4	468.5	580.2	1135.7	646.8	1105.1
AT1G01070	313.8	333.4	232.1	313.7	292.6	275.7	317	276.8	223.3	327.3	269.9	323.9	205.9	202.7	180	393.9	279.3	262.3
AT1G01080	201.1	202.4	172.8	600.1	581.2	653.7	184.2	172.4	212.3	614.4	565.7	582.8	191.7	196.1	210.8	658.8	548.7	627.7
AT1G01090	2035.6	1987	1866	2951.1	3019	2973.9	2030.8	1979	1989.6	2880	2561.4	3087.2	1932.1	1902.1	1876.8	2750.4	2756.5	3062.9
AT1G01100	1683.6	1796.2	1452	2667.8	2971.4	2871.7	1806.9	1621.4	1743.2	2446.4	2698.4	2781.9	1584.2	1616.5	1607.2	2625.4	2497	3004.7
AT1G01110	107.6	83.8	88.4	150	119	128.5	118.3	84.7	86.1	124.5	116.1	159.9	98.4	88.6	76.5	109	121.8	115.2
AT1G01120	13730.2	17559.9	18357.8	3900.5	4200.3	4096.6	14453.2	17709.5	15896.5	3396	4059.9	3417.3	13558	14238.4	13772.9	2571.4	3468.6	3893.6
AT1G01130	125.7	138.8	118.6	109.1	89.3	97.5	94	145.8	162.2	71.3	77.4	99	123.7	148.9	116.6	74	77.3	93.3
AT1G01140	1241.1	1402.1	1761.5	1087.9	1391.5	1531.5	1790.4	2004.6	1957.5	1911.3	2225	1368.8	2678.5	2300.8	2363.7	1580.6	2128.5	2208
AT1G01150	0	1.9	3	1	3	2.8	0	3	0	2	0	0	2	0.9	1.9	4	1	1.1
AT1G01160	499.8	490.5	485.3	456.3	426.5	439.9	404.2	527	483.6	430.7	435.7	399.2	537.5	479.8	508.4	433.9	425.9	487.3
AT1G01170	240.4	186.9	157.8	384	397.7	348.9	246.2	201	146.2	420.6	402.9	342.5	238.3	189.5	198.7	500.9	412	469.7
AT1G01180	425.4	429.8	378.8	172	136.9	151.9	380	385.2	361.5	256	200.5	222.8	566.9	554.2	499.1	244.9	231.8	256.8
AT1G01183	0	0	0	0	2	2.8	2.9	3.9	0	0	0	0	1	0	0	1	0	1.1
AT1G01190	15.1	10.6	19.1	213	271.8	327.3	6.8	6.9	18	184.7	247.1	352.8	19.3	30.2	16.8	259.9	314	310.6
AT1G01200	180	169.6	155.8	37.8	54.5	31.9	146.4	205.9	146.2	36.1	19.8	47.4	96.4	138.6	101.7	43	27.7	45
AT1G01210	219.2	248.6	239.2	159.5	152.7	151	159	214.7	187.2	120.5	145.9	150.6	121.7	161.2	188.4	123	112.9	156.9
AT1G01220	417.4	385.4	394.9	428	398.7	362	464.3	416.7	452.6	434.7	308.6	425	371.2	391.2	418.8	412.9	421.9	328.1
AT1G01225	56.3	68.4	68.3	81.8	62.5	92.8	71.7	44.3	59.1	63.2	57.6	49.5	64.9	50	44.8	39	38.6	59.3
AT1G01230	604.4	606.1	687.3	433.3	413.6	365.8	697	683.6	586.8	458.8	396	425	714	682.4	607.3	380.9	389.3	425.8
AT1G01240	272.6	287.2	249.2	194.1	154.7	149.1	318.9	310.3	308.4	236.9	143.9	178.4	333.7	354.4	316.2	186	221.9	200.8
AT1G01250	10.1	1.9	8	5.2	5	3.8	3.9	6.9	6	5	4	4.1	6.1	5.7	0.9	6	5	2.2
AT1G01260	416.4	437.5	503.4	606.4	675.4	632.1	536.1	407.8	443.6	716.7	668.9	601.4	401.6	439.2	436.6	600.9	661.6	605.8
AT1G01290	222.3	235.1	260.3	167.9	168.6	166.9	275.3	232.5	233.3	165.6	180.6	171.2	258.6	223.4	258.4	190	152.5	184.4
AT1G01300	2821.1	3172.2	3088.9	3693.8	4228	3848	3099.1	3262.5	3960.1	3354.9	3521.1	4254.9	3455.4	3553.5	3506.4	3542.2	4465	4620.1
AT1G01310	6	1.9	3	0	1	0	3.9	3.9	4	1	0	0	7.1	2.8	4.7	0	5	0
AT1G01320	2553.5	1571.7	1182.7	3137.8	3598.3	3364.1	2413.7	2142.5	1978.5	3503.4	3140	2775.7	2237.4	2246.1	1806.8	4220	3398.3	2777.6
AT1G01340	179	111.8	130.6	232.9	267.8	258.8	156.1	107.4	117.2	267	345.4	269.2	213	159.3	180	250.9	255.5	334.7
AT1G01350	427.4	437.5	433.1	509.9	474.1	483.9	392.6	451.2	404.5	531	655	498.2	428	413.8	444.9	473.9	536.8	496
AT1G01355	9.1	8.7	13.1	1	0	0	2.9	13.8	6	1	2	0	14.2	7.5	17.7	0	2	2.2
AT1G01360	356	383.5	474.3	167.9	186.5	180.1	362.5	391.1	514.7	206.8	188.6	186.7	478.7	529.7	444.9	221.9	224.8	237
AT1G01370	47.3	66.5	49.2	59.8	54.5	66.6	35.9	71.9	73.1	33.1	39.7	60.9	61.9	55.6	55	48	65.4	60.4
AT1G01380	40.2	44.3	47.2	8.4	6	7.5	41.7	38.4	36	4	6.9	11.3	36.5	36.8	39.2	12	1	7.7
AT1G01390	193.1	70.3	77.4	0	5	4.7	152.2	147.8	155.2	3	0	0	138.9	160.2	120.3	2	3	0
AT1G01420	46.3	61.7	49.2	174.1	146.8	171.6	47.5	72.9	98.1	235.9	206.4	275.4	123.7	98	98.9	322.9	250.6	253.5
AT1G01430	1197.8	1341.4	1219.9	1111	1124.7	1208	1224.3	1401.8	1477.9	1645.3	1498.5	1674.1	1540.6	1672.1	1412.3	1976.5	1771	1905.1
AT1G01440	553.1	505.9	561.7	552.9	440.4	471.7	547.7	557.5	500.6	581.2	477.3	460	529.4	558	592.3	596.9	568.5	435.7
AT1G01448	74.4	87.7	68.3	65	71.4	85.3	91.1	87.7	84.1	84.3	100.2	84.6	80.1	102.7	84.9	101	92.1	109.7
AT1G01453	3	3.9	4	9.4	9.9	8.4	0	2	2	6	5	10.3	1	1.9	3.7	8	5	4.4
AT1G01460	0	0	2	0	0	0.9	2.9	0	2	3	0	0	1	2.8	0.9	0	0	0
AT1G01470	9785.7	10476.4	13234	7804.1	8466	7942.7	8046.7	11366.7	12438	9069.8	11089.1	7866.1	12848.1	10920.6	11491.3	9132.9	9988.8	9878.9
AT1G01471	0	0	0	0	0	0	0	0	0	1	0	1	0	0	0	0	0	0
AT1G01480	99.6	103.1	77.4	82.9	56.5	92.8	144.4	116.2	102.1	93.4	89.3	65	89.3	74.5	76.5	63	57.4	35.1
AT1G01490	939.3	983.9	1048.1	1360.7	1440.1	1517.5	1015.9	973.2	1054.4	1626.2	1650.4	1578.2	1331.7	1382.7	1341.4	1610.6	1719.4	1909.5
AT1G01500	279.6	242.8	211	189.9	152.7	102.2	275.3	235.4	211.3	208.8	195.5	178.4	333.7	269.6	226.7	243.9	150.6	194.2
AT1G01510	712.1	700.5	687.3	892.8	938.2	939.7	676.6	649.2	722.9	831.2	820.7	950	694.7	738	699.6	894.8	881.5	899.9
AT1G01520	31.2	40.5	37.2	4.2	6	14.1	30.1	34.5	25	4	3	6.2	41.6	39.6	36.4	7	3	2.2
AT1G01530	1	0	0	1	0	0	0	0	0	0	0	3.1	1	0	0	0	0	0
AT1G01540	1809.3	1956.1	2007.7	1918.8	1913.2	1851.3	1503.5	1763.3	1849.4	1734.7	2255.7	1863.9	1440.2	1461.9	1428.1	1525.6	1637.2	1577
AT1G01550	5726.6	5890.6	6480.4	6102.5	5812.9	5448.9	5929.6	5625.7	5671.3	6059.2	6199.6	5702.1	5979.8	5516.8	5389.8	5292.8	5397	5424.5
AT1G01560	18.1	32.8	24.1	70.3	62.5	49.7	36.8	22.7	35	80.3	40.7	50.5	18.3	6.6	15.9	32	54.5	73.5
AT1G01570	27.2	17.3	18.1	23.1	25.8	33.8	26.2	19.7	16	30.1	37.7	30.9	23.3	17	23.3	25	30.7	16.5
AT1G01580	73.4	44.3	37.2	43	5	29.1	32	27.6	27	26.1	12.9	22.7	12.2	33.9	83	40	20.8	18.7
AT1G01590	1	0	1	12.6	11.9	15.9	0	2	0	14.1	13.9	14.4	0	0	0	17	15.8	17.6
AT1G01600	749.3	746.8	512.5	108.1	50.6	71.3	740.6	824.5	604.8	48.2	46.6	58.8	603.5	655.1	499.1	91	93.1	64.7
AT1G01610	1498.5	2147.9	1817.8	956.8	1049.3	950	1375.5	2192.8	2059.7	880.4	829.7	1119.2	1833.7	2046.3	1965.4	915.8	1046.9	1345.4
AT1G01620	34173.6	32074.9	33601.6	5089.1	4910.4	5177	40115.1	30711.5	30431.2	7782.8	5898.9	6428.2	39738.9	34037	31531.7	7093.4	7006.6	8196.6
AT1G01630	989.6	1067.7	1046.1	737.5	717.1	767.2	1108	1213.6	1042.3	638.4	610.3	768.5	1102.4	1068.9	914.2	657.8	688.4	764.9
AT1G01640	443.5	428.8	383.9	157.4	171.6	159.4	453.7	360.5	458.6	200.8	160.8	210.4	469.6	470.3	472.9	172	192.2	221.7
AT1G01650	1174.7	1201.6	1348.5	708.1	790.5	804.7	1124.5	1117.1	1336.7	866.3	1102.6	741.6	1291.1	1273.4	1210.8	870.8	920.1	780.3
AT1G01660	14.1	7.7	6	21	7.9	15.9	9.7	3.9	10	14.1	16.9	21.7	7.1	11.3	8.4	17	19.8	17.6
AT1G01670	13.1	7.7	8	19.9	9.9	18.8	3.9	4.9	5	11	13.9	7.2	9.1	11.3	5.6	14	12.9	23
AT1G01680	1	1	2	2.1	4	4.7	1.9	1	2	2	2	4.1	1	0.9	3.7	5	4	1.1
AT1G01690	64.4	61.7	42.2	62.9	76.4	99.4	61.1	51.2	59.1	66.3	68.5	109.3	52.7	55.6	68.1	84	74.3	66.9
AT1G01695	5	9.6	5	4.2	6	3.8	2.9	2	3	3	4	4.1	1	6.6	4.7	7	4	1.1
AT1G01700	69.4	75.2	109.5	23.1	31.7	26.3	62	90.6	58.1	42.2	28.8	30.9	71	63.2	78.4	34	27.7	28.5
AT1G01710	637.6	649.5	640.1	498.3	466.1	475.5	592.3	621.6	547.7	531	534.9	480.7	652.1	589.1	637.1	495.9	570.5	497.1
AT1G01720	1862.6	2119	1970.5	1753	1722.8	1940.4	1615.9	1549.5	1473.9	1915.3	1692.1	1580.2	1441.2	1566.5	1643.6	1795.6	1940.3	1964.4
AT1G01725	57.3	70.3	85.4	38.8	39.7	56.3	85.3	86.7	56.1	51.2	45.7	47.4	69	74.5	56	53	44.6	60.4
AT1G01730	489.8	472.2	532.6	357.7	352.1	364.8	498.3	479.7	533.7	404.6	369.2	403.3	512.2	496.7	450.5	373.9	360.5	392.9
AT1G01740	63.4	63.6	68.3	112.3	121	110.7	55.3	62.1	65.1	109.4	107.2	112.4	61.9	67.9	72.8	118	73.3	104.3
AT1G01750	48.3	47.2	43.2	101.8	66.5	108.8	62	30.5	49.1	92.4	129	156.8	41.6	27.3	42	102	69.3	83.4
AT1G01760	36.2	39.5	31.2	54.6	47.6	57.2	41.7	39.4	31	56.2	58.6	65	33.5	43.4	34.5	69	50.5	59.3
AT1G01770	381.2	325.7	319.5	355.6	341.2	339.5	384.8	355.6	361.5	466.8	441.6	362.1	395.5	401.5	412.3	435.9	381.3	342.4
AT1G01780	263.5	261.1	207	166.8	150.8	138.8	226.8	229.5	197.3	149.6	183.6	158.8	259.6	259.2	239.7	164	141.6	148.2
AT1G01790	447.5	357.5	423	1867.4	1917.2	2121.4	402.3	408.8	423.5	1803.9	1828	1759.7	367.1	412.8	397.4	1685.6	1954.2	1862.3
AT1G01800	969.5	897.1	875.2	849.8	868.8	921	990.7	842.2	990.3	917.5	799.9	873.7	1004.1	903	930.9	888.8	913.2	890
AT1G01810	19.1	12.5	14.1	16.8	12.9	16.9	7.8	14.8	15	10	12.9	11.3	17.2	12.3	17.7	13	13.9	11
AT1G01820	943.4	806.5	818	796.3	804.4	701.5	856.9	822.5	850.1	906.5	1000.3	858.2	901.6	853	848.9	864.8	839.9	802.2
AT1G01830	454.6	460.6	478.3	189.9	210.3	221.3	584.5	513.2	514.7	257	175.7	257.9	628.8	641.9	542	256.9	241.7	212.9
AT1G01840	6	9.6	5	8.4	20.8	10.3	11.6	6.9	10	16.1	6.9	10.3	10.1	17.9	14.9	11	3	5.5
AT1G01860	93.5	80.9	65.3	98.6	102.2	73.2	86.3	80.8	86.1	105.4	72.4	68.1	83.2	87.7	79.3	116	87.2	72.4
AT1G01880	47.3	35.7	28.1	30.4	37.7	38.5	27.1	34.5	35	46.2	24.8	34	47.7	38.6	29.8	39	34.7	38.4
AT1G01900	608.5	689	673.3	166.8	167.6	181.9	671.8	784.1	774	191.7	92.3	136.2	715	728.6	611	167	155.5	106.4
AT1G01910	709	727.5	618	840.3	892.6	752.2	690.2	708.3	647.8	857.3	838.6	789.1	659.2	715.4	622.2	813.8	792.4	843.9
AT1G01920	238.4	251.5	237.1	302.1	391.8	338.6	236.5	189.1	225.3	227.9	320.5	284.7	213	204.5	194	264.9	272.4	283.1
AT1G01930	226.3	202.4	239.2	322.1	293.6	264.5	207.4	241.3	208.3	295.1	329.5	297.1	270.8	274.3	262.1	303.9	270.4	293
AT1G01940	210.2	219.7	239.2	310.5	243	277.6	206.5	222.6	190.2	219.8	267	254.8	226.2	189.5	194	242.9	237.7	300.7
AT1G01950	865.9	786.3	908.4	836.1	928.3	966.9	837.5	794	841.1	729.8	914	824.2	741.4	699.4	698.7	729.8	910.2	786.8
AT1G01960	2216.6	2274.1	2258.9	2826.2	2893.1	2696.3	2516.5	2216.4	2419.1	2877	2586.2	2854.1	2257.6	2298.9	2274.2	2856.3	2746.6	2628.3
AT1G01970	131.8	106	106.5	205.6	220.2	164.1	112.4	108.4	125.2	216.8	204.4	160.9	160.2	131	130.6	213	206	167.9
AT1G01980	0	0	0	0	1	0	0	1	0	0	0	0	0	0	0.9	1	2	0
AT1G01990	313.8	292.9	267.3	342	383.8	333.9	275.3	272.9	278.4	424.6	470.4	369.3	337.7	347.8	325.5	362.9	349.6	406
AT1G02000	876	873	1028	461.6	451.3	423.9	805.5	704.3	841.1	433.7	474.4	459	703.9	686.2	642.7	396.9	450.7	408.2
AT1G02010	188.1	177.3	204	142.7	151.7	133.2	212.3	210.8	212.3	123.5	162.8	127.9	200.8	196.1	188.4	143	141.6	140.5
AT1G02020	221.3	201.4	192.9	186.7	195.4	192.3	213.3	240.4	235.3	216.8	217.3	225.9	238.3	242.2	215.5	250.9	214.9	218.4
AT1G02030	27.2	12.5	21.1	5.2	3	4.7	23.3	23.6	29	6	7.9	9.3	21.3	23.6	13.1	7	5.9	4.4
AT1G02040	1	0	0	0	1	0	0	0	0	2	0	0	0	0	0.9	0	2	0
AT1G02050	66.4	65.5	52.3	99.7	111.1	111.6	55.3	60.1	47.1	77.3	137	100.1	52.7	67.9	76.5	78	97.1	119.6
AT1G02060	80.5	111.8	89.4	174.1	172.6	170.7	69.8	115.3	101.1	177.7	206.4	231.1	109.5	112.2	120.3	166	175.3	184.4
AT1G02065	1	1	0	5.2	3	2.8	0	2	4	3	7.9	1	0	2.8	3.7	3	3	1.1
AT1G02070	1	5.8	0	0	0	0.9	2.9	3.9	3	2	0	0	4.1	3.8	2.8	4	0	1.1
AT1G02074	0	1	0	0	0	0	2.9	0	7	1	0	0	1	0	4.7	1	1	0
AT1G02080	3026.2	3028.6	3204.5	2716.1	2917.9	2712.3	3206.7	3096.1	3338.3	2541.7	2708.3	2861.3	3061.9	3107.6	3115.6	2688.4	2806	2364.9
AT1G02090	655.7	701.5	709.4	622.1	708.1	688.4	619.4	688.6	655.8	592.3	661.9	672.5	555.8	690.9	665.1	540.9	656.7	670.5
AT1G02100	1021.8	1002.2	1102.3	601.1	614.9	536.5	1121.6	960.4	976.3	656.5	705.6	558	1042.6	1084.9	1095.1	573.9	618.1	589.3
AT1G02110	392.2	328.6	266.3	451.1	491.9	484.9	354.8	373.3	362.5	474.8	440.6	475.5	388.4	356.3	351.7	423.9	490.3	448.8
AT1G02120	1740.9	1871.3	1973.5	1434.1	1566.1	1455.6	1886.4	1779	1758.3	1678.4	1681.1	1602.9	1958.4	1780.5	1914.1	1611.6	1522.3	1586.9
AT1G02130	798.5	830.6	798.9	516.1	499.9	544	835.6	791	794	560.1	543.8	585.9	822.5	842.7	802.2	571.9	615.1	611.3
AT1G02136	0	0	0	0	0	0	0	0	0	0	0	0	0	0	0.9	1	0	0
AT1G02140	1928	2168.1	2044.9	1584.1	1656.3	1645.9	2120	2136.6	2085.7	1560	1700	1631.8	2025.4	2091.6	1907.6	1765.6	1563	1853.5
AT1G02145	318.8	294.9	309.5	300	315.4	293.5	358.7	334.9	318.4	274.1	312.6	258.9	359	330.8	328.3	300.9	286.2	288.6
AT1G02150	544.1	481.8	363.8	1050.1	969	980.1	504.1	530	543.7	1102.2	963.6	917	527.4	553.3	461.7	1036.8	909.2	939.4
AT1G02160	177	162.9	126.6	214	206.3	207.3	190	159.6	160.2	200.8	237.2	187.7	188.6	196.1	185.6	194	210	228.3
AT1G02170	784.5	709.2	801.9	840.3	819.2	832.8	839.5	737.8	796	928.6	1111.5	896.4	827.6	754.1	755.6	813.8	958.8	905.4
AT1G02180	124.7	104.1	84.4	67.1	51.6	51.6	99.8	95.6	78.1	58.2	60.5	61.9	96.4	97.1	102.6	69	57.4	57.1
AT1G02190	4	3.9	5	4.2	2	0.9	7.8	1	6	1	3	1	6.1	1.9	7.5	4	1	2.2
AT1G02205	5441	7040.2	5406.2	133.2	58.5	66.6	5004.8	8422.3	5762.4	101.4	71.5	52.6	6008.2	5955.1	5013.8	95	86.2	45
AT1G02220	150.9	104.1	62.3	87.1	88.3	121	120.2	105.4	105.1	132.5	84.4	121.7	127.8	103.7	120.3	114	92.1	141.6
AT1G02230	14.1	28.9	12.1	6.3	3	8.4	19.4	5.9	11	5	4	5.2	21.3	16	19.6	7	2	5.5
AT1G02250	0	1.9	4	0	1	0	1	1	1	0	1	2.1	0	0.9	4.7	0	2	0
AT1G02260	278.6	298.7	290.4	186.7	159.7	168.8	277.2	233.5	257.3	212.8	201.5	177.4	218.1	255.4	247.2	198	173.3	156.9
AT1G02270	925.3	1092.7	1321.4	549.7	508.8	569.3	1040.1	1069.8	1132.5	616.4	618.3	640.6	984.8	1067	1121.2	657.8	781.5	718.8
AT1G02280	809.6	600.3	520.5	553.9	583.2	544	689.2	640.3	678.9	601.3	537.9	501.3	740.4	739.9	639	640.9	516	576.1
AT1G02290	176	155.1	154.7	111.2	117	96.6	137.6	186.2	169.2	112.4	100.2	133.1	161.3	175.3	151.1	141	108	83.4
AT1G02300	120.7	99.3	102.5	64	55.5	49.7	135.7	123.1	116.1	105.4	100.2	74.3	174.4	160.2	126.9	132	109.9	86.7
AT1G02305	3029.2	2878.3	2936.2	1310.3	1176.3	1171.4	2994.4	2872.5	2735.5	1638.3	1422.1	1365.7	3265.8	3052	3077.3	1552.6	1544.1	1545.2
AT1G02310	84.5	92.5	135.7	32.5	26.8	21.6	68.8	106.4	115.1	29.1	35.7	33	118.7	124.4	139.9	29	35.7	25.2
AT1G02330	381.2	398.9	435.1	471	459.2	468	341.2	420.6	429.6	428.6	483.3	516.8	356	428.9	419.8	454.9	463.5	469.7
AT1G02335	1279.3	1119.7	1146.5	1136.2	1062.2	1149.8	1188.4	1084.6	1109.4	1074.1	902.1	1178	1347.9	1163.1	1079.3	1008.8	1224.2	1382.7
AT1G02340	735.2	699.6	747.6	67.1	47.6	55.3	734.8	868.8	853.1	93.4	55.6	44.4	889.5	1100	960.8	103	73.3	59.3
AT1G02350	13.1	11.6	16.1	18.9	5	7.5	21.3	11.8	10	13.1	11.9	13.4	15.2	5.7	6.5	13	4	9.9
AT1G02360	622.5	502	526.5	142.7	94.2	79.7	846.3	453.1	454.6	96.4	126	135.1	707.9	450.5	569	145	98.1	97.7
AT1G02370	53.3	70.3	54.3	136.4	144.8	130.4	73.7	76.8	82.1	95.4	107.2	157.8	50.7	73.5	59.7	120	105	118.5
AT1G02380	19.1	16.4	14.1	45.1	29.8	35.6	20.4	9.9	16	28.1	67.5	25.8	22.3	20.7	20.5	42	28.7	27.4
AT1G02390	345	319	429.1	151.1	196.4	184.8	399.4	317.2	344.4	188.7	196.5	256.8	485.8	362.9	359.1	171	229.8	271.1
AT1G02400	2984	3592.4	4957	2324.8	2395.2	2493.8	4041.3	2893.1	3562.6	2763.6	3306.7	2086.7	3205.9	2741.9	3160.4	1870.6	1975	2093.9
AT1G02405	16.1	10.6	5	10.5	8.9	4.7	13.6	7.9	18	7	15.9	2.1	3	9.4	17.7	7	11.9	8.8
AT1G02410	189.1	173.5	157.8	271.7	245	286	189	201	161.2	255	279.9	259.9	176.5	181.9	158.6	249.9	292.2	296.3
AT1G02420	61.3	68.4	55.3	68.2	81.3	75	55.3	62.1	66.1	94.4	88.3	73.2	45.6	56.6	57.8	82	64.4	59.3
AT1G02430	34.2	19.3	21.1	15.7	28.8	25.3	37.8	25.6	25	25.1	21.8	8.3	17.2	28.3	22.4	13	16.8	19.8
AT1G02440	12.1	18.3	14.1	2.1	5	1.9	9.7	3	6	1	4	0	10.1	4.7	10.3	2	2	1.1
AT1G02450	10.1	15.4	10	4.2	8.9	2.8	4.8	4.9	3	3	3	9.3	7.1	4.7	5.6	3	1	7.7
AT1G02460	47.3	32.8	20.1	29.4	39.7	42.2	30.1	25.6	31	34.1	38.7	36.1	28.4	48.1	44.8	33	51.5	31.8
AT1G02470	38.2	24.1	32.2	12.6	11.9	6.6	35.9	57.1	40.1	9	8.9	15.5	30.4	22.6	28.9	10	6.9	5.5
AT1G02475	135.8	134.9	132.6	705	664.5	661.2	108.6	135.9	118.2	761.9	615.3	619.9	124.7	125.4	131.5	747.8	700.3	669.4
AT1G02490	2	1	0	2.1	0	8.4	0	0	1	1	1	1	0	0	0.9	2	0	3.3
AT1G02500	11847.5	11618.3	10568.1	7238.7	7019	7340.6	11784.5	10233.9	10950.1	7656.4	7138.4	7312.2	12062	11351.3	10932.5	7077.4	7707.8	8360.1
AT1G02510	0	0	0	0	0	0	0	0	0	0	1	0	1	0	0	0	0	0
AT1G02520	370.1	359.4	337.6	195.1	223.2	207.3	371.3	322.1	319.4	183.7	178.6	221.8	264.7	330.8	336.7	138	196.1	155.8
AT1G02530	3	14.5	5	4.2	9.9	6.6	8.7	8.9	5	3	5	7.2	5.1	1.9	13.1	4	3	8.8
AT1G02560	992.7	982.9	818	2809.4	2739.4	2820.1	929.6	1028.4	1071.4	2978.4	2990.1	2524	913.8	1064.2	1052.2	2865.3	2866.4	2840.1
AT1G02570	5	1	8	7.3	6	9.4	7.8	1	3	8	8.9	9.3	1	4.7	5.6	8	3	4.4
AT1G02575	0	1	1	0	0	0.9	1.9	5.9	1	3	0	3.1	1	1.9	0.9	1	0	0
AT1G02580	25.1	27.9	22.1	0	0	0.9	27.1	21.7	30	3	3	2.1	27.4	31.1	25.2	1	2	3.3
AT1G02610	69.4	64.6	69.3	149	117	117.2	91.1	82.7	74.1	251	125	116.6	96.4	93.3	81.2	300.9	140.6	129.5
AT1G02620	7	2.9	1	5.2	1	0.9	3.9	4.9	5	5	8.9	4.1	1	3.8	1.9	5	5	6.6
AT1G02630	4	6.7	8	9.4	4	4.7	3.9	4.9	4	10	3	3.1	4.1	3.8	4.7	15	5	3.3
AT1G02640	1041.9	869.2	890.3	7154.7	6414	6048.2	825.9	1045.2	1173.5	8717.4	6703.7	6913	968.6	1108.5	1114.7	8361.1	7884.1	8192.2
AT1G02650	23.1	20.2	13.1	45.1	50.6	40.3	23.3	20.7	24	51.2	40.7	44.4	19.3	15.1	8.4	40	60.4	37.3
AT1G02660	2834.1	3073.9	3781.3	6851.5	6172	6472.1	2343	2529.7	3021.9	6306.2	5638.8	4982.1	2590.3	2349.8	2793.8	5161.8	4980.1	4188.8
AT1G02670	31.2	42.4	33.2	82.9	66.5	94.7	42.7	39.4	38	84.3	94.3	65	38.5	45.2	36.4	57	53.5	46.1
AT1G02680	128.7	117.6	93.5	145.8	147.8	147.2	112.4	117.2	113.1	156.6	174.7	176.4	129.8	118.8	99.8	183	142.6	124
AT1G02681	0	0	1	4.2	0	0.9	0	1	3	3	2	0	5.1	0.9	0	0	0	3.3
AT1G02690	324.8	355.6	335.6	475.2	546.5	539.3	343.2	317.2	322.4	350.3	362.2	534.3	326.6	334.6	333	370.9	472.5	502.6
AT1G02700	11.1	22.2	21.1	6.3	3	12.2	15.5	17.7	34	6	8.9	3.1	16.2	17.9	15.9	10	2	4.4
AT1G02710	21.1	20.2	22.1	30.4	12.9	13.1	18.4	28.6	23	16.1	16.9	23.7	19.3	24.5	27.1	51	28.7	12.1
AT1G02720	135.8	154.2	111.5	163.7	201.3	189.4	171.6	161.6	156.2	199.8	143.9	173.3	164.3	173.4	186.6	195	239.7	222.8
AT1G02730	775.4	903.9	896.3	943.1	1165.4	1224.8	844.3	793	901.2	852.3	644.1	1363.6	985.8	924.7	938.4	1031.8	988.5	1250
AT1G02740	197.1	225.5	219.1	216.1	207.3	220.4	252	202.9	207.3	215.8	181.6	197	189.7	193.2	195.9	202	214.9	207.4
AT1G02750	228.3	230.3	240.2	134.3	126	130.4	266.6	214.7	198.3	158.6	150.8	138.2	264.7	257.3	238.8	166	127.8	150.3
AT1G02770	19.1	18.3	23.1	13.6	10.9	8.4	15.5	29.6	20	15.1	11.9	19.6	19.3	13.2	15.9	15	13.9	19.8
AT1G02780	5970	6145	5155.9	10625.1	11240.1	11847	5770.6	5942.9	6101.9	9305.7	10282.3	11273.1	5454.4	5706.3	5711.6	10047.7	10131.5	11196.9
AT1G02800	55.3	50.1	17.1	13.6	6	1.9	47.5	58.1	67.1	0	8.9	2.1	38.5	49	38.2	10	8.9	2.2
AT1G02810	1933	1590.9	1636.9	467.9	399.7	452	2324.5	1724.9	1491.9	339.3	331.5	502.3	2549.7	1991.6	1944	460.9	513.1	364.3
AT1G02813	2	0	0	0	3	2.8	0	0	0	2	0	0	3	2.8	0	0	0	1.1
AT1G02816	572.3	582	554.7	358.8	341.2	369.5	510.9	496.5	527.7	345.3	347.3	321.8	522.3	509.9	520.5	296.9	318.9	315
AT1G02820	6	4.8	2	110.2	81.3	168.8	5.8	10.8	10	187.7	66.5	74.3	3	5.7	2.8	151	90.1	88.9
AT1G02830	0	0	0	1	0	0.9	1.9	0	0	0	0	1	0	0	0	0	0	0
AT1G02840	2186.4	2296.3	2501.1	1560	1644.4	1757.5	2234.4	2280.4	2304	1575	1754.6	1504.9	2280	2301.7	2141.7	1427.7	1602.6	1514.4
AT1G02850	987.6	1117.8	1080.2	1979.6	2521.2	2260.2	924.8	1010.7	903.2	1980.6	2213.1	1422.4	609.5	741.8	713.6	1209.7	1156.9	1265.3
AT1G02860	1061	1019.5	1208.8	4009.6	4661.5	4411.7	1009.1	1081.6	988.3	3935.1	3936.9	3785.6	966.5	969.9	1028	3099.3	3480.5	3707.1
AT1G02870	167	186.9	180.9	331.5	348.1	300.1	149.3	192.1	175.2	205.8	280.9	315.6	177.5	188.5	182.8	263.9	277.3	308.4
AT1G02880	632.6	653.3	675.3	338.9	338.2	287	807.5	684.6	562.7	323.2	276.9	348.6	714	527.8	576.5	292.9	336.8	354.5
AT1G02890	3109.7	3126.9	4046.6	8729.4	11074.4	10437.4	3319.1	3316.7	3702.8	8120.1	9670	8118.8	3337.8	3227.3	3316.1	6643.5	8784.4	9123.9
AT1G02900	1825.4	1999.5	2347.4	2646.8	2898	2851.1	1947.5	1818.4	1989.6	2674.3	2531.6	2558.1	1843.8	1653.3	1652.9	1945.6	2234.5	2700.7
AT1G02910	320.8	330.5	353.7	675.6	757.7	720.3	407.1	371.4	355.5	739.8	842.6	664.3	376.3	350.6	326.5	805.8	707.2	728.7
AT1G02920	1437.2	1161.2	1133.5	1369	1478.8	1353.3	1948.4	1281.6	1205.6	2057.9	1743.7	1685.4	1841.8	1404.4	1297.5	1474.7	1563.9	2293.6
AT1G02930	619.5	398.9	475.3	2241.9	3328.5	2949.6	950	550.7	528.7	3347.8	3418.8	3040.8	877.3	491.1	542	2672.4	2931.8	4218.5
AT1G02940	0	0	0	8.4	12.9	25.3	0	0	0	18.1	13.9	12.4	0	0	0	19	14.9	18.7
AT1G02950	35.2	38.5	43.2	12.6	11.9	11.3	32	38.4	35	18.1	17.9	17.5	41.6	41.5	33.6	24	16.8	6.6
AT1G02952	0	1	0	0	0	0	0	0	0	0	0	0	1	0	0	0	0	0
AT1G02960	254.4	266	324.6	231.8	250.9	228.8	290.8	298.5	310.4	214.8	299.7	198	299.2	269.6	286.4	258.9	259.5	216.2
AT1G02965	0	1	0	0	2	0	0	1	0	1	1	0	0	0	0	1	0	0
AT1G02970	76.4	57.8	57.3	34.6	50.6	45	57.2	73.9	67.1	35.1	28.8	54.7	60.9	54.7	57.8	50	41.6	37.3
AT1G02980	2	1	2	1	2	2.8	0	2	0	1	1	1	2	1.9	1.9	1	0	0
AT1G02990	558.2	522.3	702.4	429.1	486	438	575.8	565.4	611.8	456.8	495.2	450.8	523.3	565.5	599.8	465.9	435.8	383
AT1G03000	386.2	334.4	335.6	427	368.9	417.3	396.5	434.4	350.5	491.9	432.7	469.3	479.7	409.1	388	517.9	454.6	429.1
AT1G03010	34.2	27.9	30.1	17.8	12.9	17.8	32	21.7	26	14.1	10.9	21.7	44.6	28.3	32.6	29	23.8	16.5
AT1G03020	1	1	0	19.9	12.9	23.4	0	1	2	23.1	22.8	16.5	2	0	2.8	24	18.8	13.2
AT1G03030	235.3	212	224.1	257	166.6	212	242.3	205.9	207.3	191.7	192.5	201.1	220.1	236.6	213.6	256.9	182.2	190.9
AT1G03040	831.7	809.4	758.7	764.8	848	789.7	735.7	789	823.1	830.2	940.8	839.6	841.8	841.7	801.3	720.8	719.1	830.7
AT1G03055	2	1.9	0	28.3	41.7	50.6	0	0	5	20.1	15.9	25.8	0	0.9	0	39	16.8	15.4
AT1G03060	2043.6	1978.3	2296.1	1753	1900.3	1802.6	2119	1845	2001.6	2002.7	2030.5	1909.3	2055.8	1962.4	2055.9	1779.6	1921.5	1830.5
AT1G03070	101.6	106	84.4	51.4	34.7	43.1	88.2	120.2	83.1	54.2	38.7	38.2	95.3	113.1	86.8	37	45.6	45
AT1G03080	3213.3	2846.5	4017.4	2076.1	2401.1	2220.8	3203.7	3275.4	3320.3	2754.6	3188.6	2499.3	3331.7	3320.7	3642.6	2436.4	2666.3	2586.6
AT1G03090	1616.2	1230.5	1276.2	1065.9	911.5	891	1619.8	1169.3	1191.5	1613.2	1437	1005.7	1795.2	1562.8	1541	1354.7	923.1	941.6
AT1G03100	35.2	44.3	48.2	85	70.4	72.2	38.8	25.6	42.1	77.3	62.5	61.9	37.5	43.4	33.6	77	80.2	61.5
AT1G03103	0	0	0	0	0	0	0	0	0	1	0	0	0	0	0	0	0	1.1
AT1G03106	49.3	45.3	14.1	92.3	4	106	8.7	15.8	37	246.9	5	2.1	42.6	23.6	21.5	154	123.8	101
AT1G03110	147.8	200.4	170.8	306.3	293.6	278.5	153.2	158.6	176.2	206.8	258	265.1	162.3	161.2	169.8	199	237.7	229.4
AT1G03120	15.1	6.7	5	1	1	2.8	16.5	5.9	11	1	1	3.1	26.4	10.4	14	2	3	4.4
AT1G03130	498.8	238	176.9	2477.9	2187.9	2557.5	358.7	374.3	398.5	3087.8	2264.7	1833	401.6	398.7	295.7	3047.3	2132.5	2178.4
AT1G03140	881	792.1	766.7	815.1	826.2	844.1	890.8	776.2	787	836.2	848.5	804.6	875.3	837	792.9	800.8	783.5	939.4
AT1G03150	217.2	245.7	240.2	217.2	243	191.3	229.7	220.7	232.3	206.8	178.6	192.9	176.5	240.4	212.7	203	184.2	228.3
AT1G03160	420.4	362.3	423	611.6	494.9	448.3	366.4	434.4	446.6	535.1	614.3	497.2	454.4	433.6	436.6	703.8	515	516.9
AT1G03170	19.1	35.7	16.1	43	35.7	48.8	31	40.4	42.1	28.1	25.8	37.1	28.4	61.3	29.8	14	27.7	20.9
AT1G03180	41.2	44.3	47.2	38.8	61.5	55.3	63	48.3	54.1	49.2	32.7	39.2	48.7	41.5	38.2	64	44.6	57.1
AT1G03190	198.1	232.2	242.2	196.2	175.5	179.1	262.7	239.4	235.3	177.7	218.3	217.6	222.1	214.9	239.7	155	185.2	188.8
AT1G03200	30.2	47.2	52.3	18.9	23.8	26.3	35.9	36.4	32	20.1	18.9	20.6	42.6	43.4	42.9	28	16.8	25.2
AT1G03210	514.9	504.9	536.6	303.2	276.7	246.7	563.2	426.5	475.6	356.4	288.8	299.1	592.3	491.1	483.2	330.9	246.6	330.3
AT1G03220	8758.9	8268.8	8328.3	13059	12858.7	11742.9	9703.3	7885.5	7749	16089.7	16116.7	13263.9	10357.1	8598.1	8479.2	10822.5	14087.4	15504.2
AT1G03230	875	914.5	833	1790.8	1588.9	1494	1298.9	953.5	924.2	1971.6	1806.2	1780.3	1088.3	894.5	905.8	1644.6	1516.4	1725.1
AT1G03240	3	2.9	2	4.2	2	6.6	1	0	1	0	2	7.2	2	0	3.7	3	8.9	2.2
AT1G03250	421.4	421.1	428.1	428	429.4	408.9	394.5	399	413.5	489.9	459.5	425	430	431.7	403	438.9	422.9	452.1
AT1G03260	262.5	272.7	248.2	170	210.3	195.1	272.4	256.1	240.3	196.8	213.4	186.7	249.5	264.9	256.5	178	206	231.6
AT1G03270	17.1	18.3	13.1	43	25.8	39.4	27.1	13.8	25	25.1	31.8	53.6	28.4	14.1	16.8	40	52.5	31.8
AT1G03280	838.8	877.9	954.6	746.9	709.1	718.4	882.1	894.4	826.1	709.7	765.1	739.6	943.2	862.4	1028.9	683.8	709.2	736.4
AT1G03290	441.5	428.8	528.6	277	265.8	260.7	535.1	480.7	471.6	359.4	254.1	295	548.7	540.1	568.1	330.9	356.6	309.5
AT1G03300	40.2	44.3	45.2	54.6	96.2	74.1	35.9	61.1	38	67.3	58.6	85.6	38.5	66	52.2	70	86.2	83.4
AT1G03310	154.9	123.3	112.5	356.7	387.8	429.5	160.9	211.8	164.2	379.5	298.7	384.7	165.3	167.8	159.5	530.9	470.5	380.8
AT1G03320	1	1.9	1	0	0	0.9	3.9	3.9	4	0	0	0	1	0.9	1.9	0	0	0
AT1G03330	334.9	389.3	380.8	345.1	346.1	379.8	399.4	378.3	355.5	339.3	368.2	368.2	384.4	369.5	371.3	329.9	320.9	366.5
AT1G03340	70.4	56.9	56.3	19.9	21.8	23.4	81.4	64	61.1	21.1	29.8	11.3	76.1	61.3	68.1	24	22.8	24.1
AT1G03350	1532.7	1523.5	1737.4	1062.7	1088	963.2	1707	1701.2	1651.1	1066.1	1002.3	1000.5	1601.4	1595.8	1442.1	947.8	1127.1	1133.6
AT1G03360	103.6	103.1	109.5	220.3	241	235.4	92.1	117.2	77.1	170.7	196.5	248.6	66.9	84.8	96.1	166	153.5	183.3
AT1G03365	308.8	227.4	258.2	283.3	322.3	313.2	264.6	289.6	280.4	324.2	337.4	261	278.9	293.1	298.5	289.9	284.3	274.4
AT1G03370	1389.9	1381.8	1582.7	1422.6	1560.1	1374	1699.3	1362.3	1354.7	1672.4	1737.7	1537.9	1590.3	1362.9	1440.3	1337.7	1649.1	1526.5
AT1G03380	1285.3	1254.6	1339.5	705	660.5	680.9	1403.6	1321	1295.7	931.6	721.5	764.3	1618.7	1470.4	1564.3	836.8	854.8	834
AT1G03390	7	1	3	0	0	0	2.9	3	5	1	0	0	0	1.9	0.9	0	4	1.1
AT1G03400	63.4	56.9	68.3	96.5	81.3	109.7	65.9	59.1	47.1	148.6	79.4	99	65.9	57.5	59.7	100	100	93.3
AT1G03410	58.3	54	47.2	85	83.3	78.8	52.3	38.4	53.1	74.3	80.4	64	34.5	44.3	45.7	79	88.2	50.5
AT1G03430	317.8	346.9	388.9	181.5	159.7	201.6	415.9	345.8	378.5	240.9	217.3	173.3	413.8	371.4	335.8	223.9	187.2	222.8
AT1G03440	175	154.2	168.8	115.4	115	121.9	160.9	184.2	184.2	145.6	141.9	127.9	187.6	234.7	201.5	157	149.6	125.1
AT1G03445	51.3	40.5	58.3	11.5	9.9	16.9	42.7	44.3	49.1	15.1	14.9	12.4	62.9	48.1	52.2	19	18.8	17.6
AT1G03457	414.4	432.7	417	305.3	313.4	330.1	376.1	412.7	393.5	312.2	362.2	308.4	378.3	399.6	440.3	287.9	374.4	297.4
AT1G03470	210.2	223.6	217.1	90.2	125	117.2	242.3	196	217.3	71.3	101.2	101.1	242.4	220.6	229.5	96	98.1	93.3
AT1G03475	841.8	807.5	702.4	1881	1917.2	1712.5	838.5	832.4	884.1	1939.4	1825	1632.8	833.7	880.4	801.3	1974.5	1811.6	1931.4
AT1G03490	1	0	1	0	0	0	1.9	1	1	0	0	0	0	2.8	1.9	0	0	0
AT1G03495	151.9	190.8	227.1	317.9	439.4	455.8	158	143.8	169.2	340.3	371.2	411.6	124.7	134.8	166	231.9	375.4	400.6
AT1G03502	5	4.8	3	1	2	0	5.8	2	5	3	3	0	2	1.9	1.9	1	0	0
AT1G03506	17.1	17.3	17.1	11.5	8.9	9.4	10.7	18.7	13	11	5	7.2	10.1	9.4	13.1	3	5	7.7
AT1G03510	22.1	27	27.1	50.4	39.7	40.3	26.2	20.7	33	37.1	37.7	39.2	22.3	21.7	21.5	30	40.6	40.6
AT1G03520	536.1	554.1	615	155.3	182.5	169.8	469.2	537.8	514.7	185.7	143.9	147.5	473.6	483.5	514.9	160	150.6	141.6
AT1G03530	231.3	279.4	278.3	454.3	405.6	374.2	249.1	243.3	239.3	306.2	355.3	416.7	180.5	223.4	243.5	278.9	274.4	276.5
AT1G03540	26.1	24.1	40.2	44.1	48.6	30	36.8	15.8	37	41.2	47.6	50.5	31.4	19.8	30.8	51	48.5	40.6
AT1G03550	44.3	43.4	69.3	36.7	30.7	30.9	38.8	43.3	57.1	21.1	32.7	29.9	48.7	47.1	30.8	29	30.7	31.8
AT1G03560	187.1	148.4	145.7	305.3	300.5	294.5	154.1	169.4	154.2	342.3	341.4	311.5	178.5	167.8	169.8	299.9	302.1	309.5
AT1G03580	22.1	36.6	26.1	45.1	40.7	26.3	29.1	16.7	17	77.3	77.4	39.2	28.4	35.8	26.1	67	39.6	47.2
AT1G03590	1146.5	1057.1	1310.3	440.6	453.3	495.2	1564.6	1363.3	1037.3	466.8	488.3	435.3	1236.3	1056.6	1035.4	480.9	440.8	411.5
AT1G03600	568.2	293.9	168.8	1750.9	1643.4	1800.7	434.3	480.7	424.5	2282.8	1655.3	1388.4	469.6	492	319	2388.5	1740.2	1696.6
AT1G03610	691.9	611.9	646.1	914.8	698.2	722.1	853	625.5	548.7	905.5	1026.1	738.5	594.3	471.3	547.6	888.8	678.5	671.6
AT1G03620	91.5	77.1	95.5	118.5	167.6	172.6	61.1	67	63.1	128.5	153.8	200.1	73	66	73.7	163	243.7	207.4
AT1G03630	171	132	86.4	950.5	1027.5	989.4	135.7	176.3	150.2	846.2	790	803.5	143	137.6	168.8	859.8	989.5	911.9
AT1G03650	36.2	51.1	40.2	60.8	57.5	69.4	30.1	23.6	32	65.3	59.5	91.8	33.5	39.6	19.6	57	68.3	70.2
AT1G03660	8	7.7	7	8.4	8.9	1.9	10.7	3	9	3	1	8.3	14.2	17.9	8.4	0	1	9.9
AT1G03670	1	0	0	0	1	0.9	0	0	0	1	0	0	0	0	0.9	1	0	0
AT1G03680	316.8	241.9	130.6	2019.5	1952.9	1891.7	250.1	315.2	312.4	2176.3	1888.5	1733.9	283	316.7	264.9	2244.5	2169.1	1971
AT1G03687	116.7	83.8	71.3	146.9	167.6	180.1	96.9	94.6	100.1	153.6	156.8	140.3	85.2	96.1	100.7	169	133.7	127.3
AT1G03700	18.1	35.7	26.1	19.9	17.9	7.5	20.4	19.7	28	21.1	16.9	21.7	30.4	33.9	17.7	12	14.9	24.1
AT1G03710	2	0	2	0	2	0	1.9	1	2	0	1	0	1	1.9	1.9	1	0	2.2
AT1G03730	909.2	1015.6	993.8	560.2	489	525.2	965.5	839.3	920.2	569.2	545.8	550.8	1070	915.2	931.9	535.9	524	568.5
AT1G03740	1848.5	1715.2	2219.7	2701.4	2557.9	2309	2154.9	1742.6	1756.3	3429.1	3294.8	2910.9	2654.2	2006.7	2205.2	2610.4	2514.8	2570.1
AT1G03746	1	0	0	0	1	0	0	0	0	0	0	0	0	0	0	1	0	0
AT1G03750	126.7	141.7	132.6	104.9	112.1	109.7	151.2	157.6	130.2	136.5	130	116.6	177.5	143.3	174.4	124	107	97.7
AT1G03760	114.7	88.7	101.5	128	172.6	182.9	84.3	118.2	100.1	136.5	188.6	170.2	86.2	84.8	102.6	144	162.4	181.1
AT1G03770	165.9	180.2	198	210.9	252.9	219.5	176.4	168.4	177.2	275.1	276.9	241.4	187.6	167.8	178.2	210	216.9	268.9
AT1G03780	262.5	237	243.2	277	277.7	295.4	273.4	227.6	256.3	145.6	164.7	258.9	334.7	281.8	274.2	228.9	247.6	246.9
AT1G03790	1010.8	781.5	933.5	39.9	32.7	49.7	756.1	630.4	608.8	61.2	28.8	34	1022.3	774.8	680.9	26	27.7	45
AT1G03800	47.3	36.6	13.1	12.6	18.8	21.6	28.1	25.6	16	12	10.9	10.3	17.2	26.4	17.7	7	11.9	6.6
AT1G03820	174	200.4	240.2	1390	1384.6	1256.7	186.1	129	159.2	566.2	584.5	1122.3	118.7	120.6	99.8	560.9	619	683.7
AT1G03830	109.6	93.5	87.4	225.6	246	216.6	104.7	122.1	106.1	210.8	222.3	253.7	104.5	110.3	101.7	255.9	243.7	212.9
AT1G03840	40.2	30.8	28.1	136.4	84.3	75	42.7	33.5	28	129.5	77.4	171.2	51.7	50.9	52.2	191	218.9	211.8
AT1G03850	664.8	581.1	529.6	329.4	260.8	287.9	770.6	523.1	567.7	477.8	495.2	471.4	773.8	868.1	847	548.9	516	546.5
AT1G03860	723.1	722.7	555.7	1161.3	1315.1	1229.5	608.8	711.2	660.9	1144.4	1332.8	1290.4	557.8	655.1	666	1170.7	1291.6	1325.7
AT1G03870	9728.4	9136	8188.6	4246.7	4083.2	4422	11269.8	8267.7	8255.6	3337.8	3296.8	3389.5	8015.3	6667.7	6665.8	3525.2	4020.3	4038.5
AT1G03880	1	251.5	1	0	1	0	35.9	0	11	0	0	2.1	14.2	47.1	4.7	0	0	0
AT1G03890	1	24.1	0	1	3	1.9	0	3	0	1	3	1	0	0	0.9	6	4	1.1
AT1G03900	2755.7	2682.7	2642.8	1649.2	1670.2	1595.3	2808.2	2574	2735.5	1855.1	1983.8	1739.1	2924	2662.7	2608.1	1694.6	1743.2	1972.1
AT1G03905	148.8	161.9	182.9	102.8	117	142.6	136.7	177.3	154.2	154.6	161.8	100.1	174.4	161.2	147.4	120	142.6	126.2
AT1G03910	961.5	900	963.7	1103.6	1211	1145.1	969.4	993.9	890.1	1070.1	1227.6	1132.6	997	1000.1	921.6	1119.7	1118.2	1044.7
AT1G03920	200.1	227.4	231.1	99.7	117	106.9	191.9	186.2	197.3	81.3	97.3	91.8	252.5	214.9	168.8	84	90.1	80.1
AT1G03930	701	678.4	665.2	527.7	576.2	489.6	617.5	796.9	690.9	569.2	581.5	539.5	602.4	667.3	660.4	579.9	572.5	525.7
AT1G03935	92.5	103.1	74.4	27.3	20.8	28.1	97.9	79.8	75.1	30.1	37.7	24.8	76.1	79.2	80.2	15	19.8	15.4
AT1G03940	145.8	184.1	197	213	308.5	297.3	143.5	142.8	186.2	194.7	221.3	229	122.7	175.3	172.6	148	230.8	203
AT1G03950	260.5	304.5	307.5	203.5	177.5	133.2	262.7	289.6	273.4	220.8	231.2	206.3	292.1	301.6	328.3	223.9	218.9	205.2
AT1G03960	210.2	212	187.9	170	191.4	169.8	182.2	195	208.3	186.7	158.8	191.9	195.7	234.7	169.8	171	192.2	169
AT1G03970	133.8	136.8	169.8	211.9	209.3	225.1	155.1	160.6	150.2	256	236.2	218.7	163.3	149.9	169.8	205	248.6	276.5
AT1G03980	6	3.9	2	27.3	10.9	16.9	6.8	4.9	7	8	4	12.4	7.1	6.6	13.1	12	16.8	8.8
AT1G03982	0	1	0	0	0	0.9	0	0	0	0	0	0	0	0.9	0	0	0	1.1
AT1G03990	141.8	125.3	104.5	58.7	58.5	47.8	96.9	98.5	107.1	66.3	42.7	51.6	98.4	106.5	83	42	38.6	53.8
AT1G04000	215.2	223.6	244.2	124.8	124	135.1	259.8	228.5	217.3	143.6	86.3	97	225.2	230	210.8	125	106	103.2
AT1G04010	252.4	248.6	248.2	179.4	188.4	141.6	218.1	257.1	230.3	125.5	152.8	187.7	228.2	242.2	218.3	158	221.9	127.3
AT1G04020	146.8	131.1	116.6	153.2	132.9	136.9	109.5	141.8	136.2	118.5	84.4	125.8	143	146.1	102.6	121	144.6	95.5
AT1G04030	261.5	309.3	298.4	102.8	102.2	107.9	276.3	249.2	248.3	105.4	78.4	117.6	300.2	283.7	283.6	76	98.1	119.6
AT1G04040	2176.4	2165.2	2253.9	1334.4	1455	1348.6	2301.3	2518.8	2304	1331.1	1556.1	1655.5	2283	2218.8	2284.4	1411.7	1465.9	1648.3
AT1G04050	88.5	91.5	108.5	103.9	109.1	116.3	92.1	95.6	96.1	86.3	93.3	107.3	107.5	114.1	85.8	90	92.1	107.5
AT1G04070	167	186	177.9	135.3	157.7	161.3	161.9	175.3	168.2	185.7	202.5	184.6	169.4	161.2	143.7	142	149.6	196.4
AT1G04080	1888.8	1904.1	2039.9	2041.5	2285.1	2176.8	1723.5	1961.3	2022.6	2083	2512.8	2190.9	1945.3	2090.6	1985.9	1867.6	2054.2	2040.1
AT1G04090	26.1	24.1	23.1	21	15.9	8.4	29.1	21.7	40.1	18.1	8.9	15.5	39.6	29.2	19.6	12	4	13.2
AT1G04100	216.2	190.8	229.1	222.4	255.9	234.5	193.9	179.3	151.2	300.2	228.3	203.2	135.9	126.3	116.6	168	152.5	186.6
AT1G04110	11.1	7.7	7	24.1	15.9	12.2	2.9	10.8	3	13.1	16.9	3.1	8.1	0.9	4.7	13	6.9	6.6
AT1G04120	3042.3	3300.4	3223.6	1752	1846.7	1964.8	3060.3	3259.6	3331.3	1878.2	2100.9	2071.2	3256.6	3267.9	3426.2	1926.6	2198.8	2133.4
AT1G04130	136.8	180.2	160.8	130.1	141.8	136	163.8	192.1	166.2	125.5	160.8	140.3	166.3	166.8	139	143	157.5	107.5
AT1G04140	2357.4	2476.5	2451.9	2014.2	2063.9	2100.8	2426.3	2377	2388.1	1993.6	2231.9	1979.4	2355	2388.5	2450.5	1985.5	1979.9	1916.1
AT1G04150	1	0	0	14.7	6.9	15	2.9	3	0	3	3	1	0	3.8	0	1	6.9	1.1
AT1G04160	301.7	317	398.9	343	382.8	371.4	363.5	367.4	394.5	263	371.2	307.4	324.5	351.6	395.5	294.9	424.9	319.3
AT1G04170	1670.5	1644.9	1641.9	1788.7	1985.6	1845.7	1583.9	1614.5	1565	1617.2	1698	1848.4	1516.2	1514.7	1583	1632.6	1617.4	1716.4
AT1G04171	0	0	1	0	0	0	1	0	0	0	0	0	0	0	0	1	0	0
AT1G04180	47.3	50.1	43.2	22	29.8	25.3	44.6	28.6	34	22.1	49.6	46.4	86.2	77.3	70	32	35.7	42.8
AT1G04190	576.3	634.1	605.9	675.6	674.4	662.1	600	628.5	604.8	522	518	679.7	541.6	555.2	560.6	585.9	625	573.9
AT1G04200	1060	1035.9	1231	1120.4	1222.9	1249.2	1124.5	1127.9	1210.6	1109.3	1163.1	1147	1112.6	1147.1	1092.3	1138.7	1343.1	1251.1
AT1G04210	1136.5	1156.3	1227.9	1428.8	1557.1	1636.6	1079.9	1109.2	1232.6	1353.2	1405.2	1436.9	1125.8	1057.6	1193.1	1396.7	1417.4	1189.6
AT1G04220	2666.2	3210.8	3016.6	283.3	286.6	306.7	2699.7	3776.7	2977.8	253	196.5	336.3	3547.7	3562.9	3053.1	223.9	292.2	294.1
AT1G04230	236.3	258.2	249.2	194.1	192.4	183.8	235.6	278.8	271.3	239.9	243.1	181.5	251.5	238.5	272.4	218.9	207	200.8
AT1G04240	5609.9	6334.8	7547.5	5589.5	5502.5	5808.1	4099.4	5633.6	5080.5	2959.3	3596.5	2992.3	2034.5	2133	1869.3	2104.5	1530.3	1624.2
AT1G04250	8244.9	6950.6	8045.9	2415	2260.3	2651.3	8792.1	6672.8	6243	1336.1	1170	1418.3	6940.3	5694	5032.5	1050.8	925.1	969
AT1G04260	307.8	324.7	359.7	320	271.8	284.2	327.6	303.4	372.5	261	254.1	281.6	276.9	282.8	285.4	270.9	248.6	277.6
AT1G04270	2810	2911.1	2374.5	4046.3	4239.9	4183.8	2530	2708	2747.5	3394	3644.1	3992.9	2342.8	2568.5	2556.8	3394.2	3329	3889.2
AT1G04280	834.8	891.3	850.1	1021.8	986.8	998.8	807.5	866.9	817.1	1210.6	930.9	1124.3	973.6	930.3	903	1050.8	996.4	1161.1
AT1G04290	0	0	0	1	0	1.9	1	2	1	0	4	0	0	0	0.9	1	2	0
AT1G04300	1636.3	1571.7	1671.1	1630.3	1582.9	1724.7	1654.7	1599.8	1580	1768.8	1830	1562.7	1711	1688.1	1685.6	1592.6	1642.2	1568.2
AT1G04310	843.8	652.4	665.2	382.9	281.7	378	581.6	561.5	526.7	226.9	192.5	206.3	626.8	727.7	491.6	283.9	236.7	209.6
AT1G04330	11.1	22.2	13.1	141.6	107.1	144.4	13.6	21.7	10	57.2	61.5	124.8	14.2	15.1	13.1	103	97.1	139.4
AT1G04340	341.9	345.9	285.4	310.5	361	377	330.6	335.9	333.4	300.2	286.8	379.6	311.4	305.4	289.2	321.9	363.5	363.2
AT1G04350	118.7	133.9	117.6	844.5	855.9	937.9	120.2	105.4	96.1	980.8	778	697.3	118.7	134.8	142.7	903.8	899.3	830.7
AT1G04360	39.2	24.1	30.1	166.8	176.5	162.2	35.9	37.4	27	167.6	116.1	186.7	37.5	52.8	43.8	127	165.4	218.4
AT1G04370	0	0	2	65	93.2	124.7	0	1	0	62.2	57.6	67	0	0	0	54	65.4	62.6
AT1G04380	4	3.9	4	5.2	20.8	7.5	3.9	1	2	28.1	11.9	16.5	6.1	4.7	5.6	9	14.9	17.6
AT1G04390	240.4	233.2	262.3	151.1	148.8	125.7	258.8	201.9	223.3	159.6	156.8	125.8	247.5	234.7	212.7	191	174.3	149.2
AT1G04400	3205.2	3285	3461.7	2808.4	2585.6	2517.2	3098.1	3418.2	3596.6	3045.7	2933.6	2616.9	3555.8	3582.7	3526	2980.3	2794.1	2784.1
AT1G04410	17487.6	17933.8	14805.6	12836.5	12963.8	12835.5	17238.2	15513.8	16725.5	15771.5	12997.5	14163.3	17291.3	16942.6	15492.1	14408.7	13506	14352
AT1G04420	242.4	164.8	136.7	759.5	822.2	822.5	191.9	219.7	199.3	910.5	868.4	702.4	224.1	206.4	181.9	923.8	820.1	848.3
AT1G04425	12.1	9.6	7	68.2	83.3	92.8	11.6	15.8	13	58.2	52.6	92.8	8.1	15.1	17.7	59	60.4	76.8
AT1G04430	3393.3	3458.4	3692.9	6166.5	6713.5	6263	3234.8	3777.7	4070.2	5598.5	6546.9	6155.9	3331.7	3584.6	3519.5	5859.7	7705.8	6741.4
AT1G04440	2270.9	2344.5	2704.1	1878.9	1977.7	2133.6	2392.4	2447.9	2385.1	2203.4	2263.7	2106.3	2286	2152.8	2185.6	1834.6	2036.4	2017
AT1G04445	14.1	8.7	2	7.3	11.9	7.5	5.8	9.9	8	8	4	6.2	5.1	9.4	2.8	1	2	6.6
AT1G04470	1	1	2	0	0	0.9	1	3	0	0	0	0	0	0	0	0	0	0
AT1G04480	1392.9	1432.9	1223.9	2372	2572.7	2650.4	1187.5	1334.8	1398.8	2115.1	2388.7	2359	1147.1	1220.6	1306.9	2177.5	2111.7	2574.5
AT1G04490	129.7	129.1	119.6	98.6	74.4	143.5	155.1	133	124.2	115.4	69.5	59.8	115.6	125.4	135.3	111	107	102.1
AT1G04500	3	0	2	0	0	4.7	0	0	1	0	1	0	4.1	1.9	2.8	1	0	0
AT1G04510	844.8	804.6	736.6	865.5	980.9	979.1	812.3	832.4	862.1	889.4	925.9	984	818.5	813.4	810.6	901.8	879.5	896.6
AT1G04520	224.3	169.6	134.7	240.2	246	275.7	187.1	212.8	196.3	138.5	147.9	235.2	183.6	194.2	184.7	195	172.3	184.4
AT1G04530	492.8	448.1	425.1	385	420.5	453.9	526.4	394	432.6	405.6	356.3	368.2	476.7	422.3	446.8	424.9	331.8	380.8
AT1G04540	114.7	126.2	125.6	113.3	123	111.6	96.9	136.9	119.2	92.4	134	137.2	84.2	74.5	88.6	85	79.2	118.5
AT1G04550	916.2	910.6	1010.9	715.5	832.1	814.1	776.5	758.5	777	458.8	470.4	601.4	413.8	460	473.9	399.9	343.7	406
AT1G04555	104.6	99.3	131.6	143.7	117	110.7	98.9	151.7	132.2	131.5	87.3	132	134.9	111.2	113.8	110	110.9	126.2
AT1G04560	81.5	128.2	39.2	44.1	4	34.7	15.5	65	85.1	38.1	5	10.3	48.7	42.4	61.6	10	20.8	65.8
AT1G04570	29.2	40.5	29.1	11.5	6.9	15.9	24.2	31.5	23	12	5	11.3	26.4	23.6	30.8	4	6.9	8.8
AT1G04580	2	1	0	4.2	1	0.9	0	1	1	5	4	0	1	0.9	3.7	2	1	2.2
AT1G04590	209.2	162.9	158.8	326.3	325.3	306.7	176.4	216.7	192.2	304.2	316.6	321.8	197.8	193.2	198.7	290.9	271.4	283.1
AT1G04600	13.1	9.6	10	13.6	17.9	24.4	13.6	8.9	10	16.1	24.8	25.8	4.1	12.3	8.4	34	20.8	30.7
AT1G04610	72.4	68.4	57.3	32.5	20.8	29.1	51.4	38.4	32	37.1	21.8	17.5	30.4	19.8	45.7	26	22.8	23
AT1G04620	204.2	149.4	112.5	391.3	448.3	432.4	140.6	186.2	144.2	393.5	493.2	443.5	173.4	157.4	175.4	408.9	500.2	411.5
AT1G04630	362.1	338.2	298.4	410.2	383.8	471.7	386.8	346.7	353.5	458.8	457.5	455.9	354	316.7	296.6	451.9	432.8	512.5
AT1G04635	27.2	23.1	20.1	40.9	44.6	28.1	16.5	16.7	26	25.1	16.9	24.8	16.2	15.1	20.5	18	32.7	28.5
AT1G04640	61.3	69.4	48.2	310.5	339.2	309.5	64.9	73.9	53.1	282.1	314.6	345.5	75.1	69.7	49.4	302.9	278.3	340.2
AT1G04650	21.1	35.7	31.2	45.1	41.7	36.6	39.7	27.6	29	37.1	28.8	20.6	31.4	38.6	35.4	39	23.8	28.5
AT1G04660	4	8.7	12.1	1	1	2.8	7.8	6.9	15	9	2	3.1	2	6.6	5.6	4	5	6.6
AT1G04670	0	0	0	0	0	0	2.9	0	0	0	0	0	0	0	0	1	0	0
AT1G04680	2711.4	2636.4	2331.3	2527.2	3104.3	3087.4	3334.6	2865.6	2927.8	1692.5	1735.7	2883	3052.8	2704.2	2436.5	1981.5	2570.3	2611.8
AT1G04690	1480.4	1484	1320.4	1465.6	1449	1307.4	1494.8	1542.6	1417.8	1377.3	1392.3	1421.4	1570	1456.3	1327.4	1423.7	1423.3	1470.5
AT1G04700	57.3	43.4	47.2	45.1	49.6	47.8	46.5	42.4	47.1	30.1	49.6	60.9	48.7	47.1	39.2	41	49.5	54.9
AT1G04710	134.8	110.8	134.7	395.5	394.7	445.5	133.8	129	126.2	428.6	394	367.2	129.8	124.4	121.3	398.9	433.8	387.4
AT1G04730	114.7	83.8	101.5	136.4	147.8	132.2	85.3	130	94.1	118.5	91.3	131	103.4	103.7	89.5	108	108	97.7
AT1G04750	1927	1916.6	1962.5	1630.3	1809	1621.6	2053.1	1873.6	1934.5	1589.1	1575.9	1753.5	2001	1928.5	2023.3	1563.6	1729.4	1786.6
AT1G04760	37.2	49.1	56.3	53.5	45.6	40.3	56.2	48.3	43.1	35.1	26.8	77.4	50.7	54.7	47.6	37	53.5	42.8
AT1G04770	369.1	439.4	383.9	348.3	270.8	290.7	332.5	327	353.5	219.8	189.5	230	209.9	269.6	305	583.9	231.8	149.2
AT1G04778	59.3	59.7	49.2	44.1	44.6	36.6	56.2	59.1	41.1	34.1	29.8	33	31.4	44.3	31.7	22	24.8	30.7
AT1G04780	1237	1282.6	1268.1	1294.6	1192.1	1307.4	1310.6	1364.3	1245.6	1422.5	1362.6	1361.6	1402.7	1243.2	1416	1308.7	1408.4	1266.4
AT1G04790	410.3	348.8	415	474.2	425.5	468.9	362.5	411.8	340.4	429.6	491.2	455.9	375.3	393	361	449.9	458.6	435.7
AT1G04800	423.4	329.6	130.6	198.3	213.2	149.1	309.2	355.6	385.5	179.7	182.6	70.1	356	331.8	244.4	336.9	103	74.6
AT1G04810	1543.8	1624.7	1650	1347	1296.3	1349.6	1550	1553.5	1619.1	1416.4	1399.3	1363.6	1585.2	1573.1	1683.7	1359.7	1410.4	1253.2
AT1G04820	13753.3	12003.7	10437.5	7592.2	9114.6	8770.8	14375.7	11446.5	12407	5887.6	6678.9	8533.5	12919.1	11600.1	10643.3	6171.6	7875.2	8863.8
AT1G04830	529	493.4	531.6	270.7	282.7	265.4	504.1	481.7	501.6	343.3	318.6	316.7	520.3	500.5	476.7	284.9	340.7	311.7
AT1G04840	19.1	25.1	33.2	36.7	40.7	55.3	22.3	24.6	25	37.1	24.8	44.4	22.3	18.9	28	38	47.5	39.5
AT1G04850	1877.7	1697.9	1858	1772.9	1779.3	1775.4	1679.9	1892.3	1778.3	1707.5	1647.4	1798.9	1736.3	1790.9	1784.5	1629.6	1744.2	1834.9
AT1G04860	748.3	718.9	890.3	866.5	844	810.3	796.8	748.7	716.9	902.5	853.5	889.1	741.4	686.2	797.6	892.8	765.6	838.4
AT1G04870	525	589.7	545.6	850.8	920.4	874.1	439.1	502.4	493.6	655.5	779	845.8	428	410	494.4	667.8	754.7	780.3
AT1G04880	14.1	8.7	7	21	3	12.2	5.8	10.8	13	14.1	9.9	13.4	6.1	14.1	9.3	15	10.9	14.3
AT1G04900	102.6	83.8	106.5	209.8	214.2	243.8	104.7	93.6	105.1	158.6	207.4	235.2	95.3	111.2	92.3	181	200.1	198.6
AT1G04910	848.8	864.4	823	757.4	682.4	688.4	881.2	898.4	856.1	715.7	686.7	676.7	768.8	876.6	743.4	748.8	756.7	670.5
AT1G04920	25.1	35.7	16.1	25.2	12.9	15.9	19.4	25.6	25	10	14.9	4.1	12.2	23.6	11.2	8	7.9	13.2
AT1G04930	70.4	70.3	77.4	98.6	136.9	112.5	62	68	71.1	90.3	137	108.3	61.9	65	81.2	81	113.9	95.5
AT1G04940	1	0	0	1	1	1.9	1	0	2	2	2	0	1	0	1.9	2	2	5.5
AT1G04945	108.6	162.9	179.9	186.7	221.2	199.8	135.7	122.1	111.1	158.6	186.6	177.4	117.6	122.5	136.2	140	149.6	160.2
AT1G04950	366.1	343	345.7	335.7	313.4	348.9	320.9	315.2	349.5	340.3	333.4	329	366.1	366.7	389.9	338.9	347.7	290.8
AT1G04960	717.1	683.2	720.5	531.9	514.7	553.3	685.3	635.4	645.8	560.1	660.9	590	734.3	699.4	722	518.9	593.3	564.1
AT1G04970	847.8	771.9	807.9	438.5	418.5	438.9	838.5	762.4	789	547.1	535.9	398.2	849.9	769.1	769.6	479.9	454.6	516.9
AT1G04980	248.4	244.8	187.9	387.1	428.5	370.5	281.1	201	229.3	327.3	357.3	441.5	198.8	224.3	197.8	392.9	408.1	466.4
AT1G04985	364.1	363.3	394.9	474.2	408.6	461.4	352.8	353.6	328.4	481.8	491.2	398.2	383.4	430.8	412.3	464.9	428.9	453.2
AT1G04990	639.6	638.9	563.7	557.1	614.9	530.8	629.1	682.7	578.7	674.6	561.7	542.6	589.3	623	571.8	652.9	690.4	555.3
AT1G05000	232.3	214.9	175.9	203.5	195.4	232.6	219.1	254.1	210.3	224.9	211.4	206.3	188.6	178.1	184.7	233.9	173.3	211.8
AT1G05010	2905.5	2132.5	2729.2	2187.3	2368.4	1862.6	2905.2	2132.7	2849.7	2645.1	3113.2	1999	3144.1	3099.2	2642.6	1942.6	2125.5	2616.2
AT1G05020	112.6	96.4	111.5	77.6	62.5	57.2	109.5	87.7	125.2	106.4	70.5	65	112.6	104.6	104.5	70	89.1	75.7
AT1G05030	165.9	168.6	195.9	164.7	159.7	95.7	156.1	183.2	185.2	156.6	175.7	156.8	188.6	180	153.9	161	154.5	158
AT1G05040	2	0	0	0	0	0	0	0	0	0	0	0	1	1.9	0	0	0	1.1
AT1G05055	203.2	198.5	195.9	187.8	208.3	211	179.3	188.1	198.3	196.8	177.6	193.9	192.7	218.7	197.8	211	183.2	206.3
AT1G05060	256.5	233.2	247.2	224.5	243	180.1	270.5	267	250.3	272	222.3	234.1	321.5	249.8	258.4	269.9	237.7	237
AT1G05061	13.1	7.7	6	13.6	8.9	16.9	9.7	2	12	7	15.9	5.2	7.1	6.6	6.5	10	6.9	8.8
AT1G05065	26.1	17.3	18.1	10.5	12.9	18.8	14.5	20.7	17	9	13.9	18.6	12.2	10.4	14.9	15	7.9	6.6
AT1G05070	215.2	215.8	176.9	248.6	243	240.1	217.1	236.4	217.3	216.8	197.5	214.5	205.9	207.4	204.3	217	240.7	206.3
AT1G05080	0	0	0	0	0	0	0	1	0	0	0	2.1	0	0	0.9	0	0	0
AT1G05090	98.6	80	98.5	96.5	82.3	92.8	78.5	99.5	94.1	85.3	88.3	78.4	85.2	93.3	99.8	113	93.1	83.4
AT1G05100	58.3	64.6	109.5	35.7	64.5	38.5	78.5	81.8	64.1	39.2	40.7	38.2	36.5	68.8	71.8	40	48.5	69.1
AT1G05120	684.9	652.4	827	530.8	522.7	583.3	680.5	722.1	706.9	581.2	598.4	544.6	692.7	714.5	747.2	560.9	556.6	545.4
AT1G05135	1801.3	1962.9	1950.4	1145.6	1011.6	939.7	2138.4	2400.6	1980.6	1395.4	1661.3	1143.9	2521.3	2077.4	2097.9	1323.7	1180.6	1950.1
AT1G05140	254.4	204.3	167.8	330.5	305.5	355.4	202.6	257.1	220.3	373.4	269.9	325.9	249.5	237.5	207.1	458.9	395.2	344.6
AT1G05150	1164.6	1208.4	1092.3	774.2	763.7	724	1053.7	1255	1171.5	713.7	675.8	705.5	990.9	1073.6	1024.2	740.8	703.2	728.7
AT1G05160	133.8	122.4	111.5	132.2	122	125.7	160.9	99.5	158.2	138.5	142.9	116.6	132.9	124.4	163.2	148	118.9	120.7
AT1G05170	429.4	417.2	399.9	133.2	142.8	170.7	483.7	434.4	376.5	143.6	154.8	135.1	386.4	338.4	381.5	152	157.5	136.1
AT1G05180	779.4	742	667.2	719.7	751.8	663.1	703.8	670.8	643.8	724.8	746.3	713.8	683.6	653.2	673.5	704.8	690.4	741.9
AT1G05190	851.9	600.3	388.9	2532.5	2444.8	2330.6	746.4	759.5	785	2463.4	2361.9	1887.6	725.2	737.1	618.5	2839.3	2267.2	2325.4
AT1G05200	276.6	278.5	339.6	235	306.5	241	285	317.2	329.4	281.1	318.6	251.7	292.1	300.7	339.5	301.9	330.8	272.2
AT1G05205	271.5	214.9	186.9	261.2	252.9	236.3	229.7	244.3	201.3	229.9	230.2	269.2	244.4	242.2	230.4	245.9	225.8	283.1
AT1G05210	68.4	67.5	56.3	81.8	64.5	49.7	100.8	50.2	72.1	38.1	53.6	83.6	73	66	54.1	65	61.4	73.5
AT1G05220	3	14.5	11.1	12.6	8.9	12.2	12.6	7.9	9	10	11.9	16.5	8.1	8.5	10.3	19	10.9	9.9
AT1G05230	487.8	574.3	663.2	248.6	229.1	243.8	437.2	734.9	555.7	235.9	236.2	221.8	607.5	612.7	619.4	247.9	212	230.5
AT1G05240	0	1	0	2.1	0	0.9	0	0	0	2	1	0	1	0	0	1	3	0
AT1G05250	1	0	0	1	1	0.9	0	0	0	1	0	1	0	0	0	1	0	1.1
AT1G05260	6438.7	6540.1	6913.4	655.7	464.2	544.9	6216.5	7051.1	6591.5	645.5	538.9	699.3	8123.8	7351.1	7034.3	691.8	625	541
AT1G05270	823.7	708.3	740.6	647.3	558.4	655.6	772.6	828.4	755	701.7	659	614.8	756.6	712.6	757.4	666.8	616.1	647.5
AT1G05280	10.1	10.6	1	31.5	43.6	41.3	23.3	9.9	15	28.1	52.6	29.9	6.1	9.4	18.7	37	38.6	43.9
AT1G05290	0	0	0	0	0	0	0	0	0	0	0	0	0	0	0	2	0	0
AT1G05300	37.2	46.3	45.2	154.2	134.9	136	61.1	57.1	44.1	207.8	248.1	287.8	73	81.1	58.8	227.9	319.9	304
AT1G05310	373.1	312.2	300.5	199.3	182.5	214.8	336.4	269.9	242.3	187.7	156.8	241.4	378.3	329	295.7	167	207	256.8
AT1G05320	569.2	546.4	648.1	689.2	692.3	683.7	600	540.8	489.6	804.1	677.8	733.4	587.2	601.4	666	740.8	784.4	704.5
AT1G05330	4	1.9	7	0	0	2.8	6.8	6.9	1	1	0	0	5.1	10.4	3.7	4	1	1.1
AT1G05340	1038.9	1427.1	1519.4	423.8	457.2	536.5	977.1	1478.6	1305.7	657.5	671.9	506.5	1405.7	1525.1	1700.5	546.9	540.8	660.6
AT1G05350	620.5	592.6	588.8	593.8	658.6	604.9	544.8	590.1	595.8	566.2	549.8	612.7	576.1	581.6	583	603.9	593.3	595.9
AT1G05360	205.2	204.3	179.9	151.1	147.8	160.4	241.4	214.7	200.3	161.6	133	142.3	195.7	247	195	146	146.6	118.5
AT1G05370	41.2	41.4	47.2	43	32.7	44.1	40.7	46.3	37	23.1	22.8	53.6	49.7	35.8	47.6	29	34.7	40.6
AT1G05380	1141.5	1043.6	1274.2	1141.4	1125.7	1149.8	1053.7	1017.6	1090.4	1243.8	1132.3	1150.1	1067	1081.1	1098.8	1054.8	1082.6	1085.3
AT1G05385	86.5	82.9	38.2	176.2	144.8	161.3	68.8	94.6	71.1	146.6	188.6	177.4	62.9	76.3	59.7	178	171.4	161.3
AT1G05400	19.1	35.7	30.1	37.8	35.7	23.4	37.8	29.6	36	27.1	29.8	18.6	29.4	42.4	32.6	23	25.8	21.9
AT1G05410	204.2	226.4	216	345.1	257.9	289.8	204.5	229.5	193.2	271	255	314.6	204.9	203.6	247.2	261.9	237.7	252.4
AT1G05420	47.3	100.2	127.6	60.8	72.4	59.1	23.3	130	120.2	71.3	88.3	43.3	58.8	118.8	106.3	32	31.7	49.4
AT1G05430	360.1	369.1	346.7	323.1	336.2	323.6	350.9	390.1	357.5	328.3	292.8	360	338.7	365.7	313.4	381.9	343.7	315
AT1G05440	29.2	26	23.1	26.2	26.8	37.5	27.1	27.6	14	24.1	18.9	28.9	24.3	20.7	23.3	23	19.8	21.9
AT1G05450	22.1	54	34.2	29.4	28.8	34.7	6.8	29.6	46.1	24.1	7.9	36.1	36.5	47.1	37.3	11	21.8	26.3
AT1G05460	112.6	143.6	97.5	167.9	123	169.8	109.5	115.3	81.1	158.6	147.9	168.1	120.7	132	145.5	190	173.3	148.2
AT1G05470	353	370	387.9	371.4	299.5	307.6	341.2	306.4	316.4	248	217.3	335.2	317.4	346.9	334.9	285.9	228.8	264.5
AT1G05490	85.5	82.9	91.4	24.1	26.8	31.9	74.6	110.3	94.1	33.1	13.9	24.8	69	84.8	91.4	33	22.8	23
AT1G05500	995.7	1041.7	1034	765.8	763.7	735.3	932.5	988	956.2	846.2	790	833.4	971.6	1050	978.5	855.8	805.2	803.3
AT1G05510	6	27.9	0	4.2	0	3.8	30.1	3	12	2	1	3.1	10.1	22.6	6.5	2	2	3.3
AT1G05520	1277.3	1266.2	1348.5	1226.4	1166.4	1141.4	1271.8	1279.6	1307.7	1061.1	1015.2	1155.3	1218.1	1249.8	1158.5	1121.7	1059.8	1094.1
AT1G05530	9.1	3.9	1	6.3	8.9	7.5	10.7	3.9	14	21.1	18.9	19.6	4.1	16	21.5	23	12.9	9.9
AT1G05540	5	1	2	3.1	5	6.6	1.9	3	1	1	8.9	4.1	0	0.9	7.5	5	5	1.1
AT1G05550	1	1	0	0	0	0	1	0	0	0	0	0	2	1.9	0.9	0	0	0
AT1G05560	8	1	5	15.7	10.9	15.9	1.9	4.9	0	15.1	5	4.1	3	2.8	3.7	22	8.9	6.6
AT1G05570	4269.3	4003.8	4134	2277.6	2313.9	2183.3	4465.9	3431	3944.1	2914.2	2756.9	2701.5	4626.8	4130.3	4403.8	2731.4	2412.8	2329.8
AT1G05575	516.9	555	607.9	371.4	399.7	392	602.9	590.1	498.6	503.9	389	479.6	778.9	611.7	772.4	475.9	394.2	409.3
AT1G05577	8	13.5	7	10.5	9.9	2.8	7.8	3.9	3	3	7.9	4.1	1	9.4	7.5	3	7.9	8.8
AT1G05590	263.5	257.3	202	217.2	211.3	217.6	290.8	283.7	292.4	190.7	209.4	210.4	232.3	300.7	230.4	260.9	188.2	227.2
AT1G05600	89.5	80	79.4	62.9	58.5	65.6	86.3	98.5	81.1	61.2	48.6	65	103.4	85.8	75.6	80	59.4	58.2
AT1G05610	14.1	21.2	13.1	9.4	12.9	14.1	10.7	13.8	15	21.1	10.9	13.4	23.3	22.6	14	12	9.9	6.6
AT1G05615	0	0	0	0	0	0	0	0	2	0	0	0	0	0	0	0	0	0
AT1G05620	541.1	546.4	547.6	400.7	442.3	469.9	540.9	518.1	565.7	478.8	476.4	428.1	490.9	488.2	542	416.9	401.1	453.2
AT1G05630	278.6	265	321.6	352.5	357	382.6	300.5	248.2	237.3	317.2	298.7	322.9	220.1	230	239.7	347.9	345.7	299.6
AT1G05640	49.3	57.8	41.2	74.5	85.3	72.2	61.1	61.1	36	81.3	61.5	76.3	51.7	63.2	42.9	79	103	72.4
AT1G05650	5	0	0	0	0	0	12.6	9.9	19	6	2	2.1	17.2	21.7	44.8	11	9.9	4.4
AT1G05660	21.1	5.8	4	4.2	0	8.4	48.5	8.9	22	14.1	38.7	25.8	32.5	34.9	53.2	26	39.6	30.7
AT1G05670	155.9	133.9	112.5	119.6	123	129.4	109.5	129	118.2	147.6	87.3	122.7	119.7	137.6	128.7	123	82.2	99.9
AT1G05675	234.3	182.1	266.3	348.3	295.6	286	409.1	240.4	148.2	376.4	275.9	261	324.5	171.5	196.8	283.9	240.7	274.4
AT1G05680	209.2	203.3	80.4	152.1	156.7	183.8	151.2	231.5	110.1	200.8	113.1	87.7	98.4	100.9	150.2	146	104	80.1
AT1G05690	27.2	23.1	23.1	19.9	31.7	16.9	14.5	15.8	20	31.1	19.8	18.6	22.3	23.6	24.3	43	16.8	34
AT1G05700	108.6	79	91.4	114.3	59.5	58.1	157	64	90.1	72.3	55.6	104.2	140	112.2	158.6	88	78.2	52.7
AT1G05710	617.5	652.4	804.9	588.5	625.8	681.8	708.6	608.8	601.8	546.1	542.8	635.4	494.9	547.6	503.7	497.9	700.3	638.7
AT1G05720	131.8	122.4	139.7	111.2	90.3	93.8	178.4	147.8	144.2	82.3	96.3	111.4	129.8	140.4	137.1	99	111.9	131.7
AT1G05730	13.1	10.6	23.1	21	24.8	25.3	6.8	16.7	11	29.1	22.8	26.8	9.1	9.4	14.9	14	22.8	19.8
AT1G05740	0	2.9	3	0	1	0.9	1	0	2	0	4	1	2	0	0	0	0	0
AT1G05750	39.2	55.9	40.2	95.5	115	94.7	34.9	38.4	49.1	76.3	110.2	83.6	48.7	54.7	52.2	97	109	96.6
AT1G05770	38.2	55.9	47.2	57.7	54.5	54.4	59.1	36.4	36	76.3	62.5	74.3	56.8	40.5	52.2	53	57.4	72.4
AT1G05780	96.5	107	101.5	82.9	68.4	75	101.8	99.5	105.1	82.3	94.3	76.3	86.2	82	104.5	86	64.4	91.1
AT1G05785	142.8	150.3	127.6	69.2	65.5	72.2	136.7	136.9	133.2	87.3	81.4	80.5	161.3	131	127.8	82	72.3	84.5
AT1G05790	512.9	515.5	510.5	281.2	301.5	309.5	501.2	460	488.6	314.2	361.2	283.7	489.9	496.7	453.3	298.9	298.1	301.8
AT1G05800	7	4.8	5	25.2	24.8	26.3	2.9	3	7	44.2	28.8	21.7	7.1	0.9	4.7	25	29.7	50.5
AT1G05805	302.7	280.4	326.6	493.1	410.6	468.9	361.6	385.2	366.5	659.5	555.7	471.4	532.5	488.2	468.3	694.8	660.6	558.6
AT1G05810	389.2	341.1	401.9	200.4	226.1	195.1	413.9	434.4	386.5	254	199.5	239.3	451.3	428.9	366.6	205	265.4	255.7
AT1G05820	79.5	81.9	108.5	54.6	68.4	80.7	88.2	80.8	97.1	78.3	82.4	54.7	85.2	103.7	92.3	78	82.2	58.2
AT1G05830	815.6	836.4	1003.9	792.1	729	781.2	788.1	823.5	914.2	779	843.5	666.3	861.1	887.9	917.9	765.8	747.8	633.2
AT1G05835	231.3	152.3	79.4	24.1	30.7	10.3	160.9	143.8	145.2	23.1	18.9	13.4	187.6	138.6	128.7	20	15.8	9.9
AT1G05840	495.8	493.4	451.2	391.3	410.6	393.9	504.1	490.6	493.6	427.6	429.7	431.2	571	569.3	578.3	377.9	388.3	423.6
AT1G05850	18466.1	18695.1	18655.3	15419.4	15421.5	14871.6	19182.7	17954.8	18160.4	15339.8	15404.1	15860.1	19430.3	18181.1	16099.3	15431.5	17227.2	18244.5
AT1G05860	155.9	192.7	190.9	165.8	145.8	151.9	147.3	157.6	176.2	112.4	137	146.5	116.6	134.8	137.1	155	150.6	193.1
AT1G05870	525	398	352.7	172	195.4	170.7	526.4	522.1	479.6	193.7	151.8	222.8	579.1	594.8	467.3	210	190.2	172.3
AT1G05880	1	1.9	1	1	2	0.9	1	1	1	0	0	4.1	4.1	0	1.9	4	1	1.1
AT1G05890	2093.9	1786.5	1894.2	1142.4	1142.6	1197.6	2025	1958.3	1880.4	1352.2	1421.1	1139.8	2075.1	2269.7	2167.8	1217.7	1225.2	1263.1
AT1G05894	17.1	10.6	10	6.3	2	8.4	8.7	17.7	18	11	5	5.2	12.2	6.6	8.4	7	13.9	9.9
AT1G05900	194.1	176.3	198	115.4	140.8	155.7	163.8	157.6	156.2	149.6	160.8	123.8	174.4	159.3	172.6	136	121.8	121.8
AT1G05910	636.6	610.9	666.2	676.7	702.2	678.1	648.5	619.6	700.9	649.5	684.8	745.8	578.1	609.8	638	676.8	680.4	639.8
AT1G05920	0	0	0	0	0	0	0	1	0	3	0	0	0	0	0	0	0	0
AT1G05930	0	0	1	0	1	0.9	0	0	1	2	0	0	0	2.8	0	0	0	0
AT1G05940	743.2	761.3	756.7	632.6	629.8	631.2	760	774.3	708.9	750.9	672.9	630.2	821.5	726.7	724.8	704.8	694.3	692.5
AT1G05950	84.5	95.4	80.4	133.2	108.1	112.5	94	88.7	92.1	75.3	66.5	108.3	96.4	84.8	82.1	90	89.1	83.4
AT1G05960	1805.3	1712.3	1720.3	1717.3	1835.8	1830.7	1805.9	1818.4	1718.2	1815	2045.3	1671	1707.9	1686.2	1731.3	1448.7	1642.2	1597.8
AT1G05970	65.4	52	43.2	66.1	56.5	72.2	55.3	68	40.1	78.3	63.5	61.9	52.7	53.7	49.4	77	70.3	62.6
AT1G05990	2	0	1	3.1	4	2.8	0	0	0	1	1	6.2	0	0	2.8	6	3	2.2
AT1G06000	273.6	234.2	240.2	163.7	185.5	142.6	353.8	274.8	281.4	199.8	112.1	137.2	288	210.2	247.2	164	133.7	148.2
AT1G06010	95.5	100.2	84.4	68.2	70.4	66.6	102.8	67	85.1	81.3	91.3	78.4	98.4	72.6	97	93	69.3	122.9
AT1G06020	30.2	18.3	22.1	11.5	6	9.4	13.6	22.7	31	9	9.9	9.3	27.4	27.3	21.5	5	14.9	18.7
AT1G06030	4	1	3	2.1	0	0	0	10.8	4	2	3	1	5.1	2.8	2.8	2	1	0
AT1G06040	3561.3	2628.7	3193.5	1215.9	827.2	1082.3	4905.9	3450.7	3268.2	1855.1	742.3	877.8	4695.8	3688.3	3790.9	1874.6	912.2	928.4
AT1G06050	186.1	235.1	210	89.2	61.5	82.5	215.2	232.5	203.3	115.4	82.4	71.2	236.3	183.8	229.5	75	92.1	85.6
AT1G06060	552.1	486.6	545.6	302.1	243	265.4	592.3	506.3	584.8	379.5	272.9	269.2	628.8	625.9	577.4	309.9	278.3	286.4
AT1G06070	379.2	397	373.8	339.9	365	389.2	377.1	390.1	348.4	319.2	376.1	345.5	382.4	353.5	373.1	342.9	360.5	308.4
AT1G06080	501.9	261.1	221.1	128	117	140.7	317	311.3	402.5	65.3	90.3	93.9	395.5	562.7	429.1	77	110.9	76.8
AT1G06090	413.4	393.2	342.7	64	57.5	86.3	393.6	390.1	342.4	64.2	88.3	77.4	338.7	340.3	467.3	72	82.2	63.6
AT1G06100	0	1.9	1	7.3	3	0	1.9	0	1	0	6	0	0	0	0	0	0	1.1
AT1G06110	1124.4	991.6	981.7	507.8	416.6	449.2	1135.1	939.8	963.2	602.3	506.1	488.9	1073	1131.1	1036.3	519.9	507.1	527.9
AT1G06120	26.1	16.4	9	7.3	6.9	4.7	29.1	15.8	18	12	13.9	20.6	15.2	14.1	26.1	10	12.9	9.9
AT1G06130	334.9	345.9	411	412.3	384.8	423.9	381.9	354.6	437.6	447.7	435.7	413.6	361.1	377	381.5	443.9	449.7	439
AT1G06135	16.1	18.3	5	5.2	13.9	5.6	25.2	12.8	9	9	6.9	9.3	17.2	9.4	7.5	12	4	6.6
AT1G06140	33.2	27	29.1	31.5	25.8	29.1	35.9	23.6	26	21.1	31.8	26.8	33.5	25.4	27.1	25	23.8	26.3
AT1G06148	3	0	2	4.2	5	3.8	2.9	3.9	2	13.1	8.9	8.3	2	2.8	3.7	10	4	6.6
AT1G06150	36.2	26	23.1	31.5	37.7	41.3	25.2	42.4	20	40.2	46.6	32	28.4	30.2	37.3	48	38.6	52.7
AT1G06160	62.4	48.2	38.2	594.8	790.5	758.7	53.3	29.6	74.1	847.2	595.4	652.9	28.4	53.7	39.2	683.8	951.8	926.2
AT1G06170	7	7.7	5	9.4	7.9	5.6	4.8	5.9	6	8	10.9	14.4	12.2	5.7	6.5	11	4	11
AT1G06180	49.3	44.3	49.2	87.1	118	129.4	56.2	43.3	35	107.4	88.3	116.6	36.5	58.4	38.2	109	76.3	87.8
AT1G06190	314.8	305.5	247.2	702.9	794.4	664	265.6	348.7	299.4	730.8	680.8	602.4	314.4	319.5	331.1	794.8	665.6	679.3
AT1G06200	1101.3	1089.8	1048.1	881.2	835.1	741.8	1013	1044.2	1061.4	966.7	928.9	940.7	1093.3	1083	1052.2	933.8	881.5	1056.8
AT1G06210	542.1	554.1	534.6	570.7	615.9	567.4	617.5	608.8	538.7	545.1	576.6	515.7	622.7	581.6	577.4	548.9	616.1	549.8
AT1G06220	1038.9	1023.4	914.4	1508.6	1533.3	1584	966.5	1078.6	1008.3	1249.8	1443.9	1396.6	932.1	953.9	918.8	1285.7	1279.7	1223.6
AT1G06225	1	1	0	0	0	0	2.9	0	1	0	0	0	1	0.9	2.8	0	0	0
AT1G06230	1303.4	1357.7	1377.7	1263.1	1288.3	1248.3	1239.8	1305.2	1404.8	1157.4	1247.5	1222.3	1294.1	1273.4	1332	1202.7	1160.8	1145.7
AT1G06240	62.4	64.6	49.2	123.8	88.3	125.7	60.1	58.1	80.1	121.5	93.3	124.8	69	56.6	70	109	99	115.2
AT1G06250	29.2	22.2	14.1	27.3	23.8	20.6	18.4	17.7	17	12	18.9	20.6	17.2	17.9	21.5	12	20.8	18.7
AT1G06265	16.1	18.3	21.1	11.5	28.8	17.8	22.3	17.7	28	25.1	7.9	19.6	22.3	17.9	28.9	17	16.8	13.2
AT1G06270	51.3	68.4	57.3	74.5	78.4	83.5	48.5	68	50.1	59.2	62.5	79.4	53.8	50.9	55	54	68.3	69.1
AT1G06290	1236	1167.9	1050.1	1193.9	1159.4	1203.3	1249.5	1084.6	1182.5	1443.5	1210.7	1180	1256.6	1231	1166	1329.7	1297.5	1278.5
AT1G06310	0	3.9	1	8.4	12.9	13.1	2.9	1	1	8	9.9	10.3	3	0.9	4.7	10	15.8	5.5
AT1G06320	2	2.9	1	4.2	1	7.5	5.8	3.9	3	0	6	6.2	2	6.6	2.8	1	4	2.2
AT1G06330	9.1	13.5	4	6.3	5	9.4	9.7	5.9	12	3	4	6.2	11.2	6.6	2.8	7	12.9	1.1
AT1G06340	1	1.9	1	3.1	0	2.8	1	1	2	0	1	0	5.1	3.8	2.8	1	0	0
AT1G06350	279.6	167.7	112.5	37.8	34.7	43.1	207.4	304.4	247.3	65.3	30.8	30.9	184.6	230	176.3	46	48.5	42.8
AT1G06360	395.3	324.7	213	115.4	80.3	56.3	291.8	403.9	408.5	74.3	55.6	2.1	427	377	342.3	104	90.1	51.6
AT1G06370	40.2	46.3	62.3	48.3	46.6	58.1	35.9	37.4	60.1	53.2	59.5	51.6	52.7	66	55	52	55.5	58.2
AT1G06380	140.8	189.8	184.9	216.1	227.1	240.1	150.3	176.3	182.2	196.8	212.4	190.8	120.7	144.2	161.4	176	179.3	178.9
AT1G06390	1480.4	1203.6	1240	1582	1564.1	1544.6	1399.8	1349.5	1259.6	1514.8	1610.7	1423.5	1272.8	1280	1291	1364.7	1422.3	1352
AT1G06400	1713.8	1782.7	1822.8	1210.6	1285.4	1294.2	1696.4	1648	1712.2	1348.2	1567	1304.8	1796.2	1903	1722	1419.7	1443.1	1488.1
AT1G06410	4653.5	4725.6	5370	6348	6859.3	7113.6	4544.4	5080	5141.6	6841.2	7791.4	6300.3	4508.2	4680.8	4870.2	6561.5	7340.3	6889.6
AT1G06420	9.1	14.5	13.1	33.6	30.7	27.2	13.6	4.9	15	31.1	18.9	27.9	10.1	11.3	19.6	26	26.7	32.9
AT1G06430	626.6	422.1	429.1	1675.4	1704.9	2095.2	535.1	589.1	574.7	2101.1	1716.9	1534.9	580.1	569.3	505.6	1919.6	1914.6	1860.1
AT1G06440	44.3	75.2	50.2	46.2	65.5	70.3	43.6	49.3	75.1	59.2	67.5	77.4	55.8	55.6	45.7	62	59.4	87.8
AT1G06450	161.9	181.2	151.7	115.4	87.3	116.3	178.4	151.7	184.2	117.5	103.2	99	161.3	181.9	191.2	104	118.9	69.1
AT1G06460	179	191.8	143.7	1637.6	1355.8	995.1	191.9	233.5	199.3	1912.3	1820.1	1426.5	197.8	214	181.9	2190.5	1878.9	1447.5
AT1G06470	475.7	494.3	464.2	549.7	599	499.9	506	521.1	524.7	510	545.8	541.5	443.2	488.2	494.4	531.9	526.9	504.8
AT1G06475	49.3	47.2	46.2	32.5	34.7	62.8	34.9	37.4	39.1	51.2	29.8	41.3	31.4	51.8	66.2	57	51.5	68
AT1G06490	349	389.3	418	264.4	259.9	285.1	356.7	351.7	442.6	277.1	260	306.4	379.3	364.8	403	263.9	297.1	233.7
AT1G06500	89.5	107.9	90.4	154.2	135.9	121.9	83.4	100.5	93.1	140.5	158.8	127.9	116.6	122.5	110.1	162	147.6	136.1
AT1G06510	124.7	93.5	120.6	291.6	265.8	267.3	116.3	98.5	119.2	313.2	255	256.8	107.5	126.3	132.5	314.9	257.5	300.7
AT1G06515	194.1	200.4	216	209.8	217.2	196	226.8	217.7	214.3	191.7	231.2	186.7	187.6	239.4	200.6	234.9	217.9	243.6
AT1G06520	130.7	138.8	163.8	58.7	79.3	61	148.3	163.5	172.2	111.4	71.5	93.9	206.9	195.1	224.8	109	126.8	139.4
AT1G06530	836.8	874	903.4	972.5	948.2	982.9	862.7	957.5	904.2	1011.9	1063.9	1003.6	829.6	886	923.5	1054.8	985.5	1121.6
AT1G06540	4	7.7	10	5.2	4	7.5	5.8	9.9	2	4	2	1	12.2	2.8	4.7	11	7.9	8.8
AT1G06550	519	530	517.5	696.6	723	746.5	521.5	567.4	510.7	645.5	651	718.9	576.1	560.8	583.9	667.8	713.1	746.2
AT1G06560	115.7	156.1	129.6	263.3	266.8	298.2	145.4	114.3	131.2	201.8	244.1	289.8	143	165.9	158.6	212	241.7	239.2
AT1G06570	1441.2	1030.1	1138.5	562.3	542.5	617.1	1556.8	1228.4	954.2	1011.9	925.9	572.5	1420.9	1213.1	1095.1	723.8	603.2	818.7
AT1G06580	64.4	66.5	48.2	75.5	53.6	83.5	67.9	60.1	59.1	86.3	86.3	70.1	71	79.2	66.2	81	113.9	80.1
AT1G06590	169	190.8	213	260.2	281.7	276.7	185.1	157.6	197.3	217.8	267.9	237.2	180.5	170.6	195.9	224.9	236.7	249.1
AT1G06620	1707.7	1873.3	2318.2	1433	1618.6	1435.9	1799.1	1611.6	1866.4	1641.3	1962	1272.9	1535.5	1486.4	1935.6	1360.7	1633.3	1465
AT1G06630	532	584	701.4	573.8	615.9	650.9	542.8	567.4	666.9	624.4	650	507.5	519.3	566.5	634.3	626.9	629.9	582.7
AT1G06640	3795.6	4686.1	4779.1	6077.3	6626.2	6177.7	3900.7	4086.1	4249.5	6520	6323.6	6405.5	4211	4384.8	4281.6	5870.7	8015.8	8451.2
AT1G06645	65.4	36.6	47.2	61.9	64.5	58.1	40.7	49.3	46.1	75.3	60.5	50.5	45.6	46.2	47.6	86	84.2	60.4
AT1G06650	233.3	226.4	226.1	754.3	701.2	755	254.9	195	202.3	909.5	808.8	738.5	224.1	247	200.6	834.8	840.9	804.4
AT1G06660	55.3	38.5	42.2	76.6	101.2	120	37.8	45.3	44.1	60.2	60.5	114.5	45.6	49	50.4	74	103	98.8
AT1G06670	899.1	914.5	959.6	1190.7	1293.3	1257.7	813.3	913.2	906.2	1047	1141.3	1133.6	762.7	794.6	786.4	1044.8	1026.1	995.4
AT1G06680	3038.3	1431	997.8	16758	14394	15887.3	2276.1	2314.9	2274.9	21833.7	14543.7	12910.1	2134.9	2299.9	1736	21677	15110.5	15544.8
AT1G06690	157.9	112.7	142.7	643.1	757.7	847.8	138.6	157.6	144.2	811.1	670.9	638.5	147.1	154.6	154.8	729.8	787.4	766
AT1G06700	2798.9	2743.4	3080.9	1597.7	1596.8	1540	2788.9	2827.1	2761.6	1853.1	1709.9	1605	2882.4	2770.2	2791.9	1627.6	1734.3	1839.3
AT1G06710	84.5	66.5	89.4	88.1	111.1	117.2	74.6	85.7	94.1	86.3	105.2	101.1	84.2	80.1	82.1	85	82.2	73.5
AT1G06720	482.7	541.6	655.2	1096.3	1216.9	1217.3	471.1	480.7	600.8	815.1	1144.2	1091.3	389.5	537.3	542	920.8	930	861.5
AT1G06730	248.4	288.1	244.2	270.7	263.8	270.1	290.8	273.8	287.4	272	266	254.8	211	251.7	259.3	251.9	276.3	261.2
AT1G06740	67.4	72.3	63.3	112.3	104.1	115.4	64.9	80.8	67.1	134.5	124.1	130	77.1	93.3	86.8	115	117.9	113
AT1G06750	0	6.7	5	7.3	3	7.5	4.8	3	1	2	6	8.3	5.1	6.6	3.7	5	4	2.2
AT1G06760	2337.3	2303	1804.7	1969.1	1767.4	1781.9	2226.6	2034.2	1841.4	1619.2	1906.4	1844.3	2099.4	1915.3	1806.8	1716.6	1619.4	1802
AT1G06770	77.4	92.5	86.4	137.4	182.5	135.1	103.7	112.3	94.1	145.6	167.7	167.1	83.2	89.5	111	134	146.6	116.3
AT1G06780	667.8	677.4	754.7	406	373.9	406.1	645.6	605.8	619.8	420.6	466.4	407.4	653.2	643.8	646.4	409.9	413	381.9
AT1G06790	95.5	122.4	57.3	98.6	79.3	113.5	101.8	93.6	90.1	88.3	91.3	107.3	86.2	83.9	107.3	106	102	83.4
AT1G06800	581.3	678.4	744.6	507.8	452.3	460.5	703.8	595	639.8	620.4	630.2	525	747.5	652.3	635.2	445.9	593.3	620
AT1G06810	1	0	0	0	0	0.9	0	2	0	0	0	1	1	0.9	0.9	0	0	0
AT1G06820	299.7	266	317.5	500.4	545.5	537.4	259.8	314.2	275.4	537.1	580.6	506.5	304.3	238.5	257.5	531.9	523	487.3
AT1G06830	3	4.8	3	309.5	436.4	528	3.9	4.9	8	242.9	371.2	464.2	2	5.7	6.5	358.9	394.2	490.5
AT1G06840	1335.6	1342.3	1405.8	975.6	998.7	1099.2	1588.8	1429.3	1289.7	1135.4	1227.6	1241.9	1647.1	1502.4	1377.8	1040.8	1139	1196.2
AT1G06850	497.8	560.8	487.4	417.5	441.4	331.1	408.1	458.1	440.6	390.5	346.3	456.9	354	388.3	420.7	329.9	399.2	397.3
AT1G06860	1	0	0	0	0	0	1	0	0	0	0	0	0	0	0	0	0	0
AT1G06870	453.6	552.2	460.2	422.8	472.1	483.9	476	462	411.5	415.6	383.1	433.2	410.8	370.4	465.5	424.9	416	391.8
AT1G06890	1402	1324	1345.5	1478.2	1377.6	1282	1350.3	1397.8	1439.9	1356.2	1381.4	1488.4	1331.7	1346.9	1396.4	1312.7	1338.1	1358.6
AT1G06900	1020.8	1087	1105.3	1246.3	1096.9	1242.7	1029.5	1022.5	1059.4	1064.1	1231.6	1158.4	981.8	954.8	1106.3	1069.8	1136.1	1006.3
AT1G06910	82.5	68.4	75.4	74.5	42.6	62.8	56.2	57.1	63.1	57.2	61.5	77.4	76.1	61.3	71.8	50	63.4	49.4
AT1G06920	11.1	7.7	4	0	0	0.9	2.9	3.9	2	0	0	0	3	1.9	3.7	0	0	0
AT1G06923	1	2.9	3	4.2	2	8.4	2.9	0	3	6	4	14.4	3	1.9	2.8	9	9.9	6.6
AT1G06930	23.1	19.3	6	11.5	7.9	16.9	21.3	14.8	26	15.1	8.9	16.5	33.5	26.4	15.9	10	16.8	14.3
AT1G06950	1504.6	1411.7	1368.6	2718.2	2961.5	2722.6	1394.9	1549.5	1568	2707.4	2729.1	2579.7	1428	1543	1557.8	2831.3	2491	2603.1
AT1G06960	164.9	165.7	145.7	165.8	150.8	177.3	149.3	197	168.2	158.6	168.7	152.7	168.4	158.4	153	187	156.5	198.6
AT1G06970	4	6.7	2	3.1	6	2.8	3.9	2	5	3	4	4.1	5.1	6.6	4.7	4	3	0
AT1G06980	176	160	154.7	7.3	3	1.9	180.3	230.5	206.3	5	0	6.2	313.4	359.1	331.1	23	5	6.6
AT1G06990	0	0	0	0	1	0	0	0	0	0	0	0	0	0	0	1	0	0
AT1G07000	1489.5	1496.5	1784.6	1104.7	1190.2	1219.2	1692.5	1365.3	1434.8	1404.4	1342.7	1185.2	1749.5	1364.8	1610	1073.8	1244	1267.5
AT1G07010	107.6	50.1	49.2	472.1	566.3	769	91.1	91.6	115.1	598.3	520	558	81.1	99.9	96.1	581.9	601.2	577.2
AT1G07020	252.4	297.8	263.3	260.2	253.9	215.7	314.1	280.7	303.4	248	273.9	295	232.3	275.2	264.9	244.9	273.4	296.3
AT1G07030	434.5	422.1	441.1	449	463.2	438.9	451.7	431.5	406.5	435.7	542.8	399.2	377.3	424.2	382.5	387.9	412	439
AT1G07040	524	494.3	417	487.8	485	423	540.9	539.8	494.6	734.8	617.3	523	547.7	577.8	569	618.9	538.8	477.4
AT1G07050	16.1	3.9	15.1	29.4	7.9	9.4	19.4	23.6	14	11	9.9	8.3	15.2	15.1	18.7	29	8.9	12.1
AT1G07060	0	0	0	0	6	0.9	1	0	1	2	2	1	2	2.8	0.9	1	0	0
AT1G07070	104.6	119.5	111.5	173.1	183.5	153.8	111.5	113.3	101.1	144.6	143.9	167.1	101.4	115.9	107.3	138	126.8	181.1
AT1G07080	2315.2	2515	2453.9	1262	1230.8	1264.2	2244.1	2415.4	2425.1	1540.9	1251.4	1337.8	2407.7	2291.4	2195.8	1457.7	1380.7	1495.8
AT1G07090	402.3	538.7	497.4	583.3	600	613.4	421.7	491.5	498.6	560.1	582.5	718.9	541.6	627.7	562.5	512.9	499.2	668.3
AT1G07110	1055	869.2	922.5	1436.2	1325	1424.6	957.7	973.2	973.3	1764.8	1581.9	1387.3	962.5	1081.1	921.6	1656.6	1539.2	1484.8
AT1G07119	0	0	0	0	0	0	0	0	0	0	0	0	0	0	0	3	0	0
AT1G07120	4	2.9	8	9.4	6.9	12.2	2.9	1	5	8	11.9	4.1	5.1	7.5	9.3	10	20.8	4.4
AT1G07128	0	0	0	1	1	0	0	0	0	0	1	1	0	0	0	0	0	0
AT1G07130	3	2.9	2	6.3	4	2.8	4.8	2	2	5	8.9	5.2	6.1	3.8	0.9	10	3	3.3
AT1G07135	2179.4	2439.9	2230.8	3477.7	3279.9	3699.8	2763.7	2356.3	2167.8	4448.1	3339.4	4029	3649.1	2944.6	2962.6	4365	3744.9	4369.9
AT1G07140	4302.5	4401.8	4346	3918.3	4130.8	4048.7	4410.6	4195.4	4073.2	3999.3	4397.3	4038.3	4351	4225.5	4011.1	3744.1	4145.1	4369.9
AT1G07150	474.7	425.9	447.2	702.9	728	682.8	611.7	561.5	488.6	458.8	476.4	376.5	573	473.2	462.7	359.9	253.6	229.4
AT1G07160	338.9	257.3	295.4	14.7	13.9	9.4	352.8	292.6	250.3	16.1	16.9	23.7	437.1	246	211.7	19	15.8	9.9
AT1G07170	217.2	218.7	214	223.5	216.2	222.3	232.6	201	226.3	241.9	265	224.9	221.1	208.3	212.7	241.9	218.9	240.3
AT1G07175	13.1	5.8	4	2.1	4	4.7	15.5	12.8	8	4	6.9	4.1	7.1	10.4	12.1	1	3	2.2
AT1G07180	2	3.9	2	193	269.8	464.2	2.9	4.9	3	290.1	182.6	146.5	11.2	0	2.8	206	179.3	280.9
AT1G07200	579.3	614.8	737.6	580.1	609	686.5	693.1	756.5	721.9	891.4	819.7	800.4	889.5	966.1	898.3	996.8	934	973.4
AT1G07210	321.8	332.4	257.2	505.7	533.6	491.4	318.9	355.6	358.5	492.9	535.9	541.5	328.6	373.3	356.3	453.9	469.5	604.7
AT1G07220	302.7	305.5	381.8	525.6	624.8	604	308.3	355.6	338.4	566.2	558.7	616.8	359	340.3	366.6	536.9	538.8	599.2
AT1G07230	761.3	827.7	810.9	662	701.2	626.5	860.8	839.3	773	699.7	625.2	710.7	894.5	936.9	813.4	651.9	739.9	657.4
AT1G07240	1722.8	1632.4	1915.3	1763.5	1748.5	1634.7	1607.2	1611.6	1711.2	1988.6	2024.5	1688.5	1749.5	1566.5	1575.5	1602.6	1846.2	1898.5
AT1G07250	580.3	495.3	541.6	575.9	605	548.6	559.3	574.3	621.8	672.6	537.9	592.1	580.1	560.8	569.9	648.9	681.4	666.1
AT1G07260	326.9	385.4	373.8	372.4	375.9	406.1	268.5	295.5	395.5	515	491.2	577.6	382.4	440.2	429.1	494.9	516	643.1
AT1G07270	18.1	11.6	19.1	17.8	15.9	9.4	20.4	15.8	23	9	7.9	14.4	17.2	20.7	19.6	17	16.8	11
AT1G07280	215.2	140.7	151.7	419.6	302.5	310.4	161.9	198	204.3	509	477.3	421.9	213	201.7	175.4	874.8	573.5	467.5
AT1G07290	39.2	47.2	41.2	31.5	20.8	30.9	37.8	52.2	46.1	25.1	37.7	29.9	34.5	36.8	35.4	33	28.7	25.2
AT1G07300	60.3	58.8	90.4	48.3	54.5	54.4	53.3	68	56.1	52.2	48.6	80.5	81.1	99.9	64.4	65	52.5	59.3
AT1G07310	1023.8	1167.9	1234	767.9	785.5	752.2	1169.1	1074.7	1108.4	981.8	894.2	786	1185.6	1212.1	1109.1	904.8	942.9	904.3
AT1G07320	978.6	759.3	476.3	2666.8	2463.6	2397.2	884.1	851.1	1010.3	2656.2	2436.4	1923.7	893.5	916.2	797.6	2901.3	2330.6	2451.6
AT1G07330	1	1	1	1	1	1.9	0	0	2	2	3	6.2	3	0	0.9	0	0	0
AT1G07340	0	0	0	0	0	2.8	0	0	0	1	0	1	0	0	0	0	3	2.2
AT1G07350	762.3	777.6	787.8	790	981.9	1119.8	591.3	819.6	870.1	608.3	1007.3	704.5	712	901.1	814.3	754.8	986.5	904.3
AT1G07360	962.5	942.4	995.8	974.6	960.1	936.9	944.2	914.1	1027.3	948.6	939.8	923.2	904.7	928.4	872.2	838.8	958.8	909.8
AT1G07370	175	193.7	176.9	289.5	233.1	256	173.5	215.7	208.3	149.6	127	267.2	187.6	193.2	170.7	219.9	215.9	161.3
AT1G07380	527	501.1	530.6	379.8	410.6	443.6	589.4	493.5	494.6	462.8	332.5	450.8	593.3	507.1	513	413.9	456.6	364.3
AT1G07390	73.4	71.3	82.4	115.4	131.9	146.3	59.1	57.1	51.1	144.6	75.4	116.6	47.7	56.6	46.6	130	92.1	114.1
AT1G07400	43.2	50.1	38.2	47.2	105.1	118.2	61.1	80.8	71.1	39.2	173.7	54.7	86.2	63.2	45.7	51	134.7	109.7
AT1G07410	88.5	112.7	81.4	112.3	94.2	92.8	103.7	94.6	140.2	89.3	98.2	120.7	89.3	109.3	88.6	75	89.1	96.6
AT1G07420	857.9	753.5	756.7	794.2	695.3	675.3	823	793	775	690.6	674.8	712.8	712	727.7	656.7	769.8	760.7	725.4
AT1G07430	93.5	115.6	141.7	19.9	32.7	30.9	72.7	119.2	99.1	10	26.8	12.4	101.4	99	122.2	13	28.7	26.3
AT1G07440	72.4	27	30.1	375.6	347.1	333.9	76.6	66	48.1	383.5	382.1	349.7	51.7	61.3	56	454.9	496.2	412.6
AT1G07450	0	0	0	28.3	34.7	35.6	0	0	0	30.1	18.9	11.3	0	0.9	0	21	34.7	31.8
AT1G07470	506.9	477	568.8	379.8	357	373.3	512.8	492.5	482.6	360.4	385.1	374.4	531.4	499.6	501.9	339.9	391.2	418.1
AT1G07473	0	3.9	1	1	1	1.9	1.9	4.9	2	2	0	0	5.1	1.9	0.9	3	1	1.1
AT1G07476	0	0	0	0	0	0	0	3.9	0	0	0	0	0	0	0	0	1	0
AT1G07480	439.5	407.6	470.3	303.2	347.1	325.4	505	484.7	437.6	360.4	348.3	331.1	527.4	478.8	431.9	347.9	306.1	289.7
AT1G07500	22.1	24.1	26.1	58.7	42.6	61.9	33	26.6	26	72.3	36.7	48.5	11.2	27.3	27.1	50	45.6	57.1
AT1G07510	792.5	885.6	939.5	1083.7	1089	1177	881.2	917.1	930.2	1104.2	1159.1	1094.4	907.7	870	911.4	1014.8	1060.8	1149
AT1G07520	576.3	544.4	561.7	402.8	397.7	474.6	720.2	538.8	553.7	487.9	405.9	492	720.1	625.9	586.7	406.9	424.9	410.4
AT1G07530	782.5	761.3	755.7	733.3	727	795.3	786.2	774.3	773	874.4	757.2	790.1	843.8	837	794.8	865.8	816.1	722.1
AT1G07540	0	1	0	0	1	0	0	0	4	0	0	0	1	0	0	0	0	0
AT1G07550	16.1	23.1	17.1	5.2	3	9.4	29.1	13.8	20	12	7.9	3.1	24.3	28.3	28	6	7.9	6.6
AT1G07560	112.6	76.1	85.4	31.5	33.7	29.1	104.7	56.1	96.1	24.1	29.8	38.2	100.4	103.7	110.1	33	30.7	24.1
AT1G07570	745.2	668.7	800.9	174.1	202.3	195.1	834.6	648.2	641.8	187.7	159.8	183.6	809.3	647.5	610.1	186	147.6	199.7
AT1G07590	316.8	333.4	345.7	311.6	259.9	246.7	321.8	285.7	259.3	356.4	293.8	281.6	307.3	297.9	306	278.9	299.1	293
AT1G07610	2110	1868.4	1831.9	941	774.6	819.7	1749.7	1489.4	1560	814.1	557.7	874.7	1891.5	1909.6	2059.6	925.8	784.4	775.9
AT1G07615	90.5	88.7	74.4	157.4	150.8	178.2	85.3	78.8	77.1	165.6	209.4	188.8	91.3	83.9	91.4	168	155.5	187.7
AT1G07620	95.5	62.6	80.4	51.4	28.8	55.3	74.6	65	66.1	51.2	44.7	64	64.9	81.1	92.3	29	30.7	50.5
AT1G07630	913.2	835.5	986.8	582.2	572.3	501.8	997.5	890.5	813	593.3	544.8	614.8	876.3	838.9	759.3	467.9	510.1	605.8
AT1G07640	768.4	763.2	801.9	501.5	508.8	512.1	631.1	650.1	724.9	485.9	525	412.6	547.7	480.7	557.8	355.9	355.6	342.4
AT1G07645	5	7.7	3	3.1	8.9	1.9	7.8	8.9	3	3	2	7.2	11.2	10.4	5.6	4	2	9.9
AT1G07650	2911.6	2643.2	3117.1	1142.4	1318.1	1206.1	3578.9	3085.2	2763.6	1513.8	1533.3	1241.9	3813.4	3145.3	3096.9	1513.7	1666	1409.1
AT1G07660	324.8	320.9	327.6	307.4	364	341.4	352.8	295.5	329.4	298.1	298.7	343.5	340.8	339.3	301.3	309.9	320.9	301.8
AT1G07670	2229.7	2241.4	2383.5	2142.2	2195.8	2231.2	2395.3	2319.8	2375.1	2053.9	2295.4	2222.9	2558.9	2439.4	2478.5	2337.5	2501.9	2392.4
AT1G07680	2	1	1	0	0	0	0	2	0	2	0	0	1	2.8	0	0	0	0
AT1G07690	38.2	38.5	28.1	6.3	2	2.8	51.4	46.3	27	1	7.9	1	51.7	39.6	44.8	2	0	3.3
AT1G07700	134.8	99.3	118.6	495.2	503.8	496.1	114.4	117.2	80.1	586.2	435.7	500.3	88.2	96.1	110.1	533.9	489.3	523.5
AT1G07705	351	312.2	329.6	348.3	348.1	354.5	328.6	336.9	301.4	309.2	317.6	361	339.8	336.5	316.2	333.9	337.7	322.6
AT1G07710	28.2	19.3	25.1	16.8	18.8	10.3	26.2	18.7	20	17.1	8.9	22.7	33.5	25.4	40.1	17	28.7	20.9
AT1G07720	4098.3	5588	5157	889.6	1129.7	1147	4438.7	5635.6	4960.4	1456.6	1314.9	1507	5022.4	5433.9	5193.9	1403.7	1602.6	1952.3
AT1G07725	0	0	0	1	0	0	0	0	0	0	0	0	0	0	0	0	1	0
AT1G07740	40.2	32.8	38.2	59.8	64.5	61.9	24.2	36.4	22	74.3	57.6	62.9	31.4	39.6	55	53	67.4	71.3
AT1G07745	66.4	62.6	79.4	61.9	53.6	72.2	70.8	64	64.1	54.2	63.5	59.8	57.8	82.9	64.4	80	42.6	74.6
AT1G07750	926.3	978.1	716.5	406	417.5	358.3	1028.5	850.1	893.2	503.9	466.4	471.4	1012.2	913.3	917	472.9	411	442.3
AT1G07770	1919.9	1888.7	1625.9	1991.2	2023.3	2068.9	1774.9	1652	1797.3	1942.4	1884.6	1924.8	1627.8	1802.2	1876.8	2055.5	1925.5	2013.8
AT1G07780	104.6	124.3	90.4	252.8	280.7	267.3	94	90.6	92.1	170.7	189.5	219.7	80.1	78.2	75.6	176	207	173.4
AT1G07790	464.6	462.5	375.8	467.9	474.1	447.4	377.1	443.3	413.5	327.3	396	461.1	387.4	433.6	382.5	402.9	395.2	418.1
AT1G07795	2	0	1	2.1	2	1.9	0	2	1	2	1	4.1	1	0	0	1	3	0
AT1G07810	1774.1	1587.1	1717.3	1269.4	1255.6	1258.6	1589.8	1618.5	1612.1	1275.9	1307	1225.4	1631.9	1628.8	1623.1	1268.7	1225.2	1267.5
AT1G07820	853.9	818.1	601.9	744.8	801.4	754	749.3	689.5	735.9	578.2	687.7	763.3	686.6	666.4	680	736.8	673.5	730.9
AT1G07830	152.9	186.9	152.7	286.4	293.6	296.4	141.5	122.1	175.2	246.9	260	269.2	165.3	148	178.2	279.9	277.3	284.2
AT1G07840	322.8	294.9	295.4	355.6	348.1	363	310.2	372.4	290.4	284.1	388	389.9	283	282.8	298.5	339.9	336.8	338
AT1G07850	4	1.9	8	2.1	5	0.9	3.9	3	4	6	1	3.1	3	0	3.7	3	1	2.2
AT1G07860	1	0	1	0	0	0	0	0	0	0	0	1	0	0	0	0	0	0
AT1G07870	663.8	559.9	641.1	460.5	482	521.4	592.3	522.1	584.8	414.6	546.8	500.3	551.7	484.5	574.6	513.9	556.6	519.1
AT1G07880	79.5	99.3	112.5	264.4	395.7	381.7	71.7	105.4	81.1	279.1	272.9	431.2	115.6	112.2	130.6	260.9	390.2	445.5
AT1G07885	3	2.9	1	8.4	6	15.9	0	3	3	9	8.9	7.2	0	1.9	3.7	9	12.9	15.4
AT1G07890	9375.4	11177.9	10582.2	14114.3	15097.2	14788.1	10530.2	10822	10953.1	18379.5	18417.1	16351.1	11929.2	11301.3	11662	16312.3	18510.8	20180.3
AT1G07900	6	5.8	6	17.8	15.9	18.8	1.9	8.9	7	32.1	33.7	33	11.2	15.1	19.6	39	67.4	56
AT1G07901	49.3	58.8	34.2	38.8	26.8	16.9	45.6	58.1	50.1	35.1	46.6	41.3	50.7	50	52.2	51	40.6	27.4
AT1G07910	359	297.8	367.8	323.1	380.9	354.5	288.9	344.8	312.4	329.3	373.1	410.5	334.7	323.3	316.2	379.9	360.5	304
AT1G07920	4116.4	4550.2	3855.7	4879.3	5126.6	5080.4	4017	3970.8	4100.3	4300.5	4709	5070.8	3931.1	3993.6	3928.1	4466	4709.7	5085.4
AT1G07930	4400.1	4698.6	4128	7496.7	8183.3	8261.6	4187.6	4285	4691	6915.5	7501.6	8284.9	4051.8	4119.9	4344.1	6707.5	7518.6	7996.8
AT1G07940	4052.1	4710.1	4077.7	4923.3	4926.3	5369.2	3883.3	4119.6	4363.6	4629.8	4426.1	5204.9	3884.4	4102	4128.6	4548	4697.8	5242.3
AT1G07950	238.4	241.9	224.1	206.7	240	226	234.6	251.2	254.3	240.9	251.1	215.6	267.8	258.3	238.8	229.9	250.6	200.8
AT1G07960	501.9	497.2	540.6	306.3	404.7	342.3	480.8	558.5	515.7	374.4	408.9	393	501	482.6	461.7	365.9	347.7	377.5
AT1G07970	187.1	199.5	155.8	280.1	245	290.7	170.6	162.5	189.2	242.9	324.5	321.8	184.6	191.3	200.6	256.9	274.4	293
AT1G07980	228.3	216.8	199	249.7	248.9	233.5	176.4	221.6	231.3	226.9	230.2	271.3	204.9	230.9	208.9	242.9	253.6	237
AT1G07985	350	321.8	272.3	59.8	61.5	92.8	308.3	432.4	311.4	92.4	64.5	30.9	244.4	322.4	330.2	57	53.5	56
AT1G07990	1213.9	1219	1266.1	955.7	972	959.4	1293.1	1242.2	1095.4	1123.3	1038.1	979.9	1340.8	1215.9	1215.4	1031.8	965.7	989.9
AT1G08000	120.7	101.2	118.6	149	102.2	107.9	132.8	146.8	136.2	139.5	118.1	135.1	135.9	140.4	123.1	121	109.9	125.1
AT1G08005	2	1	0	0	1	0	1	1	1	1	0	0	0	0	0.9	1	0	1.1
AT1G08010	483.8	467.4	421	470	489	415.5	449.8	461	561.7	384.5	447.6	394	455.4	465.6	461.7	331.9	374.4	425.8
AT1G08030	449.6	476	417	481.5	464.2	364.8	435.2	422.6	427.6	350.3	357.3	360	377.3	437.3	361	309.9	306.1	282
AT1G08035	2	4.8	1	1	0	0	1	2	0	2	0	0	1	1.9	1.9	0	1	0
AT1G08040	560.2	555	497.4	452.2	419.5	468	498.3	528	415.5	365.4	308.6	339.4	299.2	312	311.6	325.9	395.2	332.5
AT1G08050	275.6	282.3	279.4	161.6	183.5	166.9	326.7	272.9	272.4	245.9	177.6	172.3	294.1	244.1	253.7	186	263.5	267.8
AT1G08060	490.8	462.5	533.6	427	439.4	392	451.7	476.8	483.6	438.7	450.6	432.2	461.5	477.9	444	447.9	434.8	388.5
AT1G08070	21.1	17.3	19.1	47.2	42.6	40.3	16.5	25.6	18	46.2	28.8	42.3	19.3	33	27.1	31	39.6	30.7
AT1G08080	1	0	0	1	0	0	0	0	1	0	0	0	0	0	0	0	1	0
AT1G08090	28.2	27.9	14.1	2.1	4	3.8	23.3	15.8	32	6	1	6.2	16.2	16	24.3	7	4	4.4
AT1G08110	947.4	981.9	842.1	1101.5	1027.5	1097.3	947.1	859	979.3	1200.6	1158.1	1044.9	918.9	956.7	920.7	1173.7	1151.9	1139.1
AT1G08115	0	1	0	0	0	0	0	0	0	1	0	0	0	0	0	0	0	0
AT1G08120	0	0	1	1	1	0	1	0	1	0	2	0	1	3.8	0.9	2	0	1.1
AT1G08125	264.5	231.3	237.1	218.2	276.7	224.1	245.2	275.8	223.3	238.9	237.2	243.4	241.4	256.4	227.6	246.9	239.7	229.4
AT1G08130	410.3	431.7	414	635.7	757.7	672.4	392.6	408.8	416.5	556.1	573.6	732.4	375.3	398.7	454.3	594.9	617.1	557.5
AT1G08140	0	1	0	0	0	0	0	0	0	1	0	1	2	0	0	1	0	0
AT1G08150	0	1.9	0	0	0	0	0	0	0	0	0	0	0	0	0	0	0	0
AT1G08160	985.6	978.1	954.6	396.6	451.3	385.5	910.2	944.7	1012.3	480.8	403.9	404.3	970.6	981.2	953.3	458.9	447.7	436.8
AT1G08165	1	2.9	0	16.8	10.9	15.9	1	1	1	5	1	6.2	1	2.8	0.9	12	6.9	2.2
AT1G08170	0	3.9	0	0	0	1.9	0	0	0	4	0	0	1	0	0.9	0	0	0
AT1G08180	81.5	84.8	97.5	61.9	49.6	44.1	107.6	78.8	90.1	66.3	59.5	60.9	128.8	111.2	114.7	77	70.3	65.8
AT1G08190	3734.3	3594.3	3811.4	2803.1	2837.5	2987.1	3692.3	3763.9	3518.5	3080.8	2676.5	2942.8	3740.4	3623.2	3486.8	2931.3	3184.3	3069.5
AT1G08200	5824.2	6039.9	6465.3	4820.5	5331.9	5107.6	5376.1	6149.8	6447.3	4853.6	5461.2	4937.7	6264.8	6176.6	6026.9	4882.9	6060.7	5368.5
AT1G08210	400.3	345.9	350.7	315.8	366	349.8	382.9	357.6	378.5	385.5	450.6	315.6	423.9	382.7	390.8	344.9	355.6	364.3
AT1G08220	109.6	114.7	113.5	174.1	161.7	155.7	89.2	120.2	129.2	134.5	150.8	158.8	90.3	88.6	109.1	144	132.7	132.8
AT1G08230	590.4	616.7	670.2	354.6	438.4	414.5	502.1	685.6	637.8	580.2	564.7	395.1	716	701.3	664.2	536.9	520	606.9
AT1G08250	262.5	277.5	296.4	189.9	226.1	198.8	280.1	340.8	323.4	246.9	223.3	244.5	295.1	295	263.1	206	257.5	277.6
AT1G08260	316.8	326.7	343.7	610.6	639.7	642.4	274.3	296.5	340.4	443.7	560.7	549.8	313.4	324.2	336.7	489.9	533.9	525.7
AT1G08270	17.1	17.3	25.1	24.1	20.8	20.6	20.4	27.6	29	30.1	10.9	9.3	12.2	23.6	28	13	16.8	18.7
AT1G08280	205.2	229.3	188.9	201.4	177.5	172.6	171.6	196	196.3	164.6	128	180.5	192.7	201.7	204.3	140	133.7	140.5
AT1G08290	22.1	33.7	50.2	315.8	388.8	408.9	30.1	35.5	35	363.4	384.1	469.3	38.5	38.6	49.4	329.9	521	489.4
AT1G08300	57.3	53	47.2	168.9	221.2	204.5	44.6	44.3	60.1	141.5	279.9	154.7	50.7	57.5	55	140	206	222.8
AT1G08310	41.2	48.2	56.3	13.6	12.9	13.1	41.7	44.3	43.1	13.1	9.9	12.4	59.8	60.3	48.5	7	17.8	15.4
AT1G08315	465.7	484.7	517.5	488.9	528.6	504.6	485.7	462	456.6	677.6	595.4	549.8	500	494.8	461.7	511.9	601.2	612.4
AT1G08320	435.5	399.9	420	103.9	100.2	85.3	444	402.9	364.5	139.5	124.1	120.7	481.8	478.8	411.4	104	109	115.2
AT1G08340	171	161.9	200	237.1	267.8	257	130.9	154.7	161.2	286.1	262	269.2	166.3	153.6	176.3	197	227.8	323.7
AT1G08350	199.1	194.7	148.7	204.6	190.4	210.1	209.4	165.5	201.3	226.9	214.4	212.5	220.1	214.9	219.2	210	205	198.6
AT1G08360	1926	1950.4	1669.1	2791.6	3101.4	2898	1886.4	1819.4	1855.4	2409.2	2714.2	3033.6	1687.7	1770.1	1898.3	2628.4	2441.5	2913.6
AT1G08370	631.6	646.6	652.2	763.7	746.8	756.8	701.8	661	681.9	744.9	735.4	755	700.8	637.2	625.9	773.8	769.6	777
AT1G08380	1137.5	591.7	380.8	6826.4	5424.2	5689	649.5	949.6	926.2	8867	5897.9	4824.3	768.8	890.7	715.5	8957.9	5570.4	5905.2
AT1G08390	22.1	16.4	10	26.2	37.7	32.8	19.4	16.7	13	32.1	29.8	24.8	10.1	17	22.4	37	29.7	50.5
AT1G08400	105.6	112.7	114.6	143.7	172.6	136.9	111.5	82.7	104.1	142.5	137	147.5	105.5	115.9	114.7	164	160.5	165.7
AT1G08410	211.2	216.8	209	518.2	508.8	482.1	182.2	200	196.3	365.4	436.7	437.4	182.6	183.8	202.4	379.9	355.6	436.8
AT1G08420	2198.5	2189.3	2108.2	1646	1628.5	1539	2162.6	2218.4	2106.7	1669.4	1789.3	1611.2	2101.5	2136.8	2104.4	1654.6	1700.6	1566
AT1G08430	123.7	136.8	125.6	307.4	255.9	268.2	132.8	153.7	114.1	155.6	147.9	159.9	163.3	139.5	120.3	141	137.7	95.5
AT1G08440	0	1	0	3.1	1	0.9	0	1	1	5	1	5.2	0	0	0.9	0	2	2.2
AT1G08450	1207.9	1169.8	1266.1	1047	972	931.3	1317.4	1123	1065.4	859.3	939.8	1045.9	1144	1115.1	1095.1	950.8	940.9	991
AT1G08460	591.4	568.5	554.7	414.4	422.5	396.7	631.1	562.5	549.7	462.8	538.9	472.4	686.6	655.1	551.3	512.9	487.3	515.8
AT1G08465	27.2	27.9	15.1	25.2	18.8	15.9	12.6	28.6	39.1	6	14.9	7.2	32.5	27.3	14.9	35	14.9	2.2
AT1G08470	277.6	283.3	213	231.8	215.2	226	235.6	213.8	247.3	199.8	200.5	220.7	229.2	281.8	239.7	216	245.6	241.4
AT1G08480	1375.8	1552.4	1453	1077.4	1094.9	1151.7	1374.6	1374.2	1367.8	1017.9	978.5	1081	1444.2	1466.6	1370.3	1146.7	1081.6	1177.5
AT1G08490	553.1	531.9	492.4	589.6	689.3	621.8	614.6	489.6	507.7	729.8	646.1	613.7	555.8	548.6	498.1	663.8	636.9	676
AT1G08500	1336.6	1146.7	1196.8	92.3	113.1	97.5	1277.6	1192.9	934.2	115.4	101.2	111.4	1295.2	1080.2	1008.4	156	155.5	135
AT1G08510	3727.2	3966.2	3830.5	3022.4	3100.4	3250.6	4308.8	3961.9	3672.7	2891.1	3028.8	2822.1	4859.1	4266	4042.8	3079.3	3771.7	3174.8
AT1G08520	1189.8	885.6	803.9	2698.2	2829.6	2572.5	1010.1	970.3	1036.3	3054.7	2879	2403.4	1042.6	1075.5	1048.5	3095.3	2779.2	2537.2
AT1G08530	91.5	127.2	115.6	140.6	150.8	162.2	113.4	107.4	117.2	122.5	87.3	125.8	122.7	129.1	105.4	157	149.6	148.2
AT1G08540	318.8	242.8	224.1	893.8	796.4	783.1	295.7	397	329.4	893.4	756.2	734.4	310.3	355.3	298.5	990.8	843.9	761.6
AT1G08550	143.8	120.5	130.6	662	524.7	475.5	132.8	162.5	144.2	703.7	639.1	544.6	172.4	199.8	137.1	818.8	660.6	498.2
AT1G08560	546.1	577.2	655.2	438.5	545.5	614.3	558.4	532.9	567.7	384.5	349.3	574.5	602.4	592.9	541	425.9	437.8	577.2
AT1G08570	879	817.1	891.3	814.1	753.8	802.8	860.8	982.1	953.2	855.3	841.6	849.9	972.6	999.1	932.8	1035.8	1014.2	961.3
AT1G08580	466.7	479.9	495.4	583.3	595.1	583.3	447.8	465	468.6	406.6	429.7	527.1	373.2	381.7	498.1	444.9	429.9	530.1
AT1G08590	176	195.6	117.6	47.2	60.5	54.4	226.8	222.6	173.2	126.5	72.4	98	248.5	264.9	223.9	101	99	65.8
AT1G08600	839.8	724.6	859.2	775.3	839.1	845	739.6	701.4	724.9	770	771.1	822.1	643	703.2	754.6	812.8	792.4	706.7
AT1G08610	63.4	113.7	98.5	192	177.5	157.6	68.8	75.9	84.1	134.5	132	158.8	73	89.5	88.6	113	128.8	124
AT1G08620	860.9	822	905.4	880.2	851	884.4	893.8	863.9	888.1	870.3	846.5	826.2	857	903.9	860	848.8	879.5	812.1
AT1G08630	130.7	61.7	89.4	74.5	82.3	82.5	148.3	98.5	121.2	265	202.5	101.1	184.6	159.3	142.7	185	160.5	117.4
AT1G08640	443.5	364.2	395.9	804.6	994.8	936	341.2	417.7	397.5	752.9	809.8	978.9	335.7	350.6	348.9	813.8	933	982.2
AT1G08650	1298.4	1266.2	1350.5	320	409.6	375.1	1502.5	1246.1	1244.6	366.4	278.9	269.2	993.9	1053.8	1066.2	324.9	392.2	317.2
AT1G08660	554.2	512.6	552.7	506.7	580.2	483	561.3	523.1	536.7	460.8	553.8	504.4	521.3	505.2	485.1	475.9	475.4	488.3
AT1G08670	147.8	170.6	184.9	34.6	16.9	13.1	181.3	166.5	144.2	16.1	11.9	20.6	148.1	168.7	150.2	16	10.9	9.9
AT1G08680	1193.8	1309.6	1288.2	946.3	950.1	881.6	1248.5	1195.9	1225.6	993.8	962.6	969.6	1361.1	1292.3	1294.7	970.8	1006.3	938.3
AT1G08700	586.3	580.1	556.7	472.1	473.1	481.1	656.3	550.7	566.7	453.7	418.8	430.1	627.8	547.6	580.2	412.9	447.7	470.8
AT1G08710	145.8	154.2	168.8	138.5	144.8	141.6	161.9	164.5	131.2	131.5	193.5	157.8	151.1	174.4	169.8	154	144.6	158
AT1G08720	574.3	538.7	645.1	951.5	1206	1147	626.2	594	629.8	1154.4	1418.1	1108.8	716	600.4	597	1095.7	1148.9	1096.3
AT1G08730	6	6.7	3	11.5	4	8.4	3.9	3	4	6	3	6.2	1	1.9	2.8	4	8.9	3.3
AT1G08750	230.3	217.8	208	213	191.4	188.5	222	218.7	220.3	226.9	169.7	200.1	214	219.6	182.8	227.9	173.3	199.7
AT1G08760	726.1	750.7	695.4	391.3	346.1	349.8	681.5	781.2	648.8	377.4	303.7	373.4	675.5	657.9	647.4	437.9	367.5	386.3
AT1G08770	652.7	734.3	768.7	359.8	371.9	337.6	677.6	674.8	765	455.7	436.7	344.5	746.5	747.5	698.7	411.9	415	459.8
AT1G08780	173	167.7	219.1	236	220.2	232.6	208.4	195	192.2	217.8	240.2	214.5	199.8	161.2	192.2	234.9	212	270
AT1G08790	0	0	2	0	0	0	0	0	0	0	0	0	0	0	0	0	0	0
AT1G08800	2184.4	2152.7	2990.5	1927.2	1870.5	1812.9	2182	2106.1	2529.3	2505.6	2877	2205.3	2703.9	2652.4	2762	1873.6	2115.6	2358.3
AT1G08810	33.2	34.7	37.2	110.2	91.2	70.3	47.5	43.3	40.1	131.5	92.3	109.3	27.4	38.6	29.8	143	89.1	113
AT1G08820	1036.9	1086	1142.5	963.1	973	923.8	1081.8	1076.7	1226.6	966.7	995.4	969.6	1254.6	1195.2	1259.3	994.8	1132.1	1090.8
AT1G08830	4546.9	5008.9	5347.9	535	669.5	565.5	4468.8	4910.6	4868.3	756.9	600.4	511.6	5152.2	4635.5	4760.1	518.9	579.4	492.7
AT1G08840	53.3	74.2	56.3	140.6	173.6	148.2	53.3	48.3	71.1	116.4	131	115.5	64.9	64.1	79.3	140	123.8	120.7
AT1G08845	70.4	69.4	62.3	93.4	109.1	91.9	75.6	55.2	72.1	113.4	108.2	109.3	45.6	56.6	62.5	89	90.1	81.2
AT1G08860	5	6.7	6	12.6	21.8	16.9	12.6	7.9	8	17.1	18.9	20.6	5.1	5.7	9.3	19	17.8	16.5
AT1G08880	1168.7	1226.7	1177.7	790	882.7	763.4	1093.4	1200.8	1262.6	819.1	866.4	979.9	1277.9	1186.7	1149.2	958.8	823.1	955.8
AT1G08890	1691.6	1859.8	2197.6	393.4	359	302.9	1402.7	2074.6	1751.3	497.9	610.3	495.1	2044.7	1656.1	1691.2	470.9	457.6	424.7
AT1G08900	173	153.2	130.6	317.9	307.5	272	178.4	144.8	124.2	372.4	397	285.7	159.2	150.8	172.6	349.9	335.8	299.6
AT1G08910	349	345.9	363.8	403.9	542.5	475.5	309.2	385.2	410.5	614.4	626.2	532.2	373.2	402.5	392.7	602.9	695.3	593.7
AT1G08920	2589.7	2819.5	3263.8	2002.7	2055	2004.2	3072.9	2875.4	2836.7	2349	1952.1	1675.1	2795.2	2329.1	3101.6	2324.5	2216.7	1735
AT1G08930	7806.4	7696.4	10192.3	14185.7	15194.4	14983.2	10696.9	7749.5	8724.2	17979.9	18191.8	15343.4	13376.5	10315.4	11804.7	15791.4	19584.5	21182.3
AT1G08940	459.6	512.6	568.8	714.4	803.4	710	599.1	482.7	498.6	1008.9	1074.8	797.3	587.2	496.7	625	779.8	874.6	1073.3
AT1G08960	284.6	317	343.7	290.6	266.8	214.8	275.3	326.1	356.5	231.9	198.5	266.1	319.5	294.1	274.2	256.9	269.4	253.5
AT1G08970	839.8	822.9	831	569.7	656.6	562.7	841.4	799.9	765	574.2	543.8	570.4	823.5	847.4	832.1	599.9	572.5	637.6
AT1G08980	313.8	251.5	215	382.9	335.2	329.2	327.6	278.8	290.4	449.7	450.6	311.5	341.8	307.3	265.9	480.9	479.4	401.7
AT1G08985	0	0	0	0	0	0	1.9	0	0	0	0	0	0	0	0	0	0	0
AT1G08990	118.7	91.5	56.3	43	31.7	48.8	96.9	93.6	68.1	46.2	45.7	58.8	94.3	98	120.3	36	49.5	26.3
AT1G09000	122.7	164.8	174.8	143.7	167.6	186.6	138.6	182.2	147.2	151.6	121.1	169.2	145	179.1	153	138	165.4	197.5
AT1G09010	974.5	1040.7	818	1193.9	1084	1097.3	1082.8	978.2	909.2	1404.4	1083.7	1131.5	1034.5	1193.3	983.2	1404.7	1258.9	1084.2
AT1G09020	1155.6	1174.6	1054.1	894.9	966	860	1088.6	1128.9	1182.5	899.4	927.9	886	1173.4	1134.8	1091.4	940.8	862.7	837.3
AT1G09030	0	0	0	0	1	0	0	0	0	1	0	0	0	0	0	0	0	0
AT1G09040	55.3	32.8	36.2	86	82.3	82.5	61.1	65	59.1	92.4	76.4	98	64.9	49	67.2	86	79.2	82.3
AT1G09050	58.3	49.1	42.2	74.5	109.1	77.8	50.4	65	36	104.4	88.3	101.1	41.6	60.3	52.2	77	99	76.8
AT1G09060	629.6	518.4	627	804.6	923.4	815.9	655.3	613.7	630.8	763.9	933.9	771.6	634.9	591	569.9	895.8	888.4	744
AT1G09070	13499.9	14902.3	16441.5	14417.5	16024.5	16719.2	13772.7	13152.6	15379.8	16662.9	16944.3	14079.8	15530.7	13527.7	15255.1	14615.6	17530.2	16858.5
AT1G09080	21.1	15.4	18.1	7.3	3	7.5	11.6	18.7	18	25.1	6	11.3	10.1	8.5	13.1	9	4	14.3
AT1G09090	248.4	259.2	260.3	157.4	112.1	137.9	271.4	171.4	225.3	201.8	204.4	189.8	191.7	257.3	238.8	162	135.7	132.8
AT1G09100	448.6	491.4	380.8	567.6	519.7	480.2	414.9	449.2	435.6	466.8	493.2	594.1	427	478.8	462.7	515.9	493.3	523.5
AT1G09130	631.6	613.8	531.6	1856.9	2044.1	1986.4	620.4	639.3	659.8	2170.3	2142.6	1940.2	642	589.1	564.3	2100.5	2067.1	2135.6
AT1G09140	1477.4	1523.5	1799.7	878.1	977.9	981	1440.5	1608.6	1496.9	947.6	1042	949	1503.1	1524.1	1481.3	853.8	975.6	971.2
AT1G09150	476.7	451.9	448.2	497.3	402.7	470.8	470.1	456.1	516.7	465.8	434.7	494.1	431	445.8	457.1	517.9	454.6	453.2
AT1G09155	20.1	20.2	20.1	8.4	6.9	7.5	19.4	24.6	24	8	13.9	8.3	8.1	17.9	19.6	8	5	2.2
AT1G09157	2	5.8	5	4.2	4	1.9	6.8	2	2	6	1	4.1	1	0	5.6	1	6.9	0
AT1G09160	846.8	903.9	954.6	753.2	805.3	830	816.2	916.1	953.2	682.6	726.4	722	786	867.2	865.6	677.8	810.2	742.9
AT1G09170	28.2	17.3	24.1	12.6	19.8	22.5	19.4	18.7	20	23.1	33.7	29.9	24.3	24.5	22.4	27	13.9	5.5
AT1G09176	0	2.9	1	0	0	0.9	3.9	1	0	0	0	0	0	0.9	0.9	1	2	2.2
AT1G09180	9.1	15.4	13.1	2.1	1	2.8	10.7	12.8	10	11	2	4.1	14.2	16	13.1	8	3	4.4
AT1G09190	37.2	46.3	35.2	93.4	64.5	79.7	38.8	42.4	53.1	60.2	75.4	70.1	38.5	42.4	41	57	70.3	72.4
AT1G09195	171	169.6	230.1	52.5	56.5	76	183.2	167.5	164.2	74.3	82.4	78.4	178.5	210.2	212.7	94	75.3	76.8
AT1G09200	834.8	762.2	648.1	780.5	816.3	815	688.2	769.3	775	535.1	615.3	792.2	708.9	731.4	646.4	728.8	671.5	836.2
AT1G09210	1595.1	1696	1371.6	2632.1	2499.3	2555.7	1652.8	1543.6	1646.1	2321.9	2258.7	2638.5	1449.3	1584.5	1577.4	2575.4	2578.2	2473.6
AT1G09220	11.1	9.6	30.1	23.1	18.8	29.1	18.4	18.7	14	20.1	32.7	20.6	15.2	25.4	25.2	25	16.8	16.5
AT1G09230	227.3	249.6	229.1	150	171.6	166.9	219.1	219.7	234.3	190.7	166.7	155.8	222.1	226.2	219.2	165	163.4	154.7
AT1G09240	8	8.7	4	7.3	2	0	7.8	6.9	4	13.1	4	2.1	8.1	3.8	7.5	8	2	2.2
AT1G09250	1277.3	1265.2	1448	869.7	812.3	842.2	1129.3	1144.6	1208.6	732.8	704.6	659.1	939.2	952.9	910.4	532.9	467.5	533.3
AT1G09270	1913.9	1833.8	1755.5	1471.9	1466.9	1474.3	1837.9	1839.1	1870.4	1422.5	1527.3	1542.1	1800.2	1779.6	1697.7	1439.7	1477.8	1575.9
AT1G09280	416.4	390.3	367.8	337.8	346.1	331.1	424.6	370.4	402.5	318.2	353.3	352.8	446.3	423.2	458	329.9	296.1	383
AT1G09290	70.4	58.8	65.3	77.6	61.5	79.7	77.5	73.9	71.1	84.3	70.5	91.8	76.1	81.1	70	91	74.3	79
AT1G09300	142.8	200.4	169.8	184.6	217.2	176.3	161.9	179.3	193.2	180.7	198.5	211.5	145	164.9	203.4	181	226.8	216.2
AT1G09310	38236.7	55521.5	50361.7	12203.9	12927.1	13033.4	35859.6	55061.3	45450.5	11554.3	9192.7	12460.4	40554.3	46441.1	42983.8	12289.2	13609	13603.5
AT1G09320	141.8	130.1	168.8	150	148.8	181	134.7	159.6	174.2	211.8	204.4	161.9	145	163.1	201.5	193	198.1	190.9
AT1G09330	763.3	801.7	737.6	647.3	640.7	564.6	796.8	789	790	648.5	605.4	694.2	751.5	792.7	714.5	632.9	671.5	706.7
AT1G09340	315.8	247.6	162.8	5853.9	5756.4	6669.1	260.8	308.3	277.4	6099.4	5370.9	5143	297.2	320.5	277	6403.5	6193.4	5977.6
AT1G09350	1704.7	1032	1813.8	198.3	145.8	130.4	1294.1	996.9	1002.3	69.3	95.3	65	583.2	181.9	139	16	8.9	4.4
AT1G09360	0	0	2	0	0	0	0	0	0	0	0	0	0	0	0	0	0	0
AT1G09370	0	0	0	0	0	0.9	0	0	0	0	0	1	0	0.9	0	0	0	0
AT1G09380	19.1	32.8	20.1	21	27.8	20.6	31	12.8	14	19.1	17.9	28.9	28.4	14.1	14.9	20	12.9	18.7
AT1G09390	296.7	313.2	233.1	189.9	190.4	194.1	339.3	301.4	311.4	265	225.3	204.2	378.3	313.9	316.2	329.9	330.8	305.1
AT1G09400	13.1	14.5	9	3.1	11.9	13.1	18.4	15.8	19	3	6	5.2	12.2	8.5	13.1	10	5	11
AT1G09410	22.1	17.3	33.2	24.1	22.8	27.2	18.4	15.8	15	37.1	34.7	29.9	27.4	21.7	18.7	23	37.6	34
AT1G09415	138.8	92.5	118.6	327.3	276.7	317	145.4	131	92.1	355.4	276.9	289.8	129.8	123.5	111.9	326.9	281.3	311.7
AT1G09420	69.4	68.4	88.4	129	92.2	86.3	76.6	73.9	87.1	86.3	92.3	84.6	87.2	86.7	70.9	87	84.2	74.6
AT1G09430	2515.3	2221.1	2186.6	1434.1	1288.3	1297.1	2524.2	2117.9	2095.7	1779.8	1606.7	1425.5	2601.5	2300.8	2110.9	1551.6	1459.9	1473.8
AT1G09440	157.9	115.6	149.7	221.4	217.2	219.5	117.3	149.7	118.2	242.9	191.5	214.5	154.2	124.4	153	264.9	276.3	234.8
AT1G09450	44.3	38.5	32.2	75.5	68.4	84.4	34.9	50.2	36	58.2	56.6	93.9	58.8	39.6	46.6	64	78.2	68
AT1G09460	1128.4	1349.1	1159.6	863.4	886.7	995.1	1290.2	1286.5	1345.7	1141.4	906.1	1044.9	1453.4	1682.5	1550.3	1173.7	1120.2	1119.4
AT1G09470	22.1	16.4	11.1	73.4	99.2	103.2	19.4	21.7	20	76.3	75.4	149.6	33.5	12.3	28.9	80	106	128.4
AT1G09480	141.8	152.3	154.7	172	204.3	218.5	134.7	189.1	175.2	224.9	193.5	207.3	140	172.5	172.6	168	188.2	205.2
AT1G09483	0	0	0	0	0	0	0	0	0	0	0	0	0	0	0.9	1	0	0
AT1G09486	45.3	73.2	87.4	31.5	25.8	16.9	63	64	54.1	31.1	40.7	30.9	40.6	53.7	51.3	23	26.7	13.2
AT1G09490	311.8	322.8	323.6	403.9	351.1	372.3	318.9	337.9	300.4	458.8	359.3	393	343.8	340.3	312.5	466.9	394.2	349
AT1G09500	4	6.7	1	29.4	71.4	51.6	1.9	2	3	49.2	88.3	35.1	2	5.7	1.9	57	61.4	58.2
AT1G09510	0	0	0	0	0	0	1	0	0	1	0	0	0	0	0	0	0	0
AT1G09520	282.6	225.5	223.1	331.5	288.6	292.6	253	200	247.3	293.1	291.8	299.1	265.7	251.7	243.5	297.9	282.3	308.4
AT1G09530	1417.1	1185.2	1338.5	243.4	212.2	189.4	1197.2	1317	1604.1	269	241.2	225.9	2446.3	2562.8	1986.9	417.9	324.9	257.9
AT1G09540	284.6	261.1	313.5	42	16.9	18.8	271.4	299.5	210.3	28.1	26.8	39.2	319.5	297.9	208.9	24	17.8	20.9
AT1G09560	5415.8	5462.7	5234.3	3143	3006.1	3106.2	5374.1	4877.1	4993.4	3670.1	3021.9	3511.2	5427.1	5261.4	5461.6	3014.3	3301.2	3802.5
AT1G09570	8697.5	6920.7	5777	2815.7	2727.5	2620.4	7557.2	8753.3	7067.1	3183.2	2980.2	2710.7	7405.8	7466.1	6401.9	2683.4	2834.7	2588.8
AT1G09575	249.4	286.2	263.3	505.7	594.1	614.3	223.9	295.5	299.4	577.2	590.5	533.3	217	185.7	246.3	546.9	583.4	542.1
AT1G09580	117.7	83.8	79.4	178.3	173.6	176.3	129.9	96.5	93.1	150.6	163.7	209.4	95.3	90.5	90.5	182	227.8	205.2
AT1G09590	1743.9	1775.9	1419.9	3294.1	3632	3669.8	1622.7	1698.3	1729.2	2571.9	3142	3606.1	1353	1521.3	1548.5	2821.4	3019.9	3572.1
AT1G09600	15.1	14.5	5	17.8	12.9	24.4	16.5	17.7	7	23.1	14.9	20.6	11.2	8.5	18.7	20	11.9	9.9
AT1G09610	48.3	48.2	61.3	60.8	45.6	65.6	58.2	52.2	56.1	70.3	58.6	66	42.6	43.4	47.6	71	57.4	66.9
AT1G09620	2372.5	2307.9	2296.1	3295.2	3345.3	3315.3	2222.7	2195.7	2368	3327.8	3189.6	3165.6	2205.9	2260.3	2289.1	3183.3	3161.6	3112.3
AT1G09630	280.6	251.5	236.1	410.2	433.4	449.2	285	289.6	300.4	378.5	392	443.5	295.1	311	305	430.9	438.8	545.4
AT1G09640	4496.6	4879.7	4556	5348.2	5618.6	5308.3	4401.9	4248.6	4609.9	4863.6	5268.7	5278.1	4171.5	4423.5	4159.4	4561	4933.5	5289.5
AT1G09645	508.9	490.5	557.7	499.4	482	514.9	495.3	503.4	509.7	560.1	482.3	508.5	504.1	490.1	528.9	488.9	538.8	613.5
AT1G09650	1	8.7	4	6.3	4	3.8	5.8	11.8	12	3	2	6.2	11.2	6.6	7.5	9	2	5.5
AT1G09660	407.3	412.4	355.7	513	532.6	543	411	446.2	382.5	453.7	419.8	515.7	336.7	390.2	386.2	483.9	468.5	414.8
AT1G09665	1	1.9	0	7.3	6	1.9	0	2	0	0	1	1	0	0	0	0	0	0
AT1G09680	26.1	21.2	16.1	55.6	56.5	48.8	11.6	26.6	25	30.1	34.7	52.6	15.2	17.9	27.1	34	40.6	46.1
AT1G09690	2277	2447.6	1780.6	4222.5	4357	4490.5	2249.9	2223.3	2387.1	3527.5	3927.9	4173.4	2008.1	2119.8	2052.2	3736.1	3858.9	4445.6
AT1G09700	151.9	161.9	145.7	217.2	217.2	230.7	124.1	150.7	129.2	181.7	191.5	211.5	136.9	130.1	164.2	223.9	213	212.9
AT1G09710	123.7	130.1	119.6	57.7	67.4	56.3	142.5	131	132.2	62.2	66.5	65	183.6	150.8	148.3	68	103	74.6
AT1G09720	0	0	0	0	0	0	0	0	0	1	0	0	0	0	0.9	0	1	0
AT1G09730	847.8	820	961.7	740.7	731.9	782.2	870.5	833.4	780	731.8	743.3	780.8	841.8	813.4	809.7	805.8	759.7	692.5
AT1G09740	2349.4	2454.3	2380.5	719.7	666.5	620.9	2537.8	2214.4	2288.9	831.2	650	790.1	2545.7	2494	2384.3	702.8	713.1	733.1
AT1G09750	978.6	731.4	509.5	299	278.7	246.7	1070.2	984.1	975.3	195.8	214.4	122.7	908.7	768.2	607.3	392.9	211	186.6
AT1G09760	462.6	467.4	393.9	632.6	615.9	642.4	405.2	468.9	459.6	500.9	555.7	568.3	441.2	454.3	472	590.9	525.9	560.8
AT1G09770	2448.9	2107.4	2130.3	2453.8	2391.2	2526.6	2215	2301.1	2156.8	2433.3	2564.4	2377.6	2275.9	2297	2285.4	2393.5	2419.7	2322.1
AT1G09780	3071.5	3232.9	2988.5	5292.6	5389.4	5022.2	3106.8	2944.4	3331.3	4934.9	4638.5	5175	2629.9	2839.9	2835.7	4446	4677	4992.1
AT1G09790	1	0	1	0	0	0	1	0	0	0	0	0	0	0	0	1	0	0
AT1G09794	63.4	79	62.3	44.1	54.5	50.6	74.6	67	79.1	58.2	58.6	38.2	69	62.2	70	54	74.3	54.9
AT1G09795	220.3	218.7	151.7	948.4	998.7	1023.2	192.9	251.2	220.3	805.1	1097.6	1030.5	198.8	221.5	203.4	950.8	1092.5	1043.6
AT1G09800	41.2	52	50.2	78.7	97.2	69.4	57.2	54.2	54.1	31.1	41.7	58.8	49.7	56.6	53.2	64	53.5	56
AT1G09810	159.9	233.2	211	246.5	290.6	265.4	189	165.5	179.2	210.8	274.9	255.8	179.5	166.8	166	243.9	245.6	238.1
AT1G09812	27.2	31.8	25.1	17.8	16.9	28.1	20.4	51.2	25	16.1	13.9	15.5	18.3	23.6	19.6	16	19.8	11
AT1G09815	334.9	294.9	269.3	353.5	352.1	391.1	287.9	246.3	281.4	368.4	381.1	367.2	286	294.1	297.6	329.9	323.9	411.5
AT1G09820	29.2	42.4	53.3	79.7	65.5	76.9	49.4	51.2	61.1	94.4	84.4	77.4	55.8	49	50.4	77	77.3	66.9
AT1G09830	363.1	409.5	318.5	392.4	430.4	371.4	368.4	339.8	319.4	382.5	355.3	372.4	347.9	305.4	313.4	374.9	340.7	410.4
AT1G09840	1388.9	1409.8	1516.3	1161.3	1203.1	1160.1	1362	1398.8	1437.9	1002.8	1049	1170.7	1255.6	1266.8	1228.5	1060.8	1046.9	1029.4
AT1G09850	492.8	590.7	524.5	857.1	937.3	911.6	435.2	560.5	518.7	854.3	862.4	909.8	459.4	541	492.5	788.8	920.1	936.1
AT1G09860	10.1	4.8	11.1	3.1	4	4.7	5.8	3.9	6	4	2	4.1	7.1	5.7	12.1	4	7.9	4.4
AT1G09870	856.9	942.4	945.6	503.6	526.6	492.4	806.5	875.7	917.2	563.2	572.6	546.7	851.9	842.7	833.9	508.9	476.4	592.6
AT1G09880	38.2	37.6	41.2	36.7	26.8	30	38.8	43.3	39.1	27.1	16.9	32	36.5	30.2	35.4	35	29.7	21.9
AT1G09890	146.8	151.3	195.9	167.9	153.7	168.8	159.9	159.6	174.2	123.5	106.2	169.2	173.4	158.4	175.4	141	147.6	151.4
AT1G09900	117.7	88.7	73.4	159.5	142.8	161.3	97.9	130	107.1	161.6	131	123.8	109.5	93.3	102.6	140	128.8	108.6
AT1G09910	403.3	344	376.8	299	315.4	306.7	401.3	354.6	334.4	398.5	369.2	376.5	379.3	410	367.5	379.9	343.7	330.3
AT1G09920	736.2	742.9	755.7	483.6	410.6	454.9	772.6	760.5	671.9	489.9	452.5	478.6	809.3	783.3	783.6	529.9	502.2	503.7
AT1G09930	59.3	76.1	73.4	7.3	6.9	11.3	33.9	50.2	63.1	14.1	8.9	5.2	72	61.3	84	8	7.9	8.8
AT1G09932	434.5	390.3	527.6	416.5	410.6	471.7	463.4	362.5	467.6	470.8	549.8	451.8	483.8	363.8	542	516.9	561.6	519.1
AT1G09940	1539.8	1488.8	1757.5	2434.9	2688.8	2636.3	1890.3	1468.7	1595.1	3140	2947.4	2473.5	2038.6	1478.9	1773.3	2626.4	2842.6	2618.4
AT1G09950	1302.4	1464.7	1809.8	986.1	1024.5	1001.6	1208.8	1071.8	1764.3	900.5	1133.3	958.3	1054.8	1168.8	1291	789.8	1078.6	1015.1
AT1G09960	344	397	412	318.9	347.1	368.6	377.1	319.2	365.5	329.3	287.8	379.6	355	379.9	422.6	315.9	414	402.8
AT1G09970	10899.1	12183.9	13196.8	15593.5	16891.4	16620.7	11167.1	10762.9	12307.9	20895.1	22751.9	18001.5	11695.9	11707.6	12457.6	17650.9	22945.1	22332.3
AT1G09980	891.1	854.7	896.3	756.4	723	733.4	826.9	889.5	909.2	647.5	726.4	604.5	785	755	788.2	604.9	664.6	583.8
AT1G09995	170	187.9	206	94.4	127	118.2	143.5	189.1	196.3	121.5	121.1	97	182.6	151.8	167	114	137.7	133.9
AT1G10000	17.1	26	16.1	10.5	15.9	11.3	15.5	14.8	14	13.1	15.9	21.7	14.2	29.2	28	17	19.8	25.2
AT1G10010	0	0	0	2.1	0	0	1	0	0	1	0	0	0	0	0	0	0	0
AT1G10020	633.6	737.2	656.2	498.3	504.8	640.6	476.9	619.6	600.8	476.8	586.5	471.4	474.7	641.9	614.7	556.9	628.9	609.1
AT1G10030	180	157.1	125.6	171	169.6	196.9	157	168.4	160.2	157.6	161.8	188.8	170.4	146.1	150.2	152	162.4	151.4
AT1G10040	238.4	200.4	282.4	64	77.4	69.4	338.3	241.3	209.3	64.2	79.4	77.4	198.8	149.9	172.6	75	77.3	63.6
AT1G10050	455.6	475.1	468.3	352.5	380.9	378	489.5	430.5	457.6	377.4	390	381.6	487.8	433.6	444	355.9	417	406
AT1G10060	135.8	90.6	64.3	46.2	28.8	35.6	92.1	128.1	161.2	29.1	44.7	44.4	94.3	157.4	106.3	72	44.6	27.4
AT1G10070	779.4	564.7	574.8	124.8	136.9	122.9	647.5	743.7	688.9	675.6	548.8	234.1	832.7	819.1	710.8	383.9	257.5	294.1
AT1G10090	1726.8	1869.4	2382.5	1108.9	1220.9	1157.3	1646	1885.4	2131.7	1305	1674.2	1248.1	2131.9	1975.6	2090.4	1140.7	1373.8	1231.3
AT1G10095	114.7	102.1	98.5	81.8	82.3	91	80.5	117.2	91.1	96.4	84.4	75.3	114.6	115.9	103.5	80	97.1	75.7
AT1G10100	1	0	0	0	0	0	0	0	0	0	0	0	1	0	0.9	0	0	0
AT1G10110	13.1	12.5	9	8.4	5	3.8	11.6	11.8	3	4	8.9	9.3	19.3	20.7	14	7	3	9.9
AT1G10120	341.9	285.2	209	203.5	192.4	216.6	304.4	297.5	304.4	203.8	195.5	180.5	334.7	316.7	342.3	269.9	273.4	187.7
AT1G10130	1117.4	1028.2	1046.1	849.8	821.2	864.7	1180.7	1008.7	1057.4	855.3	814.8	969.6	1082.2	1054.7	1062.5	836.8	834	758.3
AT1G10140	1287.3	1492.6	1445	709.2	636.7	654.6	1234	1416.5	1414.8	915.5	1044	682.8	1460.5	1543	1465.4	917.8	798.3	787.9
AT1G10150	248.4	314.1	238.2	501.5	459.2	531.8	296.6	265	277.4	580.2	492.2	370.3	279.9	290.3	303.2	536.9	514.1	473
AT1G10155	4	4.8	6	5.2	4	0.9	5.8	3	10	6	5	4.1	15.2	3.8	8.4	2	2	6.6
AT1G10160	215.2	202.4	189.9	124.8	124	125.7	199.7	189.1	230.3	159.6	151.8	139.3	282	271.5	263.1	183	142.6	114.1
AT1G10170	1249.1	1207.4	1318.4	1803.4	1812	1781.9	1303.8	1235.3	1241.6	1981.6	2097	1833	1231.3	1251.7	1230.4	1701.6	1889.8	1786.6
AT1G10180	381.2	384.5	332.6	425.9	408.6	415.5	386.8	387.1	421.5	420.6	353.3	418.8	380.3	390.2	371.3	438.9	438.8	433.5
AT1G10200	2188.5	2368.6	2273	1348.1	1290.3	1307.4	2391.4	2659.7	2326	1476.7	1364.6	1502.9	2641	2597.7	2290	1864.6	1688.7	1547.4
AT1G10210	144.8	120.5	128.6	89.2	80.3	99.4	156.1	138.9	166.2	102.4	88.3	69.1	175.5	207.4	184.7	118	116.9	116.3
AT1G10220	13.1	16.4	12.1	2.1	0	0.9	9.7	15.8	12	0	1	3.1	23.3	30.2	13.1	8	3	3.3
AT1G10230	66.4	82.9	72.4	144.8	138.9	120	68.8	60.1	71.1	89.3	113.1	120.7	53.8	61.3	65.3	110	128.8	130.6
AT1G10240	131.8	126.2	128.6	143.7	152.7	148.2	110.5	115.3	119.2	125.5	148.9	151.6	111.6	127.2	127.8	146	119.8	124
AT1G10260	0	1	0	0	0	0	0	0	0	0	0	0	0	0	0.9	0	0	0
AT1G10270	230.3	329.6	311.5	491	422.5	415.5	246.2	275.8	292.4	339.3	406.9	364.1	198.8	248.8	252.8	320.9	337.7	383
AT1G10280	95.5	74.2	82.4	38.8	43.6	44.1	75.6	84.7	110.1	48.2	49.6	48.5	73	73.5	87.7	42	51.5	48.3
AT1G10290	1986.3	1953.2	2187.6	2327.9	2370.4	2400.9	2083.2	1954.4	2049.6	2236.6	2410.6	2484.8	1791.1	1938.9	1819.9	2188.5	2343.4	2337.5
AT1G10300	5	5.8	0	34.6	25.8	34.7	6.8	3.9	4	22.1	26.8	32	5.1	7.5	4.7	30	26.7	20.9
AT1G10310	118.7	104.1	114.6	250.7	248	228.8	106.6	139.9	110.1	226.9	234.2	253.7	121.7	141.4	127.8	272.9	272.4	244.7
AT1G10320	339.9	354.6	448.2	260.2	250.9	246.7	375.1	388.1	393.5	272	254.1	261	358	423.2	421.6	293.9	252.6	298.5
AT1G10330	30.2	33.7	36.2	21	16.9	26.3	14.5	22.7	21	31.1	18.9	19.6	28.4	20.7	26.1	14	21.8	17.6
AT1G10340	161.9	155.1	166.8	74.5	78.4	80.7	177.4	100.5	136.2	113.4	90.3	83.6	185.6	171.5	224.8	110	118.9	103.2
AT1G10350	367.1	354.6	405	282.2	237	271	371.3	368.4	408.5	287.1	240.2	275.4	441.2	400.6	436.6	280.9	271.4	298.5
AT1G10360	168	119.5	122.6	249.7	222.2	228.8	121.2	158.6	127.2	246.9	216.3	228	147.1	165.9	120.3	279.9	298.1	235.9
AT1G10370	202.2	429.8	300.5	199.3	278.7	236.3	183.2	467.9	342.4	240.9	366.2	168.1	241.4	368.5	320.9	189	228.8	253.5
AT1G10380	411.3	464.5	426.1	197.2	151.7	219.5	480.8	383.2	415.5	224.9	185.6	191.9	349.9	343.1	369.4	210	224.8	194.2
AT1G10385	1	0	2	2.1	2	2.8	1	0	1	2	1	0	2	0.9	4.7	2	1	3.3
AT1G10390	2360.4	2430.2	2499.1	2515.7	2665	2511.6	2355.6	2377	2345	2298.8	2562.4	2328.1	2363.1	2306.5	2350.7	2232.5	2453.4	2312.2
AT1G10400	67.4	55.9	31.2	32.5	15.9	26.3	37.8	34.5	41.1	36.1	21.8	37.1	51.7	31.1	42.9	30	20.8	30.7
AT1G10410	1699.7	1603.5	1714.3	899.1	869.8	784	1411.4	1849	1641.1	933.6	1010.3	891.2	1564.9	1612.7	1459.8	831.8	847.8	895.5
AT1G10417	46.3	34.7	48.2	15.7	13.9	14.1	65.9	34.5	51.1	18.1	18.9	19.6	54.8	63.2	39.2	15	21.8	13.2
AT1G10430	768.4	684.2	707.4	638.9	565.3	609.6	760	697.4	674.9	578.2	529	633.3	678.5	675.8	648.3	597.9	646.8	612.4
AT1G10450	637.6	635	806.9	674.6	736.9	669.6	604.9	649.2	635.8	667.6	786	724.1	589.3	695.6	673.5	684.8	694.3	695.8
AT1G10455	1	6.7	13.1	1	0	0	9.7	3	2	2	0	0	1	0.9	0	1	0	2.2
AT1G10460	205.2	244.8	329.6	100.7	106.1	96.6	176.4	216.7	220.3	93.4	69.5	127.9	129.8	161.2	138.1	101	92.1	105.4
AT1G10470	2029.6	2372.4	2366.4	385	450.3	460.5	1838.9	2301.1	2245.9	715.7	781	780.8	2265.8	2320.6	2195.8	1220.7	1095.5	1104
AT1G10480	214.2	309.3	328.6	33.6	32.7	18.8	219.1	425.5	364.5	69.3	77.4	57.8	414.8	552.3	436.6	183	163.4	150.3
AT1G10490	256.5	288.1	351.7	450.1	530.6	453	285	332	316.4	332.3	484.3	526.1	323.5	293.1	313.4	410.9	452.6	462
AT1G10500	238.4	257.3	250.2	531.9	567.3	510.2	227.8	245.3	247.3	578.2	554.8	501.3	275.9	236.6	272.4	540.9	576.5	614.6
AT1G10510	439.5	456.8	501.4	660.9	618.9	595.5	394.5	501.4	485.6	645.5	660.9	543.6	490.9	525	473.9	657.8	644.8	603.6
AT1G10520	34.2	33.7	45.2	52.5	53.6	38.5	31	33.5	37	36.1	53.6	38.2	39.6	50.9	40.1	49	55.5	34
AT1G10522	134.8	138.8	148.7	144.8	160.7	130.4	118.3	172.4	141.2	118.5	127	98	124.7	128.2	151.1	171	122.8	103.2
AT1G10530	11.1	15.4	16.1	8.4	9.9	16.9	25.2	15.8	20	9	11.9	13.4	17.2	21.7	24.3	18	16.8	15.4
AT1G10540	11.1	13.5	10	15.7	7.9	2.8	5.8	8.9	8	10	5	3.1	9.1	11.3	12.1	7	4	2.2
AT1G10550	545.1	801.7	753.6	229.7	188.4	171.6	589.4	819.6	691.9	162.6	132	141.3	614.6	715.4	731.3	123	230.8	210.7
AT1G10560	291.7	252.5	253.2	30.4	41.7	53.5	280.1	262	249.3	40.2	29.8	55.7	292.1	280.9	236.9	30	45.6	32.9
AT1G10570	442.5	432.7	557.7	349.3	364	373.3	386.8	480.7	507.7	369.4	390	395.1	481.8	488.2	514	379.9	329.8	384.1
AT1G10580	809.6	832.6	833	885.4	1003.7	919.1	761.9	860.9	892.1	1023.9	1034.1	867.5	811.4	874.7	809.7	890.8	865.7	982.2
AT1G10585	1	1.9	0	10.5	29.8	21.6	1	0	4	23.1	59.5	7.2	1	0.9	2.8	11	26.7	32.9
AT1G10586	0	0	0	0	0	0.9	0	0	0	1	0	0	0	0	0	0	0	0
AT1G10590	1458.3	1537	1532.4	1270.4	1244.7	1383.3	1519	1431.3	1536	1322.1	1374.5	1392.5	1514.2	1547.7	1489.7	1255.7	1280.7	1388.2
AT1G10600	148.8	124.3	127.6	155.3	155.7	155.7	185.1	147.8	165.2	182.7	201.5	139.3	194.7	154.6	167.9	207	151.5	149.2
AT1G10610	156.9	140.7	173.8	62.9	59.5	67.5	153.2	156.6	173.2	78.3	71.5	59.8	169.4	166.8	178.2	63	54.5	51.6
AT1G10620	0	0	0	0	0	0.9	1.9	0	0	0	0	0	0	0	0	0	0	1.1
AT1G10630	1413	1350	1279.2	1432	1480.8	1434	1458.9	1414.6	1380.8	1324.1	1400.3	1461.6	1308.3	1392.2	1271.4	1350.7	1493.6	1514.4
AT1G10640	62.4	31.8	38.2	15.7	20.8	19.7	64.9	66	25	18.1	8.9	12.4	44.6	26.4	36.4	9	21.8	25.2
AT1G10650	1090.2	1039.7	1273.2	555	579.2	634	1127.4	1131.8	1075.4	554.1	647	587.9	1203.9	984	1107.2	556.9	598.2	550.9
AT1G10652	0	0	1	0	0	0	0	0	0	0	0	0	0	0	0	1	0	0
AT1G10657	4	2.9	2	59.8	70.4	65.6	4.8	4.9	5	61.2	66.5	84.6	3	2.8	2.8	84	82.2	61.5
AT1G10660	964.5	970.4	1065.2	462.6	452.3	401.4	982.9	970.3	1004.3	592.3	482.3	462.1	1094.3	1023.6	994.4	531.9	537.8	522.4
AT1G10670	4012.8	4263	4031.5	3051.8	3345.3	3379.1	4267.1	4202.3	4095.3	3007.5	3016.9	3253.3	4392.6	4063.4	4031.6	3041.3	3265.6	3326.3
AT1G10680	1	1	0	14.7	10.9	15	0	0	0	6	10.9	11.3	0	0.9	0	10	7.9	6.6
AT1G10682	3640.7	3661.7	3487.9	295.8	239	246.7	3979.2	3412.3	3434.4	447.7	259	315.6	4004.1	3778.7	3618.4	579.9	329.8	362.1
AT1G10690	26.1	16.4	22.1	13.6	13.9	12.2	22.3	32.5	22	14.1	18.9	15.5	27.4	24.5	26.1	14	16.8	23
AT1G10700	520	553.1	587.8	613.7	566.3	560.8	528.3	451.2	521.7	727.8	664.9	532.2	478.7	485.4	541	668.8	691.3	655.2
AT1G10710	1	1.9	1	3.1	3	3.8	1	5.9	0	4	8.9	6.2	0	0.9	0	0	1	5.5
AT1G10720	978.6	998.3	1161.6	643.1	592.1	619.9	1025.6	1066.8	1006.3	685.6	608.3	575.6	1150.1	1100.9	1097.9	604.9	635.9	645.3
AT1G10730	311.8	318	322.6	130.1	123	164.1	322.8	281.7	266.3	180.7	145.9	173.3	254.6	289.4	324.6	157	174.3	143.8
AT1G10740	1464.3	1505.2	1473.1	1058.5	1367.7	1534.3	1391	1269.8	1231.6	916.5	904.1	939.7	1249.5	1245.1	1077.4	879.8	1332.2	1197.3
AT1G10747	0	0	0	0	0	0	0	1	2	0	0	0	0	0	0	2	0	1.1
AT1G10750	119.7	199.5	189.9	178.3	204.3	195.1	141.5	157.6	149.2	143.6	124.1	145.4	109.5	137.6	139	119	96.1	97.7
AT1G10760	1499.5	1269.1	1331.4	4141.8	3480.2	2670.1	1193.3	1789.9	1488.9	4318.6	4149.2	3420.4	1404.7	1617.4	1518.6	4830.9	4446.2	3001.4
AT1G10770	1	1	1	34.6	26.8	26.3	1.9	0	2	62.2	43.7	20.6	2	4.7	2.8	50	37.6	34
AT1G10780	67.4	88.7	71.3	103.9	78.4	86.3	65.9	76.8	92.1	60.2	76.4	98	88.2	86.7	94.2	72	83.2	88.9
AT1G10790	18.1	22.2	25.1	34.6	30.7	24.4	17.4	21.7	14	26.1	10.9	27.9	23.3	22.6	19.6	21	20.8	29.6
AT1G10800	28.2	23.1	34.2	25.2	25.8	20.6	28.1	28.6	27	23.1	19.8	38.2	41.6	35.8	30.8	19	17.8	30.7
AT1G10810	43.2	40.5	36.2	86	53.6	81.6	36.8	30.5	39.1	72.3	57.6	74.3	32.5	36.8	47.6	82	83.2	74.6
AT1G10820	352	404.7	402.9	265.4	218.2	240.1	332.5	419.6	364.5	228.9	217.3	252.7	381.3	388.3	373.1	255.9	238.7	204.1
AT1G10830	191.1	196.6	159.8	308.4	306.5	310.4	166.7	182.2	216.3	373.4	322.5	303.3	178.5	213	176.3	373.9	339.7	343.5
AT1G10840	1860.6	1907	1797.7	1719.4	1793.2	1751	1802	1731.7	1748.3	1706.5	1799.2	1730.8	1691.7	1832.3	1801.3	1662.6	1674.9	1673.6
AT1G10850	514.9	514.6	412	236	212.2	221.3	533.1	574.3	537.7	268	190.5	257.9	586.2	523.1	542.9	260.9	214.9	171.2
AT1G10865	451.6	478	620	257	304.5	270.1	453.7	502.4	538.7	321.2	372.2	279.5	510.1	537.3	569.9	294.9	286.2	343.5
AT1G10870	697	606.1	671.2	551.8	523.7	531.8	697	632.4	662.9	511	474.4	554.9	623.7	678.6	583	523.9	520	429.1
AT1G10880	0	1	0	0	0	0	0	1	0	2	0	0	0	0	0	0	0	0
AT1G10890	1187.8	1151.5	1514.3	798.4	882.7	859.1	1183.6	1226.4	1186.5	848.3	954.7	809.7	1248.5	1185.7	1158.5	824.8	777.5	798.9
AT1G10900	1288.3	1070.6	1166.6	912.7	953.1	943.5	1191.3	1105.2	905.2	882.4	824.7	824.2	738.3	727.7	682.8	715.8	725	749.5
AT1G10910	332.9	332.4	295.4	309.5	323.3	290.7	401.3	328	313.4	309.2	321.5	274.4	321.5	353.5	296.6	305.9	287.2	278.7
AT1G10920	53.3	51.1	77.4	193	163.6	170.7	64	45.3	46.1	230.9	175.7	127.9	73	62.2	71.8	165	187.2	153.6
AT1G10930	133.8	123.3	92.4	338.9	349.1	308.6	112.4	163.5	151.2	260	255	294	136.9	104.6	134.3	327.9	286.2	214
AT1G10940	2019.5	2017.8	2253.9	1267.3	1248.7	1265.2	2131.6	2130.7	1854.4	1309	1223.6	1154.2	2045.7	1991.6	1890.8	1221.7	1174.7	1135.8
AT1G10950	3234.4	3299.4	3082.9	3095.8	3224.3	3091.2	3355	3184.7	3346.3	3096.9	3023.9	3253.3	3314.4	3263.2	3127.7	2883.3	3111.1	3171.5
AT1G10960	1389.9	753.5	451.2	1933.5	2325.8	2301.5	1370.7	1105.2	1047.3	1935.4	1687.1	1705	1255.6	1162.2	942.1	2537.4	2103.7	1851.3
AT1G10970	182	190.8	158.8	238.1	257.9	296.4	180.3	136.9	195.3	422.6	333.4	296	185.6	206.4	167	297.9	296.1	417
AT1G10980	0	0	0	0	3	1.9	0	0	0	0	3	0	0	2.8	2.8	2	0	2.2
AT1G10990	44.3	54.9	37.2	182.5	178.5	200.7	47.5	23.6	43.1	230.9	273.9	225.9	55.8	37.7	41	151	158.5	225
AT1G11000	1293.4	1121.6	1367.6	448	469.1	485.8	1419.1	996.9	1006.3	288.1	394	325.9	855	721.1	760.2	208	216.9	205.2
AT1G11020	458.6	407.6	444.1	211.9	217.2	231.7	415.9	390.1	448.6	264	215.4	198	438.1	387.4	369.4	194	243.7	221.7
AT1G11040	0	0	1	0	0	1.9	1	1	0	0	2	0	0	0.9	1.9	3	1	0
AT1G11050	958.5	959.8	973.7	1262	1136.6	1151.7	1029.5	976.2	791	1386.3	1081.7	1338.9	1090.3	901.1	1047.5	1297.7	1260.9	1230.2
AT1G11060	359	343	356.7	358.8	304.5	339.5	357.7	361.5	356.5	302.2	314.6	318.7	352.9	413.8	360.1	317.9	337.7	306.2
AT1G11070	2	4.8	3	28.3	36.7	46.9	3.9	1	4	45.2	37.7	30.9	6.1	4.7	1.9	44	41.6	36.2
AT1G11080	4	5.8	4	111.2	76.4	66.6	1	4.9	4	59.2	61.5	56.7	6.1	4.7	13.1	91	76.3	52.7
AT1G11090	228.3	271.7	233.1	198.3	203.3	191.3	224.9	236.4	240.3	203.8	184.6	193.9	224.1	194.2	178.2	178	171.4	192
AT1G11100	109.6	117.6	144.7	54.6	62.5	60	88.2	102.4	114.1	34.1	102.2	79.4	106.5	118.8	123.1	57	62.4	66.9
AT1G11110	0	0	1	0	0	0	0	0	0	1	0	1	0	0	0	0	0	0
AT1G11112	6	1.9	2	11.5	6.9	4.7	1.9	2	3	0	3	5.2	2	0	2.8	2	2	4.4
AT1G11120	348	368.1	351.7	141.6	126	106.9	214.2	276.8	264.3	85.3	92.3	105.2	151.1	181	163.2	41	34.7	32.9
AT1G11125	81.5	80	89.4	85	77.4	69.4	66.9	58.1	53.1	48.2	37.7	74.3	26.4	17.9	17.7	37	46.6	58.2
AT1G11130	155.9	174.4	164.8	537.1	627.8	581.5	148.3	140.9	156.2	336.3	409.9	520.9	128.8	136.7	153	351.9	440.8	451
AT1G11150	83.5	83.8	68.3	42	35.7	36.6	77.5	77.8	91.1	54.2	34.7	42.3	75.1	84.8	79.3	46	62.4	41.7
AT1G11160	37.2	30.8	30.1	75.5	67.4	101.3	25.2	22.7	38	63.2	69.5	111.4	27.4	20.7	38.2	79	61.4	79
AT1G11170	115.7	104.1	121.6	60.8	32.7	34.7	140.6	114.3	88.1	29.1	23.8	45.4	99.4	103.7	87.7	49	41.6	37.3
AT1G11175	106.6	143.6	150.7	94.4	79.3	63.8	191	158.6	178.2	98.4	69.5	85.6	218.1	194.2	207.1	125	102	93.3
AT1G11180	199.1	228.4	263.3	198.3	194.4	239.2	193.9	201.9	220.3	366.4	317.6	263	227.2	196.1	192.2	317.9	234.7	287.5
AT1G11185	485.8	522.3	522.5	574.9	561.4	645.2	648.5	468.9	498.6	699.7	639.1	512.6	498	498.6	605.4	699.8	747.8	706.7
AT1G11190	214.2	206.2	212	163.7	133.9	141.6	171.6	206.9	182.2	148.6	110.2	176.4	201.8	188.5	193.1	111	152.5	176.7
AT1G11200	356	319.9	321.6	262.3	273.7	226	356.7	314.2	282.4	270	314.6	283.7	345.8	305.4	319	275.9	283.3	327
AT1G11210	1270.2	1130.3	1603.8	706	679.4	660.3	1459.9	1036.3	1197.5	795	790	771.6	1486.8	1164.1	1065.3	704.8	763.6	825.3
AT1G11220	44.3	38.5	57.3	26.2	46.6	32.8	43.6	44.3	30	35.1	32.7	53.6	37.5	33.9	40.1	43	40.6	54.9
AT1G11240	315.8	352.7	345.7	508.8	509.8	546.8	364.5	364.5	313.4	440.7	493.2	520.9	277.9	327.1	366.6	465.9	453.6	469.7
AT1G11250	4	2.9	2	0	0	0.9	1.9	5.9	3	0	2	0	3	7.5	1.9	1	0	1.1
AT1G11260	3445.6	3520.1	3857.7	3248	3112.3	2974.9	4217.7	3131.5	3933.1	4640.8	4505.5	2831.4	5001.1	4852.3	5213.5	4000.1	4550.2	4308.4
AT1G11265	1	1.9	0	4.2	1	4.7	0	2	0	11	1	3.1	1	0	0	3	3	0
AT1G11270	49.3	56.9	57.3	74.5	58.5	64.7	59.1	61.1	57.1	85.3	68.5	74.3	62.9	59.4	69	89	84.2	57.1
AT1G11280	424.4	602.3	544.6	622.1	691.3	635.9	457.5	590.1	573.7	498.9	616.3	543.6	431	482.6	463.6	492.9	502.2	507
AT1G11290	33.2	30.8	26.1	98.6	86.3	106.9	29.1	38.4	28	75.3	90.3	75.3	26.4	28.3	21.5	67	94.1	81.2
AT1G11300	142.8	96.4	89.4	68.2	85.3	80.7	107.6	122.1	154.2	61.2	69.5	84.6	147.1	114.1	104.5	67	83.2	76.8
AT1G11310	2163.3	2082.4	2305.2	2370.9	2287.1	2330.6	2967.2	2124.8	1956.5	2795.7	2598.1	2766.4	3757.7	2752.3	2791.9	2668.4	2741.6	2650.3
AT1G11320	50.3	68.4	76.4	97.6	81.3	85.3	52.3	66	57.1	95.4	98.2	73.2	63.9	56.6	85.8	80	90.1	102.1
AT1G11330	237.4	228.4	371.8	1000.8	1118.8	1109.5	297.6	260.1	281.4	1243.8	1244.5	1189.3	392.5	260.1	369.4	1155.7	1277.7	1343.2
AT1G11340	9.1	7.7	8	13.6	20.8	24.4	6.8	3.9	4	8	11.9	10.3	5.1	7.5	9.3	21	11.9	23
AT1G11350	404.3	394.1	494.4	528.7	636.7	602.1	463.4	436.4	414.5	690.6	612.3	645.7	527.4	498.6	497.2	552.9	591.3	723.2
AT1G11360	938.3	954	960.6	570.7	576.2	558	1067.3	920.1	1027.3	710.7	664.9	625.1	1073	934.1	919.7	713.8	725	683.7
AT1G11362	1	2.9	5	11.5	2	2.8	2.9	3.9	3	4	11.9	3.1	3	9.4	1.9	16	6.9	2.2
AT1G11370	0	0	0	1	0	0	1	1	0	0	0	0	0	0.9	0	0	0	0
AT1G11380	250.4	287.2	265.3	370.3	372.9	451.1	286.9	298.5	283.4	435.7	418.8	374.4	300.2	324.2	350.7	462.9	547.7	538.8
AT1G11390	501.9	582	664.2	547.6	486	502.7	429.4	514.2	604.8	469.8	611.3	491	463.5	486.4	500	395.9	409.1	436.8
AT1G11400	549.1	627.3	637.1	448	460.2	496.1	540.9	615.7	618.8	438.7	489.3	427	500	582.5	545.7	370.9	356.6	372
AT1G11410	492.8	459.6	576.8	166.8	107.1	122.9	390.7	560.5	396.5	122.5	97.3	91.8	388.4	338.4	289.2	110	116.9	64.7
AT1G11420	45.3	64.6	64.3	134.3	97.2	123.8	51.4	47.3	41.1	110.4	104.2	121.7	58.8	54.7	63.4	132	109.9	93.3
AT1G11430	388.2	367.1	301.5	810.9	894.6	851.6	339.3	402.9	395.5	852.3	822.7	738.5	348.9	387.4	319	906.8	873.6	927.3
AT1G11440	314.8	304.5	319.5	129	149.8	177.3	324.7	317.2	306.4	133.5	145.9	118.6	287	246	277	150	152.5	128.4
AT1G11450	75.4	77.1	66.3	1143.5	1240.7	1173.3	73.7	60.1	88.1	1225.7	1115.5	1238.8	125.8	118.8	102.6	1239.7	1280.7	1221.4
AT1G11460	2	1	1	73.4	91.2	55.3	1	0	2	100.4	96.3	89.7	2	1.9	0.9	74	83.2	42.8
AT1G11475	335.9	364.2	307.5	360.9	343.2	369.5	291.8	323.1	318.4	276.1	345.4	366.2	279.9	296	329.3	289.9	358.5	419.2
AT1G11480	1686.6	1600.6	1597.7	1533.8	1457.9	1494	1623.7	1569.2	1502.9	1657.4	1572	1527.6	1600.4	1604.2	1530.7	1465.7	1594.6	1551.7
AT1G11482	2	0	1	0	2	0	2.9	1	0	1	2	0	0	0	2.8	1	1	2.2
AT1G11490	4	3.9	2	4.2	4	2.8	5.8	2	4	5	6.9	4.1	9.1	2.8	3.7	6	5.9	2.2
AT1G11500	20.1	22.2	19.1	12.6	8.9	4.7	9.7	26.6	25	4	10.9	13.4	26.4	17.9	23.3	17	10.9	8.8
AT1G11510	1	0	0	0	0	0	0	0	0	0	0	0	0	0	0	0	0	1.1
AT1G11530	367.1	413.4	371.8	448	389.8	324.5	413.9	350.7	362.5	506.9	445.6	362.1	416.8	432.6	400.2	498.9	437.8	441.2
AT1G11540	37.2	28.9	22.1	18.9	10.9	16.9	50.4	18.7	26	14.1	6.9	25.8	27.4	31.1	35.4	23	13.9	21.9
AT1G11545	2649.1	2471.7	2133.3	781.6	694.3	589.9	2520.3	2677.4	2295	469.8	563.7	559.1	1928	1831.4	1676.3	398.9	414	470.8
AT1G11550	2	0	0	0	0	1.9	0	0	0	0	0	0	0	0	0	0	0	1.1
AT1G11560	2	1	4	5.2	3	3.8	2.9	2	2	1	2	1	3	5.7	2.8	3	3	4.4
AT1G11570	22.1	27	22.1	22	22.8	21.6	27.1	18.7	25	31.1	23.8	19.6	32.5	26.4	26.1	25	17.8	35.1
AT1G11572	2	0	0	0	0	0.9	0	0	0	7	1	1	0	1.9	3.7	3	0	0
AT1G11580	3394.3	3392.9	3804.4	9287.5	10001.3	9765.9	4012.2	3476.3	3950.1	13917.4	14809.7	10541.8	3837.8	3457.3	4190.2	10317.6	12200.6	13172.2
AT1G11590	0	0	1	1	1	0.9	0	0	0	0	0	0	0	1.9	0.9	0	1	1.1
AT1G11592	250.4	252.5	238.2	117.5	105.1	91	229.7	252.2	219.3	112.4	132	133.1	255.6	239.4	203.4	137	104	124
AT1G11600	161.9	213.9	85.4	59.8	97.2	61.9	149.3	211.8	214.3	59.2	52.6	18.6	184.6	177.2	172.6	72	57.4	47.2
AT1G11610	0	0	0	0	0	4.7	0	0	0	0	0	0	0	0	0	0	0	0
AT1G11620	0	0	0	0	0	0	0	0	0	1	0	0	0	2.8	0	0	0	0
AT1G11630	136.8	165.7	148.7	190.9	189.4	204.5	142.5	152.7	185.2	190.7	224.3	192.9	134.9	129.1	133.4	178	182.2	214
AT1G11650	5433.9	5419.4	5314.7	5058.7	5073.1	5145.1	5286.9	4960.8	5500.1	5682.8	5752	5164.7	5609.6	5496.1	5297.4	5255.8	5390.1	5494.7
AT1G11655	4	1.9	2	2.1	4	4.7	0	2	2	1	4	5.2	2	0.9	2.8	2	0	0
AT1G11660	854.9	889.4	859.2	996.6	996.8	924.7	738.7	881.6	819.1	881.4	1013.2	985.1	721.1	811.5	708	912.8	1012.3	927.3
AT1G11670	1900.8	1848.2	2384.5	2423.4	2268.2	2318.4	2221.8	1648	1854.4	2581.9	2953.4	2929.4	2018.3	1517.5	2196.8	2246.5	2372.2	2380.3
AT1G11680	1822.4	1686.3	1544.5	1438.3	1374.6	1321.4	1813.7	1672.6	1639.1	1516.8	1425.1	1577.1	1859.1	1657	1671.6	1502.7	1422.3	1314.7
AT1G11690	0	0	0	0	0	0.9	0	0	0	0	0	0	1	0	0	1	0	0
AT1G11700	83.5	75.2	84.4	87.1	57.5	94.7	101.8	117.2	82.1	107.4	77.4	94.9	162.3	123.5	144.6	148	103	126.2
AT1G11710	75.4	80	80.4	85	80.3	84.4	63	75.9	57.1	69.3	71.5	74.3	62.9	65	57.8	48	66.4	72.4
AT1G11720	218.2	162.9	116.6	510.9	515.7	613.4	185.1	187.2	160.2	429.6	496.2	429.1	143	173.4	153	535.9	539.8	411.5
AT1G11730	46.3	34.7	35.2	52.5	69.4	61	26.2	24.6	19	37.1	47.6	53.6	29.4	26.4	15.9	53	48.5	50.5
AT1G11735	149.9	127.2	169.8	24.1	23.8	16.9	71.7	124.1	133.2	6	4	16.5	31.4	39.6	35.4	6	7.9	4.4
AT1G11740	316.8	276.6	254.2	35.7	18.8	35.6	341.2	274.8	203.3	27.1	17.9	20.6	172.4	184.7	139.9	23	11.9	24.1
AT1G11750	471.7	390.3	420	1032.3	1093	1022.3	469.2	497.5	524.7	1071.1	1046	953.1	522.3	563.7	498.1	1110.7	975.6	1059
AT1G11755	114.7	137.8	138.7	118.5	92.2	101.3	119.2	134	135.2	127.5	88.3	124.8	117.6	121.6	143.7	124	137.7	119.6
AT1G11760	99.6	104.1	105.5	90.2	80.3	88.2	97.9	111.3	131.2	96.4	112.1	88.7	121.7	103.7	120.3	93	96.1	94.4
AT1G11770	0	0	0	0	0	0	0	0	0	2	0	0	0	0	0	0	0	0
AT1G11780	221.3	233.2	215	274.9	283.7	288.9	218.1	225.6	201.3	264	263	296	175.5	188.5	209.9	270.9	290.2	302.9
AT1G11785	3	2.9	5	5.2	3	2.8	1.9	7.9	5	4	8.9	0	6.1	1.9	6.5	3	5	0
AT1G11790	191.1	237	204	346.2	396.7	384.5	178.4	198	186.2	284.1	330.5	340.4	200.8	203.6	181	290.9	346.7	268.9
AT1G11800	140.8	150.3	141.7	116.4	109.1	96.6	125	166.5	147.2	102.4	114.1	114.5	166.3	146.1	150.2	122	119.8	129.5
AT1G11810	0	1	1	0	1	0	0	0	2	0	1	0	2	0	1.9	0	0	0
AT1G11820	596.4	538.7	550.7	613.7	671.4	597.4	568	587.1	619.8	584.2	622.2	589	534.5	582.5	552.2	570.9	562.6	593.7
AT1G11840	5422.9	6691.3	6211.1	13983.2	15279.7	14759	5368.3	6102.5	5765.4	14243.6	13098.8	15791	5876.4	6068.2	5804.9	12944	16246.6	17535.6
AT1G11850	23.1	12.5	19.1	22	15.9	10.3	24.2	29.6	19	10	11.9	4.1	20.3	23.6	14.9	33	8.9	0
AT1G11860	2780.8	2127.7	1507.3	6497	6626.2	6592.2	2705.5	2372	2482.2	6265	5905.8	5598.9	2605.5	2610	2324.6	7346.3	6657.9	6009.4
AT1G11870	241.4	192.7	206	347.2	364	329.2	223.9	199	221.3	348.3	395	289.8	211	247	229.5	391.9	314	328.1
AT1G11880	131.8	112.7	121.6	79.7	82.3	107.9	127	110.3	150.2	88.3	92.3	98	119.7	130.1	143.7	106	119.8	75.7
AT1G11890	775.4	806.5	845.1	975.6	970	1013.8	755.1	813.7	815	942.6	1018.2	936.6	764.7	744.6	761.2	830.8	1031.1	1072.2
AT1G11900	20.1	27	31.2	22	24.8	24.4	34.9	41.4	35	46.2	34.7	25.8	41.6	50	32.6	37	44.6	20.9
AT1G11905	309.8	378.7	336.6	258.1	276.7	238.2	308.3	283.7	371.5	264	296.7	250.7	285	304.4	325.5	242.9	265.4	263.4
AT1G11910	12014.4	11354.3	10964	5358.7	4911.4	4815.9	11786.5	11080	10843	6245.9	4841	5428.7	12324.7	11934.8	11698.3	5931.6	5561.5	5599
AT1G11915	53.3	68.4	58.3	38.8	23.8	29.1	63	64	45.1	32.1	25.8	37.1	46.7	62.2	53.2	33	32.7	40.6
AT1G11920	1	1.9	1	4.2	0	2.8	3.9	2	0	4	5	4.1	2	0.9	2.8	7	5	6.6
AT1G11925	3	8.7	3	28.3	32.7	37.5	1.9	3.9	9	32.1	69.5	42.3	9.1	1.9	3.7	36	54.5	51.6
AT1G11930	905.2	858.6	896.3	756.4	640.7	586.2	875.3	932.9	864.1	736.8	690.7	611.7	899.6	877.5	850.7	723.8	711.2	695.8
AT1G11940	94.5	131.1	96.5	131.1	142.8	151	83.4	102.4	88.1	120.5	177.6	175.4	92.3	105.6	80.2	121	162.4	171.2
AT1G11950	172	152.3	207	158.4	147.8	149.1	191	141.8	177.2	167.6	162.8	157.8	152.1	163.1	190.3	185	149.6	158
AT1G11960	2188.5	2245.2	3048.8	1566.3	2063.9	2135.5	2074.4	2077.5	2471.2	1735.7	2313.3	1768	2096.4	2167	2250.9	1480.7	2183	1921.6
AT1G11990	0	1	2	1	1	0	1	0	0	1	1	5.2	0	0	0	0	2	3.3
AT1G12000	1859.6	1689.2	1489.2	2267.1	2312.9	2319.3	1842.8	1652.9	1735.2	1865.2	1912.4	2427.1	1741.4	1729.6	1684.7	1819.6	2249.3	2351.8
AT1G12010	378.2	425	281.4	86	55.5	66.6	416.8	348.7	344.4	60.2	93.3	114.5	343.8	385.5	430	100	80.2	76.8
AT1G12013	0	1.9	0	1	2	1.9	1	0	1	0	3	3.1	0	0	0	0	1	3.3
AT1G12020	86.5	87.7	73.4	125.9	130.9	123.8	76.6	69	86.1	96.4	99.2	92.8	85.2	118.8	97	123	81.2	103.2
AT1G12030	6	2.9	2	4.2	4	12.2	1.9	3	4	5	10.9	11.3	1	2.8	1.9	8	5.9	0
AT1G12040	95.5	103.1	76.4	201.4	147.8	193.2	110.5	54.2	69.1	190.7	228.3	311.5	95.3	63.2	117.5	212	172.3	173.4
AT1G12050	527	503	443.1	600.1	672.4	577.7	564.2	558.5	507.7	626.4	578.6	682.8	548.7	533.5	516.8	722.8	703.2	635.4
AT1G12060	78.4	80.9	78.4	104.9	99.2	136.9	45.6	86.7	86.1	81.3	68.5	113.5	76.1	66	61.6	110	104	103.2
AT1G12064	6	8.7	2	2.1	3	5.6	8.7	5.9	5	13.1	1	1	11.2	4.7	5.6	3	8.9	4.4
AT1G12070	64.4	67.5	52.3	29.4	19.8	33.8	54.3	58.1	48.1	17.1	9.9	16.5	47.7	41.5	28	9	11.9	11
AT1G12080	19152	17023.2	17043.5	938.9	977.9	989.4	21974.5	18527.2	16204.9	571.2	659	704.5	18858.3	15799.3	14224.4	440.9	396.2	429.1
AT1G12090	21908.7	23709.7	23704.7	3025.5	3146	2643.8	23447.9	23211.2	23482.2	4641.8	2984.2	4073.3	26982.1	24713.1	24003	5818.7	3976.7	4942.7
AT1G12100	0	2.9	0	6.3	5	4.7	0	1	0	1	6.9	3.1	8.1	0	0	2	0	3.3
AT1G12110	8518.5	8457.6	7008.9	2343.6	2482.5	2146.8	7354.6	7260.9	7338.5	2513.6	2020.5	3116.1	8418	8238	8140.6	2905.3	3263.6	4397.3
AT1G12120	779.4	833.5	832	1025	925.4	914.4	806.5	905.3	832.1	1049	913	1001.6	889.5	870.9	844.2	1073.8	1049.9	975.6
AT1G12130	1	12.5	2	3.1	0	1.9	11.6	4.9	4	8	3	6.2	5.1	18.9	7.5	1	8.9	6.6
AT1G12140	786.5	945.3	1033	1200.1	1292.3	1308.3	929.6	904.3	991.3	1198.6	1195.8	1368.8	934.1	902	919.7	1381.7	1396.6	1343.2
AT1G12150	15.1	4.8	13.1	4.2	4	9.4	7.8	12.8	6	15.1	11.9	8.3	3	11.3	10.3	8	3	5.5
AT1G12160	160.9	144.5	108.5	98.6	79.3	114.4	186.1	113.3	92.1	94.4	93.3	93.9	124.7	112.2	170.7	81	93.1	71.3
AT1G12180	0	0	0	1	1	0	0	0	0	0	0	0	0	0	0.9	0	0	1.1
AT1G12200	327.9	379.7	383.9	1538	1461.9	1374	414.9	468.9	375.5	2577.9	2040.4	2082.6	645	629.6	615.7	2488.4	3019.9	3396.5
AT1G12210	34.2	60.7	43.2	72.4	72.4	79.7	36.8	52.2	44.1	81.3	87.3	82.5	45.6	54.7	53.2	76	91.1	71.3
AT1G12211	0	0	2	0	0	0	3.9	0	1	0	1	0	0	0.9	0	0	0	0
AT1G12220	95.5	97.3	110.5	246.5	267.8	218.5	97.9	104.4	98.1	230.9	177.6	221.8	107.5	81.1	111	249.9	177.3	178.9
AT1G12230	1238	999.3	846.1	1664.9	1555.1	1429.3	1278.6	1092.4	1133.5	1809.9	1614.6	1622.5	1181.6	1139.6	1048.5	1756.6	1562	1484.8
AT1G12240	1615.2	1851.1	2495.1	3624.6	5616.6	6116.7	2133.6	2071.6	2442.1	5813.3	6972.6	4681.9	2359.1	2182	2737.8	4531	7389.9	8113.2
AT1G12244	44.3	53	54.3	53.5	59.5	68.5	61.1	45.3	36	51.2	65.5	56.7	35.5	51.8	54.1	66	75.3	50.5
AT1G12250	60.3	54.9	33.2	518.2	457.2	465.2	67.9	64	100.1	528	493.2	403.3	61.9	72.6	54.1	595.9	487.3	490.5
AT1G12260	171	144.5	156.8	193	183.5	186.6	169.6	162.5	158.2	180.7	143.9	212.5	189.7	147	154.8	205	223.8	190.9
AT1G12270	889.1	888.5	1000.8	1147.7	1064.2	1034.5	871.5	885.6	931.2	977.7	1120.4	1132.6	901.6	882.2	960.8	1037.8	1018.2	1048
AT1G12280	79.5	64.6	97.5	135.3	169.6	155.7	58.2	69.9	79.1	181.7	161.8	207.3	44.6	53.7	73.7	183	181.3	174.5
AT1G12290	99.6	127.2	110.5	87.1	139.8	89.1	96.9	102.4	119.2	104.4	106.2	95.9	108.5	97.1	84.9	88	112.9	119.6
AT1G12300	51.3	37.6	29.1	52.5	44.6	46.9	63	43.3	30	47.2	49.6	41.3	40.6	43.4	43.8	38	43.6	47.2
AT1G12310	2072.8	2007.2	1937.4	1282	1297.3	1311.1	2233.4	1993.8	2076.7	1414.4	1330.8	1504.9	2237.4	2054.8	1999.9	1436.7	1440.1	1719.6
AT1G12320	83.5	63.6	54.3	76.6	112.1	103.2	83.4	77.8	62.1	99.4	127	98	130.8	125.4	105.4	85	163.4	203
AT1G12330	226.3	212	188.9	67.1	75.4	67.5	202.6	266	255.3	77.3	85.3	71.2	230.2	244.1	185.6	106	91.1	97.7
AT1G12350	341.9	329.6	364.8	171	182.5	161.3	308.3	313.3	343.4	221.9	164.7	166.1	375.3	340.3	283.6	228.9	163.4	166.8
AT1G12360	1947.1	1749.9	2021.8	1470.8	1555.1	1594.4	1927.1	1875.6	1844.4	1523.8	1703	1491.5	1901.7	1867.2	1939.3	1380.7	1588.7	1594.5
AT1G12370	37.2	23.1	24.1	117.5	125	176.3	17.4	34.5	40.1	107.4	103.2	155.8	25.4	33.9	42.9	130	145.6	139.4
AT1G12380	85.5	92.5	71.3	225.6	261.8	245.7	84.3	75.9	95.1	201.8	176.6	220.7	113.6	89.5	97	207	263.5	283.1
AT1G12390	278.6	217.8	246.2	193	185.5	187.6	253	310.3	233.3	188.7	193.5	181.5	280.9	250.7	280.8	221.9	191.2	217.3
AT1G12400	229.3	238	200	156.3	153.7	161.3	243.3	215.7	231.3	139.5	142.9	166.1	192.7	208.3	177.2	147	135.7	177.8
AT1G12410	771.4	712.1	660.2	1349.1	1386.5	1368.3	824.9	884.6	809	1356.2	1396.3	1285.2	834.7	846.4	783.6	1475.7	1404.5	1471.6
AT1G12420	262.5	244.8	248.2	89.2	107.1	83.5	225.9	291.6	259.3	93.4	110.2	77.4	268.8	325.2	332.1	82	84.2	84.5
AT1G12430	448.6	447.1	532.6	731.2	800.4	810.3	498.3	426.5	441.6	648.5	552.8	777.7	562.9	558.9	603.5	784.8	846.8	752.8
AT1G12440	1699.7	1678.6	1783.6	1184.4	1160.4	1128.2	1779.8	1657.9	1699.2	1353.2	1324.9	1096.5	1927	1874.8	1827.4	1364.7	1374.8	1353.1
AT1G12450	185.1	200.4	182.9	225.6	226.1	240.1	199.7	197	237.3	228.9	249.1	217.6	214	231.9	230.4	246.9	281.3	291.9
AT1G12460	197.1	178.3	139.7	101.8	104.1	70.3	164.8	177.3	161.2	95.4	65.5	78.4	117.6	142.3	127.8	95	67.4	61.5
AT1G12470	978.6	1005.1	1100.3	1196	1196.1	1203.3	1095.4	1029.4	925.2	1154.4	1248.4	1196.5	1039.6	980.3	982.2	1077.8	1174.7	1163.3
AT1G12480	7	6.7	4	15.7	14.9	18.8	3.9	6.9	7	18.1	23.8	12.4	5.1	4.7	1.9	12	14.9	12.1
AT1G12490	0	1.9	0	1	0	2.8	1	1	1	4	0	2.1	2	5.7	1.9	2	0	0
AT1G12500	980.6	961.7	970.7	1412.1	1364.7	1287.7	1012	1115.1	1034.3	1356.2	1286.2	1336.8	1090.3	1050	1021.4	1333.7	1505.5	1578.1
AT1G12520	871	852.8	832	293.7	312.4	302.9	869.5	749.6	804	441.7	320.5	296	871.2	835.1	874	320.9	315	353.4
AT1G12530	194.1	193.7	144.7	194.1	186.5	147.2	178.4	198	181.2	182.7	165.7	224.9	209.9	199.8	196.8	216	182.2	197.5
AT1G12540	0	0	0	0	1	0.9	0	0	0	2	1	2.1	0	0	0.9	2	4	1.1
AT1G12550	51.3	48.2	51.2	89.2	104.1	95.7	41.7	47.3	62.1	100.4	75.4	102.1	49.7	50	52.2	91	109.9	122.9
AT1G12560	52.3	43.4	49.2	120.6	110.1	107.9	58.2	28.6	43.1	105.4	136	156.8	59.8	47.1	78.4	87	76.3	75.7
AT1G12570	3	4.8	3	13.6	10.9	6.6	1	3.9	2	0	4	2.1	0	1.9	0	3	2	1.1
AT1G12580	2349.4	2311.7	2321.2	1782.4	1774.3	1859.8	2018.2	1835.2	1815.3	1562	1467.8	1471.9	1411.8	1328.1	1303.1	1345.7	1297.5	1232.4
AT1G12600	27.2	25.1	24.1	13.6	8.9	19.7	24.2	29.6	24	13.1	8.9	9.3	22.3	18.9	31.7	10	13.9	11
AT1G12610	954.4	1003.1	1152.6	2037.3	1851.7	2215.2	1018.8	751.6	1034.3	1819	1653.3	1662.8	913.8	740.9	1144.6	2086.5	1801.7	1648.3
AT1G12620	90.5	94.4	94.5	113.3	119	103.2	87.2	91.6	120.2	105.4	122.1	91.8	77.1	101.8	91.4	108	133.7	96.6
AT1G12630	0	1	7	11.5	15.9	17.8	1	2	1	20.1	12.9	19.6	2	1.9	0.9	19	13.9	9.9
AT1G12640	922.3	848.9	837	606.4	556.4	623.7	846.3	822.5	856.1	652.5	590.5	625.1	854	822.9	744.4	597.9	564.6	586
AT1G12650	369.1	371	381.8	427	429.4	423.9	330.6	379.3	379.5	334.3	436.7	411.6	293.1	316.7	329.3	358.9	355.6	354.5
AT1G12663	0	0	0	0	0	0	2.9	0	0	0	0	0	0	0	0	0	0	2.2
AT1G12665	1	0	3	0	0	0	0	0	1	0	0	0	5.1	0.9	1.9	0	0	0
AT1G12669	3	2.9	1	0	1	0	2.9	3	0	0	1	0	2	2.8	2.8	0	0	0
AT1G12670	6	5.8	5	0	0	0	9.7	7.9	1	1	1	1	3	3.8	1.9	3	0	0
AT1G12672	3	8.7	3	0	3	0	4.8	3.9	1	0	2	1	11.2	1.9	2.8	1	3	1.1
AT1G12680	401.3	376.8	378.8	274.9	299.5	265.4	380	385.2	376.5	347.3	280.9	251.7	418.9	434.5	426.3	306.9	300.1	283.1
AT1G12700	47.3	43.4	40.2	46.2	42.6	34.7	39.7	41.4	41.1	35.1	31.8	30.9	55.8	46.2	44.8	37	27.7	18.7
AT1G12710	127.7	172.5	187.9	150	146.8	121.9	162.9	187.2	191.2	186.7	152.8	141.3	203.9	218.7	206.2	195	193.1	158
AT1G12730	73.4	72.3	106.5	96.5	75.4	82.5	77.5	85.7	63.1	101.4	73.4	84.6	111.6	109.3	100.7	110	88.2	74.6
AT1G12740	210.2	184.1	181.9	129	95.2	125.7	257.9	173.4	248.3	92.4	142.9	132	270.8	266.7	267.7	93	65.4	72.4
AT1G12750	346	372.9	340.6	225.6	254.9	212.9	333.5	365.5	343.4	223.9	221.3	216.6	359	317.6	310.6	241.9	205	199.7
AT1G12760	2055.7	2032.3	2230.8	1291.4	1299.3	1273.6	2146.2	1876.6	1848.4	1396.4	1468.8	1216.1	2114.6	1860.6	1938.4	1269.7	1304.4	1310.3
AT1G12770	253.4	260.2	188.9	552.9	617.9	493.3	221	263	261.3	520	517	480.7	228.2	260.1	251.9	592.9	559.6	541
AT1G12775	31.2	40.5	41.2	32.5	30.7	31.9	26.2	29.6	28	42.2	18.9	26.8	38.5	32	42	26	16.8	24.1
AT1G12780	3956.5	3669.4	3571.3	2723.4	2438.8	2364.3	4489.1	3653.6	3661.7	3892.9	3899.2	2816	4597.4	4206.7	3885.1	3835.1	3279.4	3282.4
AT1G12790	96.5	101.2	109.5	106	102.2	101.3	124.1	126.1	120.2	118.5	142.9	120.7	133.9	121.6	130.6	134	94.1	129.5
AT1G12800	525	434.6	285.4	1684.8	1901.3	1847.6	388.7	524.1	529.7	1887.2	1667.2	1512.2	481.8	576.8	491.6	1898.6	1685.8	1560.5
AT1G12805	3	4.8	1	13.6	5	7.5	1.9	1	1	5	44.7	8.3	10.1	8.5	2.8	26	6.9	15.4
AT1G12810	818.7	832.6	907.4	363	362	337.6	849.2	856	939.2	451.7	442.6	369.3	931	903.9	941.2	444.9	395.2	505.9
AT1G12820	571.3	609	535.6	484.7	443.3	417.3	569	579.2	643.8	433.7	407.9	425	585.2	591.9	499.1	555.9	470.5	475.2
AT1G12830	196.1	150.3	148.7	265.4	232.1	237.3	165.8	174.4	149.2	222.9	230.2	269.2	140	131	152	243.9	203	210.7
AT1G12840	2590.8	2626.8	2441.8	2488.4	2557.9	2563.2	2634.7	2517.8	2461.2	2434.3	2491.9	2754.1	2498	2493.1	2374.9	2431.4	2768.4	2609.6
AT1G12845	344	264	160.8	17.8	18.8	15.9	229.7	303.4	231.3	16.1	22.8	8.3	231.2	205.5	179.1	23	9.9	11
AT1G12850	903.1	892.3	952.6	644.1	569.3	552.4	966.5	924	985.3	629.4	605.4	604.5	901.6	874.7	838.6	644.9	628	584.9
AT1G12855	0	1.9	0	0	0	0	0	0	0	0	0	0	0	1.9	0	0	0	0
AT1G12860	101.6	80.9	53.3	81.8	67.4	77.8	75.6	93.6	97.1	59.2	54.6	44.4	83.2	108.4	73.7	61	27.7	45
AT1G12870	0	0	0	1	2	0	1	0	0	0	4	2.1	0	0	0	6	1	1.1
AT1G12880	146.8	139.7	141.7	133.2	159.7	166.9	119.2	148.7	148.2	115.4	155.8	119.7	140	129.1	117.5	156	150.6	127.3
AT1G12890	4	1.9	0	7.3	7.9	18.8	6.8	5.9	0	7	8.9	20.6	4.1	2.8	0.9	14	12.9	7.7
AT1G12900	807.6	368.1	312.5	5416.4	5316.1	5681.5	486.6	590.1	738	6174.7	4958.1	4527.2	557.8	740.9	503.7	6342.5	5166.3	4892.3
AT1G12910	473.7	440.4	445.2	567.6	501.9	544	535.1	436.4	446.6	543.1	631.2	557	452.3	441.1	445.9	595.9	555.7	615.6
AT1G12920	1528.7	1435.8	1391.7	1576.8	1602.7	1605.6	1298	1501.2	1352.7	1570	1532.3	1568.9	1350.9	1369.5	1375.9	1434.7	1437.2	1511.1
AT1G12930	416.4	384.5	379.8	310.5	346.1	327.3	421.7	417.7	416.5	380.5	375.1	340.4	487.8	463.7	430	387.9	348.6	331.4
AT1G12940	0	0	0	0	1	0	0	0	0	0	0	0	0	1.9	0	2	1	0
AT1G12950	143.8	150.3	150.7	384	376.9	335.8	151.2	134	185.2	380.5	704.6	427	240.4	164	168.8	334.9	485.3	474.1
AT1G12970	235.3	236.1	241.2	235	228.1	242	294.7	274.8	239.3	239.9	235.2	216.6	307.3	268.6	235.1	258.9	289.2	262.3
AT1G12980	5	1	0	14.7	6.9	0	0	2	5	0	6.9	1	5.1	0	2.8	3	1	0
AT1G12990	858.9	816.2	824	421.7	412.6	510.2	687.3	772.3	785	449.7	462.5	411.6	670.4	658.9	644.6	448.9	485.3	451
AT1G13000	519	511.7	532.6	477.3	470.1	378.9	563.2	492.5	466.6	481.8	483.3	436.3	481.8	443.9	509.3	429.9	388.3	374.2
AT1G13020	771.4	733.3	800.9	810.9	826.2	863.8	738.7	757.5	871.1	852.3	857.4	854.1	780.9	823.8	780.8	903.8	834	847.2
AT1G13030	65.4	71.3	95.5	130.1	155.7	165.1	72.7	85.7	85.1	109.4	162.8	157.8	61.9	81.1	85.8	117	146.6	136.1
AT1G13040	44.3	31.8	56.3	119.6	105.1	110.7	49.4	65	44.1	100.4	96.3	118.6	62.9	52.8	54.1	90	86.2	103.2
AT1G13050	47.3	73.2	60.3	91.3	109.1	83.5	50.4	44.3	81.1	89.3	104.2	103.1	70	65	56.9	64	84.2	86.7
AT1G13060	1449.3	1413.6	1280.2	1612.4	1491.7	1543.7	1366.8	1386	1398.8	1495.7	1524.3	1587.5	1441.2	1417.6	1334.8	1560.6	1560	1720.7
AT1G13070	2	0	1	0	0	0	2.9	0	2	0	0	1	0	0	1.9	0	2	0
AT1G13080	430.5	408.6	333.6	159.5	149.8	166.9	425.6	350.7	313.4	180.7	136	258.9	545.6	497.7	594.2	293.9	226.8	220.6
AT1G13090	354	401.8	328.6	345.1	285.6	286	381	393	333.4	322.2	293.8	328	445.2	403.4	384.3	450.9	392.2	379.7
AT1G13100	545.1	597.4	726.5	335.7	298.5	341.4	639.8	671.8	637.8	408.6	311.6	473.5	766.7	654.1	556.9	422.9	393.2	442.3
AT1G13110	3582.4	4266.9	5592.1	3781.9	3763.9	3196.2	4997.1	5171.6	4841.2	5228	5051.3	5415.3	6121.8	4871.2	5065.1	4290	4427.4	5793.2
AT1G13120	329.9	323.8	344.7	356.7	360	331.1	352.8	366.4	360.5	352.4	366.2	384.7	303.2	370.4	403.9	364.9	330.8	323.7
AT1G13130	217.2	187.9	187.9	208.8	225.1	226	215.2	204.9	206.3	187.7	158.8	266.1	257.6	200.8	171.6	183	232.8	274.4
AT1G13140	27.2	17.3	25.1	21	17.9	14.1	20.4	9.9	18	14.1	31.8	20.6	15.2	19.8	28.9	17	14.9	9.9
AT1G13145	34.2	45.3	26.1	24.1	22.8	15	37.8	34.5	29	12	15.9	32	25.4	43.4	37.3	19	14.9	20.9
AT1G13150	20.1	22.2	24.1	13.6	10.9	14.1	21.3	15.8	29	9	14.9	9.3	24.3	17.9	20.5	9	10.9	14.3
AT1G13160	483.8	494.3	540.6	993.5	953.1	874.1	466.3	480.7	470.6	829.2	895.1	902.6	435.1	415.7	454.3	724.8	804.3	753.9
AT1G13170	590.4	531	552.7	709.2	594.1	641.5	569	569.4	593.8	589.3	547.8	649.8	580.1	528.8	548.5	609.9	638.9	593.7
AT1G13180	209.2	242.8	228.1	355.6	359	348.9	226.8	234.4	270.3	333.3	357.3	354.8	271.8	214	249.1	341.9	323.9	310.6
AT1G13190	822.7	816.2	841.1	1073.2	1162.4	1057.9	770.6	767.4	790	1388.3	1187.9	1047	780.9	798.4	792	1105.7	1218.3	1192.9
AT1G13195	456.6	429.8	525.5	318.9	337.2	332.9	415.9	332	377.5	367.4	386	367.2	352.9	343.1	339.5	274.9	306.1	352.3
AT1G13200	0	1.9	0	1	0	0	0	1	2	0	0	3.1	2	0	0	3	0	0
AT1G13210	5630.1	5294.1	6974.7	7701.3	7427.6	7108.9	8101	5282.9	5343.9	8865	7742.7	7505.1	7269.9	4928.7	6123.9	6704.5	6898.6	6795.2
AT1G13220	248.4	261.1	337.6	552.9	614.9	590.8	306.3	278.8	310.4	499.9	646.1	545.7	282	263.9	292	476.9	536.8	480.7
AT1G13230	6	2.9	4	5.2	2	4.7	1.9	1	3	4	2	4.1	4.1	4.7	0.9	2	0	0
AT1G13245	1763	1870.4	2157.4	1731	1640.4	1610.3	1214.6	1271.7	1213.6	1194.6	1294.1	839.6	338.7	308.2	263.1	774.8	469.5	470.8
AT1G13250	312.8	324.7	251.2	452.2	367	294.5	270.5	287.6	260.3	249	159.8	285.7	223.1	238.5	174.4	277.9	221.9	189.9
AT1G13260	3733.3	4692.8	4036.5	2338.4	2327.8	2441.2	4021.9	4745.1	4243.5	2852.9	2501.9	2096	4342.9	4659.1	4691.1	3211.3	3366.6	2805
AT1G13270	147.8	126.2	84.4	551.8	606	471.7	107.6	150.7	148.2	545.1	658	474.5	131.8	138.6	153.9	557.9	502.2	471.9
AT1G13280	1555.9	1519.6	1397.8	948.4	843	834.7	1539.3	1400.8	1432.8	819.1	822.7	792.2	1248.5	1183.9	1131.5	723.8	699.3	751.7
AT1G13300	134.8	130.1	121.6	623.2	530.6	475.5	147.3	103.4	121.2	801.1	615.3	666.3	136.9	189.5	189.4	506.9	413	522.4
AT1G13310	3	1	0	0	0	0	1.9	3.9	0	0	2	1	4.1	0.9	0.9	0	1	0
AT1G13320	1225	1210.3	1164.6	1188.6	1222.9	1212.6	1298	1186	1187.5	1185.5	1178	1266.7	1204.9	1179.1	1214.5	1113.7	1235.1	1264.2
AT1G13330	15.1	17.3	16.1	31.5	22.8	25.3	15.5	20.7	13	24.1	19.8	25.8	19.3	15.1	15.9	21	16.8	18.7
AT1G13340	181	190.8	198	143.7	124	142.6	230.7	186.2	186.2	151.6	127	152.7	190.7	160.2	181	137	146.6	166.8
AT1G13350	653.7	696.7	825	623.2	634.8	635.9	751.3	747.7	750	631.4	692.7	612.7	743.4	775.7	719.2	627.9	574.5	594.8
AT1G13360	1508.6	1458.9	1569.6	1453	1388.5	1383.3	1529.7	1407.7	1596.1	1372.3	1893.5	1426.5	1313.4	1233.8	1309.7	1092.7	1210.3	1344.3
AT1G13370	1	0	2	4.2	2	0	0	6.9	0	9	2	7.2	0	0.9	3.7	2	4	3.3
AT1G13380	506.9	474.1	400.9	862.3	950.1	935	464.3	430.5	509.7	726.8	701.6	847.9	384.4	415.7	406.7	649.9	817.1	811
AT1G13390	1318.5	1494.6	1728.4	1477.1	1574	1550.3	1545.2	1462.8	1440.9	1547.9	1667.2	1326.5	1317.5	1111.3	1287.3	1398.7	1572.9	1370.7
AT1G13400	0	1.9	2	0	0	0	1	3.9	4	0	0	0	0	0	0	4	2	2.2
AT1G13410	25.1	40.5	27.1	54.6	59.5	67.5	29.1	23.6	31	46.2	59.5	52.6	33.5	31.1	42.9	45	55.5	50.5
AT1G13420	501.9	659.1	785.8	42	39.7	30	569	590.1	583.8	82.3	58.6	80.5	787	946.3	928.1	76	42.6	70.2
AT1G13430	1091.2	976.1	1151.6	177.3	183.5	158.5	1378.4	806.8	761	107.4	79.4	109.3	848.9	702.2	539.2	66	47.5	60.4
AT1G13440	9678.1	9962.8	7931.4	16816.8	16413.3	17386	9257.4	8944.4	9430.1	17279.3	14784.9	16638.9	8906.8	9431.3	8938.2	17260	15709.8	16295.5
AT1G13448	17.1	36.6	37.2	15.7	7.9	11.3	37.8	18.7	28	11	6.9	15.5	22.3	28.3	18.7	16	14.9	5.5
AT1G13450	527	526.1	536.6	595.9	542.5	532.7	557.4	502.4	483.6	516	589.5	531.2	562.9	588.2	536.4	442.9	478.4	497.1
AT1G13460	509.9	459.6	535.6	342	278.7	336.7	467.2	546.7	461.6	343.3	394	285.7	476.7	474.1	474.8	303.9	287.2	309.5
AT1G13470	0	0	0	2.1	0	0	1	0	0	1	1	0	0	0	0	3	0	1.1
AT1G13480	34.2	25.1	18.1	66.1	60.5	52.5	26.2	20.7	28	69.3	23.8	76.3	47.7	23.6	24.3	68	60.4	75.7
AT1G13490	1	0	0	0	0	0	0	1	1	0	0	0	1	0	0	1	0	1.1
AT1G13500	8	14.5	14.1	4.2	6.9	6.6	9.7	12.8	11	11	3	5.2	31.4	12.3	13.1	10	8.9	11
AT1G13510	31.2	20.2	22.1	21	21.8	19.7	29.1	24.6	30	23.1	16.9	28.9	47.7	27.3	35.4	24	23.8	19.8
AT1G13520	45.3	58.8	53.3	62.9	52.6	63.8	41.7	52.2	33	59.2	30.8	60.9	51.7	63.2	66.2	45	56.5	57.1
AT1G13530	76.4	66.5	70.3	28.3	19.8	24.4	89.2	56.1	47.1	24.1	23.8	41.3	77.1	75.4	105.4	22	25.8	14.3
AT1G13540	32.2	23.1	24.1	21	16.9	21.6	30.1	26.6	20	24.1	15.9	17.5	28.4	27.3	22.4	14	20.8	12.1
AT1G13550	26.1	35.7	34.2	8.4	8.9	5.6	27.1	18.7	25	7	2	5.2	31.4	22.6	28.9	2	7.9	5.5
AT1G13560	1497.5	1693.1	2066	1728.9	1852.7	1914.2	1298.9	1545.6	2051.6	1580.1	2012.6	1690.6	1559.9	1559	1656.7	1717.6	1886.8	1861.2
AT1G13570	302.7	239.9	279.4	235	241	226	282.1	234.4	277.4	278.1	244.1	215.6	306.3	286.5	307.8	280.9	254.5	251.3
AT1G13580	184	205.2	177.9	154.2	153.7	149.1	207.4	220.7	223.3	162.6	114.1	137.2	190.7	187.6	258.4	175	168.4	136.1
AT1G13590	189.1	182.1	161.8	51.4	39.7	50.6	212.3	169.4	156.2	45.2	36.7	56.7	182.6	196.1	206.2	41	19.8	26.3
AT1G13600	15.1	8.7	22.1	45.1	33.7	29.1	29.1	10.8	22	31.1	29.8	41.3	17.2	18.9	31.7	31	24.8	23
AT1G13609	0	3.9	1	8.4	9.9	21.6	1.9	2	3	11	6.9	10.3	0	0.9	1.9	14	12.9	15.4
AT1G13610	0	1	0	19.9	36.7	25.3	0	0	1	38.1	12.9	41.3	0	0	0	49	37.6	50.5
AT1G13620	1	1.9	1	16.8	11.9	15.9	1	4.9	0	10	9.9	15.5	1	0	0.9	10	9.9	12.1
AT1G13630	37.2	44.3	48.2	83.9	67.4	62.8	38.8	38.4	55.1	55.2	94.3	72.2	24.3	50	46.6	53	73.3	64.7
AT1G13635	113.6	137.8	159.8	189.9	202.3	178.2	136.7	149.7	142.2	218.8	145.9	177.4	170.4	121.6	170.7	194	186.2	207.4
AT1G13640	947.4	819.1	802.9	1599.8	1566.1	1632.8	887	916.1	907.2	1661.4	1550.1	1665.8	1057.8	1027.4	1003.7	1715.6	1695.7	1751.5
AT1G13650	0	0	1	9.4	10.9	15	1.9	0	2	11	6	8.3	0	0	0	10	5.9	3.3
AT1G13660	0	0	0	0	0	0.9	0	1	0	1	0	0	0	0	0	0	0	0
AT1G13670	461.6	456.8	512.5	1122.5	1072.1	1193.9	504.1	608.8	509.7	716.7	816.7	717.9	381.3	448.7	477.6	604.9	552.7	617.8
AT1G13680	1	0	1	3.1	1	1.9	0	1	0	1	0	0	1	0	0	0	0	0
AT1G13690	173	197.5	178.9	268.6	249.9	265.4	159	213.8	170.2	231.9	224.3	235.2	158.2	170.6	208	236.9	211	275.5
AT1G13700	208.2	259.2	219.1	614.8	547.5	681.8	202.6	201.9	227.3	775	530.9	560.1	309.3	326.1	283.6	893.8	782.5	646.4
AT1G13710	91.5	74.2	44.2	79.7	35.7	29.1	66.9	127.1	131.2	11	44.7	15.5	71	89.5	100.7	104	40.6	18.7
AT1G13730	332.9	328.6	246.2	459.5	496.9	556.1	354.8	343.8	285.4	369.4	466.4	455.9	267.8	312.9	322.8	446.9	416	400.6
AT1G13740	279.6	298.7	305.5	188.8	199.4	201.6	380	329	313.4	255	218.3	239.3	309.3	318.6	333.9	282.9	263.5	265.6
AT1G13750	101.6	102.1	85.4	66.1	54.5	88.2	101.8	78.8	95.1	58.2	68.5	89.7	89.3	81.1	122.2	82	64.4	73.5
AT1G13770	149.9	130.1	168.8	163.7	161.7	128.5	135.7	125.1	147.2	147.6	114.1	121.7	162.3	133.8	133.4	134	139.7	136.1
AT1G13780	88.5	68.4	64.3	59.8	88.3	92.8	64	58.1	88.1	87.3	85.3	86.6	94.3	72.6	83	90	105	76.8
AT1G13790	25.1	19.3	14.1	93.4	80.3	74.1	32	36.4	28	46.2	72.4	55.7	18.3	17.9	19.6	75	75.3	76.8
AT1G13800	15.1	14.5	8	37.8	25.8	30	14.5	16.7	15	32.1	42.7	50.5	18.3	13.2	27.1	36	32.7	23
AT1G13810	54.3	61.7	79.4	118.5	156.7	120	63	79.8	75.1	121.5	131	131	52.7	55.6	82.1	91	119.8	138.3
AT1G13820	114.7	101.2	123.6	525.6	655.6	695.9	123.1	100.5	136.2	705.7	611.3	584.9	132.9	133.8	114.7	621.9	671.5	674.9
AT1G13830	87.5	105	81.4	26.2	27.8	30.9	98.9	107.4	68.1	28.1	29.8	44.4	125.8	106.5	117.5	47	36.6	28.5
AT1G13860	348	366.2	313.5	245.5	216.2	247.6	258.8	355.6	385.5	221.9	189.5	234.1	275.9	298.8	386.2	235.9	196.1	175.6
AT1G13870	259.5	237	282.4	230.8	236	221.3	243.3	243.3	228.3	235.9	214.4	214.5	251.5	232.8	257.5	225.9	218.9	205.2
AT1G13880	677.9	701.5	670.2	662	660.5	722.1	666	634.4	641.8	672.6	706.6	626.1	641	625.9	667.9	710.8	719.1	727.6
AT1G13890	1	0	0	0	0	0	1.9	0	0	0	0	0	0	1.9	0	0	0	0
AT1G13900	492.8	486.6	520.5	464.7	475.1	457.7	440.1	530	540.7	594.3	574.6	626.1	571	528.8	598.9	543.9	502.2	569.6
AT1G13910	91.5	107.9	97.5	50.4	48.6	57.2	80.5	78.8	79.1	47.2	47.6	37.1	89.3	99.9	106.3	39	35.7	30.7
AT1G13920	144.8	184.1	167.8	124.8	121	121.9	176.4	177.3	182.2	133.5	149.9	119.7	175.5	181	168.8	160	115.9	132.8
AT1G13930	3596.5	4809.4	3859.7	6863.1	5642.4	5282.9	3057.4	5263.2	4355.6	7132.3	5204.2	5648.4	3879.4	4518.7	4251.7	8770	6659.9	5865.7
AT1G13940	315.8	323.8	336.6	445.9	397.7	395.8	324.7	361.5	341.4	364.4	318.6	380.6	356	379.9	361	319.9	339.7	340.2
AT1G13950	242.4	245.7	213	149	145.8	182.9	234.6	162.5	196.3	170.7	143.9	224.9	212	231.9	194	178	156.5	180
AT1G13960	927.3	890.4	1020.9	446.9	446.3	469.9	841.4	980.1	935.2	595.3	600.4	474.5	909.7	1005.7	988.8	437.9	498.2	428
AT1G13970	80.5	71.3	80.4	79.7	70.4	72.2	80.5	94.6	59.1	73.3	69.5	89.7	64.9	46.2	68.1	67	65.4	57.1
AT1G13980	996.7	901	954.6	1202.2	1214	1084.2	1012	922	950.2	1230.7	1222.6	1270.8	873.2	1016.1	971.1	1117.7	1236.1	1109.5
AT1G13990	394.2	383.5	387.9	568.6	552.4	499.9	449.8	376.3	316.4	609.3	655	518.8	369.2	311	315.3	624.9	510.1	559.7
AT1G14000	1498.5	1633.3	1765.5	1440.4	1472.8	1420.9	1579.1	1543.6	1474.9	1566	1658.3	1352.3	1661.3	1536.4	1612.8	1407.7	1468.9	1411.3
AT1G14010	596.4	601.3	575.8	552.9	507.8	609.6	677.6	576.3	529.7	542.1	557.7	590	541.6	541	517.7	533.9	579.4	651.9
AT1G14020	401.3	345	348.7	348.3	348.1	411.7	393.6	365.5	375.5	319.2	373.1	377.5	411.8	352.5	364.7	350.9	338.7	367.6
AT1G14030	90.5	83.8	38.2	299	268.8	285.1	80.5	84.7	100.1	338.3	301.7	248.6	112.6	100.9	91.4	382.9	274.4	249.1
AT1G14040	819.7	779.6	932.5	1925.1	2025.3	1928.2	870.5	837.3	835.1	2631.1	2485	2535.4	1221.1	891.7	1094.2	2140.5	2331.6	2628.3
AT1G14048	0	1	0	1	0	0	0	0	0	1	0	0	0	0	0	0	0	0
AT1G14060	165.9	204.3	166.8	378.7	465.2	462.4	148.3	203.9	209.3	339.3	430.7	440.4	126.8	169.7	178.2	324.9	383.3	383
AT1G14070	165.9	164.8	174.8	118.5	111.1	104.1	154.1	174.4	172.2	130.5	90.3	118.6	153.1	179.1	157.6	108	103	114.1
AT1G14071	1	2.9	0	4.2	2	1.9	1	2	6	1	4	2.1	2	1.9	1.9	0	2	1.1
AT1G14080	106.6	90.6	35.2	56.7	39.7	58.1	87.2	62.1	61.1	54.2	57.6	76.3	63.9	54.7	69	50	35.7	51.6
AT1G14090	69.4	86.7	68.3	78.7	111.1	111.6	55.3	84.7	63.1	100.4	133	92.8	76.1	71.6	97.9	103	114.9	101
AT1G14120	1042.9	1325	1760.5	860.2	926.3	993.2	926.7	1416.5	1303.7	1090.2	1019.2	852	945.2	1157.5	1319.9	862.8	1022.2	1044.7
AT1G14130	499.8	493.4	522.5	293.7	298.5	292.6	463.4	425.5	443.6	303.2	263	272.3	392.5	379.9	414.2	291.9	264.5	265.6
AT1G14140	116.7	137.8	101.5	201.4	236	226	137.6	112.3	144.2	211.8	237.2	241.4	145	128.2	137.1	245.9	201.1	234.8
AT1G14150	37.2	13.5	8	453.2	361	417.3	25.2	39.4	35	433.7	400.9	353.8	30.4	30.2	20.5	567.9	442.7	352.3
AT1G14160	122.7	133	125.6	37.8	27.8	32.8	167.7	148.7	113.1	31.1	22.8	29.9	159.2	153.6	139	35	31.7	17.6
AT1G14170	630.6	633.1	617	995.6	991.8	959.4	692.1	578.2	582.8	888.4	1061.9	1039.7	666.3	639.1	617.5	831.8	1137.1	1084.2
AT1G14180	41.2	42.4	40.2	113.3	81.3	96.6	43.6	41.4	49.1	77.3	62.5	106.2	43.6	48.1	42	86	91.1	83.4
AT1G14182	14.1	10.6	9	3.1	4	2.8	9.7	9.9	4	4	2	0	14.2	14.1	3.7	0	0	2.2
AT1G14185	111.6	95.4	141.7	145.8	124	104.1	94	83.7	75.1	66.3	57.6	91.8	37.5	33	24.3	87	36.6	38.4
AT1G14190	140.8	163.8	166.8	316.8	323.3	313.2	113.4	104.4	124.2	201.8	152.8	268.2	59.8	78.2	96.1	158	111.9	165.7
AT1G14200	86.5	98.3	90.4	144.8	164.6	209.1	81.4	117.2	150.2	138.5	256	132	109.5	122.5	117.5	144	215.9	240.3
AT1G14205	10.1	5.8	8	14.7	20.8	28.1	6.8	10.8	14	22.1	22.8	19.6	9.1	14.1	14	20	17.8	16.5
AT1G14210	1200.8	1296.1	1518.3	2483.2	2512.2	2576.3	1229.2	1188	1344.7	2252.6	2201.2	2493.1	1315.4	1335.6	1379.6	1897.6	1890.8	2405.5
AT1G14220	13.1	9.6	5	17.8	14.9	22.5	8.7	7.9	9	22.1	14.9	23.7	5.1	9.4	9.3	17	13.9	25.2
AT1G14230	609.5	557	554.7	467.9	474.1	460.5	591.3	639.3	576.7	492.9	454.5	465.2	627.8	627.7	644.6	484.9	467.5	428
AT1G14240	381.2	549.3	627	275.9	261.8	242.9	373.2	412.7	432.6	278.1	249.1	304.3	444.2	446.8	515.8	287.9	266.4	257.9
AT1G14250	0	0	0	21	14.9	13.1	0	0	0	10	35.7	13.4	0	0	0	10	5	11
AT1G14260	31.2	28.9	35.2	53.5	65.5	55.3	30.1	21.7	23	72.3	51.6	57.8	19.3	26.4	26.1	61	66.4	77.9
AT1G14270	153.9	109.9	66.3	365.1	384.8	394.8	101.8	118.2	107.1	403.5	394	317.7	123.7	123.5	124.1	450.9	376.4	396.2
AT1G14280	932.3	909.7	1016.9	392.4	436.4	487.7	650.4	819.6	846.1	336.3	337.4	250.7	518.3	579.7	551.3	233.9	171.4	176.7
AT1G14290	668.8	678.4	708.4	663	583.2	633.1	700.8	788.1	701.9	717.8	821.7	728.2	686.6	767.2	734.1	734.8	723	756.1
AT1G14300	148.8	162.9	203	335.7	379.9	389.2	123.1	176.3	170.2	287.1	455.5	382.7	132.9	166.8	155.8	315.9	374.4	375.3
AT1G14310	89.5	77.1	80.4	128	145.8	148.2	90.2	89.6	82.1	144.6	154.8	156.8	93.3	79.2	95.1	128	136.7	176.7
AT1G14315	0	0	0	0	0	0	0	1	1	0	0	1	0	0	0	1	0	0
AT1G14320	5112.1	5501.3	4495.8	6456	6944.6	6899.8	4636.5	4854.4	5148.6	6047.2	6301.8	7025.5	4520.3	4770.3	4887.9	6291.6	6204.3	7103.6
AT1G14330	708	903.9	980.7	1014.5	979.9	1072	866.6	793	833.1	1157.4	1199.8	955.2	783	751.2	839.5	1015.8	1204.4	1068.9
AT1G14340	268.5	244.8	283.4	235	207.3	224.1	250.1	234.4	262.3	266	191.5	215.6	270.8	251.7	264	257.9	255.5	245.8
AT1G14345	136.8	86.7	44.2	350.4	376.9	424.8	96	125.1	109.1	371.4	297.7	330.1	121.7	129.1	116.6	497.9	356.6	376.4
AT1G14350	632.6	615.7	689.3	128	112.1	188.5	632	688.6	581.7	137.5	124.1	112.4	609.5	622.1	668.8	113	120.8	121.8
AT1G14360	214.2	237	161.8	335.7	395.7	408.9	232.6	241.3	257.3	323.2	384.1	448.7	217	238.5	229.5	444.9	476.4	439
AT1G14370	950.4	937.6	1087.3	716.5	641.7	701.5	1128.3	964.4	974.3	937.6	879.3	777.7	1384.4	1223.4	1212.7	844.8	849.8	852.7
AT1G14380	921.2	848.9	869.2	828.8	727	770	911.2	911.2	819.1	940.6	756.2	887.1	957.4	944.4	909.5	1040.8	934	828.5
AT1G14390	121.7	131.1	96.5	101.8	60.5	77.8	118.3	111.3	101.1	51.2	70.5	65	63.9	97.1	59.7	50	48.5	35.1
AT1G14400	2940.7	2989.1	2766.4	1799.2	1719.8	1670.3	2867.4	2707	2634.4	1826	1727.8	1750.4	2907.7	2814.5	2779.8	1765.6	1805.6	1825
AT1G14410	95.5	100.2	101.5	254.9	299.5	250.4	95	113.3	108.1	191.7	204.4	218.7	81.1	72.6	94.2	249.9	198.1	214
AT1G14420	0	1.9	0	5.2	12.9	4.7	0	0	0	6	5	8.3	0	0	0	7	6.9	7.7
AT1G14430	38.2	30.8	32.2	239.2	393.7	322.6	22.3	35.5	33	215.8	166.7	346.6	29.4	25.4	33.6	175	214.9	330.3
AT1G14440	79.5	46.3	25.1	39.9	31.7	26.3	70.8	80.8	79.1	34.1	8.9	5.2	68	63.2	71.8	43	24.8	11
AT1G14450	655.7	734.3	567.7	763.7	739.9	804.7	653.4	707.3	676.9	782	751.3	813.8	604.5	662.6	606.3	863.8	754.7	936.1
AT1G14455	4	2.9	3	3.1	2	2.8	2.9	3	3	0	2	1	3	2.8	2.8	0	2	1.1
AT1G14460	373.1	393.2	389.9	222.4	243	265.4	444	507.3	436.6	218.8	190.5	248.6	425	380.8	380.6	238.9	245.6	210.7
AT1G14470	27.2	37.6	23.1	54.6	46.6	56.3	21.3	33.5	18	46.2	36.7	51.6	25.4	36.8	27.1	53	39.6	52.7
AT1G14480	641.7	701.5	743.6	596.9	688.3	750.3	634	694.5	688.9	792	627.2	726.2	697.8	716.3	793.8	558.9	675.5	701.2
AT1G14490	3	2.9	8	8.4	7.9	5.6	6.8	8.9	17	10	3	8.3	8.1	4.7	8.4	6	5.9	1.1
AT1G14500	67.4	79	91.4	5.2	7.9	4.7	42.7	36.4	43.1	4	3	4.1	3	0.9	1.9	1	5	1.1
AT1G14510	728.1	740.1	729.5	873.9	979.9	1044.8	717.3	743.7	702.9	884.4	984.5	943.8	674.5	697.5	724.8	889.8	939	950.4
AT1G14518	0	0	0	0	0	0	2.9	0	1	0	0	1	2	0	0	0	1	0
AT1G14520	288.6	384.5	423	240.2	242	228.8	272.4	360.5	324.4	219.8	258	241.4	283	357.2	368.5	219.9	305.1	275.5
AT1G14530	176	148.4	115.6	118.5	127	132.2	141.5	144.8	144.2	122.5	148.9	130	143	155.5	136.2	128	122.8	146
AT1G14540	237.4	214.9	205	251.8	264.8	225.1	507.9	247.3	237.3	294.1	354.3	389.9	537.5	271.5	381.5	349.9	343.7	327
AT1G14550	22.1	7.7	6	16.8	9.9	13.1	21.3	6.9	11	15.1	15.9	9.3	30.4	11.3	14	19	9.9	4.4
AT1G14560	431.5	450	412	378.7	406.6	399.5	478.9	415.7	409.5	397.5	396	342.5	372.2	415.7	403.9	328.9	354.6	323.7
AT1G14570	1178.7	1182.4	1149.6	995.6	1014.6	1004.4	1226.2	1248.1	1106.4	966.7	985.5	1060.4	1264.7	1239.5	1212.7	1029.8	942.9	975.6
AT1G14580	390.2	301.6	368.8	128	148.8	132.2	381.9	324.1	327.4	175.7	152.8	123.8	448.3	363.8	414.2	178	140.6	166.8
AT1G14590	150.9	156.1	159.8	117.5	124	118.2	124.1	188.1	213.3	122.5	184.6	98	149.1	154.6	179.1	116	112.9	138.3
AT1G14600	24.1	25.1	21.1	16.8	16.9	17.8	19.4	30.5	16	16.1	11.9	12.4	29.4	26.4	28	15	13.9	12.1
AT1G14610	2101	2009.1	2335.3	2722.4	2840.5	2965.5	2102.5	2072.6	2130.7	2514.6	2604.1	2794.3	1944.2	2018	2087.6	2448.4	2633.6	2427.5
AT1G14620	148.8	201.4	130.6	390.3	421.5	484.9	201.6	155.6	190.2	323.2	375.1	461.1	144	179.1	147.4	350.9	387.3	464.2
AT1G14630	30.2	59.7	41.2	173.1	203.3	202.6	45.6	57.1	57.1	102.4	116.1	197	28.4	19.8	32.6	197	145.6	125.1
AT1G14640	50.3	57.8	97.5	168.9	226.1	227	52.3	59.1	70.1	252	355.3	215.6	70	61.3	76.5	212	233.7	275.5
AT1G14642	8	6.7	11.1	21	19.8	26.3	3.9	6.9	7	23.1	30.8	22.7	5.1	5.7	8.4	22	23.8	23
AT1G14650	1402	1392.4	1647	1488.6	1530.3	1499.6	1386.2	1454	1426.8	1572	1534.3	1519.4	1319.5	1386.5	1451.4	1516.7	1453	1390.4
AT1G14660	90.5	92.5	98.5	98.6	84.3	91	79.5	105.4	100.1	90.3	109.2	76.3	105.5	109.3	116.6	95	92.1	83.4
AT1G14670	2924.7	3009.4	2791.5	3020.3	3022	2948.6	2892.6	3018.2	3181.1	2836.9	2971.3	3134.7	2738.4	2710.8	2707	2668.4	3130.9	3137.5
AT1G14680	20.1	20.2	17.1	33.6	17.9	13.1	12.6	19.7	21	26.1	26.8	20.6	24.3	17.9	15.9	29	16.8	35.1
AT1G14685	582.3	622.5	523.5	690.3	743.9	721.2	573.9	679.7	643.8	659.5	684.8	621	566.9	662.6	626.8	657.8	638.9	667.2
AT1G14686	3	7.7	3	1	1	4.7	2.9	3	1	1	2	4.1	6.1	6.6	4.7	3	0	1.1
AT1G14687	34.2	16.4	16.1	28.3	29.8	28.1	19.4	21.7	36	39.2	36.7	33	26.4	28.3	25.2	56	44.6	45
AT1G14688	2	0	0	0	0	0	0	1	1	0	0	0	0	0	0	0	0	3.3
AT1G14690	777.4	835.5	775.8	845.6	799.4	832.8	934.5	829.4	731.9	968.7	809.8	905.6	678.5	658.9	667	847.8	680.4	673.8
AT1G14700	727.1	625.4	581.8	431.2	384.8	395.8	671.8	697.4	530.7	447.7	347.3	378.6	572	537.3	490.7	430.9	315	318.2
AT1G14710	1646.4	1863.6	2084.1	2337.4	2420	2427.2	1508.3	1850.9	2018.6	1877.2	2237.9	2430.2	1635.9	1785.2	1859.1	2033.5	2121.6	2145.4
AT1G14720	1191.8	1439.6	1772.6	1588.3	1745.6	1714.4	1310.6	1437.2	1528	1592.1	1460.8	1915.5	1407.7	1415.7	1437.5	1665.6	1764	1905.1
AT1G14730	738.2	1006	1090.3	413.3	384.8	375.1	826.9	1002.8	933.2	392.5	353.3	399.2	868.2	796.5	976.6	357.9	388.3	336.9
AT1G14740	3057.4	2867.7	3431.6	2871.3	3025	3046.2	3362.7	3037.9	2916.8	3399	3593.5	2950	3208	3050.1	3170.6	2965.3	3345.8	3347.1
AT1G14750	18.1	15.4	9	14.7	49.6	39.4	16.5	12.8	9	21.1	21.8	36.1	21.3	14.1	19.6	32	35.7	27.4
AT1G14755	1	1	1	0	0	0	1	0	1	0	0	0	0	0	0	0	0	0
AT1G14760	5	6.7	2	5.2	4	3.8	6.8	9.9	8	2	4	2.1	6.1	14.1	11.2	7	2	0
AT1G14770	69.4	83.8	91.4	77.6	94.2	82.5	79.5	75.9	87.1	101.4	80.4	79.4	85.2	89.5	87.7	86	89.1	86.7
AT1G14780	582.3	620.6	930.5	678.8	884.7	832.8	711.5	638.3	795	1368.2	1678.2	910.8	894.5	768.2	860	1131.7	1519.4	1703.2
AT1G14790	316.8	291	335.6	352.5	305.5	323.6	401.3	320.1	287.4	414.6	233.2	351.7	396.6	354.4	335.8	395.9	395.2	385.2
AT1G14810	565.2	544.4	497.4	1778.2	1871.5	1791.3	540.9	525	626.8	1857.1	2133.7	1877.3	491.9	536.3	539.2	1653.6	1676.9	1819.5
AT1G14820	174	199.5	154.7	206.7	198.4	223.2	161.9	177.3	180.2	213.8	178.6	202.2	166.3	146.1	162.3	242.9	229.8	211.8
AT1G14830	2423.8	2464	2596.6	2494.7	2837.5	2612.9	2594	2593.7	2584.3	2509.6	2680.5	2638.5	2384.4	2431.8	2441.2	2297.5	2762.4	2604.2
AT1G14840	192.1	150.3	145.7	139.5	131.9	121.9	198.7	243.3	208.3	129.5	143.9	159.9	186.6	184.7	176.3	161	179.3	121.8
AT1G14850	642.7	648.5	542.6	898	986.8	885.3	597.1	597	645.8	860.3	1021.2	947.9	633.9	629.6	674.4	763.8	897.4	831.8
AT1G14860	305.7	345.9	363.8	79.7	79.3	83.5	344.1	279.8	327.4	115.4	128	110.4	417.9	403.4	412.3	98	75.3	77.9
AT1G14870	2037.6	1735.5	2390.6	1139.3	1319.1	1308.3	2502.9	1788.9	2033.6	1801.9	1923.3	1413.1	2844.9	2029.3	2453.3	1226.7	1292.6	1569.3
AT1G14880	0	0	0	3.1	0	0	0	0	0	0	0	0	0	0	0	0	0	0
AT1G14890	1403	1288.4	1658	563.4	631.8	584.3	1188.4	1515	1905.5	868.3	1017.2	735.4	1595.4	1818.2	1723.8	737.8	659.6	797.8
AT1G14900	1104.3	1091.8	991.8	720.7	754.8	786.9	1059.5	1123	1219.6	665.6	634.1	781.9	1240.4	1278.1	1037.3	691.8	783.5	763.8
AT1G14910	993.7	885.6	888.3	872.8	774.6	757.8	916	919.1	932.2	911.5	818.7	868.5	918.9	953.9	976.6	787.8	763.6	809.9
AT1G14920	595.4	513.6	466.3	567.6	482	461.4	382.9	479.7	518.7	490.9	465.4	405.4	402.6	449.6	385.2	404.9	340.7	340.2
AT1G14930	3	86.7	0	5.2	0	0	115.4	4.9	6	0	0	6.2	27.4	62.2	39.2	2	9.9	5.5
AT1G14940	0	16.4	0	0	0	0	1	0	0	0	0	0	3	2.8	1.9	0	0	0
AT1G14950	6	167.7	0	1	0	0	6.8	2	2	0	0	0	61.9	6.6	2.8	0	4	0
AT1G14960	67.4	92.5	86.4	31.5	24.8	19.7	87.2	47.3	71.1	22.1	29.8	34	103.4	81.1	80.2	32	39.6	17.6
AT1G14970	89.5	82.9	92.4	131.1	132.9	121.9	92.1	83.7	112.1	91.4	118.1	111.4	90.3	90.5	90.5	120	127.8	139.4
AT1G14980	719.1	795.9	663.2	1436.2	1534.3	1732.2	796.8	773.3	855.1	1012.9	1462.8	1591.6	648.1	781.4	722.9	1273.7	1430.2	1536.4
AT1G14990	141.8	175.4	164.8	171	164.6	185.7	190	151.7	156.2	163.6	152.8	152.7	161.3	176.3	140.9	162	169.4	241.4
AT1G15000	189.1	257.3	198	307.4	334.2	347.9	180.3	231.5	230.3	307.2	323.5	352.8	200.8	221.5	242.5	257.9	357.6	368.7
AT1G15002	3	1	1	2.1	3	1.9	1.9	0	1	4	1	3.1	3	3.8	2.8	0	6.9	5.5
AT1G15010	1079.1	1459.9	2004.7	1275.7	1336.9	1433	1158.4	1194.9	1954.5	1848.1	2042.4	1335.8	1603.5	1757.9	1982.2	1840.6	1571.9	1780
AT1G15015	0	1.9	0	0	0	0	0	0	4	1	0	1	0	0.9	1.9	0	0	2.2
AT1G15020	708	654.3	658.2	505.7	529.6	501.8	620.4	660	642.8	640.5	564.7	585.9	644	710.7	653.9	566.9	559.6	545.4
AT1G15030	428.4	364.2	362.8	677.7	624.8	661.2	377.1	366.4	395.5	742.8	787	646.7	444.2	412.8	421.6	668.8	630.9	659.5
AT1G15040	1082.2	792.1	856.1	247.6	427.5	453.9	1062.4	559.5	897.2	817.1	562.7	569.4	1163.3	1319.6	1604.4	491.9	498.2	514.7
AT1G15050	31.2	22.2	15.1	0	8.9	8.4	17.4	17.7	16	1	2	1	16.2	26.4	16.8	2	2	3.3
AT1G15060	373.1	319.9	333.6	320	337.2	332.9	343.2	356.6	369.5	337.3	294.7	317.7	431	366.7	310.6	318.9	317.9	352.3
AT1G15080	65.4	71.3	60.3	83.9	90.3	86.3	49.4	51.2	48.1	103.4	59.5	99	59.8	68.8	63.4	91	99	94.4
AT1G15100	540.1	635	751.6	211.9	244	221.3	742.5	758.5	791	325.2	367.2	414.7	1208.9	1084.9	1204.3	378.9	374.4	418.1
AT1G15110	529	563.7	502.4	384	368.9	379.8	584.5	517.2	472.6	359.4	450.6	433.2	546.7	476.9	478.5	335.9	397.2	369.8
AT1G15120	1317.5	1330.8	1183.7	836.1	896.6	792.5	1257.3	1197.8	1312.7	878.4	898.1	905.6	1269.8	1248.9	1204.3	936.8	869.6	977.8
AT1G15125	56.3	61.7	51.2	3668.6	3780.7	3091.2	64	36.4	51.1	4809.4	5201.2	5331.8	84.2	52.8	58.8	3816.1	3074.4	4344.7
AT1G15130	2798.9	2720.3	3003.5	2258.7	2357.5	2135.5	2694.8	2636	2762.6	2562.8	2596.1	2331.2	2725.2	2739.1	2708.9	2324.5	2502.9	2502.1
AT1G15140	381.2	382.6	365.8	1326	1543.2	1388	357.7	366.4	387.5	1404.4	1567	1366.7	330.6	333.7	303.2	1373.7	1467.9	1471.6
AT1G15150	0	1	0	39.9	58.5	48.8	0	1	0	36.1	42.7	57.8	0	0	0	42	41.6	53.8
AT1G15160	50.3	49.1	52.3	78.7	87.3	83.5	60.1	59.1	52.1	101.4	55.6	78.4	60.9	45.2	63.4	90	94.1	79
AT1G15165	46.3	61.7	44.2	64	56.5	65.6	53.3	69	43.1	76.3	92.3	74.3	58.8	45.2	54.1	73	80.2	77.9
AT1G15170	184	187.9	163.8	363	407.6	386.4	180.3	174.4	187.2	481.8	407.9	429.1	177.5	179.1	187.5	444.9	482.4	462
AT1G15175	10.1	15.4	7	15.7	8.9	11.3	13.6	6.9	10	19.1	6	8.3	4.1	8.5	6.5	13	9.9	8.8
AT1G15180	211.2	187.9	142.7	289.5	270.8	299.2	208.4	183.2	186.2	384.5	292.8	250.7	216	178.1	198.7	296.9	313	271.1
AT1G15190	38.2	53	47.2	26.2	16.9	15	40.7	55.2	40.1	23.1	22.8	16.5	32.5	33.9	48.5	16	29.7	17.6
AT1G15200	797.5	853.8	956.6	940	952.1	951.9	799.7	873.8	913.2	862.3	1002.3	898.4	805.3	862.4	868.4	852.8	845.9	853.8
AT1G15210	3602.5	3616.4	4039.5	2114.9	2057	1887	3325.9	3816.2	4263.5	2433.3	2408.6	2736.5	3263.7	3496.9	3981.2	2625.4	2892.2	3004.7
AT1G15215	71.4	51.1	57.3	74.5	70.4	64.7	68.8	72.9	92.1	66.3	64.5	66	42.6	71.6	65.3	68	76.3	80.1
AT1G15220	160.9	151.3	138.7	112.3	94.2	97.5	131.8	136.9	161.2	124.5	108.2	116.6	149.1	144.2	158.6	118	121.8	129.5
AT1G15230	373.1	325.7	275.3	260.2	265.8	284.2	360.6	321.1	312.4	296.1	270.9	297.1	469.6	381.7	348.9	335.9	281.3	306.2
AT1G15240	992.7	920.3	1021.9	798.4	749.8	766.2	895.7	915.1	895.2	760.9	807.8	670.5	992.9	970.8	918.8	721.8	753.7	708.9
AT1G15250	184	168.6	137.7	248.6	229.1	227.9	138.6	184.2	169.2	185.7	222.3	235.2	135.9	143.3	155.8	195	206	267.8
AT1G15260	81.5	37.6	35.2	19.9	13.9	20.6	48.5	69	81.1	26.1	21.8	8.3	48.7	44.3	40.1	24	19.8	8.8
AT1G15270	1743.9	1885.8	1798.7	1297.7	1424.2	1359	1797.2	1822.4	1808.3	1322.1	1293.1	1289.4	1786	1800.3	1655.7	1458.7	1278.7	1431
AT1G15280	1233	1308.6	1484.2	1161.3	1154.5	1155.4	1183.6	1365.3	1321.7	1121.3	1130.3	1134.6	1219.1	1347.9	1357.2	1151.7	1070.7	1071.1
AT1G15290	506.9	351.7	244.2	1383.7	1462.9	1607.5	507.9	427.5	474.6	1840.1	1365.5	1424.5	507.1	473.2	471.1	1949.6	1385.7	1242.3
AT1G15300	99.6	132	100.5	64	88.3	99.4	111.5	120.2	110.1	84.3	99.2	89.7	109.5	115.9	102.6	87	85.2	79
AT1G15310	236.3	278.5	247.2	232.9	240	199.8	203.6	267.9	258.3	216.8	176.6	215.6	230.2	207.4	264.9	215	227.8	242.5
AT1G15320	2	1	0	0	2	0.9	1.9	0	0	4	0	0	0	0.9	2.8	0	0	0
AT1G15330	36.2	31.8	15.1	27.3	6.9	30.9	8.7	38.4	26	55.2	10.9	6.2	34.5	41.5	24.3	20	17.8	84.5
AT1G15340	1412	1298	1361.6	1386.9	1330	1389.9	1312.5	1433.3	1318.7	1292	1370.5	1307.9	1354	1370.5	1358.2	1427.7	1267.8	1186.3
AT1G15350	2418.8	2560.3	2761.4	674.6	690.3	590.8	2714.2	2446.9	2540.3	732.8	752.2	692.1	2788.1	2615.6	2479.4	640.9	639.8	719.9
AT1G15360	1	0	2	0	1	0	0	2	3	1	0	1	1	2.8	1.9	0	2	0
AT1G15370	690.9	712.1	735.6	662	708.1	677.1	760.9	647.2	644.8	685.6	673.8	652.9	716	648.5	674.4	692.8	645.8	768.2
AT1G15380	370.1	266	245.2	50.4	52.6	41.3	411	172.4	218.3	157.6	89.3	60.9	264.7	265.8	280.8	102	94.1	99.9
AT1G15385	9.1	3.9	3	2.1	2	10.3	3.9	0	1	2	1	1	4.1	0.9	3.7	2	5.9	2.2
AT1G15390	124.7	132	98.5	258.1	255.9	285.1	114.4	113.3	116.1	264	284.8	272.3	103.4	103.7	101.7	302.9	252.6	271.1
AT1G15400	1539.8	1608.3	1625.9	973.5	884.7	852.5	1510.3	1496.3	1439.9	1046	972.6	1037.7	1534.5	1659.9	1562.5	1043.8	940.9	1063.4
AT1G15405	14.1	13.5	9	15.7	7.9	13.1	12.6	15.8	6	10	27.8	10.3	9.1	8.5	13.1	13	11.9	8.8
AT1G15410	632.6	569.5	590.9	497.3	553.4	512.1	580.6	571.3	515.7	383.5	432.7	453.9	483.8	414.7	388	316.9	391.2	412.6
AT1G15415	2	8.7	3	12.6	7.9	6.6	5.8	8.9	9	16.1	10.9	6.2	4.1	6.6	2.8	6	6.9	12.1
AT1G15420	310.8	367.1	373.8	491	527.6	483	290.8	343.8	335.4	382.5	513.1	490	275.9	317.6	391.8	405.9	425.9	489.4
AT1G15430	512.9	531	576.8	527.7	557.4	541.1	510.9	470.9	523.7	580.2	628.2	495.1	527.4	482.6	466.4	432.9	583.4	624.4
AT1G15440	348	427.8	466.3	762.7	881.7	733.4	307.3	392.1	440.6	563.2	774.1	775.7	309.3	360.1	383.4	588.9	624	647.5
AT1G15450	0	0	0	0	0	0	0	0	0	2	0	0	0	0	0	0	0	0
AT1G15460	16.1	18.3	24.1	18.9	23.8	19.7	15.5	16.7	22	14.1	6.9	17.5	16.2	19.8	21.5	26	12.9	14.3
AT1G15470	202.2	177.3	165.8	205.6	209.3	242.9	196.8	200	195.3	204.8	170.7	219.7	234.3	182.9	198.7	236.9	210	208.5
AT1G15480	89.5	78.1	60.3	263.3	262.8	254.2	72.7	77.8	70.1	145.6	240.2	234.1	70	75.4	89.5	218.9	220.9	187.7
AT1G15490	287.6	282.3	335.6	252.8	236	241	317	318.2	353.5	238.9	267.9	264.1	347.9	354.4	374.1	216	235.7	242.5
AT1G15500	2518.3	2299.2	2128.3	3527	3354.3	3310.6	2638.6	2406.5	2639.4	4294.5	3442.7	3415.2	2571	2780.6	2593.2	3787.1	3337.9	3534.8
AT1G15510	36.2	53	35.2	104.9	90.3	143.5	33	62.1	49.1	90.3	101.2	100.1	40.6	49	61.6	134	123.8	103.2
AT1G15520	72.4	305.5	197	353.5	425.5	335.8	97.9	254.1	143.2	267	305.7	262	47.7	133.8	108.2	118	136.7	170.1
AT1G15530	495.8	540.6	570.8	622.1	609	556.1	592.3	536.9	589.8	736.8	659.9	592.1	669.4	584.4	593.3	593.9	631.9	580.5
AT1G15540	1	1	0	0	2	0.9	2.9	3.9	2	2	3	1	5.1	0.9	0	0	0	0
AT1G15550	198.1	265	213	259.1	265.8	242	210.4	314.2	289.4	199.8	134	240.3	186.6	215.8	209.9	220.9	102	115.2
AT1G15560	1	0	0	1	0	0	0	0	0	0	0	0	1	0	0.9	0	0	0
AT1G15570	382.2	347.9	408	303.2	339.2	332.9	223.9	200	231.3	206.8	250.1	339.4	97.4	111.2	113.8	194	230.8	235.9
AT1G15580	4098.3	4424	5706.6	2352	2813.7	2546.3	1707	2407.5	2141.8	491.9	841.6	418.8	101.4	111.2	120.3	89	161.4	225
AT1G15590	2	7.7	5	0	0	0.9	3.9	2	1	0	0	0	0	0	0.9	0	0	0
AT1G15600	26.1	31.8	42.2	0	0	0	3.9	10.8	9	0	0	0	2	0	3.7	0	0	0
AT1G15610	1	1.9	1	0	0	0	2.9	1	0	0	0	0	0	1.9	0	0	0	0
AT1G15620	6	3.9	1	0	0	0	10.7	2	7	0	0	0	0	0.9	0.9	0	0	0
AT1G15630	32.2	18.3	21.1	12.6	6.9	8.4	38.8	18.7	13	8	5	10.3	12.2	21.7	17.7	10	5.9	5.5
AT1G15640	209.2	199.5	287.4	48.3	57.5	54.4	249.1	131	157.2	39.2	47.6	42.3	275.9	181	215.5	37	48.5	35.1
AT1G15660	359	319.9	313.5	310.5	333.2	322.6	313.1	302.4	289.4	301.2	227.3	290.9	347.9	329	326.5	284.9	289.2	280.9
AT1G15670	2977	3167.4	3433.6	1885.2	1661.3	1505.3	3495.5	2759.2	2908.7	1558	2345.1	1662.8	2938.2	2498.7	2616.5	1871.6	2102.8	2181.7
AT1G15680	1	0	0	0	0	0.9	0	0	0	0	0	0	0	0	0	1	1	1.1
AT1G15690	9594.6	9588.9	7849	13827.9	14177.8	13540.8	9127.5	9188.7	9774.6	13339.1	12474.5	13939.5	9702	9804.6	9096.7	14043.8	14371.7	14123.7
AT1G15700	83.5	81.9	93.5	82.9	67.4	89.1	94	81.8	88.1	74.3	66.5	74.3	101.4	81.1	95.1	88	78.2	82.3
AT1G15710	276.6	253.4	278.3	241.3	318.4	264.5	251.1	272.9	289.4	292.1	280.9	274.4	290.1	253.5	260.3	241.9	304.1	287.5
AT1G15720	46.3	47.2	45.2	57.7	64.5	66.6	44.6	53.2	43.1	64.2	59.5	55.7	37.5	38.6	48.5	53	69.3	68
AT1G15730	228.3	196.6	187.9	495.2	584.2	532.7	202.6	192.1	230.3	549.1	567.7	493.1	238.3	211.1	216.4	562.9	461.6	508.1
AT1G15740	1213.9	1082.1	1188.8	769	628.8	687.4	1281.5	1104.3	1128.5	956.7	687.7	760.2	1477.7	1496.8	1432.8	973.8	802.3	752.8
AT1G15750	4400.1	4323.7	4442.5	4041.1	4612.9	4702.4	4452.3	4597.3	4349.6	4041.5	4346.7	4321.9	4090.3	4240.6	4365.5	3839.1	4408.6	4391.8
AT1G15760	71.4	89.6	62.3	89.2	129.9	103.2	79.5	61.1	79.1	67.3	61.5	74.3	42.6	54.7	47.6	62	63.4	60.4
AT1G15770	2	1	3	2.1	2	6.6	0	0	0	4	1	2.1	0	1.9	0	3	0	1.1
AT1G15772	2	2.9	0	5.2	4	2.8	0	2	5	0	5	4.1	4.1	6.6	3.7	4	5.9	1.1
AT1G15780	1526.7	1458.9	1645	1237.9	1316.1	1173.3	1565.5	1530.8	1594.1	1263.8	1333.8	1293.5	1537.5	1493	1500.9	1266.7	1270.8	1201.7
AT1G15790	75.4	123.3	93.5	77.6	66.5	60	97.9	90.6	96.1	74.3	79.4	75.3	93.3	100.9	60.6	87	63.4	113
AT1G15800	147.8	140.7	149.7	215.1	171.6	196.9	161.9	154.7	150.2	281.1	271.9	210.4	154.2	179.1	162.3	221.9	230.8	279.8
AT1G15810	519	511.7	426.1	621.1	616.9	557.1	538	495.5	514.7	540.1	504.1	642.6	504.1	485.4	459.9	574.9	574.5	547.6
AT1G15820	2319.2	1062.9	658.2	6433	5855.6	6007	1362.9	1619.5	1719.2	8499.6	5461.2	4481.8	1585.2	1722.1	1309.7	8387.1	5440.6	5713.1
AT1G15825	9.1	3.9	4	13.6	10.9	15	1	3.9	7	15.1	15.9	10.3	8.1	2.8	4.7	17	16.8	8.8
AT1G15830	21.1	12.5	11.1	30.4	23.8	22.5	17.4	4.9	13	46.2	28.8	26.8	14.2	15.1	16.8	45	27.7	42.8
AT1G15840	26.1	18.3	3	17.8	3	11.3	14.5	19.7	16	49.2	1	1	28.4	19.8	29.8	9	17.8	25.2
AT1G15860	784.5	762.2	732.5	488.9	532.6	485.8	707.6	749.6	668.9	561.2	530.9	545.7	702.8	712.6	694.9	495.9	489.3	616.7
AT1G15870	16.1	16.4	4	34.6	24.8	23.4	7.8	15.8	9	17.1	22.8	22.7	5.1	12.3	11.2	15	22.8	18.7
AT1G15880	566.2	601.3	573.8	467.9	453.3	470.8	663	626.5	588.8	519	542.8	485.8	587.2	652.3	583.9	541.9	525.9	579.4
AT1G15885	15.1	22.2	7	29.4	30.7	28.1	17.4	19.7	16	19.1	11.9	20.6	10.1	13.2	12.1	29	26.7	9.9
AT1G15890	136.8	134.9	154.7	227.7	199.4	236.3	148.3	109.3	78.1	229.9	177.6	192.9	124.7	123.5	133.4	218.9	188.2	189.9
AT1G15900	29.2	5.8	19.1	25.2	16.9	15	19.4	19.7	15	28.1	27.8	10.3	23.3	20.7	18.7	11	26.7	17.6
AT1G15910	254.4	181.2	162.8	416.5	411.6	400.5	240.4	196	252.3	408.6	362.2	418.8	222.1	231.9	243.5	459.9	404.1	360
AT1G15920	336.9	394.1	310.5	267.5	251.9	253.2	364.5	286.7	383.5	267	277.9	244.5	337.7	365.7	375.9	249.9	279.3	283.1
AT1G15930	1369.8	1304.7	1015.9	2198.9	2539	2532.2	1158.4	1207.7	1294.7	2097	2332.2	2464.2	1108.5	1248	1330.2	2156.5	2260.2	2486.7
AT1G15940	315.8	334.4	400.9	590.6	598.1	636.8	310.2	399	358.5	549.1	571.6	566.3	361.1	360.1	403.9	496.9	550.7	507
AT1G15950	2650.1	2548.8	2615.7	2006.9	2014.3	2013.6	2798.6	2498.1	2515.2	2165.3	1926.3	1997	2758.7	2505.3	2464.5	2088.5	2034.4	2255.2
AT1G15960	58.3	64.6	95.5	193	232.1	182.9	48.5	50.2	51.1	185.7	213.4	180.5	50.7	57.5	73.7	201	234.7	196.4
AT1G15970	258.5	235.1	245.2	251.8	267.8	254.2	207.4	248.2	241.3	209.8	202.5	235.2	163.3	220.6	227.6	210	235.7	199.7
AT1G15980	80.5	37.6	38.2	932.6	872.8	987.6	62	94.6	94.1	977.7	887.2	724.1	58.8	101.8	57.8	1034.8	914.2	772.6
AT1G15990	1	0	0	0	0	0	0	0	0	2	1	0	0	0.9	0.9	1	1	1.1
AT1G16000	115.7	127.2	84.4	201.4	199.4	191.3	116.3	132	143.2	166.6	159.8	210.4	129.8	94.3	110.1	202	174.3	201.9
AT1G16010	849.8	947.2	1043	587.5	616.9	583.3	833.7	978.2	995.3	667.6	714.5	580.7	930	954.8	938.4	672.8	635.9	706.7
AT1G16020	384.2	382.6	382.9	320	332.3	322.6	357.7	380.2	362.5	307.2	257	308.4	369.2	371.4	351.7	344.9	303.1	309.5
AT1G16030	139.8	123.3	117.6	81.8	123	122.9	157	156.6	243.3	107.4	169.7	125.8	182.6	164.9	135.3	117	125.8	122.9
AT1G16040	215.2	288.1	291.4	199.3	191.4	180.1	224.9	292.6	243.3	159.6	152.8	187.7	265.7	223.4	222.9	194	170.4	181.1
AT1G16060	127.7	123.3	132.6	247.6	256.9	216.6	143.5	123.1	117.2	300.2	282.8	261	109.5	139.5	152	280.9	242.7	283.1
AT1G16070	17.1	14.5	17.1	88.1	103.1	112.5	17.4	24.6	23	58.2	43.7	135.1	14.2	17	9.3	60	66.4	121.8
AT1G16080	204.2	179.2	146.7	797.3	860.9	900.3	220	223.6	170.2	845.2	858.4	801.5	197.8	245.1	212.7	867.8	918.2	928.4
AT1G16090	33.2	27.9	38.2	18.9	23.8	15.9	35.9	20.7	40.1	14.1	13.9	16.5	26.4	34.9	22.4	16	12.9	18.7
AT1G16110	279.6	195.6	228.1	159.5	102.2	106.9	252	177.3	184.2	115.4	98.2	94.9	317.4	195.1	175.4	159	120.8	95.5
AT1G16120	51.3	75.2	118.6	7.3	10.9	13.1	58.2	68	50.1	13.1	15.9	22.7	55.8	72.6	83	16	8.9	8.8
AT1G16130	631.6	641.8	792.8	296.9	316.4	307.6	805.5	687.6	551.7	486.9	327.5	310.5	1007.1	678.6	800.3	435.9	403.1	475.2
AT1G16140	16.1	22.2	15.1	0	4	1.9	14.5	9.9	18	3	1	7.2	14.2	8.5	17.7	5	1	4.4
AT1G16150	52.3	32.8	23.1	23.1	6.9	7.5	53.3	25.6	25	7	6	10.3	31.4	17	36.4	10	4	4.4
AT1G16160	35.2	39.5	23.1	4.2	6.9	1.9	53.3	25.6	22	10	7.9	4.1	36.5	31.1	36.4	5	5.9	2.2
AT1G16170	461.6	465.4	399.9	334.7	308.5	297.3	446.9	428.5	423.5	355.4	344.4	336.3	428	476.9	382.5	408.9	338.7	402.8
AT1G16180	4723.9	4950.1	4228.5	2634.2	2578.7	2339	4787.7	4353	4454.7	3234.4	2860.1	2690.1	5043.7	4635.5	4609.9	2900.3	2804	2813.8
AT1G16190	604.4	630.2	656.2	643.1	656.6	733.4	616.5	683.6	723.9	566.2	682.8	677.7	625.8	643.8	607.3	539.9	626	660.6
AT1G16210	1342.6	1354.8	1365.6	1121.5	1079.1	1132.9	1405.6	1292.4	1306.7	1325.1	1134.3	1155.3	1379.3	1370.5	1293.8	1233.7	1227.2	1352
AT1G16220	59.3	61.7	49.2	153.2	149.8	130.4	45.6	43.3	62.1	122.5	118.1	130	34.5	33.9	49.4	91	138.7	129.5
AT1G16225	0	2.9	2	2.1	2	0	0	0	0	0	0	0	0	3.8	0	4	0	4.4
AT1G16230	0	1	1	1	0	2.8	0	0	1	2	2	1	2	0	1.9	0	0	1.1
AT1G16240	1653.4	1667.1	1725.3	1201.2	1122.7	1078.5	1683.8	1506.2	1669.1	1390.3	1306	1204.8	1686.6	1638.2	1666.9	1241.7	1270.8	1294.9
AT1G16250	215.2	245.7	209	198.3	193.4	181	210.4	218.7	252.3	221.9	220.3	199.1	301.2	271.5	198.7	241.9	183.2	195.3
AT1G16260	99.6	80.9	60.3	186.7	163.6	195.1	136.7	74.9	73.1	272	164.7	138.2	101.4	77.3	68.1	253.9	186.2	188.8
AT1G16270	788.5	734.3	770.7	926.3	1015.6	951.9	704.7	787.1	748	793	917	869.5	684.6	728.6	779.8	808.8	909.2	895.5
AT1G16280	222.3	232.2	225.1	206.7	172.6	149.1	179.3	230.5	231.3	191.7	213.4	181.5	213	199.8	211.7	177	154.5	139.4
AT1G16290	0	1	0	2.1	0	0.9	0	0	0	0	0	0	0	1.9	0.9	0	1	0
AT1G16300	219.2	226.4	195.9	236	236	250.4	213.3	225.6	228.3	207.8	229.2	220.7	197.8	201.7	199.6	208	251.6	221.7
AT1G16310	121.7	164.8	130.6	92.3	61.5	74.1	142.5	134	143.2	89.3	78.4	100.1	164.3	167.8	136.2	100	71.3	97.7
AT1G16320	309.8	265	268.3	580.1	584.2	602.1	283.1	256.1	322.4	620.4	528	562.2	265.7	259.2	245.3	613.9	614.1	628.8
AT1G16330	83.5	115.6	104.5	140.6	151.7	189.4	98.9	98.5	124.2	95.4	87.3	168.1	113.6	99	109.1	102	134.7	130.6
AT1G16340	148.8	133.9	127.6	207.7	206.3	182.9	113.4	124.1	174.2	198.8	170.7	188.8	131.8	142.3	138.1	198	187.2	180
AT1G16350	712.1	700.5	540.6	977.7	1102.9	1008.2	728	628.5	713.9	1003.8	961.6	1139.8	699.8	768.2	669.8	1042.8	1093.5	1079.9
AT1G16360	16.1	12.5	10	7.3	7.9	7.5	13.6	4.9	6	5	6.9	1	7.1	8.5	4.7	7	3	2.2
AT1G16370	3128.8	3538.4	4285.7	783.7	765.7	853.4	2812.1	2993.6	3887	808.1	1024.2	753	3680.6	3442.2	3949.5	914.8	1062.8	984.4
AT1G16380	5	4.8	3	1	0	2.8	5.8	1	1	1	0	3.1	2	2.8	1.9	1	2	0
AT1G16390	402.3	638.9	668.2	610.6	691.3	769	413.9	650.1	847.1	558.1	771.1	661.2	600.4	771	816.2	833.8	1105.4	1003
AT1G16400	26.1	19.3	18.1	1762.5	1749.5	1606.5	6.8	18.7	37	2340	2046.3	1713.3	15.2	33	30.8	2113.5	2016.6	1879.9
AT1G16410	0	0	0	3196.5	2606.5	2518.1	0	0	0	3141	2750.9	2023.8	0	0.9	0	3183.3	2866.4	1767.9
AT1G16420	9.1	5.8	3	30.4	14.9	18.8	3.9	5.9	9	35.1	10.9	19.6	5.1	7.5	4.7	20	35.7	23
AT1G16430	39.2	37.6	43.2	55.6	55.5	63.8	30.1	43.3	44.1	47.2	51.6	51.6	37.5	40.5	50.4	48	59.4	58.2
AT1G16440	20.1	21.2	29.1	30.4	30.7	34.7	19.4	19.7	17	33.1	27.8	28.9	24.3	12.3	20.5	18	29.7	25.2
AT1G16445	14.1	20.2	13.1	34.6	38.7	47.8	13.6	19.7	23	33.1	49.6	39.2	17.2	25.4	20.5	47	49.5	45
AT1G16460	868.9	844.1	1012.9	1313.4	1339.9	1268	898.6	860	944.2	1617.2	1332.8	1244	880.3	947.3	923.5	1425.7	1507.5	1446.4
AT1G16470	885	910.6	795.9	848.7	850	775.6	857.9	907.2	872.1	795	777.1	863.4	824.6	882.2	902	793.8	835	841.7
AT1G16480	44.3	45.3	52.3	74.5	81.3	96.6	29.1	39.4	49.1	84.3	87.3	94.9	47.7	48.1	43.8	79	113.9	105.4
AT1G16489	2	2.9	4	1	1	0	0	3.9	8	1	0	0	4.1	5.7	1.9	1	1	0
AT1G16490	13.1	2.9	13.1	9.4	5	5.6	7.8	15.8	11	5	1	3.1	10.1	19.8	2.8	2	3	4.4
AT1G16500	56.3	39.5	40.2	22	43.6	19.7	42.7	53.2	47.1	41.2	21.8	39.2	51.7	37.7	39.2	43	31.7	42.8
AT1G16510	137.8	167.7	187.9	128	125	91.9	81.4	180.3	157.2	96.4	92.3	107.3	96.4	124.4	101.7	118	105	90
AT1G16515	30.2	39.5	32.2	4.2	8.9	9.4	18.4	48.3	25	11	4	7.2	20.3	25.4	23.3	16	8.9	13.2
AT1G16520	323.8	368.1	315.5	535	661.5	636.8	325.7	365.5	344.4	454.7	462.5	595.2	357	320.5	370.3	449.9	614.1	636.5
AT1G16530	8	16.4	11.1	40.9	51.6	56.3	16.5	12.8	29	61.2	38.7	103.1	40.6	27.3	25.2	147	112.9	127.3
AT1G16540	334.9	391.2	460.2	202.5	193.4	233.5	308.3	352.7	383.5	239.9	261	214.5	367.1	397.8	401.1	219.9	233.7	207.4
AT1G16550	67.4	72.3	53.3	83.9	95.2	85.3	78.5	63	59.1	79.3	85.3	108.3	64.9	64.1	67.2	82	83.2	80.1
AT1G16560	1132.4	1129.4	1074.2	833	835.1	820.6	1068.2	1076.7	1073.4	817.1	770.1	852	1069	1073.6	1019.6	821.8	819.1	953.7
AT1G16570	304.7	302.6	268.3	313.7	292.6	324.5	329.6	304.4	282.4	305.2	335.4	347.6	285	261.1	285.4	303.9	290.2	335.8
AT1G16590	57.3	59.7	54.3	40.9	35.7	52.5	61.1	69.9	55.1	51.2	59.5	47.4	68	73.5	58.8	65	56.5	57.1
AT1G16610	792.5	829.7	785.8	999.8	1140.6	1173.3	756.1	848.1	869.1	998.8	991.4	1064.5	753.6	807.8	781.7	918.8	1099.4	1021.7
AT1G16630	177	180.2	200	196.2	236	242.9	201.6	190.1	161.2	182.7	133	269.2	194.7	181	196.8	193	187.2	212.9
AT1G16635	6	2.9	5	3.1	10.9	5.6	8.7	3.9	2	1	4	7.2	6.1	8.5	6.5	3	5.9	2.2
AT1G16640	4	4.8	1	30.4	53.6	39.4	2.9	5.9	8	37.1	34.7	46.4	6.1	5.7	6.5	48	52.5	54.9
AT1G16650	127.7	133.9	157.8	221.4	209.3	169.8	106.6	127.1	132.2	211.8	277.9	221.8	162.3	138.6	164.2	210	224.8	243.6
AT1G16670	692.9	650.4	849.1	543.4	613.9	548.6	827.8	689.5	604.8	714.7	550.8	582.8	807.3	673.9	736	586.9	564.6	588.2
AT1G16680	231.3	244.8	255.2	252.8	264.8	238.2	263.7	245.3	315.4	271	228.3	273.3	304.3	360.1	334.9	272.9	281.3	220.6
AT1G16690	133.8	121.4	118.6	125.9	138.9	103.2	112.4	118.2	154.2	123.5	118.1	108.3	138.9	128.2	140.9	139	156.5	126.2
AT1G16700	927.3	912.5	837	969.4	964	1029.8	906.4	852.1	905.2	964.7	989.4	985.1	850.9	896.4	848.9	887.8	1020.2	1135.8
AT1G16705	1	1	1	0	2	6.6	0	3	1	0	0	0	1	2.8	1.9	6	1	2.2
AT1G16710	1096.2	1083.1	1377.7	884.4	919.4	845	1136.1	1109.2	1166.5	926.6	870.3	824.2	1079.1	1116.9	1139.9	923.8	835	849.4
AT1G16720	568.2	337.3	404	1899.9	1764.4	2105.5	529.3	495.5	492.6	2318.9	1679.1	1748.4	529.4	531.6	464.5	2559.4	1990.8	1788.8
AT1G16730	21.1	17.3	12.1	104.9	108.1	145.4	17.4	19.7	9	147.6	89.3	85.6	23.3	19.8	21.5	116	118.9	116.3
AT1G16740	358	290	329.6	398.7	479	467.1	304.4	324.1	284.4	413.6	440.6	482.7	296.2	329.9	302.2	453.9	408.1	468.6
AT1G16750	129.7	96.4	108.5	97.6	114.1	106	103.7	128.1	109.1	81.3	69.5	83.6	94.3	105.6	82.1	90	79.2	68
AT1G16770	4	6.7	3	3.1	1	4.7	0	3.9	6	8	5	4.1	4.1	1.9	1.9	1	0	2.2
AT1G16780	206.2	181.2	145.7	180.4	199.4	142.6	221	208.8	209.3	183.7	158.8	190.8	241.4	183.8	175.4	207	171.4	173.4
AT1G16790	73.4	67.5	66.3	75.5	69.4	77.8	111.5	93.6	51.1	75.3	72.4	51.6	92.3	87.7	57.8	62	51.5	75.7
AT1G16800	245.4	231.3	276.3	277	282.7	269.2	224.9	211.8	217.3	283.1	267.9	303.3	208.9	216.8	253.7	278.9	295.2	255.7
AT1G16810	817.7	789.2	831	717.6	661.5	639.6	893.8	884.6	835.1	665.6	712.5	643.6	865.1	836.1	823.7	651.9	678.5	681.5
AT1G16820	46.3	57.8	62.3	28.3	45.6	58.1	38.8	60.1	43.1	50.2	65.5	53.6	63.9	35.8	46.6	52	54.5	63.6
AT1G16825	49.3	52	41.2	44.1	49.6	54.4	36.8	51.2	62.1	53.2	62.5	46.4	60.9	44.3	49.4	45	58.4	56
AT1G16830	21.1	23.1	24.1	45.1	49.6	38.5	21.3	15.8	36	49.2	62.5	42.3	17.2	21.7	26.1	44	48.5	52.7
AT1G16840	605.4	660.1	704.4	721.8	671.4	692.1	634	737.8	804	787	1120.4	807.7	788	798.4	706.1	825.8	812.2	845
AT1G16850	1091.2	1765.3	2054.9	128	127	106	986.8	1822.4	1740.2	115.4	235.2	172.3	1663.3	1494.9	1682.8	167	186.2	174.5
AT1G16870	386.2	400.9	323.6	656.7	677.4	638.7	407.1	417.7	403.5	608.3	635.1	760.2	363.1	380.8	375.9	632.9	677.5	635.4
AT1G16880	1467.4	1321.1	1271.2	2324.8	2326.8	2374.7	1372.6	1365.3	1354.7	2454.4	2124.7	2092.9	1450.3	1520.4	1357.2	2605.4	2411.8	2103.7
AT1G16890	1616.2	1579.4	1665.1	1243.2	1252.6	1251.1	1650.8	1657.9	1651.1	1333.1	1375.5	1204.8	1722.1	1613.7	1565.3	1178.7	1249	1308.1
AT1G16900	333.9	345	263.3	297.9	313.4	296.4	349	354.6	323.4	264	279.9	317.7	339.8	363.8	344.2	330.9	316	276.5
AT1G16905	11.1	13.5	5	9.4	2	7.5	21.3	3.9	10	13.1	13.9	12.4	14.2	12.3	16.8	6	7.9	4.4
AT1G16910	0	0	0	0	0	0.9	0	1	0	0	1	0	0	0	0	1	0	0
AT1G16916	34.2	42.4	51.2	31.5	22.8	29.1	38.8	30.5	44.1	28.1	33.7	29.9	30.4	34.9	45.7	37	24.8	25.2
AT1G16920	649.7	573.4	503.4	585.4	563.3	619.9	616.5	566.4	651.8	459.8	546.8	613.7	557.8	639.1	516.8	499.9	570.5	608
AT1G16930	341.9	328.6	405	98.6	109.1	107.9	344.1	314.2	361.5	128.5	91.3	102.1	347.9	315.8	323.7	104	129.8	91.1
AT1G16960	20.1	5.8	11.1	21	20.8	21.6	8.7	16.7	22	14.1	21.8	11.3	12.2	10.4	12.1	7	21.8	25.2
AT1G16970	315.8	321.8	380.8	256	255.9	217.6	317	342.8	318.4	237.9	225.3	252.7	312.4	305.4	341.4	233.9	213	199.7
AT1G16980	2	0	0	2.1	0	0	0	0	0	0	1	2.1	0	0	0	0	0	0
AT1G17010	0	0	0	0	0	0	0	1	0	1	0	3.1	0	0	0	1	0	0
AT1G17020	235.3	282.3	304.5	289.5	267.8	242	255.9	290.6	262.3	353.4	372.2	283.7	284	302.6	311.6	287.9	326.9	324.8
AT1G17030	68.4	60.7	64.3	44.1	56.5	74.1	69.8	59.1	56.1	60.2	59.5	69.1	65.9	67.9	65.3	36	50.5	60.4
AT1G17040	102.6	106	125.6	66.1	42.6	68.5	101.8	76.8	107.1	56.2	83.4	52.6	119.7	105.6	116.6	87	80.2	60.4
AT1G17050	338.9	256.3	286.4	315.8	369.9	400.5	334.4	276.8	240.3	367.4	251.1	285.7	221.1	220.6	252.8	384.9	282.3	319.3
AT1G17060	1946.1	1710.4	2093.1	349.3	312.4	332	2196.6	1507.2	1401.8	337.3	290.8	359	1369.2	1163.1	1347.9	321.9	305.1	227.2
AT1G17070	246.4	277.5	252.2	342	365	402.3	263.7	272.9	301.4	340.3	432.7	337.3	244.4	265.8	236	309.9	331.8	385.2
AT1G17080	1813.3	2173	2470	641	705.2	740	2033.7	2199.7	2109.7	742.8	728.4	710.7	2418.9	2154.7	2290	732.8	740.9	859.3
AT1G17090	78.4	102.1	121.6	45.1	53.6	60	109.5	104.4	111.1	62.2	46.6	52.6	133.9	140.4	131.5	63	67.4	77.9
AT1G17100	280.6	123.3	115.6	979.8	1160.4	1352.4	271.4	201	276.4	982.8	917	1028.4	264.7	293.1	222.9	1107.7	1282.7	1151.2
AT1G17110	774.4	831.6	903.4	948.4	981.9	1004.4	796.8	827.5	851.1	948.6	1136.3	975.8	798.2	838.9	798.5	967.8	885.5	888.9
AT1G17120	600.4	591.7	551.7	437.5	419.5	402.3	556.4	547.7	605.8	473.8	449.6	368.2	537.5	516.5	567.1	446.9	479.4	436.8
AT1G17130	657.7	598.4	651.2	673.5	680.4	666.8	603.9	682.7	633.8	624.4	670.9	643.6	640	656	646.4	557.9	558.6	618.9
AT1G17140	639.6	589.7	686.3	329.4	325.3	367.6	647.5	678.7	635.8	235.9	238.2	307.4	583.2	585.3	567.1	269.9	244.6	240.3
AT1G17145	365.1	334.4	395.9	237.1	270.8	189.4	374.2	348.7	357.5	303.2	336.4	235.2	433.1	436.4	447.7	282.9	276.3	233.7
AT1G17147	329.9	379.7	394.9	193	158.7	167.9	426.5	391.1	318.4	250	181.6	150.6	599.4	439.2	475.7	208	155.5	144.9
AT1G17160	437.5	376.8	428.1	387.1	383.8	332	433.3	452.1	432.6	438.7	374.1	365.1	415.8	417.6	403.9	439.9	371.4	368.7
AT1G17170	705	787.3	630	476.3	443.3	430.5	477.9	677.7	475.6	717.8	434.7	371.3	396.6	523.1	595.1	496.9	426.9	436.8
AT1G17180	152.9	207.2	128.6	247.6	187.5	212.9	119.2	203.9	96.1	165.6	122.1	207.3	110.5	109.3	131.5	112	126.8	113
AT1G17190	1205.9	2114.2	2306.2	342	327.3	294.5	1155.5	2109	2116.7	433.7	483.3	432.2	1995	2501.6	2735.9	473.9	472.5	498.2
AT1G17200	322.8	326.7	318.5	292.7	332.3	311.4	307.3	365.5	365.5	454.7	326.5	297.1	365.1	372.3	367.5	473.9	383.3	449.9
AT1G17210	1694.6	1563	1560.6	1393.2	1413.3	1505.3	1613	1534.7	1526	1609.2	1373.5	1476.1	1652.2	1722.1	1625	1511.7	1449.1	1478.2
AT1G17220	962.5	606.1	514.5	2977.3	2827.6	2670.1	762.9	928.9	879.1	3489.4	2612	2462.2	759.6	951	817.1	3537.2	2849.6	2456
AT1G17230	186.1	174.4	176.9	164.7	159.7	147.2	148.3	192.1	181.2	170.7	188.6	178.4	201.8	199.8	170.7	193	200.1	154.7
AT1G17235	1	1	2	3.1	2	0	1.9	0	1	1	1	2.1	1	3.8	4.7	0	0	5.5
AT1G17240	24.1	25.1	23.1	12.6	7.9	8.4	34.9	20.7	12	9	6	3.1	20.3	23.6	15.9	9	1	5.5
AT1G17255	19.1	19.3	32.2	9.4	23.8	5.6	26.2	21.7	19	21.1	13.9	10.3	10.1	13.2	20.5	14	9.9	14.3
AT1G17260	34.2	37.6	54.3	33.6	47.6	46.9	39.7	30.5	52.1	43.2	41.7	34	28.4	33.9	45.7	34	36.6	51.6
AT1G17270	144.8	168.6	147.7	107	119	131.3	135.7	115.3	140.2	130.5	128	147.5	145	147	177.2	142	141.6	148.2
AT1G17275	0	0	0	0	0	0	0	1	0	0	0	1	0	0	0	0	0	0
AT1G17280	737.2	729.5	802.9	505.7	516.7	541.1	707.6	768.4	755	603.3	544.8	486.9	765.7	754.1	748.1	542.9	553.7	556.4
AT1G17285	6	4.8	0	17.8	7.9	13.1	8.7	5.9	5	18.1	21.8	21.7	4.1	1.9	7.5	15	15.8	24.1
AT1G17290	3266.6	3271.5	3425.6	5810.9	6065.9	5553	3065.1	3390.6	3278.2	7363.2	10297.2	6882.1	3767.8	3677.9	3574.5	6786.4	6723.3	7477.8
AT1G17300	12.1	8.7	5	14.7	6	3.8	11.6	9.9	6	6	8.9	14.4	16.2	10.4	14	10	13.9	8.8
AT1G17310	6	2.9	7	9.4	0	3.8	8.7	3.9	7	6	3	3.1	3	8.5	9.3	1	5	1.1
AT1G17330	383.2	373.9	449.2	250.7	267.8	280.4	390.7	418.7	365.5	296.1	310.6	259.9	449.3	384.6	427.2	287.9	267.4	249.1
AT1G17340	1411	1414.6	2014.7	1177.1	1100.9	1075.7	1367.8	1314.1	1678.2	1227.7	1439	1172.8	1584.2	1499.6	1782.6	1160.7	1187.6	1162.2
AT1G17345	778.4	744.9	798.9	220.3	233.1	206.3	654.3	594	692.9	212.8	375.1	277.5	570	644.7	653.9	273.9	299.1	379.7
AT1G17350	177	170.6	181.9	203.5	200.3	175.4	161.9	168.4	201.3	211.8	246.1	217.6	179.5	179.1	176.3	162	199.1	219.5
AT1G17360	1083.2	1017.6	1194.8	901.2	1028.5	1068.2	1073.1	1224.4	1047.3	964.7	1021.2	987.1	918.9	1025.5	1153	1046.8	1307.4	1055.7
AT1G17370	1212.9	1337.5	1333.5	1389	1485.7	1565.3	1223.3	1311.1	1281.7	1435.5	1502.5	1410	1214	1284.7	1374	1307.7	1460.9	1467.2
AT1G17380	527	611.9	893.3	2316.4	2703.6	2695.4	699.9	635.4	871.1	2710.4	2404.6	2278.6	683.6	603.2	853.5	2729.4	3061.5	2471.4
AT1G17390	0	0	0	0	1	0.9	0	0	0	1	0	2.1	1	0	0	0	0	3.3
AT1G17400	62.4	68.4	82.4	23.1	17.9	11.3	59.1	79.8	61.1	24.1	25.8	11.3	63.9	83.9	50.4	31	32.7	31.8
AT1G17410	96.5	99.3	102.5	88.1	99.2	91	100.8	120.2	115.1	84.3	91.3	95.9	121.7	120.6	132.5	115	108	99.9
AT1G17420	1165.6	1140	1354.6	4753.4	5254.6	5122.6	1692.5	1116.1	1359.8	6261	5326.2	4581.9	1421.9	949.2	1340.4	5294.8	6068.6	4983.4
AT1G17430	370.1	405.7	368.8	231.8	235.1	267.3	477.9	410.8	389.5	292.1	246.1	259.9	430	428.9	438.4	277.9	248.6	257.9
AT1G17440	1011.8	1054.2	1149.6	760.6	806.3	804.7	1120.6	992.9	1046.3	780	757.2	730.3	1029.4	982.2	958.9	725.8	854.8	726.5
AT1G17450	550.1	524.2	610	365.1	367	345.1	539	477.8	557.7	431.7	343.4	371.3	539.6	540.1	539.2	373.9	371.4	329.2
AT1G17455	121.7	89.6	117.6	71.3	82.3	67.5	131.8	117.2	135.2	88.3	86.3	87.7	125.8	116.9	93.3	111	84.2	93.3
AT1G17460	121.7	93.5	109.5	73.4	68.4	74.1	105.7	107.4	72.1	63.2	50.6	67	96.4	102.7	91.4	58	53.5	42.8
AT1G17470	1382.9	1363.5	1287.2	1287.2	1217.9	1253.9	1311.5	1376.1	1251.6	1285.9	1331.8	1309	1405.7	1443.1	1388	1315.7	1320.3	1339.9
AT1G17480	72.4	105	88.4	149	162.7	131.3	64.9	80.8	84.1	115.4	113.1	159.9	87.2	69.7	88.6	130	121.8	159.1
AT1G17490	134.8	103.1	105.5	101.8	114.1	109.7	114.4	132	97.1	89.3	111.1	108.3	93.3	109.3	90.5	108	84.2	118.5
AT1G17500	2059.7	2047.7	2351.4	1368	1531.3	1442.4	2204.3	1850	1884.4	1427.5	1510.4	1604	1875.3	1666.5	1744.4	1290.7	1561	1471.6
AT1G17510	133.8	139.7	121.6	118.5	107.1	108.8	119.2	121.2	143.2	107.4	104.2	117.6	150.1	121.6	99.8	142	87.2	128.4
AT1G17520	255.5	260.2	270.3	251.8	251.9	255.1	239.4	266	260.3	295.1	288.8	234.1	257.6	240.4	263.1	311.9	248.6	282
AT1G17530	343	346.9	299.4	312.6	303.5	285.1	374.2	318.2	361.5	354.4	328.5	306.4	371.2	358.2	335.8	335.9	319.9	321.5
AT1G17540	2	1.9	0	2.1	2	0.9	1.9	0	3	2	1	0	0	3.8	0.9	3	2	1.1
AT1G17550	1150.6	1146.7	1272.2	710.2	692.3	746.5	1293.1	1047.1	1062.4	756.9	729.4	637.5	1128.8	1042.5	1010.2	668.8	700.3	737.5
AT1G17560	45.3	52	39.2	133.2	114.1	107.9	51.4	46.3	59.1	84.3	80.4	133.1	37.5	32	49.4	98	105	139.4
AT1G17580	943.4	951.1	1048.1	920	944.2	937.9	918	828.4	979.3	893.4	1034.1	914.9	865.1	937.9	958	869.8	898.4	841.7
AT1G17590	128.7	127.2	135.7	104.9	113.1	87.2	100.8	112.3	140.2	113.4	114.1	97	145	123.5	130.6	123	135.7	104.3
AT1G17600	26.1	14.5	13.1	30.4	24.8	33.8	23.3	9.9	10	34.1	29.8	34	21.3	11.3	10.3	35	41.6	49.4
AT1G17610	1	1	1	9.4	4	6.6	0	0	1	10	6	5.2	2	2.8	0	7	5.9	5.5
AT1G17615	0	0	0	0	0	0	0	0	0	1	0	2.1	0	0	0	0	0	0
AT1G17620	6876.2	8321.8	8941.3	6637.5	6639.1	6852	6220.4	6985.1	8295.7	6253	7065.9	6286.9	6072.1	6387.8	7394.4	6148.6	7733.6	7088.2
AT1G17630	39.2	32.8	34.2	60.8	64.5	53.5	25.2	43.3	34	56.2	60.5	53.6	40.6	24.5	32.6	61	57.4	73.5
AT1G17640	104.6	108.9	132.6	68.2	65.5	53.5	122.1	92.6	91.1	81.3	48.6	59.8	113.6	125.4	113.8	75	61.4	69.1
AT1G17650	113.6	114.7	66.3	222.4	286.6	248.5	92.1	106.4	102.1	259	279.9	206.3	119.7	89.5	111	289.9	303.1	249.1
AT1G17665	74.4	115.6	140.7	156.3	166.6	144.4	78.5	93.6	106.1	201.8	217.3	169.2	85.2	121.6	140.9	185	180.3	163.5
AT1G17680	555.2	508.8	487.4	419.6	425.5	465.2	537	563.5	472.6	474.8	453.5	431.2	546.7	589.1	555	469.9	438.8	401.7
AT1G17690	391.2	361.4	417	508.8	555.4	485.8	379	359.5	475.6	410.6	518	541.5	331.6	375.1	370.3	422.9	406.1	381.9
AT1G17700	215.2	159	142.7	111.2	40.7	36.6	179.3	165.5	190.2	44.2	29.8	53.6	161.3	184.7	126.9	84	15.8	16.5
AT1G17710	28.2	16.4	13.1	4.2	5	7.5	33.9	15.8	12	12	11.9	7.2	33.5	19.8	22.4	13	8.9	13.2
AT1G17720	1578	1623.7	1745.4	1721.5	1652.3	1619.7	1530.6	1712	1676.2	1671.4	1687.1	1583.3	1578.1	1635.3	1702.4	1568.6	1660	1596.7
AT1G17730	752.3	751.6	815.9	555	600	602.1	779.4	756.5	739	592.3	608.3	628.2	803.3	721.1	839.5	651.9	676.5	688.1
AT1G17744	0	0	0	3.1	2	0.9	0	1	0	2	0	1	1	0	0.9	0	2	1.1
AT1G17745	1530.7	1931.1	1564.6	1811.8	2020.3	1788.5	1687.7	1803.7	1708.2	1615.2	1882.6	2196	2139	1930.4	1833	1413.7	2343.4	2693.1
AT1G17750	646.7	763.2	762.7	777.4	925.4	805.6	881.2	651.1	757	1048	828.7	896.4	892.5	672	948.7	876.8	1060.8	985.5
AT1G17760	384.2	336.3	432.1	373.5	391.8	374.2	379	405.8	433.6	422.6	447.6	400.2	425	394	395.5	410.9	407.1	437.9
AT1G17780	291.7	313.2	359.7	145.8	126	160.4	308.3	329	301.4	161.6	159.8	145.4	331.6	336.5	311.6	210	134.7	132.8
AT1G17790	158.9	159	203	163.7	172.6	141.6	177.4	188.1	171.2	165.6	182.6	164	173.4	194.2	176.3	159	153.5	144.9
AT1G17810	95.5	60.7	20.1	19.9	0	16.9	48.5	38.4	41.1	15.1	0	7.2	57.8	55.6	39.2	5	12.9	15.4
AT1G17820	292.7	276.6	323.6	196.2	222.2	213.8	307.3	310.3	300.4	180.7	212.4	210.4	303.2	269.6	255.6	215	225.8	174.5
AT1G17830	228.3	220.7	249.2	78.7	87.3	107.9	180.3	225.6	213.3	95.4	137	75.3	186.6	193.2	209.9	108	115.9	85.6
AT1G17840	3625.6	3870.8	3732.1	1099.4	1091	1122.6	3473.2	4962.8	3750.8	1200.6	930.9	1073.8	4132.9	3914.5	3614.6	1348.7	1250	1195.1
AT1G17850	46.3	55.9	33.2	174.1	126	121.9	57.2	53.2	54.1	156.6	147.9	125.8	53.8	48.1	50.4	167	118.9	90
AT1G17860	3596.5	3483.5	3278.9	1009.2	871.8	892.8	4219.6	3310.8	2724.5	906.5	788	968.6	3513.2	3141.6	3239.6	929.8	819.1	811
AT1G17870	103.6	135.9	100.5	72.4	115	89.1	90.2	127.1	92.1	84.3	87.3	65	91.3	109.3	93.3	56	64.4	50.5
AT1G17880	1679.6	1768.2	1491.2	2520.9	2744.3	2615.7	1579.1	1650	1756.3	2244.6	2390.7	2633.4	1557.8	1579.7	1685.6	2262.5	2388	2551.5
AT1G17890	725.1	684.2	648.1	658.8	666.5	639.6	730.9	658	659.8	667.6	665.9	754	695.8	635.3	608.2	637.9	691.3	642
AT1G17920	53.3	58.8	42.2	31.5	25.8	27.2	47.5	56.1	57.1	17.1	19.8	20.6	46.7	52.8	48.5	43	31.7	24.1
AT1G17930	110.6	101.2	139.7	150	163.6	144.4	125	135	131.2	163.6	118.1	180.5	125.8	140.4	149.2	148	116.9	146
AT1G17940	424.4	614.8	554.7	126.9	130.9	127.5	371.3	869.8	557.7	172.7	120.1	134.1	644	722	664.2	161	212	178.9
AT1G17950	6	3.9	17.1	15.7	10.9	12.2	8.7	9.9	23	23.1	13.9	14.4	13.2	17.9	16.8	12	15.8	9.9
AT1G17960	232.3	234.2	267.3	12.6	20.8	17.8	284	217.7	228.3	20.1	9.9	27.9	269.8	285.6	261.2	22	11.9	14.3
AT1G17970	235.3	234.2	245.2	190.9	145.8	144.4	303.4	321.1	248.3	297.1	194.5	205.3	381.3	339.3	350.7	295.9	235.7	199.7
AT1G17980	1211.9	1447.3	1714.3	2144.3	2338.7	2241.5	1140.9	1470.7	1742.2	2124.1	2448.3	1882.5	1221.1	1454.4	1545.7	1748.6	2081	1950.1
AT1G17990	4	3.9	3	22	19.8	32.8	0	1	10	16.1	20.8	9.3	1	3.8	0	10	11.9	14.3
AT1G18000	1	1	0	6.3	6.9	7.5	1	2	0	5	2	4.1	0	0.9	2.8	3	5	2.2
AT1G18010	2	0	1	9.4	6.9	4.7	1	1	2	5	4	4.1	1	0.9	0.9	2	4	3.3
AT1G18020	3	1.9	4	19.9	26.8	20.6	0	3	2	19.1	18.9	2.1	1	0	1.9	9	12.9	15.4
AT1G18030	241.4	280.4	224.1	501.5	568.3	501.8	252	272.9	264.3	497.9	490.2	352.8	206.9	184.7	248.1	427.9	395.2	368.7
AT1G18040	155.9	190.8	173.8	240.2	244	224.1	166.7	182.2	174.2	197.8	206.4	222.8	209.9	161.2	167	232.9	236.7	215.1
AT1G18050	0	0	0	0	0	0	0	0	0	3	1	0	1	0	0	0	0	2.2
AT1G18060	57.3	36.6	36.2	698.7	759.7	834.7	64.9	55.2	55.1	902.5	732.4	645.7	57.8	71.6	57.8	815.8	802.3	801.1
AT1G18070	2475.1	2536.2	2813.6	2776.9	3153.9	3233.7	2503.9	2726.7	2617.4	3024.6	2994.1	2993.4	2451.4	2584.5	2582	2897.3	2948.6	2987.2
AT1G18075	16.1	12.5	8	7.3	13.9	25.3	12.6	13.8	12	33.1	15.9	24.8	31.4	21.7	19.6	19	17.8	24.1
AT1G18080	3802.7	4129.1	3411.5	5824.5	6497.3	6511.5	3782.5	3974.7	4030.2	5487	5692.4	6540.7	3434.1	3741	3637	5730.7	5665.5	6395.7
AT1G18090	35.2	53	37.2	45.1	47.6	40.3	32	51.2	42.1	30.1	46.6	34	46.7	47.1	45.7	51	31.7	27.4
AT1G18100	227.3	276.6	209	17.8	11.9	19.7	311.2	244.3	202.3	16.1	20.8	30.9	225.2	238.5	222.9	22	24.8	26.3
AT1G18120	0	0	1	1	0	0	1.9	1	2	0	0	0	1	0.9	0.9	0	0	0
AT1G18140	275.6	381.6	228.1	74.5	97.2	66.6	398.4	373.3	284.4	98.4	127	106.2	472.6	430.8	339.5	126	140.6	153.6
AT1G18150	1428.1	1347.1	1339.5	897	784.5	755	1456	1479.6	1273.6	933.6	796.9	843.8	1619.7	1315.8	1234.1	919.8	864.7	808.8
AT1G18160	1370.8	1259.4	1455	966.2	1091	976.3	1423	1353.5	1333.7	1093.2	1200.8	1026.3	1413.8	1349.8	1372.2	994.8	1063.8	974.5
AT1G18170	168	152.3	127.6	295.8	272.7	282.3	138.6	173.4	139.2	270	274.9	264.1	142	146.1	152	309.9	269.4	272.2
AT1G18180	41.2	35.7	24.1	52.5	60.5	69.4	26.2	20.7	32	64.2	71.5	69.1	26.4	35.8	29.8	70	65.4	63.6
AT1G18190	408.3	401.8	537.6	470	571.3	560.8	405.2	430.5	486.6	522	606.4	543.6	464.5	522.2	489.7	505.9	543.8	500.4
AT1G18191	7	4.8	11.1	0	1	0.9	5.8	0	4	2	5	2.1	6.1	0.9	1.9	1	0	1.1
AT1G18200	597.4	566.6	849.1	208.8	219.2	246.7	550.6	473.8	630.8	240.9	224.3	191.9	651.1	610.8	639.9	216	187.2	180
AT1G18210	2557.6	2719.3	3281.9	3704.3	4138.8	4249.4	3005	2625.2	3024.9	4050.5	4531.3	4014.5	2991.9	2726.8	3053.1	3661.2	4511.6	4743
AT1G18220	0	1	2	0	0	0	1.9	2	3	1	0	0	2	0	1.9	1	1	0
AT1G18250	181	230.3	186.9	749	860.9	911.6	182.2	211.8	243.3	536.1	602.4	949	166.3	228.1	208.9	644.9	673.5	884.5
AT1G18260	1335.6	1240.2	1283.2	1070.1	1018.6	1057.9	1286.3	1328.9	1322.7	1078.1	1140.3	1169.7	1376.3	1357.3	1284.5	1094.7	1103.4	1162.2
AT1G18265	11.1	2.9	8	51.4	50.6	58.1	3.9	1	5	52.2	44.7	54.7	3	9.4	5.6	69	61.4	38.4
AT1G18270	2858.3	2579.6	2997.5	1400.5	1658.3	1633.7	3290	2471.5	2613.4	2289.8	2062.2	1974.3	3124.8	3118	3175.3	1909.6	1779.9	1741.6
AT1G18280	49.3	36.6	38.2	10.5	0	8.4	46.5	39.4	51.1	14.1	9.9	8.3	58.8	64.1	66.2	12	13.9	17.6
AT1G18290	274.6	361.4	379.8	70.3	54.5	89.1	245.2	275.8	326.4	104.4	119.1	70.1	303.2	384.6	347.9	90	105	147.1
AT1G18300	3035.3	3810.1	3786.3	4201.6	3667.7	4506.4	3211.5	3085.2	3058.9	4119.8	3204.5	3924.8	3455.4	3347	3408.5	4075.1	3869.7	3647.8
AT1G18310	1	6.7	2	0	1	5.6	6.8	3	4	6	3	2.1	1	8.5	3.7	0	2	3.3
AT1G18320	9.1	18.3	12.1	37.8	48.6	37.5	9.7	18.7	28	22.1	31.8	37.1	17.2	17.9	19.6	34	14.9	28.5
AT1G18330	397.3	302.6	262.3	122.7	138.9	144.4	374.2	492.5	449.6	149.6	147.9	117.6	457.4	557.1	555	292.9	182.2	139.4
AT1G18335	98.6	80.9	90.4	79.7	65.5	69.4	102.8	101.5	93.1	67.3	65.5	70.1	82.2	101.8	88.6	104	81.2	59.3
AT1G18340	105.6	101.2	92.4	137.4	117	102.2	133.8	116.2	121.2	119.5	125	104.2	143	116.9	136.2	117	100	105.4
AT1G18350	5	9.6	4	8.4	9.9	16.9	9.7	4.9	2	24.1	21.8	16.5	4.1	14.1	3.7	27	33.7	41.7
AT1G18360	198.1	263.1	187.9	118.5	117	86.3	219.1	250.2	178.2	98.4	88.3	90.8	155.2	215.8	185.6	119	107	98.8
AT1G18370	302.7	319	343.7	393.4	514.7	459.5	281.1	278.8	308.4	265	246.1	503.4	309.3	280.9	294.8	320.9	329.8	401.7
AT1G18382	2	0	5	0	2	0.9	2.9	1	1	0	0	0	5.1	0.9	0.9	0	0	0
AT1G18390	608.5	529	681.3	518.2	491.9	478.3	773.6	634.4	551.7	675.6	526	521.9	797.2	537.3	631.5	503.9	494.2	452.1
AT1G18400	1840.5	2048.6	2145.4	1816	1749.5	1861.6	1376.5	1728.8	1715.2	1213.7	1577.9	1297.6	404.7	548.6	612.9	939.8	928.1	952.6
AT1G18410	5	5.8	1	15.7	9.9	18.8	1	0	2	9	6.9	17.5	0	1.9	2.8	9	5.9	13.2
AT1G18415	1	1.9	0	0	3	0	0	0	0	0	0	1	0	0	0	0	0	1.1
AT1G18440	104.6	97.3	108.5	203.5	198.4	185.7	117.3	130	147.2	192.7	224.3	192.9	118.7	111.2	138.1	180	159.5	186.6
AT1G18450	564.2	519.4	564.7	674.6	703.2	672.4	538	539.8	591.8	612.3	681.8	714.8	584.2	626.8	574.6	607.9	673.5	663.9
AT1G18460	701	572.4	648.1	746.9	827.2	1065.4	774.5	563.5	548.7	763.9	716.5	729.3	478.7	525	469.2	667.8	581.4	669.4
AT1G18470	1169.7	1161.2	1258.1	818.3	871.8	832.8	1266	1184.1	1287.7	1333.1	1243.5	1034.6	1749.5	1480.8	1577.4	1208.7	1258.9	1230.2
AT1G18480	436.5	414.4	435.1	636.8	663.5	620.9	393.6	394	343.4	572.2	615.3	605.5	341.8	341.2	375.9	488.9	534.9	563
AT1G18485	61.3	42.4	20.1	223.5	260.8	210.1	36.8	52.2	63.1	240.9	285.8	185.7	32.5	50.9	40.1	247.9	222.9	255.7
AT1G18490	146.8	150.3	118.6	223.5	192.4	166.9	120.2	147.8	132.2	176.7	137.9	159.9	131.8	129.1	127.8	163	159.5	149.2
AT1G18500	1287.3	1267.2	1299.3	2019.5	2207.7	2143	1254.4	1175.2	1294.7	2460.4	2688.4	2156.8	1367.2	1283.8	1358.2	1985.5	2292.9	2298
AT1G18510	0	3.9	1	1	2	0	1.9	0	0	1	0	0	0	0	0	1	0	2.2
AT1G18520	0	1	0	0	0	0	0	0	0	0	0	0	0	0	0.9	0	0	0
AT1G18530	0	0	0	0	1	0.9	0	0	1	0	2	1	0	0	0	0	0	0
AT1G18540	2659.1	2934.2	2253.9	4952.7	5451.9	5410.5	2469.9	2600.6	2723.5	4337.6	4667.3	5357.5	2359.1	2466.7	2496.2	4427	4667.1	5362
AT1G18550	196.1	182.1	184.9	112.3	139.8	123.8	191	206.9	156.2	96.4	75.4	146.5	170.4	173.4	151.1	131	112.9	108.6
AT1G18560	76.4	93.5	99.5	107	127	102.2	119.2	94.6	117.2	95.4	125	128.9	91.3	104.6	94.2	119	95.1	116.3
AT1G18570	2672.2	2559.4	3248.7	2027.9	2171.1	2173.9	3805.7	2867.5	2674.4	2605	2174.4	2729.3	5227.3	3719.4	3727.5	2502.4	2732.7	3071.7
AT1G18580	633.6	613.8	591.9	535	529.6	604.9	636.9	609.8	583.8	583.2	452.5	574.5	579.1	541	579.3	521.9	554.7	591.5
AT1G18590	352	580.1	520.5	1187.6	1226.9	1200.5	525.4	513.2	494.6	1589.1	1335.8	1244	426	483.5	494.4	1505.7	1684.8	1529.8
AT1G18600	233.3	210.1	208	271.7	278.7	245.7	248.2	226.6	224.3	266	293.8	303.3	221.1	237.5	235.1	272.9	258.5	284.2
AT1G18610	239.4	206.2	252.2	244.4	228.1	198.8	179.3	207.8	185.2	161.6	160.8	188.8	152.1	161.2	155.8	174	125.8	148.2
AT1G18620	521	516.5	513.5	649.4	606	534.6	405.2	544.7	483.6	462.8	443.6	502.3	444.2	429.8	453.3	523.9	374.4	374.2
AT1G18630	89.5	138.8	106.5	196.2	185.5	198.8	115.4	158.6	113.1	188.7	176.6	167.1	115.6	132	114.7	182	165.4	216.2
AT1G18640	295.7	262.1	247.2	432.2	422.5	353.6	281.1	303.4	258.3	414.6	432.7	435.3	269.8	258.3	233.2	397.9	391.2	386.3
AT1G18650	157.9	122.4	76.4	149	153.7	156.6	159	131	133.2	132.5	130	139.3	153.1	148.9	101.7	137	132.7	129.5
AT1G18660	609.5	599.4	689.3	877	894.6	914.4	586.5	658	652.8	981.8	837.6	757.1	574	651.3	605.4	963.8	903.3	868.1
AT1G18670	472.7	430.7	435.1	753.2	782.5	710.9	509.9	413.7	365.5	488.9	500.2	682.8	292.1	266.7	262.1	434.9	547.7	515.8
AT1G18680	69.4	39.5	36.2	69.2	62.5	62.8	53.3	39.4	43.1	57.2	72.4	64	51.7	52.8	46.6	95	60.4	91.1
AT1G18690	158.9	174.4	167.8	165.8	153.7	127.5	174.5	182.2	158.2	146.6	177.6	150.6	143	151.8	144.6	144	157.5	133.9
AT1G18700	660.8	648.5	655.2	697.6	712.1	705.3	591.3	691.5	678.9	722.8	762.2	689	654.2	693.7	702.4	673.8	747.8	661.7
AT1G18710	44.3	80	95.5	187.8	234.1	202.6	59.1	85.7	79.1	151.6	260	105.2	40.6	76.3	63.4	133	242.7	147.1
AT1G18720	1869.6	2097.8	1995.7	1586.2	1490.7	1522.1	2102.5	1914	2010.6	1630.3	1623.6	1598.8	2171.4	2076.5	1985	1586.6	1720.4	1692.2
AT1G18730	29.2	15.4	4	296.9	308.5	319.8	24.2	31.5	25	323.2	302.7	226.9	27.4	31.1	22.4	329.9	360.5	299.6
AT1G18740	5119.1	5811.6	5772.9	4247.7	4020.8	4703.3	5447.8	4961.8	5564.2	4472.1	4101.6	4284.8	5679.6	5010.7	5907.5	4332	4630.4	4215.2
AT1G18745	66.4	53	70.3	67.1	94.2	79.7	69.8	56.1	54.1	38.1	65.5	77.4	35.5	47.1	52.2	54	63.4	56
AT1G18750	58.3	59.7	104.5	80.8	58.5	59.1	64.9	79.8	73.1	73.3	82.4	64	54.8	56.6	70.9	55	83.2	66.9
AT1G18773	18.1	26	22.1	6.3	7.9	7.5	25.2	27.6	26	17.1	15.9	12.4	34.5	41.5	38.2	12	6.9	11
AT1G18790	0	0	0	0	0	0	0	0	0	0	0	0	2	0	1.9	0	0	0
AT1G18800	387.2	472.2	481.3	648.3	716.1	666.8	433.3	455.1	483.6	430.7	613.3	646.7	389.5	449.6	484.1	481.9	592.3	684.8
AT1G18810	9.1	6.7	4	44.1	35.7	57.2	17.4	11.8	8	72.3	39.7	41.3	22.3	11.3	6.5	69	35.7	48.3
AT1G18830	78.4	62.6	89.4	7.3	4	3.8	88.2	94.6	52.1	3	1	1	66.9	79.2	97	3	1	5.5
AT1G18835	316.8	246.7	283.4	48.3	15.9	28.1	398.4	213.8	145.2	18.1	9.9	11.3	70	39.6	53.2	20	2	5.5
AT1G18840	644.7	636.9	560.7	619	655.6	640.6	697	739.8	621.8	516	477.3	724.1	681.6	680.5	611	639.9	680.4	605.8
AT1G18850	128.7	186.9	146.7	296.9	275.7	219.5	151.2	154.7	142.2	185.7	306.7	228	91.3	126.3	112.9	186	160.5	196.4
AT1G18860	65.4	63.6	52.3	29.4	19.8	21.6	66.9	53.2	45.1	32.1	29.8	25.8	40.6	61.3	66.2	30	16.8	13.2
AT1G18870	349	608	583.8	128	127	120	231.7	641.3	412.5	84.3	86.3	113.5	299.2	426	390.8	90	161.4	88.9
AT1G18880	625.6	590.7	528.6	685	610	695	937.4	677.7	701.9	1001.8	589.5	835.5	1165.3	902	944	1115.7	986.5	992.1
AT1G18890	1758	1735.5	2123.3	1274.6	1380.6	1283	1901.9	1964.2	1949.5	1488.7	1470.7	1209.9	2024.4	1901.2	1800.3	1211.7	1434.2	1415.7
AT1G18900	372.1	376.8	381.8	660.9	648.6	705.3	356.7	319.2	351.5	630.4	671.9	694.2	340.8	293.1	336.7	524.9	605.2	603.6
AT1G18910	790.5	787.3	929.5	420.7	381.8	396.7	814.3	766.4	851.1	407.6	432.7	398.2	814.4	821	826.5	399.9	316.9	349
AT1G18940	68.4	50.1	68.3	39.9	43.6	36.6	67.9	74.9	50.1	42.2	39.7	35.1	62.9	50	70.9	38	35.7	31.8
AT1G18950	519	460.6	543.6	614.8	619.9	655.6	571	553.6	553.7	584.2	633.2	630.2	508.1	526.9	581.1	595.9	623	635.4
AT1G18960	9.1	7.7	11.1	5.2	3	0.9	1	8.9	7	5	3	3.1	5.1	5.7	2.8	1	1	1.1
AT1G18970	65.4	49.1	31.2	10.5	10.9	15	51.4	34.5	43.1	4	6	17.5	38.5	41.5	69	8	13.9	12.1
AT1G18980	349	334.4	263.3	165.8	126	161.3	297.6	292.6	245.3	151.6	90.3	193.9	271.8	246	285.4	113	119.8	129.5
AT1G18990	6	5.8	8	10.5	6.9	3.8	9.7	3.9	5	26.1	6	1	8.1	12.3	4.7	10	7.9	12.1
AT1G19000	2659.1	2637.4	2565.4	2412.9	2104.6	2213.3	2977.9	2860.6	2744.5	3008.5	2320.2	2454.9	3404.7	3347	3055.9	3151.3	2891.2	2736.9
AT1G19010	103.6	79	83.4	108.1	107.1	123.8	94	116.2	69.1	112.4	103.2	105.2	129.8	103.7	89.5	125	112.9	125.1
AT1G19020	2312.2	2623.9	3314	1474	1478.8	1540.9	2986.6	2607.5	2473.2	2187.4	1863.7	1517.3	3411.8	2606.2	3151	1719.6	1683.8	1773.4
AT1G19025	108.6	131.1	117.6	57.7	72.4	70.3	87.2	109.3	121.2	77.3	63.5	61.9	102.4	125.4	152	63	85.2	65.8
AT1G19030	2	0	1	0	0	0	1	2	1	4	2	0	0	2.8	0.9	1	2	2.2
AT1G19040	7	5.8	6	0	1	0	2.9	1	2	4	1	2.1	2	0.9	3.7	1	3	1.1
AT1G19050	396.3	610.9	698.4	193	201.3	239.2	292.7	615.7	542.7	388.5	576.6	338.3	213	213	195.9	596.9	416	397.3
AT1G19070	0	1	4	0	3	2.8	1	3	4	1	1	0	2	3.8	0.9	4	2	2.2
AT1G19080	86.5	99.3	81.4	70.3	84.3	98.5	91.1	88.7	74.1	73.3	87.3	88.7	70	66.9	80.2	91	67.4	80.1
AT1G19100	181	180.2	203	162.6	168.6	154.7	182.2	181.3	201.3	145.6	148.9	127.9	193.7	179.1	187.5	169	135.7	144.9
AT1G19110	2212.6	2156.6	2575.5	856	748.8	819.7	2000.8	2364.2	2203.8	836.2	914	845.8	2212	2189.6	2139.9	880.8	833	827.4
AT1G19115	1	7.7	0	5.2	4	1.9	2.9	0	2	3	3	6.2	1	0	0.9	3	2	3.3
AT1G19120	303.7	292	267.3	295.8	290.6	270.1	317	285.7	345.4	291.1	290.8	261	308.3	255.4	284.5	305.9	274.4	250.2
AT1G19130	634.6	645.6	633.1	588.5	679.4	582.4	633	595	573.7	670.6	753.2	631.3	580.1	563.7	624	660.8	688.4	783.6
AT1G19140	151.9	165.7	147.7	374.5	381.8	447.4	146.4	157.6	162.2	447.7	363.2	379.6	168.4	151.8	193.1	400.9	397.2	435.7
AT1G19150	126.7	54.9	38.2	310.5	258.9	288.9	79.5	86.7	99.1	219.8	242.1	161.9	86.2	100.9	78.4	306.9	243.7	214
AT1G19160	2	0	0	1	1	0.9	1	0	2	0	1	0	1	0	0	0	0	0
AT1G19170	336.9	333.4	327.6	251.8	318.4	291.7	323.8	376.3	319.4	313.2	314.6	284.7	385.4	392.1	360.1	293.9	292.2	360
AT1G19180	15121.1	16659.9	19149.7	9966.3	11230.2	11510.3	17327.4	14899.1	15131.5	11628.6	10628.7	9339.1	16415	13757.7	16229.9	9503.8	11815.3	10773.3
AT1G19190	37.2	45.3	57.3	33.6	29.8	42.2	52.3	56.1	45.1	62.2	38.7	51.6	49.7	54.7	45.7	26	25.8	48.3
AT1G19200	58.3	58.8	65.3	24.1	25.8	23.4	47.5	61.1	59.1	62.2	16.9	23.7	59.8	49	57.8	28	31.7	26.3
AT1G19210	355	384.5	286.4	196.2	163.6	177.3	307.3	336.9	339.4	213.8	108.2	204.2	377.3	364.8	427.2	188	143.6	128.4
AT1G19220	1526.7	1506.1	1769.6	1591.5	1346.9	1495.9	1528.7	1211.6	1195.5	1124.3	1123.4	1215.1	846.9	856.8	900.2	985.8	878.5	820.9
AT1G19230	476.7	487.6	446.2	272.8	255.9	297.3	462.4	373.3	357.5	244.9	214.4	294	199.8	187.6	191.2	167	185.2	209.6
AT1G19240	148.8	152.3	124.6	124.8	127.9	129.4	145.4	152.7	147.2	150.6	146.9	145.4	141	96.1	137.1	120	142.6	164.6
AT1G19250	38.2	18.3	16.1	5.2	2	0	18.4	6.9	18	2	4	5.2	19.3	15.1	36.4	4	4	9.9
AT1G19270	464.6	454.8	494.4	471	461.2	461.4	544.8	511.3	443.6	595.3	482.3	514.7	575.1	467.5	478.5	552.9	501.2	429.1
AT1G19290	99.6	107.9	84.4	135.3	138.9	155.7	100.8	113.3	88.1	157.6	132	150.6	93.3	112.2	119.4	130	182.2	146
AT1G19300	613.5	521.3	693.4	807.8	807.3	788.7	581.6	597	611.8	914.5	762.2	824.2	626.8	570.3	617.5	750.8	834	818.7
AT1G19310	255.5	235.1	194.9	314.7	247	200.7	276.3	214.7	243.3	327.3	309.6	241.4	286	238.5	246.3	294.9	252.6	263.4
AT1G19320	0	1	1	5.2	5	0.9	1	0	2	3	2	0	0	0.9	0.9	0	3	4.4
AT1G19330	246.4	239	276.3	204.6	166.6	167.9	345.1	274.8	234.3	193.7	161.8	201.1	365.1	306.3	289.2	248.9	209	198.6
AT1G19340	53.3	52	36.2	43	45.6	43.1	60.1	44.3	37	42.2	32.7	56.7	79.1	66.9	70.9	51	57.4	32.9
AT1G19350	2593.8	3161.6	3228.6	3144.1	3459.4	3765.5	3491.6	3542.3	3594.6	3742.3	3238.2	3852.6	5170.5	4977.7	4522.3	4073.1	4064.9	3932
AT1G19360	1125.4	1060.9	1025	1150.8	1080.1	1117.9	1194.3	971.3	1061.4	1183.5	1226.6	1246	1099.4	988.8	1033.6	1076.8	1202.4	1350.9
AT1G19370	530	531	537.6	529.8	499.9	421.1	565.1	535.9	546.7	553.1	495.2	534.3	490.9	487.3	582.1	519.9	511.1	520.2
AT1G19371	1	1.9	2	0	2	0	2.9	0	1	0	1	0	0	0.9	0	1	0	0
AT1G19373	2	1.9	2	2.1	1	0.9	1.9	3.9	1	2	0	1	2	1.9	1.9	3	2	4.4
AT1G19376	2	2.9	1	3.1	2	3.8	0	1	0	2	1	2.1	2	4.7	0	3	3	2.2
AT1G19380	2200.5	2246.2	2744.3	2042.6	2446.8	2264.9	3020.5	2265.7	2631.4	2607	2909.7	2400.3	2967.6	2478	2604.4	2258.5	2821.8	2847.8
AT1G19390	4	7.7	7	1	0	0	3.9	5.9	4	1	0	0	0	3.8	5.6	0	0	0
AT1G19394	15.1	19.3	28.1	10.5	9.9	13.1	13.6	20.7	17	13.1	9.9	11.3	16.2	19.8	17.7	7	7.9	3.3
AT1G19396	9.1	15.4	25.1	9.4	8.9	12.2	10.7	8.9	11	5	10.9	3.1	14.2	13.2	17.7	9	14.9	9.9
AT1G19397	62.4	52	62.3	25.2	23.8	22.5	53.3	33.5	53.1	41.2	38.7	26.8	49.7	53.7	63.4	25	38.6	25.2
AT1G19400	811.6	831.6	921.5	235	159.7	183.8	833.7	800.9	888.1	382.5	264	199.1	953.4	924.7	939.3	295.9	227.8	222.8
AT1G19410	2	2.9	1	4.2	3	5.6	4.8	3	3	6	2	1	2	2.8	2.8	2	0	7.7
AT1G19415	7	4.8	1	1	3	0	3.9	4.9	7	2	2	1	7.1	2.8	4.7	4	4	1.1
AT1G19420	11.1	17.3	16.1	11.5	6.9	8.4	16.5	19.7	12	18.1	17.9	23.7	25.4	13.2	15.9	14	11.9	5.5
AT1G19430	678.9	641.8	719.5	679.8	617.9	668.7	689.2	691.5	706.9	642.5	549.8	623	669.4	678.6	681.9	670.8	586.4	610.2
AT1G19440	708	647.5	552.7	378.7	389.8	457.7	667.9	576.3	586.8	410.6	350.3	452.8	513.2	554.2	525.2	381.9	367.5	475.2
AT1G19450	3202.2	4520.3	7258.1	536.1	508.8	550.5	2512.6	5185.4	6348.2	855.3	711.6	608.6	7061	6154	7287.1	734.8	658.7	651.9
AT1G19460	0	2.9	2	0	0	0	0	0	2	0	0	0	4.1	2.8	1.9	0	1	0
AT1G19464	0	1	2	2.1	5	4.7	0	0	1	3	2	5.2	0	5.7	1.9	3	2	3.3
AT1G19470	0	0	0	0	2	0.9	0	0	0	0	0	0	0	0.9	0	0	0	0
AT1G19480	147.8	151.3	130.6	112.3	90.3	90	150.3	155.6	176.2	107.4	110.2	86.6	136.9	179.1	141.8	108	102	103.2
AT1G19485	398.3	399.9	477.3	247.6	311.4	258.8	396.5	404.9	434.6	324.2	284.8	252.7	391.5	449.6	442.2	297.9	249.6	232.7
AT1G19490	64.4	73.2	61.3	28.3	30.7	28.1	47.5	55.2	54.1	24.1	23.8	39.2	55.8	68.8	77.4	24	27.7	21.9
AT1G19500	0	1	1	0	0	0	1	1	0	0	0	3.1	0	0	0	0	0	0
AT1G19510	13.1	16.4	6	0	0	0	27.1	20.7	25	0	1	0	26.4	21.7	19.6	0	0	0
AT1G19520	410.3	473.1	421	730.2	748.8	703.4	409.1	440.3	443.6	607.3	691.7	735.4	410.8	408.1	434.7	669.8	682.4	700.1
AT1G19530	4419.2	4106	3952.1	427	377.9	316.1	6051.7	3330.5	3982.1	594.3	1327.8	492	5217.1	4631.8	5034.4	439.9	493.3	426.9
AT1G19540	570.2	682.2	742.6	614.8	592.1	507.4	729	786.1	705.9	683.6	1228.6	562.2	669.4	644.7	677.2	554.9	512.1	490.5
AT1G19550	19.1	8.7	17.1	37.8	68.4	58.1	7.8	5.9	13	74.3	87.3	65	13.2	13.2	11.2	41	24.8	49.4
AT1G19560	16.1	16.4	20.1	5.2	6.9	9.4	13.6	26.6	11	15.1	10.9	11.3	15.2	15.1	13.1	11	10.9	19.8
AT1G19570	7221.1	10091	9967.2	10820.2	11805.4	11801	7097.7	9660.6	9210.9	11786.2	11163.6	12450	8891.6	8991.1	8968	11167.4	13105.8	14307
AT1G19580	501.9	528.1	513.5	587.5	604	603	462.4	452.1	551.7	568.2	633.2	618.9	418.9	500.5	479.5	586.9	597.3	629.9
AT1G19600	1140.5	1141.9	1028	1561	1404.4	1489.3	1154.5	966.4	1019.3	1649.3	1373.5	1725.7	1020.3	1066	1100.7	1673.6	1378.7	1561.6
AT1G19610	19.1	2.9	1	10.5	13.9	11.3	3.9	10.8	4	20.1	13.9	10.3	6.1	11.3	1.9	24	24.8	16.5
AT1G19620	1	1.9	2	2.1	0	0	1.9	2	5	5	3	1	4.1	3.8	2.8	5	0	0
AT1G19630	4	1.9	0	40.9	21.8	24.4	1	2	0	9	9.9	25.8	0	5.7	1.9	8	17.8	5.5
AT1G19640	0	0	0	12.6	21.8	29.1	0	0	0	25.1	37.7	18.6	0	0	0	8	22.8	29.6
AT1G19650	183	182.1	235.1	208.8	190.4	209.1	149.3	202.9	184.2	236.9	189.5	207.3	193.7	172.5	199.6	221.9	201.1	175.6
AT1G19660	807.6	681.3	729.5	1973.3	1522.4	1807.2	865.6	730.9	700.9	2480.5	1963	1643.2	864.1	848.3	872.2	2444.4	1999.7	1773.4
AT1G19670	62.4	48.2	71.3	992.4	1651.3	1620.6	89.2	81.8	110.1	1400.4	1622.6	1241.9	57.8	90.5	76.5	1111.7	1512.4	1623.1
AT1G19680	424.4	412.4	357.7	351.4	353.1	347.9	464.3	461	421.5	440.7	427.7	364.1	467.6	492	490.7	369.9	341.7	390.7
AT1G19690	62.4	80.9	79.4	128	101.2	83.5	91.1	99.5	99.1	87.3	106.2	110.4	80.1	82	102.6	120	92.1	105.4
AT1G19700	392.2	336.3	441.1	266.5	217.2	244.8	407.1	434.4	390.5	308.2	245.1	292.9	601.4	533.5	487.9	354.9	287.2	301.8
AT1G19710	287.6	319	321.6	275.9	287.6	283.2	335.4	328	339.4	274.1	303.7	280.6	324.5	296.9	302.2	275.9	252.6	283.1
AT1G19715	256.5	189.8	150.7	979.8	957.1	1019.4	173.5	240.4	221.3	855.3	820.7	840.7	165.3	220.6	200.6	1163.7	1042	862.6
AT1G19720	251.4	180.2	153.7	499.4	533.6	574.9	176.4	240.4	239.3	614.4	524	466.2	216	255.4	207.1	604.9	476.4	404.9
AT1G19730	78.4	72.3	66.3	170	148.8	144.4	65.9	62.1	56.1	142.5	159.8	168.1	64.9	61.3	62.5	163	164.4	174.5
AT1G19740	269.5	266	247.2	772.1	709.1	653.7	323.8	289.6	292.4	816.1	669.9	721	282	263.9	232.3	915.8	708.2	797.8
AT1G19750	21.1	25.1	26.1	32.5	35.7	29.1	21.3	18.7	18	46.2	44.7	33	27.4	17.9	19.6	37	37.6	37.3
AT1G19770	7080.3	7787.9	8372.5	13637	12656.4	13771.5	8841.6	7496.4	7756	14215.5	11903.9	12747.1	11093.5	8922.3	9480.1	12999	13498.1	12744.3
AT1G19780	3	1.9	0	1	0	0.9	3.9	2	0	3	0	2.1	0	0.9	0	3	3	2.2
AT1G19790	7	11.6	1	14.7	22.8	22.5	3.9	5.9	13	19.1	15.9	13.4	7.1	14.1	5.6	16	27.7	18.7
AT1G19800	271.5	278.5	270.3	378.7	384.8	402.3	261.7	302.4	282.4	442.7	360.2	373.4	275.9	288.4	260.3	449.9	428.9	449.9
AT1G19830	8	3.9	0	2.1	0	1.9	2.9	2	3	3	0	0	2	3.8	8.4	0	1	1.1
AT1G19835	2214.6	2265.5	2258.9	1804.4	2053	2119.6	2101.6	2504	2109.7	2151.2	2077.1	2183.7	2015.2	2330	2280.7	2240.5	2792.1	2467
AT1G19840	21.1	15.4	18.1	15.7	11.9	15.9	32	19.7	19	16.1	18.9	11.3	15.2	31.1	28.9	33	19.8	6.6
AT1G19850	473.7	530	509.5	630.5	702.2	652.7	517.6	474.8	488.6	545.1	536.9	536.4	523.3	529.7	587.7	526.9	500.2	443.4
AT1G19860	257.5	252.5	219.1	175.2	168.6	167.9	255.9	265	269.3	170.7	158.8	169.2	217	227.2	245.3	181	154.5	109.7
AT1G19870	1989.3	1749	1896.2	1146.6	1113.8	1144.2	1808.8	1926.8	1701.2	1065.1	1044	1159.4	1619.7	1766.4	1735	1030.8	1065.7	991
AT1G19880	821.7	820	811.9	857.1	913.4	838.4	799.7	841.2	759	777	861.4	851	847.9	850.2	818.1	819.8	808.2	796.7
AT1G19900	170	73.2	81.4	52.5	35.7	61	111.5	54.2	75.1	40.2	48.6	67	94.3	121.6	213.6	49	32.7	27.4
AT1G19910	5863.4	6606.5	6411	2744.4	2570.7	2484.4	6181.6	6221.7	6374.2	3156.1	2841.3	2624.1	6371.3	6117.2	6239.6	2898.3	2895.1	3200.1
AT1G19920	1208.9	1245	1156.6	1393.2	1550.2	1702.2	1229.2	1240.2	1371.8	1550.9	1253.4	1545.2	1291.1	1313.9	1229.4	1665.6	1538.2	1673.6
AT1G19940	150.9	141.7	133.6	94.4	138.9	86.3	167.7	130	145.2	103.4	122.1	109.3	155.2	161.2	118.5	96	141.6	114.1
AT1G19950	94.5	71.3	87.4	134.3	134.9	116.3	88.2	64	84.1	111.4	122.1	179.5	88.2	81.1	58.8	138	162.4	130.6
AT1G19960	57.3	69.4	69.3	22	16.9	14.1	56.2	41.4	42.1	9	9.9	19.6	33.5	47.1	70	5	7.9	13.2
AT1G19968	4	1.9	2	8.4	6	0.9	2.9	4.9	3	2	6.9	2.1	0	3.8	4.7	1	1	1.1
AT1G19970	109.6	170.6	91.4	74.5	59.5	76	105.7	182.2	145.2	64.2	47.6	71.2	121.7	128.2	112.9	60	46.6	69.1
AT1G19980	68.4	76.1	81.4	99.7	108.1	98.5	96.9	86.7	60.1	76.3	94.3	72.2	82.2	96.1	60.6	80	57.4	86.7
AT1G19990	87.5	72.3	71.3	126.9	156.7	132.2	68.8	87.7	65.1	100.4	97.3	140.3	61.9	66.9	63.4	109	97.1	107.5
AT1G20000	0	0	0	3.1	0	2.8	0	0	0	0	0	0	0	0	0	0	0	2.2
AT1G20010	6005.2	5536	5041.4	3619.3	3136.1	2702	6224.3	5488.8	5261.8	3002.5	3131	3410.1	5304.3	4886.3	4229.4	3262.3	3017	2914.7
AT1G20015	1	1.9	0	1	4	2.8	0	3	2	3	2	2.1	1	0	0.9	1	1	5.5
AT1G20020	620.5	483.7	392.9	6288.2	5192.1	4517.7	443	449.2	382.5	6405.6	5680.5	4504.5	205.9	277.1	207.1	7211.3	5681.3	4334.8
AT1G20030	86.5	80	89.4	114.3	119	94.7	67.9	100.5	77.1	98.4	105.2	103.1	54.8	57.5	54.1	106	99	98.8
AT1G20050	1554.9	1489.7	1438	1168.7	1121.7	1166.7	1496.7	1477.6	1428.8	1140.4	1060.9	1236.8	1447.3	1427	1437.5	1048.8	1190.5	1339.9
AT1G20060	80.5	78.1	86.4	130.1	116	108.8	91.1	86.7	62.1	92.4	84.4	126.9	105.5	96.1	97.9	107	92.1	86.7
AT1G20065	2	1	0	6.3	1	3.8	2.9	2	0	4	5	5.2	5.1	0	0.9	7	3	1.1
AT1G20070	414.4	323.8	392.9	54.6	65.5	70.3	541.9	335.9	416.5	108.4	49.6	88.7	497	361.9	431	111	98.1	86.7
AT1G20080	16.1	10.6	14.1	2.1	2	2.8	10.7	19.7	15	4	2	5.2	19.3	9.4	18.7	7	9.9	6.6
AT1G20090	1313.5	1268.1	1254.1	929.5	996.8	1030.7	1156.5	1483.5	1248.6	957.7	972.6	928.3	1134.9	1258.3	1250.9	999.8	1193.5	1040.3
AT1G20100	1362.8	1578.4	1611.8	1381.6	1544.2	1518.4	1306.7	1438.2	1435.8	1408.4	1365.5	1388.4	1393.5	1494.9	1462.6	1325.7	1444.1	1289.5
AT1G20110	2942.8	2945.8	3029.7	1952.3	2070.9	1960.1	3099.1	3023.2	3043.9	2204.5	2290.5	2056.8	3030.5	2909.7	2913.2	2057.5	2242.4	2161.9
AT1G20120	6	2.9	9	4.2	1	7.5	6.8	2	4	15.1	9.9	3.1	7.1	9.4	7.5	5	5.9	3.3
AT1G20130	0	0	0	0	0	0	0	1	1	1	0	1	1	0	0	0	0	0
AT1G20140	190.1	238	199	235	232.1	206.3	203.6	240.4	176.2	180.7	219.3	219.7	191.7	202.7	193.1	173	185.2	196.4
AT1G20150	11.1	7.7	8	1	0	0.9	6.8	9.9	5	0	0	0	9.1	5.7	6.5	1	0	0
AT1G20160	1864.6	1716.2	1521.4	93.4	71.4	81.6	2031.8	1809.6	1642.1	91.4	61.5	98	1834.7	1825.7	1904.8	93	82.2	59.3
AT1G20180	0	0	6	1	1	0	1	3	1	2	5	2.1	1	2.8	3.7	2	0	2.2
AT1G20190	2769.8	1998.5	2106.2	653.6	348.1	301.1	3406.3	2787.7	2632.4	475.8	296.7	281.6	4011.2	3136.9	2631.5	369.9	125.8	175.6
AT1G20200	1248.1	1290.3	1165.6	1172.9	1184.2	1129.2	1242.7	1320	1343.7	1074.1	1122.4	1236.8	1229.2	1268.7	1204.3	1119.7	1239.1	1125.9
AT1G20220	636.6	802.7	602.9	1356.5	1437.1	1581.2	666	703.3	611.8	1060.1	1224.6	1312.1	603.5	621.2	606.3	1204.7	1137.1	1194
AT1G20225	735.2	813.3	896.3	570.7	495.9	516.8	768.7	806.8	818.1	538.1	498.2	483.8	817.5	792.7	821.8	535.9	525.9	591.5
AT1G20230	25.1	38.5	16.1	60.8	45.6	43.1	36.8	30.5	25	41.2	31.8	49.5	25.4	21.7	30.8	40	47.5	56
AT1G20240	0	0	0	2.1	0	0	0	0	0	0	0	0	0	0	0	0	1	0
AT1G20260	4442.3	4341.1	4184.2	3631.9	3537.8	3404.4	4295.2	4265.3	4320.6	3708.2	3685.8	3882.5	4243.5	4121.8	4178	3580.2	3896.5	3839.8
AT1G20270	247.4	222.6	278.3	245.5	245	209.1	261.7	230.5	265.3	230.9	361.2	271.3	245.4	283.7	261.2	238.9	234.7	207.4
AT1G20290	0	0	1	0	0	0	1	0	1	0	0	1	0	0	0.9	0	0	0
AT1G20300	104.6	136.8	139.7	218.2	223.2	220.4	123.1	135	122.2	209.8	214.4	219.7	116.6	145.2	126.9	224.9	246.6	274.4
AT1G20310	200.1	227.4	275.3	54.6	48.6	50.6	261.7	181.3	249.3	65.3	42.7	65	223.1	167.8	275.2	76	61.4	72.4
AT1G20320	7	3.9	9	2.1	0	0.9	3.9	3.9	5	1	0	3.1	4.1	4.7	10.3	0	1	0
AT1G20330	1907.9	2041.9	1795.7	1789.7	1824.9	1866.3	1993	2187.8	2027.6	1732.6	1735.7	1724.6	1928	2092.5	1969.2	1886.6	2075	1930.3
AT1G20340	1685.6	939.5	595.9	13054.8	11576.3	11776.7	1092.5	1229.4	1493.9	15751.4	12612.5	10336.5	1170.4	1559	1082.1	15875.4	12499.7	12642.2
AT1G20350	2	0	0	4.2	3	1.9	0	0	1	9	4	0	2	0	4.7	7	3	11
AT1G20370	209.2	252.5	202	301.1	302.5	289.8	204.5	201	199.3	251	245.1	303.3	184.6	200.8	205.2	305.9	264.5	268.9
AT1G20380	95.5	84.8	52.3	54.6	42.6	50.6	67.9	80.8	60.1	46.2	37.7	57.8	79.1	75.4	76.5	54	34.7	38.4
[truncated: 23,524 more rows]

## Sheet: counts_mean
gene	Mock-D	5uM-Pic-D	50uM-Pic-D	Mock-L	5uM-Pic-L	50uM-Pic-L
AT1G01010	665.8	580.2	615.133	212.633	233.3	174.8
AT1G01020	187.633	178.1	186.933	191.967	216.3	193.833
AT1G01030	14.7667	13.0667	13.6	10.2333	15.0333	12.6667
AT1G01040	1278.5	1259.67	1326.6	732.633	777.767	800.367
AT1G01046	0	2.33333	0	0.366667	0	1.96667
AT1G01050	1049.83	988.067	1026.33	1169.57	1172.9	1116.87
AT1G01060	549.367	527.867	554	962.533	853.033	1111.47
AT1G01070	196.2	272.367	293.1	311.833	307.033	294
AT1G01080	199.533	189.633	192.1	611.733	587.633	611.667
AT1G01090	1903.67	1999.8	1962.87	2856.6	2842.87	2981.33
AT1G01100	1602.63	1723.83	1643.93	2709.03	2642.23	2836.97
AT1G01110	87.8333	96.3667	93.2667	115.333	133.5	132.5
AT1G01120	13856.4	16019.7	16549.3	3311.2	3624.4	4065.8
AT1G01130	129.733	134	127.7	81.5333	82.5667	98.6333
AT1G01140	2447.67	1917.5	1468.23	1972.37	1835.03	1336.97
AT1G01150	1.6	1	1.63333	2.03333	0.666667	2.26667
AT1G01160	508.567	471.6	491.867	449.033	421.867	440.9
AT1G01170	208.833	197.8	195.033	460.867	388.667	376.867
AT1G01180	540.067	375.567	411.333	244.5	226.433	153.6
AT1G01183	0.333333	2.26667	0	0.7	0	1.6
AT1G01190	22.1	10.5667	14.9333	294.833	261.533	270.7
AT1G01200	112.233	166.167	168.467	38.5667	34.4333	41.4
AT1G01210	157.1	186.967	235.667	130.933	139	154.4
AT1G01220	393.733	444.533	399.233	387.633	389.433	396.233
AT1G01225	53.2333	58.3667	64.3333	45.6333	56.7667	79.0333
AT1G01230	667.9	655.8	632.6	398.667	426.6	404.233
AT1G01240	334.767	312.533	269.667	202.9	186.4	165.967
AT1G01250	4.23333	5.6	6.66667	4.4	4.36667	4.66667
AT1G01260	425.8	462.5	452.433	622.767	662.333	637.967
AT1G01290	246.8	247.033	239.233	175.633	172.467	167.8
AT1G01300	3505.1	3440.57	3027.4	4209.1	3710.3	3923.27
AT1G01310	4.86667	3.93333	3.63333	1.66667	0.333333	0.333333
AT1G01320	2096.77	2178.23	1769.3	3465.3	3139.7	3366.73
AT1G01340	184.1	126.9	140.467	280.367	293.867	253.167
AT1G01350	428.9	416.1	432.667	502.233	561.4	489.3
AT1G01355	13.1333	7.56667	10.3	1.4	1	0.333333
AT1G01360	484.433	422.767	404.6	227.9	194.033	178.167
AT1G01370	57.5	60.3	54.3333	57.9333	44.5667	60.3
AT1G01380	37.5	38.7	43.9	6.9	7.4	7.3
AT1G01390	139.8	151.733	113.6	1.66667	1	3.23333
AT1G01420	106.867	72.8333	52.4	275.667	239.233	164.167
AT1G01430	1541.67	1368	1253.03	1884.2	1605.97	1147.9
AT1G01440	559.9	535.267	540.233	533.7	506.167	488.333
AT1G01448	89.2333	87.6333	76.8	100.933	89.7	73.9
AT1G01453	2.2	1.33333	3.63333	5.8	7.1	9.23333
AT1G01460	1.56667	1.63333	0.666667	0	1	0.3
AT1G01470	11753.3	10617.1	11165.4	9666.87	9341.67	8070.93
AT1G01471	0	0	0	0	0.666667	0
AT1G01480	80.1	120.9	93.3667	51.8333	82.5667	77.4
AT1G01490	1351.93	1014.5	990.433	1746.5	1618.27	1439.43
AT1G01500	276.667	240.667	244.467	196.233	194.233	148.267
AT1G01510	710.767	682.9	699.967	892.067	867.3	923.567
AT1G01520	39.2	29.8667	36.3	4.06667	4.4	8.1
AT1G01530	0.333333	0	0.333333	0	1.03333	0.333333
AT1G01540	1443.4	1705.4	1924.37	1579.93	1951.43	1894.43
AT1G01550	5628.8	5742.2	6032.53	5371.43	5986.97	5788.1
AT1G01560	13.6	31.5	25	53.3333	57.1667	60.8333
AT1G01570	21.2	20.6333	20.8667	24.0667	32.9	27.5667
AT1G01580	43.0333	28.8667	51.6333	26.5	20.5667	25.7
AT1G01590	0	0.666667	0.666667	16.8	14.1333	13.4667
AT1G01600	585.9	723.3	669.533	82.9333	51.2	76.6667
AT1G01610	1948.47	1876	1821.4	1102.7	943.1	985.367
AT1G01620	35102.5	33752.6	33283.4	7432.2	6703.3	5058.83
AT1G01630	1028.5	1121.3	1034.47	703.7	672.4	740.6
AT1G01640	470.933	424.267	418.733	195.3	190.667	162.8
AT1G01650	1258.43	1192.77	1241.6	857.067	903.5	767.767
AT1G01660	8.93333	7.86667	9.26667	18.1333	17.5667	14.9333
AT1G01670	8.66667	4.6	9.6	16.6333	10.7	16.2
AT1G01680	1.86667	1.63333	1.33333	3.36667	2.7	3.6
AT1G01690	58.8	57.1333	56.1	75.0667	81.3667	79.5667
AT1G01695	4.1	2.63333	6.53333	4.03333	3.7	4.66667
AT1G01700	70.8667	70.2333	84.7	30.0667	33.9667	27.0333
AT1G01710	626.1	587.2	642.4	521.167	515.533	479.967
AT1G01720	1550.43	1546.43	1984.03	1900.1	1729.2	1805.4
AT1G01725	66.5	76.0333	71	52.6667	48.1	44.9333
AT1G01730	486.467	503.9	498.2	375.767	392.367	358.2
AT1G01740	67.5333	60.8333	65.1	98.5333	109.667	114.667
AT1G01750	36.9667	47.2	46.2333	84.9	126.067	92.3667
AT1G01760	37.1333	37.3667	35.6333	59.6	59.9333	53.1333
AT1G01770	403.1	367.3	342.133	386.533	423.5	345.433
AT1G01780	252.833	217.867	243.867	151.267	164	152.133
AT1G01790	392.433	411.533	409.333	1834.03	1797.2	1968.67
AT1G01800	946	941.067	913.933	897.333	863.7	879.867
AT1G01810	15.7333	12.5333	15.2333	12.6333	11.4	15.5333
AT1G01820	867.833	843.167	855.967	835.633	921.667	767.4
AT1G01830	604.233	537.467	464.5	237.167	230.2	207.167
AT1G01840	14.3	9.5	6.86667	6.5	11.1	13.1667
AT1G01860	83.4	84.4	79.9	91.8667	81.9667	91.3333
AT1G01880	38.7	32.2	37.0333	37.3667	35	35.5333
AT1G01900	684.867	743.3	656.933	142.967	140.067	172.1
AT1G01910	665.6	682.1	684.833	816.7	828.333	828.367
AT1G01920	203.833	216.967	242.333	273.467	277.7	344.167
AT1G01930	269.067	219	222.633	289.1	307.233	293.4
AT1G01940	203.233	206.433	223.033	260.433	247.2	277.033
AT1G01950	713.167	824.2	853.533	808.933	822.667	910.433
AT1G01960	2276.9	2384	2249.87	2743.73	2772.43	2805.2
AT1G01970	140.6	115.333	114.767	195.633	194.033	196.633
AT1G01980	0.3	0.333333	0	1	0	0.333333
AT1G01990	337	275.533	291.333	372.833	421.433	353.233
AT1G02000	677.6	783.633	925.667	418.6	455.7	445.6
AT1G02010	195.1	211.8	189.8	141.7	138.067	142.533
AT1G02020	232	229.667	205.2	228.067	220	191.467
AT1G02030	19.3333	25.3	20.2667	5.76667	7.73333	4.3
AT1G02040	0.3	0	0.333333	0.666667	0.666667	0.333333
AT1G02050	65.7	54.1667	61.4	98.2333	104.8	107.467
AT1G02060	114	95.4	93.9	175.233	205.067	172.467
AT1G02065	2.16667	2	0.666667	2.36667	3.96667	3.66667
AT1G02070	3.56667	3.26667	2.26667	1.7	0.666667	0.3
AT1G02074	1.9	3.3	0.333333	0.666667	0.333333	0
AT1G02080	3095.03	3213.7	3086.43	2619.77	2703.77	2782.1
AT1G02090	637.267	654.6	688.867	622.7	642.233	672.867
AT1G02100	1074.2	1019.43	1042.1	593.767	640.033	584.167
AT1G02110	365.467	363.533	329.033	454.333	463.633	475.967
AT1G02120	1884.33	1807.9	1861.9	1573.6	1654.13	1485.27
AT1G02130	822.467	806.867	809.333	599.433	563.267	520
AT1G02136	0.3	0	0	0.333333	0	0
AT1G02140	2008.2	2114.1	2047	1727.37	1630.6	1628.77
AT1G02145	339.367	337.333	307.733	291.9	281.867	302.967
AT1G02150	514.133	525.933	463.233	961.8	994.267	999.733
AT1G02160	190.1	169.933	155.5	210.767	208.567	209.2
AT1G02170	779.1	791.1	765.2	892.667	978.833	830.767
AT1G02180	98.7	91.1667	104.4	61.1667	60.2	56.7667
AT1G02190	5.16667	4.93333	4.3	2.4	1.66667	2.36667
AT1G02205	5659.03	6396.5	5962.47	75.4	75.1667	86.1
AT1G02220	117.267	110.233	105.767	115.9	112.867	98.8
AT1G02230	18.9667	12.1	18.3667	4.83333	4.73333	5.9
AT1G02250	1.86667	1	1.96667	0.666667	1.03333	0.333333
AT1G02260	240.233	256	289.233	176.067	197.233	171.733
AT1G02270	1057.67	1080.8	1113.13	719.367	625.1	542.6
AT1G02280	706.433	669.467	643.467	577.667	546.833	560.367
AT1G02290	162.567	164.333	161.933	110.8	115.233	108.267
AT1G02300	153.833	124.967	107.5	109.533	93.3	56.4
AT1G02305	3131.7	2867.47	2947.9	1547.3	1475.37	1219.33
AT1G02310	127.667	96.7667	104.233	29.9667	32.6	26.9667
AT1G02330	401.567	397.133	405.067	462.7	476.233	466.067
AT1G02335	1196.77	1127.47	1181.83	1205.23	1051.4	1116.07
AT1G02340	983.433	818.9	727.467	78.5333	64.4667	56.6667
AT1G02350	9.13333	14.3667	13.6	8.96667	12.8	10.4667
AT1G02360	575.8	584.667	550.333	113.6	119.167	105.533
AT1G02370	61.3	77.5333	59.3	114.5	120.133	137.2
AT1G02380	21.1667	15.4333	16.5333	32.7	40.4667	36.8333
AT1G02390	402.6	353.667	364.367	223.967	214	177.433
AT1G02400	3036.07	3499	3844.47	1979.83	2719	2404.6
AT1G02405	10.0333	13.1667	10.5667	9.23333	8.33333	8.03333
AT1G02410	172.333	183.733	173.467	279.467	264.933	267.567
AT1G02420	53.3333	61.1667	61.6667	68.5667	85.3	74.8333
AT1G02430	22.6333	29.4667	24.8667	16.5333	18.4	23.2667
AT1G02440	8.36667	6.23333	14.8333	1.7	1.66667	3
AT1G02450	5.8	4.23333	11.8333	3.9	5.1	5.3
AT1G02460	40.4333	28.9	33.4	38.7667	36.3	37.1
AT1G02470	27.3	44.3667	31.5	7.46667	11.1333	10.3667
AT1G02475	127.2	120.9	134.433	705.833	665.7	676.9
AT1G02490	0.3	0.333333	1	1.76667	1	3.5
AT1G02500	11448.6	10989.5	11344.6	7715.1	7369	7199.43
AT1G02510	0.333333	0	0	0	0.333333	0
AT1G02520	310.733	337.6	355.7	163.3	194.7	208.533
AT1G02530	6.7	7.53333	7.5	5.26667	5.06667	6.9
AT1G02560	1010.07	1009.8	931.2	2857.27	2830.83	2789.63
AT1G02570	3.76667	3.93333	4.66667	5.13333	8.73333	7.56667
AT1G02575	1.26667	2.93333	0.666667	0.333333	2.03333	0.3
AT1G02580	27.9	26.2667	25.0333	2.1	2.7	0.3
AT1G02610	90.3	82.6333	67.7667	190.333	164.2	127.733
AT1G02620	2.23333	4.6	3.63333	5.53333	6	2.36667
AT1G02630	4.2	4.26667	6.23333	7.76667	5.36667	6.03333
AT1G02640	1063.93	1014.87	933.8	8145.8	7444.7	6538.97
AT1G02650	14.2667	22.6667	18.8	45.9	45.4333	45.3333
AT1G02660	2577.97	2631.53	3229.77	4776.9	5642.37	6498.53
AT1G02670	40.0333	40.0333	35.6	52.2	81.2	81.3667
AT1G02680	116.133	114.233	113.267	149.867	169.233	146.933
AT1G02681	2	1.33333	0.333333	1.1	1.66667	1.7
AT1G02690	331.4	327.6	338.667	448.667	415.6	520.333
AT1G02700	16.6667	22.4	18.1333	5.46667	6	7.16667
AT1G02710	23.6333	23.3333	21.1333	30.6	18.9	18.8
AT1G02720	174.767	163.133	133.833	219.167	172.333	184.8
AT1G02730	949.633	846.167	858.533	1090.1	953.333	1111.1
AT1G02740	192.933	220.733	213.9	208.1	198.133	214.6
AT1G02750	253.6	226.533	232.933	148.033	149.2	130.233
AT1G02770	16.1333	21.7	20.1667	16.2333	15.5333	10.9667
AT1G02780	5624.1	5938.47	5756.97	10458.7	10287	11237.4
AT1G02800	41.9	57.5667	40.8333	7.03333	3.66667	7.16667
AT1G02810	2161.77	1847.1	1720.27	446.1	391.033	439.867
AT1G02813	1.93333	0	0.666667	0.366667	0.666667	1.93333
AT1G02816	517.567	511.7	569.667	310.267	338.133	356.5
AT1G02820	3.83333	8.86667	4.26667	110	109.5	120.1
AT1G02830	0	0.633333	0	0	0.333333	0.633333
AT1G02840	2241.13	2272.93	2327.93	1514.9	1611.5	1653.97
AT1G02850	688.3	946.233	1061.87	1210.63	1872.03	2253.67
AT1G02860	988.133	1026.33	1096.43	3428.97	3885.87	4360.93
AT1G02870	182.933	172.2	178.267	283.2	267.433	326.567
AT1G02880	606.1	684.933	653.733	328.067	316.233	321.367
AT1G02890	3293.73	3446.2	3427.73	8183.93	8636.3	10080.4
AT1G02900	1716.67	1918.5	2057.43	2293.6	2588	2798.63
AT1G02910	351.133	378	335	747.233	748.9	717.867
AT1G02920	1514.57	1478.53	1243.97	1777.4	1829	1400.37
AT1G02930	636.8	676.467	497.9	3274.23	3269.13	2840
AT1G02940	0	0	0	17.5333	14.8	15.5333
AT1G02950	38.9	35.1333	38.9667	15.8	17.8333	11.9333
AT1G02952	0.333333	0	0.333333	0	0	0
AT1G02960	285.067	299.9	281.667	244.867	237.5	237.167
AT1G02965	0	0.333333	0.333333	0.333333	0.666667	0.666667
AT1G02970	57.8	66.0667	63.8333	42.9667	39.5333	43.4
AT1G02980	1.93333	0.666667	1.66667	0.333333	1	1.93333
AT1G02990	562.867	584.333	594.3	428.233	467.6	451.033
AT1G03000	425.6	393.8	352.067	467.2	464.633	404.4
AT1G03010	35.1667	26.5667	30.7333	23.1	15.5667	16.1667
AT1G03020	1.6	1	0.666667	18.6667	20.8	18.7333
AT1G03030	223.433	218.5	223.8	210	195.1	211.867
AT1G03040	828.267	782.6	799.933	756.867	870.2	800.833
AT1G03055	0.3	1.66667	1.3	23.7333	20.6	40.2
AT1G03060	2024.7	1988.53	2106	1843.87	1980.83	1818.63
AT1G03070	98.4	97.1667	97.3333	42.5333	43.7	43.0667
AT1G03080	3431.67	3266.47	3359.07	2563.1	2814.17	2232.67
AT1G03090	1633	1326.87	1374.3	1073.13	1351.97	956.133
AT1G03100	38.1667	35.5	42.5667	72.9	67.2333	75.8667
AT1G03103	0	0	0	0.366667	0.333333	0
AT1G03106	29.2333	20.5	36.2333	126.267	84.6667	67.4333
AT1G03110	164.433	162.667	173	222.033	243.3	292.8
AT1G03120	16.9333	11.1333	8.93333	3.13333	1.7	1.6
AT1G03130	365.333	377.167	304.567	2452.73	2395.17	2407.77
AT1G03140	835.067	818	813.267	841.233	829.767	828.467
AT1G03150	209.867	227.567	234.367	205.167	192.767	217.167
AT1G03160	441.533	415.8	401.9	578.567	548.867	518.267
AT1G03170	39.8333	37.8333	23.6333	20.8667	30.3333	42.5
AT1G03180	42.8	55.1333	44.2333	55.2333	40.3667	51.8667
AT1G03190	225.567	245.8	224.167	176.333	204.533	183.6
AT1G03200	42.9667	34.7667	43.2333	23.3333	19.8667	23
AT1G03210	522.2	488.433	518.8	302.6	314.767	275.533
AT1G03220	9144.8	8445.93	8452	13471.4	15156.8	12553.5
AT1G03230	962.867	1058.87	874.167	1628.7	1852.7	1624.57
AT1G03240	1.9	0.666667	2.63333	4.7	3.06667	4.26667
AT1G03250	421.567	402.333	423.533	437.967	458.133	422.1
AT1G03260	256.967	256.267	261.133	205.2	198.967	191.8
AT1G03270	19.7667	21.9667	16.1667	41.4333	36.8333	36.0667
AT1G03280	944.833	867.533	890.433	709.8	738.133	724.8
AT1G03290	552.3	495.8	466.3	332.333	302.833	267.833
AT1G03300	52.2333	45	43.2333	79.8667	70.5	74.9667
AT1G03310	164.2	178.967	130.233	460.733	354.3	391.333
AT1G03320	1.26667	3.93333	1.3	0	0	0.3
AT1G03330	375.067	377.733	368.333	339.1	358.567	357
AT1G03340	68.5	68.8333	61.2	23.6333	20.7333	21.7
AT1G03350	1546.43	1686.43	1597.87	1069.5	1022.97	1037.97
AT1G03360	82.6	95.4667	105.4	167.6	205.267	232.233
AT1G03365	290.167	278.2	264.8	282.867	307.533	306.267
AT1G03370	1464.5	1472.1	1451.47	1504.43	1649.33	1452.23
AT1G03380	1551.13	1340.1	1293.13	841.867	805.8	682.133
AT1G03390	0.933333	3.63333	3.66667	1.7	0.333333	0
AT1G03400	61.0333	57.3667	62.8667	97.7667	109	95.8333
AT1G03410	41.5	47.9333	53.1667	72.5667	72.9	82.3667
AT1G03430	373.667	380.067	351.2	211.3	210.5	180.933
AT1G03440	207.933	176.433	166	143.9	138.467	117.433
AT1G03445	54.4	45.3667	50.0333	18.4667	14.1333	12.7667
AT1G03457	406.067	394.1	421.367	319.9	327.6	316.267
AT1G03470	230.833	218.533	216.967	95.8	91.2	110.8
AT1G03475	838.467	851.667	783.9	1905.83	1799.07	1836.9
AT1G03490	1.56667	1.3	0.666667	0	0	0
AT1G03495	141.833	157	189.933	335.967	374.367	404.367
AT1G03502	1.93333	4.26667	4.26667	0.333333	2	1
AT1G03506	10.8667	14.1333	17.1667	5.23333	7.73333	9.93333
AT1G03510	21.8333	26.6333	25.4	37.0667	38	43.4667
AT1G03520	490.667	507.233	568.4	150.733	159.033	169.2
AT1G03530	215.8	243.9	263	276.6	359.4	411.367
AT1G03540	27.3333	29.8667	30.1333	46.7	46.4333	40.9
AT1G03550	42.2	46.4	52.3333	30.5	27.9	32.7667
AT1G03560	172.033	159.233	160.4	303.833	331.733	300.1
AT1G03580	30.1	20.9333	28.2667	51.2667	64.6333	37.3667
AT1G03590	1109.43	1321.73	1171.3	444.4	463.467	463.033
AT1G03600	426.867	446.5	343.633	1941.77	1775.5	1731.67
AT1G03610	537.733	675.733	649.967	746.3	890.033	778.367
AT1G03620	70.9	63.7333	88.0333	204.7	160.8	152.9
AT1G03630	149.8	154.067	129.8	920.4	813.233	989.133
AT1G03650	30.9	28.5667	42.5	65.1667	72.2	62.5667
AT1G03660	13.5	7.56667	7.56667	3.63333	4.1	6.4
AT1G03670	0.3	0	0.333333	0.333333	0.333333	0.633333
AT1G03680	288.2	292.567	229.767	2128.2	1932.9	1954.7
AT1G03687	94	97.2	90.6	143.333	150.233	164.867
AT1G03700	27.3333	22.7	26.6333	17	19.9	15.1
AT1G03710	1.6	1.63333	1.33333	1.06667	0.333333	0.666667
AT1G03730	972.367	908.333	972.867	542.8	555.267	524.8
AT1G03740	2288.7	1884.6	1927.8	2565.1	3211.6	2522.77
AT1G03746	0	0	0.333333	0.333333	0	0.333333
AT1G03750	165.067	146.333	133.667	109.567	127.7	108.9
AT1G03760	91.2	100.867	101.633	162.5	165.1	161.167
AT1G03770	177.867	174	181.367	231.933	264.467	227.767
AT1G03780	296.9	252.433	247.567	241.133	189.733	283.367
AT1G03790	826	665.1	908.6	32.9	41.3333	40.7667
AT1G03800	20.4333	23.2333	32.3333	8.5	11.0667	17.6667
AT1G03820	113.033	158.1	204.867	621.2	757.667	1343.77
AT1G03830	105.5	110.967	96.8333	237.5	228.933	229.4
AT1G03840	51.6	34.7333	33.0333	207.233	126.033	98.5667
AT1G03850	829.633	620.467	591.833	537.133	481.467	292.7
AT1G03860	626.3	660.3	667.167	1262.67	1255.87	1235.3
AT1G03870	7116.27	9264.37	9017.67	3861.33	3341.37	4250.63
AT1G03880	22	15.6333	84.5	0	0.7	0.333333
AT1G03890	0.3	1	8.36667	3.7	1.66667	1.96667
AT1G03900	2731.6	2705.9	2693.73	1803.3	1859.33	1638.23
AT1G03905	161	156.067	164.533	129.6	138.833	120.8
AT1G03910	972.9	951.133	941.733	1094.2	1143.43	1153.23
AT1G03920	212.067	191.8	219.533	84.7333	90.1333	107.867
AT1G03930	643.367	701.767	681.533	559.367	563.4	531.167
AT1G03935	78.5	84.2667	90	16.7333	30.8667	25.4
AT1G03940	156.867	157.5	175.633	193.933	215	272.933
AT1G03950	307.333	275.233	290.833	216	219.433	171.4
AT1G03960	200.067	195.167	203.367	177.4	179.133	177.067
AT1G03970	161	155.3	146.8	243.367	236.967	215.433
AT1G03980	8.93333	6.23333	3.96667	12.5333	8.13333	18.3667
AT1G03982	0.3	0	0.333333	0.366667	0	0.3
AT1G03990	95.9667	100.833	123.867	44.8	53.5333	55
AT1G04000	222	235.2	227.667	111.4	108.967	127.967
AT1G04010	229.567	235.167	249.733	169.067	155.333	169.8
AT1G04020	130.567	129.167	131.5	120.367	109.567	141
AT1G04030	289.167	257.933	289.733	97.9	100.467	104.3
AT1G04040	2262.07	2374.7	2198.5	1508.63	1514.23	1379.33
AT1G04050	102.467	94.6	96.1667	96.5333	95.6333	109.767
AT1G04070	158.1	168.467	176.967	162.667	190.933	151.433
AT1G04080	2007.27	1902.47	1944.27	1987.3	2262.23	2167.8
AT1G04090	29.4667	30.3	24.4333	9.73333	14.1667	15.1
AT1G04100	126.267	174.8	212.033	169.033	243.9	237.6
AT1G04110	4.56667	5.56667	8.6	8.83333	11.0333	17.4
AT1G04120	3316.9	3217.07	3188.77	2086.27	2016.77	1854.5
AT1G04130	157.367	174.033	159.267	136	142.2	135.967
AT1G04140	2398	2397.13	2428.6	1960.5	2068.3	2059.63
AT1G04150	1.26667	1.96667	0.333333	3	2.33333	12.2
AT1G04160	357.2	375.133	339.2	346.367	313.867	365.733
AT1G04170	1537.97	1587.8	1652.43	1655.47	1721.2	1873.33
AT1G04171	0	0.333333	0.333333	0.333333	0	0
AT1G04180	77.8333	35.7333	46.8667	36.8333	39.3667	25.7
AT1G04190	552.467	611.1	605.433	594.933	573.233	670.7
AT1G04200	1117.33	1154.33	1108.97	1244.3	1139.8	1197.5
AT1G04210	1125.5	1140.57	1173.57	1334.57	1398.43	1540.83
AT1G04220	3387.9	3151.4	2964.53	270.067	261.933	292.2
AT1G04230	254.133	261.9	247.9	208.9	221.5	190.1
AT1G04240	2012.27	4937.83	6497.4	1753	3182.7	5633.37
AT1G04250	5888.93	7235.97	7747.13	981.633	1308.13	2442.2
AT1G04260	281.7	334.5	330.733	265.7	265.567	292
AT1G04270	2489.37	2661.83	2698.53	3537.47	3677	4156.67
AT1G04280	935.633	830.5	858.733	1069.43	1088.6	1002.47
AT1G04290	0.3	1.33333	0	1	1.33333	0.966667
AT1G04300	1694.9	1611.5	1626.37	1601	1720.5	1645.97
AT1G04310	615.367	556.6	720.467	243.4	208.567	347.533
AT1G04330	14.1333	15.1	15.4667	113.167	81.1667	131.033
AT1G04340	302	333.3	324.4	349.533	322.2	349.5
AT1G04350	132.067	107.233	123.4	877.933	818.7	879.433
AT1G04360	44.7	33.4333	31.1333	170.267	156.8	168.5
AT1G04370	0	0.333333	0.666667	60.6667	62.2667	94.3
AT1G04380	5.46667	2.3	3.96667	13.8333	18.8333	11.1667
AT1G04390	231.633	228	245.3	171.5	147.4	141.867
AT1G04400	3554.83	3370.97	3317.3	2852.83	2865.4	2637.07
AT1G04410	16575.3	16492.5	16742.3	14088.9	14310.8	12878.6
AT1G04420	204.133	203.633	181.3	864.067	827.1	801.4
AT1G04425	13.6333	13.4667	9.56667	65.4	67.8667	81.4333
AT1G04430	3478.6	3694.23	3514.87	6768.97	6100.43	6381
AT1G04440	2208.13	2408.47	2439.83	1962.67	2191.13	1996.73
AT1G04445	5.76667	7.9	8.26667	3.2	6.06667	8.9
AT1G04470	0	1.33333	1.33333	0	0	0.3
AT1G04480	1224.87	1307.03	1349.9	2287.9	2287.6	2531.7
AT1G04490	125.433	137.433	126.133	106.7	81.5667	105.5
AT1G04500	2.93333	0.333333	1.66667	0.333333	0.333333	1.56667
AT1G04510	814.167	835.6	795.333	892.633	933.1	941.833
AT1G04520	187.5	198.733	176.2	183.9	173.867	253.967
AT1G04530	448.6	451	455.333	379.167	376.7	419.8
AT1G04540	82.4333	117.667	122.167	94.2333	121.2	115.967
AT1G04550	449.233	770.667	945.9	383.2	510.2	787.233
AT1G04555	119.967	127.6	111.833	115.7	116.933	123.8
AT1G04560	50.9	55.2	82.9667	32.2	17.8	27.6
AT1G04570	26.9333	26.2333	32.9333	6.56667	9.43333	11.4333
AT1G04580	1.86667	0.666667	1	1.73333	3	2.03333
AT1G04590	196.567	195.1	176.967	281.8	314.2	319.433
AT1G04600	8.26667	10.8333	10.9	28.5	22.2333	18.6333
AT1G04610	31.9667	40.6	66.0333	23.9333	25.4667	27.4667
AT1G04620	168.733	157	155.367	440.2	443.4	424
AT1G04630	322.433	362.333	332.9	465.733	457.4	421.9
AT1G04635	17.2667	19.7333	23.4667	26.4	22.2667	37.8667
AT1G04640	64.7333	63.9667	59.6333	307.133	314.067	319.733
AT1G04650	35.1333	32.1	29.3333	30.4333	28.8333	41.1333
AT1G04660	4.73333	9.9	8.26667	5.2	4.7	1.6
AT1G04670	0	0.966667	0	0.333333	0	0
AT1G04680	2731.17	3042.67	2559.7	2387.87	2103.73	2906.3
AT1G04690	1451.23	1485.07	1428.27	1439.17	1397	1407.33
AT1G04700	45	45.3333	49.3	48.4667	46.8667	47.5
AT1G04710	125.167	129.667	126.767	406.7	396.6	411.9
AT1G04730	98.8667	103.133	100	104.567	113.6	138.8
AT1G04750	1984.27	1953.73	1935.37	1693.2	1639.5	1686.97
AT1G04760	51	49.2	47.5333	44.4333	46.4333	46.4667
AT1G04770	261.5	337.667	397.467	321.633	213.1	303.267
AT1G04778	35.8	52.1333	56.0667	25.8333	32.3	41.7667
AT1G04780	1353.97	1306.83	1262.57	1327.83	1382.23	1264.7
AT1G04790	376.433	371.567	391.367	448.067	458.9	456.2
AT1G04800	310.733	350.1	294.533	171.5	144.133	186.867
AT1G04810	1614	1574.2	1606.17	1341.1	1393.1	1330.97
AT1G04820	11720.8	12743.1	12064.8	7636.87	7033.33	8492.53
AT1G04830	499.167	495.8	518	312.433	326.2	272.933
AT1G04840	23.0667	23.9667	25.8	41.6667	35.4333	44.2333
AT1G04850	1770.57	1783.5	1811.2	1736.23	1717.93	1775.87
AT1G04860	741.733	754.133	785.833	832.267	881.7	840.267
AT1G04870	444.133	478.367	553.433	734.267	760.1	881.767
AT1G04880	9.83333	9.86667	9.93333	13.4	12.4667	12.0667
AT1G04900	99.6	101.133	97.6333	193.233	200.4	222.6
AT1G04910	796.267	878.567	845.4	725.333	693.033	709.4
AT1G04920	15.6667	23.3333	25.6333	9.7	9.66667	18
AT1G04930	69.3667	67.0333	72.7	96.8	111.867	116
AT1G04940	0.966667	1	0.333333	3.16667	1.33333	1.3
AT1G04945	125.433	122.967	150.467	149.933	174.2	202.567
AT1G04950	374.233	328.533	351.6	325.8	334.233	332.667
AT1G04960	718.567	655.5	706.933	558.767	603.667	533.3
AT1G04970	796.2	796.633	809.2	483.8	493.733	431.967
AT1G04980	206.967	237.133	227.033	422.467	375.367	395.367
AT1G04985	408.833	344.933	374.1	449	457.067	448.067
AT1G04990	594.7	630.167	614.067	632.867	592.967	567.6
AT1G05000	183.8	227.833	207.7	206.333	214.2	210.5
AT1G05010	2961.97	2629.2	2589.07	2228.1	2585.77	2139.43
AT1G05020	107.233	107.467	106.833	78.2667	80.6333	65.7667
AT1G05030	174.167	174.833	176.8	157.833	163.033	140.033
AT1G05040	0.966667	0	0.666667	0.366667	0	0
AT1G05055	203.067	188.567	199.2	200.167	189.433	202.367
AT1G05060	276.567	262.6	245.633	248.2	242.8	215.867
AT1G05061	6.73333	7.9	8.93333	8.56667	9.36667	13.1333
AT1G05065	12.5	17.4	20.5	9.83333	13.8333	14.0667
AT1G05070	205.867	223.6	202.633	221.333	209.6	243.9
AT1G05080	0.3	0.333333	0	0	0.7	0
AT1G05090	92.7667	90.7	92.3667	96.5	84	90.5333
AT1G05100	59.0333	74.8	77.4667	52.5333	39.3667	46.2333
AT1G05120	718.133	703.167	721.433	554.3	574.733	545.6
AT1G05135	2232.2	2173.2	1904.87	1484.8	1400.2	1032.3
AT1G05140	231.367	226.667	208.833	399.567	323.067	330.467
AT1G05150	1029.57	1160.07	1155.1	724.233	698.333	753.967
AT1G05160	140.167	139.533	122.567	129.2	132.667	126.633
AT1G05170	368.767	431.533	415.5	148.533	144.5	148.9
AT1G05180	670.1	672.8	729.533	712.367	728.3	711.533
AT1G05190	693.6	763.633	613.7	2477.3	2237.63	2435.97
AT1G05200	310.767	310.533	298.233	301.633	283.8	260.833
AT1G05205	239	225.1	224.433	251.6	243.1	250.133
AT1G05210	64.3667	74.3667	64.0667	66.6333	58.4333	65.3333
AT1G05220	8.96667	9.83333	9.53333	13.2667	12.8	11.2333
AT1G05230	613.2	575.933	575.1	230.133	231.3	240.5
AT1G05240	0.333333	0	0.333333	1.33333	1	1
AT1G05250	0	0	0.333333	0.7	0.666667	0.966667
AT1G05260	7503.07	6619.7	6630.73	619.267	627.9	554.933
AT1G05270	742.2	785.333	757.533	643.467	658.5	620.433
AT1G05280	11.4	16.0667	7.23333	39.8333	36.8667	38.8
AT1G05290	0	0	0	0.666667	0	0
AT1G05300	70.9667	54.1	42.9	283.933	247.9	141.7
AT1G05310	334.333	282.867	328.6	210.267	195.3	198.867
AT1G05320	618.2	543.467	587.9	743.233	738.433	688.4
AT1G05330	6.4	4.9	4.3	2.03333	0.333333	0.933333
AT1G05340	1543.77	1253.8	1328.47	582.767	611.967	472.5
AT1G05350	580.233	576.9	600.633	597.7	576.233	619.1
AT1G05360	212.567	218.8	196.467	137.033	145.633	153.1
AT1G05370	44.3667	41.3333	43.2667	34.7667	33.1667	39.9333
AT1G05380	1082.3	1053.9	1153.1	1074.23	1175.4	1138.97
AT1G05385	66.3	78.1667	69.2	170.233	170.867	160.767
AT1G05400	34.8	34.4667	28.3	23.5667	25.1667	32.3
AT1G05410	218.567	209.067	215.533	250.667	280.2	297.6
AT1G05420	94.6333	91.1667	91.7	37.7	67.6333	64.1
AT1G05430	339.267	366.167	358.633	346.867	327.033	327.633
AT1G05440	22.7667	22.9	26.1	21.5667	23.9667	30.1667
AT1G05450	40.3	27.5	36.7667	19.7	22.7	30.9667
AT1G05460	132.733	101.967	117.9	170.5	158.2	153.567
AT1G05470	333.067	321.333	370.3	259.733	266.833	326.167
AT1G05490	81.7333	93	86.6	26.2667	23.9333	27.6
AT1G05500	1000.03	958.9	1023.8	821.433	823.2	754.933
AT1G05510	13.0667	15.0333	11.3	2.43333	2.03333	2.66667
AT1G05520	1208.8	1286.37	1297.33	1091.87	1077.2	1178.07
AT1G05530	13.8667	9.53333	4.66667	15.2667	19.8667	7.56667
AT1G05540	2.8	1.96667	2.66667	3.7	4.66667	4.9
AT1G05550	1.6	0.333333	0.666667	0	0	0
AT1G05560	3.16667	2.26667	4.66667	12.5	8.06667	14.1667
AT1G05570	4386.97	3947	4135.7	2491.33	2790.87	2258.27
AT1G05575	721	563.867	559.933	426.467	457.5	387.7
AT1G05577	5.96667	4.9	9.5	6.56667	5	7.73333
AT1G05590	254.467	288.967	240.933	225.433	203.5	215.367
AT1G05600	88.2667	88.6333	82.9667	65.8667	58.2667	62.3333
AT1G05610	19.9667	13.1667	16.1333	9.5	15.1333	12.1333
AT1G05615	0	0.666667	0	0	0	0
AT1G05620	507.033	541.567	545.033	423.733	461.1	437.633
AT1G05630	229.933	262	288.4	331.067	312.933	364.033
AT1G05640	52.6	52.7333	49.4333	84.8	73.0333	77.3333
AT1G05650	27.9	13.8333	1.66667	8.43333	3.36667	0
AT1G05660	40.2	26.4667	10.3	32.1	26.2	4.2
AT1G05670	128.667	118.9	134.1	101.7	119.2	124
AT1G05675	230.933	265.9	227.567	266.333	304.433	309.967
AT1G05680	116.5	164.267	164.3	110.033	133.867	164.2
AT1G05690	23.4	16.7667	24.4667	31.2667	23.1667	22.8333
AT1G05700	136.933	103.7	93	72.9667	77.3667	77.3
AT1G05710	515.4	639.733	691.6	612.3	574.767	632.033
AT1G05720	135.767	156.8	131.3	114.2	96.6667	98.4333
AT1G05730	11.1333	11.5	15.6	18.8667	26.2333	23.7
AT1G05740	0.666667	1	1.96667	0	1.66667	0.633333
AT1G05750	51.8667	40.8	45.1	100.867	90.0333	101.733
AT1G05770	49.8333	43.8333	47.1	60.9333	71.0333	55.5333
AT1G05780	90.9	102.133	101.667	80.5	84.3	75.4333
AT1G05785	140.033	135.6	140.233	79.6	83.0667	68.9667
AT1G05790	479.967	483.267	512.967	299.6	319.7	297.4
AT1G05800	4.23333	4.3	5.6	35.0667	31.5667	25.4333
AT1G05805	496.333	371.1	303.233	638	562.2	457.533
AT1G05810	415.6	411.6	377.4	242.033	230.933	207.2
AT1G05820	93.7333	88.7	89.9667	72.8	71.8	67.9
AT1G05830	888.967	841.933	885.3	715.6	762.933	767.433
AT1G05835	151.633	149.967	154.333	15.2333	18.4667	21.7
AT1G05840	572.867	496.1	480.133	396.6	429.5	398.6
AT1G05850	17903.6	18432.6	18605.5	16967.7	15534.7	15237.5
AT1G05860	129.5	160.367	179.833	166.233	131.967	154.5
AT1G05870	547.067	509.367	425.233	190.833	189.433	179.367
AT1G05880	2	1	1.3	2.03333	1.36667	1.3
AT1G05890	2170.87	1954.57	1924.87	1235.33	1304.37	1160.87
AT1G05894	9.06667	14.8	12.5667	10.2667	7.06667	5.56667
AT1G05900	168.767	159.2	189.467	126.533	144.733	137.3
AT1G05910	608.633	656.333	637.9	665.667	693.367	685.667
AT1G05920	0	0.333333	0	0	1	0
AT1G05930	0.933333	0.333333	0.333333	0	0.666667	0.633333
AT1G05940	757.667	747.733	753.733	697.2	684.667	631.2
AT1G05950	87.7667	91.6	86.7667	87.5	83.3667	117.933
AT1G05960	1708.47	1780.83	1745.97	1562.9	1843.77	1794.6
AT1G05970	51.9333	54.4667	53.5333	69.9667	67.9	64.9333
AT1G05990	0.933333	0	1	3.73333	2.73333	3.3
AT1G06000	248.467	303.333	249.333	148.633	149.7	163.933
AT1G06010	89.3333	84.9667	93.3667	95.0667	83.6667	68.4
AT1G06020	25.4	22.4333	23.5333	12.8667	9.4	8.96667
AT1G06030	3.56667	4.93333	2.66667	1	2	0.7
AT1G06040	4058.33	3874.93	3127.83	1238.4	1158.4	1041.8
AT1G06050	216.533	217	210.4	84.2333	89.6667	77.7333
AT1G06060	610.7	561.133	528.1	291.533	307.2	270.167
AT1G06070	369.667	371.867	383.333	337.267	346.933	364.7
AT1G06080	462.433	343.6	328.033	88.2333	83.1667	128.567
AT1G06090	382.1	375.367	383.1	72.6	76.6333	69.2667
AT1G06100	0	0.966667	0.966667	0.366667	2	3.43333
AT1G06110	1080.13	1012.7	1032.57	518.3	532.433	457.867
AT1G06120	18.4667	20.9667	17.1667	10.9333	15.5	6.3
AT1G06130	373.2	391.367	363.933	444.2	432.333	407
AT1G06135	11.3667	15.6667	13.1333	7.53333	8.4	8.23333
AT1G06140	28.6667	28.5	29.7667	25.0333	26.5667	28.8
AT1G06148	2.83333	2.93333	1.66667	6.86667	10.1	4.33333
AT1G06150	31.9667	29.2	28.4333	46.4333	39.6	36.8333
AT1G06160	40.4333	52.3333	49.6	853.933	698.5	714.667
AT1G06170	8.13333	5.56667	6.56667	8.66667	11.1	7.63333
AT1G06180	44.3667	44.8333	47.6	91.0333	104.1	111.5
AT1G06190	321.667	304.567	289.167	713.233	671.333	720.433
AT1G06200	1076.17	1039.53	1079.73	957.367	945.433	819.367
AT1G06210	593.9	588.333	543.6	571.6	545.8	584.667
AT1G06220	934.933	1017.8	992.233	1263	1363.43	1541.97
AT1G06225	1.56667	1.3	0.666667	0	0	0
AT1G06230	1299.83	1316.6	1346.27	1169.73	1209.07	1266.57
AT1G06240	65.2	66.1	58.7333	107.733	113.2	112.6
AT1G06250	18.8667	17.7	21.8333	17.1667	17.1667	23.9
AT1G06265	23.0333	22.6667	18.5	15.6667	17.5333	19.3667
AT1G06270	53.2333	55.5333	59	63.8	67.0333	78.8
AT1G06290	1217.87	1172.2	1151.33	1301.9	1278.07	1185.53
AT1G06310	2.86667	1.63333	1.63333	10.4333	9.4	11.4667
AT1G06320	3.8	4.23333	1.96667	2.4	4.06667	4.23333
AT1G06330	6.86667	9.2	8.86667	7	4.4	6.9
AT1G06340	3.9	1.33333	1.3	0.333333	0.333333	1.96667
AT1G06350	196.967	253.033	186.6	45.7667	42.3333	38.5333
AT1G06360	382.1	368.067	311	81.9	44	84
AT1G06370	57.9	44.4667	49.6	55.2333	54.7667	51
AT1G06380	142.1	169.6	171.833	178.067	200	227.767
AT1G06390	1281.27	1336.3	1308	1379.67	1516.33	1563.57
AT1G06400	1807.07	1685.53	1773.1	1450.3	1406.67	1263.4
AT1G06410	4686.4	4922	4916.37	6930.47	6977.63	6773.63
AT1G06420	13.6667	11.1667	12.2333	28.5333	25.9667	30.5
AT1G06430	551.667	566.3	492.6	1898.1	1784.3	1825.17
AT1G06440	52.3667	56	56.5667	69.7333	68.0333	60.6667
AT1G06450	178.133	171.433	164.933	97.3333	106.567	106.333
AT1G06460	197.9	208.233	171.5	1838.97	1719.63	1329.5
AT1G06470	475.267	517.267	478.067	521.2	532.433	549.533
AT1G06475	49.8	37.1333	47.5667	58.8333	40.7667	43.3333
AT1G06490	382.367	383.667	385.433	264.9	281.167	269.8
AT1G06500	116.4	92.3333	95.9333	148.567	142.4	137.333
AT1G06510	122.1	111.333	112.933	291.033	275	274.9
AT1G06515	209.2	219.6	203.5	232.133	203.2	207.667
AT1G06520	208.933	161.333	144.433	125.067	92.2667	66.3333
AT1G06530	879.7	908.133	871.4	1053.97	1026.47	967.867
AT1G06540	6.56667	5.9	7.23333	9.23333	2.33333	5.56667
AT1G06550	573.6	533.2	522.167	709.033	671.8	722.033
AT1G06560	155.833	130.3	133.8	230.967	245.233	276.1
AT1G06570	1243.03	1246.47	1203.27	715.233	836.767	573.967
AT1G06580	72.1333	62.3667	59.7	91.6667	80.9	70.8667
AT1G06590	182.333	180	190.933	236.9	240.967	272.867
AT1G06620	1652.5	1759.03	1966.4	1486.33	1625.4	1495.83
AT1G06630	573.367	592.367	605.8	613.167	593.967	613.533
AT1G06640	4292.47	4078.77	4420.27	7445.9	6416.37	6293.73
AT1G06645	46.4667	45.3667	49.7333	76.8667	62.1	61.5
AT1G06650	223.9	217.4	228.6	826.7	818.933	736.833
AT1G06660	48.3333	42.4	45.3333	91.9333	78.4	99.2667
AT1G06670	781.233	877.567	924.4	1022.1	1107.3	1247.23
AT1G06680	2056.93	2288.63	1822.37	17444.1	16429.2	15679.8
AT1G06690	152.167	146.8	137.767	761.067	706.833	749.533
AT1G06700	2814.83	2792.53	2874.4	1733.73	1722.67	1578.17
AT1G06710	82.1333	84.8	80.1333	80.2333	97.5333	105.467
AT1G06720	489.6	517.533	559.833	904.1	1016.87	1176.83
AT1G06730	240.667	284	260.233	263.133	264.267	268.2
AT1G06740	85.7333	70.9333	67.6667	115.3	129.533	110.6
AT1G06750	5.13333	2.93333	3.9	3.73333	5.43333	5.93333
AT1G06760	1940.5	2034.07	2148.33	1712.67	1789.97	1839.47
AT1G06770	94.5667	103.367	85.4333	132.3	160.133	151.667
AT1G06780	647.8	623.733	699.967	401.6	431.467	395.333
AT1G06790	92.4667	95.1667	91.7333	97.1333	95.6333	97.1333
AT1G06800	678.333	646.2	668.1	553.067	591.867	473.533
AT1G06810	0.933333	0.666667	0.333333	0	0.333333	0.3
AT1G06820	266.767	283.133	294.4	514.067	541.4	527.767
AT1G06830	4.73333	5.6	3.6	414.533	359.433	424.633
AT1G06840	1509.1	1435.93	1361.23	1125.33	1201.63	1024.5
AT1G06850	387.667	435.6	515.333	375.467	397.9	396.667
AT1G06860	0	0.333333	0.333333	0	0	0
AT1G06870	415.567	449.833	488.667	410.9	410.633	459.6
AT1G06890	1358.33	1396	1357.17	1336.47	1408.67	1379.27
AT1G06900	1014.3	1037.13	1071.03	1070.73	1151.37	1195.3
AT1G06910	69.7333	58.8	75.4333	54.2667	65.3667	59.9667
AT1G06920	2.86667	2.93333	7.6	0	0	0.3
AT1G06923	2.56667	1.96667	2.3	8.5	8.13333	4.86667
AT1G06930	25.2667	20.7	16.1333	13.7	13.5	12.1
AT1G06950	1509.6	1504.13	1428.3	2641.8	2672.07	2800.77
AT1G06960	159.933	171.5	158.767	180.7	160	164.633
AT1G06970	5.46667	3.63333	4.23333	2.33333	3.7	3.96667
AT1G06980	334.533	205.7	163.567	11.5333	3.73333	4.06667
AT1G06990	0	0	0	0.333333	0	0.333333
AT1G07000	1574.77	1497.53	1590.2	1195.1	1310.77	1171.37
AT1G07010	92.3667	99.2667	68.9667	586.767	558.767	602.467
AT1G07020	257.467	299.4	271.167	271.533	272.3	243.267
AT1G07030	394.667	429.9	432.567	412.967	459.233	450.367
AT1G07040	564.833	525.1	478.433	545.033	625.033	465.267
AT1G07050	16.3333	19	11.7	16.6667	9.73333	15.5667
AT1G07060	1.9	0.666667	0	0.333333	1.66667	2.3
AT1G07070	108.2	108.633	111.867	148.633	151.867	170.133
AT1G07080	2298.3	2361.53	2428.03	1444.73	1376.7	1252.33
AT1G07090	577.267	470.6	479.467	560.133	620.5	598.9
AT1G07110	988.4	968.067	948.9	1560.2	1578	1395.27
AT1G07119	0	0	0	1	0	0
AT1G07120	7.3	2.96667	4.96667	11.7333	8	9.5
AT1G07128	0	0	0	0	0.666667	0.666667
AT1G07130	3.6	2.93333	2.63333	5.43333	6.36667	4.36667
AT1G07135	3185.43	2429.27	2283.37	4159.93	3938.83	3485.8
AT1G07140	4195.87	4226.4	4350.1	4086.37	4144.97	4032.6
AT1G07150	502.967	553.933	449.267	280.967	437.233	704.567
AT1G07160	298.267	298.567	297.2	14.9	18.9	12.6667
AT1G07170	214.033	219.967	216.633	233.7	243.933	220.667
AT1G07175	9.86667	12.1	7.63333	2.06667	5	3.6
AT1G07180	4.66667	3.6	2.63333	222.067	206.4	309
AT1G07200	917.967	723.833	643.9	968.067	837.167	625.2
AT1G07210	352.733	344.333	303.8	509.367	523.433	510.233
AT1G07220	355.3	334.1	330	558.3	580.567	584.8
AT1G07230	881.6	824.367	799.967	683.067	678.533	663.233
AT1G07240	1630.5	1643.33	1756.83	1782.43	1900.53	1715.57
AT1G07250	570.267	585.133	539.067	665.467	600.867	576.5
AT1G07260	417.233	319.833	362.033	551.333	527.933	384.8
AT1G07270	19.1667	19.7333	16.2667	14.9333	10.4333	14.3667
AT1G07280	196.7	188.067	169.2	638.6	469.4	344.167
AT1G07290	35.5667	45.3667	42.5333	28.9667	30.9	27.7333
AT1G07300	81.8	59.1333	69.8333	58.9333	60.4333	52.4
AT1G07310	1168.93	1117.4	1141.9	917.333	887.333	768.533
AT1G07320	869.1	915.167	738.067	2561.17	2338.77	2509.2
AT1G07330	1.3	0.666667	1	0	3.73333	1.3
AT1G07340	0	0	0	1.73333	0.666667	0.933333
AT1G07350	809.133	760.333	775.9	881.867	773.367	963.9
AT1G07360	901.767	961.867	966.9	902.467	937.2	957.2
AT1G07370	183.833	199.167	181.867	199.033	181.267	259.533
AT1G07380	537.8	525.833	519.567	411.6	415.367	411.333
AT1G07390	50.3	55.7667	75.7	112.067	112.2	131.2
AT1G07400	65.0333	71	43.8333	98.4667	89.2	90.1667
AT1G07410	95.7333	112.833	94.2	86.9	102.733	99.7667
AT1G07420	698.8	797	789.367	751.967	692.733	721.6
AT1G07430	107.533	97	116.933	22.6667	16.4	27.8333
AT1G07440	56.3333	63.5667	43.1667	454.567	371.767	352.2
AT1G07450	0.3	0	0	29.1667	20.1	32.8667
AT1G07470	510.967	495.967	517.567	383.067	373.3	370.033
AT1G07473	2.63333	2.93333	1.63333	1.7	0.666667	1.3
AT1G07476	0	1.3	0	0.333333	0	0
AT1G07480	479.367	475.767	439.133	314.567	346.6	325.233
AT1G07500	21.8667	28.5333	24.1	50.9	52.5	54.4
AT1G07510	896.367	909.5	872.533	1074.87	1119.23	1116.57
AT1G07520	644.233	604.233	560.8	414.067	461.933	425.033
AT1G07530	825.2	777.833	766.5	801.333	807.233	751.867
AT1G07540	0.333333	1.33333	0.333333	0	0	0.333333
AT1G07550	26.8667	20.9667	18.7667	6.83333	7.66667	5.86667
AT1G07560	104.733	85.6333	91.3667	29.2667	30.7	31.4333
AT1G07570	688.967	708.2	738.267	177.767	177.033	190.5
AT1G07590	303.733	288.933	331.967	290.333	310.6	272.733
AT1G07610	1953.57	1599.7	1936.77	828.7	748.833	845.1
AT1G07615	88.8667	80.4	84.5333	170.4	187.933	162.133
AT1G07620	79.4333	68.5667	79.5	36.7333	53.3	45.1667
AT1G07630	824.833	900.333	911.833	527.933	584.3	552.1
AT1G07640	528.733	668.7	777.833	351.3	474.5	507.467
AT1G07645	9.06667	6.56667	5.23333	5.3	4.06667	4.63333
AT1G07650	3351.87	3142.57	2890.63	1529.6	1429.67	1222.2
AT1G07660	327.133	325.9	324.433	310.867	313.433	337.6
AT1G07670	2492.27	2363.4	2284.87	2410.6	2190.73	2189.73
AT1G07680	1.26667	0.666667	1.33333	0	0.666667	0
AT1G07690	45.3667	41.5667	34.9333	1.76667	3.3	3.7
AT1G07700	98.1333	103.9	117.567	515.567	507.4	498.367
AT1G07705	330.833	322.3	330.933	331.4	329.267	350.3
AT1G07710	33	21.6333	24.2	22.2	16.2333	15.3
AT1G07720	5216.73	5011.57	4947.77	1652.87	1426.17	1055.43
AT1G07725	0	0	0	0.333333	0	0.333333
AT1G07740	42	27.5333	37.0667	63.9	64.9333	62.0667
AT1G07745	68.3667	66.3	69.4667	65.7333	59.1667	62.5667
AT1G07750	947.5	923.933	873.633	442.067	480.567	393.933
AT1G07770	1768.93	1741.4	1811.5	1998.27	1917.27	2027.8
AT1G07780	77.9667	92.2333	106.433	185.467	193.3	266.933
AT1G07790	401.167	411.3	434.3	405.4	394.8	463.133
AT1G07795	0.333333	1	1	1.33333	2.36667	2
AT1G07810	1627.93	1606.8	1692.83	1253.8	1269.43	1261.2
AT1G07820	677.667	724.9	757.967	713.733	676.4	766.733
AT1G07830	163.833	146.267	164.167	280.467	258.7	292.133
AT1G07840	288.1	324.333	304.367	338.233	354	355.567
AT1G07850	2.23333	3.63333	4.63333	2.06667	3.36667	2.66667
AT1G07860	0	0	0.666667	0	0.333333	0
AT1G07870	536.933	566.4	621.6	529.867	487.233	487.967
AT1G07880	119.467	86.0667	97.1	365.533	327.733	347.267
AT1G07885	1.86667	2	2.3	12.4333	8.36667	10.1
AT1G07890	11630.8	10768.4	10378.5	18334.5	17715.9	14666.5
AT1G07900	15.3	5.93333	5.93333	54.1333	32.9333	17.5
AT1G07901	50.9667	51.2667	47.4333	39.6667	41	27.5
AT1G07910	324.733	315.367	341.533	348.133	370.967	352.833
AT1G07920	3950.93	4029.37	4174.1	4753.7	4693.43	5028.77
AT1G07930	4171.93	4387.87	4408.9	7407.63	7567.33	7980.53
AT1G07940	4038.33	4122.17	4279.97	4829.37	4753.6	5072.93
AT1G07950	254.967	246.7	234.8	227.1	235.867	224.233
AT1G07960	481.767	518.333	513.233	363.7	392.1	351.1
AT1G07970	192.167	174.1	180.8	274.767	296.4	271.933
AT1G07980	214.9	209.767	214.7	244.5	242.8	244.033
AT1G07985	299	350.7	314.7	55.5	62.6	71.3667
AT1G07990	1257.37	1210.23	1233	995.8	1047.1	962.367
AT1G08000	133.133	138.6	113.5	118.667	130.9	119.7
AT1G08005	0.3	1	1	0.7	0.333333	0.333333
AT1G08010	460.9	490.833	457.4	377.367	408.7	458.167
AT1G08030	391.867	428.467	447.533	299.333	355.867	436.833
AT1G08035	1.6	1	2.6	0.333333	0.666667	0.333333
AT1G08040	307.6	480.6	537.533	351.2	337.8	446.567
AT1G08050	263.967	290.667	279.1	239.1	198.6	170.667
AT1G08060	461.133	470.7	495.633	423.733	440.5	419.467
AT1G08070	26.4667	20.0333	19.1667	33.7667	39.1	43.3667
AT1G08080	0	0.333333	0.333333	0.333333	0	0.333333
AT1G08090	18.8333	23.7	23.4	5.13333	4.4	3.3
AT1G08110	932.1	928.467	923.8	1154.9	1134.53	1075.43
AT1G08115	0	0	0.333333	0	0.333333	0
AT1G08120	1.9	0.666667	0.333333	1.03333	0.666667	0.666667
AT1G08125	241.8	248.1	244.3	238.667	239.833	239.667
AT1G08130	409.433	405.967	418.667	589.833	620.7	688.6
AT1G08140	0.666667	0	0.333333	0.333333	0.666667	0
AT1G08150	0	0	0.633333	0	0	0
AT1G08160	968.367	955.733	972.767	447.8	429.667	411.133
AT1G08165	1.56667	1	1.3	7.03333	4.06667	14.5333
AT1G08170	0.633333	0	1.3	0	1.33333	0.633333
AT1G08180	118.233	92.1667	87.9333	71.0333	62.2333	51.8667
AT1G08190	3616.8	3658.23	3713.33	3061.7	2900.03	2875.9
AT1G08200	6156.1	5991.07	6109.8	5437.37	5084.17	5086.67
AT1G08210	399.133	373	365.633	354.933	383.9	343.867
AT1G08220	96	112.867	112.6	136.5	148.033	163.833
AT1G08230	693.833	608.5	625.767	554.6	513.333	402.5
AT1G08250	284.4	314.767	278.8	247.033	238.233	204.933
AT1G08260	324.767	303.733	329.067	516.5	518.067	630.9
AT1G08270	21.2667	25.6667	19.8333	16.1667	16.7667	21.8333
AT1G08280	199.567	187.967	207.8	138.067	157.7	183.833
AT1G08290	42.1667	33.5333	35.3333	446.767	405.6	371.167
AT1G08300	54.4	49.6667	52.5	189.6	192.033	198.2
AT1G08310	56.2	43.0333	48.5667	13.4	11.8	13.2
AT1G08315	485.5	468.1	489.3	575.167	607.6	507.367
AT1G08320	457.333	403.8	418.467	109.4	128.1	96.4667
AT1G08340	165.4	148.933	177.633	249.5	272.433	253.967
AT1G08350	218.067	192.067	180.833	204.533	217.933	201.7
AT1G08360	1785.37	1853.73	1848.5	2661.17	2719	2930.33
AT1G08370	654.633	681.567	643.467	773.467	745.1	755.767
AT1G08380	791.667	841.767	703.333	6811.17	6529.73	5979.87
AT1G08390	16.5	16.3667	16.1667	39.0667	28.9	32.2333
AT1G08400	112.033	99.4333	110.967	163.4	142.333	151.067
AT1G08410	189.6	192.833	212.333	390.767	413.167	503.033
AT1G08420	2114.23	2162.57	2165.33	1640.4	1689.97	1604.5
AT1G08430	141.033	133.533	128.7	124.733	154.467	277.167
AT1G08440	0.3	0.666667	0.333333	1.4	3.73333	1.66667
AT1G08450	1118.07	1168.6	1214.6	960.9	948.333	983.433
AT1G08460	631	581.1	571.533	505.333	491.367	411.2
AT1G08465	24.9	26.7667	23.4	17.3667	9.36667	19.9667
AT1G08470	250.233	232.233	257.967	234.333	207	224.333
AT1G08480	1427.03	1372.2	1460.4	1135.27	1025.8	1108
AT1G08490	534.167	537.3	525.8	658.9	663.2	633.567
AT1G08500	1127.93	1134.9	1226.7	148.833	109.333	100.967
AT1G08510	4389.3	3981.13	3841.3	3341.93	2914	3124.47
AT1G08520	1055.53	1005.57	959.767	2803.9	2779.03	2700.1
AT1G08530	119.067	112.667	111.433	151.6	111.867	151.2
AT1G08540	321.367	340.7	261.9	865.433	794.667	824.433
AT1G08550	169.767	146.5	131.633	659.2	629.133	554.067
AT1G08560	578.767	553	592.833	480.3	436.1	532.767
AT1G08570	968.167	932.033	862.467	1003.77	848.933	790.233
AT1G08580	417.667	460.467	480.667	468.3	454.467	587.233
AT1G08590	245.767	207.533	163.067	88.6	98.9667	54.0333
AT1G08600	700.267	721.967	807.867	770.633	787.733	819.8
AT1G08610	83.7	76.2667	91.8667	121.933	141.767	175.7
AT1G08620	873.633	881.933	862.767	846.8	847.667	871.867
AT1G08630	162.2	122.667	93.9333	154.3	189.533	79.7667
AT1G08640	345.067	385.467	401.2	909.667	847.2	911.8
AT1G08650	1037.97	1331.07	1305.03	344.767	304.833	368.233
AT1G08660	503.867	540.367	539.833	479.867	506.333	523.3
AT1G08670	155.667	164	167.767	12.2667	16.2	21.5333
AT1G08680	1316.03	1223.33	1263.87	971.8	975.333	926
AT1G08700	585.2	591.233	574.367	443.8	434.2	475.433
AT1G08710	165.1	152.533	156.267	152.2	160.933	141.633
AT1G08720	637.8	616.667	586.033	1113.63	1227.1	1101.5
AT1G08730	1.9	3.63333	5.23333	5.4	5.06667	7.96667
AT1G08750	205.467	220.333	218.7	200.3	198.9	197.633
AT1G08760	660.267	703.833	724.067	397.233	351.5	362.4
AT1G08770	730.9	705.8	718.567	428.9	412.3	356.433
AT1G08780	184.4	198.533	186.6	238.967	224.167	229.6
AT1G08790	0	0	0.666667	0	0	0
AT1G08800	2706.1	2272.47	2442.53	2115.83	2529.3	1870.2
AT1G08810	31.9333	43.6333	35.0333	115.033	111.033	90.5667
AT1G08820	1236.37	1128.37	1088.47	1072.57	977.233	953.3
AT1G08830	4849.27	4749.23	4967.9	530.333	622.967	590
AT1G08840	69.4333	57.5667	61.2667	128.167	120.967	154.133
AT1G08845	54.9	67.6333	67.3667	86.7667	110.3	98.1333
AT1G08860	6.7	9.5	5.9	17.7667	18.8667	17.1
AT1G08880	1204.6	1185.6	1191.03	912.567	888.467	812.033
AT1G08890	1797.33	1742.87	1916.33	451.067	534.433	351.767
AT1G08900	160.867	149.133	152.267	328.433	351.7	299.133
AT1G08910	389.467	368.3	352.9	630.633	590.933	473.967
AT1G08920	2741.97	2928.33	2891	2092.07	1992.07	2020.63
AT1G08930	11832.2	9056.87	8565.03	18852.7	17171.7	14787.8
AT1G08940	569.633	526.8	513.667	909.233	960.333	742.6
AT1G08960	295.933	319.3	315.1	259.933	232.167	257.4
AT1G08970	834.333	802.1	831.233	603.333	562.8	596.333
AT1G08980	305	298.933	260.1	454	403.933	349.1
AT1G08985	0	0.633333	0	0	0	0
AT1G08990	104.2	86.2	88.8333	37.2667	50.2333	41.1667
AT1G09000	159.033	156	154.1	166.967	147.3	165.967
AT1G09010	1070.33	990.067	944.4	1249.27	1206.53	1125.07
AT1G09020	1133.2	1133.33	1128.1	880.267	904.433	906.967
AT1G09030	0	0	0	0	0.333333	0.333333
AT1G09040	60.3667	61.7333	41.4333	82.5	88.9333	83.6
AT1G09050	51.3667	50.4667	49.8667	84.2667	97.9333	87.1333
AT1G09060	598.6	633.267	591.667	842.733	823.133	847.967
AT1G09070	14771.2	14101.7	14947.9	16334.8	15895.7	15720.4
AT1G09080	10.5667	16.1	18.2	9.1	14.1333	5.93333
AT1G09090	229.267	222.7	255.967	143.5	198.667	135.8
AT1G09100	456.167	433.233	440.267	510.9	518.033	522.5
AT1G09130	598.467	639.833	592.333	2101.07	2084.37	1962.47
AT1G09140	1502.83	1515.33	1600.2	933.533	979.533	945.667
AT1G09150	444.633	480.967	458.933	475.233	464.867	456.933
AT1G09155	15.2	22.6667	20.1333	5.06667	10.0667	7.6
AT1G09157	2.2	3.6	4.26667	2.63333	3.7	3.36667
AT1G09160	839.6	895.167	901.767	743.633	710.333	796.167
AT1G09170	23.7333	19.3667	23.2	15.4667	28.9	18.3
AT1G09176	0.6	1.63333	1.3	1.73333	0	0.3
AT1G09180	14.4333	11.1667	12.5333	5.13333	5.7	1.96667
AT1G09190	40.6333	44.7667	39.5667	66.5667	68.5667	79.2
AT1G09195	200.467	171.633	190.233	82.0333	78.3667	61.6667
AT1G09200	695.567	744.167	748.367	745.5	647.533	803.933
AT1G09210	1537.07	1614.17	1554.23	2542.4	2406.37	2562.37
AT1G09220	21.9333	17.0333	16.9333	19.4333	24.4667	23.6667
AT1G09230	222.5	224.367	235.333	161.033	171.067	162.833
AT1G09240	6.46667	6.23333	6.9	4.06667	6.4	3.1
AT1G09250	934.167	1160.83	1330.17	511.233	698.833	841.4
AT1G09270	1759.17	1849.13	1834.4	1497.8	1497.3	1471.03
AT1G09280	442.5	399.167	391.5	336.333	341.433	338.333
AT1G09290	75.7333	74.1667	64.8333	81.4333	82.2	72.9333
AT1G09300	171.1	178.133	171	208	196.9	192.7
AT1G09310	43326.4	45457.1	48040	13167.2	11069.1	12721.5
AT1G09320	169.867	156.167	146.9	194	192.7	159.933
AT1G09330	752.9	791.933	767.533	670.367	649.367	617.533
AT1G09340	298.233	282.167	242.067	6191.5	5537.77	6093.13
AT1G09350	301.367	1097.77	1516.83	9.76667	76.5333	158.167
AT1G09360	0	0	0.666667	0	0	0
AT1G09370	0.3	0	0	0	0.333333	0.3
AT1G09380	19.1333	19.2667	24	17.2	21.9667	23.1333
AT1G09390	336.133	317.367	281	321.933	231.5	191.467
AT1G09400	11.2667	17.7333	12.2	8.66667	4.73333	9.36667
AT1G09410	22.6	16.4	24.2	31.5333	33.9	24.7
AT1G09415	121.733	122.833	116.633	306.633	307.367	307
AT1G09420	81.6	79.2	75.4	81.9333	87.7333	102.5
AT1G09430	2337.73	2245.93	2307.67	1495.1	1604	1339.83
AT1G09440	143.867	128.4	141.067	258.667	216.3	219.367
AT1G09450	48.3333	40.3667	38.3333	70.0667	69.5667	76.1
AT1G09460	1562.07	1307.47	1212.37	1137.77	1030.8	915.067
AT1G09470	24.9	20.3667	16.5333	104.8	100.433	91.9333
AT1G09480	161.7	166.333	149.6	187.133	208.567	198.267
AT1G09483	0.3	0	0	0.333333	0	0
AT1G09486	48.5333	60.3667	68.6333	20.9667	34.2333	24.7333
AT1G09490	332.2	319.067	319.4	403.367	403.7	375.767
AT1G09500	3.2	2.3	3.9	58.8667	57.5333	50.8
AT1G09510	0	0.333333	0	0	0.333333	0
AT1G09520	253.633	233.433	243.733	296.2	294.667	304.233
AT1G09530	2332	1372.77	1313.6	333.567	245.367	215
AT1G09540	275.433	260.4	286.4	20.9	31.3667	25.9
AT1G09560	5383.37	5081.53	5370.93	3372.67	3401.07	3085.1
AT1G09570	7091.27	7792.53	7131.73	2702.3	2958.03	2721.2
AT1G09575	216.333	272.933	266.3	557.467	567	571.367
AT1G09580	92.1	106.5	93.6333	205	174.567	176.067
AT1G09590	1474.27	1683.4	1646.57	3137.8	3106.67	3531.97
AT1G09600	12.8	13.7333	11.5333	13.9333	19.5333	18.3667
AT1G09610	44.5333	55.5	52.6	65.1	64.9667	57.3333
AT1G09620	2251.77	2262.13	2325.5	3152.4	3227.67	3318.6
AT1G09630	303.7	291.667	256.067	471.7	404.667	430.933
AT1G09640	4251.47	4420.13	4644.1	4928	5136.8	5425.03
AT1G09645	507.7	502.8	519.033	547.067	516.967	498.767
AT1G09650	8.43333	9.86667	4.56667	5.5	3.73333	4.7
AT1G09660	371.033	413.233	391.8	455.733	463.067	529.533
AT1G09665	0	0.666667	0.966667	0	0.666667	5.06667
AT1G09680	20.0667	21.0667	21.1333	40.2333	39.1333	53.6333
AT1G09690	2060.03	2286.77	2168.4	4013.53	3876.27	4356.67
AT1G09700	143.733	134.667	153.167	216.6	194.9	221.7
AT1G09710	160.9	135.233	124.467	81.8667	64.5667	60.4667
AT1G09720	0.3	0	0	0.333333	0.333333	0
AT1G09730	821.633	827.967	876.5	752.667	751.967	751.6
AT1G09740	2474.67	2347.03	2394.73	716.333	757.1	669.033
AT1G09750	761.4	1009.87	739.833	263.5	177.633	274.8
AT1G09760	455.833	444.567	441.3	559.2	541.633	630.3
AT1G09770	2286.1	2224.3	2228.87	2378.43	2458.43	2457.2
AT1G09780	2768.5	3127.5	3097.63	4705.03	4916.13	5234.73
AT1G09790	0	0.333333	0.666667	0.333333	0	0
AT1G09794	67.0667	73.5667	68.2333	61.0667	51.6667	49.7333
AT1G09795	207.9	221.467	196.9	1028.97	977.733	990.1
AT1G09800	53.1667	55.1667	47.8	57.8333	43.8667	81.7667
AT1G09810	170.767	177.9	201.367	242.533	247.167	267.5
AT1G09812	20.5	32.2	28.0333	15.6	15.1667	20.9333
AT1G09815	292.567	271.867	299.7	355.1	372.233	365.567
AT1G09820	51.7333	53.9	41.6333	73.7333	85.4	74.0333
AT1G09830	322.233	342.533	363.7	375.333	370.067	398.067
AT1G09840	1250.3	1399.57	1438.33	1045.7	1074.17	1174.83
AT1G09850	497.633	504.8	536	881.667	875.5	902
AT1G09860	8.3	5.23333	8.66667	5.43333	3.36667	3.93333
AT1G09870	842.833	866.467	914.967	525.967	560.833	507.533
AT1G09880	34.0333	40.4	39	28.8667	25.3333	31.1667
AT1G09890	169.067	164.567	164.667	146.667	132.967	163.467
AT1G09900	101.8	111.667	93.2667	125.8	138.8	154.533
AT1G09910	385.6	363.433	374.7	351.3	381.4	307.033
AT1G09920	792.067	735	744.933	511.933	473.667	449.7
AT1G09930	72.4333	49.0667	69.6	8.23333	9.4	8.5
AT1G09932	463.2	431.167	450.8	532.533	490.8	432.933
AT1G09940	1763.6	1651.37	1595.37	2695.8	2853.63	2586.67
AT1G09950	1171.53	1348.3	1525.63	961.167	997.367	1004.07
AT1G09960	385.833	353.933	384.333	377.567	332.233	344.867
AT1G09970	11953.7	11412.6	12093.3	20976.1	20549.5	16368.5
AT1G09980	776.067	875.2	880.7	617.767	659.467	737.6
AT1G09995	167.133	176.3	187.967	128.533	113.2	113.2
AT1G10000	23.8	14.7667	19.7333	20.6667	16.9	12.5667
AT1G10010	0	0.333333	0	0	0.333333	0.7
AT1G10020	577.1	565.767	675.667	598.3	511.567	547.9
AT1G10030	155.567	161.867	154.233	155.267	169.4	179.167
AT1G10040	173.767	262.967	240.4	71.9667	73.6667	70.2667
AT1G10050	455.133	459.2	466.333	392.967	383	370.467
AT1G10060	119.333	127.133	96.9	48	39.4	36.8667
AT1G10070	787.533	693.367	639.633	311.833	486.167	128.2
AT1G10090	2065.97	1887.7	1992.9	1248.6	1409.1	1162.37
AT1G10095	111.333	96.2667	105.1	84.2667	85.3667	85.0333
AT1G10100	0.633333	0	0.333333	0	0	0
AT1G10110	18	8.8	11.5333	6.63333	7.4	5.73333
AT1G10120	331.233	302.1	278.7	243.667	193.267	204.167
AT1G10130	1066.47	1082.27	1063.9	809.7	879.9	845.233
AT1G10140	1489.63	1355.1	1408.3	834.667	880.767	666.833
AT1G10150	291.133	279.667	266.9	508	480.9	497.5
AT1G10155	9.13333	6.26667	4.93333	3.53333	5.03333	3.36667
AT1G10160	272.2	206.367	202.5	146.567	150.233	124.833
AT1G10170	1237.8	1260.23	1258.3	1792.67	1970.53	1799.1
AT1G10180	380.6	398.467	366.1	437.067	397.567	416.667
AT1G10200	2509.57	2459.03	2276.7	1700.23	1448.07	1315.27
AT1G10210	189.2	153.733	131.3	117.067	86.6	89.6333
AT1G10220	22.2	12.5	13.8667	4.76667	1.36667	1
AT1G10230	60.1333	66.6667	73.9	123.133	107.7	134.567
AT1G10240	122.2	115	128.867	129.933	142	148.2
AT1G10260	0.3	0	0.333333	0	0	0
AT1G10270	233.467	271.467	290.467	347.2	370.1	443
AT1G10280	78.0667	90.1333	84.0333	47.2667	48.7667	42.1667
AT1G10290	1849.97	2029.07	2042.37	2289.8	2377.33	2366.4
AT1G10300	5.76667	4.9	3.6	25.8667	26.9667	31.7
AT1G10310	130.3	118.867	112.467	263.333	238.267	242.5
AT1G10320	400.933	385.567	380.9	281.667	262.367	252.6
AT1G10330	25.0667	19.4	33.3667	17.8	23.2	21.4
AT1G10340	193.967	138.033	161.267	110.7	95.7667	77.8667
AT1G10350	426.133	382.733	375.567	283.6	267.567	263.4
AT1G10360	144.433	135.667	136.7	271.3	230.4	233.567
AT1G10370	310.267	331.167	310.833	223.767	258.4	238.1
AT1G10380	354.133	426.5	433.967	209.667	200.8	189.467
AT1G10385	2.53333	0.666667	1	2.1	1	2.3
AT1G10390	2340.1	2359.2	2429.9	2332.7	2396.43	2564.1
AT1G10400	41.9	37.8	51.5	27.1667	31.6667	24.9
AT1G10410	1545.8	1633.83	1672.5	858.367	945.033	850.967
AT1G10417	52.4	50.5	43.0667	16.6667	18.8667	14.5667
AT1G10430	667.533	710.767	720	619.033	580.167	604.6
AT1G10450	652.8	629.967	693.167	691.633	725.9	693.7
AT1G10455	0.633333	4.9	6.93333	1.06667	0.666667	0.333333
AT1G10460	143.033	204.467	259.867	99.5	96.9333	101.133
AT1G10470	2260.73	2128.63	2256.13	1140.07	759.167	431.933
AT1G10480	467.9	336.367	284.033	165.567	68.1667	28.3667
AT1G10490	310	311.133	298.767	441.833	447.567	477.9
AT1G10500	261.633	240.133	248.633	577.333	544.767	536.467
AT1G10510	496.6	460.5	465.9	635.4	616.667	625.1
AT1G10520	43.5333	33.8333	37.7	46.1667	42.6333	48.2
AT1G10522	134.667	143.967	140.767	132.333	114.5	145.3
AT1G10530	21.0667	20.3333	14.2	16.7333	11.4333	11.7333
AT1G10540	10.8333	7.56667	11.5333	4.4	6.03333	8.8
AT1G10550	687.1	700.3	700.133	188.167	145.3	196.567
AT1G10560	269.967	263.8	265.8	36.1667	41.9	41.8667
AT1G10570	494.667	458.4	477.633	364.6	384.833	362.2
AT1G10580	831.933	838.3	825.067	912.9	975.167	936.067
AT1G10585	1.56667	1.66667	0.966667	23.5333	29.9333	20.6333
AT1G10586	0	0	0	0	0.333333	0.3
AT1G10590	1517.2	1495.43	1509.23	1308.2	1363.03	1299.47
AT1G10600	172.4	166.033	133.567	169.233	174.5	155.567
AT1G10610	171.467	161	157.133	56.3667	69.8667	63.3
AT1G10620	0	0.633333	0	0.366667	0	0.3
AT1G10630	1323.97	1418.1	1347.4	1452.9	1395.33	1448.93
AT1G10640	35.8	51.9667	44.1333	18.6667	13.1333	18.7333
AT1G10650	1098.37	1111.53	1134.37	568.667	596.333	589.4
AT1G10652	0	0	0.333333	0.333333	0	0
AT1G10657	2.86667	4.9	2.96667	75.9	70.7667	65.2667
AT1G10660	1037.43	985.833	1000.03	530.7	512.233	438.767
AT1G10670	4162.53	4188.23	4102.43	3211.07	3092.57	3258.73
AT1G10680	0.3	0	0.666667	8.16667	9.4	13.5333
AT1G10682	3800.4	3608.63	3596.77	423.933	340.767	260.5
AT1G10690	26	25.6	21.5333	17.9333	16.1667	13.2333
AT1G10700	501.7	500.4	553.633	671.767	641.633	580.267
AT1G10710	0.3	2.3	1.3	2.16667	6.36667	3.3
AT1G10720	1116.3	1032.9	1046.17	628.7	623.167	618.367
AT1G10730	289.533	290.267	317.467	158.367	166.633	139.067
AT1G10740	1190.67	1297.47	1480.87	1136.43	920.1	1320.17
AT1G10747	0	1	0	1.03333	0	0
AT1G10750	128.7	149.433	169.7	104.267	137.7	192.567
AT1G10760	1513.57	1490.7	1366.67	4092.83	3962.73	3430.7
AT1G10770	3.16667	1.3	1	40.5333	42.1667	29.2333
AT1G10780	89.7	78.2667	75.8	81.3667	78.2	89.5333
AT1G10790	21.8333	17.7	21.8	23.8	21.6333	29.9
AT1G10800	36.0667	27.9	28.5	22.5	27.0333	23.8667
AT1G10810	38.9667	35.4667	39.9667	79.9333	68.0667	73.7333
AT1G10820	380.9	372.2	386.533	232.9	232.967	241.233
AT1G10830	189.267	188.4	182.5	352.367	333.067	308.433
AT1G10840	1775.1	1760.67	1855.1	1670.37	1745.5	1754.53
AT1G10850	550.733	548.367	480.5	215.667	238.8	223.167
AT1G10865	539.1	498.267	516.533	308.2	324.3	277.2
AT1G10870	628.433	664.1	658.1	491	513.433	535.767
AT1G10880	0	0.333333	0.333333	0	0.666667	0
AT1G10890	1197.57	1198.83	1284.53	800.4	870.9	846.733
AT1G10900	716.267	1067.23	1175.17	730.1	843.767	936.433
AT1G10910	323.867	347.567	320.233	290.6	301.7	307.833
AT1G10920	69	51.8	60.6	168.6	178.167	175.767
AT1G10930	125.267	142.367	116.5	276.033	269.667	332.2
AT1G10940	1976.03	2038.9	2097.07	1177.4	1228.93	1260.4
AT1G10950	3235.1	3295.33	3205.57	3055.3	3124.7	3137.1
AT1G10960	1119.97	1174.4	864.867	2164.13	1775.83	2186.93
AT1G10970	186.333	170.833	177.2	337	350.667	264.133
AT1G10980	1.86667	0	0	1.4	1	1.63333
AT1G10990	44.8333	38.0667	45.4667	178.167	243.567	187.233
AT1G11000	778.767	1140.77	1260.87	210.033	336	467.633
AT1G11020	398.3	418.2	436.767	219.8	225.8	220.267
AT1G11040	0.933333	0.666667	0.333333	1.33333	0.666667	0.633333
AT1G11050	1012.97	932.233	964	1262.93	1268.97	1183.43
AT1G11060	375.6	358.567	352.9	320.6	311.833	334.267
AT1G11070	4.23333	2.96667	3.26667	40.6	37.9333	37.3
AT1G11080	7.96667	3.3	4.6	73.3333	59.1333	84.7333
AT1G11090	198.833	233.867	244.367	180.467	194.1	197.633
AT1G11100	116.133	101.567	123.967	62.1	71.9	59.0333
AT1G11110	0	0	0.333333	0	0.666667	0
AT1G11112	1.6	2.3	3.3	2.8	2.73333	7.7
AT1G11120	165.1	251.767	355.933	36.2	94.2667	124.833
AT1G11125	20.6667	59.3667	83.6333	47.2667	53.4	77.2667
AT1G11130	139.5	148.467	165.033	414.567	422.367	582.133
AT1G11150	79.7333	82.1333	78.5333	50.0333	43.7333	38.1
AT1G11160	28.7667	28.6333	32.7	73.1333	81.3667	81.4
AT1G11170	96.9333	114.333	113.8	42.6333	32.7667	42.7333
AT1G11175	206.467	175.933	133.633	106.767	84.5	79.1667
AT1G11180	205.167	205.367	230.267	280.033	315.667	210.633
AT1G11185	534	538.667	510.2	718.1	617.133	593.833
AT1G11190	194.467	186.9	210.8	146.733	145.067	146.4
AT1G11200	323.4	317.767	332.5	295.4	289.433	254
AT1G11210	1238.73	1231.23	1334.77	764.567	785.533	681.9
AT1G11220	37.1667	39.3	46.7	46.1667	40.4667	35.2
AT1G11240	323.867	347.467	338.067	463.067	484.933	521.8
AT1G11250	4.13333	3.6	2.96667	0.7	0.666667	0.3
AT1G11260	5022.3	3760.77	3607.8	4286.23	3992.57	3111.73
AT1G11265	0.333333	0.666667	0.966667	2	5.03333	3.3
AT1G11270	63.7667	59.1	54.5	76.7667	76.0333	65.9
AT1G11280	459.067	540.433	523.767	500.7	552.933	649.767
AT1G11290	25.4	31.8333	30.0333	80.7667	80.3	97.2667
AT1G11300	121.9	127.967	109.533	75.6667	71.7667	78.0667
AT1G11310	3100.63	2349.5	2183.63	2686.77	2720.07	2329.53
AT1G11320	68.7667	58.4667	65.0333	90.7333	88.9333	88.0667
AT1G11330	340.667	279.7	279.2	1258.87	1225.87	1076.37
AT1G11340	7.3	4.9	8.26667	18.6333	10.0667	19.6
AT1G11350	507.733	438.1	430.933	622.467	649.533	589.167
AT1G11360	975.6	1004.9	950.967	707.5	666.9	568.3
AT1G11362	4.76667	3.26667	2.96667	8.36667	6.33333	5.43333
AT1G11370	0.3	0.666667	0	0	0	0.333333
AT1G11380	325.033	289.6	267.633	516.467	409.633	398.1
AT1G11390	483.3	516.133	582.7	413.933	524.033	512.1
AT1G11400	542.733	591.8	604.5	366.5	451.667	468.1
AT1G11410	338.667	449.233	509.733	97.2	103.867	132.267
AT1G11420	58.9667	46.6	58.0667	111.733	112.1	118.433
AT1G11430	351.767	379.233	352.267	902.567	804.5	852.367
AT1G11440	270	316.1	312.933	143.633	132.667	152.033
AT1G11450	115.733	73.9667	72.9333	1247.27	1193.33	1185.83
AT1G11460	1.6	1	1.33333	66.6667	95.4667	73.3
AT1G11475	301.733	311.1	335.867	355.867	329.233	357.867
AT1G11480	1578.43	1565.27	1628.3	1537.33	1585.67	1495.23
AT1G11482	0.933333	1.3	1	1.4	1	0.666667
AT1G11490	5.2	3.93333	3.3	4.7	5.33333	3.66667
AT1G11500	22.5333	20.4333	20.4667	12.2333	9.43333	8.73333
AT1G11510	0	0	0.333333	0.366667	0	0
AT1G11530	416.533	375.7	384.1	459.3	438.2	387.433
AT1G11540	31.3	31.7	29.4	19.6	15.6	15.5667
AT1G11545	1811.9	2497.57	2418.03	427.9	530.867	688.6
AT1G11550	0	0	0.666667	0.366667	0	0.633333
AT1G11560	3.83333	2.3	2.33333	3.46667	1.33333	4
AT1G11570	28.3333	23.6	23.7333	25.9667	24.8333	22.1333
AT1G11572	1.86667	0	0.666667	1	3	0.3
AT1G11580	3828.43	3812.87	3530.53	11896.8	13089.6	9684.9
AT1G11590	0.933333	0	0.333333	0.7	0	0.966667
AT1G11592	232.8	233.733	247.033	121.667	125.833	104.533
AT1G11600	178.133	191.8	153.733	58.8667	43.4667	72.9667
AT1G11610	0	0	0	0	0	1.56667
AT1G11620	0.933333	0	0	0	0.333333	0
AT1G11630	132.467	160.133	150.4	191.4	202.633	194.933
AT1G11650	5467.7	5249.27	5389.33	5380.2	5533.17	5092.3
AT1G11655	1.9	1.33333	2.63333	0.666667	3.4	3.6
AT1G11660	746.867	813.133	867.833	950.8	959.9	972.7
AT1G11670	1910.87	1908.07	2044.5	2333	2821.57	2336.67
AT1G11680	1729.23	1708.47	1684.4	1413.23	1506.33	1378.1
AT1G11690	0.333333	0	0	0.333333	0	0.3
AT1G11700	143.467	100.367	81.0333	125.733	93.2333	79.7667
AT1G11710	61.9	65.3333	78.6	62.2667	71.7	83.2333
AT1G11720	156.467	177.5	165.9	495.733	451.633	546.667
AT1G11730	23.9	23.2667	38.7333	50.6667	46.1	60.9667
AT1G11735	35.4667	109.667	148.967	6.1	8.83333	21.6
AT1G11740	165.667	273.1	282.533	19.6667	21.8667	30.0333
AT1G11750	528.033	497.133	427.333	1048.43	1023.4	1049.2
AT1G11755	127.633	129.467	130.4	127.1	113.533	104
AT1G11760	115.233	113.467	103.067	94.5	99.0667	86.2333
AT1G11770	0	0	0	0	0.666667	0
AT1G11780	191.3	215	223.167	288	274.333	282.5
AT1G11785	4.83333	4.93333	3.63333	2.66667	4.3	3.66667
AT1G11790	195.133	187.533	210.7	302.167	318.333	375.8
AT1G11800	154.2	146.233	144.267	123.767	110.333	107.367
AT1G11810	1.3	0.666667	0.666667	0	0.333333	0.333333
AT1G11820	556.4	591.633	561.933	575.733	598.467	627.5
AT1G11840	5916.5	5745.4	6108.43	15575.4	14377.8	14674
AT1G11850	19.6	24.2667	18.2333	13.9667	8.66667	16.0667
AT1G11860	2513.37	2519.9	2138.6	6671.2	5923.23	6571.8
AT1G11870	229.167	214.733	213.367	344.667	344.367	346.8
AT1G11880	131.167	129.167	122.033	100.5	92.8667	89.9667
AT1G11890	756.833	794.6	809	978.033	965.8	986.467
AT1G11900	41.4	37.1	26.1	34.1667	35.5667	23.7333
AT1G11905	304.967	321.167	341.7	257.233	270.467	257.667
AT1G11910	11985.9	11236.5	11444.2	5697.37	5505.2	5028.67
AT1G11915	54.0333	57.3667	60	35.4333	31.6667	30.5667
AT1G11920	1.9	1.96667	1.3	6.2	4.36667	2.33333
AT1G11925	4.9	4.93333	4.9	47.3667	47.9667	32.8333
AT1G11930	875.933	890.767	886.7	710.267	679.733	661.1
AT1G11940	92.7	91.3	107.367	151.533	157.833	141.633
AT1G11950	168.5	170	177.1	164.2	162.733	151.767
AT1G11960	2171.43	2207.7	2494.17	1861.77	1939	1921.9
AT1G11990	0	0.333333	1	1.76667	2.4	0.666667
AT1G12000	1718.57	1743.63	1679.33	2140.23	2068.23	2299.77
AT1G12010	386.433	369.967	361.533	85.6667	89.3333	69.3667
AT1G12013	0	0.666667	0.633333	1.43333	2.03333	1.63333
AT1G12020	100.333	77.2333	82.5333	102.467	96.1333	126.867
AT1G12030	1.9	2.96667	3.63333	4.63333	9.06667	6.8
AT1G12040	92	77.9333	91.6667	185.9	243.5	180.8
AT1G12050	533	543.467	491.033	687.133	629.267	616.733
AT1G12060	67.9	72.8	79.2333	105.733	87.7667	113.667
AT1G12064	7.16667	6.53333	5.56667	5.43333	5.03333	3.56667
AT1G12070	39.0667	53.5	61.4	10.6333	14.5	27.6667
AT1G12080	16294	18902.2	17739.6	422.067	644.9	968.733
AT1G12090	25232.7	23380.4	23107.7	4912.7	3899.77	2938.43
AT1G12100	2.7	0.333333	0.966667	1.76667	3.66667	5.33333
AT1G12110	8265.53	7318	7995	3522.07	2550.07	2324.3
AT1G12120	868.2	847.967	814.967	1033.1	987.867	954.933
AT1G12130	10.5	6.83333	5.16667	5.5	5.73333	1.66667
AT1G12140	918.6	941.733	921.6	1373.83	1254.4	1266.9
AT1G12150	8.2	8.86667	11	5.5	11.7667	5.86667
AT1G12160	135.867	130.5	137.967	81.8	93.8667	97.4333
AT1G12180	0.3	0	0	0.366667	0	0.666667
AT1G12200	630.1	419.767	363.833	2968.27	2233.63	1457.97
AT1G12210	51.1667	44.3667	46.0333	79.4667	83.7	74.8333
AT1G12211	0.3	1.63333	0.666667	0	0.333333	0
AT1G12220	99.8667	100.133	101.1	202.033	210.1	244.267
AT1G12230	1123.23	1168.17	1027.8	1601.13	1682.33	1549.77
AT1G12240	2426.3	2215.77	1987.13	6678.03	5822.6	5119.3
AT1G12244	47.1333	47.4667	50.5333	63.9333	57.8	60.5
AT1G12250	62.8667	77.3333	49.4667	524.567	474.833	480.2
AT1G12260	163.833	163.433	157.433	206.567	179.033	187.7
AT1G12270	914.867	896.1	926.133	1034.67	1076.9	1082.13
AT1G12280	57.3333	69.0667	80.5333	179.6	183.6	153.533
AT1G12290	96.8333	106.167	112.433	106.833	102.167	105.333
AT1G12300	42.6	45.4333	39.3333	42.9333	46.0333	48
AT1G12310	2097.37	2101.3	2005.8	1532.13	1416.7	1296.8
AT1G12320	120.533	74.4333	67.1333	150.467	108.133	97.3
AT1G12330	219.967	241.3	209.067	98.2667	77.9333	70
AT1G12350	333.067	321.667	345.433	186.367	184.233	171.6
AT1G12360	1902.73	1882.37	1906.27	1521.3	1572.77	1540.1
AT1G12370	34.0667	30.6667	28.1333	138.333	122.133	139.6
AT1G12380	100.033	85.1	83.1	251.2	199.7	244.367
AT1G12390	270.8	265.533	247.533	210.133	187.9	188.7
AT1G12400	192.733	230.1	222.433	153.5	149.5	157.1
AT1G12410	821.567	839.5	714.567	1450.6	1345.9	1367.97
AT1G12420	308.7	258.933	251.833	83.5667	93.6667	93.2667
AT1G12430	575.1	455.467	476.1	794.8	659.667	780.633
AT1G12440	1876.4	1712.3	1720.63	1364.2	1258.2	1157.67
AT1G12450	225.433	211.333	189.467	273.367	231.867	230.6
AT1G12460	129.233	167.767	171.7	74.6333	79.7667	92.0667
AT1G12470	1000.7	1016.67	1028	1138.6	1199.77	1198.47
AT1G12480	3.9	5.93333	5.9	13	18.1	16.4667
AT1G12490	3.2	1	0.633333	0.666667	2.03333	1.26667
AT1G12500	1053.9	1053.8	971	1472.43	1326.4	1354.83
AT1G12520	860.1	807.7	851.933	329.767	352.733	303
AT1G12530	202.167	185.867	177.5	198.567	191.1	175.933
AT1G12540	0.3	0	0	2.36667	1.7	0.633333
AT1G12550	50.6333	50.3667	50.2333	107.933	92.6333	96.3333
AT1G12560	61.7667	43.3	48.3	79.6667	132.733	112.867
AT1G12570	0.633333	2.3	3.6	2.03333	2.03333	10.3667
AT1G12580	1347.67	1889.57	2327.43	1291.87	1500.57	1805.5
AT1G12600	24.3	25.9333	25.4667	11.6333	10.4333	14.0667
AT1G12610	933.1	934.9	1036.7	1845.5	1711.7	2034.73
AT1G12620	90.1	99.6667	93.1333	112.767	106.433	111.833
AT1G12630	1.6	1.33333	2.66667	14.2667	17.5333	15.0667
AT1G12640	807.1	841.633	869.4	582.833	622.7	595.5
AT1G12650	313.033	363.133	373.967	356.333	394.2	426.767
AT1G12663	0	0.966667	0	0.733333	0	0
AT1G12665	2.63333	0.333333	1.33333	0	0	0
AT1G12669	2.53333	1.96667	2.3	0	0.333333	0.333333
AT1G12670	2.9	6.2	5.6	1	1	0
AT1G12672	5.3	3.23333	4.9	1.7	1	1
AT1G12680	426.567	380.567	385.633	296.7	293.3	279.933
AT1G12700	48.9333	40.7333	43.6333	27.8	32.6	41.1667
AT1G12710	209.6	180.433	162.7	182.033	160.267	139.567
AT1G12730	107.2	75.4333	84.0667	90.9333	86.4667	84.8
AT1G12740	268.4	226.533	192.067	76.9333	122.433	116.633
AT1G12750	329.067	347.467	353.167	215.533	220.6	231.133
AT1G12760	1971.2	1957.07	2106.27	1294.8	1360.43	1288.1
AT1G12770	246.733	248.433	234.167	564.5	505.9	554.7
AT1G12775	37.5	27.9333	37.6333	22.3	29.3	31.7
AT1G12780	4229.73	3934.8	3732.4	3465.63	3536.03	2508.83
AT1G12790	128.7	123.467	102.4	119.2	127.367	103.167
AT1G12800	516.733	480.833	415	1714.97	1688.87	1811.23
AT1G12805	7.13333	1.3	2.93333	16.1	19.3333	8.7
AT1G12810	925.367	881.467	852.9	448.667	421.2	354.2
AT1G12820	558.733	597.333	571.967	500.533	422.2	448.433
AT1G12830	141	163.133	165.033	219.2	240.767	244.933
AT1G12840	2455.33	2537.9	2553.13	2603.13	2560.1	2536.5
AT1G12845	205.267	254.8	256.267	14.6333	15.7333	17.5
AT1G12850	871.633	958.6	916	619.267	613.1	588.6
AT1G12855	0.633333	0	0.633333	0	0	0
AT1G12860	88.4333	88.7667	78.6	44.5667	52.7333	75.6667
AT1G12870	0	0.333333	0	2.7	2.03333	1
AT1G12880	128.867	138.7	142.733	144.633	130.3	153.267
AT1G12890	2.6	4.23333	1.96667	11.5333	12.1667	11.3333
AT1G12900	600.8	604.9	496.067	5467.03	5220	5471.33
AT1G12910	446.433	472.7	453.1	589.067	577.1	537.833
AT1G12920	1365.43	1383.97	1452.07	1461	1557.07	1595.03
AT1G12930	460.5	418.633	393.567	355.967	365.333	327.967
AT1G12940	0.633333	0	0	1	0	0.333333
AT1G12950	191.067	156.8	148.267	431.433	504.033	365.567
AT1G12970	270.333	269.6	237.533	270.133	230.567	235.033
AT1G12980	2.63333	2.33333	2	1.33333	2.63333	7.2
AT1G12990	657.967	748.2	833.033	461.733	441.267	448.167
AT1G13000	478.333	507.433	521.1	397.467	467.133	442.1
AT1G13020	795.167	789.1	768.533	861.667	854.6	833.633
AT1G13030	76.2667	81.1667	77.4	133.233	143.333	150.3
AT1G13040	56.6	52.8333	44.1333	93.1333	105.1	111.8
AT1G13050	63.9667	58.6	60.2667	78.3	98.8667	94.6333
AT1G13060	1397.87	1383.87	1381.03	1613.77	1535.83	1549.27
AT1G13070	0.633333	1.63333	1	0.666667	0.333333	0
AT1G13080	545.833	363.233	390.9	247.1	191.867	158.733
AT1G13090	410.967	369.133	361.467	407.6	314.667	305.567
AT1G13100	659.233	649.8	623	419.467	397.9	325.2
AT1G13110	5352.7	5003.3	4480.47	4836.87	5231.53	3580.67
AT1G13120	359.167	359.9	332.8	339.8	367.767	349.267
AT1G13130	210	208.8	197.667	230.067	204.2	219.967
AT1G13140	21.3	16.1	23.2	13.9333	22.1667	17.6667
AT1G13145	35.3667	33.7667	35.2	18.2667	19.9667	20.6333
AT1G13150	20.9	22.0333	22.1333	11.4	11.0667	12.8667
AT1G13160	435.033	472.533	506.233	761	875.633	940.233
AT1G13170	552.467	577.4	558.033	614.167	595.633	648.267
AT1G13180	244.967	243.833	226.7	325.467	348.467	354.5
AT1G13190	790.433	776	826.667	1172.3	1207.73	1097.83
AT1G13195	345.167	375.133	470.633	311.1	373.533	329.667
AT1G13200	0.666667	1	0.633333	1	1.03333	0.333333
AT1G13210	6107.5	6242.6	5966.3	6799.43	8037.6	7412.6
AT1G13220	279.3	298.5	282.367	498.133	563.9	586.2
AT1G13230	3.23333	1.96667	4.3	0.666667	3.36667	3.96667
AT1G13245	303.333	1233.3	1930.27	571.7	1109.43	1660.57
AT1G13250	212	272.8	296.233	229.9	231.5	371.233
AT1G13260	4564.37	4336.83	4154.2	3127.63	2483.6	2369.13
AT1G13270	141.433	135.5	119.467	510.667	559.2	543.167
AT1G13280	1187.97	1457.63	1491.1	724.933	811.333	875.367
AT1G13300	171.933	123.967	128.833	480.767	694.233	543.1
AT1G13310	1.96667	1.93333	1.33333	0.333333	1	0
AT1G13320	1199.5	1223.83	1199.97	1204.33	1210.07	1208.03
AT1G13330	16.7667	16.4	16.1667	18.8333	23.2333	26.5333
AT1G13340	177.3	201.033	189.933	150.133	143.767	136.767
AT1G13350	746.1	749.667	725.133	599.067	645.6	631.3
AT1G13360	1285.63	1511.17	1512.37	1215.77	1564.1	1408.27
AT1G13370	1.53333	2.3	1	3.1	6.06667	2.06667
AT1G13380	402.267	468.167	460.633	759.333	758.767	915.8
AT1G13390	1238.7	1482.97	1513.83	1447.43	1513.87	1533.8
AT1G13400	0	2.96667	1.3	2.73333	0	0
AT1G13410	35.8333	27.9	30.9	50.3333	52.7667	60.5333
AT1G13420	887.133	580.967	648.933	62.9333	73.8	37.2333
AT1G13430	696.767	982.067	1072.97	57.9667	98.7	173.1
AT1G13440	9092.1	9210.63	9190.77	16421.8	16234.4	16872
AT1G13448	23.1	28.1667	30.3	12.1333	11.1333	11.6333
AT1G13450	562.5	514.467	529.9	472.8	545.567	557.033
AT1G13460	475.2	491.833	501.7	300.2	341	319.133
AT1G13470	0	0.333333	0	1.36667	0.666667	0.7
AT1G13480	31.8667	24.9667	25.8	68.0333	56.4667	59.7
AT1G13490	0.333333	0.666667	0.333333	0.7	0	0
AT1G13500	18.9333	11.1667	12.2	9.96667	6.4	5.9
AT1G13510	36.8	27.9	24.5	22.5333	22.9667	20.8333
AT1G13520	60.3667	42.3	52.4667	52.8667	50.3	59.7667
AT1G13530	85.9667	64.1333	71.0667	20.7	29.7333	24.1667
AT1G13540	26.0333	25.5667	26.4667	15.6333	19.1667	19.8333
AT1G13550	27.6333	23.6	32	5.13333	4.73333	7.63333
AT1G13560	1591.87	1632.03	1752.2	1821.87	1761.1	1831.93
AT1G13570	300.2	264.633	274	262.233	245.933	234
AT1G13580	212.233	217.133	189.033	159.833	137.967	152.333
AT1G13590	194.967	179.3	177.667	29.0333	46.2	47.2333
AT1G13600	22.6	20.6333	15.3	26.2667	34.0667	35.9667
AT1G13609	0.933333	2.3	1.63333	14.1	9.4	13.3
AT1G13610	0	0.333333	0.333333	45.7	30.7667	27.3
AT1G13620	0.633333	1.96667	1.3	10.6667	11.8	14.8667
AT1G13630	40.3	44.1	43.2333	63.6667	73.9	71.3667
AT1G13635	154.233	142.867	137.067	195.867	180.7	190.133
AT1G13640	1029.63	903.433	856.467	1720.93	1625.77	1599.57
AT1G13650	0	1.3	0.333333	6.4	8.43333	11.7667
AT1G13660	0	0.333333	0	0	0.333333	0.3
AT1G13670	435.867	540.867	476.967	591.8	750.433	1129.5
AT1G13680	0.333333	0.333333	0.666667	0	0.333333	2
AT1G13690	178.933	181	183.133	241.133	230.467	261.3
AT1G13700	306.333	210.6	228.833	774.233	622	614.7
AT1G13710	87.0667	108.4	69.9667	54.4333	23.7333	48.1667
AT1G13730	301.167	328	302.567	421.167	430.567	504.167
AT1G13740	320.6	340.8	294.6	270.667	237.533	196.6
AT1G13750	97.5333	91.9	96.3667	73.3	72.1333	69.6
AT1G13770	143.167	136	149.6	136.6	127.8	151.3
AT1G13780	83.3	70.0667	73.7333	90.6	86.4	80.3
AT1G13790	18.6	32.1333	19.5	75.7	58.1	82.6
AT1G13800	19.5333	15.4	12.5333	30.5667	41.7667	31.2
AT1G13810	63.4667	72.6333	65.1333	116.367	127.833	131.733
AT1G13820	127.133	119.933	113.167	656.1	633.967	625.7
AT1G13830	116.6	91.4667	91.3	37.3667	34.1	28.3
AT1G13860	320.3	333.3	342.567	202.533	215.167	236.433
AT1G13870	247.267	238.3	259.633	216.667	221.6	229.367
AT1G13880	644.933	647.4	683.2	719.167	668.433	681.533
AT1G13890	0.633333	0.633333	0.333333	0	0	0
AT1G13900	566.233	503.6	499.967	538.567	598.333	465.833
AT1G13910	98.5	79.4667	98.9667	35.1333	43.9667	52.0667
AT1G13920	175.1	178.633	165.567	136.233	134.367	122.567
AT1G13930	4216.6	4225.4	4088.53	7098.53	5994.97	5929.47
AT1G13940	365.633	342.533	325.4	333.267	354.533	413.133
AT1G13950	212.633	197.8	233.7	171.5	179.833	159.233
AT1G13960	968.067	918.9	946.2	454.7	556.733	454.367
AT1G13970	59.7333	78.0667	77.4	63.1667	77.5	74.1
AT1G13980	953.467	961.4	950.767	1154.43	1241.37	1166.8
AT1G13990	331.833	380.833	388.533	564.9	594.367	540.3
AT1G14000	1603.5	1532.53	1632.43	1429.3	1525.53	1444.7
AT1G14010	533.433	594.533	591.167	588.4	563.267	556.767
AT1G14020	376.333	378.2	365	352.4	356.6	369.367
AT1G14030	101.633	88.4333	70.8333	302.133	296.2	284.3
AT1G14040	1069	847.633	843.933	2366.8	2550.5	1959.53
AT1G14048	0	0	0.333333	0	0.333333	0.333333
AT1G14060	158.233	187.167	179	363.733	403.467	435.433
AT1G14070	163.267	166.9	168.5	108.367	113.133	111.233
AT1G14071	1.93333	3	1.3	1.03333	2.36667	2.7
AT1G14080	62.5333	70.1333	77.4667	45.7667	62.7	51.5
AT1G14090	81.8667	67.7	74.8	106.3	108.733	100.467
AT1G14120	1140.87	1215.63	1376.13	976.567	987.133	926.567
AT1G14130	395.533	444.167	505.233	274	279.5	294.933
AT1G14140	136.767	131.367	118.667	227.267	230.133	221.133
AT1G14150	27.0333	33.2	19.5667	454.3	396.133	410.5
AT1G14160	150.6	143.167	127.1	28.1	27.9333	32.8
AT1G14170	640.967	617.7	626.9	1017.7	996.667	982.267
AT1G14180	44.5667	44.7	41.2667	86.8333	82	97.0667
AT1G14182	10.6667	7.86667	11.2333	0.733333	2	3.3
AT1G14185	31.6	84.2667	116.233	54	71.9	124.633
AT1G14190	78.0333	114	157.133	145.2	207.6	317.767
AT1G14200	116.5	116.267	91.7333	200.067	175.5	172.833
AT1G14205	12.4	10.5333	7.96667	18.1	21.5	21.2
AT1G14210	1343.53	1253.97	1338.4	2064.63	2315.63	2523.9
AT1G14220	7.93333	8.53333	9.23333	18.7	20.2333	18.4
AT1G14230	633.367	602.433	573.733	460.133	470.867	467.5
AT1G14240	468.933	406.167	519.167	270.733	277.167	260.2
AT1G14250	0	0	0	8.66667	19.7	16.3333
AT1G14260	23.9333	24.9333	31.7667	68.4333	60.5667	58.1
AT1G14270	123.767	109.033	110.033	407.833	371.733	381.567
AT1G14280	549.767	772.033	952.967	194	308.133	438.833
AT1G14290	729.3	730.267	685.2	737.967	755.9	626.433
AT1G14300	151.833	156.533	171.567	355.2	375.1	368.267
AT1G14310	89.2	87.3	82.3333	147.133	152.067	140.667
AT1G14315	0	0.666667	0	0.333333	0.333333	0
AT1G14320	4726.17	4879.83	5036.4	6533.17	6458.17	6766.8
AT1G14330	791.233	830.9	864.2	1096.37	1104.13	1022.13
AT1G14340	262.167	248.933	265.567	253.067	224.367	222.133
AT1G14345	122.467	110.067	89.2333	410.3	333.067	384.033
AT1G14350	633.467	634.1	645.867	118.533	124.667	142.867
AT1G14360	228.333	243.733	204.333	453.433	385.333	380.1
AT1G14370	1273.5	1022.33	991.767	849.1	864.867	686.567
AT1G14380	937.1	880.5	879.767	934.433	861.3	775.267
AT1G14390	73.5667	110.233	116.433	44.5333	62.2333	80.0333
AT1G14400	2834	2736.27	2898.73	1798.73	1768.07	1729.77
AT1G14410	82.6333	105.467	99.0667	220.667	204.933	268.267
AT1G14420	0	0	0.633333	7.2	6.43333	7.6
AT1G14430	29.4667	30.2667	33.7333	240.067	243.033	318.5
AT1G14440	67.6667	76.9	50.3	26.2667	16.0667	32.6333
AT1G14450	624.467	679.2	652.567	851.533	782.367	769.433
AT1G14455	2.86667	2.96667	3.3	1.03333	1	2.63333
AT1G14460	395.467	462.633	385.4	231.733	219.3	243.6
AT1G14470	29.7667	24.2667	29.3	48.4333	44.8333	52.5
AT1G14480	735.967	672.467	695.6	645.2	715.133	678.5
AT1G14490	7.06667	10.9	4.63333	4.33333	7.1	7.3
AT1G14500	1.93333	40.7333	79.2667	2.36667	3.7	5.93333
AT1G14510	698.933	721.3	732.567	926.4	937.567	966.2
AT1G14518	0.666667	1.3	0	0.333333	0.333333	0
AT1G14520	336.233	319.1	365.367	266.833	239.733	237
AT1G14530	144.9	143.5	146.667	132.267	133.8	125.9
AT1G14540	396.833	330.833	219.1	340.2	346.1	247.233
AT1G14550	18.5667	13.0667	11.9333	11.1	13.4333	13.2667
AT1G14560	397.267	434.7	431.167	335.733	378.667	394.933
AT1G14570	1238.97	1193.57	1170.23	982.767	1004.2	1004.87
AT1G14580	408.767	344.467	353.533	161.8	150.767	136.333
AT1G14590	160.933	175.167	155.6	122.4	135.033	119.9
AT1G14600	27.9333	21.9667	23.4333	13.6667	13.4667	17.1667
AT1G14610	2016.6	2101.93	2148.47	2503.17	2637.67	2842.8
AT1G14620	156.833	182.467	160.267	400.8	386.467	432.233
AT1G14630	26.9333	53.2667	43.7	155.9	138.5	193
AT1G14640	69.2667	60.5	68.5333	240.4	274.3	207.333
AT1G14642	6.4	5.93333	8.6	22.9333	25.5333	22.3667
AT1G14650	1385.8	1422.33	1480.47	1453.37	1541.9	1506.17
AT1G14660	110.467	95	93.8333	90.1667	91.9333	91.3
AT1G14670	2718.73	3030.63	2908.53	2978.93	2980.97	2996.97
AT1G14680	19.3667	17.7667	19.1333	26.9667	24.5	21.5333
AT1G14685	618.767	632.467	576.1	654.633	655.1	718.467
AT1G14686	5.8	2.3	4.56667	1.36667	2.36667	2.23333
AT1G14687	26.6333	25.7	22.2333	48.5333	36.3	28.7333
AT1G14688	0	0.666667	0.666667	1.1	0	0
AT1G14690	668.133	831.933	796.233	734	894.7	825.933
AT1G14700	533.333	633.3	644.767	354.7	391.2	403.933
AT1G14710	1760.07	1792.6	1864.7	2100.17	2181.77	2394.87
AT1G14720	1420.3	1425.27	1468	1778.23	1656.13	1682.77
AT1G14730	880.433	920.967	944.833	361.033	381.667	391.067
AT1G14740	3142.9	3105.8	3118.9	3219.4	3314.17	2980.83
AT1G14750	18.3333	12.7667	14.1667	31.7	26.3333	34.5667
AT1G14755	0	0.666667	1	0	0	0
AT1G14760	10.4667	8.23333	4.56667	3	2.7	4.33333
AT1G14770	87.4667	80.8333	81.5333	87.2667	87.0667	84.7667
AT1G14780	840.9	714.933	711.133	1451.43	1319.07	798.767
AT1G14790	362.267	336.267	314.467	392.1	333.167	327.2
AT1G14810	522.467	564.233	535.667	1716.67	1956.03	1813.67
AT1G14820	158.233	173.133	176.067	228.167	198.2	209.433
AT1G14830	2419.13	2590.67	2494.8	2554.7	2609.53	2648.37
AT1G14840	182.533	216.767	162.7	154.033	144.433	131.1
AT1G14850	645.967	613.3	611.267	831	943.133	923.367
AT1G14860	411.2	317.1	338.467	83.7333	117.933	80.8333
AT1G14870	2442.5	2108.47	2054.57	1362.87	1712.77	1255.57
AT1G14880	0	0	0	0	0	1.03333
AT1G14890	1712.47	1536.3	1449.8	731.733	873.633	593.167
AT1G14900	1185.27	1134.03	1062.63	746.367	693.867	754.133
AT1G14910	949.8	922.433	922.533	787.1	866.233	801.733
AT1G14920	412.467	460.433	525.1	361.933	453.9	503.667
AT1G14930	42.9333	42.1	29.9	5.8	2.06667	1.73333
AT1G14940	2.56667	0.333333	5.46667	0	0	0
AT1G14950	23.7667	3.6	57.9	1.33333	0	0.333333
AT1G14960	88.2333	68.5333	82.1	29.7333	28.6333	25.3333
AT1G14970	90.4333	95.9667	88.2667	129.067	106.967	128.633
AT1G14980	717.467	808.4	726.067	1413.43	1355.77	1567.57
AT1G14990	159.5	165.967	160.667	190.933	156.367	173.767
AT1G15000	221.6	214.033	214.8	328.067	327.833	329.833
AT1G15002	3.2	0.966667	1.66667	4.13333	2.7	2.33333
AT1G15010	1781.2	1435.93	1514.57	1730.83	1742.1	1348.53
AT1G15015	0.933333	1.33333	0.633333	0.733333	0.666667	0
AT1G15020	669.533	641.067	673.5	557.3	597.033	512.367
AT1G15030	426.2	379.667	385.133	653.067	725.5	654.567
AT1G15040	1362.43	839.7	910.133	501.6	649.733	376.333
AT1G15050	19.8	17.0333	22.8333	2.43333	1.33333	5.76667
AT1G15060	369.433	356.433	342.2	329.7	316.567	330.033
AT1G15080	64	49.5667	65.6667	94.8	87.3	86.8333
AT1G15100	1166.03	764	642.233	390.467	369.033	225.733
AT1G15110	500.7	524.767	531.7	367.633	414.4	377.567
AT1G15120	1241	1255.93	1277.33	928.067	894.033	841.733
AT1G15125	65.2667	50.5	56.4	3745.07	5114.13	3513.5
AT1G15130	2724.4	2697.8	2840.9	2443.17	2496.7	2250.57
AT1G15140	322.5	370.533	376.533	1437.73	1446.03	1419.07
AT1G15150	0	0.333333	0.333333	45.8	45.5333	49.0667
AT1G15160	56.5	57.1	50.5667	87.7	78.4667	83.1667
AT1G15165	52.7	55.1333	50.7333	77.0333	80.9667	62.0333
AT1G15170	181.367	180.633	178.567	463.1	439.6	385.667
AT1G15175	6.36667	10.1667	10.8333	10.5667	11.1333	11.9667
AT1G15180	197.6	192.6	180.6	293.667	309.333	286.5
AT1G15190	38.3	45.3333	46.1333	21.1	20.8	19.3667
AT1G15200	845.367	862.233	869.3	850.833	921	948
AT1G15210	3580.6	3801.87	3752.8	2840.77	2526.13	2019.63
AT1G15215	59.8333	77.9333	59.9333	74.8	65.6	69.8667
AT1G15220	150.633	143.3	150.3	123.1	116.433	101.333
AT1G15230	400.067	331.367	324.7	307.8	288.033	270.067
AT1G15240	960.833	902	978.3	728.133	746.4	771.467
AT1G15250	145	164	163.433	222.933	214.4	235.2
AT1G15260	44.3667	66.2	51.4333	17.5333	18.7333	18.1333
AT1G15270	1747.33	1809.3	1809.47	1389.47	1301.53	1360.3
AT1G15280	1308.07	1290.2	1341.93	1097.83	1128.73	1157.07
AT1G15290	483.8	470	367.6	1525.87	1543.37	1484.7
AT1G15300	109.333	113.933	110.7	83.7333	91.0667	83.9
AT1G15310	234.167	243.267	254	228.433	203	224.233
AT1G15320	1.23333	0.633333	1	0	1.33333	0.966667
AT1G15330	33.4333	24.3667	27.7	40.7667	24.1	21.7
AT1G15340	1360.9	1354.83	1357.2	1293.93	1323.47	1368.93
AT1G15350	2627.7	2567.13	2580.17	666.867	725.7	651.9
AT1G15360	1.9	1.66667	1	0.666667	0.666667	0.333333
AT1G15370	679.633	684.3	712.867	702.267	670.767	682.4
AT1G15380	270.433	267.233	293.767	98.6667	102.6	48.1
AT1G15385	2.9	1.63333	5.33333	3.36667	1.33333	4.8
AT1G15390	102.933	114.6	118.4	275.533	273.7	266.367
AT1G15400	1585.63	1482.17	1591.33	1016.03	1018.77	903.567
AT1G15405	10.2333	11.4667	12.2	11.2333	16.0333	12.2333
AT1G15410	428.833	555.867	597.667	373.567	423.367	520.933
AT1G15415	4.5	7.9	4.56667	8.33333	11.0667	9.03333
AT1G15420	328.433	323.333	350.567	440.4	461.867	500.533
AT1G15430	492.133	501.833	540.233	546.9	567.833	542.067
AT1G15440	350.933	380	414.033	620.133	704.333	792.6
AT1G15450	0	0	0	0	0.666667	0
AT1G15460	19.1667	18.0667	19.5	17.7333	12.8333	20.8
AT1G15470	205.3	197.367	181.767	218.467	198.4	219.267
AT1G15480	78.3	73.5333	75.9667	209.167	206.633	260.1
AT1G15490	358.8	329.567	301.833	231.4	256.967	243.267
AT1G15500	2648.27	2561.5	2315.27	3553.27	3717.47	3397.3
AT1G15510	50.4	48.0667	41.4667	120.333	97.2	112.9
AT1G15520	96.5667	165.067	191.633	141.6	278.233	371.6
AT1G15530	615.7	573	535.733	602.1	662.933	595.733
AT1G15540	2	2.93333	0.666667	0	2	0.966667
AT1G15550	204.1	271.333	225.367	146.033	191.367	255.633
AT1G15560	0.633333	0	0.333333	0	0	0.333333
AT1G15570	107.467	218.4	379.367	220.233	265.433	325.1
AT1G15580	110.967	2085.43	4742.97	158.467	584.1	2570.67
AT1G15590	0.3	2.3	4.9	0	0	0.3
AT1G15600	1.9	7.9	33.3667	0	0	0
AT1G15610	0.633333	1.3	1.3	0	0	0
AT1G15620	0.6	6.56667	3.63333	0	0	0
AT1G15630	17.2	23.5	23.8667	7.13333	7.76667	9.3
AT1G15640	224.133	179.1	232.033	40.2	43.0333	53.4
AT1G15660	334.467	301.633	330.8	285	273.133	322.1
AT1G15670	2684.47	3054.47	3192.67	2052.03	1855.3	1683.93
AT1G15680	0	0	0.333333	1.03333	0	0.3
AT1G15690	9534.43	9363.6	9010.83	14179.7	13251	13848.8
AT1G15700	92.5333	87.9667	86.3	82.8333	71.7	79.8
AT1G15710	267.967	271.133	269.433	277.833	282.467	274.733
AT1G15720	41.5333	46.9667	46.2333	63.4333	59.8	62.9333
AT1G15730	221.933	208.333	204.267	510.867	536.633	537.367
AT1G15740	1469.1	1171.43	1161.6	842.967	801.533	695.067
AT1G15750	4232.13	4466.4	4388.77	4213.17	4236.7	4452.13
AT1G15760	48.3	73.2333	74.4333	61.9333	67.7	107.433
AT1G15770	0.633333	0	2	1.36667	2.36667	3.56667
AT1G15772	4.8	2.33333	1.63333	3.66667	3.03333	4
AT1G15780	1510.47	1563.47	1543.53	1246.4	1297.03	1242.43
AT1G15790	84.9333	94.8667	97.4	87.8	76.3333	68.0333
AT1G15800	165.2	155.6	146.067	244.167	254.467	194.533
AT1G15810	483.133	516.067	485.6	565.667	562.267	598.367
AT1G15820	1539	1567.2	1346.77	6513.6	6147.53	6098.53
AT1G15825	5.2	3.96667	5.66667	14.2	13.7667	13.1667
AT1G15830	15.3667	11.7667	14.9	38.5	33.9333	25.5667
AT1G15840	26	16.7333	15.8	17.3333	17.0667	10.7
AT1G15860	703.433	708.7	759.733	533.967	545.933	502.433
AT1G15870	9.53333	10.8667	12.1667	18.8333	20.8667	27.6
AT1G15880	607.8	626.1	580.433	549.067	515.867	464
AT1G15885	11.8	17.7	14.7667	21.8667	17.2	29.4
AT1G15890	127.2	111.9	142.133	199	200.133	221.133
AT1G15900	20.9	18.0333	18.0333	18.4333	22.0667	19.0333
AT1G15910	232.5	229.567	199.467	408	396.533	409.533
AT1G15920	359.767	344.9	347.167	270.767	263.133	257.533
AT1G15930	1228.9	1220.27	1230.13	2301.13	2297.8	2423.37
AT1G15940	375.033	355.9	350.367	518.2	562.333	608.5
AT1G15950	2576.17	2603.97	2604.87	2126.03	2029.53	2011.6
AT1G15960	60.6333	49.9333	72.8	210.7	193.2	202.667
AT1G15970	203.833	232.3	246.267	215.133	215.833	257.933
AT1G15980	72.8	83.5667	52.1	907.2	863	931
AT1G15990	0.6	0	0.333333	1.03333	1	0
AT1G16000	111.4	130.5	109.1	192.733	178.933	197.367
AT1G16010	941.067	935.733	946.667	671.8	654.267	595.9
AT1G16020	364.1	366.8	383.233	319.167	290.867	324.967
AT1G16030	160.933	185.633	126.9	121.9	134.3	109.233
AT1G16040	237.333	253.6	264.9	181.833	166.7	190.267
AT1G16060	133.667	127.933	127.867	268.9	281.333	240.367
AT1G16070	13.5	21.6667	16.2333	82.7333	79	101.233
AT1G16080	218.533	204.6	176.7	904.8	835.033	852.833
AT1G16090	27.9	32.2333	33.1	15.8667	14.8333	19.5333
AT1G16110	229.3	204.5	234.433	125.1	102.833	122.867
AT1G16120	70.4667	58.7667	81.7	11.2333	17.2333	10.4333
AT1G16130	828.667	681.6	688.733	438.067	374.967	306.967
AT1G16140	13.4667	14.1333	17.8	3.46667	3.73333	1.96667
AT1G16150	28.2667	34.6333	36.0667	6.13333	7.76667	12.5
AT1G16160	34.6667	33.6333	32.6	4.36667	7.33333	4.33333
AT1G16170	429.133	432.967	442.3	383.467	345.367	313.5
AT1G16180	4763.03	4531.8	4634.17	2839.37	2928.2	2517.3
AT1G16190	625.633	674.667	630.267	608.833	642.233	677.7
AT1G16210	1347.87	1334.9	1354.33	1270.97	1204.9	1111.17
AT1G16220	39.2667	50.3333	56.7333	119.733	123.533	144.467
AT1G16225	1.26667	0	1.63333	2.8	0	1.36667
AT1G16230	1.3	0.333333	0.666667	0.366667	1.66667	1.26667
AT1G16240	1663.9	1619.7	1681.93	1269.13	1300.37	1134.13
AT1G16250	257.133	227.133	223.3	206.8	213.767	190.9
AT1G16260	82.2667	94.9	80.2667	209.633	191.633	181.8
AT1G16270	731	746.6	764.5	871.167	859.833	964.6
AT1G16280	208.167	213.7	226.533	156.967	195.533	176.133
AT1G16290	0.933333	0	0.333333	0.333333	0	1
AT1G16300	199.7	222.4	213.833	227.1	219.233	240.8
AT1G16310	156.1	139.9	139.033	89.6667	89.2667	75.9667
AT1G16320	256.733	287.2	281.033	618.933	570.2	588.8
AT1G16330	107.233	107.2	101.2	122.433	116.933	160.567
AT1G16340	137.4	137.233	136.767	188.4	186.1	198.967
AT1G16350	712.6	690.133	651.067	1072.07	1035.07	1029.6
AT1G16360	6.76667	8.16667	12.8667	4.06667	4.3	7.56667
AT1G16370	3690.77	3230.9	3650.97	987.333	861.767	800.933
AT1G16380	2.23333	2.6	4.26667	1	1.36667	1.26667
AT1G16390	729.2	637.033	569.8	980.733	663.467	690.3
AT1G16400	26.3333	20.8333	21.1667	2003.33	2033.2	1706.17
AT1G16410	0.3	0	0	2605.87	2638.57	2773.7
AT1G16420	5.76667	6.26667	5.96667	26.2333	21.8667	21.3667
AT1G16430	42.8	39.1667	40	55.2	50.1333	58.3
AT1G16440	19.0333	18.7	23.4667	24.3	29.9333	31.9333
AT1G16445	21.0333	18.7667	15.8	47.1667	40.6333	40.3667
AT1G16460	917.033	900.933	908.633	1459.87	1398	1307.1
AT1G16470	869.6	879.067	863.833	823.5	811.833	824.767
AT1G16480	46.5333	39.2	47.3	99.4333	88.8333	84.1333
AT1G16489	3.9	3.96667	2.96667	0.666667	0.333333	0.666667
AT1G16490	10.9	11.5333	9.7	3.13333	3.03333	6.66667
AT1G16500	42.8667	47.6667	45.3333	39.1667	34.0667	28.4333
AT1G16510	107.5	139.633	164.467	104.333	98.6667	114.967
AT1G16515	23	30.5667	33.9667	12.7	7.4	7.5
AT1G16520	349.267	345.2	335.8	566.833	504.133	611.1
AT1G16530	31.0333	19.4333	11.8333	129.067	67.6667	49.6
AT1G16540	388.667	348.167	395.433	220.333	238.467	209.8
AT1G16550	65.4	66.8667	64.3333	81.7667	90.9667	88.1333
AT1G16560	1054.07	1072.77	1112	864.867	813.067	829.567
AT1G16570	277.167	305.467	291.867	309.967	329.4	310.267
AT1G16590	66.7667	62.0333	57.1	59.5333	52.7	43.0333
AT1G16610	781.033	824.433	802.667	1013.3	1018.23	1104.57
AT1G16630	190.833	184.3	185.733	197.7	194.967	225.033
AT1G16635	7.03333	4.86667	4.63333	3.7	4.06667	6.53333
AT1G16640	6.1	5.6	3.26667	51.8	39.4	41.1333
AT1G16650	155.033	121.967	139.8	226.133	237.167	200.167
AT1G16670	739.067	707.367	730.8	579.9	616.1	568.633
AT1G16680	333.1	274.8	243.767	258.267	257.533	251.933
AT1G16690	136	128.267	124.6	140.567	116.633	122.667
AT1G16700	865.4	887.9	892.267	1014.6	979.733	987.733
AT1G16705	1.9	1.33333	1	3.06667	0	2.86667
AT1G16710	1111.97	1137.27	1185.67	869.4	873.7	882.933
AT1G16720	508.5	505.8	436.5	2113	1915.47	1923.27
AT1G16730	21.5333	15.3667	16.8333	117.067	107.5	119.467
AT1G16740	309.433	304.3	325.867	443.533	445.633	448.267
AT1G16750	94	113.633	111.533	79.0667	78.1333	105.9
AT1G16770	2.63333	3.3	4.56667	1.06667	5.7	2.93333
AT1G16780	200.2	213.033	177.7	183.933	177.767	174.133
AT1G16790	79.2667	85.4	69.0667	63.0667	66.4333	74.2333
AT1G16800	226.467	218	251	276.6	284.767	276.3
AT1G16810	841.633	871.167	812.633	670.633	673.9	672.9
AT1G16820	48.7667	47.3333	55.4667	56.7	56.4333	44
AT1G16825	51.5333	50.0333	47.5	53.1333	54.0333	49.3667
AT1G16830	21.6667	24.3667	22.7667	48.4	51.3333	44.4
AT1G16840	764.167	725.267	656.633	827.667	905.033	695.1
AT1G16850	1613.67	1516.47	1637.13	175.9	174.3	120.333
AT1G16870	373.267	409.433	370.233	648.6	667.867	657.6
AT1G16880	1442.63	1364.2	1353.23	2373.63	2224	2342.1
AT1G16890	1633.7	1653.27	1620.23	1245.27	1304.47	1248.97
AT1G16900	349.267	342.333	314.067	307.8	287.2	302.567
AT1G16905	14.4333	11.7333	9.86667	6.1	13.1333	6.3
AT1G16910	0	0.333333	0	0.333333	0.333333	0.3
AT1G16916	37	37.8	42.6	29	30.5667	27.8
AT1G16920	571.233	611.567	575.5	559.467	540.1	589.533
AT1G16930	329.133	339.933	358.5	108.3	107.3	105.2
AT1G16960	11.5667	15.8	12.3333	18	15.7333	21.1333
AT1G16970	319.733	326.067	339.467	215.533	238.633	243.167
AT1G16980	0	0	0.666667	0	1.03333	0.7
AT1G17010	0	0.333333	0	0.333333	1.36667	0
AT1G17020	299.4	269.6	274.033	313.2	336.433	266.433
AT1G17030	66.3667	61.6667	64.4667	48.9667	62.9333	58.2333
AT1G17040	113.967	95.2333	111.4	75.8667	64.0667	59.0667
AT1G17050	231.5	283.833	293.867	328.833	301.4	362.067
AT1G17060	1293.4	1701.87	1916.53	284.733	329.033	331.233
AT1G17070	248.733	279.333	258.7	342.3	370.1	369.767
AT1G17080	2287.87	2114.37	2152.1	777.667	727.3	695.4
AT1G17090	135.267	108.333	100.7	69.4333	53.8	52.9
AT1G17100	260.233	249.6	173.167	1180.53	976.067	1164.2
AT1G17110	811.867	825.133	836.467	914.067	1020.23	978.233
AT1G17120	540.367	569.967	581.267	454.367	430.533	419.767
AT1G17130	647.467	640.133	635.767	578.467	646.3	673.567
AT1G17140	578.533	654	638.533	251.6	260.5	340.767
AT1G17145	439.067	360.133	365.133	264.3	291.6	232.433
AT1G17147	504.767	378.667	368.167	169.467	194.067	173.2
AT1G17160	412.433	439.333	414.133	393.333	392.633	367.633
AT1G17170	504.933	543.733	707.433	453.533	507.933	450.033
AT1G17180	117.1	139.733	162.9	117.267	165	216
AT1G17190	2410.83	1793.73	1875.43	481.533	449.733	321.267
AT1G17200	368.3	346.1	322.667	435.7	359.433	312.133
AT1G17210	1666.43	1557.9	1606.07	1479.67	1486.27	1437.27
AT1G17220	842.567	856.967	694.367	2947.6	2854.53	2825
AT1G17230	190.767	173.867	179.133	182.6	179.233	157.2
AT1G17235	3.16667	0.966667	1.33333	1.83333	1.36667	1.7
AT1G17240	19.9333	22.5333	24.1	5.16667	6.03333	9.63333
AT1G17255	14.6	22.3	23.5333	12.7333	15.1	12.9333
AT1G17260	36	40.7667	42.0333	40.7333	39.6333	42.7
AT1G17270	156.4	130.4	153.7	143.933	135.333	119.1
AT1G17275	0	0.333333	0	0	0.333333	0
AT1G17280	755.967	743.667	756.533	551	545	521.167
AT1G17285	4.5	6.53333	3.6	18.3	20.5333	12.9333
AT1G17290	3673.4	3244.63	3321.23	6995.83	8180.83	5809.93
AT1G17300	13.5333	9.16667	8.6	10.9	9.76667	8.16667
AT1G17310	6.93333	6.53333	5.3	2.36667	4.03333	4.4
AT1G17330	420.367	391.633	402.1	268.133	288.867	266.3
AT1G17340	1622.13	1453.37	1613.43	1170.17	1279.83	1117.9
AT1G17345	622.867	647.067	774.067	317.567	288.467	219.9
AT1G17350	178.3	177.2	176.5	193.533	225.167	193.067
AT1G17360	1032.47	1114.93	1098.53	1136.63	991	999.3
AT1G17370	1290.9	1272.03	1294.63	1411.93	1449.33	1480
AT1G17380	713.433	735.467	677.4	2754.1	2464.53	2571.8
AT1G17390	0.333333	0	0	1.1	1.03333	0.633333
AT1G17400	66.0667	66.6667	71.0667	31.8333	20.4	17.4333
AT1G17410	124.933	112.033	99.4333	107.633	90.5	92.7667
AT1G17420	1237.17	1389.47	1220.07	5448.93	5389.7	5043.53
AT1G17430	432.433	426.067	381.533	261.467	266.033	244.733
AT1G17440	990.167	1053.27	1071.87	769.033	755.833	790.533
AT1G17450	539.633	524.833	561.433	358.167	382.133	359.067
AT1G17455	112	128.067	109.633	96.1667	87.4333	73.7
AT1G17460	96.8333	95.0667	108.233	51.4333	60.2667	71.9667
AT1G17470	1412.27	1313.07	1344.53	1325.3	1308.9	1253
AT1G17480	81.8333	76.6	88.6	136.967	129.467	147.667
AT1G17490	97.7	114.5	114.467	103.567	102.9	108.533
AT1G17500	1762.07	1979.57	2152.93	1441.1	1513.97	1447.23
AT1G17510	123.833	127.867	131.7	119.2	109.733	111.467
AT1G17520	253.7	255.233	262	280.833	272.667	252.933
AT1G17530	355.067	351.3	329.767	325.767	329.767	300.4
AT1G17540	1.56667	1.63333	1.3	2.03333	1	1.66667
AT1G17550	1060.5	1134.2	1189.83	702.2	707.933	716.333
AT1G17560	39.6333	52.2667	45.5	114.133	99.2667	118.4
AT1G17580	920.333	908.567	980.867	869.967	947.467	934.033
AT1G17590	133.033	117.767	130.533	121	108.167	101.733
AT1G17600	14.3	14.4	17.9	42	32.6333	29.6667
AT1G17610	1.6	0.333333	1	6.13333	7.06667	6.66667
AT1G17615	0	0	0	0	1.03333	0
AT1G17620	6618.1	7167.07	8046.43	6990.13	6535.27	6709.53
AT1G17630	32.5667	34.1667	35.4	63.9667	56.7667	59.6
AT1G17640	117.6	101.933	115.367	68.5	63.2333	62.4
AT1G17650	106.733	100.2	98.2	280.7	248.4	252.5
AT1G17665	115.9	92.7333	110.233	176.267	196.1	155.767
AT1G17680	563.6	524.367	517.133	436.8	453.167	436.767
AT1G17690	359	404.7	389.867	403.633	490.033	516.667
AT1G17700	157.633	178.333	172.3	38.7667	42.5333	62.8333
AT1G17710	25.2333	20.5667	19.2333	11.7	10.3667	5.56667
AT1G17720	1638.6	1639.6	1649.03	1608.43	1647.27	1664.5
AT1G17730	787.967	758.3	773.267	672.167	609.6	585.7
AT1G17744	0.633333	0.333333	0	1.03333	1	2
AT1G17745	1967.47	1733.2	1675.47	2150.07	1897.93	1873.53
AT1G17750	837.733	763.1	724.2	974.367	924.367	836.133
AT1G17760	404.833	406.133	384.2	418.633	423.467	379.833
AT1G17780	326.567	312.9	321.533	159.167	155.6	144.067
AT1G17790	181.3	178.9	173.633	152.467	170.733	159.3
AT1G17810	50.8667	42.6667	58.7667	11.1	7.43333	12.2667
AT1G17820	276.133	306	297.633	205.1	201.167	210.733
AT1G17830	196.567	206.4	232.733	103.167	102.567	91.3
AT1G17840	3887.33	4062.27	3742.83	1264.6	1068.43	1104.33
AT1G17850	50.7667	54.8333	45.1333	125.3	143.433	140.667
AT1G17860	3298.13	3418.3	3452.97	853.3	887.7	924.6
AT1G17870	97.9667	103.133	113.333	56.9667	78.8667	92.1667
AT1G17880	1607.7	1661.8	1646.33	2400.67	2422.9	2626.97
AT1G17890	646.433	682.9	685.8	657.067	695.833	654.967
AT1G17920	49.3333	53.5667	51.4333	32.9333	19.1667	28.1667
AT1G17930	138.467	130.4	117.167	136.967	154.067	152.667
AT1G17940	676.733	599.6	531.3	183.967	142.3	128.433
AT1G17950	15.9667	13.8667	9	12.5667	17.1333	12.9333
AT1G17960	272.2	243.333	244.6	16.0667	19.3	17.0667
AT1G17970	357.1	290.933	238.233	243.767	232.3	160.367
AT1G17980	1407.07	1451.27	1457.83	1926.57	2151.63	2241.5
AT1G17990	1.6	3.66667	3.63333	12.0667	15.4	24.8667
AT1G18000	1.23333	1	0.666667	3.4	3.7	6.9
AT1G18010	0.933333	1.33333	1	3.1	4.36667	7
AT1G18020	0.966667	1.66667	2.96667	12.4333	13.3667	22.4333
AT1G18030	213.233	263.067	248.633	397.267	446.967	523.867
AT1G18040	179.367	174.367	173.5	228.233	209	236.1
AT1G18050	0.333333	0	0	0.733333	1.33333	0
AT1G18060	62.4	58.4	43.3667	806.4	760.2	764.367
AT1G18070	2539.3	2616	2608.3	2944.37	3004.03	3054.83
AT1G18075	24.2333	12.8	12.2	20.3	24.6	15.5
AT1G18080	3604.03	3929.13	3781.1	5930.63	5906.7	6277.77
AT1G18090	46.5	41.7667	41.8	36.7	36.9	44.3333
AT1G18100	228.867	252.6	237.633	24.3667	22.6	16.4667
AT1G18120	0.933333	1.63333	0.333333	0	0	0.333333
AT1G18140	414.3	352.033	295.1	140.067	110.533	79.4333
AT1G18150	1389.87	1403.07	1371.57	864.433	858.1	812.167
AT1G18160	1378.6	1370.07	1361.73	1011.03	1106.77	1011.17
AT1G18170	146.7	150.4	149.3	283.833	269.667	283.6
AT1G18180	30.6667	26.3	33.6667	66.3333	68.2667	60.8
AT1G18190	492.133	440.767	449.233	516.7	557.333	534.033
AT1G18191	2.96667	3.26667	7.63333	0.7	3.03333	0.633333
AT1G18200	633.933	551.733	671.033	194.4	219.033	224.9
AT1G18210	2923.93	2885.03	2852.93	4305.27	4198.77	4030.83
AT1G18220	1.3	2.3	1	0.666667	0.333333	0
AT1G18250	201.1	212.433	199.4	734.3	695.833	840.5
AT1G18260	1339.37	1312.63	1286.33	1120.1	1129.37	1048.87
AT1G18265	6	3.3	7.33333	56.2667	50.5333	53.3667
AT1G18270	3139.37	2791.63	2811.8	1810.37	2108.77	1564.17
AT1G18280	63.0333	45.6667	41.3667	14.5	10.7667	6.3
AT1G18290	345.233	282.467	338.6	114.033	97.8667	71.3
AT1G18300	3403.63	3118.53	3543.9	3864.2	3749.7	4125.23
AT1G18310	4.4	4.6	3.23333	1.76667	3.7	2.2
AT1G18320	18.2333	18.8	13.1667	25.8	30.3333	41.3
AT1G18330	523.167	438.767	320.733	204.833	138.367	135.333
AT1G18335	90.8667	99.1333	89.9667	81.5	67.6333	71.5333
AT1G18340	132.033	123.733	99.7333	107.467	116.233	118.867
AT1G18350	7.3	5.53333	6.2	34.1333	20.8	11.7333
AT1G18360	185.533	215.833	216.367	108.267	92.5	107.267
AT1G18370	295	289.433	321.8	350.8	338.167	455.867
AT1G18382	2.3	1.63333	2.33333	0	0	0.966667
AT1G18390	655.333	653.233	606.267	483.4	574.5	496.133
AT1G18400	522.067	1606.83	2011.5	940.167	1363.07	1809.03
AT1G18410	1.56667	1	3.93333	9.36667	11.1333	14.8
AT1G18415	0	0	0.966667	0.366667	0.333333	1
AT1G18440	122.667	131.5	103.467	175.367	203.3	195.867
AT1G18450	595.2	556.533	549.433	648.433	669.633	683.4
AT1G18460	490.967	628.9	640.5	639.533	736.567	879.833
AT1G18470	1602.57	1245.93	1196.33	1232.6	1203.73	840.967
AT1G18480	352.967	377	428.667	528.933	597.667	640.4
AT1G18485	41.1667	50.7	41.2667	242.167	237.467	231.467
AT1G18490	129.567	133.4	138.567	157.233	158.167	194.267
AT1G18500	1336.4	1241.43	1284.6	2192.13	2435.2	2123.4
AT1G18510	0	0.633333	1.63333	1.06667	0.333333	1
AT1G18520	0.3	0	0.333333	0	0	0
AT1G18530	0	0.333333	0	0	1	0.633333
AT1G18540	2440.67	2598	2615.73	4818.7	4787.47	5271.7
AT1G18550	164.967	184.7	187.7	117.5	106.1	125.3
AT1G18560	96.7	110.333	89.8	110.133	116.433	112.067
AT1G18570	4224.73	3115.87	2826.77	2768.93	2502.9	2124.3
AT1G18580	566.467	610.167	613.1	556.033	536.733	556.5
AT1G18590	467.967	511.067	484.2	1573.43	1389.63	1205
AT1G18600	231.233	233.033	217.133	271.867	287.7	265.367
AT1G18610	156.367	190.767	232.6	149.333	170.4	223.767
AT1G18620	442.433	477.833	517	424.167	469.567	596.667
AT1G18630	120.767	129.033	111.6	187.867	177.467	193.5
AT1G18640	253.767	280.933	268.333	391.8	427.533	402.767
AT1G18650	134.567	141.067	118.9	133.067	133.933	153.1
AT1G18660	610.233	632.433	632.733	911.733	858.833	895.333
AT1G18670	273.633	429.7	446.167	499.467	557.3	748.867
AT1G18680	50.3667	45.2667	48.3667	82.1667	64.5333	64.8333
AT1G18690	146.467	171.633	167.033	145.133	158.267	149
AT1G18700	683.433	653.9	654.833	694.433	724.667	705
AT1G18710	60.1	74.6333	73.2667	174.267	172.267	208.167
AT1G18720	2077.63	2009.03	1987.7	1666.4	1617.57	1533
AT1G18730	26.9667	26.9	16.2	330	284.267	308.4
AT1G18740	5532.6	5324.6	5567.87	4392.53	4286.17	4323.93
AT1G18745	44.9333	60	63.2333	57.8	60.3333	80.3333
AT1G18750	60.7667	72.6	74.1667	68.3667	73.2333	66.1333
AT1G18773	38.0667	26.2667	22.0667	9.96667	15.1333	7.23333
AT1G18790	1.3	0	0	0	0	0
AT1G18800	441.067	457.333	446.9	586.333	563.567	677.067
AT1G18810	13.3667	12.4	6.6	51	51.1	45.6667
AT1G18830	81.0333	78.3	76.8	3.16667	1.66667	5.03333
AT1G18835	54.2667	252.467	282.3	9.16667	13.1	30.7667
AT1G18840	657.7	686.2	614.1	642.033	572.467	638.4
AT1G18850	110.167	149.367	154.1	180.967	240.133	264.033
AT1G18860	56.0333	55.0667	60.4333	20	29.2333	23.6
AT1G18870	372	428.5	513.6	113.433	94.7	125
AT1G18880	1003.77	772.333	581.633	1031.43	808.933	663.333
AT1G18890	1908.63	1938.53	1872.27	1353.87	1389.77	1312.73
AT1G18900	323.533	342.467	376.9	577.9	665.5	671.6
AT1G18910	820.633	810.6	835.767	355.267	412.833	399.733
AT1G18940	61.2667	64.3	62.2667	35.1667	39	40.0333
AT1G18950	538.7	559.433	507.733	618.1	615.867	630.1
AT1G18960	4.53333	5.63333	9.3	1.03333	3.7	3.03333
AT1G18970	49.6667	43	48.5667	11.3333	9.16667	12.1333
AT1G18980	267.733	278.5	315.567	120.767	145.267	151.033
AT1G18990	8.36667	6.2	6.6	10	11.0333	7.06667
AT1G19000	3269.2	2861	2620.63	2926.47	2594.53	2243.6
AT1G19010	107.667	93.1	88.6667	121	106.933	113
AT1G19020	3056.33	2689.1	2750.03	1725.6	1856.13	1497.9
AT1G19025	126.6	105.9	119.1	71.3333	67.5667	66.8
AT1G19030	1.23333	1.33333	1	1.73333	2	0
AT1G19040	2.2	1.96667	6.26667	1.7	2.36667	0.333333
AT1G19050	207.3	483.7	568.533	470.067	434.467	211.167
AT1G19070	2.23333	2.66667	1.66667	2.73333	0.666667	1.93333
AT1G19080	72.3667	84.6333	89.0667	79.5	83.1	84.3667
AT1G19100	186.767	188.267	188.067	149.867	140.8	161.967
AT1G19110	2180.5	2189.6	2314.9	847.067	865.333	808.167
AT1G19115	0.633333	1.63333	2.9	2.76667	4.06667	3.7
AT1G19120	282.733	316.033	287.667	276.833	280.967	285.5
AT1G19130	589.267	600.567	637.767	710.933	685.033	616.767
AT1G19140	171.1	155.4	155.1	411.267	396.833	401.233
AT1G19150	88.5	88.4333	73.2667	254.867	207.933	286.1
AT1G19160	0.333333	1	0.666667	0	0.333333	0.966667
AT1G19170	379.2	339.833	332.633	315.367	304.167	287.3
AT1G19180	15467.5	15786	16976.9	10697.5	10532.1	10902.3
AT1G19190	50.0333	51.1667	46.6	33.3667	50.8333	35.2
AT1G19200	55.5333	55.9	60.8	28.6667	34.2667	24.4333
AT1G19210	389.767	327.867	341.967	153.333	175.4	179.033
AT1G19220	867.967	1311.93	1600.8	895.067	1154.27	1478.1
AT1G19230	192.867	397.733	470.167	187.267	251.1	275.333
AT1G19240	124.733	148.433	141.9	142.4	147.633	127.367
AT1G19250	23.6	14.4333	24.2	5.96667	3.73333	2.4
AT1G19270	507.033	499.9	471.267	494.4	530.767	464.533
AT1G19290	108.3	100.733	97.3	152.733	146.733	143.3
AT1G19300	604.867	596.8	609.4	801.167	833.633	801.267
AT1G19310	256.933	244.767	228.5	270.3	292.767	254.133
AT1G19320	0.6	1	0.666667	2.46667	1.66667	3.7
AT1G19330	320.2	284.733	253.9	218.833	185.533	179.7
AT1G19340	72.3	47.1333	47.1667	47.1	43.8667	43.9
AT1G19350	4890.17	3542.83	2994.67	4023.33	3611.03	3456.33
AT1G19360	1040.6	1075.67	1070.43	1210.03	1218.7	1116.27
AT1G19370	520.1	549.233	532.867	517.067	527.533	483.6
AT1G19371	0.3	1.3	1.63333	0.333333	0.333333	0.666667
AT1G19373	1.93333	2.26667	1.96667	3.13333	1	1.33333
AT1G19376	2.23333	0.333333	1.96667	2.73333	1.7	2.96667
AT1G19380	2683.33	2639.2	2397	2642.7	2639	2251.43
AT1G19390	3.13333	4.6	6.23333	0	0.333333	0.333333
AT1G19394	17.9	17.1	20.8333	6.06667	11.4333	11.1667
AT1G19396	15.0333	10.2	16.5333	11.2667	6.33333	10.1667
AT1G19397	55.6	46.6333	58.9	29.6	35.5667	23.8333
AT1G19400	939.133	840.9	854.9	248.833	281.867	192.833
AT1G19410	2.53333	3.6	1.96667	3.23333	3	4.26667
AT1G19415	4.86667	5.26667	4.26667	3.03333	1.66667	1.33333
AT1G19420	18.1667	16.0667	14.8333	10.4667	19.9	8.93333
AT1G19430	676.633	695.867	680.067	622.467	605.1	655.467
AT1G19440	530.867	610.333	636.067	408.2	404.567	408.733
AT1G19450	6834.03	4682.07	4993.53	681.8	725.167	531.8
AT1G19460	2.93333	0.666667	1.63333	0.333333	0	0
AT1G19464	2.53333	0.333333	1	2.76667	3.4	3.93333
AT1G19470	0.3	0	0	0	0	0.966667
AT1G19480	152.6	160.7	143.233	104.4	101.4	97.5333
AT1G19485	427.767	412	425.167	260.067	287.233	272.6
AT1G19490	67.3333	52.2667	66.3	24.5333	29.0333	29.0333
AT1G19500	0	0.666667	0.666667	0	1.03333	0
AT1G19510	22.5667	24.2667	11.8333	0	0.333333	0
AT1G19520	417.867	431	434.8	684.1	678.133	727.467
AT1G19530	4961.1	4454.77	4159.1	453.367	804.7	373.667
AT1G19540	663.767	740.333	665	519.167	824.8	571.433
AT1G19550	12.5333	8.9	14.9667	38.4	75.5333	54.7667
AT1G19560	14.4667	17.0667	17.5333	13.9	12.4333	7.16667
AT1G19570	8950.23	8656.4	9093.1	12860.1	11799.9	11475.5
AT1G19580	466.3	488.733	514.5	604.7	606.767	598.167
AT1G19600	1062.33	1046.73	1103.47	1537.97	1582.83	1484.9
AT1G19610	6.43333	6.23333	7.66667	21.7667	14.7667	11.9
AT1G19620	3.56667	2.96667	1.63333	1.66667	3	0.7
AT1G19630	2.53333	1	1.96667	10.4333	14.9	29.0333
AT1G19640	0	0	0	20.1333	27.1333	21.1667
AT1G19650	188.6	178.8	200.067	199.533	211.233	202.767
AT1G19660	861.533	765.8	739.467	2072.5	2028.9	1767.63
AT1G19670	74.9333	93.7	60.6333	1415.73	1421.63	1421.43
AT1G19680	483.433	448.933	398.167	367.433	410.833	350.8
AT1G19690	88.2333	96.5667	74.2333	105.833	101.3	104.233
AT1G19700	540.933	410.667	389.867	314.633	282.067	242.833
AT1G19710	307.867	334.267	309.4	270.533	286.133	282.233
AT1G19715	195.5	211.733	199	1022.77	838.9	985.433
AT1G19720	226.167	218.7	195.1	495.4	534.867	535.967
AT1G19730	62.9	61.3667	72.3333	167.3	156.8	154.4
AT1G19740	259.4	301.933	260.9	807.267	735.667	711.633
AT1G19750	21.6333	19.3333	24.1	37.3	41.3	32.4333
AT1G19770	9831.97	8031.33	7746.9	13080.5	12955.5	13355
AT1G19780	0.3	1.96667	1.63333	2.73333	1.7	0.633333
AT1G19790	8.93333	7.6	6.53333	20.8	16.1333	20
AT1G19800	274.867	282.167	273.433	442.9	392.1	388.6
AT1G19830	4.73333	2.63333	3.96667	0.7	1	1.33333
AT1G19835	2208.63	2238.43	2246.33	2499.87	2137.33	1992.33
AT1G19840	25.0667	23.5667	18.2	19.8	15.4333	14.5
AT1G19850	546.9	493.667	504.4	490.167	539.467	661.8
AT1G19860	229.833	263.4	243.033	148.4	166.233	170.567
AT1G19870	1707.03	1812.27	1878.17	1029.17	1089.5	1134.87
AT1G19880	838.733	799.967	817.867	808.233	829.8	869.633
AT1G19900	143.167	80.2667	108.2	36.3667	51.9333	49.7333
AT1G19910	6242.7	6259.17	6293.63	2997.83	2873.83	2599.83
AT1G19920	1278.13	1280.4	1203.5	1625.8	1449.83	1548.53
AT1G19940	144.967	147.633	142.067	117.233	111.6	106.533
AT1G19950	76.0333	78.7667	84.4	143.667	137.667	128.5
AT1G19960	50.2	46.5667	65.3333	8.7	12.8333	17.6667
AT1G19968	2.83333	3.6	2.63333	1.03333	3.66667	5.1
AT1G19970	120.933	144.367	123.867	58.5667	61	70
AT1G19980	79.6333	81.2333	75.3	74.7	80.9333	102.1
AT1G19990	64.0667	73.8667	77.0333	104.533	112.667	138.6
AT1G20000	0	0	0	0.733333	0	1.96667
AT1G20010	4806.67	5658.3	5527.53	3064.67	3181.2	3152.47
AT1G20015	0.633333	1.66667	0.966667	2.5	2.36667	2.6
AT1G20020	230.033	424.9	499.033	5742.47	5530.2	5332.67
AT1G20030	55.4667	81.8333	85.3	101.267	102.233	109.333
AT1G20050	1437.27	1467.7	1494.2	1193.07	1146.03	1152.37
AT1G20060	99.8333	79.9667	81.6667	95.2667	101.233	118.3
AT1G20065	2	1.63333	1	3.7	4.73333	3.7
AT1G20070	429.967	431.433	377.033	98.6	82.2333	63.4667
AT1G20080	15.8	15.1333	13.6	7.83333	3.73333	2.3
AT1G20090	1214.7	1296.2	1278.57	1077.87	952.867	985.667
AT1G20100	1450.33	1393.57	1517.67	1353.1	1387.43	1481.4
AT1G20110	2951.13	3055.4	2972.77	2153.93	2183.93	1994.43
AT1G20120	8	4.26667	5.96667	4.73333	9.36667	4.23333
AT1G20130	0.333333	0.666667	0	0	0.666667	0
AT1G20140	195.833	206.733	209.033	184.867	206.567	224.467
AT1G20150	7.1	7.23333	8.93333	0.333333	0	0.633333
AT1G20160	1855.07	1827.83	1700.73	78.1667	83.6333	82.1333
AT1G20180	2.5	1.66667	2	1.4	3.03333	0.666667
AT1G20190	3259.87	2942.13	2291.5	223.767	351.367	434.267
AT1G20200	1234.07	1302.13	1234.67	1161.57	1144.43	1162.1
AT1G20220	610.333	660.367	680.733	1178.6	1198.93	1458.27
AT1G20225	810.667	797.867	814.933	551.1	506.7	527.8
AT1G20230	25.9667	30.7667	26.5667	47.8333	40.8333	49.8333
AT1G20240	0	0	0	0.333333	0	0.7
AT1G20260	4181.1	4293.7	4322.53	3772.17	3758.83	3524.7
AT1G20270	263.433	252.5	249.433	227	287.8	233.2
AT1G20290	0.3	0.666667	0.333333	0	0.333333	0
AT1G20300	129.567	126.767	127.033	248.633	214.633	220.6
AT1G20310	222.033	230.767	234.267	69.9333	57.6667	51.2667
AT1G20320	6.36667	4.26667	6.63333	0.333333	1.36667	1
AT1G20330	1996.57	2069.47	1915.17	1963.97	1730.97	1826.97
AT1G20340	1270.5	1271.93	1073.67	13672.4	12900.1	12135.9
AT1G20350	2.23333	0.333333	0.666667	7	4.33333	3.03333
AT1G20370	196.867	201.6	221.233	279.767	266.467	297.8
AT1G20380	77	69.6	77.5333	42.3667	47.2333	49.2667
[truncated: 23,524 more rows]

## Sheet: dark degs
gene	5uM-Pic-D-H vs Mock-D-H log2fc	padj.x	50uM-Pic-D-H vs Mock-D-H log2fc	padj.y	50uM-Pic-D-H vs 5uM-Pic-D-H log2fc	padj
AT1G01010	-0.198289	0.5914	-0.11426	0.776059	0.0840284	1
AT1G01020	-0.0752374	0.986036	-0.00563557	0.995687	0.0696018	1
AT1G01030	-0.173853	0.996415	-0.118907	0.975226	0.0549465	1
AT1G01040	-0.0217388	0.998916	0.0530122	0.920788	0.074751	1
AT1G01046	3.70464	1	0	1	-3.66223	1
AT1G01050	-0.087091	0.901774	-0.0321444	0.944755	0.0549466	1
AT1G01060	-0.0574689	1	0.0120826	0.995839	0.0695516	1
AT1G01070	0.474135	0.143834	0.580041	0.0206704	0.105906	1
AT1G01080	-0.0748361	0.973422	-0.0548354	0.928395	0.0200007	1
AT1G01090	0.0711824	0.906084	0.0443024	0.886927	-0.02688	1
AT1G01100	0.105169	0.865456	0.0368368	0.94051	-0.068332	1
AT1G01110	0.136966	0.965913	0.0883283	0.9268	-0.0486381	1
AT1G01120	0.209288	0.712779	0.256217	0.380241	0.0469292	1
AT1G01130	0.045208	0.997039	-0.0230264	0.987409	-0.0682344	1
AT1G01140	-0.352137	0.456372	-0.737321	0.00113445	-0.385184	0.725357
AT1G01150	-0.706892	1	0.0365715	1	0.743464	1
AT1G01160	-0.108618	0.875906	-0.0475304	0.921076	0.0610877	1
AT1G01170	-0.0765133	0.991138	-0.0978235	0.909849	-0.0213102	1
AT1G01180	-0.523545	3.10043e-05	-0.392022	0.00323337	0.131522	1
AT1G01183	2.7282	1	-0.919393	1	-3.64759	1
AT1G01190	-1.06988	0.130194	-0.569649	0.544514	0.500235	1
AT1G01200	0.565609	0.289363	0.585548	0.172296	0.0199395	1
AT1G01210	0.248335	0.738111	0.582728	0.0105926	0.334393	0.804831
AT1G01220	0.174637	0.793785	0.0194461	0.983236	-0.155191	1
AT1G01225	0.137761	0.979037	0.278222	0.72403	0.140461	1
AT1G01230	-0.0255599	0.996415	-0.0778701	0.852282	-0.0523102	1
AT1G01240	-0.0990442	0.969397	-0.311804	0.259079	-0.21276	1
AT1G01250	0.414358	0.978725	0.66416	0.803379	0.249802	1
AT1G01260	0.11904	0.89133	0.0868182	0.850078	-0.0322214	1
AT1G01290	0.00239256	1	-0.0445949	0.945821	-0.0469874	1
AT1G01300	-0.0268808	0.997172	-0.211357	0.422286	-0.184476	1
AT1G01310	-0.298756	1	-0.409431	1	-0.110675	1
AT1G01320	0.0550688	0.996415	-0.244989	0.710886	-0.300058	1
AT1G01340	-0.5355	0.126284	-0.390113	0.319605	0.145387	1
AT1G01350	-0.043918	0.991138	0.0125803	0.986806	0.0564983	1
AT1G01355	-0.79823	0.856841	-0.3588	0.909319	0.43943	1
AT1G01360	-0.197021	0.751833	-0.260011	0.364829	-0.0629907	1
AT1G01370	0.0676866	0.996415	-0.0794999	0.962849	-0.147187	1
AT1G01380	0.0466636	1	0.228509	0.845731	0.181845	1
AT1G01390	0.11764	0.994744	-0.300404	0.834768	-0.418044	1
AT1G01420	-0.553508	0.182365	-1.0253	0.000218993	-0.471792	0.802299
AT1G01430	-0.172566	0.472927	-0.298829	0.0154429	-0.126264	1
AT1G01440	-0.0651029	0.982282	-0.0521067	0.93873	0.0129962	1
AT1G01448	-0.0277217	1	-0.21658	0.682943	-0.188858	1
AT1G01453	-0.766059	0.958389	0.699812	0.825124	1.46587	1
AT1G01460	0.0391206	1	-1.25843	1	-1.29755	1
AT1G01470	-0.146671	0.922594	-0.0740211	0.923055	0.0726502	1
AT1G01471	0	1	0	1	0	1
AT1G01480	0.596811	0.166344	0.22325	0.792869	-0.373561	1
AT1G01490	-0.414415	1.90675e-06	-0.449021	7.68654e-08	-0.0346061	1
AT1G01500	-0.199842	0.924762	-0.177437	0.832408	0.0224048	1
AT1G01510	-0.058199	0.953551	-0.0223717	0.958988	0.0358272	1
AT1G01520	-0.390911	0.847986	-0.109431	0.950631	0.28148	1
AT1G01530	-0.928258	1	0.0423735	1	0.970631	1
AT1G01540	0.24047	0.19012	0.414941	0.000467329	0.174472	0.952591
AT1G01550	0.0289405	0.986036	0.100048	0.52685	0.071108	1
AT1G01560	1.22112	0.0782955	0.888875	0.273252	-0.332245	1
AT1G01570	-0.0357329	1	-0.0237758	0.992699	0.0119571	1
AT1G01580	-0.578599	0.922741	0.26004	0.935129	0.838639	1
AT1G01590	1.89115	0.854675	1.90092	0.695574	0.00977911	1
AT1G01600	0.304167	0.743624	0.19275	0.805152	-0.111418	1
AT1G01610	-0.0548127	0.996415	-0.097253	0.908995	-0.0424403	1
AT1G01620	-0.056557	0.985519	-0.0767635	0.888357	-0.0202065	1
AT1G01630	0.125115	0.837379	0.0088388	0.990856	-0.116276	1
AT1G01640	-0.150669	0.837356	-0.16948	0.598553	-0.0188108	1
AT1G01650	-0.0773571	0.973898	-0.0193746	0.982938	0.0579824	1
AT1G01660	-0.185072	0.992436	0.0474414	0.990826	0.232514	1
AT1G01670	-0.914157	0.686184	0.146468	0.962919	1.06062	0.950376
AT1G01680	-0.221262	1	-0.533118	1	-0.311856	1
AT1G01690	-0.0436179	0.9996	-0.0695504	0.964137	-0.0259325	1
AT1G01695	-0.654355	1	0.670816	0.802943	1.32517	1
AT1G01700	-0.0120056	1	0.257077	0.750499	0.269083	1
AT1G01710	-0.0919616	0.874459	0.0375599	0.928206	0.129522	1
AT1G01720	-0.0039697	1	0.355564	0.000992707	0.359534	0.00589044
AT1G01725	0.195606	0.944107	0.0965165	0.937248	-0.0990896	1
AT1G01730	0.0513542	0.974671	0.0347208	0.93873	-0.0166334	1
AT1G01740	-0.153328	0.954242	-0.0543161	0.963494	0.0990115	1
AT1G01750	0.355174	0.856556	0.324369	0.748453	-0.0308046	1
AT1G01760	0.00959732	1	-0.0597119	0.968328	-0.0693092	1
AT1G01770	-0.134319	0.854675	-0.237155	0.279317	-0.102837	1
AT1G01780	-0.214078	0.625271	-0.0512745	0.939497	0.162803	1
AT1G01790	0.0675407	0.969397	0.0591024	0.89171	-0.00843827	1
AT1G01800	-0.00706068	1	-0.049312	0.893106	-0.0422513	1
AT1G01810	-0.331817	0.948565	-0.0476383	0.986806	0.284178	1
AT1G01820	-0.0412398	0.982686	-0.0198295	0.969579	0.0214103	1
AT1G01830	-0.168446	0.789493	-0.379133	0.0382351	-0.210687	1
AT1G01840	-0.593696	0.875493	-1.05365	0.362182	-0.459959	1
AT1G01860	0.0175259	1	-0.0606769	0.964199	-0.0782029	1
AT1G01880	-0.261947	0.93296	-0.0611406	0.974297	0.200807	1
AT1G01900	0.118166	0.97053	-0.0599602	0.95225	-0.178126	1
AT1G01910	0.035416	0.991167	0.0414267	0.926374	0.00601068	1
AT1G01920	0.0908218	0.971331	0.250356	0.404698	0.159534	1
AT1G01930	-0.296781	0.150328	-0.274207	0.150651	0.022574	1
AT1G01940	0.0244444	0.9996	0.135526	0.777925	0.111082	1
AT1G01950	0.209041	0.41025	0.259284	0.120297	0.050243	1
AT1G01960	0.0663032	0.884199	-0.0172327	0.964101	-0.0835359	1
AT1G01970	-0.284677	0.632386	-0.292079	0.461178	-0.00740154	1
AT1G01980	0.0335286	1	-0.919372	1	-0.952901	1
AT1G01990	-0.290738	0.147664	-0.210062	0.352525	0.0806759	1
AT1G02000	0.210098	0.301058	0.450254	4.52585e-05	0.240157	0.411841
AT1G02010	0.119001	0.911391	-0.0398901	0.953399	-0.158891	1
AT1G02020	-0.0145992	1	-0.176812	0.512173	-0.162212	1
AT1G02030	0.392454	0.906655	0.0684781	0.97943	-0.323976	1
AT1G02040	-0.928261	1	0.042378	1	0.970639	1
AT1G02050	-0.281629	0.858763	-0.100261	0.936361	0.181369	1
AT1G02060	-0.259024	0.732654	-0.279028	0.517019	-0.0200039	1
AT1G02065	-0.160939	1	-1.74716	1	-1.58622	1
AT1G02070	-0.107349	1	-0.632905	1	-0.525556	1
AT1G02074	0.798826	1	-2.41857	1	-3.2174	1
AT1G02080	0.0541965	0.953883	-0.00407993	0.992955	-0.0582765	1
AT1G02090	0.0377572	0.992436	0.111554	0.749236	0.0737966	1
AT1G02100	-0.0755218	0.947939	-0.0440653	0.922059	0.0314566	1
AT1G02110	-0.00704418	1	-0.150857	0.65376	-0.143813	1
AT1G02120	-0.0594307	0.924968	-0.0170164	0.964354	0.0424143	1
AT1G02130	-0.0274	0.990275	-0.022927	0.949624	0.004473	1
AT1G02136	-0.928255	1	-0.919361	1	0	1
AT1G02140	0.0742492	0.888473	0.0278683	0.94115	-0.0463809	1
AT1G02145	-0.00746464	1	-0.140804	0.574129	-0.13334	1
AT1G02150	0.0328006	0.996415	-0.150085	0.697262	-0.182886	1
AT1G02160	-0.161403	0.856841	-0.289667	0.279557	-0.128265	1
AT1G02170	0.0226251	0.99683	-0.025791	0.964354	-0.0484161	1
AT1G02180	-0.113892	0.973422	0.0807327	0.930594	0.194624	1
AT1G02190	-0.0627579	1	-0.257707	0.958427	-0.194949	1
AT1G02205	0.176731	0.982351	0.075351	0.973851	-0.10138	1
AT1G02220	-0.0883952	0.993326	-0.148832	0.903629	-0.0604366	1
AT1G02230	-0.645015	0.841097	-0.0434272	0.990856	0.601587	1
AT1G02250	-0.936096	1	0.0725397	1	1.00864	1
AT1G02260	0.0906946	0.958916	0.266758	0.204584	0.176063	1
AT1G02270	0.0308427	0.996415	0.073422	0.87821	0.0425794	1
AT1G02280	-0.0772922	0.978725	-0.134561	0.780286	-0.0572684	1
AT1G02290	0.0153632	1	-0.00555872	0.99569	-0.020922	1
AT1G02300	-0.297733	0.660029	-0.516519	0.0745705	-0.218786	1
AT1G02305	-0.126971	0.53704	-0.0871543	0.66908	0.0398163	1
AT1G02310	-0.401068	0.585798	-0.293968	0.659855	0.107101	1
AT1G02330	-0.0176468	0.9998	0.0113367	0.988861	0.0289835	1
AT1G02335	-0.0856205	0.969165	-0.017797	0.98372	0.0678235	1
AT1G02340	-0.264311	0.716014	-0.435115	0.136059	-0.170805	1
AT1G02350	0.668596	0.851619	0.581418	0.757663	-0.0871779	1
AT1G02360	0.0224309	1	-0.0649885	0.967292	-0.0874194	1
AT1G02370	0.335664	0.679147	-0.0489572	0.97215	-0.384621	0.955198
AT1G02380	-0.457803	0.88162	-0.358562	0.823192	0.0992407	1
AT1G02390	-0.186064	0.909072	-0.143623	0.847891	0.0424404	1
AT1G02400	0.204778	0.862804	0.340582	0.346889	0.135804	1
AT1G02405	0.377811	0.978456	0.062683	0.990826	-0.315128	1
AT1G02410	0.093598	0.964856	0.00981523	0.99266	-0.0837827	1
AT1G02420	0.192744	0.923917	0.207513	0.769197	0.0147685	1
AT1G02430	0.379234	0.913531	0.130168	0.952899	-0.249066	1
AT1G02440	-0.424084	0.971331	0.827412	0.608744	1.2515	1
AT1G02450	-0.440542	0.973898	1.03486	0.507774	1.4754	1
AT1G02460	-0.487745	0.706034	-0.280117	0.813293	0.207628	1
AT1G02470	0.700267	0.351666	0.204414	0.891516	-0.495853	1
AT1G02475	-0.0744238	0.980489	0.079284	0.897264	0.153708	1
AT1G02490	0.0335288	1	1.52351	1	1.48998	1
AT1G02500	-0.0589881	0.953551	-0.0131081	0.978468	0.04588	1
AT1G02510	-0.928255	1	-0.919361	1	0	1
AT1G02520	0.118413	0.939182	0.193633	0.581231	0.0752196	1
AT1G02530	0.171497	0.99683	0.170189	0.970542	-0.00130754	1
AT1G02560	-0.00106901	1	-0.117688	0.671526	-0.116619	1
AT1G02570	0.0424597	1	0.286103	0.948549	0.243643	1
AT1G02575	1.20547	1	-0.957485	1	-2.16296	1
AT1G02580	-0.0860824	0.996415	-0.153162	0.931167	-0.0670792	1
AT1G02610	-0.126521	0.991167	-0.413523	0.654942	-0.287002	1
AT1G02620	1.04126	1	0.703097	0.84435	-0.338159	1
AT1G02630	0.035205	1	0.590304	0.842115	0.555099	1
AT1G02640	-0.0685652	0.981875	-0.188556	0.585011	-0.119991	1
AT1G02650	0.67891	0.477019	0.411269	0.720921	-0.267641	1
AT1G02660	0.0295862	0.997039	0.32518	0.127703	0.295593	0.635277
AT1G02670	-0.000688821	1	-0.169076	0.874074	-0.168388	1
AT1G02680	-0.021275	1	-0.033923	0.975569	-0.0126481	1
AT1G02681	-0.585057	1	-2.48472	1	-1.89966	1
AT1G02690	-0.0167007	1	0.0314462	0.975226	0.0481469	1
AT1G02700	0.426749	0.945931	0.121078	0.969595	-0.305671	1
AT1G02710	-0.0192048	1	-0.160769	0.948959	-0.141564	1
AT1G02720	-0.100144	0.97053	-0.384599	0.132997	-0.284455	0.952591
AT1G02730	-0.166412	0.942832	-0.145372	0.857794	0.0210391	1
AT1G02740	0.194721	0.631783	0.149029	0.664057	-0.0456921	1
AT1G02750	-0.161469	0.825474	-0.122227	0.787134	0.0392427	1
AT1G02770	0.432792	0.85876	0.327884	0.818916	-0.104908	1
AT1G02780	0.0784125	0.923007	0.0336929	0.939091	-0.0447196	1
AT1G02800	0.456706	0.945773	-0.0380377	0.992699	-0.494744	1
AT1G02810	-0.226754	0.843446	-0.329484	0.415443	-0.10273	1
AT1G02813	-3.42912	1	-1.54874	1	1.88038	1
AT1G02816	-0.0165684	0.997172	0.138629	0.366509	0.155197	0.744365
AT1G02820	1.20789	0.498719	0.15948	0.971157	-1.04841	1
AT1G02830	1.87011	1	0	1	-1.82767	1
AT1G02840	0.0203815	0.996415	0.0548883	0.862695	0.0345068	1
AT1G02850	0.458689	0.0323578	0.625144	0.000284683	0.166456	1
AT1G02860	0.0545738	0.973898	0.149686	0.460407	0.095112	1
AT1G02870	-0.0880561	0.977405	-0.0374538	0.968324	0.0506023	1
AT1G02880	0.177397	0.840061	0.109842	0.850597	-0.0675542	1
AT1G02890	0.0652649	0.982967	0.0574973	0.935129	-0.00776768	1
AT1G02900	0.160511	0.753752	0.261361	0.181607	0.100851	1
AT1G02910	0.107596	0.911391	-0.0669139	0.890407	-0.17451	1
AT1G02920	-0.034486	0.9996	-0.283853	0.574968	-0.249367	1
AT1G02930	0.0877805	0.99253	-0.354582	0.604019	-0.442362	0.995742
AT1G02940	0	1	0	1	0	1
AT1G02950	-0.144382	0.982351	0.00520761	0.998148	0.149589	1
AT1G02952	-0.928255	1	0.0423293	1	0.970584	1
AT1G02960	0.0735451	0.982282	-0.0171029	0.987054	-0.090648	1
AT1G02965	0.995321	1	1.00417	1	0.00884507	1
AT1G02970	0.193245	0.948881	0.143818	0.891516	-0.0494276	1
AT1G02980	-1.55147	1	-0.217114	1	1.33436	1
AT1G02990	0.0533382	0.984387	0.0773351	0.872814	0.0239969	1
AT1G03000	-0.110791	0.923007	-0.272845	0.190467	-0.162055	1
AT1G03010	-0.400504	0.825474	-0.190566	0.889834	0.209938	1
AT1G03020	-0.701872	0.972418	-1.28004	0.767997	-0.578171	1
AT1G03030	-0.0319584	0.998916	0.00209712	0.999188	0.0340555	1
AT1G03040	-0.0818296	0.911391	-0.0499482	0.891516	0.0318814	1
AT1G03055	2.25605	0.676266	1.93644	0.636609	-0.319607	1
AT1G03060	-0.0258789	0.992436	0.056703	0.839765	0.0825819	1
AT1G03070	-0.0182099	1	-0.0153539	0.99266	0.00285594	1
AT1G03080	-0.0712261	0.973898	-0.0309714	0.964354	0.0402547	1
AT1G03090	-0.299312	0.669604	-0.248775	0.637062	0.050537	1
AT1G03100	-0.105291	0.990298	0.159049	0.8798	0.264341	1
AT1G03103	0	1	0	1	0	1
AT1G03106	-0.509764	0.991167	0.310895	0.968328	0.820659	1
AT1G03110	-0.016142	1	0.0748455	0.910022	0.0909875	1
AT1G03120	-0.596851	0.913396	-0.914768	0.567437	-0.317917	1
AT1G03130	0.0461257	0.9996	-0.262543	0.792416	-0.308669	1
AT1G03140	-0.0290693	0.99284	-0.0378286	0.933081	-0.00875926	1
AT1G03150	0.11498	0.942532	0.15788	0.701303	0.0429002	1
AT1G03160	-0.0865876	0.976245	-0.135667	0.802043	-0.0490793	1
AT1G03170	-0.077994	0.997907	-0.752938	0.303206	-0.674944	0.954567
AT1G03180	0.368136	0.709147	0.0512497	0.975569	-0.316886	1
AT1G03190	0.123763	0.908475	-0.00904681	0.992699	-0.13281	1
AT1G03200	-0.304036	0.869358	0.00947091	0.995328	0.313507	1
AT1G03210	-0.0954718	0.969397	-0.00871927	0.992955	0.0867525	1
AT1G03220	-0.114638	0.939182	-0.113625	0.820084	0.00101288	1
AT1G03230	0.13787	0.876554	-0.138855	0.732561	-0.276725	0.686521
AT1G03240	-1.54897	1	0.458539	1	2.00751	1
AT1G03250	-0.0670781	0.948565	0.00708312	0.990856	0.0741612	1
AT1G03260	-0.00387346	1	0.0231932	0.975569	0.0270667	1
AT1G03270	0.16009	0.991167	-0.283573	0.872814	-0.443663	1
AT1G03280	-0.123141	0.683174	-0.0857897	0.736974	0.0373516	1
AT1G03290	-0.155515	0.793648	-0.244589	0.267755	-0.0890733	1
AT1G03300	-0.219006	0.954242	-0.27551	0.777238	-0.0565037	1
AT1G03310	0.124343	0.962644	-0.334394	0.338174	-0.458737	0.375777
AT1G03320	1.62395	1	0.0429298	1	-1.58102	1
AT1G03330	0.0109443	1	-0.0250977	0.964354	-0.0360419	1
AT1G03340	0.0100939	1	-0.161773	0.870485	-0.171867	1
AT1G03350	0.125279	0.715058	0.0472828	0.901384	-0.0779964	1
AT1G03360	0.205856	0.883363	0.348049	0.382937	0.142193	1
AT1G03365	-0.0614349	0.982686	-0.133469	0.742072	-0.0720337	1
AT1G03370	0.00788463	1	-0.0127278	0.987311	-0.0206125	1
AT1G03380	-0.210698	0.165368	-0.262339	0.0231815	-0.0516418	1
AT1G03390	1.9267	1	1.94352	1	0.0168156	1
AT1G03400	-0.0874356	0.991955	0.0425241	0.978301	0.12996	1
AT1G03410	0.204796	0.943144	0.354372	0.562925	0.149575	1
AT1G03430	0.0253803	0.999046	-0.0886561	0.882646	-0.114036	1
AT1G03440	-0.238629	0.531016	-0.32697	0.131889	-0.0883403	1
AT1G03445	-0.260533	0.887094	-0.120445	0.91964	0.140088	1
AT1G03457	-0.0440371	0.991167	0.0525895	0.920788	0.0966266	1
AT1G03470	-0.0778662	0.978253	-0.0886484	0.880704	-0.0107822	1
AT1G03475	0.0225082	0.996415	-0.0969064	0.736974	-0.119415	1
AT1G03490	-0.263258	1	-1.23662	1	-0.973366	1
AT1G03495	0.145295	0.969659	0.419922	0.323074	0.274628	1
AT1G03502	1.1482	1	1.15631	1	0.00810724	1
AT1G03506	0.375186	0.943928	0.657308	0.549089	0.282122	1
AT1G03510	0.287228	0.913531	0.221646	0.857161	-0.0655814	1
AT1G03520	0.047236	0.984716	0.211496	0.271285	0.16426	1
AT1G03530	0.174796	0.831408	0.283956	0.28965	0.10916	1
AT1G03540	0.130294	0.991656	0.141299	0.935966	0.0110058	1
AT1G03550	0.138456	0.982426	0.311667	0.716941	0.173211	1
AT1G03560	-0.11043	0.924762	-0.101117	0.824871	0.00931375	1
AT1G03580	-0.521877	0.759055	-0.0882602	0.968328	0.433617	1
AT1G03590	0.253068	0.499458	0.0784527	0.898071	-0.174615	1
AT1G03600	0.0650205	0.99896	-0.312841	0.809585	-0.377861	1
AT1G03610	0.330169	0.499367	0.273761	0.526198	-0.0564079	1
AT1G03620	-0.153957	0.969397	0.311627	0.589622	0.465584	0.744365
AT1G03630	0.0394743	0.99683	-0.207553	0.678338	-0.247028	1
AT1G03650	-0.109649	0.991955	0.464792	0.469818	0.574441	0.780673
AT1G03660	-0.838767	0.895614	-0.829031	0.761179	0.00973505	1
AT1G03670	-0.928263	1	0.0423693	1	0.970632	1
AT1G03680	0.0215356	1	-0.32677	0.508785	-0.348305	1
AT1G03687	0.0463478	0.996415	-0.0556426	0.959564	-0.10199	1
AT1G03700	-0.268644	0.969397	-0.0348842	0.990856	0.23376	1
AT1G03710	0.0418354	1	-0.261134	1	-0.30297	1
AT1G03730	-0.0974912	0.86347	0.00167482	0.997536	0.099166	1
AT1G03740	-0.279974	0.290948	-0.247418	0.309766	0.0325557	1
AT1G03746	0	1	1.00413	1	0.970598	1
AT1G03750	-0.172235	0.844555	-0.302724	0.254153	-0.130488	1
AT1G03760	0.144023	0.963029	0.153604	0.84451	0.00958131	1
AT1G03770	-0.0305328	0.997027	0.0289875	0.973116	0.0595202	1
AT1G03780	-0.233322	0.746153	-0.261544	0.502406	-0.0282219	1
AT1G03790	-0.312139	0.708574	0.137705	0.874928	0.449844	0.692795
AT1G03800	0.184475	0.991138	0.658994	0.544482	0.47452	1
AT1G03820	0.484908	0.392319	0.858254	0.00483119	0.373346	1
AT1G03830	0.0734363	0.982686	-0.123753	0.836541	-0.19719	1
AT1G03840	-0.570591	0.5104	-0.643133	0.272088	-0.0725416	1
AT1G03850	-0.419026	0.0396129	-0.487671	0.00498515	-0.0686453	1
AT1G03860	0.0754138	0.97053	0.0907589	0.842186	0.0153451	1
AT1G03870	0.380661	0.0326969	0.341699	0.0498096	-0.038962	1
AT1G03880	-0.493186	0.998314	1.94164	0.832408	2.43483	1
AT1G03890	1.51436	1	4.60384	1	3.08948	1
AT1G03900	-0.0133562	0.99896	-0.0198995	0.964101	-0.00654324	1
AT1G03905	-0.0443024	0.996415	0.0321585	0.978468	0.0764609	1
AT1G03910	-0.0321385	0.988787	-0.0469206	0.886363	-0.0147821	1
AT1G03920	-0.142898	0.913531	0.052481	0.948535	0.195379	1
AT1G03930	0.12456	0.814725	0.0825011	0.824016	-0.0420591	1
AT1G03935	0.102799	0.982426	0.198046	0.781592	0.0952473	1
AT1G03940	0.00378898	1	0.161339	0.84223	0.15755	1
AT1G03950	-0.159997	0.824824	-0.0800477	0.8852	0.0799491	1
AT1G03960	-0.0360771	0.996415	0.0238821	0.978468	0.0599592	1
AT1G03970	-0.0517041	0.991955	-0.133452	0.792521	-0.0817476	1
AT1G03980	-0.519966	0.939182	-1.17412	0.399835	-0.654151	1
AT1G03982	-0.928256	1	0.0423565	1	0.970612	1
AT1G03990	0.0720147	0.991955	0.368735	0.320858	0.29672	1
AT1G04000	0.0840277	0.978456	0.0365023	0.968025	-0.0475254	1
AT1G04010	0.0346859	0.998916	0.121532	0.872814	0.0868458	1
AT1G04020	-0.0146034	1	0.0112217	0.992955	0.0258251	1
AT1G04030	-0.164279	0.853536	0.00363952	0.996648	0.167919	1
AT1G04040	0.0701116	0.939338	-0.0411246	0.916725	-0.111236	1
AT1G04050	-0.114203	0.969165	-0.0902842	0.906892	0.0239187	1
AT1G04070	0.0932322	0.969743	0.164394	0.692994	0.0711614	1
AT1G04080	-0.0775861	0.929908	-0.0461671	0.907885	0.031419	1
AT1G04090	0.0424859	1	-0.264743	0.880294	-0.307229	1
AT1G04100	0.470838	0.0810278	0.748485	0.000107587	0.277647	0.958856
AT1G04110	0.301212	0.991167	0.924209	0.660663	0.622998	1
AT1G04120	-0.0442264	0.97141	-0.0568429	0.832408	-0.0126165	1
AT1G04130	0.145984	0.927182	0.0188077	0.987054	-0.127176	1
AT1G04140	-0.000646193	1	0.0182306	0.950467	0.0188768	1
AT1G04150	0.625264	1	-1.84063	0.72656	-2.46589	1
AT1G04160	0.07	0.986036	-0.075334	0.922059	-0.145334	1
AT1G04170	0.0458928	0.960899	0.103401	0.461545	0.057508	1
AT1G04171	0.995312	1	1.00413	1	0.00881426	1
AT1G04180	-1.12054	0.00133822	-0.729925	0.0634234	0.390619	1
AT1G04190	0.145311	0.7058	0.132118	0.605548	-0.0131934	1
AT1G04200	0.0468519	0.978126	-0.0111072	0.985193	-0.0579591	1
AT1G04210	0.0189874	0.997172	0.0603067	0.869581	0.0413192	1
AT1G04220	-0.104366	0.971331	-0.192531	0.689875	-0.0881649	1
AT1G04230	0.0427865	0.992436	-0.0355217	0.961471	-0.0783082	1
AT1G04240	1.29505	1.8777e-17	1.69105	1.82709e-30	0.395997	0.310877
AT1G04250	0.297299	0.349514	0.395723	0.0572748	0.098424	1
AT1G04260	0.247248	0.275373	0.23118	0.249124	-0.0160688	1
AT1G04270	0.0964473	0.884199	0.116332	0.651623	0.0198844	1
AT1G04280	-0.17177	0.508153	-0.123309	0.626913	0.0484616	1
AT1G04290	1.92948	1	-0.919395	1	-2.84888	1
AT1G04300	-0.0726486	0.863861	-0.0596294	0.79414	0.0130192	1
AT1G04310	-0.144554	0.935795	0.227522	0.589854	0.372076	0.617955
AT1G04330	0.0973952	0.99683	0.133659	0.955323	0.0362635	1
AT1G04340	0.142752	0.854722	0.104214	0.823444	-0.0385381	1
AT1G04350	-0.30116	0.477019	-0.0988063	0.883745	0.202353	1
AT1G04360	-0.420357	0.715175	-0.526176	0.371929	-0.10582	1
AT1G04370	0.995324	0.976245	1.90041	0.691638	0.905088	1
AT1G04380	-1.24911	0.684524	-0.460944	0.88214	0.788166	1
AT1G04390	-0.0213179	1	0.0832711	0.889381	0.104589	1
AT1G04400	-0.0767092	0.89025	-0.099779	0.611265	-0.0230698	1
AT1G04410	-0.00720229	1	0.0145009	0.979974	0.0217032	1
AT1G04420	-0.00286556	1	-0.171047	0.759931	-0.168182	1
AT1G04425	-0.0286795	1	-0.519863	0.671493	-0.491184	1
AT1G04430	0.0866633	0.945916	0.0149027	0.98372	-0.0717606	1
AT1G04440	0.125419	0.610522	0.144014	0.339564	0.0185942	1
AT1G04445	0.451566	0.97141	0.5173	0.858721	0.0657344	1
AT1G04470	2.88621	1	2.90445	1	0.0182329	1
AT1G04480	0.0932417	0.923007	0.1401	0.593645	0.0468581	1
AT1G04490	0.131537	0.977406	0.00787387	0.99568	-0.123664	1
AT1G04500	-3.04266	1	-0.801271	1	2.24139	1
AT1G04510	0.0374121	0.982282	-0.0336454	0.928206	-0.0710576	1
AT1G04520	0.0837014	0.988346	-0.0900317	0.926082	-0.173733	1
AT1G04530	0.0084525	1	0.0218478	0.978468	0.0133953	1
AT1G04540	0.513382	0.148653	0.56814	0.0505991	0.0547582	1
AT1G04550	0.777953	1.52221e-10	1.07347	5.5124e-21	0.295519	0.311994
AT1G04555	0.0894947	0.986036	-0.100768	0.917754	-0.190262	1
AT1G04560	0.117267	1	0.704855	0.846327	0.587588	1
AT1G04570	-0.0353602	1	0.292509	0.820844	0.327869	1
AT1G04580	-1.5359	1	-0.945295	1	0.590605	1
AT1G04590	-0.0107865	1	-0.152548	0.661752	-0.141762	1
AT1G04600	0.383139	0.951993	0.393809	0.832408	0.0106704	1
AT1G04610	0.344674	0.893274	1.04497	0.0183145	0.700292	0.660581
AT1G04620	-0.104088	0.977406	-0.119236	0.878101	-0.0151478	1
AT1G04630	0.169785	0.708259	0.0475117	0.936	-0.122273	1
AT1G04635	0.189404	0.981875	0.4394	0.674661	0.249997	1
AT1G04640	-0.0128028	1	-0.112351	0.899175	-0.0995481	1
AT1G04650	-0.131603	0.98684	-0.262795	0.814855	-0.131192	1
AT1G04660	1.04817	0.716014	0.789239	0.727686	-0.258935	1
AT1G04670	2.45412	1	0	1	-2.41168	1
AT1G04680	0.155901	0.938361	-0.0934438	0.910696	-0.249345	1
AT1G04690	0.0338859	0.985925	-0.0223173	0.961191	-0.0562032	1
AT1G04700	0.0118858	1	0.1325	0.909849	0.120614	1
AT1G04710	0.0520315	0.991656	0.0173846	0.986028	-0.0346469	1
AT1G04730	0.0613739	0.994599	0.0154608	0.991315	-0.0459131	1
AT1G04750	-0.0222711	0.994744	-0.0359972	0.91342	-0.0137261	1
AT1G04760	-0.0512924	0.9998	-0.100565	0.95567	-0.0492725	1
AT1G04770	0.368273	0.858656	0.603577	0.352053	0.235304	1
AT1G04778	0.540281	0.321758	0.645932	0.0944794	0.105651	1
AT1G04780	-0.0508126	0.963528	-0.100522	0.577972	-0.0497093	1
AT1G04790	-0.018526	0.999471	0.0554659	0.906609	0.0739918	1
AT1G04800	0.172255	0.995311	-0.0770716	0.984487	-0.249327	1
AT1G04810	-0.0363666	0.97141	-0.00721426	0.986308	0.0291523	1
AT1G04820	0.120658	0.956575	0.041752	0.964354	-0.0789055	1
AT1G04830	-0.00901744	1	0.0537286	0.880704	0.062746	1
AT1G04840	0.0556855	0.9996	0.159751	0.919776	0.104065	1
AT1G04850	0.0103053	1	0.0323769	0.919901	0.0220716	1
AT1G04860	0.0240525	0.996415	0.0828987	0.813293	0.0588462	1
AT1G04870	0.10651	0.920032	0.317299	0.0561389	0.210789	0.899426
AT1G04880	-0.00228575	1	0.00470054	1	0.00698629	1
AT1G04900	0.0210123	1	-0.0310155	0.978301	-0.0520278	1
AT1G04910	0.141673	0.53862	0.0862396	0.735042	-0.055433	1
AT1G04920	0.574418	0.823537	0.711799	0.514801	0.137381	1
AT1G04930	-0.05156	0.99683	0.065835	0.957287	0.117395	1
AT1G04940	0.0386167	1	-1.43636	1	-1.47498	1
AT1G04945	-0.0289086	0.9996	0.261678	0.530991	0.290586	0.998106
AT1G04950	-0.188744	0.412592	-0.0906526	0.778043	0.0980909	1
AT1G04960	-0.132083	0.610522	-0.0235293	0.960233	0.108554	1
AT1G04970	0.00130576	1	0.0236137	0.970542	0.0223079	1
AT1G04980	0.196392	0.827827	0.133606	0.8241	-0.0627855	1
AT1G04985	-0.245493	0.217566	-0.128997	0.655762	0.116495	1
AT1G04990	0.0836668	0.958979	0.0463866	0.936303	-0.0372801	1
AT1G05000	0.31004	0.310446	0.176604	0.665255	-0.133436	1
AT1G05010	-0.171895	0.911472	-0.194134	0.727072	-0.0222388	1
AT1G05020	0.00334296	1	-0.00514364	0.996648	-0.00848661	1
AT1G05030	0.00595081	1	0.0224593	0.985508	0.0165085	1
AT1G05040	-2.41455	1	-0.529167	1	1.88538	1
AT1G05055	-0.107917	0.922741	-0.0284577	0.96755	0.0794597	1
AT1G05060	-0.0729642	0.979903	-0.169787	0.659989	-0.0968226	1
AT1G05061	0.227249	0.991955	0.406325	0.876813	0.179076	1
AT1G05065	0.478338	0.869358	0.714537	0.44975	0.2362	1
AT1G05070	0.119457	0.887094	-0.0219152	0.976726	-0.141372	1
AT1G05080	0.0335284	1	-0.919334	1	-0.952863	1
AT1G05090	-0.0347241	0.998916	-0.0097496	0.993046	0.0249745	1
AT1G05100	0.337872	0.884066	0.387908	0.67371	0.0500366	1
AT1G05120	-0.0307979	0.99253	0.00581992	0.992897	0.0366178	1
AT1G05135	-0.0385386	0.997039	-0.228667	0.616153	-0.190129	1
AT1G05140	-0.0291021	0.9996	-0.147173	0.818966	-0.118071	1
AT1G05150	0.171683	0.259726	0.165874	0.208135	-0.00580923	1
AT1G05160	-0.00731302	1	-0.194527	0.751439	-0.187214	1
AT1G05170	0.227641	0.4494	0.172695	0.561099	-0.0549463	1
AT1G05180	0.00630821	1	0.122989	0.507774	0.116681	1
AT1G05190	0.138943	0.965913	-0.176453	0.806879	-0.315397	1
AT1G05200	-0.00197068	1	-0.060343	0.931944	-0.0583723	1
AT1G05205	-0.0859971	0.973898	-0.0907902	0.880704	-0.00479312	1
AT1G05210	0.210636	0.963833	-0.00578409	0.997536	-0.21642	1
AT1G05220	0.134379	0.996415	0.090471	0.978855	-0.0439082	1
AT1G05230	-0.0906561	0.976245	-0.0925491	0.893001	-0.001893	1
AT1G05240	-0.928265	1	0.0423781	1	0.970643	1
AT1G05250	0	1	1.00416	1	0.970636	1
AT1G05260	-0.180678	0.705051	-0.178278	0.554172	0.00240001	1
AT1G05270	0.0816681	0.921333	0.0292549	0.950814	-0.0524132	1
AT1G05280	0.486822	0.906738	-0.661175	0.674661	-1.148	0.686521
AT1G05290	0	1	0	1	0	1
AT1G05300	-0.389443	0.541465	-0.724244	0.0202692	-0.334801	1
AT1G05310	-0.240091	0.800644	-0.0243927	0.985193	0.215698	1
AT1G05320	-0.185917	0.502432	-0.073303	0.857933	0.112614	1
AT1G05330	-0.383298	1	-0.567164	1	-0.183866	1
AT1G05340	-0.300332	0.570101	-0.216748	0.661117	0.0835843	1
AT1G05350	-0.00875871	1	0.0497459	0.874309	0.0585047	1
AT1G05360	0.0414277	0.996415	-0.11424	0.829448	-0.155668	1
AT1G05370	-0.0997019	0.99253	-0.0339152	0.987492	0.0657866	1
AT1G05380	-0.0385905	0.980777	0.090805	0.66236	0.129396	0.954567
AT1G05385	0.23668	0.906084	0.0621002	0.96534	-0.17458	1
AT1G05400	-0.0169959	1	-0.298789	0.778048	-0.281793	1
AT1G05410	-0.064591	0.983667	-0.0205491	0.982938	0.0440419	1
AT1G05420	-0.0557108	1	-0.0463157	0.989939	0.00939502	1
AT1G05430	0.109973	0.887977	0.080153	0.847908	-0.0298199	1
AT1G05440	0.0110219	1	0.196185	0.890155	0.185163	1
AT1G05450	-0.555991	0.898131	-0.132714	0.967825	0.423277	1
AT1G05460	-0.380659	0.412035	-0.170531	0.801894	0.210128	1
AT1G05470	-0.0519744	0.991955	0.152573	0.739991	0.204548	1
AT1G05490	0.184298	0.95037	0.0811768	0.949559	-0.103121	1
AT1G05500	-0.0609765	0.911391	0.0336397	0.906609	0.0946162	1
AT1G05510	0.196583	0.998916	-0.206801	0.975569	-0.403384	1
AT1G05520	0.0897756	0.745017	0.10195	0.490932	0.0121742	1
AT1G05530	-0.545974	0.935949	-1.5879	0.166274	-1.04193	1
AT1G05540	-0.527478	1	-0.0942582	0.990856	0.43322	1
AT1G05550	-2.19307	1	-1.29552	1	0.897552	1
AT1G05560	-0.481443	0.982282	0.538837	0.885754	1.02028	1
AT1G05570	-0.152363	0.602058	-0.0850471	0.791949	0.0673163	1
AT1G05575	-0.354095	0.0992588	-0.36436	0.0533635	-0.0102658	1
AT1G05577	-0.293559	0.991656	0.664353	0.794738	0.957912	1
AT1G05590	0.182814	0.809829	-0.0791206	0.904476	-0.261934	0.932661
AT1G05600	0.00923058	1	-0.0867154	0.926912	-0.095946	1
AT1G05610	-0.600751	0.73482	-0.303594	0.851697	0.297157	1
AT1G05615	1.91289	1	0	1	-1.87047	1
AT1G05620	0.094488	0.876787	0.103767	0.687351	0.00927908	1
AT1G05630	0.188445	0.660029	0.325425	0.0659608	0.13698	1
AT1G05640	0.00542911	1	-0.0878121	0.949568	-0.0932413	1
AT1G05650	-1.0158	0.667108	-4.07418	0.000121745	-3.05838	1
AT1G05660	-0.602251	0.921956	-1.96561	0.0446529	-1.36335	0.785725
AT1G05670	-0.114709	0.974852	0.059126	0.957637	0.173835	1
AT1G05675	0.204512	0.968566	-0.0205869	0.992699	-0.225099	1
AT1G05680	0.495748	0.783688	0.496062	0.619311	0.000313373	1
AT1G05690	-0.480734	0.837831	0.0643892	0.978639	0.545123	1
AT1G05700	-0.399747	0.850024	-0.557838	0.470293	-0.158091	1
AT1G05710	0.311635	0.263962	0.423842	0.0254481	0.112207	1
AT1G05720	0.207207	0.784374	-0.0501579	0.95506	-0.257365	1
AT1G05730	0.0386236	1	0.474481	0.729429	0.435858	1
AT1G05740	0.58216	1	1.57782	1	0.995656	1
AT1G05750	-0.349182	0.706428	-0.199859	0.814215	0.149322	1
AT1G05770	-0.180107	0.963528	-0.0776057	0.95567	0.102502	1
AT1G05780	0.166816	0.913396	0.160808	0.792713	-0.00600823	1
AT1G05785	-0.0435377	0.996415	0.00580233	0.994924	0.04934	1
AT1G05790	0.0102949	1	0.0963096	0.736974	0.0860146	1
AT1G05800	0.0302642	1	0.424939	0.876724	0.394675	1
AT1G05805	-0.419132	0.0290268	-0.710735	1.79693e-06	-0.291603	0.677347
AT1G05810	-0.0130219	1	-0.138668	0.730896	-0.125646	1
AT1G05820	-0.0810442	0.991656	-0.0610816	0.961191	0.0199626	1
AT1G05830	-0.078729	0.965192	-0.00623201	0.992955	0.072497	1
AT1G05835	-0.0151644	1	0.0259265	0.99266	0.0410908	1
AT1G05840	-0.207636	0.100949	-0.254635	0.0122367	-0.0469991	1
AT1G05850	0.0420728	0.976351	0.0555334	0.847811	0.0134606	1
AT1G05860	0.306323	0.422998	0.472536	0.027817	0.166214	1
AT1G05870	-0.102688	0.97053	-0.363402	0.183654	-0.260715	1
AT1G05880	-0.98709	1	-0.568082	1	0.419008	1
AT1G05890	-0.151505	0.512455	-0.173817	0.25346	-0.0223119	1
AT1G05894	0.715738	0.781108	0.479382	0.811941	-0.236355	1
AT1G05900	-0.0834649	0.973898	0.166788	0.669447	0.250253	0.932661
AT1G05910	0.107859	0.772665	0.0667258	0.824579	-0.0411332	1
AT1G05920	0.995312	1	0	1	-0.952869	1
AT1G05930	-1.42216	1	-1.41331	1	0.00885205	1
AT1G05940	-0.0179458	0.99683	-0.0065227	0.990856	0.0114231	1
AT1G05950	0.063689	0.992436	-0.0138308	0.99266	-0.0775198	1
AT1G05960	0.0598916	0.951363	0.0312471	0.936303	-0.0286445	1
AT1G05970	0.0680793	0.996415	0.0430141	0.977509	-0.0250652	1
AT1G05990	-2.39106	1	0.0685725	1	2.45964	1
AT1G06000	0.288962	0.690226	0.0054296	0.996027	-0.283533	1
AT1G06010	-0.0708309	0.994346	0.0657553	0.958427	0.136586	1
AT1G06020	-0.180399	0.987626	-0.110313	0.964293	0.0700854	1
AT1G06030	0.47579	1	-0.418985	1	-0.894775	1
AT1G06040	-0.0666868	0.9996	-0.375725	0.770335	-0.309038	1
AT1G06050	0.00373338	1	-0.0402464	0.969579	-0.0439798	1
AT1G06060	-0.121936	0.913245	-0.209616	0.463841	-0.0876804	1
AT1G06070	0.00936162	1	0.0531667	0.905767	0.0438051	1
AT1G06080	-0.428924	0.61581	-0.495992	0.338174	-0.0670676	1
AT1G06090	-0.0262857	0.999762	0.00289759	0.99817	0.0291833	1
AT1G06100	2.47074	1	2.47042	1	-0.000318472	1
AT1G06110	-0.0928552	0.930977	-0.0651099	0.884036	0.0277453	1
AT1G06120	0.178866	0.991167	-0.108655	0.968328	-0.287522	1
AT1G06130	0.0677384	0.969397	-0.037049	0.946941	-0.104787	1
AT1G06135	0.470967	0.951993	0.216989	0.94817	-0.253978	1
AT1G06140	-0.00205073	1	0.0574794	0.975569	0.0595301	1
AT1G06148	0.0370976	1	-0.797455	0.820451	-0.834553	1
AT1G06150	-0.131902	0.988822	-0.17108	0.904673	-0.0391777	1
AT1G06160	0.366837	0.824824	0.289821	0.774678	-0.0770162	1
AT1G06170	-0.529589	0.93355	-0.28838	0.916321	0.241208	1
AT1G06180	0.0144043	1	0.0977646	0.944086	0.0833603	1
AT1G06190	-0.0793822	0.973898	-0.153799	0.704408	-0.0744172	1
AT1G06200	-0.0499526	0.9712	0.00493921	0.992897	0.0548919	1
AT1G06210	-0.0126383	1	-0.126947	0.540924	-0.114309	1
AT1G06220	0.122459	0.626605	0.0859899	0.707861	-0.036469	1
AT1G06225	-0.283091	1	-1.27152	1	-0.988429	1
AT1G06230	0.0181005	0.996415	0.0505831	0.824647	0.0324826	1
AT1G06240	0.0205066	1	-0.148427	0.872565	-0.168933	1
AT1G06250	-0.091965	0.996415	0.206378	0.898733	0.298343	1
AT1G06265	-0.0242426	1	-0.317878	0.847699	-0.293635	1
AT1G06270	0.0602729	0.996415	0.15021	0.868816	0.0899369	1
AT1G06290	-0.05488	0.972102	-0.0808087	0.801175	-0.0259287	1
AT1G06310	-0.815039	0.939182	-0.810318	0.819611	0.00472081	1
AT1G06320	0.155335	1	-0.952348	0.79964	-1.10768	1
AT1G06330	0.43563	0.972418	0.383496	0.906609	-0.0521333	1
AT1G06340	-1.55613	1	-1.55364	1	0.00249326	1
AT1G06350	0.361318	0.84097	-0.0782536	0.964354	-0.439571	1
AT1G06360	-0.0540523	1	-0.297025	0.929725	-0.242973	1
AT1G06370	-0.384969	0.660029	-0.22571	0.788849	0.159259	1
AT1G06380	0.252063	0.568538	0.272468	0.353186	0.0204048	1
AT1G06390	0.0607549	0.955967	0.02944	0.945445	-0.031315	1
AT1G06400	-0.100445	0.747865	-0.0273564	0.942215	0.0730884	1
AT1G06410	0.0706798	0.953551	0.0690294	0.847675	-0.00165038	1
AT1G06420	-0.299466	0.968122	-0.170642	0.93873	0.128824	1
AT1G06430	0.0379365	0.996415	-0.163613	0.739084	-0.201549	1
AT1G06440	0.0960708	0.992436	0.11417	0.936361	0.0180995	1
AT1G06450	-0.0563808	0.99284	-0.111453	0.878354	-0.0550717	1
AT1G06460	0.0735056	0.991955	-0.205939	0.760075	-0.279444	1
AT1G06470	0.120957	0.739584	0.00775443	0.990826	-0.113203	1
AT1G06475	-0.429529	0.761903	-0.0715449	0.969579	0.357984	1
AT1G06490	0.00432115	1	0.0115097	0.990147	0.00718855	1
AT1G06500	-0.334814	0.371282	-0.277237	0.430593	0.0575764	1
AT1G06510	-0.135341	0.940989	-0.11644	0.85879	0.018901	1
AT1G06515	0.068745	0.978725	-0.0412387	0.952126	-0.109984	1
AT1G06520	-0.373434	0.253772	-0.533139	0.0168505	-0.159705	1
AT1G06530	0.0450802	0.97141	-0.0143867	0.975569	-0.0594669	1
AT1G06540	-0.13778	0.998916	0.162208	0.969579	0.299988	1
AT1G06550	-0.105328	0.778072	-0.135458	0.429437	-0.0301297	1
AT1G06560	-0.259015	0.653722	-0.219585	0.610015	0.0394299	1
AT1G06570	0.00422077	1	-0.0468404	0.971155	-0.0510611	1
AT1G06580	-0.210072	0.917368	-0.272042	0.67371	-0.0619701	1
AT1G06590	-0.0191684	1	0.0660943	0.914631	0.0852627	1
AT1G06620	0.0900036	0.976351	0.250759	0.491016	0.160755	1
AT1G06630	0.0462504	0.992203	0.0787213	0.887453	0.0324709	1
AT1G06640	-0.0737135	0.97141	0.042338	0.947908	0.116052	1
AT1G06645	-0.0361452	1	0.0952645	0.942215	0.13141	1
AT1G06650	-0.0412506	0.99253	0.0303851	0.967292	0.0716357	1
AT1G06660	-0.190699	0.970269	-0.0939539	0.952831	0.0967453	1
AT1G06670	0.167163	0.212852	0.242444	0.00793077	0.0752805	1
AT1G06680	0.15402	0.986036	-0.174685	0.9152	-0.328705	1
AT1G06690	-0.0523258	0.99253	-0.145343	0.790038	-0.0930168	1
AT1G06700	-0.0113701	0.9996	0.0302212	0.926869	0.0415913	1
AT1G06710	0.0460842	0.996415	-0.0368189	0.975569	-0.0829032	1
AT1G06720	0.0790948	0.982686	0.192567	0.681156	0.113472	1
AT1G06730	0.236787	0.308795	0.111663	0.755661	-0.125124	1
AT1G06740	-0.275383	0.625271	-0.342657	0.2875	-0.0672736	1
AT1G06750	-0.800716	1	-0.380192	0.926591	0.420524	1
AT1G06760	0.068189	0.973127	0.147058	0.623472	0.0788695	1
AT1G06770	0.126483	0.965913	-0.147726	0.833298	-0.274209	1
AT1G06780	-0.0543633	0.969165	0.111645	0.580873	0.166008	0.727353
AT1G06790	0.0409629	0.9996	-0.010305	0.993962	-0.0512679	1
AT1G06800	-0.0694783	0.981696	-0.0214189	0.98202	0.0480594	1
AT1G06810	-0.552049	1	-1.43906	1	-0.887016	1
AT1G06820	0.0878884	0.957476	0.14366	0.664662	0.0557715	1
AT1G06830	0.219943	0.991955	-0.401534	0.884036	-0.621477	1
AT1G06840	-0.0711231	0.954962	-0.148401	0.498624	-0.0772778	1
AT1G06850	0.167315	0.824824	0.410305	0.0280486	0.24299	0.93137
AT1G06860	0.995312	1	1.00411	1	0.00880091	1
AT1G06870	0.114363	0.898131	0.234145	0.257926	0.119782	1
AT1G06890	0.0391293	0.973898	-0.00157256	0.996748	-0.0407018	1
AT1G06900	0.0317434	0.991955	0.0782892	0.795339	0.0465458	1
AT1G06910	-0.244555	0.870479	0.113843	0.909319	0.358398	1
AT1G06920	0.0329453	1	1.39644	1	1.36349	1
AT1G06923	-0.38271	1	-0.153613	0.98158	0.229096	1
AT1G06930	-0.282153	0.973127	-0.639616	0.605263	-0.357464	1
AT1G06950	-0.00572071	1	-0.0802654	0.734594	-0.0745447	1
AT1G06960	0.101651	0.963029	-0.00867475	0.992955	-0.110326	1
AT1G06970	-0.591869	1	-0.348397	0.923994	0.243472	1
AT1G06980	-0.70223	0.003971	-1.03272	7.72421e-07	-0.330489	0.95916
AT1G06990	0	1	0	1	0	1
AT1G07000	-0.0722243	0.973898	0.0142165	0.986806	0.0864408	1
AT1G07010	0.10255	0.988787	-0.42422	0.437483	-0.526769	0.709987
AT1G07020	0.216493	0.538495	0.0741476	0.889023	-0.142346	1
AT1G07030	0.123323	0.864434	0.131842	0.680656	0.00851804	1
AT1G07040	-0.105215	0.95037	-0.239509	0.388994	-0.134294	1
AT1G07050	0.220548	0.991656	-0.488531	0.828728	-0.709079	1
AT1G07060	-1.55342	1	-3.40228	1	-1.84886	1
AT1G07070	0.00490709	1	0.0476761	0.961191	0.042769	1
AT1G07080	0.0392859	0.981245	0.0794917	0.745121	0.0402059	1
AT1G07090	-0.295133	0.362448	-0.267747	0.343161	0.0273862	1
AT1G07110	-0.0300858	0.996415	-0.0592124	0.893895	-0.0291266	1
AT1G07119	0	1	0	1	0	1
AT1G07120	-1.31034	0.593252	-0.562544	0.838772	0.747796	1
AT1G07128	0	1	0	1	0	1
AT1G07130	-0.270486	1	-0.429469	0.920178	-0.158983	1
AT1G07135	-0.390758	0.0393721	-0.480123	0.00235861	-0.0893653	1
AT1G07140	0.0106409	0.9996	0.0522253	0.834768	0.0415845	1
AT1G07150	0.140127	0.921073	-0.162367	0.736804	-0.302494	0.775952
AT1G07160	0.00282194	1	-0.00417098	0.998725	-0.00699292	1
AT1G07170	0.0402212	0.991955	0.0184447	0.980189	-0.0217765	1
AT1G07175	0.292829	0.981595	-0.37881	0.88092	-0.671639	1
AT1G07180	-0.329731	0.982993	-0.782565	0.752308	-0.452834	1
AT1G07200	-0.342977	0.00894045	-0.512007	2.61706e-06	-0.16903	0.95916
AT1G07210	-0.0356201	0.996415	-0.215338	0.448331	-0.179718	1
AT1G07220	-0.0889069	0.951085	-0.106932	0.783702	-0.0180252	1
AT1G07230	-0.0965033	0.8686	-0.13979	0.487762	-0.0432872	1
AT1G07240	0.0115049	1	0.107763	0.703493	0.0962582	1
AT1G07250	0.0369956	0.991167	-0.0815674	0.813293	-0.118563	1
AT1G07260	-0.384535	0.126904	-0.204885	0.577972	0.17965	1
AT1G07270	0.0366663	1	-0.244712	0.884036	-0.281379	1
AT1G07280	-0.0645708	0.996415	-0.217121	0.781592	-0.15255	1
AT1G07290	0.349663	0.772665	0.259234	0.766859	-0.0904294	1
AT1G07300	-0.46846	0.48071	-0.228654	0.791387	0.239806	1
AT1G07310	-0.064893	0.961048	-0.033585	0.943378	0.0313079	1
AT1G07320	0.0745362	0.991631	-0.235654	0.66976	-0.31019	1
AT1G07330	-0.980937	1	-0.394642	1	0.586294	1
AT1G07340	0	1	0	1	0	1
AT1G07350	-0.0901011	0.982993	-0.0606623	0.95426	0.0294389	1
AT1G07360	0.0929818	0.773601	0.100559	0.561744	0.00757752	1
AT1G07370	0.115425	0.980743	-0.0154499	0.992699	-0.130875	1
AT1G07380	-0.0316831	0.996415	-0.0493884	0.943687	-0.0177053	1
AT1G07390	0.149294	0.973898	0.58918	0.130214	0.439887	0.918677
AT1G07400	0.127567	0.996415	-0.56689	0.698685	-0.694457	1
AT1G07410	0.235403	0.850907	-0.0223779	0.987555	-0.257781	1
AT1G07420	0.190132	0.248979	0.17588	0.237873	-0.0142523	1
AT1G07430	-0.149353	0.981696	0.120721	0.935129	0.270074	1
AT1G07440	0.174355	0.965913	-0.388158	0.53754	-0.562514	0.656618
AT1G07450	-0.928266	0.980489	-0.919397	0.909948	0	1
AT1G07470	-0.0422521	0.984666	0.0184632	0.975569	0.0607153	1
AT1G07473	0.183197	1	-0.669557	1	-0.852754	1
AT1G07476	2.89111	1	0	1	-2.84866	1
AT1G07480	-0.00956211	1	-0.125837	0.687426	-0.116275	1
AT1G07500	0.376578	0.875797	0.133174	0.943687	-0.243404	1
AT1G07510	0.0209628	0.996415	-0.038655	0.91436	-0.0596177	1
AT1G07520	-0.0914404	0.961497	-0.199506	0.498645	-0.108065	1
AT1G07530	-0.0850253	0.884066	-0.106308	0.626894	-0.0212829	1
AT1G07540	1.95159	1	0.0423771	1	-1.90921	1
AT1G07550	-0.357672	0.937383	-0.516844	0.660663	-0.159171	1
AT1G07560	-0.290133	0.844989	-0.197705	0.829155	0.0924275	1
AT1G07570	0.0405747	0.996415	0.100206	0.868585	0.0596313	1
AT1G07590	-0.0712046	0.974852	0.128497	0.73786	0.199702	1
AT1G07610	-0.28833	0.371063	-0.0125549	0.990826	0.275775	0.80025
AT1G07615	-0.14336	0.939182	-0.0714089	0.933613	0.0719511	1
AT1G07620	-0.213654	0.948565	-0.00150442	1	0.21215	1
AT1G07630	0.126928	0.866508	0.144783	0.648842	0.0178556	1
AT1G07640	0.338858	0.00964866	0.557084	9.16329e-08	0.218226	0.558396
AT1G07645	-0.461433	0.97141	-0.776569	0.751676	-0.315136	1
AT1G07650	-0.0928299	0.95498	-0.213511	0.418367	-0.120681	1
AT1G07660	-0.00435813	1	-0.0112829	0.987659	-0.00692476	1
AT1G07670	-0.0763762	0.752128	-0.12522	0.178063	-0.0488434	1
AT1G07680	-0.963944	1	0.0493351	1	1.01328	1
AT1G07690	-0.12371	0.99253	-0.373843	0.768648	-0.250133	1
AT1G07700	0.0814109	0.982993	0.256591	0.536519	0.17518	1
AT1G07705	-0.0368034	0.991656	0.000468057	1	0.0372715	1
AT1G07710	-0.608484	0.59224	-0.450826	0.65376	0.157658	1
AT1G07720	-0.0579107	0.991167	-0.0763448	0.907828	-0.018434	1
AT1G07725	0	1	0	1	0	1
AT1G07740	-0.612829	0.289363	-0.187778	0.863462	0.425051	1
AT1G07745	-0.0462285	0.998916	0.0201986	0.990856	0.0664272	1
AT1G07750	-0.0359451	0.996316	-0.116581	0.769061	-0.0806357	1
AT1G07770	-0.0231042	0.995439	0.0339693	0.926328	0.0570735	1
AT1G07780	0.243492	0.736115	0.451573	0.0736172	0.208082	1
AT1G07790	0.0356561	0.996415	0.114701	0.795098	0.0790448	1
AT1G07795	1.51738	1	1.53115	1	0.0137628	1
AT1G07810	-0.018857	0.992436	0.0560699	0.747354	0.0749269	1
AT1G07820	0.0973366	0.951993	0.161777	0.633079	0.0644404	1
AT1G07830	-0.164147	0.847986	0.00445238	0.995687	0.168599	1
AT1G07840	0.170804	0.773601	0.0789702	0.885612	-0.0918334	1
AT1G07850	0.682877	1	1.0467	1	0.363823	1
AT1G07860	0	1	1.91879	1	1.88526	1
AT1G07870	0.0771401	0.969165	0.210936	0.351153	0.133795	1
AT1G07880	-0.473278	0.496375	-0.299412	0.688861	0.173866	1
AT1G07885	0.0464896	1	0.273284	0.962022	0.226794	1
AT1G07890	-0.111138	0.79615	-0.16431	0.322811	-0.0531718	1
AT1G07900	-1.37479	0.0786928	-1.36743	0.0525909	0.00736626	1
AT1G07901	0.0075722	1	-0.102821	0.948549	-0.110393	1
AT1G07910	-0.0421549	0.99253	0.0723596	0.896202	0.114515	1
AT1G07920	0.0283447	0.991955	0.0793706	0.747354	0.0510259	1
AT1G07930	0.0727254	0.945601	0.0796929	0.802273	0.00696752	1
AT1G07940	0.0295159	0.99253	0.0838582	0.777238	0.0543423	1
AT1G07950	-0.0467523	0.991138	-0.117723	0.753629	-0.0709702	1
AT1G07960	0.105816	0.884066	0.0915173	0.800474	-0.0142984	1
AT1G07970	-0.143051	0.906183	-0.0880111	0.88771	0.0550398	1
AT1G07980	-0.036351	0.996415	-0.00206397	0.998638	0.034287	1
AT1G07985	0.229597	0.929341	0.0734512	0.961808	-0.156146	1
AT1G07990	-0.0543905	0.964856	-0.0278056	0.945821	0.0265849	1
AT1G08000	0.0580031	0.991955	-0.231284	0.571761	-0.289287	0.945785
AT1G08005	1.51444	1	1.52353	1	0.0090839	1
AT1G08010	0.0902733	0.954331	-0.0111087	0.990147	-0.101382	1
AT1G08030	0.128542	0.857653	0.191664	0.436005	0.063122	1
AT1G08035	-0.698304	1	0.716932	1	1.41524	1
AT1G08040	0.643849	1.00877e-06	0.805232	4.85987e-11	0.161384	1
AT1G08050	0.139855	0.937383	0.0811514	0.914018	-0.0587038	1
AT1G08060	0.0295562	0.99253	0.103707	0.687382	0.074151	1
AT1G08070	-0.40549	0.822714	-0.469078	0.572399	-0.0635882	1
AT1G08080	0.995313	1	1.00414	1	0.00882813	1
AT1G08090	0.327741	0.963029	0.31154	0.870454	-0.0162017	1
AT1G08110	-0.00583524	1	-0.0126875	0.981897	-0.00685231	1
AT1G08115	0	1	1.00411	1	0.970584	1
AT1G08120	-1.54131	1	-2.4284	1	-0.887087	1
AT1G08125	0.0376526	0.995311	0.0145964	0.986806	-0.0230562	1
AT1G08130	-0.013133	1	0.0315855	0.964293	0.0447186	1
AT1G08140	-1.88867	1	-0.918035	1	0.970634	1
AT1G08150	0	1	1.86242	1	1.82889	1
AT1G08160	-0.0191226	0.996415	0.00658156	0.990856	0.0257042	1
AT1G08165	-0.699544	0.977406	-0.282149	0.968117	0.417395	1
AT1G08170	-1.83759	1	0.991975	1	2.82956	1
AT1G08180	-0.357387	0.378421	-0.426742	0.133815	-0.0693551	1
AT1G08190	0.0166136	0.996415	0.0380652	0.886927	0.0214516	1
AT1G08200	-0.039226	0.987807	-0.0108783	0.986806	0.0283477	1
AT1G08210	-0.0972238	0.947007	-0.126268	0.744708	-0.0290443	1
AT1G08220	0.230298	0.741123	0.228961	0.581231	-0.00133608	1
AT1G08230	-0.189319	0.803138	-0.148825	0.757266	0.0404935	1
AT1G08250	0.146707	0.852469	-0.0281157	0.971236	-0.174823	1
AT1G08260	-0.0977481	0.935385	0.0182058	0.980401	0.115954	1
AT1G08270	0.265764	0.971331	-0.104306	0.967825	-0.370071	1
AT1G08280	-0.0874142	0.9712	0.0586765	0.931793	0.146091	1
AT1G08290	-0.334937	0.841956	-0.25739	0.790038	0.0775469	1
AT1G08300	-0.133377	0.983584	-0.051916	0.977509	0.0814607	1
AT1G08310	-0.384998	0.699898	-0.210154	0.825125	0.174844	1
AT1G08315	-0.0522821	0.980743	0.011442	0.987054	0.0637241	1
AT1G08320	-0.178573	0.63214	-0.127699	0.69824	0.0508746	1
AT1G08340	-0.152276	0.93366	0.102007	0.889834	0.254282	1
AT1G08350	-0.183063	0.734918	-0.269284	0.252132	-0.086222	1
AT1G08360	0.0540494	0.978725	0.0500245	0.913631	-0.00402493	1
AT1G08370	0.0595397	0.932284	-0.0235359	0.949559	-0.0830756	1
AT1G08380	0.088495	0.996415	-0.170735	0.923754	-0.25923	1
AT1G08390	-0.0168376	1	-0.0360258	0.990826	-0.0191882	1
AT1G08400	-0.172929	0.864434	-0.0150232	0.989432	0.157906	1
AT1G08410	0.0232623	0.998916	0.162877	0.610626	0.139615	1
AT1G08420	0.0326299	0.974144	0.0344805	0.884036	0.00185069	1
AT1G08430	-0.0762083	0.985131	-0.129219	0.847811	-0.0530108	1
AT1G08440	0.933213	1	0.0423808	1	-0.890832	1
AT1G08450	0.0641252	0.966378	0.11952	0.630008	0.0553945	1
AT1G08460	-0.117728	0.841097	-0.14195	0.562277	-0.024222	1
AT1G08465	0.103367	0.9996	-0.0879508	0.983636	-0.191318	1
AT1G08470	-0.109039	0.942832	0.0435247	0.950814	0.152563	1
AT1G08480	-0.0564336	0.938148	0.033788	0.910464	0.0902216	1
AT1G08490	0.00914886	1	-0.0222526	0.974364	-0.0314015	1
AT1G08500	0.00952477	1	0.121466	0.798295	0.111941	1
AT1G08510	-0.140591	0.686184	-0.192199	0.252132	-0.0516077	1
AT1G08520	-0.0699897	0.979908	-0.137408	0.747183	-0.0674186	1
AT1G08530	-0.0796177	0.982993	-0.0938992	0.900108	-0.0142815	1
AT1G08540	0.0837952	0.979579	-0.295789	0.344635	-0.379584	0.505231
AT1G08550	-0.212583	0.886882	-0.367333	0.391882	-0.15475	1
AT1G08560	-0.0656053	0.991955	0.034696	0.975569	0.100301	1
AT1G08570	-0.0550211	0.951993	-0.167029	0.150572	-0.112008	1
AT1G08580	0.13959	0.870627	0.201528	0.493001	0.0619376	1
AT1G08590	-0.243217	0.870828	-0.590924	0.0832403	-0.347707	1
AT1G08600	0.0432687	0.982686	0.204912	0.177109	0.161644	0.938494
AT1G08610	-0.137505	0.969165	0.133511	0.871874	0.271015	1
AT1G08620	0.0133809	0.998119	-0.0187568	0.960972	-0.0321377	1
AT1G08630	-0.402421	0.8011	-0.788381	0.111596	-0.38596	1
AT1G08640	0.15924	0.844989	0.216912	0.470575	0.0576718	1
AT1G08650	0.358787	0.0651767	0.330135	0.0759195	-0.0286522	1
AT1G08660	0.101425	0.869358	0.0996028	0.730777	-0.00182208	1
AT1G08670	0.0751514	0.991656	0.107783	0.903665	0.0326317	1
AT1G08680	-0.104935	0.553888	-0.0577215	0.778043	0.0472138	1
AT1G08700	0.0158872	0.999471	-0.0260994	0.960972	-0.0419866	1
AT1G08710	-0.114794	0.954962	-0.0804379	0.907828	0.0343562	1
AT1G08720	-0.0479394	0.991167	-0.121758	0.763054	-0.0738189	1
AT1G08730	0.913367	1	1.45988	0.439058	0.546515	1
AT1G08750	0.101339	0.957915	0.0906348	0.872814	-0.0107038	1
AT1G08760	0.0924564	0.924968	0.133414	0.629082	0.0409575	1
AT1G08770	-0.0503878	0.982686	-0.0242135	0.969579	0.0261744	1
AT1G08780	0.108293	0.951993	0.0173367	0.986202	-0.0909565	1
AT1G08790	0	1	1.9182	1	1.88467	1
AT1G08800	-0.252011	0.477019	-0.147916	0.723201	0.104095	1
AT1G08810	0.447207	0.632028	0.12931	0.926328	-0.317896	1
AT1G08820	-0.132009	0.510902	-0.183688	0.107211	-0.0516793	1
AT1G08830	-0.0300559	0.996415	0.0349066	0.961808	0.0649624	1
AT1G08840	-0.273521	0.772665	-0.179828	0.804713	0.0936925	1
AT1G08845	0.296803	0.690926	0.291327	0.544482	-0.00547506	1
AT1G08860	0.501476	0.901774	-0.17734	0.952831	-0.678815	1
AT1G08880	-0.0227479	0.996415	-0.0159633	0.978468	0.00678453	1
AT1G08890	-0.0442867	0.996415	0.0926808	0.887453	0.136968	1
AT1G08900	-0.108806	0.97053	-0.0794033	0.922059	0.0294029	1
AT1G08910	-0.0814397	0.97141	-0.142706	0.726284	-0.0612665	1
AT1G08920	0.0948881	0.969397	0.076371	0.906609	-0.0185172	1
AT1G08930	-0.385592	0.144184	-0.466174	0.023592	-0.080582	1
AT1G08940	-0.112578	0.958389	-0.149158	0.769035	-0.0365799	1
AT1G08960	0.109808	0.954242	0.091329	0.880111	-0.0184789	1
AT1G08970	-0.056743	0.95453	-0.0055394	0.992631	0.0512036	1
AT1G08980	-0.0279015	0.9996	-0.228896	0.609497	-0.200994	1
AT1G08985	1.86974	1	0	1	-1.82732	1
AT1G08990	-0.274128	0.901673	-0.231258	0.821528	0.0428698	1
AT1G09000	-0.0284615	1	-0.0457321	0.968328	-0.0172705	1
AT1G09010	-0.112432	0.939182	-0.180453	0.601846	-0.0680212	1
AT1G09020	0.000325856	1	-0.00598662	0.990856	-0.00631247	1
AT1G09030	0	1	0	1	0	1
AT1G09040	0.0333526	0.9998	-0.545029	0.129022	-0.578382	0.383573
AT1G09050	-0.0271948	1	-0.0454579	0.978297	-0.0182631	1
AT1G09060	0.0816831	0.963029	-0.0168348	0.982938	-0.0985179	1
AT1G09070	-0.0669066	0.97141	0.0171737	0.981807	0.0840803	1
AT1G09080	0.608294	0.864297	0.783757	0.561744	0.175463	1
AT1G09090	-0.0428361	0.996415	0.157663	0.79035	0.200499	1
AT1G09100	-0.0750957	0.97053	-0.0510947	0.93042	0.024001	1
AT1G09130	0.0972113	0.854675	-0.0137314	0.981298	-0.110943	1
AT1G09140	0.0119337	1	0.0904706	0.755382	0.0785369	1
AT1G09150	0.112632	0.856841	0.0451368	0.926328	-0.0674954	1
AT1G09155	0.567384	0.755832	0.397283	0.778671	-0.170101	1
AT1G09157	0.694372	1	0.945793	0.828649	0.251421	1
AT1G09160	0.0917065	0.889633	0.102546	0.698346	0.0108396	1
AT1G09170	-0.292983	0.960899	-0.0346684	0.990856	0.258314	1
AT1G09176	1.36026	1	1.04376	1	-0.316507	1
AT1G09180	-0.370211	0.963664	-0.20361	0.93873	0.166602	1
AT1G09190	0.135015	0.977953	-0.0393756	0.98158	-0.17439	1
AT1G09195	-0.224895	0.756036	-0.0773356	0.920788	0.147559	1
AT1G09200	0.0974386	0.963832	0.105637	0.842798	0.0081979	1
AT1G09210	0.0703493	0.942832	0.0159951	0.976435	-0.0543542	1
AT1G09220	-0.367645	0.939182	-0.380862	0.812443	-0.013217	1
AT1G09230	0.0115971	1	0.0813898	0.858421	0.0697928	1
AT1G09240	-0.0483825	1	0.104275	0.986202	0.152658	1
AT1G09250	0.313371	0.00143112	0.509741	6.03053e-10	0.19637	0.378323
AT1G09270	0.0721856	0.806117	0.0606478	0.735475	-0.0115378	1
AT1G09280	-0.148492	0.723428	-0.176733	0.422286	-0.0282416	1
AT1G09290	-0.028634	1	-0.224323	0.689043	-0.195689	1
AT1G09300	0.055755	0.99253	-0.00157079	0.99972	-0.0573258	1
AT1G09310	0.0692564	0.986036	0.148989	0.783702	0.0797329	1
AT1G09320	-0.123635	0.958632	-0.212131	0.649382	-0.0884964	1
AT1G09330	0.0729993	0.925311	0.0280723	0.949559	-0.0449271	1
AT1G09340	-0.0800069	0.982426	-0.300824	0.36902	-0.220817	1
AT1G09350	1.86568	0.0058285	2.33215	7.64635e-05	0.466466	1
AT1G09360	0	1	1.9182	1	1.88467	1
AT1G09370	-0.928255	1	-0.919347	1	0	1
AT1G09380	0.0194535	1	0.334539	0.838454	0.315085	1
AT1G09390	-0.0814816	0.97141	-0.256602	0.306401	-0.17512	1
AT1G09400	0.659176	0.755832	0.120343	0.967747	-0.538832	1
AT1G09410	-0.455263	0.803769	0.10259	0.9568	0.557852	1
AT1G09415	0.0151063	1	-0.0625725	0.950631	-0.0776787	1
AT1G09420	-0.0425119	0.997172	-0.113422	0.896635	-0.0709106	1
AT1G09430	-0.0574752	0.979908	-0.018477	0.978468	0.0389982	1
AT1G09440	-0.163187	0.893274	-0.0286452	0.977564	0.134542	1
AT1G09450	-0.25614	0.913396	-0.332156	0.663327	-0.0760161	1
AT1G09460	-0.256924	0.130281	-0.365576	0.00323369	-0.108651	1
AT1G09470	-0.284982	0.96378	-0.586632	0.571761	-0.301651	1
AT1G09480	0.0387587	0.996415	-0.113646	0.858421	-0.152405	1
AT1G09483	-0.928255	1	-0.919361	1	0	1
AT1G09486	0.313153	0.876554	0.498415	0.422151	0.185263	1
AT1G09490	-0.0576158	0.983214	-0.0562284	0.926328	0.00138741	1
AT1G09500	-0.476897	0.976245	0.304388	0.936361	0.781285	1
AT1G09510	0.995312	1	0	1	-0.952889	1
AT1G09520	-0.118883	0.911966	-0.0573074	0.923055	0.0615756	1
AT1G09530	-0.764528	8.26111e-05	-0.82807	6.67347e-06	-0.0635428	1
AT1G09540	-0.0801518	0.992436	0.0570007	0.966843	0.137153	1
AT1G09560	-0.0832055	0.913396	-0.00330274	0.994924	0.0799028	1
AT1G09570	0.136084	0.884066	0.00822895	0.992897	-0.127855	1
AT1G09575	0.334538	0.182365	0.300068	0.205322	-0.0344701	1
AT1G09580	0.211326	0.871643	0.0233744	0.986806	-0.187952	1
AT1G09590	0.191197	0.708259	0.1594	0.661752	-0.0317966	1
AT1G09600	0.105508	0.998174	-0.148466	0.961808	-0.253974	1
AT1G09610	0.316912	0.73482	0.238425	0.736974	-0.0784864	1
AT1G09620	0.00625109	1	0.0461849	0.75535	0.0399338	1
AT1G09630	-0.0590301	0.981815	-0.24674	0.24383	-0.18771	1
AT1G09640	0.0560708	0.939182	0.127489	0.322811	0.0714185	1
AT1G09645	-0.0142279	1	0.0313545	0.951808	0.0455825	1
AT1G09650	0.236674	0.991955	-0.866073	0.678111	-1.10275	1
AT1G09660	0.154496	0.743624	0.077854	0.864315	-0.0766422	1
AT1G09665	1.89119	1	2.47342	1	0.582229	1
AT1G09680	0.0643213	0.999553	0.0705998	0.975818	0.00627853	1
AT1G09690	0.150546	0.754698	0.0740379	0.870246	-0.0765082	1
AT1G09700	-0.0954757	0.966873	0.0910137	0.87118	0.186489	1
AT1G09710	-0.248609	0.66735	-0.368194	0.175144	-0.119585	1
AT1G09720	-0.928255	1	-0.919347	1	0	1
AT1G09730	0.0115123	1	0.0931859	0.706242	0.0816736	1
AT1G09740	-0.0762094	0.930356	-0.0472204	0.90185	0.028989	1
AT1G09750	0.407622	0.696979	-0.0413064	0.982938	-0.448929	1
AT1G09760	-0.0369218	0.991167	-0.0467881	0.917434	-0.00986624	1
AT1G09770	-0.0395308	0.97141	-0.0367721	0.893652	0.00275872	1
AT1G09780	0.175643	0.166952	0.161939	0.167909	-0.0137047	1
AT1G09790	0.995313	1	1.91867	1	0.923358	1
AT1G09794	0.134247	0.971331	0.0270644	0.986028	-0.107183	1
AT1G09795	0.0906358	0.975507	-0.0779787	0.916189	-0.168615	1
AT1G09800	0.0525833	0.997039	-0.151816	0.880294	-0.204399	1
AT1G09810	0.059797	0.991167	0.239444	0.473776	0.179647	1
AT1G09812	0.651853	0.584406	0.452672	0.693528	-0.199182	1
AT1G09815	-0.106151	0.930977	0.034359	0.961191	0.14051	1
AT1G09820	0.0605361	0.996415	-0.31201	0.602127	-0.372546	1
AT1G09830	0.0894784	0.954242	0.176432	0.528769	0.086954	1
AT1G09840	0.162626	0.164163	0.202092	0.022784	0.0394664	1
AT1G09850	0.0196526	0.999553	0.106943	0.778184	0.0872907	1
AT1G09860	-0.662185	0.885227	0.051533	0.990856	0.713718	1
AT1G09870	0.0397599	0.982686	0.118693	0.573005	0.0789328	1
AT1G09880	0.24799	0.923007	0.197115	0.858421	-0.0508752	1
AT1G09890	-0.0386187	0.996415	-0.0379885	0.968969	0.000630257	1
AT1G09900	0.134279	0.965015	-0.126649	0.874672	-0.260929	1
AT1G09910	-0.084971	0.941165	-0.0421591	0.935159	0.0428119	1
AT1G09920	-0.10732	0.756022	-0.0882641	0.707062	0.019056	1
AT1G09930	-0.562817	0.41454	-0.0566932	0.974864	0.506124	0.952591
AT1G09932	-0.103321	0.969743	-0.0394907	0.96628	0.0638301	1
AT1G09940	-0.0945175	0.960899	-0.144433	0.716456	-0.0499151	1
AT1G09950	0.202466	0.858656	0.380837	0.232136	0.178371	1
AT1G09960	-0.125084	0.923007	-0.00604558	0.993937	0.119038	1
AT1G09970	-0.0668505	0.973898	0.0167392	0.982938	0.0835896	1
AT1G09980	0.173294	0.298156	0.182413	0.165902	0.00911922	1
AT1G09995	0.0775539	0.982686	0.170786	0.743615	0.0932321	1
AT1G10000	-0.694673	0.541465	-0.273959	0.858421	0.420715	1
AT1G10010	0.995312	1	0	1	-0.952862	1
AT1G10020	-0.0295129	0.998916	0.226929	0.519664	0.256442	0.958856
AT1G10030	0.0590872	0.991167	-0.0106705	0.99266	-0.0697578	1
AT1G10040	0.599602	0.0437222	0.468931	0.143396	-0.130671	1
AT1G10050	0.0140398	0.99994	0.0361462	0.937248	0.0221064	1
AT1G10060	0.0897962	0.996415	-0.301764	0.813293	-0.39156	1
AT1G10070	-0.183612	0.967604	-0.300087	0.708334	-0.116475	1
AT1G10090	-0.130221	0.918354	-0.0519402	0.943687	0.0782804	1
AT1G10095	-0.209959	0.845074	-0.0832917	0.920788	0.126667	1
AT1G10100	-1.83919	1	-0.86859	1	0.970597	1
AT1G10110	-1.02431	0.4552	-0.638393	0.662771	0.38592	1
AT1G10120	-0.132896	0.946027	-0.248926	0.531142	-0.11603	1
AT1G10130	0.0214962	0.996415	-0.00353878	0.994164	-0.025035	1
AT1G10140	-0.136641	0.876787	-0.0809356	0.880294	0.0557052	1
AT1G10150	-0.0582338	0.991656	-0.124876	0.830308	-0.0666425	1
AT1G10155	-0.537744	0.954962	-0.872842	0.680867	-0.335098	1
AT1G10160	-0.399167	0.0800597	-0.426111	0.0309688	-0.0269441	1
AT1G10170	0.0259762	0.991167	0.0234643	0.948555	-0.00251192	1
AT1G10180	0.0659905	0.965913	-0.0556246	0.892336	-0.121615	1
AT1G10200	-0.0291588	0.992436	-0.140266	0.454755	-0.111107	1
AT1G10210	-0.300433	0.389711	-0.52848	0.00708158	-0.228047	1
AT1G10220	-0.828192	0.631423	-0.678356	0.613213	0.149836	1
AT1G10230	0.146888	0.957669	0.296334	0.524814	0.149446	1
AT1G10240	-0.0901779	0.97141	0.0745571	0.910076	0.164735	1
AT1G10260	-0.928255	1	0.0423293	1	0.970584	1
AT1G10270	0.215762	0.736115	0.314236	0.252132	0.0984738	1
AT1G10280	0.204941	0.885213	0.103913	0.909319	-0.101027	1
AT1G10290	0.133151	0.368602	0.142422	0.204584	0.00927116	1
AT1G10300	-0.228834	0.991167	-0.668652	0.740256	-0.439818	1
AT1G10310	-0.133591	0.917368	-0.214856	0.539464	-0.0812647	1
AT1G10320	-0.0575303	0.982351	-0.0754355	0.877837	-0.0179052	1
AT1G10330	-0.369347	0.876554	0.413675	0.635034	0.783022	0.546502
AT1G10340	-0.490964	0.132044	-0.266982	0.568717	0.223982	1
AT1G10350	-0.154775	0.69097	-0.182238	0.39282	-0.0274631	1
AT1G10360	-0.0901556	0.980674	-0.0799966	0.923055	0.010159	1
AT1G10370	0.0936344	0.996415	0.00242022	1	-0.0912141	1
AT1G10380	0.268396	0.365345	0.293411	0.183834	0.0250145	1
AT1G10385	-1.95943	1	-1.35942	1	0.600013	1
AT1G10390	0.0117934	0.998187	0.0544139	0.781078	0.0426205	1
AT1G10400	-0.147628	0.987807	0.299303	0.803893	0.446931	1
AT1G10410	0.0798351	0.942832	0.113591	0.684357	0.0337556	1
AT1G10417	-0.051073	0.9996	-0.282736	0.782862	-0.231663	1
AT1G10430	0.0909569	0.884066	0.109037	0.65376	0.0180799	1
AT1G10450	-0.0521462	0.982351	0.0856133	0.82962	0.137759	1
AT1G10455	2.92327	1	3.42722	1	0.503954	1
AT1G10460	0.514752	0.17559	0.860591	0.00054077	0.345839	0.978742
AT1G10470	-0.0869471	0.936311	-0.00284479	0.996027	0.0841023	1
AT1G10480	-0.476641	0.395122	-0.720136	0.0295831	-0.243494	1
AT1G10490	0.00519081	1	-0.0532842	0.951571	-0.058475	1
AT1G10500	-0.123081	0.856841	-0.0723155	0.872565	0.0507659	1
AT1G10510	-0.109223	0.90025	-0.0921784	0.820302	0.0170449	1
AT1G10520	-0.364452	0.783981	-0.208989	0.843345	0.155463	1
AT1G10522	0.0947026	0.982593	0.0625802	0.952927	-0.0321223	1
AT1G10530	-0.0533153	1	-0.572345	0.551703	-0.51903	1
AT1G10540	-0.524676	0.936167	0.0864174	0.982938	0.611094	1
AT1G10550	0.0271254	1	0.0270813	0.985148	-4.4099e-05	1
AT1G10560	-0.032346	0.998916	-0.0220887	0.985193	0.0102573	1
AT1G10570	-0.110551	0.923007	-0.0511615	0.933081	0.0593892	1
AT1G10580	0.0107023	1	-0.0120355	0.985508	-0.0227378	1
AT1G10585	0.0453929	1	-0.693048	0.906974	-0.738441	1
AT1G10586	0	1	0	1	0	1
AT1G10590	-0.0208763	0.99253	-0.0075032	0.986688	0.0133731	1
AT1G10600	-0.0526757	0.996062	-0.367156	0.248224	-0.31448	0.94609
AT1G10610	-0.0914633	0.97053	-0.12701	0.803861	-0.0355472	1
AT1G10620	1.86974	1	0	1	-1.82729	1
AT1G10630	0.0991042	0.719388	0.0252777	0.944086	-0.0738265	1
AT1G10640	0.541225	0.805684	0.302077	0.864003	-0.239148	1
AT1G10650	0.0176526	0.999471	0.0467316	0.923055	0.029079	1
AT1G10652	0	1	1.00411	1	0.970584	1
AT1G10657	0.771248	0.84962	0.0429791	0.992955	-0.728269	1
AT1G10660	-0.0732719	0.945773	-0.0527684	0.891748	0.0205035	1
AT1G10670	0.00910679	1	-0.0207015	0.950774	-0.0298083	1
AT1G10680	-0.928266	0.980743	0.93723	0.899449	1.8655	1
AT1G10682	-0.074661	0.991167	-0.0794215	0.93508	-0.00476052	1
AT1G10690	-0.0209514	1	-0.273129	0.829448	-0.252177	1
AT1G10700	-0.00427799	1	0.14163	0.657735	0.145908	1
AT1G10710	2.73491	1	1.93399	1	-0.800916	1
AT1G10720	-0.111793	0.770174	-0.0935976	0.708872	0.0181954	1
AT1G10730	0.00295808	1	0.131563	0.774469	0.128605	1
AT1G10740	0.124082	0.939182	0.314811	0.215451	0.190729	1
AT1G10747	2.49071	1	0	1	-2.44828	1
AT1G10750	0.213526	0.853536	0.397914	0.212159	0.184388	1
AT1G10760	-0.0220892	1	-0.14739	0.844102	-0.125301	1
AT1G10770	-1.28476	0.772665	-1.6911	0.478309	-0.406333	1
AT1G10780	-0.198027	0.914437	-0.24223	0.69435	-0.0442032	1
AT1G10790	-0.300277	0.94783	-0.00164152	1	0.298635	1
AT1G10800	-0.367168	0.850907	-0.339522	0.730114	0.0276454	1
AT1G10810	-0.138208	0.980058	0.0341379	0.985148	0.172346	1
AT1G10820	-0.0336096	0.996415	0.0214393	0.977509	0.0550489	1
AT1G10830	-0.00808186	1	-0.0527715	0.941262	-0.0446896	1
AT1G10840	-0.0122263	0.996415	0.0632284	0.659855	0.0754547	1
AT1G10850	-0.00592686	1	-0.196364	0.60608	-0.190437	1
AT1G10865	-0.114246	0.944107	-0.0623276	0.927252	0.051918	1
AT1G10870	0.0796353	0.947892	0.0661525	0.872814	-0.0134828	1
AT1G10880	0.995312	1	1.00414	1	0.00882659	1
AT1G10890	0.00169473	1	0.101071	0.758445	0.099376	1
AT1G10900	0.575867	3.45166e-07	0.714322	1.53026e-11	0.138455	1
AT1G10910	0.1026	0.936167	-0.0158785	0.984996	-0.118479	1
AT1G10920	-0.412696	0.595914	-0.188657	0.842115	0.224039	1
AT1G10930	0.184846	0.91494	-0.103507	0.909887	-0.288353	1
AT1G10940	0.045506	0.973898	0.0858605	0.704408	0.0403545	1
AT1G10950	0.0267679	0.982351	-0.0129831	0.968328	-0.0397511	1
AT1G10960	0.0686178	0.996415	-0.372865	0.589854	-0.441483	1
AT1G10970	-0.125431	0.969397	-0.0720662	0.942215	0.0533653	1
AT1G10980	-3.37718	1	-3.3683	1	0	1
AT1G10990	-0.231656	0.935723	0.0257756	0.989118	0.257431	1
AT1G11000	0.551245	0.00400045	0.695358	3.20929e-05	0.144113	1
AT1G11020	0.071036	0.973898	0.1337	0.714103	0.0626639	1
AT1G11040	-0.531889	1	-1.41249	1	-0.880605	1
AT1G11050	-0.119332	0.887094	-0.0712618	0.88515	0.0480707	1
AT1G11060	-0.0677779	0.964856	-0.0908293	0.782862	-0.0230515	1
AT1G11070	-0.499115	0.963029	-0.339769	0.914195	0.159346	1
AT1G11080	-1.28324	0.35759	-0.791142	0.582032	0.492097	1
AT1G11090	0.236383	0.422998	0.30105	0.109996	0.0646672	1
AT1G11100	-0.193791	0.958916	0.0934091	0.9466	0.2872	1
AT1G11110	0	1	1.00413	1	0.970597	1
AT1G11112	0.519649	1	1.04594	0.766275	0.526287	1
AT1G11120	0.607195	0.000766412	1.10717	6.70234e-14	0.49998	0.0250475
AT1G11125	1.52942	7.18177e-06	2.02296	3.89567e-11	0.493546	0.766422
AT1G11130	0.0887161	0.981301	0.241906	0.574099	0.15319	1
AT1G11150	0.0420149	0.998119	-0.0217532	0.987659	-0.0637682	1
AT1G11160	-0.0107625	1	0.18314	0.899622	0.193903	1
AT1G11170	0.239229	0.908661	0.231247	0.783317	-0.00798295	1
AT1G11175	-0.230086	0.784398	-0.62639	0.00647172	-0.396304	0.648546
AT1G11180	0.00243829	1	0.167756	0.752573	0.165318	1
AT1G11185	0.0124775	1	-0.0661391	0.921076	-0.0786166	1
AT1G11190	-0.0571774	0.99284	0.116633	0.872809	0.173811	1
AT1G11200	-0.0240584	0.998916	0.0404815	0.950531	0.0645399	1
AT1G11210	-0.00828167	1	0.107981	0.863186	0.116262	1
AT1G11220	0.0818293	0.996415	0.326861	0.709889	0.245032	1
AT1G11240	0.0999179	0.930977	0.0602643	0.906974	-0.0396536	1
AT1G11250	-0.201071	1	-0.482942	1	-0.281871	1
AT1G11260	-0.417314	0.101906	-0.477243	0.0231815	-0.0599286	1
AT1G11265	0.929394	1	1.51408	1	0.584686	1
AT1G11270	-0.110061	0.980743	-0.227207	0.737061	-0.117147	1
AT1G11280	0.234766	0.541465	0.190294	0.572129	-0.0444721	1
AT1G11290	0.329789	0.841097	0.246259	0.805087	-0.0835292	1
AT1G11300	0.0719896	0.99253	-0.152557	0.866261	-0.224547	1
AT1G11310	-0.399905	0.0791044	-0.505681	0.00518871	-0.105777	1
AT1G11320	-0.235588	0.884066	-0.081579	0.944777	0.154009	1
AT1G11330	-0.283895	0.60964	-0.287151	0.453267	-0.00325606	1
AT1G11340	-0.579356	0.905096	0.167922	0.954855	0.747278	1
AT1G11350	-0.212357	0.549503	-0.236681	0.313441	-0.024324	1
AT1G11360	0.0435358	0.979903	-0.0360383	0.929746	-0.0795741	1
AT1G11362	-0.544243	0.978725	-0.687545	0.868503	-0.143302	1
AT1G11370	0.918763	1	-0.919343	1	-1.83811	1
AT1G11380	-0.167661	0.736115	-0.280957	0.147633	-0.113295	1
AT1G11390	0.0942693	0.969397	0.269647	0.318668	0.175378	1
AT1G11400	0.123779	0.803125	0.154936	0.481705	0.0311568	1
AT1G11410	0.408107	0.455557	0.590338	0.0599527	0.182231	1
AT1G11420	-0.339922	0.695314	-0.0219757	0.989025	0.317946	1
AT1G11430	0.108143	0.913396	0.00236134	0.997497	-0.105782	1
AT1G11440	0.228228	0.453968	0.213399	0.390127	-0.0148298	1
AT1G11450	-0.644446	0.000352271	-0.662229	0.000128433	-0.0177832	1
AT1G11460	-0.703015	0.971348	-0.279314	0.964101	0.423701	1
AT1G11475	0.0432819	0.996183	0.154399	0.726284	0.111117	1
AT1G11480	-0.0117772	0.998502	0.044914	0.843036	0.0566912	1
AT1G11482	0.462878	1	0.0792691	1	-0.383609	1
AT1G11490	-0.395074	1	-0.649195	0.823379	-0.254121	1
AT1G11500	-0.140712	0.995067	-0.137033	0.957287	0.00367905	1
AT1G11510	0	1	1.00411	1	0.970584	1
AT1G11530	-0.148703	0.876846	-0.116695	0.820647	0.032008	1
AT1G11540	0.0188566	1	-0.0918014	0.973859	-0.110658	1
AT1G11545	0.463205	0.00268146	0.416496	0.00661471	-0.0467087	1
AT1G11550	0	1	1.91938	1	1.88586	1
AT1G11560	-0.741734	1	-0.728307	1	0.0134272	1
AT1G11570	-0.258087	0.948565	-0.250349	0.842115	0.0077382	1
AT1G11572	-3.37622	1	-1.49687	1	1.87935	1
AT1G11580	-0.00588363	1	-0.116891	0.795898	-0.111007	1
AT1G11590	-2.38483	1	-1.41419	1	0.970637	1
AT1G11592	0.00738402	1	0.0871452	0.876934	0.0797612	1
AT1G11600	0.106553	0.994927	-0.211506	0.885338	-0.318059	1
AT1G11610	0	1	0	1	0	1
AT1G11620	-2.38056	1	-2.37164	1	0	1
AT1G11630	0.273013	0.467209	0.184541	0.648066	-0.0884715	1
AT1G11650	-0.0587551	0.873317	-0.0207206	0.941274	0.0380345	1
AT1G11655	-0.546534	1	0.461145	1	1.00768	1
AT1G11660	0.122173	0.760789	0.216379	0.130614	0.0942056	1
AT1G11670	-0.00200881	1	0.0975236	0.868104	0.0995324	1
AT1G11680	-0.016977	0.998314	-0.0375604	0.926591	-0.0205834	1
AT1G11690	-0.928255	1	-0.919347	1	0	1
AT1G11700	-0.513609	0.191628	-0.823678	0.00218964	-0.31007	1
AT1G11710	0.0779052	0.991167	0.344887	0.384733	0.266982	1
AT1G11720	0.181482	0.913396	0.0834314	0.930438	-0.0980502	1
AT1G11730	-0.0296755	1	0.7015	0.127979	0.731175	0.422232
AT1G11735	1.62548	5.2759e-06	2.0675	2.81068e-10	0.442011	1
AT1G11740	0.721688	0.0352659	0.770189	0.0113899	0.0485005	1
AT1G11750	-0.0873952	0.92078	-0.305959	0.0175699	-0.218564	0.599863
AT1G11755	0.0188014	1	0.0298163	0.978297	0.0110149	1
AT1G11760	-0.0227104	1	-0.160328	0.763054	-0.137618	1
AT1G11770	0	1	0	1	0	1
AT1G11780	0.166943	0.716867	0.220986	0.314023	0.0540439	1
AT1G11785	0.0329519	1	-0.406608	0.932595	-0.43956	1
AT1G11790	-0.0568261	0.989331	0.11238	0.8241	0.169206	1
AT1G11800	-0.0757292	0.979903	-0.0942822	0.872814	-0.0185529	1
AT1G11810	-0.963465	1	-0.977716	1	-0.0142509	1
AT1G11820	0.0877936	0.868653	0.0133035	0.979974	-0.07449	1
AT1G11840	-0.0423413	0.991955	0.0460941	0.936303	0.0884354	1
AT1G11850	0.309595	0.984507	-0.102987	0.982938	-0.412582	1
AT1G11860	0.0038186	1	-0.232913	0.547959	-0.236731	1
AT1G11870	-0.0944574	0.969397	-0.104355	0.856215	-0.00989799	1
AT1G11880	-0.0234129	1	-0.105546	0.896189	-0.0821329	1
AT1G11890	0.0702219	0.954056	0.0962516	0.739991	0.0260298	1
AT1G11900	-0.157428	0.981815	-0.665586	0.258781	-0.508158	1
AT1G11905	0.0731957	0.974852	0.163754	0.624481	0.0905582	1
AT1G11910	-0.0931195	0.866156	-0.0667054	0.834984	0.0264142	1
AT1G11915	0.0858988	0.992436	0.150854	0.884036	0.0649552	1
AT1G11920	0.0293705	1	-0.544168	1	-0.573539	1
AT1G11925	0.0280724	1	0.0281799	0.994164	0.000107475	1
AT1G11930	0.0244294	0.996415	0.0176641	0.976041	-0.00676524	1
AT1G11940	-0.0216883	1	0.213411	0.753629	0.2351	1
AT1G11950	0.0117311	1	0.0692675	0.928011	0.0575364	1
AT1G11960	0.0238622	1	0.19985	0.693528	0.175987	1
AT1G11990	0.995323	1	2.48485	1	1.48953	1
AT1G12000	0.0209741	0.999471	-0.0332654	0.96253	-0.0542395	1
AT1G12010	-0.0630338	0.995311	-0.0963898	0.921944	-0.033356	1
AT1G12013	1.89127	1	1.88167	1	-0.00960154	1
AT1G12020	-0.380387	0.38861	-0.283579	0.527696	0.0968077	1
AT1G12030	0.627437	1	0.92541	0.788258	0.297973	1
AT1G12040	-0.238721	0.939182	-0.00474837	0.998399	0.233972	1
AT1G12050	0.028601	0.996415	-0.117767	0.686996	-0.146368	1
AT1G12060	0.101059	0.991138	0.22549	0.795339	0.124431	1
AT1G12064	-0.120919	1	-0.351065	0.936303	-0.230146	1
AT1G12070	0.458665	0.603505	0.657016	0.140537	0.198351	1
AT1G12080	0.214261	0.554094	0.122663	0.763331	-0.0915974	1
AT1G12090	-0.109988	0.957767	-0.126914	0.814825	-0.0169255	1
AT1G12100	-2.92022	1	-1.45267	1	1.46755	1
AT1G12110	-0.175657	0.856841	-0.0479927	0.955663	0.127664	1
AT1G12120	-0.0338365	0.98845	-0.0908341	0.707404	-0.0569977	1
AT1G12130	-0.610806	0.969397	-1.00817	0.730777	-0.397368	1
AT1G12140	0.0358511	0.991656	0.00486188	0.993046	-0.0309893	1
AT1G12150	0.100864	0.999762	0.407304	0.874074	0.30644	1
AT1G12160	-0.0578502	0.99683	0.0218209	0.990856	0.0796711	1
AT1G12180	-0.928256	1	-0.919344	1	0	1
AT1G12200	-0.585791	0.000386316	-0.792153	9.02426e-08	-0.206361	1
AT1G12210	-0.208383	0.928577	-0.150625	0.876813	0.0577574	1
AT1G12211	2.23859	1	0.95468	1	-1.28391	1
AT1G12220	0.00506858	1	0.0188984	0.989067	0.0138298	1
AT1G12230	0.056879	0.984666	-0.127931	0.755382	-0.18481	1
AT1G12240	-0.130978	0.977264	-0.288109	0.658027	-0.157131	1
AT1G12244	0.00762805	1	0.0954048	0.943687	0.0877768	1
AT1G12250	0.297977	0.755832	-0.343942	0.533574	-0.64192	0.228194
AT1G12260	-0.0010232	1	-0.0561605	0.944693	-0.0551373	1
AT1G12270	-0.0302905	0.991656	0.0172172	0.973009	0.0475077	1
AT1G12280	0.262466	0.834637	0.482741	0.178369	0.220275	1
AT1G12290	0.134124	0.969743	0.218091	0.735385	0.0839672	1
AT1G12300	0.0958042	0.992436	-0.115835	0.935966	-0.211639	1
AT1G12310	0.00302166	1	-0.0641376	0.838538	-0.0671592	1
AT1G12320	-0.694532	0.172532	-0.844512	0.0321741	-0.149981	1
AT1G12330	0.133589	0.930294	-0.0727366	0.920178	-0.206325	1
AT1G12350	-0.0493525	0.992734	0.0535134	0.947908	0.102866	1
AT1G12360	-0.0155069	0.998916	0.00245927	0.99569	0.0179662	1
AT1G12370	-0.15893	0.982282	-0.281197	0.812443	-0.122267	1
AT1G12380	-0.231713	0.806364	-0.264209	0.562277	-0.0324959	1
AT1G12390	-0.0278415	0.997172	-0.130239	0.759931	-0.102398	1
AT1G12400	0.255951	0.421575	0.207348	0.493377	-0.0486031	1
AT1G12410	0.0315189	0.986036	-0.201069	0.0601206	-0.232588	0.105051
AT1G12420	-0.255001	0.519286	-0.295047	0.253077	-0.0400458	1
AT1G12430	-0.33653	0.0979731	-0.273056	0.193467	0.063474	1
AT1G12440	-0.131826	0.510913	-0.124925	0.42394	0.00690156	1
AT1G12450	-0.0946503	0.948565	-0.251047	0.24727	-0.156397	1
AT1G12460	0.375445	0.471988	0.408871	0.262146	0.0334262	1
AT1G12470	0.0235138	0.995311	0.0390695	0.911213	0.0155557	1
AT1G12480	0.617755	0.910657	0.624466	0.769197	0.00671067	1
AT1G12490	-1.69487	1	-2.28583	1	-0.59096	1
AT1G12500	0.000170703	1	-0.117936	0.49774	-0.118107	1
AT1G12520	-0.0905319	0.950137	-0.0137584	0.986668	0.0767735	1
AT1G12530	-0.121096	0.951993	-0.186926	0.677981	-0.0658293	1
AT1G12540	-0.928266	1	-0.919406	1	0	1
AT1G12550	-0.0103206	1	-0.012089	0.993046	-0.00176838	1
AT1G12560	-0.51358	0.405263	-0.356843	0.580805	0.156737	1
AT1G12570	1.84722	1	2.50327	0.322382	0.656051	1
AT1G12580	0.488275	5.96674e-14	0.788754	4.63697e-38	0.300479	8.83461e-05
AT1G12600	0.092482	0.996415	0.064362	0.976884	-0.02812	1
AT1G12610	0.00272273	1	0.151807	0.778981	0.149085	1
AT1G12620	0.142342	0.954962	0.0457228	0.968211	-0.0966192	1
AT1G12630	-0.289441	0.996415	0.722478	0.846757	1.01192	1
AT1G12640	0.0611807	0.95037	0.107927	0.584391	0.046746	1
AT1G12650	0.212691	0.400558	0.255621	0.135256	0.0429294	1
AT1G12663	2.45412	1	0	1	-2.41166	1
AT1G12665	-2.89241	1	-0.970979	1	1.92143	1
AT1G12669	-0.382571	1	-0.147785	1	0.234785	1
AT1G12670	1.10246	1	0.958152	1	-0.144305	1
AT1G12672	-0.680201	1	-0.092134	1	0.588067	1
AT1G12680	-0.16486	0.651686	-0.145899	0.582432	0.0189609	1
AT1G12700	-0.261833	0.8814	-0.163008	0.872814	0.0988249	1
AT1G12710	-0.216621	0.766698	-0.364896	0.181164	-0.148275	1
AT1G12730	-0.505876	0.206997	-0.351371	0.446405	0.154505	1
AT1G12740	-0.244779	0.787087	-0.483194	0.0954253	-0.238415	1
AT1G12750	0.0795369	0.957669	0.103611	0.773623	0.0240737	1
AT1G12760	-0.0100131	1	0.0958032	0.703145	0.105816	1
AT1G12770	0.00870024	1	-0.0755021	0.898733	-0.0842023	1
AT1G12775	-0.4265	0.742324	0.00453877	0.998725	0.431039	1
AT1G12780	-0.104169	0.948021	-0.1804	0.586309	-0.0762308	1
AT1G12790	-0.0592927	0.991656	-0.328855	0.254247	-0.269562	0.994902
AT1G12800	-0.104313	0.976223	-0.316441	0.413313	-0.212128	1
AT1G12805	-2.43994	0.284147	-1.26629	0.612102	1.17365	1
AT1G12810	-0.0702787	0.960028	-0.117796	0.663327	-0.0475174	1
AT1G12820	0.0967492	0.91494	0.0345947	0.950531	-0.0621545	1
AT1G12830	0.210044	0.743624	0.226098	0.530991	0.016054	1
AT1G12840	0.0478934	0.960899	0.0565224	0.814855	0.00862897	1
AT1G12845	0.312336	0.866921	0.320518	0.705667	0.00818147	1
AT1G12850	0.137537	0.461585	0.0719172	0.76608	-0.0656196	1
AT1G12855	-1.79636	1	0.0325507	1	1.82891	1
AT1G12860	0.0050657	1	-0.170094	0.882347	-0.17516	1
AT1G12870	0.995323	1	0	1	-0.952924	1
AT1G12880	0.107021	0.969397	0.148777	0.791949	0.041756	1
AT1G12890	0.718459	0.951993	-0.38125	0.943687	-1.09971	1
AT1G12900	0.00964954	1	-0.27652	0.819476	-0.286169	1
AT1G12910	0.0829877	0.942532	0.0212213	0.973538	-0.0617663	1
AT1G12920	0.0192585	0.995984	0.0885591	0.576363	0.0693005	1
AT1G12930	-0.136703	0.704504	-0.226011	0.127703	-0.0893076	1
AT1G12940	-1.79711	1	-1.78819	1	0	1
AT1G12950	-0.284031	0.836071	-0.364282	0.509657	-0.0802507	1
AT1G12970	-0.00120571	1	-0.184622	0.519346	-0.183416	1
AT1G12980	-0.171087	1	-0.389592	1	-0.218504	1
AT1G12990	0.185415	0.366653	0.340505	0.00230885	0.15509	0.955198
AT1G13000	0.0855635	0.951085	0.123347	0.708203	0.0377835	1
AT1G13020	-0.0116433	1	-0.0496366	0.876254	-0.0379933	1
AT1G13030	0.0868862	0.991167	0.017746	0.990856	-0.0691402	1
AT1G13040	-0.0963911	0.987205	-0.360668	0.49475	-0.264277	1
AT1G13050	-0.126434	0.981439	-0.0829037	0.950454	0.0435305	1
AT1G13060	-0.0142887	0.997769	-0.0171073	0.96614	-0.0028186	1
AT1G13070	1.38214	1	0.673398	1	-0.708742	1
AT1G13080	-0.587441	0.0446635	-0.481701	0.110415	0.10574	1
AT1G13090	-0.153835	0.797846	-0.183759	0.515548	-0.0299248	1
AT1G13100	-0.0202198	1	-0.08103	0.907887	-0.0608102	1
AT1G13110	-0.0973224	0.9712	-0.256576	0.442147	-0.159254	1
AT1G13120	0.000698324	1	-0.112579	0.743329	-0.113278	1
AT1G13130	-0.00676344	1	-0.08585	0.931167	-0.0790865	1
AT1G13140	-0.410633	0.909779	0.116424	0.961471	0.527056	1
AT1G13145	-0.0681365	0.998916	-0.00706977	0.997497	0.0610667	1
AT1G13150	0.0767013	0.997769	0.0840118	0.969579	0.00731048	1
AT1G13160	0.119212	0.758166	0.218469	0.105124	0.0992566	1
AT1G13170	0.0641017	0.965249	0.0146146	0.98158	-0.0494871	1
AT1G13180	-0.00524411	1	-0.10922	0.781592	-0.103976	1
AT1G13190	-0.0266703	0.996415	0.0645134	0.867585	0.0911837	1
AT1G13195	0.120385	0.884066	0.447046	0.00134207	0.326661	0.217011
AT1G13200	0.576413	1	-0.0412428	1	-0.617656	1
AT1G13210	0.0316532	0.998916	-0.0337033	0.975291	-0.0653565	1
AT1G13220	0.0960114	0.960899	0.0156114	0.986806	-0.0804	1
AT1G13230	-0.706948	1	0.419441	1	1.12639	1
AT1G13245	2.02412	9.56013e-26	2.6704	7.69687e-46	0.646277	0.0410982
AT1G13250	0.364172	0.592426	0.483239	0.195148	0.119067	1
AT1G13260	-0.0738283	0.971331	-0.135815	0.692605	-0.0619864	1
AT1G13270	-0.0632453	0.994437	-0.243667	0.665753	-0.180422	1
AT1G13280	0.295728	0.00156067	0.328399	0.00013475	0.0326717	1
AT1G13300	-0.473078	0.133077	-0.418348	0.165764	0.0547303	1
AT1G13310	-0.000277305	1	-0.567043	1	-0.566766	1
AT1G13320	0.0291857	0.985519	0.00061813	0.99972	-0.0285676	1
AT1G13330	-0.0244643	1	-0.0450527	0.986202	-0.0205884	1
AT1G13340	0.18309	0.782707	0.10043	0.858721	-0.0826607	1
AT1G13350	0.00679611	1	-0.0413268	0.922059	-0.0481229	1
AT1G13360	0.23318	0.370161	0.234337	0.259862	0.00115756	1
AT1G13370	0.544278	1	-0.659578	1	-1.20386	1
AT1G13380	0.218337	0.535598	0.195278	0.493377	-0.0230594	1
AT1G13390	0.259904	0.235634	0.289563	0.0931117	0.0296587	1
AT1G13400	4.06729	1	2.89373	1	-1.17356	1
AT1G13410	-0.361968	0.786637	-0.210764	0.839975	0.151204	1
AT1G13420	-0.611049	0.0145393	-0.451349	0.104174	0.159701	1
AT1G13430	0.495692	0.255338	0.623218	0.0464444	0.127526	1
AT1G13440	0.0186745	0.997172	0.0155939	0.977509	-0.00308062	1
AT1G13448	0.288872	0.969397	0.393545	0.801175	0.104672	1
AT1G13450	-0.128232	0.7239	-0.0859963	0.773894	0.0422355	1
AT1G13460	0.0497286	0.990003	0.0780215	0.877289	0.0282929	1
AT1G13470	0.995321	1	0	1	-0.952911	1
AT1G13480	-0.345267	0.939182	-0.299031	0.853471	0.0462362	1
AT1G13490	0.93863	1	0.0423693	1	-0.896261	1
AT1G13500	-0.752384	0.716757	-0.624492	0.664201	0.127891	1
AT1G13510	-0.394797	0.80423	-0.584514	0.352292	-0.189717	1
AT1G13520	-0.514038	0.436327	-0.204359	0.836541	0.309679	1
AT1G13530	-0.422367	0.70031	-0.275488	0.769752	0.146879	1
AT1G13540	-0.0233174	1	0.0245811	0.992201	0.0478984	1
AT1G13550	-0.224953	0.97141	0.212603	0.887453	0.437556	1
AT1G13560	0.0358166	0.99683	0.13841	0.798295	0.102593	1
AT1G13570	-0.18181	0.710722	-0.132508	0.732392	0.0493029	1
AT1G13580	0.0316254	0.998501	-0.167457	0.738491	-0.199082	1
AT1G13590	-0.120427	0.969397	-0.13422	0.851445	-0.0137926	1
AT1G13600	-0.133438	0.99253	-0.572456	0.598553	-0.439018	1
AT1G13609	1.26241	0.862922	0.779361	0.873598	-0.483048	1
AT1G13610	0.995324	0.977264	1.00419	0.8984	0.00886305	1
AT1G13620	1.61748	0.814095	1.0406	0.842819	-0.576879	1
AT1G13630	0.122202	0.989773	0.0960828	0.95225	-0.0261188	1
AT1G13635	-0.109568	0.972102	-0.169127	0.783027	-0.0595596	1
AT1G13640	-0.188405	0.0941791	-0.26569	0.00180371	-0.0772852	1
AT1G13650	2.89119	1	1.00418	0.900108	-1.88701	1
AT1G13660	0.995312	1	0	1	-0.952876	1
AT1G13670	0.309983	0.0810278	0.128456	0.693528	-0.181527	1
AT1G13680	0.0335288	1	0.949656	1	0.916127	1
AT1G13690	0.0143911	1	0.0321524	0.972126	0.0177613	1
AT1G13700	-0.540681	0.0293091	-0.420239	0.111826	0.120442	1
AT1G13710	0.314805	0.976268	-0.315998	0.897154	-0.630803	1
AT1G13730	0.122545	0.939182	0.00618401	0.99421	-0.116361	1
AT1G13740	0.0880741	0.939182	-0.122597	0.691943	-0.210671	0.762824
AT1G13750	-0.0863823	0.991656	-0.0176161	0.991776	0.0687662	1
AT1G13770	-0.0723773	0.984666	0.0642208	0.936361	0.136598	1
AT1G13780	-0.249043	0.864809	-0.174839	0.838081	0.0742042	1
AT1G13790	0.790997	0.123036	0.0680685	0.974058	-0.722928	0.493304
AT1G13800	-0.339677	0.932284	-0.638859	0.485164	-0.299183	1
AT1G13810	0.190788	0.943144	0.0334031	0.983399	-0.157385	1
AT1G13820	-0.0839051	0.980743	-0.168451	0.748453	-0.0845464	1
AT1G13830	-0.349071	0.651099	-0.351094	0.491802	-0.00202255	1
AT1G13860	0.0561679	0.99253	0.0963035	0.898733	0.0401356	1
AT1G13870	-0.0527936	0.982686	0.0697451	0.876817	0.122539	1
AT1G13880	0.00548505	1	0.0832743	0.69824	0.0777892	1
AT1G13890	0.0398471	1	-0.825739	1	-0.865586	1
AT1G13900	-0.169615	0.509291	-0.179639	0.320903	-0.0100241	1
AT1G13910	-0.311746	0.540867	0.00599497	0.995464	0.317741	0.942362
AT1G13920	0.029096	0.998174	-0.0796238	0.899449	-0.10872	1
AT1G13930	0.002966	1	-0.0444902	0.970218	-0.0474562	1
AT1G13940	-0.0944691	0.909222	-0.168506	0.421013	-0.0740374	1
AT1G13950	-0.103882	0.973898	0.136719	0.836541	0.240601	1
AT1G13960	-0.075629	0.958632	-0.0334753	0.951524	0.0421536	1
AT1G13970	0.38769	0.519286	0.374053	0.416324	-0.0136373	1
AT1G13980	0.011409	1	-0.00504716	0.992897	-0.0164562	1
AT1G13990	0.200186	0.71771	0.228516	0.450848	0.02833	1
AT1G14000	-0.0650601	0.948565	0.026008	0.953345	0.0910681	1
AT1G14010	0.156947	0.712815	0.148445	0.585635	-0.00850167	1
AT1G14020	0.0082176	1	-0.043481	0.93873	-0.0516986	1
AT1G14030	-0.199891	0.945916	-0.518243	0.253789	-0.318353	1
AT1G14040	-0.334164	0.0505832	-0.340745	0.0269793	-0.0065803	1
AT1G14048	0	1	1.00413	1	0.970598	1
AT1G14060	0.239774	0.771758	0.176912	0.764916	-0.0628618	1
AT1G14070	0.0302976	0.997243	0.0444122	0.954571	0.0141146	1
AT1G14071	0.625815	1	-0.551609	1	-1.17742	1
AT1G14080	0.166015	0.982282	0.309377	0.783702	0.143362	1
AT1G14090	-0.276314	0.833105	-0.130179	0.893823	0.146135	1
AT1G14120	0.0912596	0.982686	0.270232	0.580354	0.178973	1
AT1G14130	0.167291	0.4552	0.352869	0.00079075	0.185577	0.674632
AT1G14140	-0.0573856	0.991955	-0.202599	0.628514	-0.145214	1
AT1G14150	0.298657	0.924762	-0.466567	0.618795	-0.765224	0.637434
AT1G14160	-0.0714087	0.991656	-0.244054	0.638406	-0.172645	1
AT1G14170	-0.0528629	0.985131	-0.0317625	0.964101	0.0211004	1
AT1G14180	0.00353294	1	-0.110142	0.927894	-0.113675	1
AT1G14182	-0.43886	0.97053	0.0767123	0.987054	0.515572	1
AT1G14185	1.41917	0.000329777	1.88205	6.88902e-08	0.462882	1
AT1G14190	0.543095	0.191628	1.00654	9.04419e-05	0.463447	0.672639
AT1G14200	-0.00420867	1	-0.345192	0.668341	-0.340984	1
AT1G14205	-0.245392	0.978725	-0.651984	0.588757	-0.406592	1
AT1G14210	-0.0997198	0.922378	-0.00566787	0.993046	0.0940519	1
AT1G14220	0.0955431	0.998916	0.210781	0.935792	0.115238	1
AT1G14230	-0.0722754	0.920426	-0.143137	0.364829	-0.0708614	1
AT1G14240	-0.207821	0.772665	0.146587	0.779083	0.354407	0.587024
AT1G14250	0	1	0	1	0	1
AT1G14260	0.0550422	0.998916	0.402143	0.574129	0.347101	1
AT1G14270	-0.182741	0.933121	-0.169866	0.828157	0.0128744	1
AT1G14280	0.489475	0.015076	0.793335	6.2767e-07	0.303861	0.688248
AT1G14290	0.00126559	1	-0.0906791	0.730896	-0.0919447	1
AT1G14300	0.0425136	0.997172	0.174943	0.798936	0.132429	1
AT1G14310	-0.0301395	0.999584	-0.115854	0.872814	-0.0857143	1
AT1G14315	1.90196	1	0	1	-1.85952	1
AT1G14320	0.0460561	0.980743	0.09171	0.748112	0.0456539	1
AT1G14330	0.0704914	0.975863	0.127306	0.747183	0.0568149	1
AT1G14340	-0.0741994	0.973127	0.0184434	0.982938	0.0926428	1
AT1G14345	-0.154286	0.974142	-0.456963	0.419715	-0.302677	1
AT1G14350	0.00130176	1	0.0276668	0.974404	0.026365	1
AT1G14360	0.0937348	0.97141	-0.159572	0.741522	-0.253307	0.9967
AT1G14370	-0.316365	0.0233841	-0.360503	0.00309181	-0.0441377	1
AT1G14380	-0.0896707	0.930977	-0.0910381	0.80169	-0.00136742	1
AT1G14390	0.582696	0.187811	0.661544	0.0579841	0.078848	1
AT1G14400	-0.0503445	0.916882	0.0328782	0.886192	0.0832227	1
AT1G14410	0.350616	0.339424	0.261107	0.507774	-0.089509	1
AT1G14420	0	1	1.89373	0.72403	1.8602	1
AT1G14430	0.0366166	1	0.193593	0.902632	0.156977	1
AT1G14440	0.18459	0.991955	-0.428301	0.820943	-0.612892	1
AT1G14450	0.120865	0.850907	0.0638383	0.886349	-0.0570265	1
AT1G14455	0.0337007	1	0.195421	1	0.16172	1
AT1G14460	0.22718	0.368929	-0.0362234	0.952766	-0.263403	0.530461
AT1G14470	-0.293579	0.916882	-0.0209129	0.992699	0.272666	1
AT1G14480	-0.130664	0.871127	-0.0817146	0.869581	0.048949	1
AT1G14490	0.621866	0.909107	-0.607919	0.814305	-1.22979	1
AT1G14500	4.40223	1.59461e-09	5.36356	7.14551e-15	0.961324	0.0890658
AT1G14510	0.0451156	0.976865	0.0674722	0.817611	0.0223567	1
AT1G14518	0.959761	1	-1.8786	1	-2.83836	1
AT1G14520	-0.0764651	0.984507	0.119271	0.859749	0.195737	1
AT1G14530	-0.0141298	1	0.0172856	0.987555	0.0314153	1
AT1G14540	-0.261367	0.901673	-0.856482	0.0165439	-0.595114	0.620704
AT1G14550	-0.499476	0.945931	-0.63307	0.753759	-0.133594	1
AT1G14560	0.129491	0.777807	0.117553	0.673274	-0.0119379	1
AT1G14570	-0.0533552	0.942832	-0.0820551	0.648112	-0.0286999	1
AT1G14580	-0.246026	0.580031	-0.209395	0.563261	0.0366307	1
AT1G14590	0.121084	0.978456	-0.0492899	0.970542	-0.170374	1
AT1G14600	-0.343839	0.884066	-0.251633	0.842115	0.0922062	1
AT1G14610	0.0595608	0.939182	0.0909679	0.630418	0.0314071	1
AT1G14620	0.218205	0.856841	0.0321308	0.979995	-0.186074	1
AT1G14630	0.982712	0.0457478	0.70063	0.229977	-0.282082	1
AT1G14640	-0.195286	0.958979	-0.0160817	0.992955	0.179205	1
AT1G14642	-0.114933	0.997971	0.4246	0.821795	0.539533	1
AT1G14650	0.037091	0.981595	0.0946978	0.621092	0.0576068	1
AT1G14660	-0.219309	0.800701	-0.236522	0.587462	-0.0172127	1
AT1G14670	0.156645	0.272244	0.0974461	0.585011	-0.0591987	1
AT1G14680	-0.121078	0.996415	-0.0119007	0.995976	0.109178	1
AT1G14685	0.0304491	0.99253	-0.10348	0.716941	-0.133929	1
AT1G14686	-1.33254	1	-0.329284	1	1.00326	1
AT1G14687	-0.0527952	0.999762	-0.263382	0.837475	-0.210587	1
AT1G14688	1.9017	1	1.91882	1	0.0171119	1
AT1G14690	0.316786	0.069804	0.253323	0.169285	-0.0634628	1
AT1G14700	0.248438	0.588773	0.274119	0.354498	0.0256811	1
AT1G14710	0.0261539	0.997172	0.083148	0.866968	0.0569941	1
AT1G14720	0.00492529	1	0.0476116	0.945821	0.0426863	1
AT1G14730	0.0647599	0.982686	0.101878	0.848086	0.0371176	1
AT1G14740	-0.0170296	0.998916	-0.0111081	0.986668	0.00592149	1
AT1G14750	-0.51867	0.868653	-0.367665	0.83629	0.151005	1
AT1G14755	1.89143	1	2.4852	1	0.593766	1
AT1G14760	-0.355771	0.978725	-1.18861	0.434191	-0.832843	1
AT1G14770	-0.115115	0.969894	-0.101185	0.89528	0.0139292	1
AT1G14780	-0.234091	0.881321	-0.241896	0.72403	-0.00780506	1
AT1G14790	-0.106502	0.972418	-0.203788	0.691638	-0.0972865	1
AT1G14810	0.109985	0.850024	0.0354894	0.943378	-0.0744955	1
AT1G14820	0.130225	0.910657	0.156059	0.693162	0.0258343	1
AT1G14830	0.0987796	0.755832	0.0443307	0.8852	-0.0544488	1
AT1G14840	0.248031	0.651099	-0.166285	0.749324	-0.414316	0.370983
AT1G14850	-0.0752342	0.954731	-0.079597	0.832408	-0.0043628	1
AT1G14860	-0.374587	0.0279094	-0.280443	0.132845	0.0941437	1
AT1G14870	-0.212002	0.815907	-0.249495	0.548614	-0.0374931	1
AT1G14880	0	1	0	1	0	1
AT1G14890	-0.156821	0.906738	-0.240401	0.534849	-0.0835797	1
AT1G14900	-0.0636337	0.971696	-0.157255	0.52819	-0.0936209	1
AT1G14910	-0.0425511	0.977264	-0.0426398	0.898733	-8.86961e-05	1
AT1G14920	0.158143	0.864164	0.347999	0.118918	0.189856	1
AT1G14930	-0.0280261	1	-0.520597	0.964354	-0.49257	1
AT1G14940	-2.86887	1	1.08282	1	3.95169	1
AT1G14950	-2.72621	0.844989	1.28624	0.896189	4.01244	0.953843
AT1G14960	-0.36271	0.798431	-0.102078	0.944417	0.260632	1
AT1G14970	0.0854179	0.981696	-0.0352291	0.974338	-0.120647	1
AT1G14980	0.171805	0.854675	0.0170914	0.987067	-0.154713	1
AT1G14990	0.0585109	0.992436	0.0117581	0.992699	-0.0467528	1
AT1G15000	-0.0515979	0.994927	-0.0451484	0.9637	0.00644952	1
AT1G15002	-1.70406	1	-0.952828	1	0.751235	1
AT1G15010	-0.311009	0.750388	-0.234008	0.745316	0.0770007	1
AT1G15015	0.499578	1	-0.539999	1	-1.03958	1
AT1G15020	-0.0632421	0.942832	0.00783773	0.988395	0.0710798	1
AT1G15030	-0.166464	0.58579	-0.146123	0.547396	0.0203413	1
AT1G15040	-0.698315	0.0693516	-0.582229	0.136862	0.116086	1
AT1G15050	-0.215982	0.988112	0.201734	0.936	0.417716	1
AT1G15060	-0.0501019	0.988346	-0.108949	0.792138	-0.0588475	1
AT1G15080	-0.370059	0.584406	0.036045	0.978468	0.406104	0.902559
AT1G15100	-0.609889	7.51486e-06	-0.86033	5.9827e-12	-0.250442	0.716585
AT1G15110	0.068855	0.971696	0.0877462	0.837548	0.0188912	1
AT1G15120	0.0174106	0.996415	0.0420362	0.89371	0.0246255	1
AT1G15125	-0.363246	0.599065	-0.203513	0.783317	0.159733	1
AT1G15130	-0.0141649	0.99683	0.0603186	0.775403	0.0744835	1
AT1G15140	0.20068	0.370015	0.224066	0.170854	0.0233865	1
AT1G15150	0.995324	0.976268	1.00419	0.894065	0.00886397	1
AT1G15160	0.0163036	1	-0.159736	0.869709	-0.176039	1
AT1G15165	0.0666702	0.996415	-0.0515341	0.970218	-0.118204	1
AT1G15170	-0.0064596	1	-0.0221624	0.976726	-0.0157028	1
AT1G15175	0.670384	0.854675	0.766017	0.621902	0.0956326	1
AT1G15180	-0.035885	0.998119	-0.128918	0.847891	-0.093033	1
AT1G15190	0.23996	0.94973	0.267467	0.806782	0.0275068	1
AT1G15200	0.0277652	0.99253	0.039748	0.922059	0.0119828	1
AT1G15210	0.0862895	0.945773	0.067612	0.8785	-0.0186775	1
AT1G15215	0.375165	0.549503	-0.00482523	0.997274	-0.379991	0.953843
AT1G15220	-0.0728471	0.980722	-0.00346686	0.996648	0.0693802	1
AT1G15230	-0.270128	0.404492	-0.299682	0.199504	-0.0295541	1
AT1G15240	-0.0908446	0.843036	0.0259792	0.949624	0.116824	1
AT1G15250	0.176569	0.881601	0.172238	0.751192	-0.00433041	1
AT1G15260	0.577116	0.729473	0.212272	0.909319	-0.364844	1
AT1G15270	0.0504565	0.951085	0.0507727	0.836541	0.000316172	1
AT1G15280	-0.020411	0.996415	0.0363686	0.927317	0.0567796	1
AT1G15290	-0.0414599	0.998916	-0.396202	0.362673	-0.354742	1
AT1G15300	0.0592889	0.992436	0.0192671	0.987555	-0.0400218	1
AT1G15310	0.0541884	0.991955	0.117515	0.827765	0.0633269	1
AT1G15320	-0.949152	1	-0.339978	1	0.609174	1
AT1G15330	-0.453942	0.974144	-0.270036	0.948555	0.183905	1
AT1G15340	-0.00646576	1	-0.00411618	0.992955	0.00234958	1
AT1G15350	-0.0333957	0.990334	-0.0261529	0.952927	0.00724279	1
AT1G15360	-0.209364	1	-0.936233	1	-0.726869	1
AT1G15370	0.0107774	1	0.069372	0.836541	0.0585946	1
AT1G15380	-0.0169303	1	0.119184	0.942197	0.136114	1
AT1G15385	-0.826008	1	0.870464	0.813293	1.69647	1
AT1G15390	0.155006	0.884066	0.203433	0.588701	0.0484269	1
[truncated: 24,020 more rows]

## Sheet: D5
gene	5uM-Pic-D-H vs Mock-D-H log2fc	padj.x	推荐标准：q<0.1, log2fc>0.58 or <-0.58
[truncated: 1,028 more rows]

[truncated: 6 more sheets: D50, D50vsD5, light degs, L5, L50, L50vsL5]
