# Supplementary material for: Apoplastic pH determines the hypocotyl response to auxin dosage and light
Source: Research Square preprint supplement (doi:10.21203/rs.3.rs-3625192/v1), 2023-12-19
Supplement: Supplementary file 5 [file e3650998f91aacf8c4a0a17d.xlsx]

## Sheet: Sheet1
Purpose	Primer name	sequences 5'-3'
transgenic materials	35S:SAUR15-GFP F	GCTCTAGAATGGCTTTTTTGAGGAGTTTCTTG
transgenic materials	35S:SAUR15-GFP R	CCGCTCGAGTTGTATCTGAGATGTGACTGTGAA
transgenic materials	35S:SAUR16 F	GCTCTAGAATGGCGGTAAAGAGATCTTCTAAG
transgenic materials	35S:SAUR16 R	CGAGCTCTCATCTGATCATGGATGTTAGAG
transgenic materials	35S:SAUR50 F	GCTCTAGAATGGCTATAATGAAGAAAACTTC
transgenic materials	35S:SAUR50 R	CGAGCTCTCATCGGATCATGGATGTTAGGG
transgenic materials	35S:SAUR63-GFP F	GCTCTAGAATGATAAACGCAAAGAAGCTTATG
transgenic materials	35S:SAUR63-GFP R	CCGCTCGAGAAATACAAGCAACTGTTGCGTAG
transgenic materials	35S:SAUR66-GFP F	GCTCTAGAATGATGAACACAAAGAAGCTAATC
transgenic materials	35S:SAUR66-GFP R	CCGCTCGAGAAATACAAGCAATTGTTGAGTACTC
RT-PCR	SAUR15 F	GAGGAGTTTCTTGGGTGCTAAGC
RT-PCR	SAUR15 R	GTATGAAACCGGCACCACATATC
RT-PCR	SAUR16 F	CCCTCTTGACGTACCAAAGG
RT-PCR	SAUR16 R	CCCATGTCATGACGAAAGCC
RT-PCR	SAUR19 F	CTTCAAGAGCTTCATAATAATTCAAACTTC
RT-PCR	SAUR19 R	CTGAAGGAAAAAATGTTGGATCATCTTC
RT-PCR	SAUR50 F	CACTTCCCTGTCTATGTCGGA
RT-PCR	SAUR50 R	TCTTCCTCGGCTCGTTGTAA
RT-PCR	SAUR63 F	GAGCAACTCTGTTGTCCAGGAG
RT-PCR	SAUR63 R	GACGAGATACTCTAAAAAGGCCGA
RT-PCR	SAUR66 F	CGCTCAACCACTGTAGAGAAGGG
RT-PCR	SAUR66 R	GGTAATGTGATTGGTCCACCGG
RT-PCR	PP2A F	TATCGGATGACGATTCTTCGTGCAG
RT-PCR	PP2A R	GCTTGGTCGACTATCGGAATGAGAG
